# Supplementary material for: Health risk assessment from habitants of Araró, Michoacán, México, exposed to arsenic by dust, using Monte Carlo probabilistic method
Source: PeerJ. 2025 Jun 10;13:e18805. doi: 10.7717/peerj.18805 (PMC12164815; doi:10.7717/peerj.18805)
Supplement: Supplemental Information 1 [file peerj-13-18805-s001.xlsx]

## Sheet: Risk Premises
Study Title:	Ingestión premisas simulación.					Last simulation run:
Study File:	Ingestión premisas simulación.xlsx					2022-11-04 19:43:00
	Output Cells	Histogram settings				Multi-cell output range names
Description for Reports	Range Names	Min value	Max value	Step size		title row or column (optional)
	ADD	Auto	Auto	Auto
	ADDc	Auto	Auto	Auto
	CR	Auto	Auto	Auto
	HQ	Auto	Auto	Auto
		Study	Min				Max
	Input Cells	File	Allowed		Expected		Allowed
Description for Reports	Range Names	Values	Values	10/90	Values	90/10	Values	Distributions	Parameters and chart settings
	BW	72.67	18.5	45.1879	73.0913	100.903	194.2	Normal	Mean	72.67	std dev	21.9625	X Axis Min	auto	X Axis Max	auto
	Cs	15.6	5.94	10.1171	15.7996	21.5085	42.53	Normal	Mean	15.6	std dev	4.57375	X Axis Min	auto	X Axis Max	auto
	ED	45.94	20	31.9828	46.2808	60.5952	111	Normal	Mean	45.94	std dev	11.375	X Axis Min	auto	X Axis Max	auto
	IR	30	4	15.5031	30.4649	45.488	100	Normal	Mean	30	std dev	12	X Axis Min	auto	X Axis Max	auto

## Sheet: Simulation Summary
	10000	Simulations run
					Change in expected values as simulations increase									Change in standard deviation as simulations increase
	Minimum result	Maximum result	Expected value	Std deviation	125	250	500	1000	2000	4000	8000	10000		125	250	500	1000	2000	4000	8000	10000
ADD	2.17169e-07	7.65843e-05	7.36091e-06	5.12245e-06	-	-0.0165926	0.0163558	0.00557709	-0.01594	0.0118428	0.00199387	0.00312838		-	-0.0278945	0.126622	0.0806715	-0.0418272	0.0231578	-0.0344138	-0.00167175
ADDc	1.36936e-07	4.82901e-05	4.64142e-06	3.22996e-06	-	-0.0165926	0.0163558	0.00557709	-0.01594	0.0118428	0.00199387	0.00312838		-	-0.0278945	0.126622	0.0806715	-0.0418272	0.0231578	-0.0344138	-0.00167175
CR	9.12906e-08	3.21934e-05	3.09428e-06	2.1533e-06	-	-0.0165926	0.0163558	0.00557709	-0.01594	0.0118428	0.00199387	0.00312838		-	-0.0278945	0.126622	0.0806715	-0.0418272	0.0231578	-0.0344138	-0.00167175
HQ	0.000723898	0.255281	0.0245364	0.0170748	-	-0.0165926	0.0163558	0.00557709	-0.01594	0.0118428	0.00199387	0.00312838		-	-0.0278945	0.126622	0.0806715	-0.0418272	0.0231578	-0.0344138	-0.00167175

## Sheet: Simulation variance
This worksheet shows the convergence of the output variables as a function of the number of simulations
You should run enough simulations until the % change is very small, typically < 1.0%
ADD
	# of Sims	125	250	500	1000	2000	4000	8000	10000
	Avg Value	7.3178e-06	7.19638e-06	7.31409e-06	7.35488e-06	7.23764e-06	7.32335e-06	7.33796e-06	7.36091e-06
	% Chg		-0.0165926	0.0163558	0.00557709	-0.01594	0.0118428	0.00199387	0.00312838
	Std Dev.	4.57975e-06	4.452e-06	5.01572e-06	5.42035e-06	5.19363e-06	5.3139e-06	5.13103e-06	5.12245e-06
	% Chg		-0.0278945	0.126622	0.0806715	-0.0418272	0.0231578	-0.0344138	-0.00167175
ADDc
	# of Sims	125	250	500	1000	2000	4000	8000	10000
	Avg Value	4.61423e-06	4.53767e-06	4.61189e-06	4.63761e-06	4.56369e-06	4.61773e-06	4.62694e-06	4.64142e-06
	% Chg		-0.0165926	0.0163558	0.00557709	-0.01594	0.0118428	0.00199387	0.00312838
	Std Dev.	2.88776e-06	2.8072e-06	3.16266e-06	3.41779e-06	3.27484e-06	3.35067e-06	3.23537e-06	3.22996e-06
	% Chg		-0.0278945	0.126622	0.0806715	-0.0418272	0.0231578	-0.0344138	-0.00167175
CR
	# of Sims	125	250	500	1000	2000	4000	8000	10000
	Avg Value	3.07616e-06	3.02511e-06	3.07459e-06	3.09174e-06	3.04246e-06	3.07849e-06	3.08463e-06	3.09428e-06
	% Chg		-0.0165926	0.0163558	0.00557709	-0.01594	0.0118428	0.00199387	0.00312838
	Std Dev.	1.92517e-06	1.87147e-06	2.10844e-06	2.27853e-06	2.18322e-06	2.23378e-06	2.15691e-06	2.1533e-06
	% Chg		-0.0278945	0.126622	0.0806715	-0.0418272	0.0231578	-0.0344138	-0.00167175
HQ
	# of Sims	125	250	500	1000	2000	4000	8000	10000
	Avg Value	0.0243927	0.0239879	0.0243803	0.0245163	0.0241255	0.0244112	0.0244599	0.0245364
	% Chg		-0.0165926	0.0163558	0.00557709	-0.01594	0.0118428	0.00199387	0.00312838
	Std Dev.	0.0152658	0.01484	0.0167191	0.0180678	0.0173121	0.017713	0.0171034	0.0170748
	% Chg		-0.0278945	0.126622	0.0806715	-0.0418272	0.0231578	-0.0344138	-0.00167175

## Sheet: ADD Results
ADD Results
Minimum result	2.17169e-07				6.44007e-06	Study value
Maximum result	7.65843e-05				0.5303	of results are equal or lower
Expected value	7.36091e-06				0.4697	of results are equal or greater
Std Deviation	5.12245e-06
Out of 10000 simulations		Of those with numeric values:
10000 had numeric values.			5% <=	1.8375e-06
0 had error values.			10% <=	2.43229e-06
			15% <=	2.95882e-06
			20% <=	3.40338e-06
			25% <=	3.88145e-06
			30% <=	4.31926e-06
			35% <=	4.7393e-06
			40% <=	5.16096e-06
			45% <=	5.63104e-06
			50% <=	6.11657e-06
			55% <=	6.65412e-06
			60% <=	7.23619e-06
			65% <=	7.86031e-06
			70% <=	8.59859e-06
			75% <=	9.44357e-06
			80% <=	1.04661e-05
			85% <=	1.18058e-05
			90% <=	1.37198e-05
			95% <=	1.68179e-05
			100% <=	7.65843e-05
If ADD is:				6.44007e-06	0.5303	of results are equal or lower
(Chg to do what ifs)					0.4697	of results are greater
					Cumulative				Cumulative
ADD	frequency:				frequency:				frequency:
<=2.17169E-07	1	0.0001		<=2.17169E-07	1	0.0001		=>2.17169E-07	10000	1
2.17169E-07 to 4.23649E-06	2902	0.2902		<=4.23649E-06	2903	0.2903		=>4.23649E-06	7097	0.7097
4.23649E-06 to 8.25581E-06	3883	0.3883		<=8.25581E-06	6786	0.6786		=>8.25581E-06	3214	0.3214
8.25581E-06 to 1.22751E-05	1851	0.1851		<=1.22751E-05	8637	0.8637		=>1.22751E-05	1363	0.1363
1.22751E-05 to 1.62945E-05	801	0.0801		<=1.62945E-05	9438	0.9438		=>1.62945E-05	562	0.0562
1.62945E-05 to 2.03138E-05	303	0.0303		<=2.03138E-05	9741	0.9741		=>2.03138E-05	259	0.0259
2.03138E-05 to 2.43331E-05	134	0.0134		<=2.43331E-05	9875	0.9875		=>2.43331E-05	125	0.0125
2.43331E-05 to 2.83524E-05	65	0.0065		<=2.83524E-05	9940	0.994		=>2.83524E-05	60	0.006
2.83524E-05 to 3.23717E-05	32	0.0032		<=3.23717E-05	9972	0.9972		=>3.23717E-05	28	0.0028
3.23717E-05 to 3.63911E-05	11	0.0011		<=3.63911E-05	9983	0.9983		=>3.63911E-05	17	0.0017
3.63911E-05 to 4.04104E-05	9	0.0009		<=4.04104E-05	9992	0.9992		=>4.04104E-05	8	0.0008
4.04104E-05 to 4.44297E-05	3	0.0003		<=4.44297E-05	9995	0.9995		=>4.44297E-05	5	0.0005
4.44297E-05 to 4.8449E-05	0	0		<=4.8449E-05	9995	0.9995		=>4.8449E-05	5	0.0005
4.8449E-05 to 5.24684E-05	2	0.0002		<=5.24684E-05	9997	0.9997		=>5.24684E-05	3	0.0003
5.24684E-05 to 5.64877E-05	1	0.0001		<=5.64877E-05	9998	0.9998		=>5.64877E-05	2	0.0002
5.64877E-05 to 6.0507E-05	1	0.0001		<=6.0507E-05	9999	0.9999		=>6.0507E-05	1	0.0001
6.0507E-05 to 6.45263E-05	0	0		<=6.45263E-05	9999	0.9999		=>6.45263E-05	1	0.0001
6.45263E-05 to 6.85456E-05	0	0		<=6.85456E-05	9999	0.9999		=>6.85456E-05	1	0.0001
6.85456E-05 to 7.2565E-05	0	0		<=7.2565E-05	9999	0.9999		=>7.2565E-05	1	0.0001
7.2565E-05 to 7.65843E-05	1	0.0001		<=7.65843E-05	10000	1		=>7.65843E-05	1	0.0001
>7.65843E-05	0	0
Bin Size	4.01932e-06
Number of bins	21
# of Sims	Avg Value	% Chg		Std Dev.	% Chg
125	7.3178e-06			4.57975e-06
250	7.19638e-06	-0.0165926		4.452e-06	-0.0278945
500	7.31409e-06	0.0163558		5.01572e-06	0.126622
1000	7.35488e-06	0.00557709		5.42035e-06	0.0806715
2000	7.23764e-06	-0.01594		5.19363e-06	-0.0418272
4000	7.32335e-06	0.0118428		5.3139e-06	0.0231578
8000	7.33796e-06	0.00199387		5.13103e-06	-0.0344138
10000	7.36091e-06	0.00312838		5.12245e-06	-0.00167175

## Sheet: ADDc Results
ADDc Results
Minimum result	1.36936e-07				4.06078e-06	Study value
Maximum result	4.82901e-05				0.5303	of results are equal or lower
Expected value	4.64142e-06				0.4697	of results are equal or greater
Std Deviation	3.22996e-06
Out of 10000 simulations		Of those with numeric values:
10000 had numeric values.			5% <=	1.15863e-06
0 had error values.			10% <=	1.53368e-06
			15% <=	1.86568e-06
			20% <=	2.146e-06
			25% <=	2.44744e-06
			30% <=	2.7235e-06
			35% <=	2.98836e-06
			40% <=	3.25424e-06
			45% <=	3.55065e-06
			50% <=	3.8568e-06
			55% <=	4.19575e-06
			60% <=	4.56277e-06
			65% <=	4.95631e-06
			70% <=	5.42183e-06
			75% <=	5.95464e-06
			80% <=	6.59939e-06
			85% <=	7.44415e-06
			90% <=	8.65102e-06
			95% <=	1.06045e-05
			100% <=	4.82901e-05
If ADDc is:				4.06078e-06	0.5303	of results are equal or lower
(Chg to do what ifs)					0.4697	of results are greater
					Cumulative				Cumulative
ADDc	frequency:				frequency:				frequency:
<=1.36936E-07	1	0.0001		<=1.36936E-07	1	0.0001		=>1.36936E-07	10000	1
1.36936E-07 to 2.67132E-06	2902	0.2902		<=2.67132E-06	2903	0.2903		=>2.67132E-06	7097	0.7097
2.67132E-06 to 5.20569E-06	3883	0.3883		<=5.20569E-06	6786	0.6786		=>5.20569E-06	3214	0.3214
5.20569E-06 to 7.74007E-06	1851	0.1851		<=7.74007E-06	8637	0.8637		=>7.74007E-06	1363	0.1363
7.74007E-06 to 1.02745E-05	801	0.0801		<=1.02745E-05	9438	0.9438		=>1.02745E-05	562	0.0562
1.02745E-05 to 1.28088E-05	303	0.0303		<=1.28088E-05	9741	0.9741		=>1.28088E-05	259	0.0259
1.28088E-05 to 1.53432E-05	134	0.0134		<=1.53432E-05	9875	0.9875		=>1.53432E-05	125	0.0125
1.53432E-05 to 1.78776E-05	65	0.0065		<=1.78776E-05	9940	0.994		=>1.78776E-05	60	0.006
1.78776E-05 to 2.0412E-05	32	0.0032		<=2.0412E-05	9972	0.9972		=>2.0412E-05	28	0.0028
2.0412E-05 to 2.29464E-05	11	0.0011		<=2.29464E-05	9983	0.9983		=>2.29464E-05	17	0.0017
2.29464E-05 to 2.54807E-05	9	0.0009		<=2.54807E-05	9992	0.9992		=>2.54807E-05	8	0.0008
2.54807E-05 to 2.80151E-05	3	0.0003		<=2.80151E-05	9995	0.9995		=>2.80151E-05	5	0.0005
2.80151E-05 to 3.05495E-05	0	0		<=3.05495E-05	9995	0.9995		=>3.05495E-05	5	0.0005
3.05495E-05 to 3.30839E-05	2	0.0002		<=3.30839E-05	9997	0.9997		=>3.30839E-05	3	0.0003
3.30839E-05 to 3.56182E-05	1	0.0001		<=3.56182E-05	9998	0.9998		=>3.56182E-05	2	0.0002
3.56182E-05 to 3.81526E-05	1	0.0001		<=3.81526E-05	9999	0.9999		=>3.81526E-05	1	0.0001
3.81526E-05 to 4.0687E-05	0	0		<=4.0687E-05	9999	0.9999		=>4.0687E-05	1	0.0001
4.0687E-05 to 4.32214E-05	0	0		<=4.32214E-05	9999	0.9999		=>4.32214E-05	1	0.0001
4.32214E-05 to 4.57558E-05	0	0		<=4.57558E-05	9999	0.9999		=>4.57558E-05	1	0.0001
4.57558E-05 to 4.82901E-05	1	0.0001		<=4.82901E-05	10000	1		=>4.82901E-05	1	0.0001
>4.82901E-05	0	0
Bin Size	2.53438e-06
Number of bins	21
# of Sims	Avg Value	% Chg		Std Dev.	% Chg
125	4.61423e-06			2.88776e-06
250	4.53767e-06	-0.0165926		2.8072e-06	-0.0278945
500	4.61189e-06	0.0163558		3.16266e-06	0.126622
1000	4.63761e-06	0.00557709		3.41779e-06	0.0806715
2000	4.56369e-06	-0.01594		3.27484e-06	-0.0418272
4000	4.61773e-06	0.0118428		3.35067e-06	0.0231578
8000	4.62694e-06	0.00199387		3.23537e-06	-0.0344138
10000	4.64142e-06	0.00312838		3.22996e-06	-0.00167175

## Sheet: CR Results
CR Results
Minimum result	9.12906e-08				2.70719e-06	Study value
Maximum result	3.21934e-05				0.5303	of results are equal or lower
Expected value	3.09428e-06				0.4697	of results are equal or greater
Std Deviation	2.1533e-06
Out of 10000 simulations		Of those with numeric values:
10000 had numeric values.			5% <=	7.72421e-07
0 had error values.			10% <=	1.02245e-06
			15% <=	1.24379e-06
			20% <=	1.43067e-06
			25% <=	1.63163e-06
			30% <=	1.81567e-06
			35% <=	1.99224e-06
			40% <=	2.16949e-06
			45% <=	2.3671e-06
			50% <=	2.5712e-06
			55% <=	2.79717e-06
			60% <=	3.04185e-06
			65% <=	3.30421e-06
			70% <=	3.61456e-06
			75% <=	3.96976e-06
			80% <=	4.39959e-06
			85% <=	4.96276e-06
			90% <=	5.76734e-06
			95% <=	7.06967e-06
			100% <=	3.21934e-05
If CR is:				2.70719e-06	0.5303	of results are equal or lower
(Chg to do what ifs)					0.4697	of results are greater
					Cumulative				Cumulative
CR	frequency:				frequency:				frequency:
<=9.12906E-08	1	0.0001		<=9.12906E-08	1	0.0001		=>9.12906E-08	10000	1
9.12906E-08 to 1.78088E-06	2902	0.2902		<=1.78088E-06	2903	0.2903		=>1.78088E-06	7097	0.7097
1.78088E-06 to 3.47046E-06	3883	0.3883		<=3.47046E-06	6786	0.6786		=>3.47046E-06	3214	0.3214
3.47046E-06 to 5.16005E-06	1851	0.1851		<=5.16005E-06	8637	0.8637		=>5.16005E-06	1363	0.1363
5.16005E-06 to 6.84964E-06	801	0.0801		<=6.84964E-06	9438	0.9438		=>6.84964E-06	562	0.0562
6.84964E-06 to 8.53922E-06	303	0.0303		<=8.53922E-06	9741	0.9741		=>8.53922E-06	259	0.0259
8.53922E-06 to 1.02288E-05	134	0.0134		<=1.02288E-05	9875	0.9875		=>1.02288E-05	125	0.0125
1.02288E-05 to 1.19184E-05	65	0.0065		<=1.19184E-05	9940	0.994		=>1.19184E-05	60	0.006
1.19184E-05 to 1.3608E-05	32	0.0032		<=1.3608E-05	9972	0.9972		=>1.3608E-05	28	0.0028
1.3608E-05 to 1.52976E-05	11	0.0011		<=1.52976E-05	9983	0.9983		=>1.52976E-05	17	0.0017
1.52976E-05 to 1.69872E-05	9	0.0009		<=1.69872E-05	9992	0.9992		=>1.69872E-05	8	0.0008
1.69872E-05 to 1.86767E-05	3	0.0003		<=1.86767E-05	9995	0.9995		=>1.86767E-05	5	0.0005
1.86767E-05 to 2.03663E-05	0	0		<=2.03663E-05	9995	0.9995		=>2.03663E-05	5	0.0005
2.03663E-05 to 2.20559E-05	2	0.0002		<=2.20559E-05	9997	0.9997		=>2.20559E-05	3	0.0003
2.20559E-05 to 2.37455E-05	1	0.0001		<=2.37455E-05	9998	0.9998		=>2.37455E-05	2	0.0002
2.37455E-05 to 2.54351E-05	1	0.0001		<=2.54351E-05	9999	0.9999		=>2.54351E-05	1	0.0001
2.54351E-05 to 2.71247E-05	0	0		<=2.71247E-05	9999	0.9999		=>2.71247E-05	1	0.0001
2.71247E-05 to 2.88143E-05	0	0		<=2.88143E-05	9999	0.9999		=>2.88143E-05	1	0.0001
2.88143E-05 to 3.05038E-05	0	0		<=3.05038E-05	9999	0.9999		=>3.05038E-05	1	0.0001
3.05038E-05 to 3.21934E-05	1	0.0001		<=3.21934E-05	10000	1		=>3.21934E-05	1	0.0001
>3.21934E-05	0	0
Bin Size	1.68959e-06
Number of bins	21
# of Sims	Avg Value	% Chg		Std Dev.	% Chg
125	3.07616e-06			1.92517e-06
250	3.02511e-06	-0.0165926		1.87147e-06	-0.0278945
500	3.07459e-06	0.0163558		2.10844e-06	0.126622
1000	3.09174e-06	0.00557709		2.27853e-06	0.0806715
2000	3.04246e-06	-0.01594		2.18322e-06	-0.0418272
4000	3.07849e-06	0.0118428		2.23378e-06	0.0231578
8000	3.08463e-06	0.00199387		2.15691e-06	-0.0344138
10000	3.09428e-06	0.00312838		2.1533e-06	-0.00167175

## Sheet: HQ Results
HQ Results
Minimum result	0.000723898				0.0214669	Study value
Maximum result	0.255281				0.5303	of results are equal or lower
Expected value	0.0245364				0.4697	of results are equal or greater
Std Deviation	0.0170748
Out of 10000 simulations		Of those with numeric values:
10000 had numeric values.			5% <=	0.00612499
0 had error values.			10% <=	0.00810763
			15% <=	0.00986272
			20% <=	0.0113446
			25% <=	0.0129382
			30% <=	0.0143975
			35% <=	0.0157977
			40% <=	0.0172032
			45% <=	0.0187701
			50% <=	0.0203886
			55% <=	0.0221804
			60% <=	0.0241206
			65% <=	0.026201
			70% <=	0.028662
			75% <=	0.0314786
			80% <=	0.034887
			85% <=	0.0393527
			90% <=	0.0457327
			95% <=	0.0560596
			100% <=	0.255281
If HQ is:				0.0214669	0.5303	of results are equal or lower
(Chg to do what ifs)					0.4697	of results are greater
					Cumulative				Cumulative
HQ	frequency:				frequency:				frequency:
<=0.000723898	1	0.0001		<=0.000723898	1	0.0001		=>0.000723898	10000	1
0.000723898 to 0.014121638	2902	0.2902		<=0.014121638	2903	0.2903		=>0.014121638	7097	0.7097
0.014121638 to 0.027519377	3883	0.3883		<=0.027519377	6786	0.6786		=>0.027519377	3214	0.3214
0.027519377 to 0.040917117	1851	0.1851		<=0.040917117	8637	0.8637		=>0.040917117	1363	0.1363
0.040917117 to 0.054314857	801	0.0801		<=0.054314857	9438	0.9438		=>0.054314857	562	0.0562
0.054314857 to 0.067712597	303	0.0303		<=0.067712597	9741	0.9741		=>0.067712597	259	0.0259
0.067712597 to 0.081110336	134	0.0134		<=0.081110336	9875	0.9875		=>0.081110336	125	0.0125
0.081110336 to 0.094508076	65	0.0065		<=0.094508076	9940	0.994		=>0.094508076	60	0.006
0.094508076 to 0.107905816	32	0.0032		<=0.107905816	9972	0.9972		=>0.107905816	28	0.0028
0.107905816 to 0.121303556	11	0.0011		<=0.121303556	9983	0.9983		=>0.121303556	17	0.0017
0.121303556 to 0.134701295	9	0.0009		<=0.134701295	9992	0.9992		=>0.134701295	8	0.0008
0.134701295 to 0.148099035	3	0.0003		<=0.148099035	9995	0.9995		=>0.148099035	5	0.0005
0.148099035 to 0.161496775	0	0		<=0.161496775	9995	0.9995		=>0.161496775	5	0.0005
0.161496775 to 0.174894515	2	0.0002		<=0.174894515	9997	0.9997		=>0.174894515	3	0.0003
0.174894515 to 0.188292254	1	0.0001		<=0.188292254	9998	0.9998		=>0.188292254	2	0.0002
0.188292254 to 0.201689994	1	0.0001		<=0.201689994	9999	0.9999		=>0.201689994	1	0.0001
0.201689994 to 0.215087734	0	0		<=0.215087734	9999	0.9999		=>0.215087734	1	0.0001
0.215087734 to 0.228485474	0	0		<=0.228485474	9999	0.9999		=>0.228485474	1	0.0001
0.228485474 to 0.241883213	0	0		<=0.241883213	9999	0.9999		=>0.241883213	1	0.0001
0.241883213 to 0.255280953	1	0.0001		<=0.255280953	10000	1		=>0.255280953	1	0.0001
>0.255280953	0	0
Bin Size	0.0133977
Number of bins	21
# of Sims	Avg Value	% Chg		Std Dev.	% Chg
125	0.0243927			0.0152658
250	0.0239879	-0.0165926		0.01484	-0.0278945
500	0.0243803	0.0163558		0.0167191	0.126622
1000	0.0245163	0.00557709		0.0180678	0.0806715
2000	0.0241255	-0.01594		0.0173121	-0.0418272
4000	0.0244112	0.0118428		0.017713	0.0231578
8000	0.0244599	0.00199387		0.0171034	-0.0344138
10000	0.0245364	0.00312838		0.0170748	-0.00167175

## Sheet: Simulation Input Values 1
Sim #	BW	Cs	ED	IR
1	42.7069	15.2497	46.9963	15.9161
2	84.2163	21.6577	49.7719	42.976
3	81.5258	18.8424	34.4232	23.2272
4	80.3446	13.1567	42.1894	27.6776
5	47.7348	14.0137	55.1454	31.3067
6	98.2014	7.45047	38.562	47.8191
7	77.8396	15.6374	39.0736	45.3726
8	100.586	11.8221	47.953	10.9743
9	74.561	12.2024	64.4885	40.8631
10	92.3039	23.1444	41.4996	18.7566
11	62.7311	22.0366	35.4869	36.6468
12	98.7398	21.4386	58.4204	37.3756
13	90.0335	20.1883	44.3988	68.2817
14	52.7115	13.148	43.2389	27.1018
15	64.7783	19.9776	57.5333	20.0128
16	96.7169	20.9059	39.5302	26.7349
17	18.5807	16.2169	35.6826	18.5801
18	73.5696	18.6313	51.6741	34.0215
19	68.1773	14.8529	51.4554	37.0709
20	52.9435	12.8438	21.6386	28.3894
21	46.4072	14.6196	25.1329	24.275
22	123.297	16.6832	41.5893	10.9498
23	107.935	15.0165	58.2083	31.6363
24	79.9979	9.93677	74.8283	12.1003
25	77.3882	12.5193	51.1211	44.4757
26	118.986	22.9935	69.3591	8.69969
27	77.1103	12.4472	28.4576	15.3952
28	81.1231	14.5867	51.3366	16.8753
29	51.3765	13.68	53.112	37.7824
30	61.6259	13.1643	65.1247	9.39315
31	89.9856	24.3504	58.188	39.5953
32	68.1781	18.1496	66.6868	37.8876
33	113.883	8.01767	37.7416	25.0887
34	55.1993	15.2323	54.6744	31.7675
35	59.2283	14.6649	55.8699	12.2507
36	52.9604	16.5586	57.4508	33.9858
37	87.5782	14.3019	34.7695	36.9859
38	77.8916	19.0668	46.0741	27.9551
39	72.3176	11.9873	23.406	33.5563
40	112.956	24.1104	45.7429	22.5192
41	43.6438	16.8776	53.8514	18.1962
42	77.9191	19.2411	44.0177	38.5534
43	50.9933	12.3466	58.6404	25.0206
44	32.6899	8.47301	41.1956	26.2194
45	93.3735	12.0339	46.0705	20.1108
46	78.7562	13.4363	32.2323	45.0564
47	56.585	16.9833	65.1363	26.8793
48	101.747	13.1667	27.8274	47.9191
49	32.9292	23.9184	33.9119	34.0402
50	60.0395	14.8561	41.5277	27.8708
51	102.26	18.4708	33.9606	19.9706
52	64.4973	14.1224	47.9729	17.9193
53	36.4408	20.4823	50.8395	29.3512
54	73.1852	15.0873	35.8934	20.4392
55	81.4969	11.9983	47.566	27.3292
56	66.9272	12.204	28.2428	30.6973
57	70.0257	10.79	40.2148	7.42284
58	69.0151	22.8848	63.0214	25.1329
59	52.0761	22.6954	47.3585	48.5035
60	61.3199	8.30962	64.4663	38.2219
61	41.0432	13.6824	47.5293	41.0542
62	69.9556	18.2505	33.3596	18.3776
63	68.3664	7.3741	53.1805	48.7953
64	77.7692	13.1284	61.3323	40.999
65	52.909	10.85	49.9657	20.0964
66	94.9877	16.667	39.3799	33.2742
67	98.8965	25.4775	56.8294	8.07522
68	80.383	20.8999	64.29	31.7986
69	83.5739	9.09607	46.3802	32.7241
70	80.534	13.9332	47.0025	19.3236
71	45.932	14.4809	38.863	34.5693
72	29.7425	6.03697	48.9699	24.9005
73	45.6984	16.4981	53.1912	38.1286
74	82.2805	18.4273	24.4575	43.3616
75	78.1627	13.9277	34.6232	36.4569
76	81.132	18.8661	46.456	18.0515
77	108.069	10.6335	57.3187	13.3403
78	87.4524	12.7277	31.7751	33.2221
79	71.2247	15.1382	50.9402	37.0887
80	109.383	19.2087	50.5858	15.5578
81	109.786	15.5839	49.1347	21.0992
82	108.259	18.805	42.0443	33.3406
83	46.3858	16.4537	36.6488	29.1443
84	79.66	12.5001	46.8404	16.905
85	80.8714	9.19638	30.3503	32.3987
86	58.6978	17.4312	41.1134	17.7385
87	92.2228	14.8105	67.5132	33.2853
88	79.2791	18.8609	74.0083	38.0824
89	92.6093	16.0253	55.3304	20.3772
90	41.5093	8.9465	45.682	28.9731
91	74.9307	12.5639	45.6724	14.1399
92	31.5626	22.0419	40.9792	23.5247
93	72.9016	15.7679	53.7656	34.953
94	87.9002	23.9224	24.955	19.1064
95	65.3972	20.018	47.3632	30.6642
96	104.207	17.958	49.6579	30.8007
97	69.4878	19.4282	49.0044	58.9201
98	44.1637	22.3968	34.9703	35.6329
99	51.2269	16.5271	61.7786	32.6095
100	56.1261	13.3834	36.9798	28.4678
101	79.4302	14.7277	38.1157	30.7062
102	50.1173	19.7494	41.6393	32.7512
103	33.38	10.9681	49.2684	20.9972
104	45.7162	12.4327	51.1134	24.268
105	59.7352	17.6985	56.2464	41.0227
106	55.8615	18.3028	39.8214	39.7217
107	64.2455	15.2441	61.2108	34.139
108	55.005	20.1478	49.7821	45.5073
109	43.3835	18.2122	51.9229	42.8207
110	127.353	23.2308	43.3729	36.9665
111	82.9804	13.5019	38.3596	32.4422
112	53.0227	19.3082	34.1737	21.1705
113	70.0565	16.5913	37.498	42.9041
114	56.3114	15.9544	56.7279	19.9296
115	79.5761	18.9932	54.2976	26.7003
116	96.5187	20.8631	38.3893	39.9429
117	62.4793	18.3011	39.2256	22.7944
118	72.0019	17.6552	40.7391	35.9263
119	93.6613	10.4778	53.3657	23.7674
120	80.073	8.48679	36.6716	27.1896
121	39.7876	18.6527	43.4672	21.0947
122	74.3429	19.8613	25.5138	10.9962
123	55.2423	15.8907	62.6717	34.2503
124	106.007	11.8955	48.2877	41.0325
125	55.5517	10.2457	56.3097	28.2058
126	79.1139	14.5589	53.8523	28.8812
127	60.7036	14.3726	42.2942	42.6342
128	41.2251	10.0907	56.4565	27.5138
129	101.895	13.1153	46.1238	49.7383
130	91.9075	13.8154	40.5599	41.8113
131	68.7632	21.2333	52.9819	36.9567
132	82.0421	19.3388	44.4129	31.8698
133	68.6067	21.1643	39.1161	58.493
134	81.2306	22.1576	39.3965	43.3489
135	76.6739	18.9471	35.7162	15.4697
136	56.4581	20.4792	69.0327	39.8585
137	57.3022	21.5597	57.3339	28.3725
138	92.3944	20.2989	38.8435	34.6556
139	24.6458	8.48331	44.6226	43.3983
140	59.5417	19.3502	65.1336	30.2924
141	51.8071	21.2356	47.5559	22.7032
142	68.7804	18.4385	43.9238	36.6032
143	53.9479	14.9412	46.3185	11.9023
144	75.624	13.7406	34.5327	25.4607
145	59.8753	17.3737	21.5913	35.4379
146	97.7649	14.9274	35.6408	40.5524
147	92.0742	20.1914	48.3868	8.79114
148	40.193	15.487	49.5703	20.6337
149	99.0904	12.2819	29.0176	15.4538
150	89.2904	9.41311	35.7595	53.5025
151	91.1082	14.8429	33.7637	25.9667
152	41.396	15.3254	50.0498	21.8695
153	75.6369	22.7628	55.965	23.4441
154	24.7892	7.33949	41.5001	29.1575
155	64.3297	17.2943	60.9895	44.5436
156	41.8512	19.2602	53.2838	42.0136
157	44.6687	13.5049	48.5675	18.5932
158	85.4687	21.383	56.84	41.0405
159	102.236	10.8338	57.8495	35.5165
160	93.8566	11.1425	52.2136	34.2962
161	77.9057	11.4344	65.2524	22.6589
162	74.6468	7.80657	55.1953	18.4198
163	97.6896	11.766	29.1634	24.9932
164	77.9135	16.5481	47.0311	25.353
165	76.2868	21.635	31.5162	23.5223
166	39.4945	17.3353	43.1789	11.6034
167	125.842	14.7377	50.2687	42.489
168	62.0832	17.29	51.3005	47.9629
169	89.3931	14.2813	40.6024	35.3395
170	95.3397	16.198	62.4637	39.6097
171	105.612	12.4858	38.033	43.7926
172	92.3413	14.7998	44.8994	18.1222
173	65.1599	19.3705	47.7559	30.9254
174	72.66	21.9345	59.2945	39.5079
175	65.4537	17.2618	63.4304	18.2404
176	93.8285	18.3557	46.7846	14.6702
177	48.3788	18.4016	26.1999	21.9175
178	98.6029	10.915	24.9571	37.9677
179	56.6022	19.9538	28.5888	37.0356
180	64.5492	16.3757	54.4917	12.1051
181	48.1456	7.51293	36.7761	28.7776
182	45.2953	22.0197	43.1929	33.4139
183	83.6764	12.981	36.4669	40.1656
184	79.5779	12.34	41.2808	33.958
185	81.7361	19.7627	54.6142	8.56537
186	74.7952	10.4034	38.812	32.2182
187	52.2293	18.3553	35.8129	45.9853
188	47.2537	12.8482	49.5805	33.0708
189	59.1638	14.6518	51.8752	15.4089
190	90.4694	22.616	33.3758	12.4745
191	64.8205	10.478	31.2406	39.9381
192	77.9214	15.1362	39.0342	10.2154
193	88.207	14.8393	35.6618	11.6647
194	85.9584	18.8093	54.793	40.0849
195	51.7855	18.274	38.9332	29.0463
196	29.4123	19.9803	35.294	23.4117
197	52.9065	18.1912	51.4592	30.5931
198	70.4992	12.5341	37.3982	36.2055
199	89.8581	24.0002	39.3487	18.9621
200	81.2346	17.6461	45.3229	44.9159
201	94.6279	13.9255	61.5851	25.7064
202	64.4472	13.5366	53.1828	50.5901
203	79.5478	16.6741	66.8108	27.9334
204	112.353	15.8313	48.1652	35.3029
205	60.0474	18.1254	56.7006	36.7738
206	27.9975	10.7113	57.059	5.19992
207	65.1573	16.4201	43.2859	54.805
208	84.2745	11.0228	32.3867	35.9799
209	61.73	14.0754	49.7313	50.9023
210	62.6844	10.0228	39.6401	32.3094
211	106.551	10.327	63.2749	41.4382
212	95.4635	17.0305	72.5954	22.6434
213	114.46	11.4895	54.7391	37.1908
214	65.8706	21.2698	32.5405	32.0885
215	73.5444	18.3405	33.3517	21.2473
216	81.1163	11.7213	41.3481	53.3727
217	76.5613	12.5453	70.4808	44.8126
218	75.1825	14.394	48.6467	19.4261
219	73.9887	9.65412	56.9623	36.0844
220	77.5463	14.676	47.9347	33.6765
221	81.5214	22.0329	36.3633	32.6095
222	69.3135	19.1662	37.6583	43.9696
223	80.4551	11.9291	32.3901	52.0312
224	67.2762	8.95555	40.4317	22.8098
225	31.6493	19.2312	49.8249	19.3859
226	103.963	15.1545	55.7876	24.6076
227	90.0299	13.0829	40.4744	10.8682
228	42.3112	11.6344	45.12	22.0278
229	87.0844	17.9756	53.3541	24.6143
230	45.6993	9.5548	41.0534	29.3027
231	48.9718	19.6032	20.1586	20.4758
232	97.146	8.6584	35.769	16.0709
233	44.1688	18.7357	37.6921	44.142
234	64.9734	16.6191	30.2591	30.6007
235	47.834	15.4678	25.7056	49.2319
236	57.3922	12.1152	57.8124	36.2874
237	80.5828	13.1988	28.7244	54.3714
238	60.9017	9.90252	48.1501	45.2012
239	68.6547	13.2181	45.2335	49.6623
240	70.1123	10.0867	27.2913	18.8058
241	105.881	14.9375	54.4233	11.1521
242	77.2336	13.208	66.026	29.1061
243	81.5225	14.3864	68.0015	39.7386
244	97.1126	15.5017	53.6936	30.1824
245	93.0451	16.4485	60.8126	14.8503
246	46.7961	17.6211	60.9356	29.0449
247	51.1532	14.0974	47.5107	30.6531
248	58.2382	16.6272	51.0043	15.3684
249	102.743	16.4993	27.9065	17.6842
250	70.3417	11.7415	51.5251	4.79021
251	93.492	14.8667	35.5724	18.9917
252	82.5642	11.0371	45.5175	14.5057
253	82.5387	10.7033	57.3121	25.8659
254	46.5381	13.5637	70.0635	14.0288
255	86.3353	13.7689	48.5405	31.5068
256	88.643	12.783	73.8046	11.7912
257	61.5829	17.3031	32.7032	17.6718
258	97.0703	18.6568	52.4455	46.2584
259	54.9271	9.72724	54.3948	35.223
260	68.6863	12.2881	38.1128	42.8465
261	59.3359	18.2101	20.5172	18.7017
262	85.8841	14.4499	28.6186	50.0325
263	94.5049	23.3825	66.1372	40.9697
264	91.3928	17.0237	47.2113	32.2897
265	59.5783	12.2685	59.0728	25.0063
266	112.562	15.3425	44.5569	48.1584
267	70.2532	14.6343	50.3526	31.1817
268	60.2586	12.4934	44.2238	31.988
269	59.5349	13.5371	40.7786	40.4728
270	44.9407	14.6755	47.5187	41.5523
271	48.9804	12.309	48.1265	33.4176
272	73.8524	11.4095	53.0178	27.7567
273	71.3996	14.1208	37.2876	59.6099
274	102.105	22.0024	39.9892	43.3437
275	56.0443	14.6534	52.7783	12.5946
276	67.3314	18.437	45.2116	25.008
277	83.2141	16.205	43.1908	46.6123
278	96.7071	15.7361	39.6674	20.5978
279	63.5519	11.8874	29.8061	29.1857
280	112.443	14.3987	47.8661	14.3749
281	40.4612	14.4058	58.0607	33.1737
282	82.2732	15.4812	35.124	16.8031
283	101.211	16.2012	63.4563	20.638
284	87.8479	23.2229	32.549	39.2786
285	133.525	17.823	54.9551	27.6655
286	66.7615	19.023	64.3338	47.6305
287	50.5328	21.2113	49.6847	7.93293
288	80.9082	12.7773	36.4756	28.0116
289	62.7386	19.9883	66.1109	11.7381
290	112.09	16.5735	64.8041	33.063
291	42.9721	12.6142	26.6491	21.3421
292	83.4732	11.6375	39.0958	35.8493
293	51.6801	15.5035	43.1762	29.0713
294	75.6485	14.3992	54.1884	27.0994
295	106.036	22.6389	40.9546	26.6817
296	52.8331	19.8497	25.9691	27.5068
297	99.9163	16.4934	42.5196	41.4343
298	77.6993	22.4218	37.2483	42.1482
299	53.1859	15.2405	59.3315	24.276
300	82.9909	15.6868	44.7222	38.2887
301	45.4831	12.5011	43.494	32.6371
302	87.4366	11.1229	43.1514	35.4145
303	77.2159	17.1644	41.2194	13.0196
304	118.806	20.2	53.0529	12.9937
305	82.8603	21.9218	39.0615	27.9589
306	110.137	13.3879	50.022	45.2231
307	45.426	15.2412	48.8504	59.5045
308	48.7536	17.6974	40.8365	4.22475
309	85.3581	12.3714	68.1962	23.967
310	66.3265	20.4645	46.3785	38.8306
311	58.4411	19.6268	49.612	28.472
312	45.4058	22.8117	44.4236	32.7295
313	47.9239	19.3002	43.1663	28.9819
314	73.3433	20.5592	55.1987	38.2496
315	74.7862	13.994	55.3357	28.9974
316	71.6721	16.0404	45.9533	45.8724
317	87.2155	12.3704	34.7305	43.59
318	58.1969	18.8112	52.5971	14.7549
319	43.6818	21.5056	47.8444	58.3742
320	67.0114	13.4762	47.52	30.9864
321	72.6052	9.53067	39.125	30.8255
322	61.5965	16.069	47.6266	8.07939
323	110.831	13.4868	38.4682	12.5472
324	84.4573	18.6584	37.913	32.4354
325	36.1631	14.0443	51.3275	33.3635
326	49.0629	19.2781	47.6704	39.5983
327	68.2242	18.954	43.9185	29.9191
328	74.1158	14.8428	43.4478	23.8616
329	63.2179	16.4804	47.2523	29.4002
330	63.3872	12.2097	57.8739	34.1438
331	101.375	13.9967	32.8621	33.43
332	58.965	17.2966	43.8686	30.3468
333	67.0242	13.1524	38.7484	24.3638
334	112.948	15.8162	47.8546	37.9739
335	103.923	11.5064	36.922	15.6123
336	48.7268	19.9312	50.9633	41.946
337	104.751	19.6575	60.743	41.6614
338	46.5956	24.7509	44.7438	22.7594
339	87.0102	15.8953	55.0199	33.3532
340	51.3566	19.9686	57.3834	29.2774
341	72.7463	20.1061	24.3014	31.3238
342	82.4452	15.0655	27.2017	16.205
343	57.4275	7.62313	49.7009	33.4328
344	64.274	12.657	48.751	13.1195
345	42.6175	21.4246	43.2238	37.4996
346	48.7206	23.0118	60.0798	33.6524
347	83.3943	22.3434	40.0617	32.1399
348	75.0953	15.3625	47.2562	27.4244
349	74.7538	11.199	52.554	27.7643
350	50.8376	16.5764	58.7273	6.90565
351	70.1258	17.5161	53.3937	17.7968
352	58.3885	14.1979	43.281	13.1897
353	116.882	24.4999	49.0726	39.0269
354	58.4905	13.1421	43.0181	26.6844
355	83.8897	14.1474	38.0922	42.0905
356	79.0858	7.57181	37.6555	19.3209
357	102.19	14.7168	46.4952	22.4555
358	46.4415	18.506	25.3065	32.941
359	86.5009	12.9726	44.1611	30.5967
360	92.795	18.2319	40.5464	32.3868
361	90.9817	16.4213	50.24	18.4271
362	75.4212	15.4457	43.5991	37.7306
363	96.3488	22.5378	41.3953	26.7525
364	95.8788	13.6735	37.5173	37.0557
365	51.8467	18.4064	38.871	20.1027
366	52.9503	16.2269	44.6206	46.5784
367	71.8086	16.769	52.8449	14.8708
368	49.1953	12.0111	41.9067	21.0612
369	87.9461	16.7484	68.3202	32.2007
370	60.486	16.1808	52.6064	39.5222
371	75.3019	13.5877	67.4778	30.6787
372	48.1419	14.9942	38.5433	60.965
373	112.389	15.0078	53.3439	59.121
374	91.6467	20.5665	50.1434	16.9883
375	38.6343	12.7184	35.7869	30.2926
376	54.9402	12.9874	68.4605	42.0727
377	64.2316	17.8976	46.2277	20.4825
378	76.4634	13.1212	35.8226	57.2447
379	41.8268	15.6422	48.0752	6.51592
380	79.4612	11.3237	62.338	16.4345
381	43.2281	17.7074	63.8294	38.2731
382	69.0879	12.163	55.2484	50.8508
383	91.0479	15.1224	42.4405	33.1695
384	101.451	12.6956	57.5564	40.6245
385	84.3467	20.4728	41.7069	35.1391
386	58.1208	10.1111	30.8712	18.2496
387	98.0816	10.8219	47.1291	27.6528
388	74.4929	10.435	74.1633	16.4681
389	71.1841	14.1333	40.456	21.8218
390	47.0913	17.5812	66.3253	51.9548
391	55.9655	20.19	38.3824	45.7885
392	56.3252	16.8415	58.7676	32.1332
393	106.224	17.0546	49.9695	10.4364
394	66.3979	20.162	46.9322	54.6309
395	38.5804	23.3708	52.9159	51.5181
396	89.4437	12.2328	58.9018	44.0241
397	58.0509	14.3459	59.1805	34.5608
398	94.6548	11.5079	28.9662	33.5485
399	76.6518	13.7062	56.3999	51.1765
400	114.977	9.14086	23.5726	24.8611
401	50.1791	21.2567	54.6226	38.1353
402	47.6373	16.1113	41.3494	37.4386
403	66.9128	13.7985	41.6944	36.0876
404	89.293	17.5943	38.7775	32.6809
405	70.9921	18.0601	27.3408	39.8608
406	67.3637	15.4941	35.066	22.2193
407	91.4589	11.2182	53.8322	44.385
408	26.0753	15.6421	29.9966	18.8473
409	78.0805	17.3209	38.2511	16.2295
410	79.9985	10.9207	34.6259	25.5225
411	61.9804	12.4771	51.9616	30.1753
412	89.5917	13.6895	36.8099	44.2969
413	52.622	19.1973	35.2518	25.1267
414	23.5517	21.7477	35.4305	27.9133
415	83.8247	12.8425	32.4102	39.2706
416	66.8289	11.3381	50.1533	37.879
417	46.216	14.8378	58.9867	23.4398
418	19.2332	14.345	41.132	17.4524
419	112.875	11.554	35.4457	19.0237
420	69.6825	12.804	49.3822	9.60068
421	75.0095	11.0864	50.3878	12.5662
422	62.5328	15.3257	80.2749	27.4344
423	67.0666	11.4733	40.314	27.8437
424	88.4528	10.368	49.4959	24.3638
425	96.3824	19.2053	28.0516	7.8576
426	102.641	13.096	54.664	26.7604
427	73.3547	18.0054	35.9499	29.9496
428	68.8472	15.5669	42.8857	25.4924
429	84.8912	14.0682	60.0426	38.7895
430	123.277	12.0469	47.0448	29.7818
431	41.1054	14.8025	53.3381	33.4055
432	89.5714	14.2837	62.0396	19.1356
433	124.208	12.2298	36.632	16.3374
434	99.0087	14.3551	42.2544	15.1223
435	62.1307	10.727	37.9614	26.6723
436	36.3645	14.9452	30.7983	42.0734
437	106.173	13.2154	36.7011	35.2959
438	51.6635	18.0498	64.0592	44.013
439	75.2374	19.7673	32.0126	14.456
440	122.411	14.9921	49.2824	35.0302
441	61.3235	18.3563	41.8131	48.669
442	54.2973	9.33586	42.0816	45.9376
443	76.2543	14.9638	35.9965	55.0932
444	110.595	17.6366	47.0754	14.1999
445	66.8699	12.9897	35.3189	5.78344
446	64.7804	14.4482	27.4028	51.7758
447	38.8745	22.9729	52.1028	26.1832
448	111.651	9.8866	60.4733	7.75678
449	74.4489	6.57554	46.1265	26.0995
450	59.4222	18.8702	50.5585	12.2828
451	117.447	15.602	33.0225	42.9671
452	58.1713	25.7802	69.1606	33.6898
453	59.7635	12.484	44.5099	36.2753
454	92.8372	16.002	31.0681	29.7465
455	73.1234	15.9607	35.5192	22.5847
456	63.5758	19.5114	40.4651	22.0976
457	69.9417	15.6653	41.6548	50.9492
458	48.0691	13.5987	46.6658	38.0832
459	43.2567	18.2125	56.9704	35.6791
460	114.121	13.1283	51.6363	32.4054
461	46.3354	16.7418	56.088	25.6939
462	77.3181	13.9299	49.2325	27.4759
463	117.714	13.3711	44.0242	17.6443
464	69.7609	10.7466	45.6066	32.6945
465	76.9491	17.7337	41.7823	40.4069
466	83.943	12.5421	31.5923	27.8532
467	72.5933	9.46196	31.603	16.8596
468	72.7039	23.5049	32.9233	28.1188
469	86.969	7.98961	50.6049	35.6159
470	86.9443	10.1968	45.6088	24.3397
471	84.0656	21.1352	46.6797	27.8785
472	107.314	17.5875	59.7582	29.3473
473	80.844	12.7549	37.2405	24.7787
474	88.5208	10.1849	39.5718	30.8068
475	58.1351	17.7007	54.787	39.46
476	73.3144	8.47105	43.5688	39.1463
477	42.6582	22.4857	38.3954	17.085
478	79.8018	17.4925	39.0153	37.9099
479	43.533	17.7739	36.486	20.13
480	53.8741	11.1929	49.11	34.6325
481	46.3736	21.373	36.7796	37.5916
482	69.523	14.5085	44.7564	46.4573
483	66.4575	14.1634	42.2217	49.2525
484	56.729	12.9001	49.0955	35.0952
485	32.875	12.5523	55.4909	63.6261
486	76.836	12.7137	32.517	21.0364
487	76.4777	15.39	32.6005	30.2864
488	46.1654	22.1611	55.9468	34.1715
489	66.8152	13.8334	68.8469	10.5651
490	80.3763	14.3886	54.4254	16.1662
491	61.6946	24.2201	46.8167	34.6501
492	76.7491	21.2875	58.1258	34.02
493	131.039	19.2159	64.9861	23.0422
494	72.2368	11.9201	35.8525	23.6082
495	74.5361	8.67842	63.1352	26.1276
496	78.3486	12.0569	50.2079	51.9937
497	99.5248	14.5297	35.59	24.0986
498	58.0916	14.071	42.6089	35.8446
499	68.2514	12.3526	61.5057	47.8334
500	69.1903	11.5471	40.6144	20.2619
501	65.692	13.3783	42.1777	6.01683
502	60.148	19.1525	49.8169	29.5531
503	66.7452	11.9776	40.0371	41.3773
504	76.3804	13.6363	39.0808	18.7126
505	95.5564	15.3354	47.1997	19.816
506	78.6604	15.0577	33.3041	16.473
507	112.11	11.3995	56.293	37.3672
508	69.4992	10.8803	62.5372	32.3949
509	79.2843	18.1047	38.4151	42.853
510	58.3816	16.9089	40.7091	31.6446
511	84.8354	20.9364	60.9006	46.4822
512	75.3872	20.2969	55.0259	17.4771
513	70.5951	15.8377	54.7957	26.2482
514	66.6515	10.4991	75.2618	42.108
515	104.469	25.125	41.3667	25.6942
516	106.612	15.6908	40.6206	29.4282
517	79.4976	10.2105	61.98	23.0616
518	63.6939	14.7072	41.0726	24.3964
519	80.3472	16.2052	33.9887	30.7841
520	63.6618	18.3409	23.0095	52.4042
521	37.7708	17.9641	48.2293	40.2404
522	113.228	21.66	68.6597	31.151
523	56.5724	23.4962	47.2739	46.5952
524	42.5289	17.7744	54.2974	24.0587
525	115.609	8.15778	55.3701	12.477
526	67.3475	20.708	39.4419	10.5315
527	66.2844	14.53	44.9218	25.8224
528	49.2126	13.3475	45.3172	26.8918
529	39.3486	18.3279	64.7843	13.8591
530	101.895	17.8509	56.4704	27.9761
531	58.022	19.1442	43.747	21.8641
532	54.1549	19.521	36.2678	24.7325
533	105.45	13.3778	26.803	45.7746
534	43.5236	14.7413	35.7052	24.4015
535	78.9705	19.7672	42.7069	40.3734
536	45.9009	18.0556	57.1807	26.4979
537	94.0664	14.4765	42.5952	12.4669
538	36.8125	11.3151	28.2108	24.6527
539	83.4946	13.1333	57.6306	38.6191
540	56.3411	14.2643	51.8853	14.0916
541	94.7938	26.0864	55.3136	24.8238
542	90.2622	14.4577	28.5538	22.4002
543	35.2274	18.6268	64.1028	16.0491
544	54.494	13.2511	43.3299	31.9767
545	79.1859	9.50497	37.145	43.2252
546	89.3635	17.8483	44.4817	25.8478
547	112.058	13.4191	38.0928	19.1752
548	48.4622	11.1872	57.5823	18.4232
549	39.5499	24.9279	57.7172	14.1171
550	86.6516	20.703	52.5982	15.9254
551	118.928	14.4621	47.8096	29.9251
552	65.378	22.4458	33.7238	30.3461
553	64.2463	11.2809	32.9419	36.052
554	80.8563	6.31274	49.7944	22.6033
555	99.1294	17.3073	67.6177	43.2524
556	72.9936	19.5679	50.9923	28.8311
557	98.6354	14.915	53.3147	32.7633
558	85.5757	15.3797	35.8822	40.0197
559	84.7617	22.8121	54.7501	24.972
560	66.5732	12.4798	28.8252	16.4669
561	62.2942	19.4944	49.9035	51.4144
562	69.3157	19.9401	50.0698	49.3588
563	86.6044	14.88	47.6219	20.5407
564	47.076	23.6579	36.5426	44.1185
565	76.6215	15.931	37.6876	30.6343
566	100.424	15.5635	36.474	30.1576
567	74.0291	10.2785	27.1235	9.94912
568	101.373	11.9886	40.819	40.1362
569	48.776	12.9334	30.0014	48.6153
570	88.7018	15.6859	40.1191	40.0385
571	95.3167	16.0332	50.0088	38.6545
572	60.1867	15.3326	40.9646	27.4806
573	67.1437	11.0855	43.8792	46.6593
574	89.049	17.7091	37.9143	34.6976
575	61.4216	10.2582	25.7656	15.9788
576	75.9575	16.9813	29.9223	24.901
577	77.6062	15.0538	62.5106	29.7976
578	58.6216	12.4915	41.6028	8.36642
579	69.3425	16.1156	36.9685	28.0434
580	73.7584	18.2557	51.875	20.4136
581	87.6672	16.5168	51.6462	38.5858
582	88.3271	19.7366	43.974	28.116
583	61.7327	18.1434	42.8737	43.4686
584	61.7082	9.15929	44.0964	31.5203
585	43.8115	15.4254	35.7013	35.0431
586	105.768	17.8001	51.1686	17.7941
587	90.8568	13.676	38.4382	12.1335
588	65.081	23.1949	51.8831	15.8791
589	61.508	9.58603	49.5956	30.7621
590	89.7228	20.14	32.7902	13.2186
591	55.4899	15.3003	50.1979	29.6871
592	62.1919	15.0104	34.1675	48.6011
593	62.8699	16.567	45.675	47.9163
594	75.843	15.8272	27.9321	25.7467
595	48.7637	14.7039	50.781	41.9432
596	35.0045	22.4957	51.8672	22.9813
597	64.3288	14.1895	45.96	36.844
598	88.6474	11.9716	42.781	26.2095
599	86.3397	17.4749	29.7312	35.3893
600	28.1248	15.6569	50.5944	40.9865
601	50.4254	17.1018	65.5727	18.1874
602	81.717	19.0017	56.0462	63.0114
603	54.7399	12.1664	43.2726	32.6074
604	76.726	24.8893	57.6043	27.6727
605	94.4686	9.66718	72.6016	38.061
606	95.0688	14.1271	46.589	24.3047
607	100.206	11.982	39.5742	27.2734
608	84.4048	19.143	58.4727	14.8012
609	78.6082	14.1932	42.9318	39.2838
610	22.3527	9.80875	50.7824	45.6539
611	44.2272	18.2778	43.8125	6.39612
612	89.2668	19.7984	69.3551	10.2713
613	98.7465	11.7023	53.9846	34.3887
614	72.3206	17.162	48.0256	25.8825
615	43.6694	19.1039	47.6085	27.0056
616	58.4642	18.1775	52.1286	25.1474
617	73.9654	21.5195	44.2974	29.3857
618	63.1094	8.97386	42.7702	30.0037
619	104.997	16.1979	42.7681	28.3676
620	72.9721	20.0366	54.129	46.3814
621	77.1739	14.6474	56.8501	30.2972
622	81.2465	20.9638	51.0357	31.555
623	41.3546	11.8204	34.1073	5.7462
624	55.7602	13.9763	34.8009	38.9063
625	94.7728	10.5243	35.5358	52.9092
626	86.7701	11.6801	71.3081	41.0216
627	80.1581	14.9339	52.3687	29.7581
628	62.0636	16.3478	31.149	25.054
629	31.714	21.0288	74.0634	25.5008
630	47.9073	14.6381	34.1169	42.8934
631	108.081	12.1059	36.9161	29.1015
632	108.243	23.854	39.8754	15.813
633	87.2087	6.59389	42.884	33.2791
634	53.1532	12.158	44.9684	33.4768
635	87.6476	6.81338	56.3312	30.8783
636	62.9678	16.511	47.8697	24.651
637	37.8579	12.9021	30.0246	20.2579
638	67.1848	15.9808	51.6907	29.5003
639	72.0584	19.1878	50.4247	37.0006
640	82.8898	18.8441	40.8436	16.5832
641	66.8675	17.3932	37.0496	20.0761
642	80.4065	20.1829	50.3973	16.9849
643	64.8826	13.6485	43.9494	23.1277
644	86.9382	12.5559	48.7057	36.8362
645	78.0762	11.2214	72.3276	25.5624
646	70.5738	15.241	50.6279	44.7054
647	71.4207	19.7937	50.6843	51.5445
648	59.0489	17.5338	53.2308	17.973
649	81.3305	20.3305	43.1473	38.2397
650	64.4828	15.9437	38.5657	38.0015
651	107.595	13.2006	48.3376	15.7373
652	36.5271	16.6082	34.5037	24.9941
653	91.8791	13.1127	41.1944	17.4762
654	76.579	17.7875	42.8117	31.9216
655	95.2874	15.9359	29.0075	17.2636
656	74.0314	15.5524	44.0056	30.2998
657	61.3323	19.2208	63.6324	14.9973
658	67.7118	6.84838	54.2199	20.6073
659	75.6321	14.66	42.6354	21.3683
660	46.6141	10.0454	42.9591	18.8811
661	79.5415	20.5814	48.9094	28.2524
662	68.5514	21.7272	41.2628	41.7525
663	82.5112	10.4053	27.7843	41.6341
664	72.9323	14.55	33.2262	14.1666
665	73.0715	13.295	67.59	20.9037
666	68.0221	22.261	40.6229	40.1314
667	40.2044	8.77267	57.5551	33.9601
668	78.8951	16.8688	67.3589	22.3972
669	107.685	10.9843	63.6432	38.8012
670	68.9752	22.2859	34.7478	37.6877
671	96.1102	21.4078	54.6753	31.9252
672	79.0319	11.5018	45.7566	48.6566
673	51.9663	17.9332	50.4326	34.3311
674	89.4381	16.4643	46.8061	26.9116
675	74.251	10.2665	56.7282	48.4291
676	96.3397	15.9919	49.6502	35.6336
677	70.3549	15.6706	50.5798	70.3717
678	73.7643	15.7631	40.0832	23.9499
679	46.8882	14.3827	58.4946	22.2268
680	78.5092	11.3057	30.0081	20.1547
681	56.487	10.7101	59.7103	45.4192
682	37.805	11.5416	44.1346	28.3773
683	42.198	14.0593	42.0122	30.0706
684	80.778	18.6113	40.0513	37.6187
685	36.0968	15.1077	50.1169	30.937
686	70.8167	8.14965	47.6613	47.6365
687	41.232	8.50665	38.9462	42.1736
688	69.8874	19.9473	47.2768	30.3828
689	53.8025	16.6948	45.758	19.5527
690	95.2492	19.6811	47.4212	15.854
691	22.2733	18.5657	54.3345	36.7027
692	87.0887	12.6371	40.5527	5.52068
693	54.7614	23.096	38.4255	28.0044
694	75.3669	14.8066	47.1065	33.9714
695	35.8855	22.3906	40.2208	39.2247
696	72.7057	10.118	42.1525	68.848
697	97.3974	11.1641	73.3977	11.1217
698	51.408	10.0018	60.9262	24.5128
699	77.9287	14.4249	48.0679	52.9727
700	107.083	18.4233	52.0941	28.1019
701	55.5421	10.6411	23.2552	15.558
702	75.3518	13.318	39.1972	24.2111
703	62.025	11.1166	46.2555	29.0146
704	74.8345	17.8547	48.2459	32.1853
705	74.6598	21.838	60.8078	39.7945
706	86.3613	15.9588	66.6982	15.6036
707	72.411	13.3265	51.5783	4.49604
708	92.7638	15.5677	60.072	25.7027
709	52.787	15.3754	68.9948	21.7851
710	63.6848	19.4309	59.9357	17.9829
711	102.61	14.5723	40.4917	25.2678
712	54.6691	11.9156	33.5248	29.2475
713	60.6536	19.2825	33.5453	30.2478
714	63.5612	15.122	64.9016	42.6269
715	53.22	15.6813	39.0099	38.1526
716	52.5675	18.3125	39.7875	46.5329
717	56.8862	11.0089	44.021	27.7231
718	52.9261	10.6321	38.7551	43.035
719	63.4784	16.047	52.9567	36.4353
720	62.6008	13.0773	48.8662	52.203
721	50.7627	10.8822	34.8447	14.2034
722	77.3154	18.2487	35.9005	14.0175
723	80.1176	17.9726	32.6992	47.4457
724	70.9133	14.6266	47.2961	18.3668
725	70.2402	16.5971	59.5186	43.1647
726	72.3658	13.5552	41.2566	36.4387
727	77.7973	14.7442	32.551	26.7378
728	83.9666	20.3933	58.7746	23.5662
729	88.9526	15.9389	42.7889	24.7681
730	47.2465	13.7584	48.2864	15.2665
731	120.929	14.6018	50.3001	24.5339
732	63.6391	16.8223	47.6186	26.7201
733	136.781	13.1659	53.1527	25.2093
734	104.744	14.3967	23.9012	52.2687
735	93.9211	16.7935	59.7115	19.6484
736	118.747	22.2718	57.7533	37.7367
737	60.0587	15.0945	37.2636	33.4988
738	65.0447	7.45331	35.9473	27.0828
739	52.9913	12.6374	52.7367	28.5915
740	62.6155	12.2833	59.054	5.17793
741	92.9447	14.4307	50.3084	17.0839
742	65.756	12.1949	63.1348	20.6233
743	78.3254	14.9071	59.8477	41.7474
744	75.2561	15.0022	48.3144	42.5372
745	70.5646	8.735	59.6559	36.7648
746	92.1002	15.1656	49.2045	9.38085
747	75.0852	13.9167	61.1831	28.8803
748	78.3222	15.3735	60.3295	35.4571
749	83.6688	12.884	47.6261	39.6627
750	61.1081	20.3868	59.5801	45.3966
751	109.464	11.4869	38.6016	46.4821
752	86.9009	16.3973	31.6088	34.1126
753	41.5469	13.5725	54.1872	12.8341
754	85.3216	18.8619	50.6413	11.2395
755	27.9434	13.8259	50.6482	6.55244
756	71.0508	11.8015	53.1948	16.0596
757	69.2246	19.0529	57.9413	30.9172
758	53.8707	19.5281	31.3448	8.78865
759	53.2718	15.9053	30.3944	43.8223
760	75.0315	10.2333	48.3893	39.4966
761	94.1956	14.6219	43.7053	25.6732
762	46.089	20.2164	49.2119	33.3061
763	49.6778	17.2726	53.9047	39.9759
764	111.639	13.32	51.2649	30.5268
765	77.7279	13.2145	40.5217	5.24557
766	44.2526	26.5838	58.2716	39.612
767	94.4501	20.8197	34.144	26.1057
768	118.758	13.3072	44.8783	22.5676
769	86.3024	17.1947	37.1005	7.28923
770	78.9648	18.7259	57.6221	28.6499
771	80.7559	25.3893	44.0592	15.0844
772	84.46	17.78	38.6556	37.2821
773	102.555	7.3752	40.6122	28.4721
774	61.5383	14.8704	49.7154	21.2387
775	39.2136	9.48221	33.5161	31.618
776	92.9318	21.5548	51.4786	19.4497
777	61.8144	15.5694	68.4318	25.7147
778	105.579	15.3132	53.904	15.84
779	77.854	22.5871	39.8142	58.6702
780	89.2388	12.4468	28.3512	43.4524
781	97.1643	7.69246	51.7355	17.3806
782	87.3384	15.7344	36.5111	15.627
783	78.5049	21.4459	43.5209	33.1375
784	27.1396	12.8636	51.3968	43.1446
785	60.6108	16.1599	57.2258	36.9031
786	27.7377	18.5172	42.831	49.1609
787	105.121	15.3996	71.5108	47.1486
788	108.702	19.5916	31.8306	30.6226
789	74.8264	10.7931	23.2852	21.2726
790	59.2101	16.7097	48.2264	34.6815
791	69.353	18.6727	53.1824	20.3506
792	102.523	10.4739	44.1827	40.8734
793	55.3067	9.97498	31.6741	22.5089
794	89.3387	23.2388	38.0007	14.7169
795	89.3094	17.8468	30.0549	36.1871
796	101.372	19.555	44.9337	32.5417
797	66.0466	11.9312	73.1914	7.18718
798	55.7296	14.7425	43.2446	43.0261
799	87.0366	7.7812	37.8691	31.5954
800	64.1602	14.8377	51.7994	31.3584
801	74.1148	17.8946	55.6817	41.2977
802	46.8457	20.2449	55.2533	38.5938
803	95.186	13.2454	53.4747	18.6943
804	39.22	16.3395	45.4352	34.8899
805	89.4602	11.1471	51.9798	19.0216
806	102.977	21.1292	42.3705	44.663
807	94.6189	11.8421	42.6994	19.9855
808	46.2827	29.083	43.6151	16.4965
809	73.4882	15.5282	31.1228	42.8703
810	61.2005	15.3262	42.4321	32.16
811	86.0548	18.5266	36.3392	31.0299
812	92.6356	19.243	41.6976	27.5242
813	65.1817	19.3066	50.2156	44.1411
814	55.3312	19.2774	39.0508	26.7095
815	88.4902	10.6854	44.9604	24.1931
816	86.8646	12.2387	42.6633	21.1069
817	55.0916	14.6842	38.7219	30.5098
818	95.4411	12.5432	54.721	19.142
819	69.9914	21.493	52.6408	48.3219
820	84.1265	21.0058	58.3759	30.6141
821	52.5075	27.5587	31.7184	23.2386
822	80.9949	16.0578	58.9819	6.66234
823	75.1067	18.7846	53.7458	9.76171
824	88.1105	16.0416	42.4915	29.957
825	81.022	14.1916	48.3788	50.8809
826	61.0948	16.5095	54.6427	22.0325
827	35.7465	17.9537	48.6952	31.0996
828	56.9596	12.5612	55.0488	33.6921
829	57.6594	17.7974	41.8885	31.6297
830	87.1886	16.1121	66.3479	28.4068
831	55.1066	23.5357	46.8876	31.6021
832	84.1936	13.5428	35.6561	32.8615
833	95.9353	12.8691	41.3621	25.0801
834	52.4808	20.602	34.3448	28.1707
835	75.1427	7.08271	31.4509	29.7044
836	112.208	13.3177	61.3583	26.2018
837	78.3132	18.8957	51.6934	41.8984
838	34.2935	11.9067	40.6767	24.1205
839	91.0683	17.3973	30.3591	59.0442
840	43.9598	16.4555	35.2013	43.2045
841	25.2268	19.7951	56.2954	5.60703
842	73.2533	17.8623	42.9759	54.1914
843	92.0757	15.8338	65.0889	27.2986
844	70.168	14.9276	39.0808	17.1117
845	66.2363	13.1835	28.5026	48.8044
846	86.1305	12.891	41.1333	37.9323
847	83.6551	15.8239	45.2732	52.485
848	63.3561	21.2054	52.129	30.1737
849	60.9349	16.1593	41.7561	47.5347
850	51.3468	19.1779	42.3885	49.0286
851	48.3394	9.28817	31.9288	14.3965
852	98.5651	15.3059	39.7774	37.0572
853	85.2082	9.41947	41.3731	17.3607
854	113.835	28.5472	57.9959	17.2237
855	80.1256	13.0848	42.3014	34.2096
856	57.7826	14.4677	43.46	34.7103
857	37.2	17.8301	52.4563	30.6464
858	65.029	12.5577	54.4984	24.8438
859	55.9609	7.38508	48.5156	34.3476
860	60.3727	10.458	51.7374	27.3234
861	113.436	14.0159	43.5183	21.1306
862	92.9115	10.4672	42.6864	38.1884
863	53.4437	15.1808	40.6369	27.2835
864	43.8829	14.0344	21.6465	25.7722
865	65.4697	14.3249	49.7951	36.1966
866	39.4649	15.1803	36.3385	44.6001
867	40.2393	24.0364	42.5795	29.8485
868	26.7183	8.71389	46.1424	15.7552
869	68.4042	12.983	55.8805	33.0131
870	39.8472	13.6218	66.3543	29.3655
871	80.9066	11.6294	57.5302	36.1463
872	81.4373	14.8812	47.2546	31.2333
873	74.4829	19.6877	49.8917	43.043
874	36.7624	8.87205	51.3986	30.3946
875	109.839	7.23244	23.2576	11.6948
876	95.7538	22.6171	54.0464	37.9274
877	64.8768	8.28612	50.6315	29.6527
878	58.4964	16.9409	37.4987	23.0288
879	80.2486	15.3915	60.4687	36.663
880	59.4081	7.24704	31.0189	40.9177
881	46.3671	12.6215	43.6578	14.7877
882	86.1839	12.6637	32.2801	18.0232
883	66.6008	7.51368	53.739	32.2555
884	67.1614	15.4935	36.4439	11.7931
885	82.6473	17.8023	56.2983	43.2746
886	76.3823	14.1264	61.1248	26.1862
887	108.106	18.8247	43.8528	9.36616
888	74.2432	15.7297	62.7415	30.2919
889	69.9236	6.90944	54.7448	14.6376
890	110.83	16.7557	66.4573	19.7336
891	111.498	24.275	66.255	15.4545
892	85.7712	14.3566	56.0946	28.8014
893	56.4595	15.3897	69.4112	46.2554
894	59.2072	14.7381	36.8234	23.1486
895	54.9966	17.8147	44.0133	42.9934
896	21.1244	23.2726	59.7498	53.4482
897	71.6168	13.8114	46.7197	41.6954
898	92.0179	20.8369	50.3747	33.1918
899	62.5889	10.2813	55.5066	37.3186
900	72.3858	12.1403	59.939	30.3932
901	55.8635	8.28934	49.2372	49.8498
902	63.336	17.7893	29.1749	40.2389
903	65.1324	9.22007	50.6891	47.2921
904	75.9645	8.86325	37.6693	42.183
905	49.4502	15.9297	44.8912	32.7843
906	95.2096	20.2165	46.0064	39.0103
907	81.414	16.9242	58.5637	45.8066
908	93.8628	16.8019	48.1262	57.9127
909	53.5253	22.9073	47.3024	25.0349
910	78.3101	16.6553	37.6492	34.9689
911	87.9393	6.24181	46.2624	26.2959
912	53.6333	11.5464	56.7398	20.6344
913	75.5926	18.3941	48.5251	6.74899
914	44.5832	14.6193	55.4146	42.8912
915	71.9859	20.374	64.024	23.7157
916	88.8586	14.8626	34.2247	9.93299
917	82.3523	16.265	47.732	37.507
918	44.391	8.22778	69.5492	46.4065
919	101.94	18.8655	59.166	48.7527
920	55.0791	23.332	38.216	21.3428
921	64.5637	17.8476	55.3182	33.0602
922	72.3771	19.7626	21.5965	25.4696
923	57.3058	19.6815	47.8787	24.9307
924	79.8357	21.4094	57.3014	19.4333
925	61.1414	14.9103	55.1619	42.9363
926	116.469	16.7052	21.1662	26.0173
927	50.1618	11.69	29.7784	41.6703
928	36.149	21.2597	30.982	37.1236
929	92.3555	16.0611	47.4977	26.3146
930	122.64	20.2772	43.1305	39.3444
931	53.4964	12.6184	42.0029	31.952
932	42.6307	9.65521	46.7303	22.997
933	76.9487	23.6792	34.9449	46.4067
934	59.0654	13.9314	56.5254	34.7895
935	50.7124	16.692	49.8813	45.7462
936	78.4476	22.1061	61.2544	31.48
937	73.3537	22.226	65.9195	29.0342
938	91.3895	11.1118	35.254	23.9108
939	45.2162	8.30268	41.4764	29.5636
940	85.1858	6.95282	38.741	29.1874
941	90.8652	21.667	46.4351	23.513
942	93.832	16.16	48.7148	23.735
943	63.1848	18.5109	36.6582	19.2057
944	89.9708	13.5543	57.9633	21.6376
945	95.8755	17.0949	50.9284	45.2119
946	94.8955	8.04452	45.5496	28.6783
947	66.6097	26.1326	35.1836	16.4978
948	68.4553	24.7037	36.5458	23.7173
949	64.9886	8.49957	45.9101	7.64921
950	76.9273	15.0256	45.6018	41.8529
951	42.0428	14.533	44.4865	36.383
952	72.4992	14.2944	30.1113	24.9344
953	57.7118	14.7565	41.178	36.2744
954	26.8715	19.2277	45.8367	38.6247
955	70.1619	20.1606	45.8047	30.9076
956	46.5119	12.0722	46.141	23.4595
957	83.2115	11.758	54.2658	17.8709
958	67.5322	13.7483	50.494	40.0571
959	92.0286	14.2705	21.9533	29.7527
960	80.9527	14.2594	53.5772	25.7272
961	44.3282	9.83504	49.4584	45.7241
962	56.5962	17.4257	41.8686	38.4857
963	84.2896	14.3275	67.8359	36.8666
964	84.2251	7.65494	40.8566	55.1544
965	51.355	9.97595	69.4074	36.2948
966	56.4877	15.6948	38.4404	36.7815
967	104.647	15.0557	47.9021	32.5134
968	49.0439	16.7565	20.2478	42.3085
969	92.1544	14.9106	35.3927	31.3645
970	66.6088	22.6131	37.686	53.8677
971	74.8087	14.6758	38.6673	37.0049
972	42.0312	18.276	56.4383	45.3007
973	55.2666	16.3885	55.226	36.1034
974	109.316	12.1858	44.2886	15.5707
975	94.2289	14.3223	53.915	44.4243
976	62.0386	6.79325	40.8568	39.9434
977	55.4948	17.4906	50.3733	27.0296
978	102.705	12.8541	64.0437	26.0906
979	84.8515	16.4425	34.8946	31.2116
980	49.6038	16.4624	37.7265	25.6583
981	96.5308	11.2469	45.3441	39.3605
982	65.6199	15.9676	64.2096	54.3887
983	57.4006	19.3893	54.9607	40.4925
984	108.937	13.6149	44.6886	20.5721
985	85.9947	12.5912	35.1433	43.3463
986	80.3512	11.6573	49.0695	9.41942
987	100.262	13.2797	58.2111	39.2994
988	70.3644	16.0706	49.8762	22.3395
989	94.7117	11.0455	52.4689	28.5951
990	54.6952	15.5721	50.6506	35.6103
991	118.231	18.6801	42.0349	48.551
992	66.69	11.7234	37.0848	8.42671
993	66.3964	16.8133	29.7049	29.3409
994	58.4138	17.4034	36.3417	31.6229
995	108.847	8.83004	52.699	46.2693
996	62.9305	19.8034	28.088	26.7007
997	83.7426	16.4338	46.573	14.3362
998	75.011	14.2903	37.7845	37.1404
999	77.8181	17.7673	38.8084	17.4677
1000	34.3285	14.7816	37.9411	13.1098
1001	78.7177	19.8721	65.162	35.1765
1002	102.574	23.6257	50.2577	31.1189
1003	84.2687	17.3679	50.8094	29.0737
1004	54.0466	15.9441	34.905	40.1688
1005	109.083	12.7962	36.3	19.811
1006	74.445	15.2327	24.8967	35.0347
1007	72.118	19.2768	53.069	40.3833
1008	75.6761	13.9223	80.4779	25.7871
1009	43.1117	14.3529	37.2369	49.9618
1010	90.7412	9.92369	56.9744	14.4783
1011	81.8208	20.1857	58.9876	29.8132
1012	52.0071	15.1176	56.4138	30.5113
1013	88.2017	24.8015	50.951	61.11
1014	72.7569	15.3235	38.6358	20.8158
1015	41.6997	12.0483	57.9486	20.8284
1016	118.19	8.33141	66.6796	22.5811
1017	109.433	8.52974	44.1433	34.4414
1018	84.4177	14.6938	54.2847	35.0752
1019	96.0442	16.5193	51.7259	48.0403
1020	50.1616	17.04	21.0061	43.5345
1021	101.505	22.2587	50.8723	28.9655
1022	84.2922	7.67977	28.7212	23.7836
1023	64.5777	20.0541	50.7566	40.9406
1024	46.2657	21.0505	55.4491	41.3187
1025	45.2563	10.0306	53.834	22.8461
1026	35.7604	17.7922	31.8269	22.5045
1027	53.5612	10.7547	39.3948	24.3875
1028	75.0105	19.5803	43.0749	44.9001
1029	60.7051	14.4341	41.4675	17.0584
1030	74.8042	22.974	31.5142	48.1133
1031	56.2455	22.0007	40.6048	16.3633
1032	64.9086	16.9976	34.2808	12.3828
1033	70.1647	19.8853	41.0945	26.2297
1034	56.3919	17.695	46.1425	48.2661
1035	76.8226	19.7592	55.2953	19.204
1036	87.4009	19.3254	49.9203	33.5327
1037	93.5551	17.6812	58.4665	31.5312
1038	68.1777	24.3253	24.3067	17.555
1039	78.1508	18.7233	68.6864	35.6177
1040	47.8209	7.96085	51.4176	7.59157
1041	101.455	15.4178	40.9434	29.3699
1042	81.639	11.4121	49.5311	36.4592
1043	102.28	21.0207	42.6734	11.0694
1044	52.4046	13.9364	42.4392	12.3269
1045	68.2555	7.41293	42.3604	21.0534
1046	87.3928	21.4261	45.9399	54.5933
1047	65.7462	16.9573	55.2475	41.0762
1048	108.123	8.13898	53.1925	25.8101
1049	65.2916	21.4077	32.2215	37.7312
1050	115.927	10.0853	48.9314	15.0914
1051	79.1929	12.0055	45.1068	21.3885
1052	60.2773	12.986	39.5782	53.0637
1053	88.4982	7.54073	52.0123	48.0865
1054	73.1296	11.2864	44.6681	28.9995
1055	90.569	22.1597	50.0148	42.301
1056	44.4312	21.6868	37.3051	37.5825
1057	88.1732	11.6577	56.03	44.156
1058	94.9363	17.1612	50.7564	12.1786
1059	61.3987	14.8835	65.3227	24.7315
1060	64.6999	13.1983	42.836	17.0296
1061	20.1989	15.6907	42.5105	32.4895
1062	84.3957	16.8559	54.5809	31.8499
1063	74.1048	9.9877	49.1529	23.2252
1064	102.398	15.8233	62.6936	48.6195
1065	65.7189	9.89168	45.5594	32.0712
1066	94.4195	21.9331	51.9898	20.9223
1067	54.8542	7.77688	58.5286	25.552
1068	54.5951	10.5959	48.4095	28.318
1069	69.4097	11.2925	45.8581	45.4719
1070	87.3242	15.2457	36.8063	20.0848
1071	87.8339	23.0485	46.506	23.3165
1072	85.3877	17.4381	57.7172	19.4189
1073	78.1503	15.8955	66.3643	47.5635
1074	66.3311	14.3667	61.5331	34.9611
1075	83.2387	12.7334	38.2375	11.2255
1076	74.5719	19.9796	44.7783	50.8503
1077	72.2808	12.2243	51.4902	21.7983
1078	111.707	8.83579	51.172	38.7672
1079	83.3334	24.9474	59.7894	55.9224
1080	82.0338	14.4762	55.0781	5.03535
1081	78.4041	18.2436	52.0832	47.9063
1082	47.4731	16.8966	60.0237	5.96233
1083	50.1428	21.1299	38.2604	34.6597
1084	67.8243	21.9928	66.5353	24.4044
1085	54.9908	13.9359	43.0821	28.2122
1086	41.9868	12.344	52.5573	42.7139
1087	66.9038	20.6661	42.0443	32.349
1088	72.42	6.33118	55.2211	43.4564
1089	50.5431	17.7517	33.2585	17.2462
1090	84.1422	11.773	42.4103	21.3751
1091	52.9484	18.125	36.8187	46.3677
1092	97.5027	18.5941	29.9538	34.4605
1093	102.911	10.7319	46.707	33.4767
1094	62.9575	11.6122	54.2592	56.5147
1095	52.3067	15.819	43.7869	8.02377
1096	51.4458	9.07094	57.9688	35.7951
1097	80.3243	17.2827	45.3654	13.4634
1098	97.3276	21.6715	26.9561	31.4829
1099	55.6619	20.7816	42.0195	20.7981
1100	76.8993	22.2673	28.723	38.7362
1101	58.3172	11.5753	49.4281	24.6337
1102	49.3611	8.78147	49.1458	37.2508
1103	41.9436	9.74304	37.8449	47.1395
1104	73.0596	6.78475	30.8272	36.6524
1105	64.3586	10.2633	34.8437	35.3542
1106	52.3106	18.9463	32.4612	26.5432
1107	76.0101	13.0359	55.4457	43.9339
1108	87.0892	6.1607	40.5282	30.6456
1109	80.9649	15.5014	69.8113	26.2532
1110	89.3887	12.6596	44.6089	44.1369
1111	88.5719	8.0346	29.2642	24.49
1112	91.1328	10.0289	49.9517	33.3853
1113	55.9358	12.2145	42.1671	27.141
1114	46.234	24.8786	31.5718	30.4238
1115	46.4255	12.4343	53.3993	30.8618
1116	73.3377	25.7955	67.9053	36.9605
1117	75.7804	12.6308	36.347	18.6612
1118	36.5819	15.201	54.0463	19.1749
1119	51.824	21.1696	42.5713	45.1169
1120	75.4991	14.9666	58.9797	19.6004
1121	78.4613	18.0763	30.2375	41.7923
1122	44.9844	11.0708	31.699	43.0466
1123	23.8875	18.4682	52.8504	20.3519
1124	76.076	16.1922	33.7206	34.0068
1125	76.7182	23.2053	59.6506	40.5479
1126	35.3308	18.7937	28.1616	38.8985
1127	115.268	19.2477	54.2083	30.2259
1128	69.2306	17.0361	56.5974	44.0885
1129	103.637	17.0552	52.5532	38.1711
1130	99.8636	11.6861	55.4716	26.4608
1131	80.2582	13.2071	53.1238	12.4428
1132	62.6584	12.1679	37.4482	8.68526
1133	64.435	16.8037	64.3954	32.1931
1134	102.967	17.5888	53.6437	27.6939
1135	93.5632	19.0947	32.907	28.1421
1136	79.1239	11.374	60.4122	28.5689
1137	93.5829	5.97075	35.6854	27.9401
1138	80.305	16.9391	48.5442	43.1167
1139	80.4382	24.4008	51.0701	26.7403
1140	110.201	16.0981	49.9704	37.0489
1141	75.6929	12.4464	39.6727	37.7288
1142	92.8704	18.3818	38.0423	47.1661
1143	66.7641	21.2114	42.1231	52.6195
1144	57.219	17.2364	45.9033	36.0353
1145	121.287	21.8928	42.5377	17.9578
1146	72.1902	23.1022	59.6686	13.0708
1147	82.859	19.1812	44.454	28.6628
1148	79.0288	7.2106	54.7213	28.888
1149	93.804	21.6618	56.4284	32.8767
1150	102.931	15.2524	64.0067	10.4681
1151	62.6554	10.9778	43.0748	26.4652
1152	71.0128	16.0646	25.013	26.364
1153	36.1521	13.8362	37.2356	20.3709
1154	79.0596	18.4088	30.8548	40.7261
1155	67.824	18.8707	66.4756	31.2362
1156	70.1012	12.1845	28.0991	9.4943
1157	94.6937	17.0175	44.4148	27.4924
1158	64.594	14.7127	38.5361	32.7091
1159	59.6159	16.8413	33.0237	51.2025
1160	70.4086	14.5727	60.9958	23.6772
1161	82.3669	13.8601	49.0825	43.6964
1162	50.9807	15.4751	49.2708	42.4107
1163	72.4812	22.8169	33.1073	47.7426
1164	80.023	17.4552	59.3086	21.7073
1165	57.2219	14.6668	29.3064	29.6696
1166	61.1154	10.2233	48.5577	24.3032
1167	101.589	12.8506	44.7232	55.4885
1168	65.0507	19.1791	46.7332	21.0666
1169	73.2219	23.2426	44.4806	27.7313
1170	60.4676	18.784	58.2718	51.8957
1171	77.4733	13.8915	57.7148	45.7213
1172	61.3522	20.424	50.3594	42.304
1173	83.2476	13.6023	48.9246	14.0076
1174	100.906	9.50526	41.5715	4.72573
1175	97.4263	11.5527	39.8038	37.3824
1176	63.7408	11.5411	40.0076	49.7044
1177	55.9144	11.4754	50.2832	17.4619
1178	50.2226	8.6687	37.7466	49.1793
1179	63.5456	6.92833	24.7034	37.9407
1180	79.7174	13.8259	54.648	34.0742
1181	93.6636	14.3089	64.421	30.1618
1182	62.1969	20.7238	63.8405	29.1231
1183	93.1778	14.2137	47.2682	29.5634
1184	75.3611	10.9665	49.8065	21.7011
1185	70.7423	9.04492	32.246	24.5036
1186	102.16	22.8836	33.9485	32.0507
1187	67.6642	28.6127	48.226	37.5227
1188	87.8605	17.6529	50.8445	26.4128
1189	63.2246	17.0404	20.4303	36.4204
1190	119.347	19.0169	44.7568	27.7652
1191	98.8657	10.1966	46.7539	17.056
1192	55.6055	22.3556	60.1513	44.9178
1193	81.7796	18.7146	37.6299	36.8643
1194	104.549	28.609	49.2874	28.6633
1195	60.6455	14.465	34.2623	42.3413
1196	64.6796	18.3182	59.1622	42.4695
1197	39.6865	17.9974	60.1252	20.6459
1198	112.795	12.4795	54.0458	24.736
1199	85.9428	21.9586	33.7091	22.7634
1200	101.831	16.7426	51.2552	18.2233
1201	113.872	15.2346	34.4621	37.2703
1202	75.0435	11.7105	58.7479	16.6274
1203	107.37	14.4921	39.316	11.365
1204	105.857	13.9032	60.4557	8.68494
1205	87.4182	22.0281	43.9534	4.09751
1206	64.1322	19.0339	34.733	19.6411
1207	107.416	20.338	48.9567	14.8653
1208	87.805	7.83062	42.5457	47.8534
1209	32.4785	11.2157	42.3626	14.6633
1210	62.6837	10.8885	32.0871	14.4011
1211	118.63	15.5173	43.0434	31.4457
1212	105.807	24.0407	37.4786	31.5528
1213	84.3319	16.4992	60.8017	22.0094
1214	81.8624	18.7858	44.2438	35.3796
1215	76.1381	19.8093	36.3705	39.5837
1216	60.5232	17.6701	54.8796	42.6729
1217	98.9148	18.8375	35.2674	58.5663
1218	91.377	12.7389	32.6973	28.1843
1219	76.7504	19.3127	45.014	44.6156
1220	112.948	17.3257	26.9808	50.6718
1221	77.0929	16.711	30.4031	28.1238
1222	78.4519	14.1863	43.7536	33.5746
1223	86.6823	11.8949	45.4237	9.72534
1224	100.149	17.5505	48.4775	31.5658
1225	49.8307	19.9675	47.5469	30.2641
1226	108.128	17.7744	46.2934	25.323
1227	75.6124	18.5075	68.2941	24.6559
1228	88.1143	22.5593	35.6571	31.3871
1229	93.7928	19.2391	50.989	20.1949
1230	85.5016	18.7894	31.5245	16.9026
1231	73.0578	21.8	41.3197	31.5755
1232	45.8348	19.5679	55.0748	12.1772
1233	57.2474	17.072	64.7957	53.2706
1234	78.272	16.4607	39.1818	37.6664
1235	63.4801	15.8145	37.4392	39.4512
1236	87.5436	20.8941	49.2177	29.97
1237	57.195	18.8058	34.8742	30.0198
1238	73.3939	13.9323	42.029	17.8317
1239	32.5529	16.6601	46.6596	25.0952
1240	86.1147	26.5106	32.1734	28.967
1241	107.375	20.2123	41.0305	37.3185
1242	80.1737	16.5124	64.9183	34.3551
1243	93.9334	14.6339	42.4711	39.6409
1244	64.1132	12.5129	75.387	42.3216
1245	84.9445	19.3127	52.7024	42.4518
1246	66.4263	23.6808	58.6954	36.348
1247	56.0807	15.9211	35.8233	49.0956
1248	50.6051	30.1296	37.0287	39.0265
1249	50.8778	18.8738	58.1039	23.9075
1250	70.0281	15.3394	36.2507	13.8354
1251	108.102	18.1538	48.5239	43.6923
1252	110.6	20.0988	70.5205	33.7758
1253	50.1161	11.195	46.0382	39.5555
1254	87.5921	13.831	38.9383	40.4345
1255	121.38	15.4118	60.0173	40.115
1256	78.9062	18.7731	23.6453	40.1092
1257	82.0976	17.7538	37.737	28.8615
1258	36.6631	17.5716	32.0926	32.5296
1259	83.3123	16.3788	70.8201	27.5835
1260	57.0184	20.4897	45.0214	18.4663
1261	81.7394	20.1911	40.0803	20.8247
1262	72.9407	12.1483	39.8736	32.1633
1263	85.2179	8.65791	49.1256	26.5705
1264	57.8454	18.9535	56.9851	51.0182
1265	36.336	8.85646	29.9673	4.70585
1266	86.8792	17.3652	49.4304	40.3069
1267	67.3323	20.1076	54.7111	27.3182
1268	77.1591	16.3474	29.5046	25.3878
1269	75.2697	16.3961	48.9374	26.4799
1270	93.1467	20.2777	51.6446	33.2577
1271	108.301	13.915	54.5718	38.7576
1272	71.5578	24.2678	47.3252	42.4665
1273	59.7338	17.7688	41.4725	45.7703
1274	20.3074	8.21372	55.3714	16.0555
1275	102.592	22.0485	51.8071	18.1424
1276	93.2154	13.8344	34.9518	37.3623
1277	68.9569	20.0672	24.9948	27.3462
1278	90.9581	18.796	45.0596	37.951
1279	46.6303	9.23101	59.9071	31.5537
1280	87.2185	13.3904	30.6952	30.2674
1281	70.0964	18.0625	49.8106	56.8226
1282	107.796	17.9791	45.8019	16.0371
1283	79.8008	17.2465	65.0407	17.2589
1284	79.4645	18.383	52.8358	50.4802
1285	31.6151	12.0017	42.1975	51.3031
1286	70.2083	20.6257	61.1665	17.325
1287	88.048	17.3324	53.0565	26.853
1288	41.8291	18.0668	53.2707	14.005
1289	45.3276	16.1058	52.5409	46.7679
1290	77.2244	15.5149	78.3086	51.0252
1291	41.3171	14.4844	40.9437	4.18197
1292	78.6689	7.47758	35.7034	43.6374
1293	46.3714	14.4417	51.5686	41.4181
1294	40.6305	13.1318	65.9756	26.9453
1295	70.4415	9.44431	65.6799	30.3902
1296	36.3749	19.1399	53.7559	38.8197
1297	78.5824	14.2797	41.7556	49.8367
1298	63.7042	16.5892	55.2053	39.8014
1299	79.1591	16.8615	44.0041	60.9002
1300	99.9842	14.1842	47.9622	29.642
1301	107.086	21.4857	38.3188	49.8071
1302	60.426	21.6112	41.5234	32.2216
1303	104.162	18.4914	60.1402	12.8053
1304	58.0536	15.5063	50.4239	52.8128
1305	60.9849	14.6324	65.4063	13.337
1306	50.068	16.0582	54.5394	23.9589
1307	83.2145	16.4059	27.2911	34.1334
1308	72.2019	7.05093	39.0282	27.2692
1309	44.4734	17.4241	40.0957	42.4587
1310	68.1903	6.5239	44.9597	40.5819
1311	69.7794	15.1065	58.1767	40.1122
1312	55.8869	10.9667	64.1593	21.7323
1313	29.234	16.6389	42.3183	41.417
1314	49.1295	8.67134	34.2012	61.183
1315	74.1218	23.1907	40.2609	22.8687
1316	69.5674	11.2185	76.379	28.2939
1317	72.8186	16.2912	42.1754	47.7023
1318	70.8747	17.2844	44.1125	7.84783
1319	73.2041	18.2288	58.4363	10.588
1320	90.1209	10.2774	36.0484	35.8997
1321	59.1147	18.8242	39.3296	35.3732
1322	92.5873	20.4464	20.6366	35.149
1323	73.5545	24.6861	38.3157	26.829
1324	57.3789	13.1554	25.7187	9.98051
1325	72.9275	10.0088	27.0393	45.7848
1326	73.2454	16.7881	39.8454	21.672
1327	72.8056	20.5029	30.2603	28.9489
1328	63.1944	10.5157	36.7055	29.8038
1329	60.7154	14.0523	43.4038	27.3925
1330	53.3902	23.19	30.3999	25.8082
1331	82.693	18.557	37.3616	35.3102
1332	93.2726	13.507	49.721	21.8574
1333	112.718	15.9878	41.8416	21.2337
1334	87.5515	12.0492	44.0354	43.6581
1335	72.313	12.574	55.0604	35.3944
1336	86.8773	19.6037	45.3347	39.511
1337	45.1417	20.6122	33.0824	34.5138
1338	63.485	24.252	50.0036	43.4402
1339	81.8625	12.8837	33.5055	26.4242
1340	64.1097	19.1572	35.5259	41.354
1341	75.0179	20.5488	36.7524	19.5243
1342	63.9267	6.53815	38.4391	36.2789
1343	48.8554	22.5788	59.5452	50.9039
1344	51.4563	17.7649	43.3375	25.2886
1345	64.8292	12.9141	41.2167	34.6858
1346	68.1045	14.9596	29.9652	51.4362
1347	48.0545	16.92	60.0715	40.6588
1348	112.974	11.7804	30.9126	32.0141
1349	99.7227	10.2663	46.0971	11.6848
1350	69.8869	16.1604	34.9142	30.1941
1351	43.9505	22.5783	39.2011	33.1539
1352	88.6818	12.968	43.2609	50.8243
1353	85.2051	17.2891	64.3782	36.6819
1354	77.4172	21.5541	56.0897	27.8123
1355	86.736	19.1952	43.0277	21.6011
1356	94.2734	10.1197	54.5819	21.7545
1357	82.1726	13.8282	34.3053	16.4938
1358	55.7214	13.5241	48.06	12.6656
1359	27.0629	13.0062	58.9027	44.589
1360	84.0174	10.6999	59.1468	27.0008
1361	93.4004	26.4694	58.2755	15
1362	135.382	20.9635	38.1641	9.52438
1363	49.1498	19.771	47.7	49.9402
1364	46.4651	8.23489	49.877	34.5358
1365	74.2124	16.4535	28.1519	35.3695
1366	92.2125	21.0581	59.5494	19.2141
1367	76.2999	16.5044	30.9242	15.5444
1368	90.5188	12.1696	44.6981	25.4156
1369	64.2913	25.5903	32.3779	40.569
1370	101.281	19.2263	48.6203	62.4278
1371	87.4747	13.0253	37.2787	51.0287
1372	75.3091	9.07117	47.4191	16.4318
1373	93.398	10.4261	67.7407	26.4931
1374	87.9027	15.6388	49.3533	26.7074
1375	50.3438	13.1996	45.9755	18.7317
1376	88.4044	20.5712	60.884	49.0341
1377	87.8841	12.184	23.686	19.0421
1378	73.0628	20.0919	58.0472	50.8267
1379	78.67	15.382	41.1768	30.7476
1380	47.8421	15.6757	53.2793	16.3072
1381	48.9947	12.7914	40.3095	14.0497
1382	71.204	20.1039	34.4509	17.764
1383	86.6425	22.8465	42.8435	7.87629
1384	77.5121	11.55	46.7845	22.3145
1385	56.8414	15.5232	32.1559	22.4096
1386	55.7997	19.55	49.2675	35.7712
1387	68.4422	8.09855	48.134	52.0168
1388	62.9395	13.6038	75.3629	18.9113
1389	75.1383	14.2866	66.9831	13.9105
1390	76.3745	13.1116	48.2519	30.2416
1391	90.7298	14.6228	27.1298	42.2685
1392	90.7953	16.9054	31.985	50.9149
1393	92.9432	17.8544	50.6501	20.5644
1394	76.9421	9.73047	50.3324	41.4937
1395	56.3854	21.5004	37.1856	28.2511
1396	82.8343	23.4496	31.141	48.435
1397	40.4657	14.2922	37.3927	31.0724
1398	76.4335	12.8847	51.0085	15.308
1399	64.5943	17.0212	53.6703	38.9594
1400	103.356	16.0694	43.8715	36.1232
1401	75.2319	18.2766	64.6322	19.6325
1402	45.2737	10.3162	53.3783	10.6626
1403	37.6648	22.7196	47.4217	15.0946
1404	84.73	19.2867	56.6273	11.6658
1405	87.579	11.365	42.064	32.5757
1406	19.5661	11.6411	36.8481	33.5819
1407	70.183	15.2494	54.7824	51.8728
1408	72.0527	14.2005	38.7809	16.1616
1409	69.3562	15.5434	38.6846	25.4942
1410	63.58	13.0053	51.1218	48.0533
1411	40.7329	20.3579	32.4646	49.8539
1412	56.9009	23.9077	36.7873	33.5492
1413	81.8828	17.6174	42.8918	27.502
1414	69.9354	25.1712	51.4212	15.9554
1415	96.7968	14.6775	48.3349	8.49132
1416	74.6211	14.4567	60.755	31.0262
1417	103.239	20.9218	57.8093	40.4654
1418	123.547	12.1939	41.6499	45.0626
1419	54.6466	14.4322	49.7527	48.3456
1420	84.354	13.1367	25.437	36.199
1421	87.4631	14.6622	32.5745	24.6719
1422	70.1254	18.868	67.301	26.5167
1423	84.9495	23.0584	54.7717	14.1526
1424	67.8917	16.9894	51.5454	42.9534
1425	100.311	9.13672	57.4404	9.55633
1426	80.7588	11.4553	53.3423	52.8098
1427	57.5366	15.3487	55.631	19.7869
1428	77.9457	16.7204	36.1695	6.59659
1429	63.9041	21.2825	61.7825	22.7171
1430	78.7987	13.6573	33.0108	23.0347
1431	103.458	17.339	52.4247	19.482
1432	68.3214	17.9979	33.4748	28.4459
1433	63.3089	10.788	45.5692	32.3649
1434	81.3303	13.4541	56.9375	19.6028
1435	44.2217	14.0667	55.0816	22.4192
1436	62.366	17.3821	41.4065	34.0596
1437	64.4677	14.1332	64.1258	39.2304
1438	62.689	15.3932	56.1558	41.7958
1439	66.7039	19.4508	47.1671	42.9087
1440	112.34	14.7274	60.7032	24.7653
1441	49.0878	13.9807	63.3336	48.7948
1442	68.5134	14.6841	39.3652	32.7897
1443	82.2597	13.8668	53.4865	35.1917
1444	60.036	12.3823	33.7413	31.4808
1445	83.2163	10.7366	41.7707	26.3734
1446	119.315	17.8525	30.4186	8.77864
1447	83.2939	14.6683	49.7255	28.4694
1448	76.7561	17.2878	47.072	20.8003
1449	64.2015	17.5514	42.0073	22.5433
1450	87.0712	11.7336	58.5012	36.6504
1451	93.7075	22.6864	59.9171	17.3448
1452	57.2567	19.5623	37.954	29.4882
1453	61.79	16.8727	27.8591	33.6764
1454	67.3458	8.45368	54.0626	32.6141
1455	72.7223	7.35775	39.3723	47.6687
1456	25.663	9.85708	45.4197	25.7085
1457	98.7303	12.946	59.2525	34.3115
1458	98.0984	7.86981	48.6223	37.1267
1459	54.0958	16.8895	47.3493	17.4421
1460	61.1696	14.8735	62.8329	35.3784
1461	111.339	27.5167	59.5846	18.7734
1462	79.2602	19.2426	45.1109	39.3836
1463	107.61	16.8354	58.6767	22.7489
1464	82.6806	8.39342	56.7063	36.5078
1465	83.5814	13.4563	42.2876	24.4317
1466	63.3395	11.1039	53.934	35.4087
1467	55.2287	17.5549	24.1495	53.4392
1468	71.0451	17.4923	75.3033	28.955
1469	40.2503	21.398	43.8658	56.4303
1470	61.2471	8.86205	47.5688	45.7437
1471	97.7955	16.9459	42.6121	22.967
1472	68.7781	11.1772	40.7719	47.7333
1473	61.9514	12.6014	30.7883	39.1489
1474	77.222	12.7775	57.3515	27.2702
1475	59.7564	17.3026	47.8642	46.9156
1476	106.623	13.6541	52.9278	54.5864
1477	65.0589	15.6038	34.6416	18.3216
1478	80.1629	15.2198	35.9382	31.2161
1479	65.3062	22.3334	26.8989	29.4565
1480	58.0103	14.4907	45.8642	38.4111
1481	90.4937	22.3917	52.9763	42.8364
1482	63.2894	6.8955	46.2138	31.9877
1483	63.3947	21.3236	47.2919	39.8751
1484	97.7687	20.5791	34.6509	34.9653
1485	67.6837	9.72456	34.3399	40.5927
1486	92.3101	16.3691	66.1524	33.7525
1487	55.4279	7.61982	63.7283	31.7045
1488	69.7168	15.6584	40.9601	23.2553
1489	91.618	6.55495	37.6594	28.5436
1490	107.757	23.4829	49.7143	46.7945
1491	92.7814	18.6757	38.3747	23.8877
1492	49.574	16.3638	50.7472	37.6611
1493	44.6715	11.5809	48.2564	43.8292
1494	59.626	10.9746	44.7354	18.4107
1495	98.7018	10.7904	40.3819	26.134
1496	54.1888	17.1094	55.6706	24.7441
1497	60.2728	18.6696	47.6697	51.6662
1498	104.147	15.2255	53.9334	31.7467
1499	93.4403	23.3347	64.8466	22.4868
1500	43.9438	12.2089	33.9387	44.1193
1501	102.354	8.03759	33.1055	42.3259
1502	72.7616	8.1666	27.5186	30.9919
1503	63.2076	10.7862	38.362	37.5375
1504	76.5988	10.8834	41.0553	28.6041
1505	89.5209	17.8419	45.8034	45.678
1506	97.6443	13.4628	31.9112	39.4175
1507	62.6517	22.879	47.2901	39.5037
1508	79.0886	14.7986	38.7163	25.9293
1509	106.343	15.7514	32.2448	38.5861
1510	49.8285	22.4125	64.2838	21.9659
1511	116.169	19.8063	43.5731	35.3405
1512	70.7749	13.8634	29.7169	19.3452
1513	83.5022	17.0262	51.7065	23.7887
1514	83.9141	19.4039	57.0562	16.3673
1515	85.1589	15.5952	51.7649	45.1802
1516	78.8772	15.0399	35.1293	37.3659
1517	77.3498	14.0004	35.9977	34.6808
1518	47.4092	9.06323	39.838	42.6587
1519	55.4855	23.2253	44.9015	20.5444
1520	90.395	15.7509	35.9282	11.614
1521	68.464	13.6313	56.0424	19.462
1522	61.1883	11.4095	31.1171	16.0124
1523	67.5192	14.4629	27.5943	34.0024
1524	124.308	16.4406	23.9719	30.0277
1525	58.4685	14.2098	21.571	31.3802
1526	63.3423	18.9384	38.5036	43.6437
1527	70.5704	13.473	26.8938	26.8604
1528	69.9617	21.8964	56.6819	33.3919
1529	66.5224	16.7864	46.1692	32.9855
1530	77.8487	18.6722	26.8276	23.5931
1531	91.6812	14.8196	39.1937	4.77367
1532	81.6882	9.06844	71.0155	20.3324
1533	65.2271	13.7927	38.1117	29.2834
1534	83.3665	13.0081	70.7058	41.7728
1535	46.5615	18.1101	56.5282	21.8091
1536	64.4504	20.1658	34.0282	25.8319
1537	126.03	11.917	44.1067	31.7676
1538	71.5597	19.2326	57.3739	19.183
1539	62.3699	14.1078	22.9114	13.8899
1540	73.9678	12.4237	36.5998	26.6327
1541	62.1421	7.69165	46.9687	29.2242
1542	42.5838	21.7976	49.9559	22.9701
1543	77.6256	21.3578	44.536	40.0357
1544	67.4443	16.408	40.1587	42.5743
1545	80.4444	22.6618	38.369	14.7651
1546	97.071	16.4427	50.0457	24.1879
1547	64.3379	22.8826	59.1771	29.6872
1548	64.5225	20.1784	47.9463	30.3211
1549	57.7466	16.099	47.9792	28.1034
1550	104.923	14.0943	52.9214	23.1534
1551	82.0169	16.5684	30.0541	30.3838
1552	66.2202	15.1195	49.0573	37.4875
1553	76.4698	16.9356	38.6285	34.9527
1554	66.5489	16.7317	37.1223	24.0801
1555	45.1492	18.0175	43.4409	28.9067
1556	83.7344	8.07223	39.4103	25.6374
1557	87.288	22.1564	55.4394	34.5809
1558	79.1999	13.7209	52.6342	33.2955
1559	90.8557	20.9549	32.9633	32.4451
1560	76.2841	18.8499	34.6932	35.7716
1561	98.643	11.3837	28.6273	38.7173
1562	73.7242	20.7343	43.9358	33.0978
1563	70.5036	23.0802	52.8059	25.4444
1564	74.7286	25.7771	28.222	22.4403
1565	62.3613	13.6432	35.8101	33.8556
1566	58.347	18.0383	54.9182	52.1669
1567	40.4777	26.8563	66.8314	30.4854
1568	66.7588	14.0986	26.5541	45.2262
1569	81.6369	16.7518	47.2209	14.0087
1570	57.2332	16.8968	45.3177	34.025
1571	95.5042	13.7551	57.7611	11.4501
1572	51.7328	19.5991	43.972	34.164
1573	87.2338	14.7982	54.2558	22.8435
1574	48.0407	16.9314	44.5376	38.8164
1575	59.316	16.545	49.7811	20.9437
1576	50.0404	14.962	55.0159	39.2254
1577	82.9896	15.9953	53.0454	31.2562
1578	94.265	25.1135	60.1809	40.342
1579	37.8587	16.0666	56.1552	29.9051
1580	97.6876	17.6421	62.6599	44.0037
1581	91.8969	20.7193	48.0201	30.0988
1582	73.7632	12.2407	38.2993	27.5077
1583	52.4074	13.2241	34.3544	33.4845
1584	46.7687	10.5988	62.1352	37.5246
1585	86.1089	17.2349	50.7088	6.17272
1586	77.6094	10.5403	36.8018	30.9304
1587	96.3102	11.7038	50.3999	31.9843
1588	104.435	18.4476	30.2985	26.9183
1589	60.4861	13.2652	49.793	20.5596
1590	84.4907	18.1272	52.4389	24.4172
1591	76.6658	19.5975	47.7778	32.713
1592	77.0086	16.8215	69.5531	18.602
1593	77.4689	16.421	41.9173	28.2837
1594	89.4408	12.1765	65.5918	20.4666
1595	34.2059	24.1454	42.856	18.7291
1596	78.8802	10.8168	43.894	33.1264
1597	113.413	14.391	69.0747	24.3554
1598	113.082	11.8466	42.4015	44.3691
1599	56.8067	18.8271	60.0952	11.0411
1600	91.965	15.5278	45.7824	7.83631
1601	120.623	20.606	52.1262	35.7452
1602	67.9992	17.577	38.6064	26.3401
1603	73.3786	8.80247	37.4414	20.3237
1604	40.6525	15.516	60.3235	33.8753
1605	90.9556	17.277	52.5519	32.6717
1606	98.0638	18.9405	46.3572	49.507
1607	91.9879	11.2883	62.1852	14.3441
1608	72.3168	26.6065	32.052	42.367
1609	74.8029	11.7132	52.5887	32.7216
1610	96.0738	20.7491	29.5993	34.9856
1611	71.8205	18.1329	49.805	35.0585
1612	91.7841	17.8357	26.7779	18.3684
1613	81.4889	13.5026	57.6787	43.9104
1614	68.0105	16.9699	45.7177	33.5791
1615	69.0306	9.59542	52.47	20.9823
1616	18.7457	14.7596	56.2014	44.5309
1617	66.9236	14.333	54.5705	36.503
1618	44.1679	8.75726	50.7544	31.2205
1619	64.147	13.1559	39.0516	12.869
1620	101.541	14.2104	34.5448	10.1496
1621	33.3467	7.06188	41.9836	42.6897
1622	78.2326	17.3497	57.0843	36.585
1623	71.4056	23.3317	41.8448	12.3108
1624	95.3265	18.2282	51.4775	29.7483
1625	79.6078	15.8758	32.5814	44.1241
1626	80.6297	11.2351	41.1524	4.38197
1627	47.3417	13.1829	45.0509	24.2909
1628	66.1105	13.1063	43.9279	42.6174
1629	88.6073	14.6223	45.7686	33.5162
1630	97.1631	11.7432	32.8067	6.84274
1631	116.454	9.45992	27.1785	36.7376
1632	89.8225	13.614	48.6525	30.4053
1633	62.7668	10.1124	38.4501	38.1235
1634	54.5114	23.6281	46.7979	37.8541
1635	28.7734	13.9984	76.1127	32.225
1636	44.4797	17.7733	49.9312	14.6576
1637	68.0888	12.9805	43.7324	21.0714
1638	93.3602	22.1893	33.4829	27.5977
1639	72.6942	14.4871	44.5907	28.9728
1640	80.2226	14.9358	38.8169	29.8063
1641	67.2953	19.9721	38.877	21.5077
1642	50.977	19.7261	54.5775	31.8692
1643	100.573	18.6447	56.1127	20.1637
1644	106.459	23.5297	44.1235	41.0515
1645	100.464	21.916	40.2174	20.9603
1646	98.9337	16.8427	46.8085	46.9583
1647	109.655	11.3824	52.7541	43.0107
1648	92.0266	19.9475	41.7744	28.89
1649	88.3337	23.1811	40.3954	43.9814
1650	103.549	15.8241	52.9632	30.075
1651	81.5088	18.4323	29.9836	37.9552
1652	61.4055	21.5036	45.4909	9.96794
1653	45.9132	16.7047	40.0865	16.9346
1654	69.6587	6.75345	66.0533	31.8018
1655	57.4085	17.9204	23.3869	27.8511
1656	85.3436	12.8489	46.6544	28.5979
1657	61.6982	18.8145	47.3211	19.7873
1658	99.1356	20.3551	27.4842	32.9364
1659	54.4908	16.7484	64.6534	37.1785
1660	78.4519	13.1113	44.1214	40.5331
1661	112.993	16.7812	47.8654	29.9143
1662	103.124	23.8759	30.4144	25.9331
1663	59.5842	12.259	46.05	36.3396
1664	88.3327	16.2619	43.8072	29.8748
1665	108.633	15.9966	33.1065	37.3131
1666	70.7517	16.657	42.9079	43.8412
1667	69.7465	17.1113	48.2285	35.4105
1668	57.4201	21.8611	64.5967	17.0377
1669	65.3354	12.0219	38.4481	41.6392
1670	84.5438	11.8014	47.6762	26.1904
1671	110.236	9.0167	40.6883	20.2966
1672	64.1727	15.16	52.4066	33.711
1673	77.6685	16.2841	36.8889	11.7613
1674	73.9197	14.6231	42.1856	23.4295
1675	45.0638	10.3536	32.7987	33.9812
1676	75.2514	17.7338	29.0651	20.9333
1677	85.6027	15.8667	51.2538	20.6085
1678	73.9223	7.65948	49.2729	19.5581
1679	72.8186	17.1764	45.4901	44.4768
1680	88.7124	8.06936	58.3074	16.8897
1681	46.2929	23.3563	47.4665	13.8638
1682	68.568	18.9823	32.17	34.4625
1683	61.4756	18.6011	49.0133	18.4928
1684	114.409	12.974	49.6558	28.1984
1685	67.0018	15.9213	47.8284	42.8232
1686	84.4976	11.4867	32.4585	44.6538
1687	90.9065	16.7368	27.9801	39.211
1688	58.2727	9.35104	38.1738	29.9196
1689	71.6822	15.7339	61.1118	49.3678
1690	42.1507	10.1201	33.3378	27.3411
1691	73.3834	16.6568	50.4063	22.5174
1692	113.764	14.6278	57.6557	46.9886
1693	74.1416	14.7418	23.3635	7.97568
1694	74.3704	17.3108	61.5411	50.1323
1695	57.0633	14.062	44.7827	27.977
1696	84.7461	15.3671	55.9361	32.3106
1697	107.242	7.55312	48.8662	9.34866
1698	59.4199	9.9265	44.932	30.0057
1699	20.816	19.8497	55.2679	24.695
1700	62.5262	18.4657	54.0312	32.2673
1701	66.4723	14.1092	48.3539	17.6002
1702	89.768	9.24176	25.6532	23.4045
1703	45.6686	9.78176	37.2473	22.1202
1704	101.7	21.1464	48.2756	23.0276
1705	89.3889	17.9204	34.747	39.4007
1706	89.6037	14.4691	33.4706	40.7517
1707	41.0308	16.7243	47.6952	38.6038
1708	92.0179	21.3399	43.0142	23.9359
1709	58.9426	15.8777	54.6663	33.544
1710	57.0994	10.8551	46.4051	40.4999
1711	83.5882	23.3249	59.1429	34.7149
1712	80.0505	23.8999	48.5854	30.4924
1713	58.9937	17.1453	32.7587	32.2694
1714	66.1383	17.4432	35.5541	22.3758
1715	125.008	8.78441	45.5463	53.5168
1716	55.4728	16.2242	55.136	6.05731
1717	69.3094	7.47046	33.5622	41.7225
1718	83.19	15.6533	42.5636	27.3717
1719	58.7364	9.25671	65.2197	7.53977
1720	81.978	14.0758	58.9322	19.4594
1721	83.7784	19.8563	58.4706	30.7881
1722	79.8588	18.6798	26.0342	26.7374
1723	44.4988	14.0883	40.6603	25.949
1724	113.67	17.1206	35.9458	12.211
1725	53.7551	12.0004	60.3689	40.2347
1726	82.3	9.9426	50.108	56.764
1727	90.7961	19.2225	53.843	28.6941
1728	54.7574	13.6919	70.3496	25.9753
1729	106.18	17.5813	46.2474	19.1175
1730	72.7823	18.3701	63.0184	25.5735
1731	101.515	26.6583	66.5676	8.18901
1732	91.0805	19.0483	45.3303	18.1765
1733	81.8121	18.018	43.2374	30.1525
1734	73.0646	19.3097	46.0802	25.486
1735	89.4711	19.1666	42.2639	29.2507
1736	71.6963	18.1328	52.4301	24.3453
1737	77.5207	18.4993	58.195	28.9953
1738	81.6447	12.2005	46.4582	24.9866
1739	87.5288	9.28208	55.9292	17.1579
1740	75.3304	13.3362	46.5601	13.2789
1741	87.9284	20.4582	49.5468	40.325
1742	86.9001	17.7917	25.9649	15.336
1743	68.3207	9.82228	50.4584	45.3336
1744	67.4962	13.7713	48.4609	26.2408
1745	66.594	14.3286	52.0763	30.2737
1746	90.4561	8.17274	42.6272	37.0864
1747	80.4299	13.1788	46.9438	42.942
1748	85.3728	20.0122	57.9825	26.3468
1749	112.168	22.1113	41.7302	40.8277
1750	43.5258	15.3418	32.7022	29.2181
1751	72.5609	14.1508	40.9756	26.5329
1752	66.7191	7.78993	46.3805	30.5299
1753	54.0141	12.9962	29.9305	20.5652
1754	52.604	13.8931	28.8435	46.5402
1755	64.1473	13.1023	35.1589	14.1148
1756	77.7342	15.5748	44.9252	11.8587
1757	75.8811	17.1311	44.3759	41.9696
1758	62.8727	12.9928	57.6882	39.6205
1759	58.2527	14.853	57.3596	37.0855
1760	112.188	7.02143	33.9889	39.637
1761	41.1126	15.5219	31.8817	23.4228
1762	43.5422	13.5171	50.7759	37.084
1763	87.5324	18.6577	44.4389	28.8562
1764	73.648	18.5448	57.3315	27.5274
1765	71.6773	16.7323	38.9059	26.6849
1766	37.9564	17.2701	29.5348	26.9528
1767	133.648	11.2989	51.1387	22.3306
1768	81.9493	17.6194	64.2151	27.5512
1769	74.8325	12.4763	58.0074	5.44928
1770	128.592	13.8894	42.0524	21.7
1771	61.3842	18.4276	47.9093	44.1951
1772	102.049	16.9225	29.5165	18.0534
1773	106.732	11.4157	50.5016	41.1672
1774	114.469	12.6618	33.5081	28.9141
1775	36.3031	13.0183	46.948	14.0706
1776	108.1	15.5482	44.5033	52.9614
1777	83.3644	14.2568	52.0308	36.1711
1778	61.4176	14.5779	37.7267	30.449
1779	96.5714	23.127	37.7619	46.291
1780	85.2446	15.5028	47.2155	28.1411
1781	32.8895	9.70434	39.4747	39.3638
1782	75.9353	9.96151	53.8891	14.9265
1783	79.4512	9.37272	48.2717	33.4358
1784	67.7026	6.83504	30.0891	26.6681
1785	72.0117	19.6321	63.0845	29.2868
1786	75.5727	21.5354	27.4987	19.457
1787	70.2557	13.3225	52.9395	36.6984
1788	71.0214	19.1269	25.1332	46.1454
1789	91.134	12.6531	44.1271	27.6605
1790	64.2693	16.6915	52.4766	54.1214
1791	87.1825	15.3835	31.0406	54.4334
1792	77.4742	17.6546	49.5091	24.7491
1793	115.366	14.8287	56.6924	30.4861
1794	59.2717	12.2824	48.8093	47.3165
1795	46.6801	18.2055	41.0686	28.0258
1796	84.277	21.078	40.7083	21.2492
1797	58.8693	16.3992	42.8349	45.4584
1798	98.3213	10.294	55.3987	37.7187
1799	70.0906	14.1525	41.8111	25.3041
1800	94.406	20.4444	44.4829	18.8373
1801	50.5477	17.5609	67.7251	58.1342
1802	92.0938	17.4572	42.4119	44.0581
1803	41.0865	13.5566	37.8326	48.8403
1804	55.1256	11.638	28.3682	28.8463
1805	105.744	14.8328	42.2853	35.3778
1806	44.669	19.1118	26.9252	39.0803
1807	82.7582	17.3873	59.0181	19.9063
1808	105.137	16.2818	43.1009	16.2259
1809	99.4696	18.4024	37.9972	9.26421
1810	19.7302	11.8193	54.3595	23.5161
1811	125.526	12.9058	52.6529	18.5049
1812	68.5792	8.15667	43.6862	22.2704
1813	94.5836	28.4175	38.8125	48.1727
1814	69.527	16.2447	53.373	23.3922
1815	58.3698	18.2206	51.91	25.5091
1816	73.5751	20.2309	57.9	31.0551
1817	61.2205	18.805	47.607	24.7564
1818	68.8951	8.48065	56.4777	22.9928
1819	78.7344	18.1397	48.0808	18.1309
1820	91.3794	20.5628	35.3277	28.5818
1821	100.313	22.2764	35.84	7.58229
1822	76.6339	22.1033	42.7079	16.1292
1823	70.2413	6.95711	25.6632	30.4939
1824	73.113	14.8395	42.7994	34.9663
1825	67.143	15.244	30.3478	36.6512
1826	78.2985	8.78063	63.3353	28.7718
1827	83.7131	6.97173	48.6812	14.9341
1828	49.4442	18.7546	43.6393	44.0994
1829	62.4782	24.1836	55.3085	49.2309
1830	91.3751	18.5607	30.1113	30.8649
1831	113.765	18.5837	56.5046	24.2304
1832	93.3306	18.9803	36.178	13.876
1833	42.4342	15.6679	52.2589	33.8181
1834	71.8175	16.0244	35.1998	41.1964
1835	65.9367	16.9806	59.1378	15.4549
1836	76.0037	11.5999	28.867	12.6635
1837	63.2611	10.7402	49.8183	25.2453
1838	95.7464	20.0356	29.2952	38.3603
1839	83.7297	13.8148	51.3109	36.9776
1840	82.8442	6.31857	23.0363	43.4814
1841	112.596	11.7562	49.2304	50.548
1842	65.1601	12.6726	60.0621	56.4007
1843	104.804	20.8153	43.4389	33.3011
1844	88.3851	15.7711	39.9651	38.4757
1845	47.1568	12.3896	64.9492	31.6389
1846	86.1437	17.9632	81.4588	27.64
1847	64.5503	14.2544	45.8537	30.0577
1848	80.8793	11.3418	42.7027	23.0523
1849	54.2157	9.27869	36.3964	29.6037
1850	101.121	12.8186	37.3469	29.8437
1851	62.627	16.8697	42.2498	27.2388
1852	88.0506	6.64671	37.0962	42.0862
1853	90.6165	11.0297	41.6114	13.8965
1854	64.956	18.9869	55.7223	15.585
1855	66.1113	17.6866	44.33	26.4839
1856	58.9076	11.7421	49.0155	49.2116
1857	83.3476	20.9229	76.9641	38.0722
1858	78.2153	14.5846	56.4624	21.3458
1859	72.7988	20.8031	35.8402	17.8174
1860	109.181	10.8452	52.9394	34.6759
1861	63.0318	17.4645	46.4988	32.6782
1862	96.5301	13.0977	35.8457	16.257
1863	97.863	17.052	40.8164	31.5617
1864	62.462	13.9945	32.9319	25.5859
1865	74.9258	8.12502	38.8926	31.9174
1866	59.6506	6.53733	28.2503	23.9242
1867	106.813	16.8569	56.9331	34.8548
1868	47.6308	16.5038	48.1908	36.4492
1869	66.2223	20.4819	57.2062	44.2187
1870	56.0422	15.2591	57.7427	31.3784
1871	66.5756	18.6743	62.7784	40.2294
1872	65.6107	19.1963	32.6915	32.7365
1873	52.3731	10.3835	30.0319	24.8458
1874	87.1398	12.0454	58.425	18.4501
1875	55.9563	9.5074	47.9913	24.233
1876	55.6037	7.72125	34.5371	29.6026
1877	50.9799	9.50444	49.6261	29.5003
1878	55.0486	9.01216	46.7989	28.885
1879	70.2561	7.49436	55.3015	28.656
1880	65.3715	20.8574	55.6216	16.3818
1881	73.3202	12.0321	52.4922	40.1969
1882	71.6844	16.5175	28.6375	36.9001
1883	47.2756	18.5927	47.5021	31.4435
1884	116.188	14.4914	35.0185	18.4734
1885	116.994	8.39969	45.3637	35.2555
1886	68.2953	10.7102	37.737	33.7423
1887	50.0712	14.7954	35.6655	32.9377
1888	30.0138	17.5604	34.1564	47.1655
1889	78.9003	15.1302	42.1764	36.7596
1890	49.0735	14.7245	28.5814	15.8759
1891	85.204	16.4152	38.7102	42.7388
1892	88.0118	22.9077	60.0172	51.0897
1893	85.0143	15.8234	31.1299	40.6879
1894	63.275	19.7506	43.0663	21.6024
1895	99.3587	17.0529	56.7507	34.9198
1896	89.3749	19.2701	31.0602	41.5869
1897	77.4704	16.9383	31.2568	33.9476
1898	32.4705	6.03052	60.9065	27.1431
1899	64.4565	13.8566	38.9824	29.0625
1900	107.943	15.4281	42.8995	38.9524
1901	58.3947	10.5187	64.3373	43.6766
1902	105.383	14.8385	40.8662	16.6707
1903	53.5869	19.0594	35.6873	18.7934
1904	72.0117	20.8633	35.2912	32.4737
1905	66.0276	9.94352	71.8019	42.4949
1906	83.5128	9.30874	49.0409	33.0424
1907	97.96	15.3466	56.4795	4.36463
1908	83.4507	9.83102	47.718	10.7225
1909	57.6161	9.77749	62.49	20.5709
1910	57.1255	22.5687	37.6071	16.2088
1911	60.6076	17.893	45.3861	13.2683
1912	76.2688	17.9003	38.7717	33.8013
1913	72.9805	14.6181	52.3747	35.3544
1914	68.1565	18.7648	52.0573	46.4715
1915	61.0185	16.1129	40.1776	28.5926
1916	101.333	13.3739	45.6261	35.931
1917	43.5511	13.305	29.6065	29.0425
1918	66.6012	18.7831	64.02	29.0189
1919	93.5644	14.2624	45.4134	41.8603
1920	25.0596	11.4198	39.5454	14.4255
1921	70.6843	14.549	32.8211	22.4254
1922	52.2935	21.0059	32.9016	22.0918
1923	70.8899	15.2191	38.0806	30.6726
1924	34.8837	20.5474	65.7358	49.1937
1925	62.8427	16.73	37.3135	52.5115
1926	35.4236	13.4705	51.1301	9.6724
1927	60.7771	9.30323	26.0247	26.3768
1928	51.6672	8.33331	48.2663	34.2809
1929	122.213	18.6208	46.3751	30.4901
1930	59.2086	17.6896	50.128	33.6869
1931	86.6853	11.3535	51.1225	18.749
1932	65.8836	16.7879	49.0363	22.9776
1933	64.6328	11.0402	56.9661	30.1529
1934	77.9622	15.031	36.1667	52.1101
1935	92.7845	11.6019	68.7846	42.8095
1936	83.4375	12.149	36.812	26.9049
1937	77.6857	11.6096	47.1749	50.986
1938	71.6738	7.45471	51.6773	36.1991
1939	110.939	19.2291	34.3411	28.2688
1940	77.5926	16.1938	34.0055	42.2031
1941	71.7971	19.5142	56.5266	38.5937
1942	48.5209	21.1015	52.5781	45.4948
1943	71.9908	19.075	44.7452	36.5252
1944	58.9603	9.9847	51.9115	30.1003
1945	75.8862	14.8886	41.615	44.5515
1946	80.472	18.6627	21.2926	25.8802
1947	36.5013	12.1846	51.6184	21.7901
1948	104.718	12.9147	53.0446	39.3547
1949	77.219	19.2197	27.5215	31.673
1950	62.5846	17.1212	47.8284	16.1612
1951	74.8874	15.101	60.7634	46.1644
1952	31.4402	17.8279	41.9041	25.1186
1953	76.8333	19.252	31.5042	21.5218
1954	88.9356	19.2076	49.1448	28.8864
1955	44.9491	6.96839	42.959	39.9541
1956	59.9176	11.9705	64.2176	14.1453
1957	91.72	17.1878	62.4105	35.0646
1958	92.2194	18.2136	49.9693	46.5991
1959	48.3442	18.8752	52.5916	21.9559
1960	80.3248	25.9122	31.4212	19.716
1961	90.9555	18.998	36.3836	40.0483
1962	74.5096	11.3782	42.6637	22.6676
1963	59.6382	18.3117	51.1506	43.68
1964	61.3983	14.3034	51.5649	11.3192
1965	62.1318	21.1028	57.7633	43.4315
1966	58.7289	11.3134	57.4386	31.8066
1967	68.535	12.175	40.4647	30.2665
1968	86.8412	7.8	56.5741	25.2302
1969	66.0367	22.0283	27.5305	25.221
1970	77.305	23.5569	38.2169	12.2549
1971	85.807	20.1535	63.3611	22.1679
1972	81.3388	20.0336	58.7979	51.4526
1973	58.8043	8.71851	37.6282	49.9334
1974	62.8721	7.37495	30.6053	24.8877
1975	76.5663	14.1986	30.9283	28.9424
1976	144.834	21.1275	44.2257	12.5265
1977	71.7335	18.9106	28.7664	34.964
1978	76.9565	11.0382	31.5504	17.1072
1979	78.5577	21.7752	48.3756	37.3618
1980	120.751	16.538	42.9446	13.4894
1981	91.7971	18.1185	45.3063	36.0949
1982	81.9961	13.621	39.2838	30.7098
1983	85.8306	18.7179	44.8515	45.423
1984	40.1195	16.1369	57.8398	34.9004
1985	58.4555	20.1213	50.1689	30.7738
1986	51.8028	19.6148	58.0243	38.7478
1987	40.9553	15.2368	23.7569	12.625
1988	110.345	17.5105	35.1625	36.4673
1989	45.0752	13.7795	73.818	43.951
1990	104.939	9.61225	40.6656	27.1676
1991	35.8531	20.8868	56.6435	32.9594
1992	78.5682	8.32053	66.9723	26.4666
1993	96.8777	17.6212	36.2558	37.0753
1994	27.9126	22.8024	43.4664	21.0496
1995	60.3512	7.69902	50.8139	12.2034
1996	55.9461	9.91881	31.6019	15.0336
1997	61.7366	15.6712	35.6992	23.1014
1998	89.4832	13.9014	32.6712	22.4879
1999	83.603	12.9677	48.645	24.9317
[truncated: 8,001 more rows]

## Sheet: Simulation Output Values 1
Sim #	ADD	ADDc	CR	HQ
1	5.81397e-06	3.66599e-06	2.44399e-06	0.0193799
2	1.19739e-05	7.55013e-06	5.03342e-06	0.039913
3	4.02252e-06	2.5364e-06	1.69093e-06	0.0134084
4	4.16227e-06	2.62452e-06	1.74968e-06	0.0138742
5	1.10324e-05	6.9565e-06	4.63767e-06	0.0367748
6	3.04534e-06	1.92024e-06	1.28016e-06	0.0101511
7	7.75263e-06	4.88841e-06	3.25894e-06	0.0258421
8	1.34636e-06	8.48945e-07	5.65964e-07	0.00448786
9	9.38759e-06	5.91933e-06	3.94622e-06	0.031292
10	4.24846e-06	2.67887e-06	1.78591e-06	0.0141615
11	9.9443e-06	6.27037e-06	4.18025e-06	0.0331477
12	1.03197e-05	6.50707e-06	4.33805e-06	0.034399
13	1.47972e-05	9.33038e-06	6.22025e-06	0.0493241
14	6.36263e-06	4.01195e-06	2.67463e-06	0.0212088
15	7.72948e-06	4.87381e-06	3.24921e-06	0.0257649
16	4.9726e-06	3.13547e-06	2.09031e-06	0.0165753
17	1.25956e-05	7.94211e-06	5.29474e-06	0.0419852
18	9.69128e-06	6.11083e-06	4.07388e-06	0.0323043
19	9.04578e-06	5.70381e-06	3.80254e-06	0.0301526
20	3.24395e-06	2.04547e-06	1.36365e-06	0.0108132
21	4.1837e-06	2.63803e-06	1.75868e-06	0.0139457
22	1.3413e-06	8.45754e-07	5.63836e-07	0.00447099
23	5.57681e-06	3.51645e-06	2.3443e-06	0.0185894
24	2.44814e-06	1.54367e-06	1.02912e-06	0.00816047
25	8.00637e-06	5.04841e-06	3.3656e-06	0.0266879
26	2.53821e-06	1.60046e-06	1.06698e-06	0.00846069
27	1.5394e-06	9.70666e-07	6.47111e-07	0.00513133
28	3.3908e-06	2.13806e-06	1.42538e-06	0.0113027
29	1.16309e-05	7.33387e-06	4.88924e-06	0.0387697
30	2.84446e-06	1.79357e-06	1.19572e-06	0.00948154
31	1.35712e-05	8.55732e-06	5.70488e-06	0.0452374
32	1.46409e-05	9.23181e-06	6.15454e-06	0.048803
33	1.45109e-06	9.14985e-07	6.0999e-07	0.00483698
34	1.0433e-05	6.57849e-06	4.38566e-06	0.0347765
35	3.6889e-06	2.32603e-06	1.55069e-06	0.0122963
36	1.32885e-05	8.37906e-06	5.58604e-06	0.0442951
37	4.57131e-06	2.88244e-06	1.92162e-06	0.0152377
38	6.863e-06	4.32746e-06	2.88497e-06	0.0228767
39	2.83392e-06	1.78693e-06	1.19128e-06	0.00944641
40	4.78609e-06	3.01786e-06	2.01191e-06	0.0159536
41	8.24849e-06	5.20108e-06	3.46738e-06	0.027495
42	9.12189e-06	5.7518e-06	3.83453e-06	0.0304063
43	7.73283e-06	4.87593e-06	3.25062e-06	0.0257761
44	6.09405e-06	3.8426e-06	2.56173e-06	0.0203135
45	2.59923e-06	1.63894e-06	1.09263e-06	0.0086641
46	5.39327e-06	3.40072e-06	2.26715e-06	0.0179776
47	1.14385e-05	7.21254e-06	4.80836e-06	0.0381284
48	3.75616e-06	2.36844e-06	1.57896e-06	0.0125205
49	1.82517e-05	1.15086e-05	7.67239e-06	0.0608389
50	6.23398e-06	3.93083e-06	2.62055e-06	0.0207799
51	2.6666e-06	1.68142e-06	1.12095e-06	0.00888865
52	4.09725e-06	2.58352e-06	1.72235e-06	0.0136575
53	1.82569e-05	1.15119e-05	7.67457e-06	0.0608563
54	3.29212e-06	2.07584e-06	1.3839e-06	0.0109737
55	4.16594e-06	2.62683e-06	1.75122e-06	0.0138865
56	3.44125e-06	2.16988e-06	1.44659e-06	0.0114708
57	1.00122e-06	6.31316e-07	4.20877e-07	0.00333739
58	1.14325e-05	7.20877e-06	4.80585e-06	0.0381084
59	2.17911e-05	1.37404e-05	9.16024e-06	0.072637
60	7.26832e-06	4.58303e-06	3.05535e-06	0.0242277
61	1.41595e-05	8.92828e-06	5.95219e-06	0.0471985
62	3.48154e-06	2.19528e-06	1.46352e-06	0.0116051
63	6.09263e-06	3.8417e-06	2.56114e-06	0.0203088
64	9.24007e-06	5.82632e-06	3.88421e-06	0.0308002
65	4.48229e-06	2.82631e-06	1.8842e-06	0.014941
66	5.00474e-06	3.15573e-06	2.10382e-06	0.0166825
67	2.57343e-06	1.62267e-06	1.08178e-06	0.00857809
68	1.15702e-05	7.29559e-06	4.86373e-06	0.0385674
69	3.59577e-06	2.26731e-06	1.51154e-06	0.0119859
70	3.4205e-06	2.1568e-06	1.43786e-06	0.0114017
71	9.21966e-06	5.81345e-06	3.87563e-06	0.0307322
72	5.3875e-06	3.39708e-06	2.26472e-06	0.0179583
73	1.5938e-05	1.00497e-05	6.69979e-06	0.0531267
74	5.17001e-06	3.25994e-06	2.1733e-06	0.0172334
75	4.89594e-06	3.08713e-06	2.05809e-06	0.0163198
76	4.24476e-06	2.67653e-06	1.78435e-06	0.0141492
77	1.63775e-06	1.03268e-06	6.88455e-07	0.00545917
78	3.34427e-06	2.10873e-06	1.40582e-06	0.0111476
79	8.74086e-06	5.51154e-06	3.67436e-06	0.0291362
80	3.00839e-06	1.89694e-06	1.26462e-06	0.010028
81	3.20326e-06	2.01981e-06	1.34654e-06	0.0106775
82	5.30025e-06	3.34207e-06	2.22804e-06	0.0176675
83	8.24711e-06	5.20021e-06	3.4668e-06	0.0274904
84	2.70469e-06	1.70544e-06	1.13696e-06	0.00901563
85	2.43401e-06	1.53476e-06	1.02317e-06	0.00811336
86	4.71428e-06	2.97259e-06	1.98172e-06	0.0157143
87	7.85563e-06	4.95336e-06	3.30224e-06	0.0261854
88	1.45955e-05	9.20317e-06	6.13544e-06	0.0486516
89	4.24688e-06	2.67787e-06	1.78524e-06	0.0141563
90	6.20951e-06	3.9154e-06	2.61027e-06	0.0206984
91	2.35708e-06	1.48626e-06	9.90838e-07	0.00785695
92	1.46545e-05	9.24039e-06	6.16026e-06	0.0488484
93	8.84783e-06	5.57899e-06	3.71933e-06	0.0294928
94	2.82462e-06	1.78106e-06	1.18737e-06	0.0094154
95	9.6771e-06	6.10189e-06	4.06792e-06	0.032257
96	5.73748e-06	3.61776e-06	2.41184e-06	0.0191249
97	1.75725e-05	1.10803e-05	7.38687e-06	0.0585749
98	1.37556e-05	8.6736e-06	5.7824e-06	0.0458521
99	1.41478e-05	8.92088e-06	5.94726e-06	0.0471593
100	5.46423e-06	3.44547e-06	2.29698e-06	0.0182141
101	4.72378e-06	2.97858e-06	1.98572e-06	0.0157459
102	1.16979e-05	7.37608e-06	4.91739e-06	0.0389929
103	7.3992e-06	4.66556e-06	3.11037e-06	0.024664
104	7.34296e-06	4.6301e-06	3.08673e-06	0.0244765
105	1.48811e-05	9.38327e-06	6.25551e-06	0.0496037
106	1.12813e-05	7.11341e-06	4.74227e-06	0.0376043
107	1.07931e-05	6.80558e-06	4.53705e-06	0.035977
108	1.8063e-05	1.13896e-05	7.59308e-06	0.06021
109	2.0317e-05	1.28109e-05	8.54058e-06	0.0677234
110	6.36635e-06	4.0143e-06	2.6762e-06	0.0212212
111	4.4077e-06	2.77927e-06	1.85285e-06	0.0146923
112	5.73472e-06	3.61603e-06	2.41068e-06	0.0191157
113	8.29368e-06	5.22957e-06	3.48638e-06	0.0276456
114	6.9725e-06	4.3965e-06	2.931e-06	0.0232417
115	7.53221e-06	4.74943e-06	3.16628e-06	0.0251074
116	7.21485e-06	4.54932e-06	3.03288e-06	0.0240495
117	5.70098e-06	3.59475e-06	2.3965e-06	0.0190033
118	7.81197e-06	4.92583e-06	3.28389e-06	0.0260399
119	3.08862e-06	1.94752e-06	1.29835e-06	0.0102954
120	2.30038e-06	1.4505e-06	9.67001e-07	0.00766793
121	9.35699e-06	5.90004e-06	3.93336e-06	0.03119
122	1.63153e-06	1.02876e-06	6.8584e-07	0.00543843
123	1.34405e-05	8.47491e-06	5.64994e-06	0.0448017
124	4.83977e-06	3.05171e-06	2.03448e-06	0.0161326
125	6.3764e-06	4.02063e-06	2.68042e-06	0.0212547
126	6.23021e-06	3.92845e-06	2.61897e-06	0.0207674
127	9.29326e-06	5.85985e-06	3.90657e-06	0.0309775
128	8.27622e-06	5.21856e-06	3.47904e-06	0.0275874
129	6.42763e-06	4.05294e-06	2.70196e-06	0.0214254
130	5.54896e-06	3.49889e-06	2.33259e-06	0.0184965
131	1.31611e-05	8.29871e-06	5.53247e-06	0.0438703
132	7.26257e-06	4.57941e-06	3.05294e-06	0.0242086
133	1.53641e-05	9.68781e-06	6.45854e-06	0.0512136
134	1.01402e-05	6.39392e-06	4.26261e-06	0.0338008
135	2.97203e-06	1.87401e-06	1.24934e-06	0.00990677
136	2.17256e-05	1.36991e-05	9.13271e-06	0.0724187
137	1.33226e-05	8.40056e-06	5.60037e-06	0.0444087
138	6.43766e-06	4.05926e-06	2.70617e-06	0.0214589
139	1.45097e-05	9.14906e-06	6.09938e-06	0.0483656
140	1.39577e-05	8.80099e-06	5.86732e-06	0.0465255
141	9.63333e-06	6.07429e-06	4.04952e-06	0.0321111
142	9.38184e-06	5.91571e-06	3.94381e-06	0.0312728
143	3.32357e-06	2.09567e-06	1.39712e-06	0.0110786
144	3.47741e-06	2.19268e-06	1.46178e-06	0.0115914
145	4.83282e-06	3.04733e-06	2.03155e-06	0.0161094
146	4.80367e-06	3.02895e-06	2.0193e-06	0.0160122
147	2.03053e-06	1.28035e-06	8.53565e-07	0.00676843
148	8.57873e-06	5.40931e-06	3.60621e-06	0.0285958
149	1.20988e-06	7.62888e-07	5.08592e-07	0.00403293
150	4.39039e-06	2.76836e-06	1.84557e-06	0.0146346
151	3.10912e-06	1.96045e-06	1.30697e-06	0.0103637
152	8.82074e-06	5.56191e-06	3.70794e-06	0.0294025
153	8.59511e-06	5.41964e-06	3.61309e-06	0.0286504
154	7.79852e-06	4.91735e-06	3.27823e-06	0.0259951
155	1.58979e-05	1.00244e-05	6.68294e-06	0.052993
156	2.24257e-05	1.41405e-05	9.427e-06	0.0747524
157	5.94288e-06	3.74728e-06	2.49819e-06	0.0198096
158	1.27039e-05	8.01043e-06	5.34028e-06	0.0423463
159	4.7393e-06	2.98836e-06	1.99224e-06	0.0157977
160	4.62762e-06	2.91794e-06	1.9453e-06	0.0154254
161	4.72378e-06	2.97857e-06	1.98571e-06	0.0157459
162	2.31443e-06	1.45936e-06	9.72908e-07	0.00771477
163	1.91095e-06	1.20495e-06	8.033e-07	0.00636985
164	5.51263e-06	3.47598e-06	2.31732e-06	0.0183754
165	4.57646e-06	2.88568e-06	1.92379e-06	0.0152549
166	4.78694e-06	3.0184e-06	2.01227e-06	0.0159565
167	5.44487e-06	3.43326e-06	2.28884e-06	0.0181496
168	1.49161e-05	9.40534e-06	6.27023e-06	0.0497204
169	4.98982e-06	3.14633e-06	2.09755e-06	0.0166327
170	9.15009e-06	5.76958e-06	3.84639e-06	0.0305003
171	4.28619e-06	2.70266e-06	1.80177e-06	0.0142873
172	2.83871e-06	1.78995e-06	1.1933e-06	0.00946237
173	9.5568e-06	6.02603e-06	4.01735e-06	0.031856
174	1.53936e-05	9.70644e-06	6.47096e-06	0.0513121
175	6.64189e-06	4.18804e-06	2.79202e-06	0.0221396
176	2.9227e-06	1.84291e-06	1.2286e-06	0.00974233
177	4.75446e-06	2.99792e-06	1.99861e-06	0.0158482
178	2.28324e-06	1.4397e-06	9.59799e-07	0.00761082
179	8.12484e-06	5.12311e-06	3.41541e-06	0.0270828
180	3.64265e-06	2.29687e-06	1.53124e-06	0.0121422
181	3.59487e-06	2.26674e-06	1.51116e-06	0.0119829
182	1.52724e-05	9.62997e-06	6.41998e-06	0.0509079
183	4.94615e-06	3.11879e-06	2.07919e-06	0.0164872
184	4.73174e-06	2.9836e-06	1.98906e-06	0.0157725
185	2.46203e-06	1.55243e-06	1.03496e-06	0.00820678
186	3.78598e-06	2.38724e-06	1.5915e-06	0.0126199
187	1.25984e-05	7.94391e-06	5.29594e-06	0.0419947
188	9.70443e-06	6.11912e-06	4.07941e-06	0.0323481
189	4.309e-06	2.71703e-06	1.81136e-06	0.0143633
190	2.26558e-06	1.42856e-06	9.52373e-07	0.00755193
191	4.39019e-06	2.76823e-06	1.84549e-06	0.014634
192	1.68605e-06	1.06314e-06	7.08758e-07	0.00562017
193	1.52334e-06	9.60539e-07	6.40359e-07	0.00507779
194	1.04616e-05	6.59657e-06	4.39771e-06	0.0348721
195	8.68652e-06	5.47727e-06	3.65152e-06	0.0289551
196	1.22184e-05	7.70432e-06	5.13621e-06	0.0407281
197	1.17828e-05	7.42962e-06	4.95308e-06	0.0392759
198	5.24015e-06	3.30417e-06	2.20278e-06	0.0174672
199	4.33795e-06	2.73529e-06	1.82353e-06	0.0144598
200	9.62574e-06	6.0695e-06	4.04634e-06	0.0320858
201	5.07128e-06	3.19769e-06	2.1318e-06	0.0169043
202	1.23013e-05	7.75656e-06	5.17104e-06	0.0410043
203	8.51515e-06	5.36922e-06	3.57948e-06	0.0283838
204	5.21538e-06	3.28855e-06	2.19237e-06	0.0173846
205	1.37002e-05	8.63865e-06	5.7591e-06	0.0456674
206	2.47087e-06	1.55801e-06	1.03867e-06	0.00823625
207	1.30133e-05	8.20552e-06	5.47034e-06	0.0433776
208	3.31765e-06	2.09194e-06	1.39463e-06	0.0110588
209	1.25644e-05	7.92246e-06	5.28164e-06	0.0418813
210	4.4576e-06	2.81074e-06	1.87382e-06	0.0148587
211	5.53171e-06	3.48801e-06	2.32534e-06	0.018439
212	6.38336e-06	4.02502e-06	2.68335e-06	0.0212779
213	4.44824e-06	2.80483e-06	1.86989e-06	0.0148275
214	7.33926e-06	4.62777e-06	3.08518e-06	0.0244642
215	3.84675e-06	2.42556e-06	1.61704e-06	0.0128225
216	6.94146e-06	4.37693e-06	2.91796e-06	0.0231382
217	1.12655e-05	7.10346e-06	4.73564e-06	0.0375517
218	3.93834e-06	2.48332e-06	1.65554e-06	0.0131278
219	5.83799e-06	3.68114e-06	2.45409e-06	0.01946
220	6.65017e-06	4.19326e-06	2.79551e-06	0.0221672
221	6.97618e-06	4.39882e-06	2.93255e-06	0.0232539
222	9.96642e-06	6.28432e-06	4.18955e-06	0.0332214
223	5.43927e-06	3.42973e-06	2.28649e-06	0.0181309
224	2.67229e-06	1.68501e-06	1.12334e-06	0.00890762
225	1.27756e-05	8.05565e-06	5.37043e-06	0.0425854
226	4.35591e-06	2.74662e-06	1.83108e-06	0.0145197
227	1.39144e-06	8.77373e-07	5.84915e-07	0.00463814
228	5.94892e-06	3.75109e-06	2.50072e-06	0.0198297
229	5.90074e-06	3.72071e-06	2.48047e-06	0.0196691
230	5.47492e-06	3.4522e-06	2.30147e-06	0.0182497
231	3.59659e-06	2.26782e-06	1.51188e-06	0.0119886
232	1.11524e-06	7.03214e-07	4.68809e-07	0.00371747
233	1.53626e-05	9.68688e-06	6.45792e-06	0.0512087
234	5.15546e-06	3.25077e-06	2.16718e-06	0.0171849
235	8.90787e-06	5.61685e-06	3.74457e-06	0.0296929
236	9.63967e-06	6.07828e-06	4.05219e-06	0.0321322
237	5.5683e-06	3.51109e-06	2.34072e-06	0.018561
238	7.70322e-06	4.85726e-06	3.23817e-06	0.0256774
239	9.41441e-06	5.93625e-06	3.9575e-06	0.0313814
240	1.60723e-06	1.01344e-06	6.75627e-07	0.00535745
241	1.86383e-06	1.17523e-06	7.8349e-07	0.00621276
242	7.15387e-06	4.51087e-06	3.00725e-06	0.0238462
243	1.03804e-05	6.54536e-06	4.36357e-06	0.0346014
244	5.63104e-06	3.55065e-06	2.3671e-06	0.0187701
245	3.47512e-06	2.19123e-06	1.46082e-06	0.0115837
246	1.45069e-05	9.14729e-06	6.09819e-06	0.0483562
247	8.73657e-06	5.50884e-06	3.67256e-06	0.0291219
248	4.8714e-06	3.07166e-06	2.04777e-06	0.016238
249	1.7251e-06	1.08776e-06	7.25173e-07	0.00575033
250	8.96793e-07	5.65472e-07	3.76981e-07	0.00298931
251	2.33845e-06	1.47451e-06	9.83004e-07	0.00779483
252	1.92128e-06	1.21146e-06	8.07639e-07	0.00640425
253	4.1845e-06	2.63853e-06	1.75902e-06	0.0139483
254	6.23578e-06	3.93197e-06	2.62131e-06	0.0207859
255	5.30919e-06	3.3477e-06	2.2318e-06	0.0176973
256	2.73174e-06	1.7225e-06	1.14833e-06	0.0091058
257	3.53464e-06	2.22876e-06	1.48584e-06	0.0117821
258	1.01498e-05	6.39997e-06	4.26664e-06	0.0338328
259	7.38578e-06	4.6571e-06	3.10473e-06	0.0246193
260	6.35933e-06	4.00987e-06	2.67325e-06	0.0211978
261	2.56332e-06	1.6163e-06	1.07753e-06	0.0085444
262	5.24398e-06	3.30659e-06	2.20439e-06	0.0174799
263	1.45933e-05	9.20179e-06	6.13453e-06	0.0486443
264	6.18105e-06	3.89745e-06	2.5983e-06	0.0206035
265	6.62141e-06	4.17512e-06	2.78342e-06	0.0220714
266	6.36649e-06	4.01438e-06	2.67625e-06	0.0212216
267	7.11928e-06	4.48906e-06	2.99271e-06	0.0237309
268	6.3843e-06	4.02562e-06	2.68374e-06	0.021281
269	8.16881e-06	5.15083e-06	3.43389e-06	0.0272294
270	1.40354e-05	8.84998e-06	5.89999e-06	0.0467845
271	8.79765e-06	5.54735e-06	3.69823e-06	0.0293255
272	4.94881e-06	3.12047e-06	2.08031e-06	0.016496
273	9.56873e-06	6.03355e-06	4.02237e-06	0.0318958
274	8.13019e-06	5.12648e-06	3.41766e-06	0.0271006
275	3.78317e-06	2.38547e-06	1.59032e-06	0.0126106
276	6.73922e-06	4.24941e-06	2.83294e-06	0.0224641
277	8.53401e-06	5.38111e-06	3.58741e-06	0.0284467
278	2.89403e-06	1.82483e-06	1.21655e-06	0.00964676
279	3.54195e-06	2.23337e-06	1.48891e-06	0.0118065
280	1.91793e-06	1.20935e-06	8.06231e-07	0.00639309
281	1.49274e-05	9.41246e-06	6.27497e-06	0.049758
282	2.4174e-06	1.52429e-06	1.01619e-06	0.00805799
283	4.56324e-06	2.87735e-06	1.91823e-06	0.0152108
284	7.35677e-06	4.63881e-06	3.09254e-06	0.0245226
285	4.41745e-06	2.78542e-06	1.85695e-06	0.0147248
286	1.90057e-05	1.1984e-05	7.98936e-06	0.0633524
287	3.60129e-06	2.27079e-06	1.51386e-06	0.0120043
288	3.51234e-06	2.21471e-06	1.47647e-06	0.0117078
289	5.38173e-06	3.39345e-06	2.2623e-06	0.0179391
290	6.89608e-06	4.34832e-06	2.89888e-06	0.0229869
291	3.63415e-06	2.29151e-06	1.52767e-06	0.0121138
292	4.25336e-06	2.68195e-06	1.78797e-06	0.0141779
293	8.19642e-06	5.16825e-06	3.4455e-06	0.0273214
294	6.08436e-06	3.83649e-06	2.55766e-06	0.0202812
295	5.07841e-06	3.20219e-06	2.13479e-06	0.016928
296	5.8419e-06	3.68361e-06	2.45574e-06	0.019473
297	6.3304e-06	3.99163e-06	2.66109e-06	0.0211013
298	9.86158e-06	6.21821e-06	4.14547e-06	0.0328719
299	8.98407e-06	5.6649e-06	3.7766e-06	0.0299469
300	7.04541e-06	4.44248e-06	2.96165e-06	0.0234847
301	8.49276e-06	5.3551e-06	3.57007e-06	0.0283092
302	4.23164e-06	2.66826e-06	1.77884e-06	0.0141055
303	2.59675e-06	1.63738e-06	1.09159e-06	0.00865585
304	2.55132e-06	1.60873e-06	1.07249e-06	0.0085044
305	6.28938e-06	3.96576e-06	2.64384e-06	0.0209646
306	5.98566e-06	3.77425e-06	2.51617e-06	0.0199522
307	2.12296e-05	1.33863e-05	8.92421e-06	0.0707654
308	1.36321e-06	8.59572e-07	5.73048e-07	0.00454404
309	5.1565e-06	3.25143e-06	2.16762e-06	0.0171883
310	1.20952e-05	7.62662e-06	5.08442e-06	0.0403174
311	1.03263e-05	6.51125e-06	4.34083e-06	0.0344211
312	1.59004e-05	1.0026e-05	6.684e-06	0.0530014
313	1.09671e-05	6.9153e-06	4.6102e-06	0.036557
314	1.28828e-05	8.12325e-06	5.4155e-06	0.0429427
315	6.53573e-06	4.1211e-06	2.7474e-06	0.0217858
316	1.02693e-05	6.47531e-06	4.31687e-06	0.0342311
317	4.67408e-06	2.94723e-06	1.96482e-06	0.0155803
318	5.46037e-06	3.44303e-06	2.29535e-06	0.0182012
319	2.99304e-05	1.88726e-05	1.25817e-05	0.0997679
320	6.44579e-06	4.06438e-06	2.70959e-06	0.021486
321	3.4461e-06	2.17294e-06	1.44862e-06	0.011487
322	2.18509e-06	1.3778e-06	9.18536e-07	0.00728362
323	1.27852e-06	8.06167e-07	5.37445e-07	0.00426172
324	5.91364e-06	3.72884e-06	2.48589e-06	0.0197121
325	1.44766e-05	9.1282e-06	6.08547e-06	0.0482553
326	1.61452e-05	1.01804e-05	6.7869e-06	0.0538174
327	7.94631e-06	5.01054e-06	3.34036e-06	0.0264877
328	4.51941e-06	2.84971e-06	1.8998e-06	0.0150647
329	7.88333e-06	4.97083e-06	3.31389e-06	0.0262778
330	8.28528e-06	5.22427e-06	3.48285e-06	0.0276176
331	3.30168e-06	2.08187e-06	1.38792e-06	0.0110056
332	8.50047e-06	5.35996e-06	3.57331e-06	0.0283349
333	4.03257e-06	2.54273e-06	1.69515e-06	0.0134419
334	5.53911e-06	3.49268e-06	2.32845e-06	0.0184637
335	1.38929e-06	8.76016e-07	5.8401e-07	0.00463097
336	1.90337e-05	1.20017e-05	8.00111e-06	0.0634456
337	1.03374e-05	6.51822e-06	4.34548e-06	0.0344579
338	1.17747e-05	7.42451e-06	4.94967e-06	0.0392489
339	7.29735e-06	4.60133e-06	3.06756e-06	0.0243245
340	1.42193e-05	8.96599e-06	5.97733e-06	0.0473978
341	4.57966e-06	2.8877e-06	1.92513e-06	0.0152655
342	1.75336e-06	1.10558e-06	7.37054e-07	0.00584454
343	4.80131e-06	3.02746e-06	2.01831e-06	0.0160044
344	2.7416e-06	1.72872e-06	1.15248e-06	0.00913868
345	1.77371e-05	1.11841e-05	7.45607e-06	0.0591236
346	2.0787e-05	1.31072e-05	8.73817e-06	0.0692901
347	7.50924e-06	4.73495e-06	3.15663e-06	0.0250308
348	5.77103e-06	3.63892e-06	2.42595e-06	0.0192368
349	4.75824e-06	3.00031e-06	2.0002e-06	0.0158608
350	2.87844e-06	1.815e-06	1.21e-06	0.0095948
351	5.16654e-06	3.25776e-06	2.17184e-06	0.0172218
352	3.02161e-06	1.90527e-06	1.27018e-06	0.010072
353	8.73835e-06	5.50996e-06	3.67331e-06	0.0291278
354	5.61433e-06	3.54011e-06	2.36008e-06	0.0187144
355	5.88569e-06	3.71122e-06	2.47415e-06	0.019619
356	1.51624e-06	9.56062e-07	6.37375e-07	0.00505412
357	3.27298e-06	2.06378e-06	1.37585e-06	0.0109099
358	7.23075e-06	4.55934e-06	3.03956e-06	0.0241025
359	4.41093e-06	2.78131e-06	1.8542e-06	0.0147031
360	5.61612e-06	3.54124e-06	2.36083e-06	0.0187204
361	3.63722e-06	2.29345e-06	1.52896e-06	0.0121241
362	7.33319e-06	4.62394e-06	3.08262e-06	0.024444
363	5.63884e-06	3.55556e-06	2.37038e-06	0.0187961
364	4.31571e-06	2.72127e-06	1.81418e-06	0.0143857
365	6.03861e-06	3.80764e-06	2.53843e-06	0.0201287
366	1.38642e-05	8.74208e-06	5.82805e-06	0.0462141
367	3.99463e-06	2.51881e-06	1.67921e-06	0.0133154
368	4.69066e-06	2.95769e-06	1.9718e-06	0.0156355
369	9.11969e-06	5.75041e-06	3.83361e-06	0.030399
370	1.21069e-05	7.63402e-06	5.08935e-06	0.0403565
371	8.13106e-06	5.12703e-06	3.41802e-06	0.0271035
372	1.59309e-05	1.00452e-05	6.69679e-06	0.0531029
373	9.16705e-06	5.78028e-06	3.85352e-06	0.0305568
374	4.16118e-06	2.62383e-06	1.74922e-06	0.0138706
375	7.76834e-06	4.89832e-06	3.26555e-06	0.0258945
376	1.48212e-05	9.34547e-06	6.23031e-06	0.0494039
377	5.74304e-06	3.62127e-06	2.41418e-06	0.0191435
378	7.65985e-06	4.82991e-06	3.21994e-06	0.0255328
379	2.55005e-06	1.60793e-06	1.07196e-06	0.00850018
380	3.17798e-06	2.00387e-06	1.33592e-06	0.0105933
381	2.17827e-05	1.37351e-05	9.15672e-06	0.0726091
382	1.07662e-05	6.78864e-06	4.52576e-06	0.0358874
383	5.08956e-06	3.20921e-06	2.13948e-06	0.0169652
384	6.3693e-06	4.01615e-06	2.67744e-06	0.021231
385	7.74314e-06	4.88243e-06	3.25495e-06	0.0258105
386	2.13345e-06	1.34525e-06	8.9683e-07	0.0071115
387	3.13006e-06	1.97365e-06	1.31577e-06	0.0104335
388	3.72409e-06	2.34822e-06	1.56548e-06	0.0124136
389	3.81542e-06	2.40581e-06	1.60387e-06	0.0127181
390	2.80041e-05	1.7658e-05	1.1772e-05	0.0933471
391	1.38011e-05	8.70227e-06	5.80151e-06	0.0460037
392	1.22908e-05	7.74995e-06	5.16663e-06	0.0409693
393	1.82258e-06	1.14922e-06	7.66149e-07	0.00607526
394	1.69472e-05	1.06861e-05	7.12404e-06	0.0564908
395	3.5947e-05	2.26663e-05	1.51109e-05	0.119823
396	7.71977e-06	4.86769e-06	3.24513e-06	0.0257326
397	1.10025e-05	6.9376e-06	4.62506e-06	0.0366749
398	2.57174e-06	1.62161e-06	1.08107e-06	0.00857247
399	1.12344e-05	7.08386e-06	4.72258e-06	0.0374481
400	1.01418e-06	6.39489e-07	4.26326e-07	0.00338059
401	1.9208e-05	1.21116e-05	8.07438e-06	0.0640266
402	1.13968e-05	7.18623e-06	4.79082e-06	0.0379893
403	6.75412e-06	4.2588e-06	2.8392e-06	0.0225137
404	5.43548e-06	3.42734e-06	2.28489e-06	0.0181183
405	6.03499e-06	3.80536e-06	2.5369e-06	0.0201166
406	3.9009e-06	2.45971e-06	1.63981e-06	0.013003
407	6.37945e-06	4.02256e-06	2.6817e-06	0.0212648
408	7.38237e-06	4.65495e-06	3.1033e-06	0.0246079
409	2.99767e-06	1.89018e-06	1.26012e-06	0.00999225
410	2.62605e-06	1.65586e-06	1.1039e-06	0.00875351
411	6.8707e-06	4.33231e-06	2.88821e-06	0.0229023
412	5.42333e-06	3.41967e-06	2.27978e-06	0.0180778
413	7.03392e-06	4.43523e-06	2.95682e-06	0.0234464
414	1.98787e-05	1.25345e-05	8.35633e-06	0.0662624
415	4.24458e-06	2.67642e-06	1.78428e-06	0.0141486
416	7.01593e-06	4.42389e-06	2.94926e-06	0.0233864
417	9.66259e-06	6.09274e-06	4.06182e-06	0.0322086
418	1.16545e-05	7.34873e-06	4.89916e-06	0.0388483
419	1.50246e-06	9.47372e-07	6.31582e-07	0.00500819
420	1.89629e-06	1.1957e-06	7.97136e-07	0.00632096
421	2.0371e-06	1.28449e-06	8.56326e-07	0.00679032
422	1.17489e-05	7.40823e-06	4.93882e-06	0.0391629
423	4.17997e-06	2.63568e-06	1.75712e-06	0.0139332
424	3.07684e-06	1.9401e-06	1.2934e-06	0.0102561
425	9.56048e-07	6.02835e-07	4.0189e-07	0.00318683
426	4.06274e-06	2.56176e-06	1.70784e-06	0.0135425
427	5.75271e-06	3.62737e-06	2.41825e-06	0.0191757
428	5.38079e-06	3.39285e-06	2.2619e-06	0.017936
429	8.40152e-06	5.29757e-06	3.53171e-06	0.0280051
430	2.98035e-06	1.87925e-06	1.25284e-06	0.00993449
431	1.39669e-05	8.80683e-06	5.87122e-06	0.0465564
432	4.12088e-06	2.59842e-06	1.73228e-06	0.0137363
433	1.2827e-06	8.08807e-07	5.39205e-07	0.00427568
434	2.01666e-06	1.2716e-06	8.47733e-07	0.00672219
435	3.80528e-06	2.39941e-06	1.59961e-06	0.0126843
436	1.15923e-05	7.30949e-06	4.873e-06	0.0386409
437	3.50976e-06	2.21308e-06	1.47539e-06	0.0116992
438	2.14417e-05	1.35201e-05	9.01338e-06	0.0714725
439	2.64662e-06	1.66882e-06	1.11255e-06	0.00882207
440	4.60239e-06	2.90203e-06	1.93469e-06	0.0153413
441	1.32596e-05	8.36085e-06	5.5739e-06	0.0441988
442	7.23511e-06	4.56209e-06	3.0414e-06	0.024117
443	8.47117e-06	5.34149e-06	3.56099e-06	0.0282372
444	2.32044e-06	1.46315e-06	9.75432e-07	0.00773478
445	8.63714e-07	5.44614e-07	3.63076e-07	0.00287905
446	6.8881e-06	4.34328e-06	2.89552e-06	0.0229603
447	1.75486e-05	1.10653e-05	7.37684e-06	0.0584954
448	9.04147e-07	5.70109e-07	3.80073e-07	0.00301382
449	2.31454e-06	1.45943e-06	9.72953e-07	0.00771513
450	4.29269e-06	2.70675e-06	1.8045e-06	0.014309
451	4.10291e-06	2.58709e-06	1.72473e-06	0.0136764
452	2.24773e-05	1.4173e-05	9.44868e-06	0.0749242
453	7.34167e-06	4.62928e-06	3.08619e-06	0.0244722
454	3.46747e-06	2.18641e-06	1.45761e-06	0.0115582
455	3.81138e-06	2.40326e-06	1.60218e-06	0.0127046
456	5.97355e-06	3.76662e-06	2.51108e-06	0.0199118
457	1.0347e-05	6.52429e-06	4.34953e-06	0.03449
458	1.09439e-05	6.90067e-06	4.60044e-06	0.0364797
459	1.86289e-05	1.17465e-05	7.83097e-06	0.0620965
460	4.19011e-06	2.64207e-06	1.76138e-06	0.013967
461	1.13344e-05	7.14687e-06	4.76458e-06	0.0377812
462	5.30492e-06	3.34501e-06	2.23001e-06	0.0176831
463	1.92064e-06	1.21106e-06	8.07373e-07	0.00640214
464	4.99999e-06	3.15274e-06	2.10183e-06	0.0166666
465	8.46943e-06	5.34039e-06	3.56026e-06	0.0282314
466	2.86186e-06	1.80454e-06	1.20303e-06	0.00953954
467	1.51171e-06	9.5321e-07	6.35473e-07	0.00503905
468	6.51494e-06	4.10799e-06	2.73866e-06	0.0217165
469	3.60419e-06	2.27262e-06	1.51508e-06	0.012014
470	2.83398e-06	1.78696e-06	1.19131e-06	0.00944659
471	7.12187e-06	4.49069e-06	2.99379e-06	0.0237396
472	6.25638e-06	3.94495e-06	2.62997e-06	0.0208546
473	3.16906e-06	1.99825e-06	1.33216e-06	0.0105635
474	3.05317e-06	1.92517e-06	1.28345e-06	0.0101772
475	1.43283e-05	9.0347e-06	6.02313e-06	0.047761
476	4.28967e-06	2.70485e-06	1.80323e-06	0.0142989
477	7.52675e-06	4.74598e-06	3.16399e-06	0.0250892
478	7.05727e-06	4.44995e-06	2.96664e-06	0.0235242
479	6.52741e-06	4.11585e-06	2.7439e-06	0.021758
480	7.69175e-06	4.85002e-06	3.23335e-06	0.0256392
481	1.38708e-05	8.7462e-06	5.8308e-06	0.0462359
482	9.44522e-06	5.95568e-06	3.97045e-06	0.0314841
483	9.64712e-06	6.08298e-06	4.05532e-06	0.0321571
484	8.52878e-06	5.37781e-06	3.58521e-06	0.0284293
485	2.93443e-05	1.8503e-05	1.23354e-05	0.0978145
486	2.46376e-06	1.55352e-06	1.03568e-06	0.00821252
487	4.32499e-06	2.72712e-06	1.81808e-06	0.0144166
488	1.99767e-05	1.25963e-05	8.39751e-06	0.0665889
489	3.27809e-06	2.06699e-06	1.378e-06	0.010927
490	3.42855e-06	2.16187e-06	1.44124e-06	0.0114285
491	1.38625e-05	8.74101e-06	5.82734e-06	0.0462085
492	1.19389e-05	7.52804e-06	5.0187e-06	0.0397962
493	4.77983e-06	3.01392e-06	2.00928e-06	0.0159328
494	3.04028e-06	1.91705e-06	1.27803e-06	0.0101343
495	4.18075e-06	2.63617e-06	1.75744e-06	0.0139358
496	8.74454e-06	5.51386e-06	3.67591e-06	0.0291485
497	2.72555e-06	1.7186e-06	1.14573e-06	0.00908518
498	8.05275e-06	5.07765e-06	3.3851e-06	0.0268425
499	1.15905e-05	7.3084e-06	4.87227e-06	0.0386351
500	2.9895e-06	1.88502e-06	1.25668e-06	0.00996499
501	1.12499e-06	7.09361e-07	4.72908e-07	0.00374997
502	1.02045e-05	6.43446e-06	4.28964e-06	0.0340151
503	6.47117e-06	4.08039e-06	2.72026e-06	0.0215706
504	2.84197e-06	1.792e-06	1.19467e-06	0.00947324
505	3.26738e-06	2.06025e-06	1.3735e-06	0.0108913
506	2.28602e-06	1.44145e-06	9.60966e-07	0.00762008
507	4.65578e-06	2.9357e-06	1.95713e-06	0.0155193
508	6.90375e-06	4.35315e-06	2.9021e-06	0.0230125
509	8.18271e-06	5.1596e-06	3.43973e-06	0.0272757
510	8.12155e-06	5.12104e-06	3.41402e-06	0.0270718
511	1.52069e-05	9.58872e-06	6.39248e-06	0.0506898
512	5.63609e-06	3.55383e-06	2.36922e-06	0.018787
513	7.0238e-06	4.42885e-06	2.95257e-06	0.0234127
514	1.08665e-05	6.85183e-06	4.56789e-06	0.0362215
515	5.56435e-06	3.50859e-06	2.33906e-06	0.0185478
516	3.82966e-06	2.41479e-06	1.60986e-06	0.0127655
517	3.99616e-06	2.51978e-06	1.67985e-06	0.0133205
518	5.03639e-06	3.17569e-06	2.11713e-06	0.016788
519	4.5936e-06	2.89649e-06	1.93099e-06	0.015312
520	7.56177e-06	4.76807e-06	3.17871e-06	0.0252059
521	2.00924e-05	1.26692e-05	8.44615e-06	0.0669745
522	8.90606e-06	5.61571e-06	3.7438e-06	0.0296869
523	1.99143e-05	1.25569e-05	8.3713e-06	0.066381
524	1.18842e-05	7.49359e-06	4.99572e-06	0.0396141
525	1.06114e-06	6.69102e-07	4.46068e-07	0.00353714
526	2.78019e-06	1.75305e-06	1.1687e-06	0.00926731
527	5.53498e-06	3.49008e-06	2.32672e-06	0.0184499
528	7.19471e-06	4.53662e-06	3.02441e-06	0.0239824
529	9.10324e-06	5.74004e-06	3.82669e-06	0.0303441
530	6.02455e-06	3.79877e-06	2.53252e-06	0.0200818
531	6.86965e-06	4.33165e-06	2.88777e-06	0.0228988
532	7.03819e-06	4.43792e-06	2.95862e-06	0.0234606
533	3.38809e-06	2.13636e-06	1.42424e-06	0.0112936
534	6.42344e-06	4.05029e-06	2.7002e-06	0.0214115
535	9.3947e-06	5.92382e-06	3.94921e-06	0.0313157
536	1.29736e-05	8.18051e-06	5.45368e-06	0.0432455
537	1.77892e-06	1.1217e-06	7.47799e-07	0.00592974
538	4.65322e-06	2.93408e-06	1.95606e-06	0.0155107
539	7.62043e-06	4.80505e-06	3.20337e-06	0.0254014
540	4.02939e-06	2.54073e-06	1.69382e-06	0.0134313
541	8.22514e-06	5.18635e-06	3.45757e-06	0.0274171
542	2.23007e-06	1.40617e-06	9.37447e-07	0.00743358
543	1.18411e-05	7.46642e-06	4.97761e-06	0.0394705
544	7.33391e-06	4.62439e-06	3.08293e-06	0.0244464
545	4.19516e-06	2.64526e-06	1.7635e-06	0.0139839
546	4.99861e-06	3.15187e-06	2.10125e-06	0.016662
547	1.90402e-06	1.20058e-06	8.00384e-07	0.00634672
548	5.33066e-06	3.36124e-06	2.24083e-06	0.0177689
549	1.11789e-05	7.04886e-06	4.69924e-06	0.0372631
550	4.35638e-06	2.74691e-06	1.83127e-06	0.0145213
551	3.7871e-06	2.38795e-06	1.59197e-06	0.0126237
552	7.64808e-06	4.82249e-06	3.21499e-06	0.0254936
553	4.53922e-06	2.8622e-06	1.90813e-06	0.0151307
554	1.91278e-06	1.2061e-06	8.04067e-07	0.00637593
555	1.11149e-05	7.00849e-06	4.67233e-06	0.0370497
556	8.57895e-06	5.40945e-06	3.6063e-06	0.0285965
557	5.74955e-06	3.62537e-06	2.41691e-06	0.0191652
558	5.6177e-06	3.54224e-06	2.36149e-06	0.0187257
559	8.00964e-06	5.05047e-06	3.36698e-06	0.0266988
560	1.93686e-06	1.22129e-06	8.14191e-07	0.0064562
561	1.74778e-05	1.10206e-05	7.34707e-06	0.0582593
562	1.54755e-05	9.75808e-06	6.50538e-06	0.0515851
563	3.65842e-06	2.30681e-06	1.53787e-06	0.0121947
564	1.76362e-05	1.11205e-05	7.41367e-06	0.0587874
565	5.22526e-06	3.29478e-06	2.19652e-06	0.0174175
566	3.71073e-06	2.3398e-06	1.55986e-06	0.0123691
567	8.15583e-07	5.14265e-07	3.42843e-07	0.00271861
568	4.21747e-06	2.65932e-06	1.77288e-06	0.0140582
569	8.41841e-06	5.30822e-06	3.53881e-06	0.0280614
570	6.1832e-06	3.89881e-06	2.59921e-06	0.0206107
571	7.07797e-06	4.463e-06	2.97534e-06	0.0235932
572	6.24249e-06	3.93619e-06	2.62413e-06	0.0208083
573	7.35796e-06	4.63956e-06	3.09304e-06	0.0245265
574	5.6948e-06	3.59085e-06	2.3939e-06	0.0189827
575	1.49673e-06	9.43763e-07	6.29176e-07	0.00498911
576	3.62594e-06	2.28633e-06	1.52422e-06	0.0120865
577	7.86492e-06	4.95922e-06	3.30615e-06	0.0262164
578	1.61447e-06	1.018e-06	6.78668e-07	0.00538156
579	5.24467e-06	3.30702e-06	2.20468e-06	0.0174822
580	5.70524e-06	3.59743e-06	2.39829e-06	0.0190175
581	8.17266e-06	5.15326e-06	3.43551e-06	0.0272422
582	6.01364e-06	3.79189e-06	2.52793e-06	0.0200455
583	1.19229e-05	7.51796e-06	5.01197e-06	0.0397429
584	4.49078e-06	2.83166e-06	1.88777e-06	0.0149693
585	9.58831e-06	6.0459e-06	4.0306e-06	0.031961
586	3.33547e-06	2.10318e-06	1.40212e-06	0.0111182
587	1.52813e-06	9.63558e-07	6.42372e-07	0.00509375
588	6.39144e-06	4.03012e-06	2.68674e-06	0.0213048
589	5.17578e-06	3.26358e-06	2.17572e-06	0.0172526
590	2.11786e-06	1.33541e-06	8.90276e-07	0.00705953
591	8.94433e-06	5.63984e-06	3.75989e-06	0.0298144
592	8.72425e-06	5.50107e-06	3.66738e-06	0.0290808
593	1.25537e-05	7.91571e-06	5.27714e-06	0.0418456
594	3.26681e-06	2.05988e-06	1.37325e-06	0.0108894
595	1.398e-05	8.81509e-06	5.87673e-06	0.0466001
596	1.66745e-05	1.05141e-05	7.00939e-06	0.0555816
597	8.13049e-06	5.12667e-06	3.41778e-06	0.0271016
598	3.29614e-06	2.07838e-06	1.38559e-06	0.0109871
599	4.63553e-06	2.92293e-06	1.94862e-06	0.0154518
600	2.51286e-05	1.58448e-05	1.05632e-05	0.0837621
601	8.80433e-06	5.55156e-06	3.70104e-06	0.0293478
602	1.78753e-05	1.12713e-05	7.51417e-06	0.0595844
603	6.82646e-06	4.30442e-06	2.86961e-06	0.0227549
604	1.12561e-05	7.09749e-06	4.73166e-06	0.0375202
605	6.15528e-06	3.8812e-06	2.58747e-06	0.0205176
606	3.66268e-06	2.3095e-06	1.53967e-06	0.0122089
607	2.80929e-06	1.7714e-06	1.18093e-06	0.0093643
608	4.2727e-06	2.69415e-06	1.7961e-06	0.0142423
609	6.62847e-06	4.17957e-06	2.78638e-06	0.0220949
610	2.21454e-05	1.39638e-05	9.30919e-06	0.0738181
611	2.52092e-06	1.58956e-06	1.05971e-06	0.00840307
612	3.43917e-06	2.16856e-06	1.44571e-06	0.0114639
613	4.78899e-06	3.01969e-06	2.01313e-06	0.0159633
614	6.42088e-06	4.04868e-06	2.69912e-06	0.0214029
615	1.22431e-05	7.71987e-06	5.14658e-06	0.0408103
616	8.87203e-06	5.59425e-06	3.7295e-06	0.0295734
617	8.24378e-06	5.19811e-06	3.46541e-06	0.0274793
618	3.97202e-06	2.50455e-06	1.6697e-06	0.0132401
619	4.07411e-06	2.56893e-06	1.71262e-06	0.0135804
620	1.50055e-05	9.46171e-06	6.30781e-06	0.0500184
621	7.11598e-06	4.48697e-06	2.99131e-06	0.0237199
622	9.04518e-06	5.70343e-06	3.80228e-06	0.0301506
623	1.2194e-06	7.68889e-07	5.12592e-07	0.00406465
624	7.3873e-06	4.65806e-06	3.10537e-06	0.0246243
625	4.54482e-06	2.86573e-06	1.91049e-06	0.0151494
626	8.57109e-06	5.40449e-06	3.603e-06	0.0285703
627	6.31992e-06	3.98502e-06	2.65668e-06	0.0210664
628	4.47458e-06	2.82144e-06	1.88096e-06	0.0149153
629	2.72602e-05	1.71889e-05	1.14593e-05	0.0908675
630	9.73314e-06	6.13722e-06	4.09148e-06	0.0324438
631	2.61932e-06	1.65161e-06	1.10107e-06	0.00873107
632	3.02474e-06	1.90725e-06	1.2715e-06	0.0100825
633	2.34886e-06	1.48107e-06	9.87381e-07	0.00782953
634	7.49535e-06	4.72619e-06	3.15079e-06	0.0249845
635	2.9433e-06	1.85589e-06	1.23726e-06	0.00981099
636	6.73534e-06	4.24696e-06	2.83131e-06	0.0224511
637	4.51217e-06	2.84514e-06	1.89676e-06	0.0150406
638	7.89543e-06	4.97845e-06	3.31897e-06	0.0263181
639	1.08144e-05	6.81901e-06	4.54601e-06	0.036048
640	3.35178e-06	2.11346e-06	1.40897e-06	0.0111726
641	4.2115e-06	2.65556e-06	1.77037e-06	0.0140383
642	4.67704e-06	2.9491e-06	1.96607e-06	0.0155901
643	4.65429e-06	2.93476e-06	1.95651e-06	0.0155143
644	5.64028e-06	3.55647e-06	2.37098e-06	0.0188009
645	5.78418e-06	3.64721e-06	2.43147e-06	0.0192806
646	1.06397e-05	6.70883e-06	4.47255e-06	0.0354656
647	1.57604e-05	9.93773e-06	6.62515e-06	0.0525348
648	6.18384e-06	3.89921e-06	2.59948e-06	0.0206128
649	8.97785e-06	5.66097e-06	3.77398e-06	0.0299262
650	7.88781e-06	4.97365e-06	3.31577e-06	0.0262927
651	2.03155e-06	1.28099e-06	8.53993e-07	0.00677182
652	8.5353e-06	5.38193e-06	3.58795e-06	0.028451
653	2.23651e-06	1.41023e-06	9.40154e-07	0.00745504
654	6.90974e-06	4.35693e-06	2.90462e-06	0.0230325
655	1.82302e-06	1.14951e-06	7.66337e-07	0.00607674
656	6.09731e-06	3.84465e-06	2.5631e-06	0.0203244
657	6.51002e-06	4.10489e-06	2.73659e-06	0.0217001
658	2.45987e-06	1.55107e-06	1.03405e-06	0.00819958
659	3.84395e-06	2.4238e-06	1.61587e-06	0.0128132
660	3.80488e-06	2.39917e-06	1.59944e-06	0.0126829
661	7.78281e-06	4.90745e-06	3.27163e-06	0.0259427
662	1.18861e-05	7.49474e-06	4.9965e-06	0.0396202
663	3.17541e-06	2.00225e-06	1.33483e-06	0.0105847
664	2.04408e-06	1.2889e-06	8.59264e-07	0.00681361
665	5.59568e-06	3.52835e-06	2.35224e-06	0.0186523
666	1.16134e-05	7.32282e-06	4.88188e-06	0.0387114
667	9.28367e-06	5.85381e-06	3.90254e-06	0.0309456
668	7.02153e-06	4.42742e-06	2.95161e-06	0.0234051
669	5.48306e-06	3.45734e-06	2.30489e-06	0.0182769
670	9.21029e-06	5.80754e-06	3.87169e-06	0.030701
671	8.46326e-06	5.3365e-06	3.55766e-06	0.0282109
672	7.05292e-06	4.44721e-06	2.96481e-06	0.0235097
673	1.3006e-05	8.20093e-06	5.46729e-06	0.0433534
674	5.04745e-06	3.18266e-06	2.12178e-06	0.0168248
675	8.26862e-06	5.21377e-06	3.47585e-06	0.0275621
676	6.39269e-06	4.0309e-06	2.68727e-06	0.021309
677	1.72574e-05	1.08817e-05	7.25444e-06	0.0575248
678	4.4655e-06	2.81572e-06	1.87715e-06	0.014885
679	8.6812e-06	5.47392e-06	3.64928e-06	0.0289373
680	1.89583e-06	1.19542e-06	7.96943e-07	0.00631944
681	1.11929e-05	7.05768e-06	4.70512e-06	0.0373097
682	8.32297e-06	5.24804e-06	3.4987e-06	0.0277432
683	9.16219e-06	5.77721e-06	3.85147e-06	0.0305406
684	7.55638e-06	4.76467e-06	3.17645e-06	0.0251879
685	1.41254e-05	8.90678e-06	5.93785e-06	0.0470848
686	5.68746e-06	3.58622e-06	2.39081e-06	0.0189582
687	7.37631e-06	4.65113e-06	3.10075e-06	0.0245877
688	8.9242e-06	5.62715e-06	3.75143e-06	0.0297473
689	6.04311e-06	3.81048e-06	2.54032e-06	0.0201437
690	3.3815e-06	2.1322e-06	1.42147e-06	0.0112717
691	3.61834e-05	2.28154e-05	1.52103e-05	0.120611
692	7.0714e-07	4.45887e-07	2.97258e-07	0.00235713
693	9.87908e-06	6.22924e-06	4.15283e-06	0.0329303
694	6.84351e-06	4.31517e-06	2.87678e-06	0.0228117
695	2.14272e-05	1.35109e-05	9.00727e-06	0.071424
696	8.79125e-06	5.54331e-06	3.69554e-06	0.0293042
697	2.03675e-06	1.28427e-06	8.56181e-07	0.00678917
698	6.32487e-06	3.98814e-06	2.65876e-06	0.0210829
699	1.02596e-05	6.46921e-06	4.31281e-06	0.0341988
700	5.48255e-06	3.45702e-06	2.30468e-06	0.0182752
701	1.50885e-06	9.51404e-07	6.34269e-07	0.0050295
702	3.65111e-06	2.3022e-06	1.5348e-06	0.0121704
703	5.23591e-06	3.3015e-06	2.201e-06	0.017453
704	8.06449e-06	5.08505e-06	3.39004e-06	0.0268816
705	1.5407e-05	9.71486e-06	6.47657e-06	0.0513566
706	4.1863e-06	2.63967e-06	1.75978e-06	0.0139543
707	9.29001e-07	5.85781e-07	3.90521e-07	0.00309667
708	5.64035e-06	3.55652e-06	2.37101e-06	0.0188012
709	9.5298e-06	6.009e-06	4.006e-06	0.031766
710	7.15835e-06	4.51369e-06	3.00913e-06	0.0238612
711	3.16285e-06	1.99433e-06	1.32955e-06	0.0105428
712	4.65199e-06	2.93331e-06	1.95554e-06	0.0155066
713	7.02166e-06	4.4275e-06	2.95167e-06	0.0234055
714	1.43273e-05	9.03405e-06	6.0227e-06	0.0477576
715	9.54589e-06	6.01915e-06	4.01277e-06	0.0318196
716	1.40393e-05	8.85248e-06	5.90166e-06	0.0467978
717	5.141e-06	3.24165e-06	2.1611e-06	0.0171367
718	7.29305e-06	4.59863e-06	3.06575e-06	0.0243102
719	1.06175e-05	6.69483e-06	4.46322e-06	0.0353915
720	1.15998e-05	7.31423e-06	4.87615e-06	0.0386659
721	2.30946e-06	1.45623e-06	9.7082e-07	0.00769821
722	2.5855e-06	1.63028e-06	1.08686e-06	0.00861833
723	7.57575e-06	4.77688e-06	3.18459e-06	0.0252525
724	3.90019e-06	2.45926e-06	1.63951e-06	0.0130006
725	1.32141e-05	8.33211e-06	5.55474e-06	0.0440469
726	6.12965e-06	3.86504e-06	2.5767e-06	0.0204322
727	3.59051e-06	2.26399e-06	1.50933e-06	0.0119684
728	7.32265e-06	4.61729e-06	3.07819e-06	0.0244088
729	4.13363e-06	2.60645e-06	1.73764e-06	0.0137788
730	4.67275e-06	2.9464e-06	1.96426e-06	0.0155758
731	3.24357e-06	2.04523e-06	1.36349e-06	0.0108119
732	7.32126e-06	4.61641e-06	3.07761e-06	0.0244042
733	2.80752e-06	1.77028e-06	1.18018e-06	0.00935839
734	3.73769e-06	2.35679e-06	1.5712e-06	0.012459
735	4.56638e-06	2.87932e-06	1.91955e-06	0.0152213
736	8.89779e-06	5.61049e-06	3.74033e-06	0.0296593
737	6.82913e-06	4.3061e-06	2.87074e-06	0.0227638
738	2.42832e-06	1.53118e-06	1.02078e-06	0.00809441
739	7.82732e-06	4.93551e-06	3.29034e-06	0.0260911
740	1.30571e-06	8.23314e-07	5.48876e-07	0.00435236
741	2.90468e-06	1.83154e-06	1.22103e-06	0.00968226
742	5.25625e-06	3.31433e-06	2.20955e-06	0.0175208
743	1.03509e-05	6.52675e-06	4.35117e-06	0.034503
744	8.91798e-06	5.62322e-06	3.74882e-06	0.0297266
745	5.90976e-06	3.7264e-06	2.48426e-06	0.0196992
746	1.65445e-06	1.04321e-06	6.95476e-07	0.00551484
747	7.12895e-06	4.49515e-06	2.99677e-06	0.0237632
748	9.13963e-06	5.76298e-06	3.84199e-06	0.0304654
749	6.33173e-06	3.99247e-06	2.66165e-06	0.0211058
750	1.96419e-05	1.23852e-05	8.25678e-06	0.0654729
751	4.09858e-06	2.58435e-06	1.7229e-06	0.0136619
752	4.42875e-06	2.79254e-06	1.86169e-06	0.0147625
753	4.9453e-06	3.11826e-06	2.07884e-06	0.0164843
754	2.73896e-06	1.72705e-06	1.15136e-06	0.00912986
755	3.5743e-06	2.25377e-06	1.50251e-06	0.0119143
756	3.08873e-06	1.9476e-06	1.2984e-06	0.0102958
757	1.07324e-05	6.76733e-06	4.51155e-06	0.0357748
758	2.17372e-06	1.37064e-06	9.13757e-07	0.00724573
759	8.65649e-06	5.45834e-06	3.63889e-06	0.028855
760	5.67399e-06	3.57773e-06	2.38515e-06	0.0189133
761	3.79138e-06	2.39065e-06	1.59377e-06	0.0126379
762	1.56498e-05	9.86799e-06	6.57866e-06	0.0521661
763	1.63091e-05	1.02837e-05	6.85577e-06	0.0543635
764	4.06443e-06	2.56282e-06	1.70855e-06	0.0135481
765	7.8662e-07	4.96002e-07	3.30668e-07	0.00262207
766	3.01836e-05	1.90323e-05	1.26882e-05	0.100612
767	4.27693e-06	2.69681e-06	1.79788e-06	0.0142564
768	2.47032e-06	1.55766e-06	1.03844e-06	0.00823441
769	1.17285e-06	7.3954e-07	4.93027e-07	0.0039095
770	8.52179e-06	5.37341e-06	3.58227e-06	0.028406
771	4.54833e-06	2.86794e-06	1.91196e-06	0.0151611
772	6.60394e-06	4.16411e-06	2.77607e-06	0.0220131
773	1.81009e-06	1.14135e-06	7.609e-07	0.00603363
774	5.55401e-06	3.50208e-06	2.33472e-06	0.0185134
775	5.5779e-06	3.51714e-06	2.34476e-06	0.018593
776	5.05508e-06	3.18747e-06	2.12498e-06	0.0168503
777	9.64788e-06	6.08346e-06	4.05564e-06	0.0321596
778	2.69571e-06	1.69978e-06	1.13319e-06	0.00898571
779	1.47518e-05	9.30171e-06	6.20114e-06	0.0491725
780	3.74021e-06	2.35839e-06	1.57226e-06	0.0124674
781	1.5496e-06	9.771e-07	6.514e-07	0.00516534
782	2.23746e-06	1.41083e-06	9.40552e-07	0.0074582
783	8.57579e-06	5.40746e-06	3.60497e-06	0.028586
784	2.28787e-05	1.44261e-05	9.61742e-06	0.0762623
785	1.22561e-05	7.72805e-06	5.15204e-06	0.0408536
786	3.05979e-05	1.92935e-05	1.28623e-05	0.101993
787	1.07515e-05	6.77935e-06	4.51957e-06	0.0358383
788	3.8241e-06	2.41128e-06	1.60752e-06	0.012747
789	1.55526e-06	9.80665e-07	6.53776e-07	0.00518418
790	1.02745e-05	6.4786e-06	4.31907e-06	0.0342485
791	6.343e-06	3.99957e-06	2.66638e-06	0.0211433
792	4.01596e-06	2.53226e-06	1.68818e-06	0.0133865
793	2.79899e-06	1.7649e-06	1.1766e-06	0.00932997
794	3.16658e-06	1.99669e-06	1.33112e-06	0.0105553
795	4.73087e-06	2.98305e-06	1.9887e-06	0.0157696
796	6.13988e-06	3.87149e-06	2.581e-06	0.0204663
797	2.06852e-06	1.30431e-06	8.69537e-07	0.00689508
798	1.07142e-05	6.7558e-06	4.50387e-06	0.0357139
799	2.32843e-06	1.46819e-06	9.78791e-07	0.00776142
800	8.17692e-06	5.15595e-06	3.4373e-06	0.0272564
801	1.20855e-05	7.62052e-06	5.08034e-06	0.0402851
802	2.006e-05	1.26488e-05	8.43254e-06	0.0668667
803	3.02801e-06	1.90931e-06	1.27287e-06	0.0100934
804	1.43758e-05	9.06466e-06	6.0431e-06	0.0479194
805	2.68176e-06	1.69098e-06	1.12732e-06	0.00893921
806	8.45212e-06	5.32948e-06	3.55298e-06	0.0281737
807	2.32486e-06	1.46594e-06	9.7729e-07	0.00774952
808	9.84146e-06	6.20552e-06	4.13702e-06	0.0328049
809	6.13687e-06	3.8696e-06	2.57973e-06	0.0204562
810	7.43875e-06	4.69049e-06	3.127e-06	0.0247958
811	5.28428e-06	3.332e-06	2.22133e-06	0.0176143
812	5.18955e-06	3.27226e-06	2.18151e-06	0.0172985
813	1.42913e-05	9.01135e-06	6.00757e-06	0.0476376
814	7.91012e-06	4.98772e-06	3.32515e-06	0.0263671
815	2.85908e-06	1.80279e-06	1.20186e-06	0.00953026
816	2.76172e-06	1.7414e-06	1.16093e-06	0.00920574
817	6.85444e-06	4.32206e-06	2.88137e-06	0.0228481
818	2.99657e-06	1.88948e-06	1.25966e-06	0.00998856
819	1.7003e-05	1.07212e-05	7.1475e-06	0.0566768
820	9.71337e-06	6.12476e-06	4.08317e-06	0.0323779
821	8.42107e-06	5.3099e-06	3.53993e-06	0.0280702
822	1.69584e-06	1.06931e-06	7.12872e-07	0.00565279
823	2.8563e-06	1.80103e-06	1.20069e-06	0.00952099
824	5.04463e-06	3.18088e-06	2.12059e-06	0.0168154
825	9.38529e-06	5.91788e-06	3.94526e-06	0.0312843
826	7.08168e-06	4.46534e-06	2.9769e-06	0.0236056
827	1.65567e-05	1.04398e-05	6.95986e-06	0.0551889
828	8.90325e-06	5.61393e-06	3.74262e-06	0.0296775
829	8.90195e-06	5.61311e-06	3.74208e-06	0.0296732
830	7.58144e-06	4.78047e-06	3.18698e-06	0.0252715
831	1.37755e-05	8.68612e-06	5.79074e-06	0.0459183
832	4.1026e-06	2.58689e-06	1.72459e-06	0.0136753
833	3.02908e-06	1.90998e-06	1.27332e-06	0.0100969
834	8.26754e-06	5.21309e-06	3.47539e-06	0.0275585
835	1.91679e-06	1.20863e-06	8.05755e-07	0.00638931
836	4.15355e-06	2.61902e-06	1.74601e-06	0.0138452
837	1.13755e-05	7.17279e-06	4.78186e-06	0.0379182
838	7.41514e-06	4.67561e-06	3.11707e-06	0.0247171
839	7.45401e-06	4.70012e-06	3.13341e-06	0.0248467
840	1.23923e-05	7.81393e-06	5.20928e-06	0.0413075
841	5.3915e-06	3.39961e-06	2.2664e-06	0.0179717
842	1.23616e-05	7.7946e-06	5.1964e-06	0.0412054
843	6.65113e-06	4.19386e-06	2.79591e-06	0.0221704
844	3.09683e-06	1.9527e-06	1.3018e-06	0.0103228
845	6.02681e-06	3.8002e-06	2.53346e-06	0.0200894
846	5.08326e-06	3.20524e-06	2.13683e-06	0.0169442
847	9.78378e-06	6.16915e-06	4.11277e-06	0.0326126
848	1.14598e-05	7.22594e-06	4.81729e-06	0.0381992
849	1.14576e-05	7.2246e-06	4.8164e-06	0.0381921
850	1.68965e-05	1.0654e-05	7.1027e-06	0.0563215
851	1.92254e-06	1.21225e-06	8.0817e-07	0.00640846
852	4.98258e-06	3.14176e-06	2.09451e-06	0.0166086
853	1.72838e-06	1.08983e-06	7.26552e-07	0.00576126
854	5.45281e-06	3.43826e-06	2.29218e-06	0.018176
855	5.14407e-06	3.24359e-06	2.16239e-06	0.0171469
856	8.22164e-06	5.18415e-06	3.4561e-06	0.0274055
857	1.67725e-05	1.05759e-05	7.05058e-06	0.0559083
858	5.69132e-06	3.58866e-06	2.39244e-06	0.0189711
859	4.78695e-06	3.0184e-06	2.01227e-06	0.0159565
860	5.33037e-06	3.36106e-06	2.24071e-06	0.0177679
861	2.47322e-06	1.55949e-06	1.03966e-06	0.00824407
862	3.99752e-06	2.52063e-06	1.68042e-06	0.0133251
863	6.85529e-06	4.3226e-06	2.88173e-06	0.022851
864	3.88373e-06	2.44888e-06	1.63259e-06	0.0129458
865	8.58449e-06	5.41294e-06	3.60863e-06	0.028615
866	1.35701e-05	8.55658e-06	5.70439e-06	0.0452335
867	1.65254e-05	1.04201e-05	6.9467e-06	0.0550846
868	5.16103e-06	3.25428e-06	2.16952e-06	0.0172034
869	7.62162e-06	4.80581e-06	3.20387e-06	0.0254054
870	1.44995e-05	9.14265e-06	6.0951e-06	0.0483317
871	6.50644e-06	4.10263e-06	2.73509e-06	0.0216881
872	5.87064e-06	3.70173e-06	2.46782e-06	0.0195688
873	1.2356e-05	7.79106e-06	5.19404e-06	0.0411867
874	8.20684e-06	5.17482e-06	3.44988e-06	0.0273561
875	3.89846e-07	2.45817e-07	1.63878e-07	0.00129949
876	1.05393e-05	6.64552e-06	4.43035e-06	0.0351309
877	4.17402e-06	2.63193e-06	1.75462e-06	0.0139134
878	5.44383e-06	3.4326e-06	2.2884e-06	0.0181461
879	9.25575e-06	5.8362e-06	3.8908e-06	0.0308525
880	3.37025e-06	2.12511e-06	1.41674e-06	0.0112342
881	3.82536e-06	2.41208e-06	1.60805e-06	0.0127512
882	1.86084e-06	1.17335e-06	7.82236e-07	0.00620282
883	4.25673e-06	2.68408e-06	1.78939e-06	0.0141891
884	2.15821e-06	1.36086e-06	9.07239e-07	0.00719404
885	1.14231e-05	7.20283e-06	4.80189e-06	0.0380771
886	6.44371e-06	4.06308e-06	2.70872e-06	0.021479
887	1.55685e-06	9.81667e-07	6.54445e-07	0.00518948
888	8.76502e-06	5.52677e-06	3.68452e-06	0.0292167
889	1.72362e-06	1.08682e-06	7.2455e-07	0.00574539
890	4.31581e-06	2.72133e-06	1.81422e-06	0.014386
891	4.85262e-06	3.05982e-06	2.03988e-06	0.0161754
892	5.88646e-06	3.7117e-06	2.47447e-06	0.0196215
893	1.905e-05	1.2012e-05	8.00798e-06	0.0635
894	4.61875e-06	2.91235e-06	1.94156e-06	0.0153958
895	1.33425e-05	8.4131e-06	5.60873e-06	0.044475
896	7.65843e-05	4.82901e-05	3.21934e-05	0.255281
897	8.17752e-06	5.15632e-06	3.43755e-06	0.0272584
898	8.24162e-06	5.19675e-06	3.4645e-06	0.0274721
899	7.4068e-06	4.67035e-06	3.11357e-06	0.0246893
900	6.65072e-06	4.19361e-06	2.79574e-06	0.0221691
901	7.92791e-06	4.99893e-06	3.33262e-06	0.0264264
902	7.17749e-06	4.52576e-06	3.01717e-06	0.023925
903	7.38668e-06	4.65766e-06	3.10511e-06	0.0246223
904	4.03567e-06	2.54469e-06	1.69646e-06	0.0134522
905	1.03199e-05	6.50723e-06	4.33815e-06	0.0343998
906	8.29532e-06	5.23061e-06	3.48707e-06	0.0276511
907	1.21388e-05	7.65408e-06	5.10272e-06	0.0404625
908	1.086e-05	6.84775e-06	4.56517e-06	0.0362
909	1.1032e-05	6.95619e-06	4.63746e-06	0.0367732
910	6.09512e-06	3.84327e-06	2.56218e-06	0.0203171
911	1.87955e-06	1.18515e-06	7.90098e-07	0.00626516
912	5.4866e-06	3.45957e-06	2.30638e-06	0.0182887
913	1.73466e-06	1.09379e-06	7.29191e-07	0.00578219
914	1.69651e-05	1.06973e-05	7.13155e-06	0.0565503
915	9.35443e-06	5.89843e-06	3.93229e-06	0.0311814
916	1.23772e-06	7.80445e-07	5.20297e-07	0.00412574
917	7.6968e-06	4.85321e-06	3.23547e-06	0.025656
918	1.30217e-05	8.2108e-06	5.47387e-06	0.0434056
919	1.16199e-05	7.32692e-06	4.88461e-06	0.038733
920	7.52092e-06	4.74231e-06	3.16154e-06	0.0250697
921	1.10046e-05	6.93893e-06	4.62595e-06	0.036682
922	3.26932e-06	2.06147e-06	1.37431e-06	0.0108977
923	8.92371e-06	5.62684e-06	3.75123e-06	0.0297457
924	6.50024e-06	4.09872e-06	2.73248e-06	0.0216675
925	1.25725e-05	7.92759e-06	5.28506e-06	0.0419084
926	1.71933e-06	1.08412e-06	7.22746e-07	0.00573109
927	6.29472e-06	3.96913e-06	2.64609e-06	0.0209824
928	1.47241e-05	9.28428e-06	6.18952e-06	0.0490804
929	4.73142e-06	2.98339e-06	1.98893e-06	0.0157714
930	6.10734e-06	3.85098e-06	2.56732e-06	0.0203578
931	6.89074e-06	4.34495e-06	2.89663e-06	0.0229691
932	5.29808e-06	3.3407e-06	2.22713e-06	0.0176603
933	1.08627e-05	6.84949e-06	4.56632e-06	0.0362091
934	1.00963e-05	6.36621e-06	4.24414e-06	0.0336543
935	1.63491e-05	1.03089e-05	6.87263e-06	0.0544972
936	1.1828e-05	7.45815e-06	4.9721e-06	0.0394268
937	1.26233e-05	7.95959e-06	5.3064e-06	0.0420776
938	2.23101e-06	1.40676e-06	9.3784e-07	0.00743669
939	4.90108e-06	3.09037e-06	2.06025e-06	0.0163369
940	2.00895e-06	1.26674e-06	8.44495e-07	0.00669651
941	5.66715e-06	3.57341e-06	2.38228e-06	0.0188905
942	4.33461e-06	2.73318e-06	1.82212e-06	0.0144487
943	4.48979e-06	2.83103e-06	1.88735e-06	0.014966
944	4.11289e-06	2.59338e-06	1.72892e-06	0.0137096
945	8.93676e-06	5.63507e-06	3.75671e-06	0.0297892
946	2.41047e-06	1.51992e-06	1.01328e-06	0.00803491
947	4.95703e-06	3.12565e-06	2.08377e-06	0.0165234
948	6.80874e-06	4.29324e-06	2.86216e-06	0.0226958
949	9.99755e-07	6.30395e-07	4.20263e-07	0.00333252
950	8.11463e-06	5.11667e-06	3.41111e-06	0.0270488
951	1.21786e-05	7.67923e-06	5.11949e-06	0.0405955
952	3.22234e-06	2.03184e-06	1.35456e-06	0.0107411
953	8.3137e-06	5.24219e-06	3.4948e-06	0.0277123
954	2.75754e-05	1.73877e-05	1.15918e-05	0.0919181
955	8.85495e-06	5.58348e-06	3.72232e-06	0.0295165
956	6.11557e-06	3.85617e-06	2.57078e-06	0.0203852
957	2.98284e-06	1.88083e-06	1.25388e-06	0.00994279
958	8.9633e-06	5.6518e-06	3.76787e-06	0.0298777
959	2.20471e-06	1.39018e-06	9.26784e-07	0.00734903
960	5.28509e-06	3.33251e-06	2.22167e-06	0.017617
961	1.09217e-05	6.88667e-06	4.59111e-06	0.0364057
962	1.07994e-05	6.80955e-06	4.5397e-06	0.035998
963	9.25333e-06	5.83468e-06	3.88978e-06	0.0308444
964	4.45812e-06	2.81107e-06	1.87404e-06	0.0148604
965	1.0652e-05	6.71661e-06	4.47774e-06	0.0355067
966	8.55121e-06	5.39196e-06	3.59464e-06	0.028504
967	4.87751e-06	3.07551e-06	2.05034e-06	0.0162584
968	6.37108e-06	4.01728e-06	2.67819e-06	0.0212369
969	3.90966e-06	2.46523e-06	1.64349e-06	0.0130322
970	1.50019e-05	9.45943e-06	6.30629e-06	0.0500063
971	6.11031e-06	3.85285e-06	2.56857e-06	0.0203677
972	2.4199e-05	1.52587e-05	1.01724e-05	0.0806633
973	1.28699e-05	8.11512e-06	5.41008e-06	0.0428997
974	1.67332e-06	1.05511e-06	7.03406e-07	0.00557773
975	7.92439e-06	4.99672e-06	3.33114e-06	0.0264146
976	3.88987e-06	2.45275e-06	1.63517e-06	0.0129662
977	9.34114e-06	5.89005e-06	3.9267e-06	0.0311371
978	4.55217e-06	2.87037e-06	1.91358e-06	0.0151739
979	4.59401e-06	2.89675e-06	1.93117e-06	0.0153134
980	6.99296e-06	4.4094e-06	2.9396e-06	0.0233099
981	4.52646e-06	2.85416e-06	1.90277e-06	0.0150882
982	1.84979e-05	1.16638e-05	7.7759e-06	0.0616597
983	1.63637e-05	1.03181e-05	6.87874e-06	0.0545456
984	2.50107e-06	1.57705e-06	1.05137e-06	0.00833691
985	4.85512e-06	3.06139e-06	2.04093e-06	0.0161837
986	1.45965e-06	9.2038e-07	6.13587e-07	0.0048655
987	6.59557e-06	4.15883e-06	2.77256e-06	0.0219852
988	5.5393e-06	3.4928e-06	2.32853e-06	0.0184643
989	3.80875e-06	2.4016e-06	1.60107e-06	0.0126958
990	1.11781e-05	7.04832e-06	4.69888e-06	0.0372602
991	7.01883e-06	4.42572e-06	2.95048e-06	0.0233961
992	1.19579e-06	7.54004e-07	5.0267e-07	0.00398597
993	4.80416e-06	3.02926e-06	2.01951e-06	0.0160139
994	7.45306e-06	4.69952e-06	3.13302e-06	0.0248435
995	4.30576e-06	2.71499e-06	1.80999e-06	0.0143525
996	5.13726e-06	3.23929e-06	2.15953e-06	0.0171242
997	2.85213e-06	1.79841e-06	1.19894e-06	0.00950711
998	5.8195e-06	3.66948e-06	2.44632e-06	0.0193983
999	3.36908e-06	2.12437e-06	1.41625e-06	0.0112303
1000	4.6621e-06	2.93969e-06	1.95979e-06	0.0155403
1001	1.25959e-05	7.94231e-06	5.29487e-06	0.0419862
1002	7.84121e-06	4.94427e-06	3.29618e-06	0.0261374
1003	6.62728e-06	4.17882e-06	2.78588e-06	0.0220909
1004	9.00365e-06	5.67724e-06	3.78483e-06	0.0300122
1005	1.8363e-06	1.15788e-06	7.7192e-07	0.00612102
1006	3.88498e-06	2.44967e-06	1.63312e-06	0.0129499
1007	1.24693e-05	7.86253e-06	5.24169e-06	0.0415645
1008	8.31074e-06	5.24033e-06	3.49355e-06	0.0277025
1009	1.34823e-05	8.50127e-06	5.66751e-06	0.0449411
1010	1.9637e-06	1.23821e-06	8.25471e-07	0.00654566
1011	9.44406e-06	5.95494e-06	3.96996e-06	0.0314802
1012	1.08912e-05	6.86743e-06	4.57829e-06	0.036304
1013	1.90579e-05	1.2017e-05	8.0113e-06	0.0635264
1014	3.68703e-06	2.32485e-06	1.5499e-06	0.0122901
1015	7.59106e-06	4.78654e-06	3.19102e-06	0.0253035
1016	2.31038e-06	1.45681e-06	9.71207e-07	0.00770128
1017	2.57955e-06	1.62653e-06	1.08436e-06	0.0085985
1018	7.21418e-06	4.54889e-06	3.0326e-06	0.0240473
1019	9.30344e-06	5.86627e-06	3.91085e-06	0.0310115
1020	6.76217e-06	4.26388e-06	2.84259e-06	0.0225406
1021	7.0337e-06	4.43509e-06	2.95673e-06	0.0234457
1022	1.35472e-06	8.54221e-07	5.6948e-07	0.00451575
1023	1.40467e-05	8.85716e-06	5.90477e-06	0.0468225
1024	2.2691e-05	1.43078e-05	9.53853e-06	0.0756367
1025	5.93371e-06	3.74149e-06	2.49433e-06	0.019779
1026	7.75713e-06	4.89125e-06	3.26083e-06	0.0258571
1027	4.19917e-06	2.64778e-06	1.76519e-06	0.0139972
1028	1.09895e-05	6.92942e-06	4.61961e-06	0.0366317
1029	3.66115e-06	2.30853e-06	1.53902e-06	0.0122038
1030	1.01366e-05	6.3916e-06	4.26107e-06	0.0337885
1031	5.65726e-06	3.56718e-06	2.37812e-06	0.0188575
1032	2.41972e-06	1.52575e-06	1.01717e-06	0.00806573
1033	6.64966e-06	4.19294e-06	2.79529e-06	0.0221655
1034	1.5212e-05	9.5919e-06	6.3946e-06	0.0507066
1035	5.94525e-06	3.74877e-06	2.49918e-06	0.0198175
1036	8.05688e-06	5.08026e-06	3.38684e-06	0.0268563
1037	7.58406e-06	4.78212e-06	3.18808e-06	0.0252802
1038	3.31399e-06	2.08963e-06	1.39309e-06	0.0110466
1039	1.27584e-05	8.04479e-06	5.3632e-06	0.042528
1040	1.41447e-06	8.91894e-07	5.94596e-07	0.00471491
1041	3.97782e-06	2.50821e-06	1.67214e-06	0.0132594
1042	5.49494e-06	3.46483e-06	2.30989e-06	0.0183165
1043	2.11323e-06	1.33249e-06	8.88329e-07	0.00704409
1044	3.02839e-06	1.90955e-06	1.27303e-06	0.0100946
1045	2.10836e-06	1.32942e-06	8.86281e-07	0.00702785
1046	1.33846e-05	8.43966e-06	5.62644e-06	0.0446154
1047	1.27408e-05	8.03371e-06	5.35581e-06	0.0424694
1048	2.24958e-06	1.41847e-06	9.45645e-07	0.00749859
1049	8.67695e-06	5.47124e-06	3.64749e-06	0.0289232
1050	1.39839e-06	8.81756e-07	5.87837e-07	0.00466131
1051	3.18365e-06	2.00745e-06	1.3383e-06	0.0106122
1052	9.84879e-06	6.21015e-06	4.1401e-06	0.0328293
1053	4.63892e-06	2.92506e-06	1.95004e-06	0.0154631
1054	4.35172e-06	2.74397e-06	1.82931e-06	0.0145057
1055	1.12679e-05	7.10495e-06	4.73664e-06	0.0375596
1056	1.4896e-05	9.39267e-06	6.26178e-06	0.0496534
1057	7.12025e-06	4.48967e-06	2.99311e-06	0.0237342
1058	2.43229e-06	1.53368e-06	1.02245e-06	0.00810763
1059	8.52451e-06	5.37512e-06	3.58341e-06	0.028415
1060	3.2392e-06	2.04247e-06	1.36165e-06	0.0107973
1061	2.3354e-05	1.47259e-05	9.81724e-06	0.0778468
1062	7.5577e-06	4.7655e-06	3.177e-06	0.0251923
1063	3.34916e-06	2.11181e-06	1.40787e-06	0.0111639
1064	1.0253e-05	6.46501e-06	4.31001e-06	0.0341766
1065	4.78721e-06	3.01857e-06	2.01238e-06	0.0159574
1066	5.50014e-06	3.46811e-06	2.31207e-06	0.0183338
1067	4.61528e-06	2.91016e-06	1.94011e-06	0.0153843
1068	5.79144e-06	3.65178e-06	2.43452e-06	0.0193048
1069	7.3848e-06	4.65648e-06	3.10432e-06	0.024616
1070	2.8094e-06	1.77146e-06	1.18097e-06	0.00936465
1071	6.19389e-06	3.90555e-06	2.6037e-06	0.0206463
1072	4.98246e-06	3.14168e-06	2.09446e-06	0.0166082
1073	1.39753e-05	8.81213e-06	5.87475e-06	0.0465844
1074	1.01424e-05	6.3953e-06	4.26353e-06	0.0338081
1075	1.4293e-06	9.01243e-07	6.00828e-07	0.00476433
1076	1.32795e-05	8.37334e-06	5.58223e-06	0.0442648
1077	4.13197e-06	2.60541e-06	1.73694e-06	0.0137732
1078	3.41561e-06	2.15371e-06	1.43581e-06	0.0113854
1079	2.17884e-05	1.37386e-05	9.15909e-06	0.0726279
1080	1.06532e-06	6.71734e-07	4.47823e-07	0.00355105
1081	1.26378e-05	7.96873e-06	5.31249e-06	0.0421259
1082	2.77269e-06	1.74831e-06	1.16554e-06	0.00924228
1083	1.21639e-05	7.66993e-06	5.11329e-06	0.0405463
1084	1.14611e-05	7.22676e-06	4.81784e-06	0.0382035
1085	6.70482e-06	4.22772e-06	2.81848e-06	0.0223494
1086	1.43666e-05	9.05885e-06	6.03923e-06	0.0478887
1087	9.14502e-06	5.76638e-06	3.84425e-06	0.0304834
1088	4.56661e-06	2.87947e-06	1.91965e-06	0.015222
1089	4.38513e-06	2.76504e-06	1.84336e-06	0.0146171
1090	2.76097e-06	1.74092e-06	1.16062e-06	0.00920322
1091	1.27209e-05	8.02114e-06	5.34742e-06	0.0424029
1092	4.28491e-06	2.70184e-06	1.80123e-06	0.014283
1093	3.54932e-06	2.23802e-06	1.49202e-06	0.0118311
1094	1.23116e-05	7.76304e-06	5.17536e-06	0.0410385
1095	2.31288e-06	1.45839e-06	9.72257e-07	0.00770961
1096	7.96395e-06	5.02166e-06	3.34777e-06	0.0265465
1097	2.86058e-06	1.80373e-06	1.20249e-06	0.00953526
1098	4.11334e-06	2.59366e-06	1.72911e-06	0.0137111
1099	7.10239e-06	4.47841e-06	2.98561e-06	0.0236746
1100	7.01297e-06	4.42202e-06	2.94801e-06	0.0233766
1101	5.26075e-06	3.31716e-06	2.21144e-06	0.0175358
1102	7.08946e-06	4.47025e-06	2.98017e-06	0.0236315
1103	9.02047e-06	5.68785e-06	3.7919e-06	0.0300682
1104	2.28403e-06	1.4402e-06	9.60131e-07	0.00761345
1105	4.27616e-06	2.69633e-06	1.79755e-06	0.0142539
1106	6.79299e-06	4.28332e-06	2.85554e-06	0.0226433
1107	9.09385e-06	5.73412e-06	3.82275e-06	0.0303128
1108	1.9125e-06	1.20592e-06	8.0395e-07	0.006375
1109	7.63822e-06	4.81627e-06	3.21085e-06	0.0254607
1110	6.06973e-06	3.82726e-06	2.55151e-06	0.0202324
1111	1.41515e-06	8.92323e-07	5.94882e-07	0.00471717
1112	3.99478e-06	2.51891e-06	1.67927e-06	0.0133159
1113	5.43993e-06	3.43014e-06	2.28676e-06	0.0181331
1114	1.12509e-05	7.09423e-06	4.72949e-06	0.0375029
1115	9.60791e-06	6.05826e-06	4.03884e-06	0.0320264
1116	1.92162e-05	1.21167e-05	8.07782e-06	0.0640539
1117	2.4609e-06	1.55172e-06	1.03448e-06	0.00820301
1118	9.3738e-06	5.91064e-06	3.94043e-06	0.031246
1119	1.70784e-05	1.07688e-05	7.17917e-06	0.0569279
1120	4.98838e-06	3.14542e-06	2.09694e-06	0.0166279
1121	6.33733e-06	3.99599e-06	2.664e-06	0.0211244
1122	7.30988e-06	4.60924e-06	3.07282e-06	0.0243663
1123	1.81016e-05	1.14139e-05	7.60929e-06	0.0603386
1124	5.31285e-06	3.35001e-06	2.23334e-06	0.0177095
1125	1.59251e-05	1.00415e-05	6.69435e-06	0.0530835
1126	1.26841e-05	7.99792e-06	5.33195e-06	0.0422802
1127	5.95561e-06	3.7553e-06	2.50353e-06	0.019852
1128	1.3366e-05	8.42794e-06	5.61863e-06	0.0445535
1129	7.18599e-06	4.53112e-06	3.02075e-06	0.0239533
1130	3.73891e-06	2.35757e-06	1.57171e-06	0.012463
1131	2.36775e-06	1.49298e-06	9.9532e-07	0.00789249
1132	1.37486e-06	8.66919e-07	5.77946e-07	0.00458288
1133	1.17682e-05	7.42041e-06	4.94694e-06	0.0392273
1134	5.52396e-06	3.48313e-06	2.32209e-06	0.0184132
1135	4.11399e-06	2.59407e-06	1.72938e-06	0.0137133
1136	5.4005e-06	3.40528e-06	2.27019e-06	0.0180017
1137	1.38471e-06	8.73127e-07	5.82085e-07	0.0046157
1138	9.61037e-06	6.05981e-06	4.03987e-06	0.0320346
1139	9.01747e-06	5.68596e-06	3.79064e-06	0.0300582
1140	5.88688e-06	3.71197e-06	2.47465e-06	0.0196229
1141	5.3575e-06	3.37817e-06	2.25211e-06	0.0178583
1142	7.73067e-06	4.87456e-06	3.24971e-06	0.0257689
1143	1.53286e-05	9.66544e-06	6.44363e-06	0.0510954
1144	1.08464e-05	6.83922e-06	4.55948e-06	0.0361548
1145	3.0014e-06	1.89253e-06	1.26169e-06	0.0100047
1146	5.4329e-06	3.42571e-06	2.28381e-06	0.0181097
1147	6.42059e-06	4.0485e-06	2.699e-06	0.021402
1148	3.13956e-06	1.97965e-06	1.31977e-06	0.0104652
1149	9.32542e-06	5.88014e-06	3.92009e-06	0.0310847
1150	2.16119e-06	1.36274e-06	9.08491e-07	0.00720397
1151	4.34774e-06	2.74147e-06	1.82764e-06	0.0144925
1152	3.24729e-06	2.04757e-06	1.36505e-06	0.0108243
1153	6.31915e-06	3.98453e-06	2.65636e-06	0.0210638
1154	6.36905e-06	4.016e-06	2.67733e-06	0.0212302
1155	1.25757e-05	7.92963e-06	5.28642e-06	0.0419192
1156	1.00936e-06	6.3645e-07	4.243e-07	0.00336453
1157	4.77668e-06	3.01193e-06	2.00795e-06	0.0159223
1158	6.24953e-06	3.94064e-06	2.62709e-06	0.0208318
1159	1.03977e-05	6.55628e-06	4.37085e-06	0.0346591
1160	6.50658e-06	4.10272e-06	2.73515e-06	0.0216886
1161	7.85588e-06	4.95352e-06	3.30235e-06	0.0261863
1162	1.38071e-05	8.70606e-06	5.80404e-06	0.0460237
1163	1.08311e-05	6.82952e-06	4.55301e-06	0.0361035
1164	6.11283e-06	3.85444e-06	2.56963e-06	0.0203761
1165	4.8513e-06	3.05898e-06	2.03932e-06	0.016171
1166	4.29707e-06	2.70951e-06	1.80634e-06	0.0143236
1167	6.83316e-06	4.30864e-06	2.87243e-06	0.0227772
1168	6.31835e-06	3.98403e-06	2.65602e-06	0.0210612
1169	8.52303e-06	5.37419e-06	3.58279e-06	0.0284101
1170	2.04486e-05	1.28938e-05	8.59589e-06	0.068162
1171	1.02994e-05	6.49429e-06	4.32953e-06	0.0343314
1172	1.54376e-05	9.73419e-06	6.48946e-06	0.0514588
1173	2.43748e-06	1.53695e-06	1.02463e-06	0.00812492
1174	4.02828e-07	2.54003e-07	1.69335e-07	0.00134276
1175	3.84068e-06	2.42174e-06	1.61449e-06	0.0128023
1176	7.83745e-06	4.9419e-06	3.2946e-06	0.0261248
1177	3.92253e-06	2.47335e-06	1.6489e-06	0.0130751
1178	6.97467e-06	4.39787e-06	2.93191e-06	0.0232489
1179	2.2244e-06	1.4026e-06	9.35064e-07	0.00741468
1180	7.02991e-06	4.4327e-06	2.95513e-06	0.023433
1181	6.46145e-06	4.07426e-06	2.71618e-06	0.0215382
1182	1.34848e-05	8.50283e-06	5.66855e-06	0.0449493
1183	4.64009e-06	2.92581e-06	1.95054e-06	0.015467
1184	3.42372e-06	2.15883e-06	1.43922e-06	0.0114124
1185	2.19907e-06	1.38662e-06	9.24416e-07	0.00733024
1186	5.30531e-06	3.34526e-06	2.23017e-06	0.0176844
1187	1.66566e-05	1.05028e-05	7.00186e-06	0.0555219
1188	5.8734e-06	3.70347e-06	2.46898e-06	0.019578
1189	4.3654e-06	2.7526e-06	1.83506e-06	0.0145513
1190	4.31018e-06	2.71778e-06	1.81185e-06	0.0143673
1191	1.79025e-06	1.12884e-06	7.5256e-07	0.0059675
1192	2.36452e-05	1.49094e-05	9.93962e-06	0.0788172
1193	6.91009e-06	4.35715e-06	2.90477e-06	0.0230336
1194	8.41503e-06	5.30609e-06	3.53739e-06	0.0280501
1195	7.53198e-06	4.74928e-06	3.16619e-06	0.0251066
1196	1.54898e-05	9.76706e-06	6.51137e-06	0.0516326
1197	1.22537e-05	7.72658e-06	5.15105e-06	0.0408458
1198	3.21965e-06	2.03015e-06	1.35343e-06	0.0107322
1199	4.26765e-06	2.69096e-06	1.79397e-06	0.0142255
1200	3.34285e-06	2.10783e-06	1.40522e-06	0.0111428
1201	3.74048e-06	2.35856e-06	1.57237e-06	0.0124683
1202	3.3181e-06	2.09222e-06	1.39482e-06	0.0110603
1203	1.31279e-06	8.27778e-07	5.51852e-07	0.00437597
1204	1.5011e-06	9.46516e-07	6.31011e-07	0.00500366
1205	9.87862e-07	6.22895e-07	4.15264e-07	0.00329287
1206	4.40725e-06	2.77899e-06	1.85266e-06	0.0146908
1207	2.99942e-06	1.89128e-06	1.26085e-06	0.00999806
1208	3.95234e-06	2.49214e-06	1.66143e-06	0.0131745
1209	4.66931e-06	2.94423e-06	1.96282e-06	0.0155644
1210	1.74723e-06	1.10172e-06	7.34477e-07	0.00582411
1211	3.85388e-06	2.43006e-06	1.62004e-06	0.0128463
1212	5.84875e-06	3.68792e-06	2.45861e-06	0.0194958
1213	5.69906e-06	3.59354e-06	2.39569e-06	0.0189969
1214	7.81914e-06	4.93035e-06	3.2869e-06	0.0260638
1215	8.15346e-06	5.14115e-06	3.42744e-06	0.0271782
1216	1.4883e-05	9.38443e-06	6.25629e-06	0.0496098
1217	8.56232e-06	5.39896e-06	3.59931e-06	0.0285411
1218	2.79656e-06	1.76337e-06	1.17558e-06	0.00932186
1219	1.10003e-05	6.93624e-06	4.62416e-06	0.0366677
1220	4.56502e-06	2.87847e-06	1.91898e-06	0.0152167
1221	4.0345e-06	2.54395e-06	1.69597e-06	0.0134483
1222	5.7823e-06	3.64602e-06	2.43068e-06	0.0192743
1223	1.31956e-06	8.32044e-07	5.54696e-07	0.00439852
1224	5.83729e-06	3.6807e-06	2.4538e-06	0.0194576
1225	1.25512e-05	7.91416e-06	5.27611e-06	0.0418374
1226	4.1947e-06	2.64496e-06	1.76331e-06	0.0139823
1227	8.97156e-06	5.65701e-06	3.77134e-06	0.0299052
1228	6.23714e-06	3.93282e-06	2.62188e-06	0.0207905
1229	4.59774e-06	2.8991e-06	1.93273e-06	0.0153258
1230	2.54888e-06	1.6072e-06	1.07146e-06	0.00849628
1231	8.47434e-06	5.34349e-06	3.56233e-06	0.0282478
1232	6.23241e-06	3.92984e-06	2.61989e-06	0.0207747
1233	2.24064e-05	1.41283e-05	9.41888e-06	0.0746879
1234	6.75597e-06	4.25997e-06	2.83998e-06	0.0225199
1235	8.00968e-06	5.05049e-06	3.367e-06	0.0266989
1236	7.6633e-06	4.83209e-06	3.22139e-06	0.0255443
1237	7.49299e-06	4.7247e-06	3.1498e-06	0.0249766
1238	3.09681e-06	1.95269e-06	1.30179e-06	0.0103227
1239	1.30445e-05	8.2252e-06	5.48347e-06	0.0434817
1240	6.24527e-06	3.93795e-06	2.6253e-06	0.0208176
1241	6.27411e-06	3.95614e-06	2.63742e-06	0.0209137
1242	9.99874e-06	6.3047e-06	4.20313e-06	0.0333291
1243	5.70932e-06	3.60001e-06	2.4e-06	0.0190311
1244	1.35543e-05	8.54667e-06	5.69778e-06	0.0451811
1245	1.10724e-05	6.9817e-06	4.65447e-06	0.0369081
1246	1.65558e-05	1.04392e-05	6.95949e-06	0.055186
1247	1.08687e-05	6.85324e-06	4.56882e-06	0.0362289
1248	1.87286e-05	1.18093e-05	7.87288e-06	0.0624288
1249	1.1217e-05	7.07288e-06	4.71526e-06	0.0373901
1250	2.3914e-06	1.5079e-06	1.00527e-06	0.00797135
1251	7.75006e-06	4.88679e-06	3.25786e-06	0.0258335
1252	9.42204e-06	5.94106e-06	3.96071e-06	0.0314068
1253	8.85488e-06	5.58344e-06	3.72229e-06	0.0295163
1254	5.41162e-06	3.41229e-06	2.27486e-06	0.0180387
1255	6.65423e-06	4.19582e-06	2.79721e-06	0.0221808
1256	4.91159e-06	3.097e-06	2.06467e-06	0.016372
1257	5.12691e-06	3.23277e-06	2.15518e-06	0.0170897
1258	1.08911e-05	6.8674e-06	4.57827e-06	0.0363038
1259	8.35966e-06	5.27118e-06	3.51412e-06	0.0278655
1260	6.50321e-06	4.10059e-06	2.73373e-06	0.0216774
1261	4.48794e-06	2.82987e-06	1.88658e-06	0.0149598
1262	4.64944e-06	2.9317e-06	1.95447e-06	0.0154981
1263	2.88668e-06	1.82019e-06	1.21346e-06	0.00962227
1264	2.07356e-05	1.30748e-05	8.71654e-06	0.0691187
1265	7.48201e-07	4.71778e-07	3.14518e-07	0.002494
1266	8.66854e-06	5.46594e-06	3.64396e-06	0.0288951
1267	9.71568e-06	6.12621e-06	4.08414e-06	0.0323856
1268	3.45451e-06	2.17824e-06	1.45216e-06	0.011515
1269	6.14451e-06	3.87442e-06	2.58295e-06	0.0204817
1270	8.13913e-06	5.13212e-06	3.42141e-06	0.0271304
1271	5.91542e-06	3.72996e-06	2.48664e-06	0.0197181
1272	1.48361e-05	9.35491e-06	6.23661e-06	0.0494538
1273	1.22911e-05	7.75016e-06	5.16677e-06	0.0409704
1274	7.82716e-06	4.93541e-06	3.29027e-06	0.0260905
1275	4.39703e-06	2.77254e-06	1.84836e-06	0.0146568
1276	4.21875e-06	2.66013e-06	1.77342e-06	0.0140625
1277	4.32977e-06	2.73013e-06	1.82009e-06	0.0144326
1278	7.69208e-06	4.85023e-06	3.23349e-06	0.0256403
1279	8.14552e-06	5.13615e-06	3.4241e-06	0.0271517
1280	3.10483e-06	1.95774e-06	1.30516e-06	0.0103494
1281	1.58757e-05	1.00104e-05	6.67362e-06	0.0529191
1282	2.66676e-06	1.68152e-06	1.12102e-06	0.00888921
1283	5.28082e-06	3.32981e-06	2.21988e-06	0.0176027
1284	1.34307e-05	8.46874e-06	5.64583e-06	0.0447691
1285	1.7889e-05	1.12799e-05	7.51994e-06	0.0596301
1286	6.77667e-06	4.27302e-06	2.84868e-06	0.0225889
1287	6.10491e-06	3.84944e-06	2.5663e-06	0.0203497
1288	7.01429e-06	4.42286e-06	2.94857e-06	0.023381
1289	1.90053e-05	1.19838e-05	7.98919e-06	0.0633511
1290	1.74742e-05	1.10183e-05	7.34555e-06	0.0582472
1291	1.30661e-06	8.23882e-07	5.49255e-07	0.00435537
1292	3.22355e-06	2.03261e-06	1.35507e-06	0.0107452
1293	1.44795e-05	9.13e-06	6.08667e-06	0.0482648
1294	1.25068e-05	7.88617e-06	5.25745e-06	0.0416895
1295	5.82528e-06	3.67312e-06	2.44875e-06	0.0194176
1296	2.39015e-05	1.50711e-05	1.00474e-05	0.0796716
1297	8.23123e-06	5.1902e-06	3.46013e-06	0.0274374
1298	1.2455e-05	7.85352e-06	5.23568e-06	0.0415168
1299	1.24256e-05	7.83495e-06	5.2233e-06	0.0414187
1300	4.39025e-06	2.76827e-06	1.84551e-06	0.0146342
1301	8.33546e-06	5.25592e-06	3.50394e-06	0.0277849
1302	1.04161e-05	6.56784e-06	4.37856e-06	0.0347202
1303	2.97594e-06	1.87648e-06	1.25098e-06	0.00991981
1304	1.54833e-05	9.763e-06	6.50867e-06	0.0516111
1305	4.55597e-06	2.87276e-06	1.91518e-06	0.0151866
1306	9.12272e-06	5.75232e-06	3.83488e-06	0.0304091
1307	3.9977e-06	2.52075e-06	1.6805e-06	0.0133257
1308	2.26234e-06	1.42652e-06	9.5101e-07	0.00754113
1309	1.45185e-05	9.15464e-06	6.10309e-06	0.0483951
1310	3.7997e-06	2.3959e-06	1.59727e-06	0.0126657
1311	1.09969e-05	6.93407e-06	4.62271e-06	0.0366562
1312	5.95581e-06	3.75543e-06	2.50362e-06	0.0198527
1313	2.17146e-05	1.36921e-05	9.12809e-06	0.0723821
1314	8.03942e-06	5.06925e-06	3.3795e-06	0.0267981
1315	6.27049e-06	3.95385e-06	2.6359e-06	0.0209016
1316	7.58588e-06	4.78327e-06	3.18884e-06	0.0252863
1317	9.79755e-06	6.17784e-06	4.11856e-06	0.0326585
1318	1.83773e-06	1.15878e-06	7.72519e-07	0.00612577
1319	3.35374e-06	2.1147e-06	1.4098e-06	0.0111791
1320	3.2125e-06	2.02564e-06	1.35043e-06	0.0107083
1321	9.6433e-06	6.08057e-06	4.05372e-06	0.0321443
1322	3.48679e-06	2.19859e-06	1.46573e-06	0.0116226
1323	7.5099e-06	4.73536e-06	3.15691e-06	0.025033
1324	1.28103e-06	8.07755e-07	5.38503e-07	0.00427011
1325	3.69841e-06	2.33203e-06	1.55469e-06	0.012328
1326	4.30834e-06	2.71662e-06	1.81108e-06	0.0143611
1327	5.36988e-06	3.38597e-06	2.25732e-06	0.0178996
1328	3.96251e-06	2.49855e-06	1.6657e-06	0.0132084
1329	5.98986e-06	3.7769e-06	2.51793e-06	0.0199662
1330	7.41785e-06	4.67732e-06	3.11821e-06	0.0247262
1331	6.44428e-06	4.06344e-06	2.70896e-06	0.0214809
1332	3.42572e-06	2.16009e-06	1.44006e-06	0.0114191
1333	2.74309e-06	1.72965e-06	1.1531e-06	0.00914363
1334	5.75928e-06	3.63151e-06	2.42101e-06	0.0191976
1335	7.37633e-06	4.65114e-06	3.10076e-06	0.0245878
1336	8.79811e-06	5.54764e-06	3.69843e-06	0.029327
1337	1.13487e-05	7.15593e-06	4.77062e-06	0.0378291
1338	1.80625e-05	1.13893e-05	7.59287e-06	0.0602084
1339	3.03307e-06	1.9125e-06	1.275e-06	0.0101102
1340	9.55609e-06	6.02558e-06	4.01705e-06	0.0318536
1341	4.2785e-06	2.6978e-06	1.79854e-06	0.0142617
1342	3.10462e-06	1.95761e-06	1.30508e-06	0.0103487
1343	3.04926e-05	1.92271e-05	1.2818e-05	0.101642
1344	8.2361e-06	5.19326e-06	3.46218e-06	0.0274537
1345	6.19907e-06	3.90882e-06	2.60588e-06	0.0206636
1346	7.36951e-06	4.64684e-06	3.09789e-06	0.024565
1347	1.87197e-05	1.18037e-05	7.86913e-06	0.062399
1348	2.2463e-06	1.4164e-06	9.44269e-07	0.00748767
1349	1.20704e-06	7.61098e-07	5.07398e-07	0.00402347
1350	5.30628e-06	3.34587e-06	2.23058e-06	0.0176876
1351	1.45334e-05	9.16405e-06	6.10937e-06	0.0484448
1352	6.99866e-06	4.413e-06	2.942e-06	0.0233289
1353	1.04305e-05	6.57695e-06	4.38463e-06	0.0347684
1354	9.45412e-06	5.96128e-06	3.97419e-06	0.0315137
1355	4.4774e-06	2.82322e-06	1.88215e-06	0.0149247
1356	2.77449e-06	1.74945e-06	1.1663e-06	0.00924829
1357	2.07267e-06	1.30692e-06	8.7128e-07	0.0069089
1358	3.21592e-06	2.02779e-06	1.35186e-06	0.0107197
1359	2.74757e-05	1.73248e-05	1.15499e-05	0.0915857
1360	4.42719e-06	2.79156e-06	1.86104e-06	0.0147573
1361	5.39241e-06	3.40018e-06	2.26678e-06	0.0179747
1362	1.22519e-06	7.72542e-07	5.15028e-07	0.00408397
1363	2.08586e-05	1.31523e-05	8.76823e-06	0.0695285
1364	6.64521e-06	4.19013e-06	2.79342e-06	0.0221507
1365	4.80539e-06	3.03003e-06	2.02002e-06	0.016018
1366	5.68768e-06	3.58636e-06	2.39091e-06	0.0189589
1367	2.26338e-06	1.42717e-06	9.51448e-07	0.0075446
1368	3.32457e-06	2.09631e-06	1.39754e-06	0.0110819
1369	1.13808e-05	7.17617e-06	4.78411e-06	0.0379361
1370	1.25422e-05	7.90846e-06	5.27231e-06	0.0418073
1371	6.16579e-06	3.88783e-06	2.59189e-06	0.0205526
1372	2.04297e-06	1.28819e-06	8.58796e-07	0.00680991
1373	4.36088e-06	2.74975e-06	1.83317e-06	0.0145363
1374	5.10455e-06	3.21867e-06	2.14578e-06	0.0170152
1375	4.91502e-06	3.09916e-06	2.06611e-06	0.0163834
1376	1.51215e-05	9.53488e-06	6.35658e-06	0.0504051
1377	1.36112e-06	8.58251e-07	5.72167e-07	0.00453706
1378	1.76607e-05	1.11359e-05	7.42395e-06	0.058869
1379	5.38861e-06	3.39778e-06	2.26519e-06	0.017962
1380	6.19674e-06	3.90735e-06	2.6049e-06	0.0206558
1381	3.21849e-06	2.02942e-06	1.35294e-06	0.0107283
1382	3.7612e-06	2.37162e-06	1.58108e-06	0.0125373
1383	1.93689e-06	1.2213e-06	8.14203e-07	0.0064563
1384	3.38617e-06	2.13515e-06	1.42343e-06	0.0112872
1385	4.28371e-06	2.70109e-06	1.80072e-06	0.014279
1386	1.34406e-05	8.47494e-06	5.64996e-06	0.0448019
1387	6.44894e-06	4.06637e-06	2.71091e-06	0.0214965
1388	6.70542e-06	4.22809e-06	2.81873e-06	0.0223514
1389	3.85642e-06	2.43166e-06	1.62111e-06	0.0128547
1390	5.453e-06	3.43838e-06	2.29226e-06	0.0181767
1391	4.02304e-06	2.53672e-06	1.69115e-06	0.0134101
1392	6.60027e-06	4.16179e-06	2.77453e-06	0.0220009
1393	4.35544e-06	2.74632e-06	1.83088e-06	0.0145181
1394	5.74923e-06	3.62517e-06	2.41678e-06	0.0191641
1395	8.71964e-06	5.49816e-06	3.66544e-06	0.0290655
1396	9.29452e-06	5.86065e-06	3.9071e-06	0.0309817
1397	8.93271e-06	5.63251e-06	3.75501e-06	0.0297757
1398	2.86523e-06	1.80667e-06	1.20445e-06	0.00955077
1399	1.19936e-05	7.56256e-06	5.04171e-06	0.0399787
1400	5.36339e-06	3.38188e-06	2.25459e-06	0.017878
1401	6.71008e-06	4.23103e-06	2.82069e-06	0.0223669
1402	2.82299e-06	1.78004e-06	1.18669e-06	0.00940997
1403	9.3988e-06	5.9264e-06	3.95094e-06	0.0313293
1404	3.27318e-06	2.0639e-06	1.37593e-06	0.0109106
1405	3.87063e-06	2.44062e-06	1.62708e-06	0.0129021
1406	1.60258e-05	1.01051e-05	6.73672e-06	0.0534195
1407	1.34403e-05	8.47477e-06	5.64985e-06	0.044801
1408	2.68883e-06	1.69544e-06	1.13029e-06	0.00896277
1409	4.81117e-06	3.03368e-06	2.02245e-06	0.0160372
1410	1.0938e-05	6.89698e-06	4.59798e-06	0.0364602
1411	1.76078e-05	1.11026e-05	7.40174e-06	0.0586928
1412	1.12877e-05	7.11748e-06	4.74499e-06	0.0376258
1413	5.52454e-06	3.48349e-06	2.32233e-06	0.0184151
1414	6.42785e-06	4.05307e-06	2.70205e-06	0.0214262
1415	1.35468e-06	8.54191e-07	5.6946e-07	0.00451559
1416	7.94926e-06	5.0124e-06	3.3416e-06	0.0264975
1417	1.03192e-05	6.50676e-06	4.33784e-06	0.0343973
1418	4.03227e-06	2.54255e-06	1.69503e-06	0.0134409
1419	1.38277e-05	8.71907e-06	5.81271e-06	0.0460925
1420	3.12141e-06	1.9682e-06	1.31214e-06	0.0104047
1421	2.93268e-06	1.8492e-06	1.2328e-06	0.00977561
1422	1.0452e-05	6.59049e-06	4.39366e-06	0.03484
1423	4.58005e-06	2.88794e-06	1.9253e-06	0.0152668
1424	1.20603e-05	7.60462e-06	5.06975e-06	0.040201
1425	1.08833e-06	6.86243e-07	4.57496e-07	0.00362776
1426	8.69788e-06	5.48444e-06	3.65629e-06	0.0289929
1427	6.39191e-06	4.03042e-06	2.68694e-06	0.0213064
1428	1.1141e-06	7.02495e-07	4.6833e-07	0.00371367
1429	1.01747e-05	6.41563e-06	4.27709e-06	0.0339156
1430	2.86877e-06	1.8089e-06	1.20593e-06	0.00956256
1431	3.72597e-06	2.34941e-06	1.56627e-06	0.0124199
1432	5.46021e-06	3.44293e-06	2.29529e-06	0.0182007
1433	5.47053e-06	3.44944e-06	2.29962e-06	0.0182351
1434	4.0191e-06	2.53424e-06	1.68949e-06	0.013397
1435	8.55052e-06	5.39152e-06	3.59435e-06	0.0285017
1436	8.55601e-06	5.39498e-06	3.59666e-06	0.02852
1437	1.20051e-05	7.56979e-06	5.04653e-06	0.0400169
1438	1.25451e-05	7.91029e-06	5.27353e-06	0.0418169
1439	1.28464e-05	8.10026e-06	5.40017e-06	0.0428212
1440	4.29e-06	2.70505e-06	1.80337e-06	0.0143
1441	1.91589e-05	1.20806e-05	8.05376e-06	0.0638631
1442	6.02187e-06	3.79709e-06	2.53139e-06	0.0200729
1443	6.90691e-06	4.35514e-06	2.90343e-06	0.023023
1444	4.76875e-06	3.00693e-06	2.00462e-06	0.0158958
1445	3.09389e-06	1.95085e-06	1.30056e-06	0.010313
1446	8.69716e-07	5.48399e-07	3.65599e-07	0.00289905
1447	5.42666e-06	3.42177e-06	2.28118e-06	0.0180889
1448	4.80031e-06	3.02683e-06	2.01789e-06	0.016001
1449	5.63534e-06	3.55336e-06	2.36891e-06	0.0187845
1450	6.28939e-06	3.96577e-06	2.64384e-06	0.0209646
1451	5.47672e-06	3.45334e-06	2.30222e-06	0.0182557
1452	8.32357e-06	5.24842e-06	3.49895e-06	0.0277452
1453	5.57658e-06	3.51631e-06	2.3442e-06	0.0185886
1454	4.81778e-06	3.03785e-06	2.02523e-06	0.0160593
1455	4.13343e-06	2.60633e-06	1.73755e-06	0.0137781
1456	9.7627e-06	6.15586e-06	4.10391e-06	0.0325423
1457	5.80283e-06	3.65897e-06	2.43931e-06	0.0193428
1458	3.15234e-06	1.98771e-06	1.32514e-06	0.0105078
1459	5.61274e-06	3.53911e-06	2.35941e-06	0.0187091
1460	1.17655e-05	7.41874e-06	4.94583e-06	0.0392184
1461	6.01777e-06	3.7945e-06	2.52966e-06	0.0200592
1462	9.38888e-06	5.92015e-06	3.94676e-06	0.0312963
1463	4.54578e-06	2.86634e-06	1.91089e-06	0.0151526
1464	4.57468e-06	2.88456e-06	1.92304e-06	0.0152489
1465	3.62067e-06	2.28301e-06	1.52201e-06	0.0120689
1466	7.28756e-06	4.59516e-06	3.06344e-06	0.0242919
1467	8.92914e-06	5.63026e-06	3.75351e-06	0.0297638
1468	1.16859e-05	7.36851e-06	4.91234e-06	0.0389529
1469	2.86451e-05	1.80622e-05	1.20414e-05	0.0954838
1470	6.85348e-06	4.32145e-06	2.88097e-06	0.0228449
1471	3.69141e-06	2.32761e-06	1.55174e-06	0.0123047
1472	6.88455e-06	4.34104e-06	2.89403e-06	0.0229485
1473	5.33681e-06	3.36512e-06	2.24341e-06	0.0177894
1474	5.6331e-06	3.55195e-06	2.36797e-06	0.018777
1475	1.41535e-05	8.92447e-06	5.94964e-06	0.0471783
1476	8.05355e-06	5.07816e-06	3.38544e-06	0.0268452
1477	3.31356e-06	2.08936e-06	1.39291e-06	0.0110452
1478	4.63638e-06	2.92347e-06	1.94898e-06	0.0154546
1479	5.89827e-06	3.71915e-06	2.47943e-06	0.0196609
1480	9.57905e-06	6.04006e-06	4.02671e-06	0.0319302
1481	1.22228e-05	7.70708e-06	5.13805e-06	0.0407427
1482	3.50589e-06	2.21063e-06	1.47376e-06	0.0116863
1483	1.38072e-05	8.7061e-06	5.80406e-06	0.0460239
1484	5.55121e-06	3.50031e-06	2.33354e-06	0.018504
1485	4.35956e-06	2.74892e-06	1.83261e-06	0.0145319
1486	8.6186e-06	5.43445e-06	3.62297e-06	0.0287287
1487	6.04615e-06	3.81239e-06	2.54159e-06	0.0201538
1488	4.65695e-06	2.93643e-06	1.95762e-06	0.0155232
1489	1.67409e-06	1.0556e-06	7.03732e-07	0.00558031
1490	1.10355e-05	6.95842e-06	4.63895e-06	0.036785
1491	4.01647e-06	2.53258e-06	1.68839e-06	0.0133882
1492	1.37323e-05	8.65892e-06	5.77261e-06	0.0457745
1493	1.19355e-05	7.5259e-06	5.01727e-06	0.0397849
1494	3.29976e-06	2.08066e-06	1.38711e-06	0.0109992
1495	2.51139e-06	1.58356e-06	1.0557e-06	0.00837132
1496	9.46739e-06	5.96966e-06	3.97977e-06	0.031558
1497	1.66063e-05	1.04711e-05	6.9807e-06	0.0553542
1498	5.44868e-06	3.43566e-06	2.29044e-06	0.0181623
1499	7.9267e-06	4.99817e-06	3.33211e-06	0.0264223
1500	9.05552e-06	5.70995e-06	3.80663e-06	0.0301851
1501	2.39519e-06	1.51028e-06	1.00686e-06	0.00798396
1502	2.08364e-06	1.31384e-06	8.75891e-07	0.00694546
1503	5.34903e-06	3.37283e-06	2.24855e-06	0.0178301
1504	3.63203e-06	2.29017e-06	1.52678e-06	0.0121068
1505	9.07675e-06	5.72334e-06	3.81556e-06	0.0302558
1506	3.77512e-06	2.3804e-06	1.58693e-06	0.0125837
1507	1.48498e-05	9.36355e-06	6.24237e-06	0.0494995
1508	4.08884e-06	2.57821e-06	1.71881e-06	0.0136295
1509	4.01155e-06	2.52948e-06	1.68632e-06	0.0133718
1510	1.38252e-05	8.71746e-06	5.81164e-06	0.046084
1511	5.71494e-06	3.60355e-06	2.40237e-06	0.0190498
1512	2.45118e-06	1.54559e-06	1.03039e-06	0.00817058
1513	5.4594e-06	3.44242e-06	2.29495e-06	0.018198
1514	4.70051e-06	2.9639e-06	1.97593e-06	0.0156684
1515	9.32294e-06	5.87857e-06	3.91905e-06	0.0310765
1516	5.44813e-06	3.43531e-06	2.29021e-06	0.0181604
1517	4.91876e-06	3.10152e-06	2.06768e-06	0.0163959
1518	7.07187e-06	4.45916e-06	2.97278e-06	0.0235729
1519	8.40517e-06	5.29987e-06	3.53325e-06	0.0280172
1520	1.58266e-06	9.97944e-07	6.65296e-07	0.00527553
1521	4.72705e-06	2.98063e-06	1.98709e-06	0.0157568
1522	2.02237e-06	1.2752e-06	8.50135e-07	0.00674123
1523	4.37489e-06	2.75858e-06	1.83905e-06	0.014583
1524	2.07231e-06	1.30669e-06	8.71127e-07	0.00690769
1525	3.58097e-06	2.25798e-06	1.50532e-06	0.0119366
1526	1.09365e-05	6.89601e-06	4.59734e-06	0.0364551
1527	3.00203e-06	1.89293e-06	1.26195e-06	0.0100068
1528	1.28946e-05	8.13066e-06	5.42044e-06	0.0429819
1529	8.36517e-06	5.27465e-06	3.51643e-06	0.0278839
1530	3.30462e-06	2.08372e-06	1.38915e-06	0.0110154
1531	6.58316e-07	4.151e-07	2.76734e-07	0.00219439
1532	3.48919e-06	2.2001e-06	1.46674e-06	0.0116306
1533	5.13702e-06	3.23914e-06	2.15943e-06	0.0171234
1534	1.00318e-05	6.32556e-06	4.21704e-06	0.0334394
1535	1.04377e-05	6.58148e-06	4.38766e-06	0.0347923
1536	5.98677e-06	3.77495e-06	2.51664e-06	0.0199559
1537	2.88398e-06	1.81849e-06	1.21233e-06	0.00961328
1538	6.43886e-06	4.06002e-06	2.70668e-06	0.0214629
1539	1.5669e-06	9.8801e-07	6.58673e-07	0.00522302
1540	3.56377e-06	2.24713e-06	1.49809e-06	0.0118792
1541	3.69823e-06	2.33192e-06	1.55461e-06	0.0123274
1542	1.27856e-05	8.06198e-06	5.37465e-06	0.0426188
1543	1.06787e-05	6.73347e-06	4.48898e-06	0.0355958
1544	9.05412e-06	5.70907e-06	3.80604e-06	0.0301804
1545	3.47396e-06	2.1905e-06	1.46033e-06	0.0115799
1546	4.46332e-06	2.81435e-06	1.87623e-06	0.0148777
1547	1.3601e-05	8.57609e-06	5.71739e-06	0.0453366
1548	9.89657e-06	6.24027e-06	4.16018e-06	0.0329886
1549	8.18263e-06	5.15955e-06	3.4397e-06	0.0272754
1550	3.58285e-06	2.25916e-06	1.50611e-06	0.0119428
1551	4.01543e-06	2.53193e-06	1.68795e-06	0.0133848
1552	9.13996e-06	5.7632e-06	3.84213e-06	0.0304665
1553	6.50892e-06	4.10419e-06	2.73613e-06	0.0216964
1554	4.89216e-06	3.08475e-06	2.0565e-06	0.0163072
1555	1.09081e-05	6.87811e-06	4.58541e-06	0.0363604
1556	2.12023e-06	1.33691e-06	8.91272e-07	0.00706743
1557	1.05928e-05	6.67926e-06	4.45284e-06	0.0353092
1558	6.6088e-06	4.16717e-06	2.77811e-06	0.0220293
1559	5.36934e-06	3.38563e-06	2.25709e-06	0.0178978
1560	6.67525e-06	4.20907e-06	2.80605e-06	0.0222508
1561	2.78428e-06	1.75562e-06	1.17042e-06	0.00928093
1562	8.9024e-06	5.6134e-06	3.74227e-06	0.0296747
1563	9.57444e-06	6.03715e-06	4.02477e-06	0.0319148
1564	4.75525e-06	2.99842e-06	1.99895e-06	0.0158508
1565	5.77358e-06	3.64052e-06	2.42702e-06	0.0192453
1566	1.92796e-05	1.21567e-05	8.10447e-06	0.0642652
1567	2.94246e-05	1.85537e-05	1.23691e-05	0.0980821
1568	5.52078e-06	3.48112e-06	2.32075e-06	0.0184026
1569	2.9547e-06	1.86308e-06	1.24206e-06	0.009849
1570	9.90903e-06	6.24813e-06	4.16542e-06	0.0330301
1571	2.07346e-06	1.30742e-06	8.71611e-07	0.00691152
1572	1.23887e-05	7.81166e-06	5.20778e-06	0.0412956
1573	4.57658e-06	2.88576e-06	1.92384e-06	0.0152553
1574	1.32628e-05	8.36286e-06	5.57524e-06	0.0442094
1575	6.33026e-06	3.99154e-06	2.66103e-06	0.0211009
1576	1.40454e-05	8.85634e-06	5.90423e-06	0.0468181
1577	6.95603e-06	4.38612e-06	2.92408e-06	0.0231868
1578	1.40793e-05	8.87771e-06	5.91848e-06	0.0469311
1579	1.55132e-05	9.78185e-06	6.52123e-06	0.0517107
1580	1.08392e-05	6.83466e-06	4.55644e-06	0.0361308
1581	7.09343e-06	4.47276e-06	2.98184e-06	0.0236448
1582	3.80557e-06	2.3996e-06	1.59973e-06	0.0126852
1583	6.31841e-06	3.98407e-06	2.65605e-06	0.0210614
1584	1.15017e-05	7.2524e-06	4.83493e-06	0.0383391
1585	1.36373e-06	8.599e-07	5.73267e-07	0.00454577
1586	3.36513e-06	2.12188e-06	1.41459e-06	0.0112171
1587	4.26414e-06	2.68875e-06	1.7925e-06	0.0142138
1588	3.13597e-06	1.97738e-06	1.31825e-06	0.0104532
1589	4.88708e-06	3.08154e-06	2.05436e-06	0.0162903
1590	5.97973e-06	3.77051e-06	2.51368e-06	0.0199324
1591	8.69673e-06	5.48371e-06	3.65581e-06	0.0289891
1592	6.15189e-06	3.87907e-06	2.58605e-06	0.0205063
1593	5.47029e-06	3.44928e-06	2.29952e-06	0.0182343
1594	3.97823e-06	2.50847e-06	1.67231e-06	0.0132608
1595	1.23331e-05	7.77661e-06	5.1844e-06	0.0411102
1596	4.34029e-06	2.73677e-06	1.82451e-06	0.0144676
1597	4.64676e-06	2.93001e-06	1.95334e-06	0.0154892
1598	4.29015e-06	2.70515e-06	1.80343e-06	0.0143005
1599	4.78679e-06	3.01831e-06	2.0122e-06	0.015956
1600	1.31858e-06	8.31427e-07	5.54285e-07	0.00439525
1601	6.92862e-06	4.36884e-06	2.91256e-06	0.0230954
1602	5.7217e-06	3.60782e-06	2.40521e-06	0.0190723
1603	1.987e-06	1.2529e-06	8.35268e-07	0.00662334
1604	1.69773e-05	1.0705e-05	7.1367e-06	0.0565911
1605	7.09919e-06	4.47639e-06	2.98426e-06	0.023664
1606	9.64884e-06	6.08406e-06	4.05604e-06	0.0321628
1607	2.38268e-06	1.5024e-06	1.0016e-06	0.00794227
1608	1.08753e-05	6.85739e-06	4.5716e-06	0.0362509
1609	5.86532e-06	3.69837e-06	2.46558e-06	0.0195511
1610	4.86826e-06	3.06967e-06	2.04645e-06	0.0162275
1611	9.59609e-06	6.05081e-06	4.03387e-06	0.031987
1612	2.08055e-06	1.31189e-06	8.74594e-07	0.00693518
1613	9.13504e-06	5.76009e-06	3.84006e-06	0.0304501
1614	8.33805e-06	5.25755e-06	3.50503e-06	0.0277935
1615	3.33116e-06	2.10046e-06	1.40031e-06	0.0111039
1616	4.28933e-05	2.70463e-05	1.80309e-05	0.142978
1617	9.28655e-06	5.85563e-06	3.90375e-06	0.0309552
1618	6.83888e-06	4.31225e-06	2.87483e-06	0.0227963
1619	2.24356e-06	1.41467e-06	9.43115e-07	0.00747852
1620	1.06809e-06	6.73484e-07	4.48989e-07	0.0035603
1621	8.26189e-06	5.20953e-06	3.47302e-06	0.0275396
1622	1.00817e-05	6.35698e-06	4.23798e-06	0.0336055
1623	3.66396e-06	2.3103e-06	1.5402e-06	0.0122132
1624	6.37409e-06	4.01917e-06	2.67945e-06	0.021247
1625	6.24071e-06	3.93507e-06	2.62338e-06	0.0208024
1626	5.46959e-07	3.44884e-07	2.29923e-07	0.0018232
1627	6.6332e-06	4.18256e-06	2.78837e-06	0.0221107
1628	8.0788e-06	5.09408e-06	3.39605e-06	0.0269293
1629	5.51034e-06	3.47454e-06	2.31636e-06	0.0183678
1630	5.90588e-07	3.72395e-07	2.48263e-07	0.00196863
1631	1.76554e-06	1.11326e-06	7.42173e-07	0.00588513
1632	4.88049e-06	3.07739e-06	2.05159e-06	0.0162683
1633	5.14071e-06	3.24147e-06	2.16098e-06	0.0171357
1634	1.67144e-05	1.05392e-05	7.02615e-06	0.0557145
1635	2.59744e-05	1.63781e-05	1.09187e-05	0.0865813
1636	6.36575e-06	4.01392e-06	2.67594e-06	0.0212192
1637	3.82401e-06	2.41123e-06	1.60748e-06	0.0127467
1638	4.78063e-06	3.01442e-06	2.00961e-06	0.0159354
1639	5.60433e-06	3.53381e-06	2.35587e-06	0.0186811
1640	4.68887e-06	2.95656e-06	1.97104e-06	0.0156296
1641	5.40177e-06	3.40608e-06	2.27072e-06	0.0180059
1642	1.46508e-05	9.23804e-06	6.15869e-06	0.0488359
1643	4.56578e-06	2.87895e-06	1.9193e-06	0.0152193
1644	8.71448e-06	5.49491e-06	3.66327e-06	0.0290483
1645	4.00285e-06	2.524e-06	1.68266e-06	0.0133428
1646	8.14544e-06	5.1361e-06	3.42407e-06	0.0271515
1647	5.12679e-06	3.23269e-06	2.15513e-06	0.0170893
1648	5.69432e-06	3.59055e-06	2.3937e-06	0.0189811
1649	1.01489e-05	6.39935e-06	4.26623e-06	0.0338295
1650	5.29861e-06	3.34103e-06	2.22735e-06	0.017662
1651	5.60195e-06	3.5323e-06	2.35487e-06	0.0186732
1652	3.45654e-06	2.17952e-06	1.45301e-06	0.0115218
1653	5.37629e-06	3.39002e-06	2.26001e-06	0.017921
1654	4.43307e-06	2.79527e-06	1.86351e-06	0.0147769
1655	4.42584e-06	2.79071e-06	1.86047e-06	0.0147528
1656	4.3725e-06	2.75708e-06	1.83805e-06	0.014575
1657	6.2154e-06	3.91911e-06	2.61274e-06	0.020718
1658	4.04587e-06	2.55112e-06	1.70075e-06	0.0134862
1659	1.60821e-05	1.01406e-05	6.76039e-06	0.0536072
1660	6.50595e-06	4.10232e-06	2.73488e-06	0.0216865
1661	4.62895e-06	2.91878e-06	1.94585e-06	0.0154298
1662	3.97508e-06	2.50648e-06	1.67099e-06	0.0132503
1663	7.49454e-06	4.72568e-06	3.15045e-06	0.0249818
1664	5.24459e-06	3.30697e-06	2.20465e-06	0.017482
1665	3.95959e-06	2.49672e-06	1.66448e-06	0.0131986
1666	9.64025e-06	6.07865e-06	4.05243e-06	0.0321342
1667	9.12023e-06	5.75075e-06	3.83383e-06	0.0304008
1668	9.12088e-06	5.75116e-06	3.83411e-06	0.0304029
1669	6.41224e-06	4.04323e-06	2.69549e-06	0.0213741
1670	3.79407e-06	2.39235e-06	1.5949e-06	0.0126469
1671	1.47036e-06	9.27137e-07	6.18091e-07	0.00490122
1672	9.08484e-06	5.72844e-06	3.81896e-06	0.0302828
1673	1.98007e-06	1.24853e-06	8.32354e-07	0.00660023
1674	4.25613e-06	2.6837e-06	1.78913e-06	0.0141871
1675	5.57402e-06	3.51469e-06	2.34313e-06	0.0185801
1676	3.12108e-06	1.96799e-06	1.312e-06	0.0104036
1677	4.26167e-06	2.68719e-06	1.79146e-06	0.0142056
1678	2.17354e-06	1.37052e-06	9.13683e-07	0.00724514
1679	1.03884e-05	6.55043e-06	4.36695e-06	0.0346282
1680	1.94988e-06	1.22949e-06	8.19663e-07	0.0064996
1681	7.22719e-06	4.5571e-06	3.03806e-06	0.0240906
1682	6.68089e-06	4.21263e-06	2.80842e-06	0.0222696
1683	5.96983e-06	3.76427e-06	2.50951e-06	0.0198994
1684	3.45635e-06	2.1794e-06	1.45293e-06	0.0115212
1685	1.05942e-05	6.68015e-06	4.45343e-06	0.0353139
1686	4.28893e-06	2.70438e-06	1.80292e-06	0.0142964
1687	4.39687e-06	2.77244e-06	1.84829e-06	0.0146562
1688	3.98956e-06	2.51561e-06	1.67708e-06	0.0132985
1689	1.44146e-05	9.0891e-06	6.0594e-06	0.0480486
1690	4.76369e-06	3.00374e-06	2.00249e-06	0.015879
1691	5.60798e-06	3.53611e-06	2.3574e-06	0.0186933
1692	7.58263e-06	4.78122e-06	3.18748e-06	0.0252754
1693	8.06499e-07	5.08537e-07	3.39025e-07	0.00268833
1694	1.56318e-05	9.8566e-06	6.57107e-06	0.0521059
1695	6.72065e-06	4.2377e-06	2.82513e-06	0.0224022
1696	7.13374e-06	4.49817e-06	2.99878e-06	0.0237791
1697	7.00373e-07	4.4162e-07	2.94413e-07	0.00233458
1698	4.90268e-06	3.09138e-06	2.06092e-06	0.0163423
1699	2.83302e-05	1.78636e-05	1.1909e-05	0.0944339
1700	1.12078e-05	7.06707e-06	4.71138e-06	0.0373594
1701	3.93207e-06	2.47936e-06	1.65291e-06	0.0131069
1702	1.3455e-06	8.48404e-07	5.65602e-07	0.004485
1703	3.84143e-06	2.42221e-06	1.61481e-06	0.0128048
1704	5.03155e-06	3.17264e-06	2.11509e-06	0.0167718
1705	5.97441e-06	3.76716e-06	2.51144e-06	0.0199147
1706	4.79439e-06	3.0231e-06	2.0154e-06	0.0159813
1707	1.63362e-05	1.03008e-05	6.86718e-06	0.054454
1708	5.19746e-06	3.27725e-06	2.18484e-06	0.0173249
1709	1.07523e-05	6.77985e-06	4.5199e-06	0.035841
1710	7.77735e-06	4.904e-06	3.26933e-06	0.0259245
1711	1.2471e-05	7.86361e-06	5.2424e-06	0.0415702
1712	9.62807e-06	6.07097e-06	4.04731e-06	0.0320936
1713	6.6875e-06	4.2168e-06	2.8112e-06	0.0222917
1714	4.56721e-06	2.87985e-06	1.9199e-06	0.015224
1715	3.72843e-06	2.35096e-06	1.56731e-06	0.0124281
1716	2.12622e-06	1.34069e-06	8.9379e-07	0.0070874
1717	3.28537e-06	2.07159e-06	1.38106e-06	0.0109512
1718	4.77184e-06	3.00888e-06	2.00592e-06	0.0159061
1719	1.68692e-06	1.06369e-06	7.09125e-07	0.00562308
1720	4.28616e-06	2.70264e-06	1.80176e-06	0.0142872
1721	9.28744e-06	5.85619e-06	3.90412e-06	0.0309581
1722	3.54422e-06	2.23481e-06	1.48987e-06	0.0118141
1723	7.27126e-06	4.58488e-06	3.05659e-06	0.0242375
1724	1.43907e-06	9.07402e-07	6.04935e-07	0.00479689
1725	1.18032e-05	7.44249e-06	4.96166e-06	0.039344
1726	7.47978e-06	4.71637e-06	3.14425e-06	0.0249326
1727	7.11988e-06	4.48943e-06	2.99296e-06	0.0237329
1728	9.9461e-06	6.2715e-06	4.181e-06	0.0331537
1729	3.18667e-06	2.00935e-06	1.33957e-06	0.0106222
1730	8.85425e-06	5.58304e-06	3.72202e-06	0.0295142
1731	3.11607e-06	1.96483e-06	1.30989e-06	0.0103869
1732	3.75093e-06	2.36515e-06	1.57676e-06	0.0125031
1733	6.25001e-06	3.94094e-06	2.62729e-06	0.0208334
1734	6.75608e-06	4.26004e-06	2.84003e-06	0.0225203
1735	5.7647e-06	3.63493e-06	2.42328e-06	0.0192157
1736	7.02703e-06	4.43088e-06	2.95392e-06	0.0234234
1737	8.76514e-06	5.52685e-06	3.68457e-06	0.0292171
1738	3.77595e-06	2.38092e-06	1.58728e-06	0.0125865
1739	2.21516e-06	1.39677e-06	9.31178e-07	0.00738387
1740	2.38257e-06	1.50232e-06	1.00155e-06	0.00794189
1741	1.0119e-05	6.38052e-06	4.25368e-06	0.0337299
1742	1.77462e-06	1.11899e-06	7.45991e-07	0.0059154
1743	7.1585e-06	4.51379e-06	3.00919e-06	0.0238617
1744	5.64772e-06	3.56116e-06	2.37411e-06	0.0188257
1745	7.38385e-06	4.65588e-06	3.10392e-06	0.0246128
1746	3.10914e-06	1.96046e-06	1.30698e-06	0.0103638
1747	7.18996e-06	4.53362e-06	3.02241e-06	0.0239665
1748	7.79489e-06	4.91506e-06	3.27671e-06	0.025983
1749	7.31071e-06	4.60976e-06	3.07317e-06	0.024369
1750	7.33105e-06	4.62259e-06	3.08173e-06	0.0244368
1751	4.61527e-06	2.91015e-06	1.9401e-06	0.0153842
1752	3.59877e-06	2.2692e-06	1.5128e-06	0.0119959
1753	3.22378e-06	2.03275e-06	1.35517e-06	0.0107459
1754	7.7173e-06	4.86613e-06	3.24409e-06	0.0257243
1755	2.20641e-06	1.39125e-06	9.275e-07	0.0073547
1756	2.32353e-06	1.4651e-06	9.76731e-07	0.00774509
1757	9.15255e-06	5.77113e-06	3.84742e-06	0.0305085
1758	1.02815e-05	6.48299e-06	4.32199e-06	0.0342717
1759	1.18064e-05	7.44451e-06	4.96301e-06	0.0393546
1760	1.83538e-06	1.1573e-06	7.71533e-07	0.00611794
1761	6.13704e-06	3.8697e-06	2.5798e-06	0.0204568
1762	1.27241e-05	8.02316e-06	5.34877e-06	0.0424136
1763	5.94977e-06	3.75162e-06	2.50108e-06	0.0198326
1764	8.65023e-06	5.4544e-06	3.63626e-06	0.0288341
1765	5.27549e-06	3.32646e-06	2.21764e-06	0.017585
1766	7.8842e-06	4.97138e-06	3.31425e-06	0.0262807
1767	2.10152e-06	1.32511e-06	8.83406e-07	0.00700505
1768	8.28007e-06	5.22099e-06	3.48066e-06	0.0276002
1769	1.14717e-06	7.23347e-07	4.82231e-07	0.0038239
1770	2.14551e-06	1.35285e-06	9.01898e-07	0.00715169
1771	1.38361e-05	8.72436e-06	5.81624e-06	0.0461205
1772	1.92348e-06	1.21285e-06	8.08566e-07	0.00641161
1773	4.84031e-06	3.05205e-06	2.0347e-06	0.0161344
1774	2.33278e-06	1.47094e-06	9.80623e-07	0.00777595
1775	5.15641e-06	3.25137e-06	2.16758e-06	0.017188
1776	7.37934e-06	4.65303e-06	3.10202e-06	0.0245978
1777	7.00605e-06	4.41766e-06	2.9451e-06	0.0233535
1778	5.93517e-06	3.74242e-06	2.49494e-06	0.0197839
1779	9.11236e-06	5.74579e-06	3.83052e-06	0.0303745
1780	5.2599e-06	3.31663e-06	2.21108e-06	0.017533
1781	9.98008e-06	6.29293e-06	4.19529e-06	0.0332669
1782	2.29695e-06	1.44834e-06	9.65558e-07	0.00765648
1783	4.14456e-06	2.61335e-06	1.74223e-06	0.0138152
1784	1.76338e-06	1.1119e-06	7.41264e-07	0.00587793
1785	1.0964e-05	6.91331e-06	4.60887e-06	0.0365465
1786	3.31883e-06	2.09269e-06	1.39512e-06	0.0110628
1787	8.01937e-06	5.05661e-06	3.37107e-06	0.0267312
1788	6.79892e-06	4.28705e-06	2.85804e-06	0.0226631
1789	3.68883e-06	2.32599e-06	1.55066e-06	0.0122961
1790	1.6056e-05	1.01241e-05	6.74938e-06	0.0535198
1791	6.48979e-06	4.09213e-06	2.72809e-06	0.0216326
1792	6.0779e-06	3.83241e-06	2.55494e-06	0.0202597
1793	4.83574e-06	3.04917e-06	2.03278e-06	0.0161191
1794	1.04174e-05	6.56869e-06	4.37913e-06	0.0347247
1795	9.77122e-06	6.16123e-06	4.10749e-06	0.0325707
1796	4.70928e-06	2.96943e-06	1.97962e-06	0.0156976
1797	1.18074e-05	7.44515e-06	4.96343e-06	0.039358
1798	4.76215e-06	3.00277e-06	2.00185e-06	0.0158738
1799	4.65011e-06	2.93212e-06	1.95475e-06	0.0155004
1800	3.94999e-06	2.49066e-06	1.66044e-06	0.0131666
1801	2.97739e-05	1.87739e-05	1.25159e-05	0.0992462
1802	7.71024e-06	4.86168e-06	3.24112e-06	0.0257008
1803	1.3271e-05	8.36803e-06	5.57869e-06	0.0442367
1804	3.76059e-06	2.37123e-06	1.58082e-06	0.0125353
1805	4.56768e-06	2.88015e-06	1.9201e-06	0.0152256
1806	9.79988e-06	6.1793e-06	4.11954e-06	0.0326663
1807	5.37286e-06	3.38785e-06	2.25857e-06	0.0179095
1808	2.35749e-06	1.48651e-06	9.91007e-07	0.00785829
1809	1.4176e-06	8.93864e-07	5.95909e-07	0.00472532
1810	1.6669e-05	1.05106e-05	7.0071e-06	0.0555635
1811	2.18057e-06	1.37495e-06	9.16636e-07	0.00726856
1812	2.51885e-06	1.58826e-06	1.05884e-06	0.00839615
1813	1.22279e-05	7.71027e-06	5.14018e-06	0.0407596
1814	6.3498e-06	4.00386e-06	2.66924e-06	0.021166
1815	8.99766e-06	5.67347e-06	3.78231e-06	0.0299922
1816	1.07623e-05	6.78616e-06	4.52411e-06	0.0358743
1817	7.88031e-06	4.96892e-06	3.31261e-06	0.0262677
1818	3.47952e-06	2.19401e-06	1.46267e-06	0.0115984
1819	4.37185e-06	2.75667e-06	1.83778e-06	0.0145728
1820	4.94593e-06	3.11865e-06	2.0791e-06	0.0164864
1821	1.31361e-06	8.28293e-07	5.52195e-07	0.00437869
1822	4.32481e-06	2.72701e-06	1.818e-06	0.014416
1823	1.68721e-06	1.06387e-06	7.09247e-07	0.00562404
1824	6.61183e-06	4.16908e-06	2.77939e-06	0.0220394
1825	5.49696e-06	3.46611e-06	2.31074e-06	0.0183232
1826	4.4483e-06	2.80487e-06	1.86991e-06	0.0148277
1827	1.31794e-06	8.31027e-07	5.54018e-07	0.00439314
1828	1.58896e-05	1.00192e-05	6.67945e-06	0.0529654
1829	2.2942e-05	1.44661e-05	9.64405e-06	0.0764734
1830	4.10931e-06	2.59112e-06	1.72741e-06	0.0136977
1831	4.8683e-06	3.0697e-06	2.04647e-06	0.0162277
1832	2.22227e-06	1.40125e-06	9.34167e-07	0.00740757
1833	1.42041e-05	8.95637e-06	5.97091e-06	0.0473469
1834	7.04303e-06	4.44097e-06	2.96065e-06	0.0234768
1835	5.12352e-06	3.23063e-06	2.15375e-06	0.0170784
1836	1.21446e-06	7.65777e-07	5.10518e-07	0.0040482
1837	4.64786e-06	2.93071e-06	1.9538e-06	0.0154929
1838	5.11878e-06	3.22764e-06	2.15176e-06	0.0170626
1839	6.81432e-06	4.29676e-06	2.86451e-06	0.0227144
1840	1.66296e-06	1.04858e-06	6.99051e-07	0.00554319
1841	5.65573e-06	3.56622e-06	2.37748e-06	0.0188524
1842	1.4341e-05	9.04269e-06	6.02846e-06	0.0478032
1843	6.25392e-06	3.94341e-06	2.62894e-06	0.0208464
1844	5.97255e-06	3.76599e-06	2.51066e-06	0.0199085
1845	1.17521e-05	7.41026e-06	4.94017e-06	0.0391736
1846	1.02199e-05	6.44413e-06	4.29608e-06	0.0340662
1847	6.62507e-06	4.17743e-06	2.78495e-06	0.0220836
1848	3.00486e-06	1.89471e-06	1.26314e-06	0.0100162
1849	4.01397e-06	2.53101e-06	1.68734e-06	0.0133799
1850	3.07551e-06	1.93926e-06	1.29284e-06	0.0102517
1851	6.74789e-06	4.25488e-06	2.83658e-06	0.022493
1852	2.56539e-06	1.6176e-06	1.0784e-06	0.0085513
1853	1.53209e-06	9.6606e-07	6.4404e-07	0.00510698
1854	5.52562e-06	3.48417e-06	2.32278e-06	0.0184187
1855	6.83684e-06	4.31096e-06	2.87397e-06	0.0227895
1856	1.04661e-05	6.59939e-06	4.39959e-06	0.034887
1857	1.60116e-05	1.00961e-05	6.73072e-06	0.0533719
1858	4.89199e-06	3.08464e-06	2.05643e-06	0.0163066
1859	3.97217e-06	2.50465e-06	1.66976e-06	0.0132406
1860	3.96924e-06	2.5028e-06	1.66853e-06	0.0132308
1861	9.16445e-06	5.77864e-06	3.85242e-06	0.0305482
1862	1.72114e-06	1.08526e-06	7.23508e-07	0.00573713
1863	4.8861e-06	3.08092e-06	2.05395e-06	0.016287
1864	4.10931e-06	2.59112e-06	1.72742e-06	0.0136977
1865	2.9302e-06	1.84763e-06	1.23175e-06	0.00976732
1866	1.61234e-06	1.01666e-06	6.77771e-07	0.00537445
1867	6.81693e-06	4.29841e-06	2.86561e-06	0.0227231
1868	1.32482e-05	8.35364e-06	5.56909e-06	0.0441607
1869	1.70304e-05	1.07385e-05	7.15899e-06	0.0567679
1870	1.07387e-05	6.77125e-06	4.51417e-06	0.0357955
1871	1.54203e-05	9.72326e-06	6.48217e-06	0.051401
1872	6.81584e-06	4.29772e-06	2.86515e-06	0.0227195
1873	3.22018e-06	2.03048e-06	1.35365e-06	0.0107339
1874	3.24348e-06	2.04517e-06	1.36345e-06	0.0108116
1875	4.30121e-06	2.71212e-06	1.80808e-06	0.0143374
1876	3.09036e-06	1.94862e-06	1.29908e-06	0.0103012
1877	5.94119e-06	3.74621e-06	2.49747e-06	0.019804
1878	4.81725e-06	3.03751e-06	2.02501e-06	0.0160575
1879	3.6797e-06	2.32023e-06	1.54682e-06	0.0122657
1880	6.32827e-06	3.99029e-06	2.66019e-06	0.0210942
1881	7.53726e-06	4.75261e-06	3.16841e-06	0.0251242
1882	5.30018e-06	3.34202e-06	2.22802e-06	0.0176673
1883	1.27867e-05	8.06264e-06	5.37509e-06	0.0426223
1884	1.75631e-06	1.10744e-06	7.38293e-07	0.00585436
1885	2.49945e-06	1.57603e-06	1.05068e-06	0.00833151
1886	4.34668e-06	2.74079e-06	1.8272e-06	0.0144889
1887	7.55595e-06	4.7644e-06	3.17626e-06	0.0251865
1888	2.05172e-05	1.29371e-05	8.62472e-06	0.0683906
1889	6.47167e-06	4.0807e-06	2.72047e-06	0.0215722
1890	2.96364e-06	1.86872e-06	1.24581e-06	0.00987879
1891	6.93813e-06	4.37483e-06	2.91656e-06	0.0231271
1892	1.73723e-05	1.09541e-05	7.30274e-06	0.0579078
1893	5.13168e-06	3.23577e-06	2.15718e-06	0.0171056
1894	6.32115e-06	3.9858e-06	2.6572e-06	0.0210705
1895	7.40361e-06	4.66834e-06	3.11223e-06	0.0246787
1896	6.0623e-06	3.82258e-06	2.54839e-06	0.0202077
1897	5.05006e-06	3.18431e-06	2.12288e-06	0.0168335
1898	6.6834e-06	4.21421e-06	2.80947e-06	0.022278
1899	5.30152e-06	3.34287e-06	2.22858e-06	0.0176717
1900	5.19895e-06	3.27819e-06	2.18546e-06	0.0173298
1901	1.10181e-05	6.94747e-06	4.63165e-06	0.0367271
1902	2.08808e-06	1.31663e-06	8.77756e-07	0.00696025
1903	5.19255e-06	3.27416e-06	2.18277e-06	0.0173085
1904	7.22749e-06	4.55728e-06	3.03819e-06	0.0240916
1905	1.00022e-05	6.30689e-06	4.20459e-06	0.0333407
1906	3.93168e-06	2.47912e-06	1.65274e-06	0.0131056
1907	8.4064e-07	5.30065e-07	3.53376e-07	0.00280213
1908	1.31207e-06	8.27324e-07	5.51549e-07	0.00437356
1909	4.7485e-06	2.99416e-06	1.99611e-06	0.0158283
1910	5.24212e-06	3.30541e-06	2.20361e-06	0.0174737
1911	3.86993e-06	2.44018e-06	1.62679e-06	0.0128998
1912	6.69532e-06	4.22172e-06	2.81448e-06	0.0223177
1913	8.0734e-06	5.09067e-06	3.39378e-06	0.0269113
1914	1.44982e-05	9.1418e-06	6.09453e-06	0.0483272
1915	6.60329e-06	4.1637e-06	2.7758e-06	0.022011
1916	4.70978e-06	2.96975e-06	1.97983e-06	0.0156993
1917	5.71803e-06	3.6055e-06	2.40367e-06	0.0190601
1918	1.14049e-05	7.19135e-06	4.79423e-06	0.0380163
1919	6.3078e-06	3.97738e-06	2.65159e-06	0.021026
1920	5.65874e-06	3.56811e-06	2.37874e-06	0.0188625
1921	3.29773e-06	2.07938e-06	1.38625e-06	0.0109924
1922	6.35548e-06	4.00744e-06	2.67163e-06	0.0211849
1923	5.45843e-06	3.44181e-06	2.29454e-06	0.0181948
1924	4.14625e-05	2.61441e-05	1.74294e-05	0.138208
1925	1.13546e-05	7.15962e-06	4.77308e-06	0.0378486
1926	4.09365e-06	2.58125e-06	1.72083e-06	0.0136455
1927	2.28724e-06	1.44221e-06	9.61476e-07	0.00762412
1928	5.80909e-06	3.66291e-06	2.44194e-06	0.0193636
1929	4.68958e-06	2.95701e-06	1.97134e-06	0.0156319
1930	1.09821e-05	6.92472e-06	4.61648e-06	0.0366068
1931	2.73265e-06	1.72307e-06	1.14871e-06	0.00910882
1932	6.24958e-06	3.94067e-06	2.62711e-06	0.0208319
1933	6.38672e-06	4.02714e-06	2.68476e-06	0.0212891
1934	7.9094e-06	4.98727e-06	3.32484e-06	0.0263647
1935	8.01485e-06	5.05375e-06	3.36917e-06	0.0267162
1936	3.13912e-06	1.97937e-06	1.31958e-06	0.0104637
1937	7.82431e-06	4.93361e-06	3.28908e-06	0.026081
1938	4.23524e-06	2.67053e-06	1.78035e-06	0.0141175
1939	3.66273e-06	2.30953e-06	1.53969e-06	0.0122091
1940	6.51973e-06	4.11101e-06	2.74067e-06	0.0217324
1941	1.29069e-05	8.13842e-06	5.42561e-06	0.0430229
1942	2.26444e-05	1.42784e-05	9.51893e-06	0.0754812
1943	9.42619e-06	5.94367e-06	3.96245e-06	0.0314206
1944	5.75995e-06	3.63193e-06	2.42129e-06	0.0191998
1945	7.91794e-06	4.99265e-06	3.32843e-06	0.0263931
1946	2.78185e-06	1.75409e-06	1.16939e-06	0.00927283
1947	8.17285e-06	5.15338e-06	3.43559e-06	0.0272428
1948	5.60412e-06	3.53367e-06	2.35578e-06	0.0186804
1949	4.72274e-06	2.97792e-06	1.98528e-06	0.0157425
1950	4.60294e-06	2.90238e-06	1.93492e-06	0.0153431
1951	1.23128e-05	7.76379e-06	5.17586e-06	0.0410425
1952	1.2992e-05	8.19208e-06	5.46139e-06	0.0433066
1953	3.69814e-06	2.33186e-06	1.55457e-06	0.0123271
1954	6.67388e-06	4.20821e-06	2.80547e-06	0.0222463
1955	5.79209e-06	3.6522e-06	2.4348e-06	0.019307
1956	3.95031e-06	2.49087e-06	1.66058e-06	0.0131677
1957	8.92671e-06	5.62873e-06	3.75248e-06	0.0297557
1958	1.00106e-05	6.3122e-06	4.20813e-06	0.0333688
1959	9.81351e-06	6.1879e-06	4.12527e-06	0.0327117
1960	4.35016e-06	2.74299e-06	1.82866e-06	0.0145005
1961	6.62489e-06	4.17732e-06	2.78488e-06	0.022083
1962	3.21466e-06	2.027e-06	1.35134e-06	0.0107155
1963	1.4933e-05	9.41596e-06	6.27731e-06	0.0497765
1964	2.95979e-06	1.8663e-06	1.2442e-06	0.00986598
1965	1.85478e-05	1.16953e-05	7.79688e-06	0.0618261
1966	7.66075e-06	4.83048e-06	3.22032e-06	0.0255358
1967	4.73593e-06	2.98624e-06	1.99082e-06	0.0157864
1968	2.79071e-06	1.75968e-06	1.17312e-06	0.00930238
1969	5.04175e-06	3.17907e-06	2.11938e-06	0.0168058
1970	3.10661e-06	1.95887e-06	1.30591e-06	0.0103554
1971	7.18097e-06	4.52796e-06	3.01864e-06	0.0239366
1972	1.62196e-05	1.02273e-05	6.81817e-06	0.0540654
1973	6.06382e-06	3.82354e-06	2.54902e-06	0.0202127
1974	1.94488e-06	1.22634e-06	8.1756e-07	0.00648292
1975	3.61331e-06	2.27837e-06	1.51891e-06	0.0120444
1976	1.7591e-06	1.1092e-06	7.39465e-07	0.00586366
1977	5.77166e-06	3.63931e-06	2.42621e-06	0.0192389
1978	1.68517e-06	1.06258e-06	7.08388e-07	0.00561723
1979	1.09053e-05	6.87631e-06	4.58421e-06	0.0363509
1980	1.72704e-06	1.08898e-06	7.25988e-07	0.00575679
1981	7.02597e-06	4.43022e-06	2.95348e-06	0.0234199
1982	4.3623e-06	2.75064e-06	1.83376e-06	0.014541
1983	9.67111e-06	6.09811e-06	4.06541e-06	0.032237
1984	1.76738e-05	1.11442e-05	7.42946e-06	0.0589127
1985	1.15679e-05	7.29415e-06	4.86276e-06	0.0385598
1986	1.85309e-05	1.16846e-05	7.78974e-06	0.0617695
1987	2.42892e-06	1.53156e-06	1.02104e-06	0.00809641
1988	4.42934e-06	2.79291e-06	1.86194e-06	0.0147645
1989	2.15892e-05	1.36131e-05	9.07539e-06	0.0719642
1990	2.2028e-06	1.38897e-06	9.25981e-07	0.00734266
1991	2.36746e-05	1.4928e-05	9.95201e-06	0.0789155
1992	4.08608e-06	2.57647e-06	1.71765e-06	0.0136203
1993	5.3221e-06	3.35584e-06	2.23723e-06	0.0177403
1994	1.627e-05	1.0259e-05	6.83934e-06	0.0542332
1995	1.72196e-06	1.08578e-06	7.23853e-07	0.00573986
1996	1.83347e-06	1.15609e-06	7.7073e-07	0.00611158
1997	4.55687e-06	2.87333e-06	1.91555e-06	0.0151896
1998	2.4845e-06	1.5666e-06	1.0444e-06	0.00828167
1999	4.09486e-06	2.58201e-06	1.72134e-06	0.0136495
[truncated: 8,001 more rows]
