# Supplementary material for: Health risk assessment from habitants of Araró, Michoacán, México, exposed to arsenic by dust, using Monte Carlo probabilistic method
Source: PeerJ. 2025 Jun 10;13:e18805. doi: 10.7717/peerj.18805 (PMC12164815; doi:10.7717/peerj.18805)
Supplement: Supplemental Information 2 [file peerj-13-18805-s002.xlsx]

## Sheet: Risk Premises
Study Title:	Inhalación premisas simulación.					Last simulation run:
Study File:	Inhalación premisas simulación.xlsx					2022-11-07 11:52:56
	Output Cells	Histogram settings				Multi-cell output range names
Description for Reports	Range Names	Min value	Max value	Step size		title row or column (optional)
	ADD	Auto	Auto	Auto
	ADD_carc	Auto	Auto	Auto
	CR	Auto	Auto	Auto
	HQ	Auto	Auto	Auto
		Study	Min				Max
	Input Cells	File	Allowed		Expected		Allowed
Description for Reports	Range Names	Values	Values	10/90	Values	90/10	Values	Distributions	Parameters and chart settings
	BW	33.81	8.9	20.3513	34.1459	47.9418	96.65	Normal	Mean	33.81	std dev	10.9688	X Axis Min	auto	X Axis Max	auto
	Conc	15.6	5.94	10.1171	15.7996	21.5085	42.53	Normal	Mean	15.6	std dev	4.57375	X Axis Min	auto	X Axis Max	auto
	ED	8.82	6	7.85888	8.82022	9.78155	12	Normal	Mean	8.82	std dev	0.75	X Axis Min	auto	X Axis Max	auto

## Sheet: Simulation Summary
	10000	Simulations run
					Change in expected values as simulations increase									Change in standard deviation as simulations increase
	Minimum result	Maximum result	Expected value	Std deviation	125	250	500	1000	2000	4000	8000	10000		125	250	500	1000	2000	4000	8000	10000
ADD	9.35276e-10	2.55692e-08	4.63061e-09	2.39248e-09	-	0.00558655	0.00820783	0.0368981	0.0178098	0.00611839	-0.00341077	0.00510298		-	-0.024504	-0.0128389	0.086974	0.0400131	-0.0145257	0.00866292	0.00494829
ADD_carc	1.13002e-10	3.08932e-09	5.59479e-10	2.89064e-10	-	0.00558655	0.00820783	0.0368981	0.0178098	0.00611839	-0.00341077	0.00510298		-	-0.024504	-0.0128389	0.086974	0.0400131	-0.0145257	0.00866292	0.00494829
CR	9.41682e-12	2.57443e-10	4.66233e-11	2.40887e-11	-	0.00558655	0.00820783	0.0368981	0.0178098	0.00611839	-0.00341077	0.00510298		-	-0.024504	-0.0128389	0.086974	0.0400131	-0.0145257	0.00866292	0.00494829
HQ	6.23517e-05	0.00170461	0.000308707	0.000159499	-	0.00558655	0.00820783	0.0368981	0.0178098	0.00611839	-0.00341077	0.00510298		-	-0.024504	-0.0128389	0.086974	0.0400131	-0.0145257	0.00866292	0.00494829

## Sheet: Simulation variance
This worksheet shows the convergence of the output variables as a function of the number of simulations
You should run enough simulations until the % change is very small, typically < 1.0%
ADD
	# of Sims	125	250	500	1000	2000	4000	8000	10000
	Avg Value	4.29428e-09	4.31827e-09	4.35371e-09	4.51435e-09	4.59475e-09	4.62287e-09	4.6071e-09	4.63061e-09
	% Chg		0.00558655	0.00820783	0.0368981	0.0178098	0.00611839	-0.00341077	0.00510298
	Std Dev.	2.2001e-09	2.14619e-09	2.11863e-09	2.3029e-09	2.39505e-09	2.36026e-09	2.3807e-09	2.39248e-09
	% Chg		-0.024504	-0.0128389	0.086974	0.0400131	-0.0145257	0.00866292	0.00494829
ADD_carc
	# of Sims	125	250	500	1000	2000	4000	8000	10000
	Avg Value	5.18843e-10	5.21741e-10	5.26024e-10	5.45433e-10	5.55147e-10	5.58544e-10	5.56639e-10	5.59479e-10
	% Chg		0.00558655	0.00820783	0.0368981	0.0178098	0.00611839	-0.00341077	0.00510298
	Std Dev.	2.6582e-10	2.59307e-10	2.55977e-10	2.78241e-10	2.89374e-10	2.85171e-10	2.87641e-10	2.89064e-10
	% Chg		-0.024504	-0.0128389	0.086974	0.0400131	-0.0145257	0.00866292	0.00494829
CR
	# of Sims	125	250	500	1000	2000	4000	8000	10000
	Avg Value	4.32369e-11	4.34784e-11	4.38353e-11	4.54527e-11	4.62623e-11	4.65453e-11	4.63865e-11	4.66233e-11
	% Chg		0.00558655	0.00820783	0.0368981	0.0178098	0.00611839	-0.00341077	0.00510298
	Std Dev.	2.21517e-11	2.16089e-11	2.13314e-11	2.31867e-11	2.41145e-11	2.37642e-11	2.39701e-11	2.40887e-11
	% Chg		-0.024504	-0.0128389	0.086974	0.0400131	-0.0145257	0.00866292	0.00494829
HQ
	# of Sims	125	250	500	1000	2000	4000	8000	10000
	Avg Value	0.000286285	0.000287884	0.000290247	0.000300957	0.000306317	0.000308191	0.00030714	0.000308707
	% Chg		0.00558655	0.00820783	0.0368981	0.0178098	0.00611839	-0.00341077	0.00510298
	Std Dev.	0.000146673	0.000143079	0.000141242	0.000153527	0.00015967	0.00015735	0.000158714	0.000159499
	% Chg		-0.024504	-0.0128389	0.086974	0.0400131	-0.0145257	0.00866292	0.00494829

## Sheet: ADD Results
ADD Results
Minimum result	9.35276e-10				4.07119e-09	Study value
Maximum result	2.55692e-08				0.4948	of results are equal or lower
Expected value	4.63061e-09				0.5052	of results are equal or greater
Std Deviation	2.39248e-09
Out of 10000 simulations		Of those with numeric values:
10000 had numeric values.			5% <=	1.98134e-09
0 had error values.			10% <=	2.32991e-09
			15% <=	2.60074e-09
			20% <=	2.85249e-09
			25% <=	3.08048e-09
			30% <=	3.29064e-09
			35% <=	3.48603e-09
			40% <=	3.68374e-09
			45% <=	3.88779e-09
			50% <=	4.09714e-09
			55% <=	4.32676e-09
			60% <=	4.56263e-09
			65% <=	4.85337e-09
			70% <=	5.16107e-09
			75% <=	5.52967e-09
			80% <=	5.98346e-09
			85% <=	6.58738e-09
			90% <=	7.47056e-09
			95% <=	9.08141e-09
			100% <=	2.55692e-08
If ADD is:				4.07119e-09	0.4948	of results are equal or lower
(Chg to do what ifs)					0.5052	of results are greater
					Cumulative				Cumulative
ADD	frequency:				frequency:				frequency:
<=9.35276E-10	1	0.0001		<=9.35276E-10	1	0.0001		=>9.35276E-10	10000	1
9.35276E-10 to 2.2318E-09	842	0.0842		<=2.2318E-09	843	0.0843		=>2.2318E-09	9157	0.9157
2.2318E-09 to 3.52832E-09	2756	0.2756		<=3.52832E-09	3599	0.3599		=>3.52832E-09	6401	0.6401
3.52832E-09 to 4.82484E-09	2853	0.2853		<=4.82484E-09	6452	0.6452		=>4.82484E-09	3548	0.3548
4.82484E-09 to 6.12136E-09	1668	0.1668		<=6.12136E-09	8120	0.812		=>6.12136E-09	1880	0.188
6.12136E-09 to 7.41789E-09	856	0.0856		<=7.41789E-09	8976	0.8976		=>7.41789E-09	1024	0.1024
7.41789E-09 to 8.71441E-09	433	0.0433		<=8.71441E-09	9409	0.9409		=>8.71441E-09	591	0.0591
8.71441E-09 to 1.00109E-08	263	0.0263		<=1.00109E-08	9672	0.9672		=>1.00109E-08	328	0.0328
1.00109E-08 to 1.13075E-08	107	0.0107		<=1.13075E-08	9779	0.9779		=>1.13075E-08	221	0.0221
1.13075E-08 to 1.2604E-08	91	0.0091		<=1.2604E-08	9870	0.987		=>1.2604E-08	130	0.013
1.2604E-08 to 1.39005E-08	48	0.0048		<=1.39005E-08	9918	0.9918		=>1.39005E-08	82	0.0082
1.39005E-08 to 1.5197E-08	22	0.0022		<=1.5197E-08	9940	0.994		=>1.5197E-08	60	0.006
1.5197E-08 to 1.64935E-08	22	0.0022		<=1.64935E-08	9962	0.9962		=>1.64935E-08	38	0.0038
1.64935E-08 to 1.77901E-08	9	0.0009		<=1.77901E-08	9971	0.9971		=>1.77901E-08	29	0.0029
1.77901E-08 to 1.90866E-08	11	0.0011		<=1.90866E-08	9982	0.9982		=>1.90866E-08	18	0.0018
1.90866E-08 to 2.03831E-08	8	0.0008		<=2.03831E-08	9990	0.999		=>2.03831E-08	10	0.001
2.03831E-08 to 2.16796E-08	4	0.0004		<=2.16796E-08	9994	0.9994		=>2.16796E-08	6	0.0006
2.16796E-08 to 2.29762E-08	2	0.0002		<=2.29762E-08	9996	0.9996		=>2.29762E-08	4	0.0004
2.29762E-08 to 2.42727E-08	2	0.0002		<=2.42727E-08	9998	0.9998		=>2.42727E-08	2	0.0002
2.42727E-08 to 2.55692E-08	2	0.0002		<=2.55692E-08	10000	1		=>2.55692E-08	1	0.0001
>2.55692E-08	0	0
Bin Size	1.29652e-09
Number of bins	21
# of Sims	Avg Value	% Chg		Std Dev.	% Chg
125	4.29428e-09			2.2001e-09
250	4.31827e-09	0.00558655		2.14619e-09	-0.024504
500	4.35371e-09	0.00820783		2.11863e-09	-0.0128389
1000	4.51435e-09	0.0368981		2.3029e-09	0.086974
2000	4.59475e-09	0.0178098		2.39505e-09	0.0400131
4000	4.62287e-09	0.00611839		2.36026e-09	-0.0145257
8000	4.6071e-09	-0.00341077		2.3807e-09	0.00866292
10000	4.63061e-09	0.00510298		2.39248e-09	0.00494829

## Sheet: ADD_carc Results
ADD carc Results
Minimum result	1.13002e-10				4.91889e-10	Study value
Maximum result	3.08932e-09				0.4948	of results are equal or lower
Expected value	5.59479e-10				0.5052	of results are equal or greater
Std Deviation	2.89064e-10
Out of 10000 simulations		Of those with numeric values:
10000 had numeric values.			5% <=	2.39389e-10
0 had error values.			10% <=	2.81504e-10
			15% <=	3.14227e-10
			20% <=	3.44643e-10
			25% <=	3.7219e-10
			30% <=	3.97581e-10
			35% <=	4.21188e-10
			40% <=	4.45076e-10
			45% <=	4.6973e-10
			50% <=	4.95024e-10
			55% <=	5.22768e-10
			60% <=	5.51265e-10
			65% <=	5.86394e-10
			70% <=	6.23571e-10
			75% <=	6.68105e-10
			80% <=	7.22933e-10
			85% <=	7.959e-10
			90% <=	9.02607e-10
			95% <=	1.09723e-09
			100% <=	3.08932e-09
If ADD carc is:				4.91889e-10	0.4948	of results are equal or lower
(Chg to do what ifs)					0.5052	of results are greater
					Cumulative				Cumulative
ADD carc	frequency:				frequency:				frequency:
<=1.13002E-10	1	0.0001		<=1.13002E-10	1	0.0001		=>1.13002E-10	10000	1
1.13002E-10 to 2.6965E-10	842	0.0842		<=2.6965E-10	843	0.0843		=>2.6965E-10	9157	0.9157
2.6965E-10 to 4.26298E-10	2756	0.2756		<=4.26298E-10	3599	0.3599		=>4.26298E-10	6401	0.6401
4.26298E-10 to 5.82947E-10	2853	0.2853		<=5.82947E-10	6452	0.6452		=>5.82947E-10	3548	0.3548
5.82947E-10 to 7.39595E-10	1668	0.1668		<=7.39595E-10	8120	0.812		=>7.39595E-10	1880	0.188
7.39595E-10 to 8.96243E-10	856	0.0856		<=8.96243E-10	8976	0.8976		=>8.96243E-10	1024	0.1024
8.96243E-10 to 1.05289E-09	433	0.0433		<=1.05289E-09	9409	0.9409		=>1.05289E-09	591	0.0591
1.05289E-09 to 1.20954E-09	263	0.0263		<=1.20954E-09	9672	0.9672		=>1.20954E-09	328	0.0328
1.20954E-09 to 1.36619E-09	107	0.0107		<=1.36619E-09	9779	0.9779		=>1.36619E-09	221	0.0221
1.36619E-09 to 1.52284E-09	91	0.0091		<=1.52284E-09	9870	0.987		=>1.52284E-09	130	0.013
1.52284E-09 to 1.67948E-09	48	0.0048		<=1.67948E-09	9918	0.9918		=>1.67948E-09	82	0.0082
1.67948E-09 to 1.83613E-09	22	0.0022		<=1.83613E-09	9940	0.994		=>1.83613E-09	60	0.006
1.83613E-09 to 1.99278E-09	22	0.0022		<=1.99278E-09	9962	0.9962		=>1.99278E-09	38	0.0038
1.99278E-09 to 2.14943E-09	9	0.0009		<=2.14943E-09	9971	0.9971		=>2.14943E-09	29	0.0029
2.14943E-09 to 2.30608E-09	11	0.0011		<=2.30608E-09	9982	0.9982		=>2.30608E-09	18	0.0018
2.30608E-09 to 2.46273E-09	8	0.0008		<=2.46273E-09	9990	0.999		=>2.46273E-09	10	0.001
2.46273E-09 to 2.61937E-09	4	0.0004		<=2.61937E-09	9994	0.9994		=>2.61937E-09	6	0.0006
2.61937E-09 to 2.77602E-09	2	0.0002		<=2.77602E-09	9996	0.9996		=>2.77602E-09	4	0.0004
2.77602E-09 to 2.93267E-09	2	0.0002		<=2.93267E-09	9998	0.9998		=>2.93267E-09	2	0.0002
2.93267E-09 to 3.08932E-09	2	0.0002		<=3.08932E-09	10000	1		=>3.08932E-09	1	0.0001
>3.08932E-09	0	0
Bin Size	1.56648e-10
Number of bins	21
# of Sims	Avg Value	% Chg		Std Dev.	% Chg
125	5.18843e-10			2.6582e-10
250	5.21741e-10	0.00558655		2.59307e-10	-0.024504
500	5.26024e-10	0.00820783		2.55977e-10	-0.0128389
1000	5.45433e-10	0.0368981		2.78241e-10	0.086974
2000	5.55147e-10	0.0178098		2.89374e-10	0.0400131
4000	5.58544e-10	0.00611839		2.85171e-10	-0.0145257
8000	5.56639e-10	-0.00341077		2.87641e-10	0.00866292
10000	5.59479e-10	0.00510298		2.89064e-10	0.00494829

## Sheet: CR Results
CR Results
Minimum result	9.41682e-12				4.09908e-11	Study value
Maximum result	2.57443e-10				0.4948	of results are equal or lower
Expected value	4.66233e-11				0.5052	of results are equal or greater
Std Deviation	2.40887e-11
Out of 10000 simulations		Of those with numeric values:
10000 had numeric values.			5% <=	1.99491e-11
0 had error values.			10% <=	2.34586e-11
			15% <=	2.61855e-11
			20% <=	2.87203e-11
			25% <=	3.10158e-11
			30% <=	3.31318e-11
			35% <=	3.5099e-11
			40% <=	3.70897e-11
			45% <=	3.91442e-11
			50% <=	4.1252e-11
			55% <=	4.3564e-11
			60% <=	4.59388e-11
			65% <=	4.88662e-11
			70% <=	5.19642e-11
			75% <=	5.56754e-11
			80% <=	6.02444e-11
			85% <=	6.6325e-11
			90% <=	7.52172e-11
			95% <=	9.14361e-11
			100% <=	2.57443e-10
If CR is:				4.09908e-11	0.4948	of results are equal or lower
(Chg to do what ifs)					0.5052	of results are greater
					Cumulative				Cumulative
CR	frequency:				frequency:				frequency:
<=9.41682E-12	1	0.0001		<=9.41682E-12	1	0.0001		=>9.41682E-12	10000	1
9.41682E-12 to 2.24708E-11	842	0.0842		<=2.24708E-11	843	0.0843		=>2.24708E-11	9157	0.9157
2.24708E-11 to 3.55249E-11	2756	0.2756		<=3.55249E-11	3599	0.3599		=>3.55249E-11	6401	0.6401
3.55249E-11 to 4.85789E-11	2853	0.2853		<=4.85789E-11	6452	0.6452		=>4.85789E-11	3548	0.3548
4.85789E-11 to 6.16329E-11	1668	0.1668		<=6.16329E-11	8120	0.812		=>6.16329E-11	1880	0.188
6.16329E-11 to 7.46869E-11	856	0.0856		<=7.46869E-11	8976	0.8976		=>7.46869E-11	1024	0.1024
7.46869E-11 to 8.7741E-11	433	0.0433		<=8.7741E-11	9409	0.9409		=>8.7741E-11	591	0.0591
8.7741E-11 to 1.00795E-10	263	0.0263		<=1.00795E-10	9672	0.9672		=>1.00795E-10	328	0.0328
1.00795E-10 to 1.13849E-10	107	0.0107		<=1.13849E-10	9779	0.9779		=>1.13849E-10	221	0.0221
1.13849E-10 to 1.26903E-10	91	0.0091		<=1.26903E-10	9870	0.987		=>1.26903E-10	130	0.013
1.26903E-10 to 1.39957E-10	48	0.0048		<=1.39957E-10	9918	0.9918		=>1.39957E-10	82	0.0082
1.39957E-10 to 1.53011E-10	22	0.0022		<=1.53011E-10	9940	0.994		=>1.53011E-10	60	0.006
1.53011E-10 to 1.66065E-10	22	0.0022		<=1.66065E-10	9962	0.9962		=>1.66065E-10	38	0.0038
1.66065E-10 to 1.79119E-10	9	0.0009		<=1.79119E-10	9971	0.9971		=>1.79119E-10	29	0.0029
1.79119E-10 to 1.92173E-10	11	0.0011		<=1.92173E-10	9982	0.9982		=>1.92173E-10	18	0.0018
1.92173E-10 to 2.05227E-10	8	0.0008		<=2.05227E-10	9990	0.999		=>2.05227E-10	10	0.001
2.05227E-10 to 2.18281E-10	4	0.0004		<=2.18281E-10	9994	0.9994		=>2.18281E-10	6	0.0006
2.18281E-10 to 2.31335E-10	2	0.0002		<=2.31335E-10	9996	0.9996		=>2.31335E-10	4	0.0004
2.31335E-10 to 2.44389E-10	2	0.0002		<=2.44389E-10	9998	0.9998		=>2.44389E-10	2	0.0002
2.44389E-10 to 2.57443E-10	2	0.0002		<=2.57443E-10	10000	1		=>2.57443E-10	1	0.0001
>2.57443E-10	0	0
Bin Size	1.3054e-11
Number of bins	21
# of Sims	Avg Value	% Chg		Std Dev.	% Chg
125	4.32369e-11			2.21517e-11
250	4.34784e-11	0.00558655		2.16089e-11	-0.024504
500	4.38353e-11	0.00820783		2.13314e-11	-0.0128389
1000	4.54527e-11	0.0368981		2.31867e-11	0.086974
2000	4.62623e-11	0.0178098		2.41145e-11	0.0400131
4000	4.65453e-11	0.00611839		2.37642e-11	-0.0145257
8000	4.63865e-11	-0.00341077		2.39701e-11	0.00866292
10000	4.66233e-11	0.00510298		2.40887e-11	0.00494829

## Sheet: HQ Results
HQ Results
Minimum result	6.23517e-05				0.000271413	Study value
Maximum result	0.00170461				0.4948	of results are equal or lower
Expected value	0.000308707				0.5052	of results are equal or greater
Std Deviation	0.000159499
Out of 10000 simulations		Of those with numeric values:
10000 had numeric values.			5% <=	0.000132089
0 had error values.			10% <=	0.000155327
			15% <=	0.000173383
			20% <=	0.000190166
			25% <=	0.000205366
			30% <=	0.000219376
			35% <=	0.000232402
			40% <=	0.000245582
			45% <=	0.000259186
			50% <=	0.000273142
			55% <=	0.000288451
			60% <=	0.000304175
			65% <=	0.000323558
			70% <=	0.000344071
			75% <=	0.000368645
			80% <=	0.000398897
			85% <=	0.000439159
			90% <=	0.000498037
			95% <=	0.000605427
			100% <=	0.00170461
If HQ is:				0.000271413	0.4948	of results are equal or lower
(Chg to do what ifs)					0.5052	of results are greater
					Cumulative				Cumulative
HQ	frequency:				frequency:				frequency:
<=6.23517E-05	1	0.0001		<=6.23517E-05	1	0.0001		=>6.23517E-05	10000	1
6.23517E-05 to 0.000148787	842	0.0842		<=0.000148787	843	0.0843		=>0.000148787	9157	0.9157
0.000148787 to 0.000235221	2756	0.2756		<=0.000235221	3599	0.3599		=>0.000235221	6401	0.6401
0.000235221 to 0.000321656	2853	0.2853		<=0.000321656	6452	0.6452		=>0.000321656	3548	0.3548
0.000321656 to 0.000408091	1668	0.1668		<=0.000408091	8120	0.812		=>0.000408091	1880	0.188
0.000408091 to 0.000494526	856	0.0856		<=0.000494526	8976	0.8976		=>0.000494526	1024	0.1024
0.000494526 to 0.000580961	433	0.0433		<=0.000580961	9409	0.9409		=>0.000580961	591	0.0591
0.000580961 to 0.000667395	263	0.0263		<=0.000667395	9672	0.9672		=>0.000667395	328	0.0328
0.000667395 to 0.00075383	107	0.0107		<=0.00075383	9779	0.9779		=>0.00075383	221	0.0221
0.00075383 to 0.000840265	91	0.0091		<=0.000840265	9870	0.987		=>0.000840265	130	0.013
0.000840265 to 0.0009267	48	0.0048		<=0.0009267	9918	0.9918		=>0.0009267	82	0.0082
0.0009267 to 0.001013135	22	0.0022		<=0.001013135	9940	0.994		=>0.001013135	60	0.006
0.001013135 to 0.001099569	22	0.0022		<=0.001099569	9962	0.9962		=>0.001099569	38	0.0038
0.001099569 to 0.001186004	9	0.0009		<=0.001186004	9971	0.9971		=>0.001186004	29	0.0029
0.001186004 to 0.001272439	11	0.0011		<=0.001272439	9982	0.9982		=>0.001272439	18	0.0018
0.001272439 to 0.001358874	8	0.0008		<=0.001358874	9990	0.999		=>0.001358874	10	0.001
0.001358874 to 0.001445309	4	0.0004		<=0.001445309	9994	0.9994		=>0.001445309	6	0.0006
0.001445309 to 0.001531744	2	0.0002		<=0.001531744	9996	0.9996		=>0.001531744	4	0.0004
0.001531744 to 0.001618178	2	0.0002		<=0.001618178	9998	0.9998		=>0.001618178	2	0.0002
0.001618178 to 0.001704613	2	0.0002		<=0.001704613	10000	1		=>0.001704613	1	0.0001
>0.001704613	0	0
Bin Size	8.64348e-05
Number of bins	21
# of Sims	Avg Value	% Chg		Std Dev.	% Chg
125	0.000286285			0.000146673
250	0.000287884	0.00558655		0.000143079	-0.024504
500	0.000290247	0.00820783		0.000141242	-0.0128389
1000	0.000300957	0.0368981		0.000153527	0.086974
2000	0.000306317	0.0178098		0.00015967	0.0400131
4000	0.000308191	0.00611839		0.00015735	-0.0145257
8000	0.00030714	-0.00341077		0.000158714	0.00866292
10000	0.000308707	0.00510298		0.000159499	0.00494829

## Sheet: Simulation Input Values 1
Sim #	BW	Conc	ED
1	45.2592	15.7927	8.55865
2	40.657	16.5085	7.92465
3	33.0886	22.2929	9.15222
4	16.8542	12.1239	8.12226
5	39.1182	26.8057	9.32771
6	46.5404	25.5722	7.99718
7	32.2581	17.7179	8.16515
8	50.8367	6.21638	8.28916
9	47.0808	23.9248	9.61253
10	26.3688	16.4109	7.42586
11	35.4001	17.8419	9.62478
12	36.5984	19.4922	8.52858
13	50.7445	14.69	8.63942
14	36.5306	12.8458	8.66821
15	38.0177	14.3583	8.91926
16	44.6972	20.7289	8.91049
17	47.6488	17.1369	8.36578
18	26.3792	13.3217	7.84048
19	11.8419	19.7856	8.59475
20	41.96	16.3453	9.29734
21	26.2707	16.489	8.20005
22	47.7786	19.0617	8.19589
23	50.425	10.5131	7.51635
24	41.1645	15.8046	10.2524
25	9.36467	16.9691	9.4723
26	38.3916	15.7548	9.11759
27	29.0767	14.806	8.67063
28	34.8085	10.2882	6.8667
29	21.0661	14.62	9.41217
30	30.179	12.0244	9.46918
31	44.5196	19.3584	8.76097
32	40.5728	12.8647	7.80017
33	20.0623	14.6462	7.93005
34	42.7381	14.2059	10.2191
35	36.0666	13.1424	8.6989
36	29.7343	15.3086	9.25314
37	28.0373	8.39405	10.1834
38	37.4976	17.3759	10.3058
39	34.854	11.3985	8.75199
40	31.6488	19.4287	9.60703
41	28.7852	15.024	8.02541
42	42.1071	22.2133	9.41024
43	53.7937	9.43131	9.80665
44	29.1071	9.69061	9.00419
45	48.8214	23.4991	8.8719
46	38.2054	23.0186	8.78377
47	29.3514	13.3669	9.89488
48	52.8508	22.5563	9.21099
49	34.1858	11.6704	8.747
50	38.6038	11.9928	8.83121
51	34.7148	17.8885	9.18047
52	40.7159	11.42	10.5796
53	28.4787	15.8528	7.59733
54	50.4124	8.35599	9.48772
55	45.9277	17.7416	8.83985
56	37.5209	10.1184	7.64353
57	26.1158	9.55531	7.31698
58	40.1686	14.0037	9.14117
59	40.8175	15.8225	8.56458
60	39.3302	19.4307	8.09197
61	24.3884	10.9325	9.52342
62	19.9794	16.4687	9.17609
63	33.3131	17.4631	8.99811
64	44.3309	17.6461	8.67809
65	34.5254	16.6035	11.9883
66	48.5903	21.8342	7.99718
67	32.8494	14.7369	9.75231
68	46.8399	14.6984	8.23631
69	42.0572	18.1306	9.39852
70	46.39	20.6768	8.81983
71	32.6265	23.1709	8.93366
72	47.6511	9.29185	9.66653
73	38.0905	13.4885	10.0964
74	16.6976	22.1302	8.29813
75	25.9034	13.7139	10.2333
76	39.1173	14.5392	8.95408
77	27.4075	25.3032	8.89025
78	35.4263	20.9794	8.71901
79	19.2208	13.3519	9.0542
80	32.8668	16.1153	9.1484
81	37.9854	13.7388	8.4393
82	32.8888	12.7343	9.24233
83	42.0336	16.4109	9.18272
84	34.0203	15.319	8.74109
85	27.7178	10.7849	8.74732
86	15.2807	10.6869	10.8446
87	50.9566	18.908	9.34266
88	18.057	11.3445	9.75701
89	20.7783	17.0068	7.98425
90	50.4051	11.7953	8.45308
91	31.9102	11.2169	8.5513
92	34.1261	8.86201	9.42983
93	20.9389	16.68	10.4941
94	43.2117	7.8122	8.15545
95	29.7153	15.6072	9.48143
96	35.7536	14.539	10.446
97	38.664	13.2345	8.86967
98	50.5453	10.8322	7.94882
99	35.3632	17.0613	10.8305
100	18.8723	14.3618	8.12784
101	30.9467	23.5033	9.47487
102	19.3164	14.6464	9.59478
103	34.5784	18.1463	7.90747
104	35.4263	18.1221	8.76702
105	33.1901	18.9588	8.64641
106	37.6351	15.0026	9.24511
107	26.3309	13.6859	9.96592
108	40.1851	8.85712	9.02695
109	22.8316	11.7676	8.69773
110	29.1096	18.9863	8.31411
111	46.885	15.0811	8.34461
112	32.6505	15.0512	8.66922
113	36.5959	27.5503	8.711
114	47.3844	9.99308	9.99076
115	31.9305	17.9524	9.06053
116	45.5076	16.1068	7.38985
117	46.471	17.006	10.1405
118	48.0774	10.3365	8.82119
119	39.2348	20.5825	7.68171
120	33.3892	16.5049	9.88496
121	52.2432	20.518	8.97549
122	42.3701	7.31752	8.377
123	27.2549	7.88709	9.06761
124	37.4088	8.82667	8.56986
125	42.6534	17.0515	9.84431
126	42.1129	14.8955	8.61654
127	37.5919	19.1781	8.06085
128	27.2134	10.8258	7.36515
129	28.8551	13.3938	9.05355
130	17.0729	9.35601	9.14319
131	49.0177	14.1571	9.46615
132	42.5053	24.6875	8.17931
133	36.5834	21.1572	8.75848
134	36.1849	9.67035	9.10729
135	38.6612	18.8665	8.73549
136	22.9984	17.0374	9.17205
137	37.2687	10.5979	8.8322
138	45.542	20.6143	8.54198
139	27.6796	15.053	8.83883
140	30.2644	16.9113	8.99791
141	59.1365	15.302	10.0027
142	52.7908	9.31923	9.67164
143	51.58	16.7394	8.72728
144	23.1208	10.7773	7.29221
145	30.4581	7.47553	9.4401
146	34.2083	19.7548	8.22978
147	13.9482	18.3832	9.06935
148	38.5271	12.8234	8.82152
149	20.6736	8.26995	9.52285
150	50.4605	19.0344	8.7138
151	43.7467	18.4258	8.46914
152	26.4224	13.3451	9.35262
153	51.9932	14.9828	9.21908
154	47.6798	20.5745	7.13977
155	29.9573	9.49426	6.99493
156	37.7891	15.8929	9.2183
157	21.1288	17.8845	8.68863
158	18.0678	26.1562	8.6055
159	39.9558	14.0686	10.0052
160	27.3276	7.70442	9.0723
161	37.9734	22.4312	7.23966
162	21.6336	9.95697	9.78908
163	28.1737	22.7641	9.96269
164	48.898	6.5256	9.32247
165	45.8336	13.6757	8.62833
166	52.1044	15.7286	9.65325
167	37.7778	25.2099	8.63647
168	33.6801	9.48897	9.69371
169	25.8067	18.0825	9.02778
170	20.8142	14.168	9.92659
171	25.2972	17.9633	9.13742
172	26.2547	27.1471	8.7361
173	30.6554	13.6492	8.19379
174	38.1845	16.4152	9.18284
175	39.2957	19.6047	8.79686
176	15.1527	16.0181	9.35268
177	31.6636	10.2124	9.8952
178	39.1867	15.989	8.4206
179	27.8013	21.2438	7.40301
180	40.9832	14.4953	8.72418
181	49.1356	17.2029	8.40181
182	29.6752	19.2774	8.87405
183	29.6977	11.5128	8.73642
184	27.6384	8.42281	8.60303
185	23.0462	15.4573	9.29254
186	41.7507	7.65993	7.62648
187	38.753	12.8297	9.46729
188	22.7007	14.9448	7.04668
189	39.9883	13.6005	8.77047
190	33.714	18.8732	9.76657
191	46.9594	11.592	8.04308
192	35.9645	16.3101	8.30611
193	54.4566	14.4691	8.79167
194	34.8205	11.243	9.56527
195	28.2952	21.8406	9.3359
196	24.3027	11.4773	9.27513
197	25.8368	12.3466	9.58627
198	36.3698	13.6203	7.92637
199	50.5526	14.4139	9.98592
200	33.0796	16.5176	8.97029
201	28.4646	20.3345	8.22728
202	37.5119	15.9455	8.47482
203	38.7248	20.8774	8.17287
204	30.9272	15.6564	8.76523
205	30.6145	10.7011	8.93136
206	39.0877	20.6456	8.98909
207	43.427	14.5199	8.87233
208	30.045	14.8568	9.84143
209	20.0915	16.6274	8.03322
210	46.9891	10.2247	6.92709
211	41.758	17.6291	7.7958
212	30.5788	8.1105	9.46612
213	53.6881	10.9121	9.3956
214	41.9747	20.6999	8.40922
215	17.6277	6.16715	6.97313
216	33.1175	24.1312	8.26702
217	47.9824	15.1091	8.36021
218	44.3896	19.9648	9.25445
219	36.5008	18.934	8.87847
220	29.6794	18.4154	8.82542
221	22.8812	11.9005	8.15708
222	28.1702	15.4647	8.38545
223	15.6825	18.5685	8.55341
224	29.5588	7.30556	8.75547
225	30.9392	20.7607	9.55553
226	25.1171	22.7554	7.93636
227	39.3589	9.236	8.36248
228	35.9827	12.0779	7.48119
229	15.3926	16.5113	8.79572
230	39.0722	11.6033	8.51938
231	27.4796	23.8871	8.56152
232	49.6601	13.4859	9.6516
233	33.0494	17.0532	8.17078
234	36.5334	15.4752	8.15579
235	48.7204	15.1506	7.79314
236	19.3943	13.9227	9.73624
237	41.9427	14.1852	9.28913
238	28.6206	8.14059	7.78433
239	25.6139	12.6897	8.17958
240	53.6741	21.0597	9.09573
241	26.5352	14.9394	9.33704
242	30.1275	13.382	9.4647
243	27.67	11.0165	7.39038
244	38.39	23.9764	9.05768
245	30.26	17.3288	8.19124
246	36.5608	17.5513	8.57679
247	32.9494	18.1555	9.52952
248	37.477	18.0715	8.23701
249	48.3062	20.2926	10.0223
250	18.3052	20.0569	9.41379
251	25.0513	12.9969	8.72411
252	33.7694	17.4757	8.70388
253	41.3618	15.9686	10.1327
254	36.0564	14.9206	8.58893
255	51.8328	12.7976	9.10684
256	23.8154	15.7773	9.81333
257	57.4355	17.7755	9.29345
258	28.6193	19.2055	8.696
259	27.2137	16.5015	9.07796
260	26.2208	9.54348	7.97896
261	46.9277	23.5087	9.895
262	47.8548	7.54416	8.55054
263	30.1698	20.5468	8.84517
264	20.9037	19.312	9.30609
265	39.0116	14.7305	9.19476
266	45.0786	11.6788	9.08458
267	14.863	8.99416	9.92999
268	32.1588	20.6224	8.1116
269	24.3824	12.0719	7.6094
270	26.9493	11.4266	9.24703
271	32.7208	16.9463	9.14244
272	48.0193	12.0395	9.08254
273	54.5258	10.6103	8.46782
274	23.0214	10.9578	8.91078
275	32.3053	23.6782	8.77878
276	38.6994	7.82408	8.82215
277	19.5718	13.8301	9.12821
278	53.8693	6.41197	9.63801
279	33.9683	15.856	8.46765
280	28.8665	13.2028	9.54133
281	35.5376	13.585	8.50695
282	43.8683	16.0443	9.5252
283	43.9753	17.8877	8.18633
284	27.2286	14.9412	8.16937
285	45.8278	6.76619	8.18678
286	21.5341	17.6439	10.272
287	33.4221	10.6592	8.409
288	31.9109	14.6269	9.19506
289	45.8706	12.9841	8.62959
290	30.0419	11.9628	8.57637
291	55.2953	14.0102	8.41848
292	21.8944	21.0245	8.37464
293	48.3399	15.7317	8.61995
294	19.4396	17.13	7.59171
295	47.6489	15.3939	7.54532
296	29.1827	18.1199	8.3905
297	23.4256	16.8802	8.10916
298	27.923	11.5172	9.13913
299	54.0104	12.9505	8.55654
300	57.786	18.0285	8.27456
301	27.5228	10.6817	9.28869
302	47.4722	13.0405	8.6751
303	26.3668	15.7683	8.12949
304	40.8247	16.6406	9.69659
305	23.4541	18.6616	9.55594
306	35.5082	9.86597	8.33508
307	37.4916	15.0054	9.71045
308	45.8258	12.6289	8.81915
309	24.014	19.9844	10.232
310	41.794	14.722	8.31239
311	35.7296	17.4539	9.95884
312	31.3917	12.2736	8.72872
313	32.2614	15.2006	8.99833
314	17.3526	18.8113	8.40388
315	17.1749	8.97727	9.27953
316	37.9892	14.6753	10.1557
317	32.4525	16.4668	9.05365
318	38.2538	18.1367	7.17542
319	47.9437	12.9709	9.20847
320	39.9307	9.19466	8.13096
321	52.3004	13.9109	8.06669
322	23.2738	16.4809	10.2177
323	21.444	8.83005	9.15077
324	35.0596	8.9917	8.75187
325	16.1676	22.9096	8.77329
326	39.9278	11.9037	7.43159
327	43.1236	12.0113	8.79777
328	17.322	13.6888	9.99743
329	35.524	13.7625	8.33193
330	23.6208	10.4008	7.80233
331	52.4254	16.1728	9.6286
332	36.2188	17.0323	8.42194
333	36.9299	16.6472	7.7613
334	42.218	20.8338	10.0191
335	44.9823	12.3264	8.76427
336	33.438	15.3442	9.51529
337	34.2885	11.4243	8.00843
338	45.3765	17.0393	8.84621
339	32.0107	13.6251	8.51817
340	21.6559	15.4092	9.23957
341	46.8277	18.5403	8.31367
342	48.5198	7.91437	8.2494
343	21.0141	16.4868	8.72306
344	16.6832	18.5074	9.02861
345	53.0327	22.9355	7.68349
346	49.0628	14.612	9.20295
347	40.4826	14.9065	8.93308
348	30.3246	16.6254	8.64411
349	26.8536	17.9857	8.95043
350	45.761	23.6857	9.14034
351	40.6904	14.6855	8.56631
352	32.4356	17.0076	8.40719
353	31.6268	16.1358	9.47887
354	34.8245	15.5137	8.06187
355	41.6087	16.6918	9.55321
356	44.2006	21.1531	7.48267
357	27.8176	13.867	9.71594
358	36.385	12.4181	9.77029
359	28.2342	14.5232	9.48634
360	31.1139	14.4035	8.93386
361	28.731	12.0603	8.09856
362	44.442	26.2039	11.3118
363	40.3531	18.3202	9.73903
364	44.6234	20.2353	9.23281
365	22.4365	17.5153	9.47054
366	41.6969	14.5255	9.67992
367	32.9973	10.3766	8.83965
368	26.0386	16.7591	8.45551
369	33.0896	6.87154	8.7193
370	30.5851	17.7312	8.64327
371	35.869	15.1298	8.49122
372	18.218	22.6905	8.78698
373	22.6836	11.2237	8.2338
374	26.0702	13.9445	8.58778
375	30.4936	17.0517	9.52704
376	29.8558	15.9534	8.04141
377	36.0304	14.0185	10.2257
378	40.1176	15.3111	8.00039
379	34.7244	17.1549	8.06702
380	15.6394	11.1979	9.66779
381	27.0484	15.5094	9.34537
382	36.2913	21.3179	8.85929
383	24.7831	21.4078	8.36057
384	40.8906	18.7578	9.66811
385	40.6684	15.0191	8.96424
386	43.6321	22.3604	7.3878
387	36.2686	19.172	8.34059
388	36.0562	16.0725	8.51167
389	36.3558	19.9172	8.51004
390	36.1017	11.7701	8.29166
391	37.3278	14.4127	10.4983
392	32.1508	16.8096	10.4072
393	49.1764	19.9757	7.94511
394	36.9167	18.552	8.81051
395	61.5314	17.3304	9.88529
396	29.0538	16.5939	9.48075
397	45.9498	15.0267	9.08293
398	39.3779	13.9211	9.46358
399	29.3302	15.9137	8.35484
400	19.1733	17.6846	8.17207
401	34.1004	21.0841	10.3095
402	33.6966	12.3895	7.42526
403	41.8775	17.6169	8.45197
404	27.6792	20.2438	8.05678
405	54.9844	11.9639	8.99286
406	36.6141	19.9532	8.4441
407	35.6532	10.7425	7.50544
408	31.2174	13.6149	9.85156
409	42.0148	13.4142	8.8705
410	43.4055	21.6886	9.23376
411	24.4816	15.5715	10.6282
412	26.8394	14.1578	9.20672
413	32.0701	7.99133	9.81884
414	39.0438	24.8061	8.11766
415	34.6764	8.40897	8.57902
416	38.8489	11.7823	9.35606
417	29.9305	17.4642	9.15955
418	29.4585	20.5128	9.16805
419	28.991	15.3468	8.66008
420	30.9665	12.5647	9.2509
421	49.2704	15.1842	8.93588
422	34.5004	16.1967	9.11966
423	56.6539	15.9678	10.3683
424	27.1225	17.7288	7.60803
425	44.018	18.9965	8.50516
426	45.3354	13.828	9.14446
427	33.3401	11.1234	8.67944
428	38.4492	8.71002	10.0332
429	40.4801	7.97536	8.39949
430	31.3892	11.6088	8.48989
431	38.8662	19.1737	9.23605
432	21.7302	14.718	8.44342
433	19.5233	13.7646	10.0395
434	34.7025	12.9096	8.78524
435	40.7722	19.6265	9.34063
436	29.8551	14.6625	7.72298
437	28.2202	23.9194	7.81581
438	44.5317	22.2591	9.0221
439	47.6833	15.3633	7.62496
440	27.8989	20.547	9.32815
441	30.8658	23.3774	8.88953
442	39.0663	15.6628	8.7072
443	46.5282	15.964	9.03015
444	31.9457	12.2108	9.29391
445	32.7304	18.5257	10.5004
446	38.9669	12.0681	9.93904
447	26.2236	17.3385	8.53675
448	38.9508	19.6122	9.38137
449	41.7926	13.5122	8.77065
450	26.2786	11.7771	9.22368
451	34.4727	18.9391	9.67117
452	26.1813	15.7276	8.30901
453	29.74	12.7653	8.34574
454	41.7054	18.4754	8.99275
455	22.6302	18.8451	10.5683
456	29.294	16.9339	8.82793
457	37.5878	7.2318	9.79407
458	42.4359	16.8835	9.82243
459	20.7591	20.7256	8.68063
460	33.8985	15.1588	9.22752
461	35.1592	15.3394	9.35765
462	30.4548	7.79565	9.20798
463	25.9406	19.58	8.75621
464	35.5278	15.5904	9.21332
465	80.5582	16.523	9.55902
466	41.5088	20.3552	8.18299
467	40.3224	10.5017	9.719
468	46.6726	16.5028	7.93788
469	34.3539	14.8335	9.42169
470	20.9842	20.6764	8.99232
471	55.1321	20.2048	7.93196
472	44.4505	15.5973	9.32689
473	24.2606	15.304	8.30094
474	41.9344	16.9871	10.3608
475	37.0133	12.4494	9.18321
476	35.3388	19.6456	7.9941
477	44.0159	24.0565	8.52193
478	33.0381	12.5304	9.06106
479	43.1036	8.52923	9.63671
480	48.4493	20.4655	8.69963
481	30.1244	18.5877	8.8999
482	16.909	17.8759	8.68999
483	41.7287	19.2146	9.00434
484	40.5193	8.71269	8.8992
485	36.4667	11.3676	9.09277
486	28.2708	8.99039	9.15763
487	36.7979	13.1697	9.19382
488	28.2555	15.7329	8.6855
489	10.0555	14.7869	7.87681
490	9.8045	14.655	10.6342
491	29.6066	18.2704	8.224
492	20.727	17.9716	9.37143
493	15.4921	22.1876	8.99009
494	30.7682	16.0651	9.04923
495	25.8007	15.9285	8.12474
496	43.4608	16.8974	9.42538
497	32.3252	9.49741	9.33934
498	38.0784	12.2647	9.66363
499	26.5181	21.7156	8.74132
500	32.3203	5.96299	8.60226
501	54.4019	13.7054	8.43429
502	46.6808	17.773	9.65412
503	54.7546	14.0931	10.2303
504	54.773	15.2905	8.43423
505	28.1133	12.872	7.99804
506	22.166	16.01	8.92422
507	36.6464	9.26473	10.1668
508	42.581	16.796	8.26896
509	28.4999	16.774	9.50626
510	45.7333	19.9987	7.72796
511	36.0727	13.1749	9.02294
512	41.0631	19.7957	7.63728
513	22.4837	21.3461	8.36927
514	26.0422	12.1926	7.5397
515	50.7123	11.1875	9.93224
516	40.3901	19.0104	8.37999
517	33.9193	17.3433	8.35126
518	32.3757	12.3058	8.93138
519	32.9051	13.1486	8.98568
520	17.3385	15.6711	9.31053
521	43.0775	11.4836	8.72644
522	39.8407	15.0149	9.047
523	21.1666	21.072	9.08291
524	29.5759	18.4825	9.19818
525	31.4056	17.5356	7.9186
526	44.7815	13.9811	9.72884
527	33.5095	20.0691	8.37475
528	39.5636	17.1163	9.90129
529	40.2617	15.2722	8.29686
530	35.3466	17.6579	8.50429
531	40.648	8.91652	8.6479
532	34.5458	12.1262	9.15341
533	37.9912	22.8728	9.49708
534	36.8181	22.8719	10.666
535	20.4931	17.2778	8.47444
536	38.2416	24.4627	9.32785
537	23.5334	19.8925	8.89871
538	17.6357	14.3866	9.68712
539	33.8605	9.94712	9.39036
540	33.7199	16.741	8.1712
541	37.8888	18.9563	8.63321
542	23.719	18.7545	8.80503
543	28.742	14.3759	8.68252
544	41.7657	20.9006	9.60266
545	51.0304	19.6898	8.20223
546	39.4083	11.3487	7.6911
547	44.4445	21.6381	8.81644
548	33.311	17.9119	8.33273
549	48.1402	10.5052	8.59647
550	34.197	14.5891	7.38811
551	39.1232	21.1192	9.21672
552	24.3584	13.6719	9.29118
553	13.9047	15.8731	8.28206
554	41.0738	18.1509	7.29899
555	31.3543	15.255	7.54902
556	41.3869	12.6004	7.57069
557	25.5793	18.1977	7.91603
558	34.1123	24.5734	8.43819
559	18.7132	17.0657	9.46231
560	35.1622	14.5722	9.2613
561	34.8105	16.061	7.95585
562	41.9512	8.84276	8.0332
563	50.1623	18.1897	8.61693
564	53.808	13.9324	7.51563
565	45.2791	15.8659	7.99005
566	37.0444	17.5322	9.27846
567	44.8403	18.8068	9.17685
568	36.0853	19.5064	8.95166
569	31.5454	10.1943	8.23273
570	34.1276	13.1611	9.048
571	35.2846	12.284	8.13609
572	16.8911	11.6743	9.11813
573	21.5704	19.8047	8.48203
574	27.5443	14.7793	9.06277
575	17.7695	19.5627	9.53542
576	41.6851	21.2457	9.81962
577	19.2404	15.8798	8.23517
578	29.6988	18.4617	9.84651
579	29.5133	13.3857	7.61419
580	36.703	16.5573	10.0287
581	30.8185	10.4799	9.05086
582	25.3929	17.3739	8.54414
583	24.3833	8.30227	8.08397
584	53.7742	14.0504	8.11193
585	31.4045	17.489	8.18859
586	23.6071	10.8362	8.75294
587	29.9221	7.8982	9.13427
588	59.6133	21.7836	7.9315
589	34.5744	14.449	9.84221
590	38.568	15.1853	7.79915
591	37.2231	15.5015	8.61949
592	29.2781	24.781	8.49308
593	31.1717	24.0155	8.57149
594	36.02	17.1389	9.05109
595	38.2095	12.2357	8.63793
596	30.3564	14.7	7.79103
597	37.5725	16.2834	8.82615
598	24.6122	15.1162	9.52082
599	41.0998	16.7503	7.95783
600	33.4101	6.87952	8.23107
601	22.0097	9.42693	8.85211
602	20.0895	17.435	8.30324
603	24.2728	21.2735	7.88523
604	39.8398	16.8559	8.77709
605	20.1025	18.0123	9.82482
606	58.0772	16.5792	8.80616
607	19.6764	24.8596	8.13978
608	25.6994	16.1586	9.7599
609	47.0008	18.9884	9.36023
610	49.2983	12.1419	8.68656
611	22.6929	21.3467	7.89291
612	36.8316	14.2025	8.15024
613	36.438	13.5389	10.0265
614	36.0351	14.23	8.42783
615	26.804	11.2139	8.34614
616	53.8071	16.5944	8.78887
617	39.7138	18.5103	8.27953
618	47.2428	17.6372	8.87411
619	13.873	12.1649	9.23735
620	34.2043	6.15602	9.20606
621	27.2513	10.8228	8.61397
622	28.1187	14.7672	9.25961
623	41.7717	7.78694	8.65012
624	30.986	9.95091	8.02283
625	55.9984	13.7013	9.01435
626	53.7385	20.4421	9.96051
627	30.4995	11.2204	9.66499
628	26.8334	16.0334	8.89935
629	33.1214	15.8982	9.35402
630	18.0486	15.7065	9.37647
631	25.822	13.0971	8.23001
632	44.3416	18.8561	9.52377
633	33.9755	16.0034	8.12614
634	26.3779	15.3289	8.06045
635	54.7066	10.8586	8.11391
636	20.7005	11.5388	8.74877
637	36.8422	22.7927	8.93297
638	14.8494	6.79115	8.7545
639	48.3676	15.5599	8.6657
640	27.2693	19.0257	8.34255
641	27.6344	14.7351	8.45248
642	50.2114	17.5301	8.59259
643	32.0409	20.0846	8.58016
644	25.6454	11.7735	9.65284
645	35.3346	10.3153	8.72821
646	35.3721	14.6311	11.0806
647	39.7268	14.5637	8.33383
648	34.1154	13.2029	8.78132
649	40.8654	12.5195	9.40162
650	24.235	14.3295	8.1596
651	34.9515	14.7674	8.58666
652	30.6863	18.1897	9.6057
653	34.4318	22.955	8.45347
654	33.5356	16.3444	8.20713
655	37.1365	16.2069	9.16735
656	24.9551	19.9402	8.85795
657	26.0039	14.3626	9.96894
658	32.8809	20.0543	8.91256
659	46.884	17.2136	8.89538
660	12.1088	22.658	8.38937
661	31.6656	11.3012	8.52725
662	40.4777	13.3834	7.68969
663	25.3927	18.1095	9.51904
664	31.9713	17.6469	10.0023
665	36.8027	20.9096	8.22028
666	53.5187	20.9039	8.4676
667	30.6034	11.6992	8.10778
668	39.7601	17.5443	8.39625
669	30.1618	23.7354	8.99235
670	38.742	23.5289	8.16803
671	22.9875	14.764	8.90568
672	21.7006	15.3067	8.46968
673	37.3427	20.6498	9.03823
674	22.7306	16.7584	9.32386
675	42.9587	13.8421	7.45529
676	37.8974	18.8462	9.34001
677	23.8581	13.9438	8.63301
678	40.9666	18.625	8.51798
679	38.5935	15.8982	9.75606
680	38.2475	18.0502	9.30854
681	34.5429	11.0848	8.2711
682	27.4582	19.3005	10.3454
683	24.6388	13.9554	9.5849
684	24.2666	17.6721	9.60495
685	46.7375	19.4409	10.2213
686	46.1529	14.1618	9.86172
687	15.5214	16.5873	9.05955
688	25.8576	11.0432	8.45798
689	33.6333	18.153	9.2807
690	44.8248	14.8982	8.89454
691	33.9124	19.0654	8.50754
692	50.0403	15.6061	8.16051
693	36.9465	19.6277	6.73359
694	33.9373	15.0586	8.14341
695	32.5155	17.9701	8.80249
696	32.9239	17.449	8.09033
697	19.7696	20.4031	7.89427
698	25.9793	20.3846	9.98769
699	17.4782	22.9378	8.23234
700	37.4922	21.2439	7.47124
701	34.2518	12.8185	9.0219
702	25.9521	10.4202	7.49231
703	40.9182	19.0289	9.99639
704	36.1161	14.5102	7.9862
705	16.153	22.0884	9.03828
706	18.5872	18.3891	8.96204
707	46.0767	22.4118	9.00924
708	52.8466	25.1392	7.58949
709	20.864	6.62885	8.0741
710	37.5483	12.726	8.05158
711	28.9649	18.2163	8.80644
712	27.6964	18.1718	8.70959
713	50.747	13.6739	9.13036
714	35.8287	20.8064	9.4522
715	40.3741	12.6975	8.63174
716	38.6801	26.8378	7.6916
717	31.615	16.4335	9.12916
718	24.8625	19.8189	8.02798
719	45.6868	9.6034	9.98976
720	39.3979	18.629	7.80477
721	26.8401	9.03943	9.48526
722	34.1161	14.1548	9.55437
723	33.2163	22.0495	8.11834
724	36.7954	21.8379	9.04922
725	28.4162	18.5892	7.92789
726	31.7365	21.479	8.22347
727	26.2308	17.7389	8.76733
728	40.8883	11.5526	8.86353
729	23.4832	11.6654	8.63378
730	31.0973	12.1204	8.26856
731	57.0246	20.1591	9.0412
732	23.8336	28.1674	8.72892
733	17.7818	11.6787	7.64432
734	24.8084	12.4144	9.07057
735	22.7827	22.9371	8.08851
736	39.3522	18.5114	8.04569
737	52.9209	13.5678	7.36421
738	52.4194	19.2755	8.5539
739	36.8485	14.565	7.65405
740	47.146	12.6851	6.82742
741	46.356	21.8796	7.36857
742	31.6671	18.4214	8.31756
743	34.8895	16.3975	8.79542
744	37.9779	16.8717	9.53046
745	35.1854	11.5655	7.56987
746	36.055	13.6949	9.93619
747	40.984	24.3277	10.4094
748	42.9768	26.8992	9.8885
749	27.3675	18.2081	7.76216
750	31.0486	21.1726	6.94329
751	19.5524	22.384	9.44474
752	12.8645	7.20696	8.56143
753	9.98358	8.73674	7.83847
754	47.5602	15.9113	8.77237
755	27.6671	13.448	8.82282
756	16.9873	12.3866	8.92862
757	40.8371	18.5366	8.40581
758	31.5651	14.1787	8.63827
759	43.1367	16.9314	9.58505
760	18.7589	18.7517	7.3472
761	17.1849	13.5963	8.93854
762	25.1435	21.4991	9.60145
763	22.8751	11.7435	9.67538
764	31.2752	13.4813	8.74524
765	19.6793	23.4457	8.31269
766	24.9413	15.6474	7.44287
767	30.8539	21.6317	8.36671
768	30.9839	15.9998	7.33012
769	35.2052	22.2638	7.89962
770	16.8724	14.4227	9.32684
771	42.7162	19.687	10.7674
772	37.8214	13.4111	9.72575
773	19.2028	17.5606	8.93549
774	32.6279	18.154	7.64358
775	46.3905	13.1533	7.89314
776	30.3383	17.3717	7.417
777	53.5504	21.019	8.07987
778	38.2966	20.2582	8.15929
779	37.5381	13.4196	9.81217
780	22.3987	16.4286	8.4146
781	44.79	26.8891	8.5237
782	28.0645	9.35844	9.26507
783	9.40429	24.75	8.36932
784	41.3212	14.3804	9.14778
785	50.6315	19.4044	8.64869
786	31.9979	15.1602	7.14524
787	37.9791	13.3859	8.39943
788	30.7509	11.778	9.58434
789	30.0041	14.3622	9.30537
790	44.2778	20.4117	9.59886
791	44.9305	13.778	7.77553
792	19.4121	16.4682	7.17135
793	40.9931	13.8924	8.44772
794	34.3212	13.9005	8.61941
795	43.7122	14.0388	10.1025
796	31.2142	16.5696	9.80601
797	17.2347	10.8401	8.62526
798	36.335	20.9899	8.5087
799	23.3214	15.5905	9.29019
800	27.8066	9.59283	9.44186
801	43.5552	16.5762	8.30186
802	12.4065	13.6633	9.07779
803	33.446	14.1325	8.46215
804	45.7936	16.0776	8.29315
805	46.2203	25.2823	7.76991
806	23.5484	17.578	7.61035
807	40.9173	19.8843	7.68888
808	16.3309	14.353	8.04244
809	34.0811	18.2863	9.10845
810	45.8108	11.175	9.03474
811	37.7852	10.6989	9.4993
812	32.3658	6.60401	8.96907
813	66.2865	17.7422	8.31376
814	30.5673	14.3388	8.48578
815	18.213	20.1196	8.75227
816	15.7355	13.7527	11.1091
817	29.9073	15.3046	10.2657
818	37.991	7.8104	9.39452
819	26.4118	15.6165	9.17885
820	34.1953	13.5735	9.12066
821	28.0046	17.8475	6.67866
822	27.9397	17.3076	7.81577
823	40.065	17.3365	8.55783
824	46.1049	20.0453	8.12989
825	29.8756	13.9821	8.06687
826	16.0964	15.0793	8.11441
827	39.0908	20.0541	8.35767
828	33.8864	17.1373	8.70748
829	30.048	18.2898	9.2017
830	29.3299	17.267	8.19744
831	35.6831	6.11065	10.2122
832	31.0076	18.1016	9.14096
833	18.2784	11.2131	8.53004
834	21.9185	18.1558	8.54413
835	41.9812	11.1519	6.79734
836	37.1741	19.6697	9.42885
837	21.1548	15.7176	9.08333
838	19.0504	11.2714	9.4385
839	41.1536	9.92956	8.45153
840	14.9253	12.6237	7.74712
841	23.1837	14.9727	8.62572
842	45.6141	15.116	9.78624
843	27.7292	17.4415	9.76935
844	29.263	23.4614	10.1225
845	28.8405	13.1948	8.99699
846	41.2061	9.82567	9.35035
847	18.0562	23.5998	9.33565
848	25.2092	18.4228	8.09831
849	45.2612	13.8958	8.92596
850	23.0334	21.3792	8.76406
851	20.4795	7.44714	9.76806
852	45.1839	9.24042	7.57349
853	29.6042	12.9206	9.15972
854	46.8788	12.6296	8.9522
855	9.39607	15.4257	9.61046
856	44.2755	13.6964	8.70833
857	32.0819	24.6167	8.7529
858	37.3168	15.0062	8.81762
859	33.1888	9.45066	9.44284
860	33.309	17.9013	8.19151
861	32.1748	20.6208	9.61437
862	14.1461	11.9719	10.0995
863	36.4366	6.27457	9.79842
864	24.852	10.3799	9.50027
865	36.0626	12.0545	8.21029
866	33.0324	11.3507	7.15553
867	29.2175	19.4014	8.4442
868	35.0511	11.932	7.27008
869	29.9398	15.26	8.67594
870	38.5189	19.7614	8.07676
871	31.6784	18.0927	9.5375
872	54.3712	18.1561	10.0194
873	16.0252	18.6376	8.43232
874	38.2307	18.2287	9.01989
875	31.5706	15.3945	10.1836
876	50.4957	15.0293	8.94718
877	31.6763	17.666	8.05374
878	52.2167	6.91332	9.49198
879	20.1734	12.0267	7.91582
880	23.6688	14.6001	8.55769
881	40.5039	14.7136	9.11627
882	53.3392	12.11	8.46652
883	18.987	16.1099	7.70806
884	26.5307	10.0482	8.28282
885	51.5213	23.4877	9.12393
886	17.3422	18.7074	9.1008
887	16.0594	18.6801	8.51948
888	24.2657	17.8798	8.32698
889	43.7	8.38862	8.82089
890	45.6727	10.8924	9.60563
891	53.2715	11.4986	8.42666
892	27.7629	12.4918	9.38219
893	32.2237	14.3311	9.04043
894	49.218	15.6864	9.92828
895	14.9942	18.6687	9.96181
896	22.3882	10.3352	8.89738
897	39.4784	18.0138	8.21367
898	28.4645	16.2287	9.62993
899	42.6954	17.2951	8.97302
900	54.3054	10.861	9.34292
901	49.5112	10.8079	8.29887
902	44.8141	19.8313	8.29167
903	44.994	17.2209	9.67268
904	12.3935	22.7096	8.34045
905	34.9165	17.5167	8.54399
906	27.4068	22.401	8.62781
907	38.5095	7.84939	9.46338
908	34.422	13.4408	8.35853
909	44.5632	16.3265	7.46084
910	45.2826	10.6481	9.32188
911	32.3589	23.6586	7.35472
912	39.6934	26.1198	8.54509
913	11.7434	14.5527	7.47746
914	55.2435	10.6398	8.62742
915	28.0187	18.6755	8.59607
916	25.1583	15.1182	9.20366
917	34.4124	10.0856	7.66364
918	25.8803	9.84884	7.20128
919	38.3666	19.0463	9.25982
920	39.8143	11.8149	8.88536
921	34.458	13.2166	9.15748
922	37.3886	25.8492	9.92203
923	56.414	14.2717	9.92654
924	39.6744	9.78166	9.97381
925	42.072	21.9263	8.76963
926	14.6557	8.71608	8.80994
927	37.4286	10.9103	8.28672
928	39.575	9.55857	9.36598
929	37.391	9.3829	8.85503
930	57.6101	18.5411	9.2148
931	18.3412	13.8172	9.36021
932	34.7435	9.99254	9.84528
933	29.3289	12.1993	10.9797
934	36.1563	16.4915	7.39997
935	28.7451	17.8013	8.44657
936	57.8304	12.4372	9.42651
937	37.2179	14.5266	8.04684
938	43.3266	16.9089	8.94167
939	34.9728	13.1593	8.64309
940	37.8363	11.2776	7.63548
941	31.7041	23.0184	8.71068
942	51.7806	21.2844	8.53679
943	14.3495	24.6553	9.04615
944	43.9994	16.8781	10.7705
945	27.82	24.9332	8.57382
946	27.257	14.3723	9.12199
947	18.4994	20.5228	8.43833
948	43.6659	11.3334	7.90919
949	24.1663	15.3873	8.7672
950	36.3138	21.5512	8.03324
951	28.1959	20.4374	7.73331
952	61.3045	22.7472	9.13805
953	40.8208	24.2002	8.53081
954	38.8137	12.3428	7.93146
955	25.1696	14.4394	8.5403
956	22.6202	11.8012	8.63366
957	39.6627	13.1206	8.77409
958	41.4359	14.1168	8.49816
959	32.6599	18.6885	9.49747
960	55.6774	20.4343	9.54896
961	60.832	14.5724	9.83808
962	44.2257	18.7624	8.00414
963	50.7972	14.1342	8.80726
964	15.9706	8.74254	9.08125
965	11.9615	18.9045	8.35757
966	26.6659	18.3906	8.1574
967	37.2909	16.308	10.0748
968	29.8585	20.0714	6.92662
969	37.5922	15.8127	10.6357
970	46.95	11.8312	8.70561
971	36.2047	12.9615	9.26325
972	42.2802	12.8754	8.35659
973	14.4625	22.005	8.60914
974	36.1089	14.1822	8.42829
975	27.9315	23.5971	8.20762
976	24.0421	19.002	8.59904
977	37.4965	8.86955	9.76911
978	49.5565	15.7033	8.1711
979	34.1701	14.1153	8.86831
980	28.3321	22.07	7.99395
981	34.5025	17.975	9.56332
982	30.2714	9.36481	8.70224
983	36.6367	14.3683	8.53459
984	48.6711	16.9429	8.40331
985	20.0761	16.5548	7.66337
986	44.2451	9.75468	6.14207
987	45.0998	16.7699	9.08766
988	17.8273	19.7014	8.62844
989	31.0076	16.519	8.14682
990	46.0454	15.7327	9.97951
991	26.9923	14.3134	9.74186
992	25.3915	14.5853	8.25755
993	43.4455	14.6386	8.22317
994	48.7331	18.4481	10.0495
995	52.8967	21.2883	8.60882
996	32.2642	13.7009	8.65489
997	19.8651	18.5533	8.61859
998	38.357	14.0599	8.07929
999	40.2523	11.0212	9.18354
1000	12.4213	22.2451	8.63182
1001	37.5221	14.6077	8.48575
1002	41.1344	11.6116	8.1538
1003	48.3409	16.3304	8.49621
1004	26.3663	15.785	9.02467
1005	44.7004	8.56547	8.48253
1006	38.8204	14.2764	8.66059
1007	34.7647	15.5063	9.65392
1008	32.1431	13.3993	9.58093
1009	55.1442	20.7348	7.31968
1010	57.1306	6.70748	8.93822
1011	37.9137	12.5694	7.54563
1012	26.939	15.7153	10.6426
1013	18.7413	17.0801	8.26809
1014	38.4882	19.6341	8.75345
1015	49.0094	12.6321	8.48397
1016	27.4595	17.0404	9.86976
1017	26.4987	6.96852	7.62022
1018	45.0563	8.17161	7.96788
1019	34.2983	14.845	9.03636
1020	40.4129	10.3379	9.11922
1021	18.0224	12.0986	8.30911
1022	39.7989	21.5759	7.3421
1023	25.332	21.5751	8.25643
1024	35.792	13.0562	9.48663
1025	31.0547	16.7101	9.51278
1026	37.9306	20.3772	9.0859
1027	41.4514	21.5607	8.02493
1028	43.7004	13.2761	8.33937
1029	28.4907	20.0931	9.81665
1030	39.9061	14.9397	8.34786
1031	32.0006	23.3542	8.80046
1032	13.9198	17.2299	7.53415
1033	30.1047	12.0986	9.64161
1034	26.9086	12.8273	7.60686
1035	58.5893	13.0446	8.33371
1036	23.5017	17.2112	8.92075
1037	17.6449	11.1437	9.07451
1038	48.5856	12.0443	8.44291
1039	39.3586	15.7531	8.44429
1040	36.5359	14.3504	10.0932
1041	37.0931	13.9303	9.13833
1042	49.6707	7.16759	9.27081
1043	34.9754	16.6548	8.6096
1044	45.0382	20.433	9.69734
1045	19.8584	12.2836	8.57516
1046	34.9111	18.3921	9.37372
1047	41.5748	17.2216	9.74713
1048	22.7814	12.1027	9.06989
1049	13.8382	17.0521	8.60316
1050	39.2946	14.9383	9.68966
1051	32.4	13.134	8.83586
1052	28.0691	16.342	7.50865
1053	26.2873	14.6157	8.79363
1054	40.5617	8.42343	8.96565
1055	32.59	18.035	9.32443
1056	50.306	13.7857	8.6337
1057	42.8014	17.056	7.57798
1058	25.0746	20.3472	8.28249
1059	20.8484	16.024	8.87255
1060	33.9493	17.4959	7.93838
1061	31.0688	12.7683	8.76926
1062	37.4668	12.8901	9.14828
1063	32.0544	15.4705	9.22961
1064	36.9184	10.9657	10.0061
1065	41.5419	15.1357	9.59412
1066	31.0277	6.80235	10.6561
1067	33.5543	21.4275	9.0277
1068	24.5694	15.0209	7.72327
1069	42.1845	21.0096	7.83257
1070	28.6686	18.5606	7.93167
1071	26.4029	15.668	8.76674
1072	28.339	19.1467	9.60055
1073	46.1816	8.54859	9.91412
1074	32.3537	12.1086	9.54172
1075	30.5768	6.59899	9.78538
1076	43.6748	17.0758	10.1928
1077	28.6127	9.41067	8.80448
1078	35.8872	10.4196	10.7261
1079	36.2354	17.8094	9.43038
1080	32.6514	22.7374	9.30126
1081	34.9006	18.504	9.41842
1082	30.8735	12.3389	9.79106
1083	41.642	13.3316	8.24376
1084	9.52406	15.5619	8.0562
1085	42.9227	11.9128	8.59969
1086	28.2929	10.6025	7.49791
1087	36.5386	19.6989	8.66652
1088	13.516	13.8905	8.99054
1089	25.1249	16.0032	8.68507
1090	46.0218	10.4842	9.41194
1091	49.3955	21.6173	9.22727
1092	26.0164	12.8987	10.0019
1093	34.9434	10.8758	8.89948
1094	30.8714	17.9513	8.63408
1095	47.1031	13.3667	8.49305
1096	35.9492	14.0899	7.79243
1097	36.4405	13.1149	10.0831
1098	30.7577	18.9008	9.39376
1099	41.8248	14.4305	9.08944
1100	39.4488	17.0745	8.26312
1101	23.8287	12.243	9.44008
1102	37.9391	14.44	8.64989
1103	11.7142	15.5988	9.17666
1104	40.2571	15.9423	8.35716
1105	41.2094	17.3635	9.01808
1106	40.0977	17.2648	8.84684
1107	37.7641	24.1683	7.558
1108	17.1807	23.1454	8.64301
1109	46.9855	13.7885	10.1544
1110	16.1708	10.7611	8.22078
1111	38.8404	12.1085	10.0805
1112	19.2645	14.0612	8.63234
1113	48.4019	16.0505	8.62105
1114	38.1693	20.0009	7.94826
1115	40.1681	18.1771	9.49664
1116	50.4128	12.283	8.93433
1117	29.4834	14.2031	7.5299
1118	52.2387	23.7131	8.63284
1119	37.3365	15.7178	9.05121
1120	39.1278	12.315	8.89017
1121	25.2317	10.1574	8.88876
1122	20.2138	13.7551	8.77636
1123	33.58	14.3102	8.44591
1124	31.0447	15.7024	8.24615
1125	31.1602	16.5094	9.53179
1126	51.7015	14.6504	8.21853
1127	23.12	15.475	8.62795
1128	39.8601	16.7074	9.15333
1129	38.8417	17.3569	9.22215
1130	43.4178	10.3139	10.3091
1131	54.2439	15.9369	9.15503
1132	32.5977	14.4931	9.59634
1133	18.3883	14.1853	8.73034
1134	34.0454	22.8822	8.84251
1135	21.0159	16.0814	10.236
1136	28.2096	14.1926	7.90677
1137	33.3995	13.7065	9.42531
1138	36.1336	11.7912	7.46178
1139	31.3026	20.4754	8.29146
1140	36.6176	22.0882	9.97968
1141	30.6245	12.3652	7.43622
1142	42.1897	16.8718	9.00981
1143	20.2065	13.666	9.54529
1144	33.253	8.66836	9.89083
1145	51.2609	19.1311	8.84827
1146	41.9208	8.5301	9.2282
1147	22.5129	20.521	7.58414
1148	25.5478	14.3383	6.53839
1149	27.6923	18.88	8.35074
1150	23.1347	17.7946	8.08056
1151	35.4945	8.29271	9.97298
1152	46.8145	11.8928	9.97428
1153	16.7113	15.0828	9.9102
1154	40.3122	10.5488	8.15232
1155	20.3611	13.0622	8.51026
1156	20.3963	24.2101	7.67332
1157	24.8723	11.6048	9.91071
1158	45.0306	10.7177	9.38948
1159	26.3959	21.3899	8.15672
1160	28.0729	22.9272	8.32164
1161	14.5482	12.3553	9.79177
1162	28.4941	13.3524	8.44793
1163	27.3817	17.5774	7.61253
1164	49.7956	10.7443	8.09653
1165	34.237	21.6092	8.57002
1166	26.8657	11.097	8.65012
1167	41.8498	16.489	9.99397
1168	23.0829	15.4513	9.28275
1169	42.8813	21.3903	9.10109
1170	31.8275	14.8277	7.60545
1171	25.6992	19.085	8.50528
1172	40.8023	12.1835	9.67172
1173	14.3503	22.3285	7.33788
1174	37.197	17.0373	9.89274
1175	14.6551	19.8661	8.83304
1176	14.9352	17.0475	8.82205
1177	32.2457	16.5864	8.16318
1178	32.9337	19.3412	7.42739
1179	36.9504	11.2161	7.50656
1180	33.6758	20.5869	9.3273
1181	35.296	14.7493	9.78201
1182	30.8253	16.8667	8.94375
1183	43.7465	21.0959	9.10598
1184	22.2864	12.1528	8.7378
1185	43.0278	13.8354	9.7675
1186	45.2288	17.2419	6.84349
1187	38.2006	17.4742	8.22469
1188	34.9623	15.8117	9.75083
1189	27.9008	11.7558	7.79202
1190	43.6704	21.6305	8.77496
1191	23.7351	6.24773	7.77758
1192	44.162	18.5118	9.3422
1193	47.0294	17.0885	10.0807
1194	34.0881	17.6663	8.56759
1195	38.4697	19.9429	9.03713
1196	20.4795	27.2607	8.63629
1197	32.3359	11.6927	8.30162
1198	30.842	15.655	8.15056
1199	13.6614	24.7835	7.7469
1200	39.1244	13.5613	8.6806
1201	41.081	20.9334	8.61838
1202	35.1717	17.5156	8.865
1203	34.5118	11.7368	9.5371
1204	49.0119	21.5355	9.10211
1205	21.0477	14.3807	7.84741
1206	20.7482	16.9391	9.08346
1207	32.6322	6.69022	8.11335
1208	29.8887	13.8119	8.6767
1209	10.2278	24.0189	8.576
1210	17.262	11.6873	8.55487
1211	37.4801	11.9448	8.29167
1212	12.7847	15.4451	8.5053
1213	14.5768	13.8985	8.97142
1214	18.4378	26.1172	8.23978
1215	19.5433	15.0102	8.5912
1216	43.4722	12.951	8.36103
1217	14.5629	18.1245	8.19822
1218	47.7523	12.0947	8.23139
1219	42.0703	11.1017	9.32049
1220	49.9621	16.464	8.62413
1221	35.8506	16.1962	9.39839
1222	35.1199	9.09538	8.67778
1223	26.7121	8.73164	9.78723
1224	16.7305	12.9877	8.72822
1225	37.0648	16.2419	7.93933
1226	25.314	18.4421	8.1802
1227	33.2224	16.1674	9.3893
1228	25.2164	12.0691	8.11032
1229	37.085	19.7033	8.44304
1230	34.0896	8.0949	8.67534
1231	17.6018	16.9967	8.24085
1232	29.742	9.18295	9.213
1233	47.5952	20.0144	8.602
1234	43.8996	17.6067	8.52488
1235	36.1504	12.5197	8.92414
1236	31.6168	14.6882	9.49858
1237	46.4453	17.3398	8.67916
1238	60.9431	6.85331	8.62549
1239	43.2454	12.0662	8.8234
1240	41.7454	16.5748	8.79358
1241	22.0725	19.0964	10.7897
1242	22.7479	17.5705	9.58247
1243	20.9308	8.12036	8.68788
1244	32.8627	19.1041	9.37532
1245	32.1763	11.3409	9.15004
1246	27.3127	17.0713	9.34196
1247	41.7877	18.2683	8.52702
1248	39.0982	23.0962	8.85275
1249	23.2786	20.0973	9.79162
1250	38.9412	20.6545	8.71053
1251	26.4678	14.3515	9.20946
1252	27.5387	23.4052	9.56578
1253	49.4631	10.9731	10.0418
1254	27.6478	16.2854	8.93989
1255	12.4023	14.5071	8.63901
1256	38.8449	26.1185	9.60497
1257	28.0542	15.9952	7.48025
1258	19.6282	17.3152	8.81208
1259	31.0938	15.6534	8.1034
1260	51.3466	12.4434	9.11736
1261	50.6223	12.4266	9.43301
1262	49.6874	17.0279	9.95308
1263	40.6008	13.5415	7.29189
1264	24.309	20.2649	8.94184
1265	43.6535	15.9759	9.81986
1266	30.5373	16.6688	9.34078
1267	43.9924	10.5177	7.8906
1268	22.9014	16.8413	9.45392
1269	58.0252	8.68341	7.90518
1270	35.5409	10.3899	9.03787
1271	42.978	18.6665	7.75245
1272	33.5393	12.4173	8.7192
1273	21.7828	9.86737	8.36472
1274	59.6232	20.6154	7.83581
1275	14.5349	18.3809	9.39809
1276	24.9367	13.9377	7.46341
1277	28.6885	15.0672	8.37324
1278	36.0435	7.57651	8.77909
1279	48.0722	20.22	7.67322
1280	25.3296	15.5259	9.69681
1281	42.6668	19.3103	9.37177
1282	29.0107	20.3105	9.0569
1283	33.8124	18.0175	8.41709
1284	45.4725	13.6254	9.64439
1285	17.8856	24.5956	9.65811
1286	44.289	18.1345	9.23124
1287	58.6061	18.8967	8.37203
1288	22.9592	14.8627	8.31472
1289	36.019	11.9344	9.09514
1290	43.2684	17.1459	8.03265
1291	43.3459	17.3534	8.51113
1292	35.3988	12.1047	9.24604
1293	32.8084	15.3219	9.6066
1294	49.112	19.7556	9.36607
1295	23.1588	17.6428	9.27628
1296	41.8927	11.8603	9.11336
1297	40.5656	11.5338	9.92056
1298	43.4936	15.9115	8.25981
1299	41.9255	17.3328	8.15203
1300	61.8221	15.4037	9.253
1301	36.5944	10.4057	8.21506
1302	31.1824	11.472	9.20074
1303	43.6277	22.4326	9.53272
1304	28.8886	15.1157	9.06684
1305	20.3938	16.9726	8.68109
1306	32.3422	18.4806	9.34489
1307	25.0299	18.3372	8.30968
1308	31.7835	20.0862	8.20755
1309	56.9387	22.4799	8.69722
1310	28.1836	12.7447	9.02794
1311	18.3041	16.9042	9.67552
1312	32.2762	20.4721	9.16709
1313	40.3995	25.2252	8.19423
1314	9.79704	20.3582	8.7417
1315	33.0192	14.0104	8.96968
1316	24.225	19.0023	8.23686
1317	25.429	7.54831	8.97291
1318	38.5689	11.8904	8.56666
1319	57.0496	16.1458	8.93524
1320	36.1993	18.6945	8.25353
1321	44.552	9.38032	8.85623
1322	29.7897	14.1691	9.79813
1323	68.6038	14.1344	8.19777
1324	14.7168	26.605	8.69829
1325	22.5254	8.04923	9.11939
1326	37.4449	12.7615	9.6202
1327	10.9669	14.7948	8.7142
1328	44.9631	18.6856	8.62286
1329	28.4984	11.3853	8.10492
1330	21.3686	14.3317	8.59144
1331	34.3291	15.2471	8.73933
1332	23.0695	15.2613	10.1194
1333	24.8769	15.6928	9.77941
1334	34.7628	10.6284	10.498
1335	47.6564	15.4758	9.18799
1336	29.5375	7.21098	9.14803
1337	37.3971	13.7035	9.6963
1338	50.0064	18.0478	9.41599
1339	41.7091	20.1473	8.86568
1340	49.5857	19.4503	9.0715
1341	39.6926	24.4434	8.00929
1342	31.1759	12.5596	10.1829
1343	33.7314	16.5645	8.23365
1344	44.0787	21.7473	9.03558
1345	35.7177	17.9693	9.3485
1346	49.0789	13.823	8.86649
1347	13.1661	9.81866	7.61867
1348	46.395	19.9601	8.64334
1349	27.5192	6.11714	8.05777
1350	31.1698	17.0025	8.34505
1351	48.1079	23.7519	9.40518
1352	34.4116	10.7581	8.70462
1353	22.3551	17.1237	8.00483
1354	39.1506	16.329	7.21307
1355	27.2915	19.9345	9.03319
1356	37.4039	14.6177	9.28968
1357	23.6085	13.6906	8.48581
1358	20.8554	21.5456	9.3661
1359	32.8019	17.9861	8.73082
1360	33.7394	14.2489	9.59745
1361	34.1585	6.90238	9.81083
1362	23.8487	8.68163	10.3136
1363	33.6756	14.0614	9.78881
1364	34.6289	21.4086	8.25205
1365	30.7235	10.8547	7.51686
1366	13.9854	15.4286	8.8699
1367	23.253	10.5301	6.78548
1368	42.2984	12.2127	9.27662
1369	21.4634	21.9022	8.86836
1370	57.014	11.5733	8.86479
1371	36.4678	13.7301	9.1251
1372	40.7131	13.9428	7.8991
1373	31.9319	14.7361	8.82693
1374	27.4822	13.7416	9.13632
1375	21.547	16.9812	9.87096
1376	31.6064	17.3038	10.2901
1377	31.3199	15.8137	9.73535
1378	46.6536	7.73036	9.55469
1379	34.9232	13.9641	8.89902
1380	41.5781	18.7045	7.36956
1381	47.6172	21.2165	7.48328
1382	30.8439	14.0919	10.5478
1383	31.5668	15.1599	9.39069
1384	24.1829	19.6544	8.90588
1385	57.1094	14.9759	9.14904
1386	29.6137	17.8066	8.27629
1387	46.1497	13.2486	8.66592
1388	34.1119	20.5221	7.96354
1389	44.078	21.7887	7.52436
1390	38.632	11.2325	8.20761
1391	31.6399	25.7252	7.8748
1392	33.5339	17.5184	9.17614
1393	39.4581	14.0737	8.61816
1394	37.4588	17.7126	8.19476
1395	43.6539	20.4552	9.40675
1396	42.753	16.4972	8.2356
1397	64.6815	15.5515	9.16519
1398	34.9539	14.5572	8.55077
1399	13.6057	21.0383	8.65636
1400	34.2385	13.3801	7.5483
1401	22.9771	19.7457	7.26553
1402	29.4082	12.7759	9.29055
1403	43.2378	17.0506	9.35853
1404	33.5559	8.59203	8.8656
1405	27.8976	15.0797	9.31949
1406	59.9063	16.5401	9.40422
1407	32.5739	8.01846	7.92583
1408	28.2059	18.7209	9.47895
1409	20.9989	17.6413	9.33401
1410	41.0736	18.6502	9.30783
1411	51.6444	11.7296	8.87748
1412	25.3689	12.9395	8.03664
1413	19.2836	16.211	8.77661
1414	25.6223	9.6444	7.68214
1415	37.287	26.1913	8.72073
1416	29.6127	28.7115	8.67061
1417	41.1155	22.0003	8.00772
1418	39.8418	28.4843	7.75471
1419	23.9899	12.5988	8.91802
1420	18.2363	14.9684	10.0291
1421	28.681	15.6394	8.26351
1422	38.402	12.0679	9.83605
1423	49.7316	7.94682	9.70883
1424	40.4062	13.6469	8.86436
1425	36.6275	14.1077	8.27835
1426	35.4094	16.0757	9.15472
1427	25.4659	11.3473	8.15285
1428	33.4043	19.2376	9.27852
1429	15.4164	16.7132	9.07298
1430	48.5011	16.8516	9.62225
1431	26.8854	16.0279	8.9719
1432	43.5636	15.2198	7.9969
1433	23.4861	10.0919	8.95679
1434	14.9376	7.3278	7.45595
1435	35.004	11.4938	9.20149
1436	15.8862	18.8342	10.4169
1437	24.5756	9.17377	8.40079
1438	43.2925	18.8534	8.92101
1439	37.8026	17.6177	9.09118
1440	41.1727	19.5018	8.17566
1441	27.8335	14.0362	8.78977
1442	43.2599	18.7426	8.54371
1443	37.8536	11.5085	8.39435
1444	68.8754	12.5874	10.3746
1445	26.8054	12.2591	8.46551
1446	41.297	13.3713	8.26272
1447	21.3415	11.4045	9.24625
1448	25.4857	19.2552	8.84258
1449	13.0693	16.7112	10.3266
1450	27.2476	27.1017	8.16788
1451	54.0297	12.0713	9.1396
1452	48.3956	21.0516	8.87846
1453	43.2749	15.7721	8.25168
1454	27.2242	15.9343	9.29819
1455	37.3477	9.81552	8.15135
1456	36.1702	20.9626	8.21867
1457	34.0563	22.1569	8.16689
1458	34.8015	29.8251	8.4513
1459	39.7807	11.9134	8.95188
1460	17.6453	12.7655	8.35167
1461	32.0436	16.9765	8.69447
1462	36.2851	12.5878	7.55732
1463	41.0348	10.2287	8.85242
1464	51.3853	12.3637	8.44444
1465	24.0353	15.4505	8.23542
1466	43.6496	16.6505	9.32257
1467	26.6988	15.224	8.93994
1468	27.8569	15.4144	8.74312
1469	44.4104	29.6096	7.74733
1470	43.3143	17.5392	7.98476
1471	15.0146	8.1088	9.32205
1472	39.0379	12.2652	8.21144
1473	29.4184	22.571	9.0099
1474	56.1059	17.6026	8.43504
1475	40.2348	11.6557	8.89211
1476	31.0895	16.2959	8.86451
1477	26.6288	14.1915	8.79398
1478	31.7779	18.8009	8.80774
1479	34.7663	13.9022	11.0305
1480	51.0895	22.2642	8.21154
1481	36.4143	22.6932	9.55283
1482	13.899	18.1624	7.53442
1483	30.9427	25.4497	8.22635
1484	40.6931	24.9559	8.84598
1485	14.9998	12.4649	9.21256
1486	44.6398	20.6662	9.08817
1487	23.9992	17.1755	10.17
1488	21.5993	16.6885	10.7733
1489	30.2741	17.7376	9.6862
1490	37.4634	12.8833	9.44659
1491	27.7884	13.48	9.08869
1492	37.9473	11.348	9.05794
1493	20.3076	13.8961	10.1041
1494	43.9724	10.7796	9.00636
1495	31.4596	10.4687	8.66914
1496	31.8659	11.8624	8.03162
1497	32.4532	13.9118	9.05768
1498	35.3183	15.546	9.14187
1499	36.9691	9.17833	9.19526
1500	14.4365	17.8819	8.72182
1501	25.4409	11.7467	7.59942
1502	18.6673	14.5748	9.00255
1503	25.5667	18.2671	8.36919
1504	51.1697	17.1231	8.66977
1505	39.0119	14.885	8.28208
1506	36.0757	15.7092	8.36937
1507	12.4001	16.452	9.22936
1508	31.2608	17.8641	9.07137
1509	37.6007	16.4677	8.98494
1510	60.8891	17.2076	8.9222
1511	51.179	13.1307	9.6721
1512	39.0462	13.2779	8.20591
1513	30.7117	17.077	8.30483
1514	28.8752	15.1056	8.60696
1515	28.4709	13.4551	8.02232
1516	35.9969	12.326	8.44604
1517	22.0758	22.4223	8.59319
1518	34.2659	20.3411	7.70245
1519	32.3224	10.9217	9.20533
1520	34.1127	14.7032	8.93275
1521	40.2356	23.2947	9.43401
1522	36.5222	14.4705	9.38364
1523	59.2328	13.061	9.2925
1524	43.0003	9.48024	9.2335
1525	35.4715	13.4943	9.39281
1526	21.1382	10.6306	8.57072
1527	34.8706	14.2407	10.4363
1528	25.0611	10.224	8.93341
1529	50.8803	10.5667	8.26588
1530	44.8253	15.6654	8.72938
1531	33.5939	17.6427	8.66125
1532	41.8633	17.3356	8.0037
1533	32.9911	15.6246	7.0721
1534	36.9828	16.8554	9.09761
1535	23.1485	17.3632	8.28991
1536	42.1989	22.3332	7.92052
1537	43.9846	13.7322	8.90904
1538	36.1779	17.8934	8.0315
1539	22.3457	25.6112	7.98952
1540	22.0459	14.9997	8.78245
1541	40.192	14.7839	9.21951
1542	36.945	20.9556	8.87637
1543	48.6906	17.9665	9.28329
1544	47.8457	12.8308	8.74641
1545	23.0151	17.9215	9.69221
1546	49.9929	10.9019	9.41188
1547	38.8031	16.4584	8.53849
1548	12.3783	17.6059	9.20724
1549	49.3139	18.91	8.57425
1550	17.9911	16.6171	9.04497
1551	33.9656	20.2904	10.7225
1552	33.0975	23.6461	9.1318
1553	26.964	18.9659	10.7007
1554	16.4718	20.2023	10.9358
1555	39.0531	10.038	8.92379
1556	33.2455	17.1522	8.49044
1557	52.224	14.1479	9.88284
1558	42.3891	21.1236	10.0731
1559	28.4194	15.5953	8.48694
1560	19.7693	17.9591	7.89262
1561	32.6577	9.61308	9.47806
1562	40.394	25.6743	9.04496
1563	23.4281	9.73322	9.28796
1564	10.6319	13.1777	10.9433
1565	32.7135	19.9146	8.04216
1566	45.0963	22.7861	8.87962
1567	44.6082	17.1425	8.42627
1568	36.0351	16.4594	7.30869
1569	35.9563	17.4186	9.69981
1570	42.0562	16.4064	8.14048
1571	13.2563	14.0516	9.7848
1572	20.0669	18.9293	9.76621
1573	29.621	21.2539	8.29698
1574	24.9471	14.8822	9.4668
1575	25.7639	13.2138	8.28997
1576	31.5905	16.4905	10.0608
1577	33.245	14.2266	9.77263
1578	37.0672	20.2939	8.68976
1579	34.9122	16.4385	8.97799
1580	38.4053	19.1311	8.42974
1581	28.1188	7.75875	8.37898
1582	21.6549	8.92715	8.12969
1583	42.3655	10.6705	9.31619
1584	28.8964	9.15811	8.36419
1585	34.7581	17.5587	8.18994
1586	41.1391	20.1141	9.46904
1587	46.2676	18.0169	8.47733
1588	35.5111	12.0741	7.68779
1589	26.5183	23.5426	9.26722
1590	40.0904	8.49743	8.83384
1591	31.5624	20.6101	8.13524
1592	40.0023	13.7955	9.18901
1593	21.3894	20.2861	8.34446
1594	26.0421	19.8975	10.0916
1595	36.2587	16.3771	8.13435
1596	21.3796	16.8883	7.9391
1597	48.6055	6.08965	9.98878
1598	30.4819	17.1351	9.01363
1599	25.0024	18.8269	8.11174
1600	24.3698	7.26742	9.29009
1601	23.0908	18.276	8.19535
1602	26.0954	20.5883	8.25457
1603	22.0457	13.3706	8.25707
1604	37.7997	16.9382	10.2805
1605	26.3681	19.5616	9.16142
1606	30.4052	15.9615	9.26916
1607	46.1275	11.726	7.92189
1608	18.946	17.8526	8.36124
1609	35.4203	7.24969	8.37408
1610	33.2751	12.6865	8.10487
1611	30.3284	21.6816	7.59833
1612	44.4423	16.0263	8.22925
1613	36.8569	16.406	8.40088
1614	34.4062	9.58396	8.30163
1615	21.2622	17.6055	9.84302
1616	26.3198	25.5181	9.3124
1617	58.3867	14.2244	9.3605
1618	20.1894	7.82258	7.32883
1619	38.0786	12.6706	8.60881
1620	43.9282	11.379	9.85579
1621	38.1682	15.8126	9.69679
1622	30.395	19.9473	8.94873
1623	26.738	21.3825	8.89051
1624	47.5829	11.2477	9.29134
1625	35.4164	15.3348	9.31357
1626	28.2782	11.9121	9.14817
1627	55.2795	14.9803	8.92319
1628	36.566	16.0866	9.87657
1629	45.1971	19.5345	9.76176
1630	24.5257	12.581	7.96441
1631	35.9315	15.1933	9.39259
1632	45.034	19.4805	9.71601
1633	33.3846	9.18148	8.3998
1634	20.8818	23.1461	8.6608
1635	28.974	9.63439	10.1489
1636	43.3256	10.4661	7.24632
1637	32.9799	18.1577	8.58991
1638	37.5235	19.3569	8.7899
1639	18.2059	18.6421	7.74607
1640	9.34994	16.9729	10.6944
1641	56.4666	16.9386	7.9168
1642	44.9932	17.3699	8.11775
1643	55.7348	21.0531	9.82452
1644	34.7197	18.5953	8.44316
1645	40.0533	10.4719	8.05826
1646	39.8224	20.5763	9.77458
1647	33.3685	9.10337	9.94395
1648	30.8813	10.0977	7.75591
1649	33.996	11.7521	8.5683
1650	35.3316	16.8383	8.92522
1651	36.1635	13.2768	8.64159
1652	26.5783	14.9902	7.82354
1653	23.7827	19.1738	8.93498
1654	48.3565	15.7266	9.23015
1655	27.548	15.5242	9.29862
1656	28.7437	19.493	7.87073
1657	38.4603	15.9669	8.74534
1658	34.296	15.6666	11.0647
1659	29.1668	13.3801	7.8519
1660	34.6007	8.92098	8.58351
1661	29.5392	18.2001	10.0726
1662	38.5087	22.6028	9.52812
1663	25.746	12.2762	8.36664
1664	52.1377	18.1224	8.79688
1665	39.3918	14.2706	8.94241
1666	39.8055	22.2019	8.36071
1667	31.8524	19.6346	9.38792
1668	33.5067	18.2156	8.56908
1669	19.4	19.5299	8.18988
1670	46.2162	24.5967	8.31691
1671	44.9101	12.3922	8.20927
1672	41.9946	20.9072	9.02016
1673	56.3888	10.0903	7.94963
1674	28.1339	20.0407	10.1845
1675	35.989	10.9558	9.65302
1676	29.5232	12.4039	10.3888
1677	23.9085	12.6084	8.16353
1678	30.0081	16.782	8.91559
1679	48.3846	17.5229	9.02022
1680	19.4225	20.6211	8.38517
1681	35.0246	10.8335	8.5131
1682	23.8637	9.48598	7.02153
1683	34.2137	17.427	9.99588
1684	47.6355	19.111	8.48877
1685	41.9464	9.81023	8.48032
1686	32.1713	14.834	8.5829
1687	54.9155	13.7996	8.66463
1688	35.5356	12.4208	8.41362
1689	35.1809	15.5821	9.19574
1690	31.8954	22.8852	8.04147
1691	33.3321	9.01979	8.2169
1692	25.3131	12.2158	9.7963
1693	39.7036	6.36112	8.52507
1694	25.6085	23.3511	9.61208
1695	29.4601	26.0865	9.09991
1696	20.08	20.8823	9.45487
1697	26.4414	14.5893	9.54878
1698	34.79	15.2478	9.31132
1699	21.5043	6.64197	7.91351
1700	40.3298	18.0467	7.25021
1701	26.4317	11.9585	9.41058
1702	30.4991	16.6856	7.99168
1703	31.4556	16.2039	8.017
1704	35.3087	11.9436	8.29942
1705	17.7425	14.2395	8.62025
1706	46.4279	9.01766	10.6325
1707	30.3585	18.742	8.23515
1708	33.1343	14.9391	8.33329
1709	45.078	14.52	8.69587
1710	23.637	17.4926	8.84438
1711	40.6253	17.7254	8.21812
1712	50.8997	15.1695	9.22184
1713	40.9936	18.9727	10.0118
1714	36.6613	12.7816	9.40247
1715	30.9532	6.79751	9.74721
1716	33.0472	21.3313	7.727
1717	30.7668	13.4679	8.94308
1718	38.5282	7.83037	8.42949
1719	15.2223	11.918	9.23926
1720	38.1062	11.4748	8.7636
1721	22.8064	21.2075	10.7304
1722	40.0704	17.1586	7.73541
1723	45.6738	10.0894	9.21897
1724	28.8188	25.4218	8.56493
1725	28.7272	16.5961	7.83226
1726	36.6788	11.1578	9.09839
1727	30.891	15.8213	8.2115
1728	30.8133	19.0341	9.37324
1729	35.177	13.7535	8.31271
1730	36.7935	15.5112	8.62855
1731	38.9144	19.0429	9.6731
1732	45.9458	18.127	9.09446
1733	37.6225	18.2223	10.3755
1734	36.7488	17.582	7.90491
1735	36.0019	18.2176	9.65983
1736	22.8084	18.5432	8.97295
1737	33.3911	22.4092	9.45586
1738	33.7162	17.802	9.29974
1739	31.2602	20.2384	8.60802
1740	37.5211	23.7035	9.27918
1741	29.4378	11.3895	8.4846
1742	46.1966	15.1413	8.76669
1743	42.4457	18.5541	8.58112
1744	31.0251	12.2325	10.13
1745	27.8984	11.067	9.07973
1746	50.2004	8.72073	7.38393
1747	40.9307	18.5607	8.82985
1748	30.0084	6.3109	8.3954
1749	55.4817	21.2382	9.68216
1750	38.727	12.0425	8.18943
1751	18.9995	20.5311	8.6814
1752	34.4077	15.9949	8.89627
1753	35.9498	18.5282	7.95746
1754	27.7797	17.4159	7.21196
1755	52.7015	12.3829	8.82868
1756	16.6756	13.1509	7.7179
1757	40.4305	15.6653	9.65039
1758	46.8852	24.501	10.1289
1759	23.2454	12.3381	8.59223
1760	36.0275	7.35534	9.20188
1761	18.238	16.01	8.37739
1762	47.458	23.5963	9.22747
1763	35.6087	20.9832	9.211
1764	37.6773	16.4685	9.1877
1765	8.92421	18.5834	8.59163
1766	22.9788	11.305	9.34131
1767	19.0238	7.5152	9.41629
1768	32.0904	18.4844	8.37265
1769	42.7378	15.8657	8.67641
1770	37.3636	18.5229	9.92769
1771	40.0118	15.3018	8.41919
1772	24.9556	12.7298	9.78617
1773	12.1366	12.5151	9.27
1774	12.4054	14.2359	8.26315
1775	46.388	16.4577	6.7584
1776	43.7534	18.1795	8.18819
1777	37.5605	16.6607	7.95961
1778	40.8101	22.8766	7.9838
1779	29.2154	20.3333	9.04576
1780	29.1643	13.1966	8.81284
1781	29.0217	15.4785	8.22182
1782	47.1198	9.83108	9.02274
1783	26.2674	16.419	9.46091
1784	38.602	19.8166	9.46369
1785	32.9663	19.8268	8.073
1786	37.9359	17.073	8.91969
1787	36.9781	16.7265	7.79575
1788	33.4904	10.0633	8.69036
1789	44.5781	18.3517	8.12738
1790	22.4966	11.4927	8.65305
1791	23.964	11.5775	8.01939
1792	35.6493	21.0218	9.64141
1793	17.9517	11.1572	8.06272
1794	18.0933	16.5227	8.75758
1795	15.4454	12.814	9.09252
1796	36.2505	17.1898	7.12284
1797	29.1577	14.9871	8.92029
1798	45.3229	12.9747	8.71075
1799	28.2319	17.123	7.84843
1800	43.3633	6.86251	8.31705
1801	20.9311	13.6552	9.83227
1802	32.5916	11.6241	8.45117
1803	38.1926	15.1173	9.29061
1804	27.6362	11.2526	9.55365
1805	18.0639	9.46756	8.88575
1806	38.7252	6.84865	7.83145
1807	24.2573	23.0102	9.25368
1808	40.5383	14.5331	8.11625
1809	38.5064	12.6115	10.264
1810	27.8787	9.93639	9.37809
1811	22.6816	19.7374	8.97259
1812	33.2434	21.543	8.21349
1813	41.0735	11.8618	8.42462
1814	34.8123	15.2584	8.09973
1815	26.8291	13.8755	8.04696
1816	56.7679	15.6231	9.57823
1817	27.9943	22.4794	9.25888
1818	25.1265	13.927	8.81132
1819	17.399	13.5908	9.4323
1820	18.9842	20.1434	9.02922
1821	31.404	9.72773	8.70443
1822	23.063	23.1012	8.0366
1823	35.7659	11.4971	9.71658
1824	36.5782	18.0099	8.99195
1825	34.5847	13.6205	9.34049
1826	48.6781	13.8425	9.33484
1827	18.3025	14.8648	8.92315
1828	17.1143	17.1034	8.99782
1829	48.4116	19.0323	8.70299
1830	36.6706	19.7976	8.75948
1831	28.4419	13.9391	9.14991
1832	43.9904	19.2115	8.95572
1833	30.5482	20.8116	8.47072
1834	23.0594	12.6925	8.85937
1835	41.8067	21.5142	7.68341
1836	28.3848	8.44619	8.41621
1837	28.9543	14.8761	8.10816
1838	40.5552	23.3171	7.20772
1839	28.7486	20.686	7.38922
1840	36.4703	14.7484	8.36769
1841	48.2036	22.2421	9.44265
1842	28.7027	15.9955	10.2782
1843	19.7823	13.4995	7.4858
1844	23.9575	16.2811	9.90825
1845	34.8469	14.4851	9.32984
1846	25.9393	17.1575	8.96515
1847	27.5039	18.5905	7.67297
1848	39.1239	17.3973	8.47001
1849	24.8623	19.7038	8.57675
1850	61.0965	22.6342	9.0541
1851	24.698	27.857	9.21223
1852	27.3713	17.522	8.97731
1853	27.774	17.9789	7.70956
1854	37.009	17.8995	8.32675
1855	30.0479	8.99169	8.85237
1856	31.6217	11.7418	9.54254
1857	40.0699	17.4389	8.31372
1858	38.4219	15.9331	8.91804
1859	43.3088	15.703	9.19253
1860	25.3318	16.7419	10.9801
1861	46.6829	22.4203	9.66562
1862	24.8767	14.7547	7.15189
1863	39.9243	17.7592	8.34475
1864	56.2297	17.1729	9.20164
1865	21.2828	22.3865	8.63617
1866	41.8694	11.6018	7.89977
1867	32.122	21.0353	8.1805
1868	33.935	12.7679	9.02305
1869	37.7781	16.4329	7.91151
1870	23.6619	20.5804	8.55449
1871	37.7534	11.0073	8.78805
1872	17.0305	9.52849	8.5999
1873	28.2276	13.6678	8.42846
1874	49.4447	14.994	9.73757
1875	52.445	12.773	9.29085
1876	28.2477	10.1527	9.45026
1877	29.3808	10.3193	10.43
1878	33.3494	17.8181	8.08582
1879	48.465	19.879	8.92916
1880	20.0941	17.528	7.74017
1881	34.4379	13.4398	10.0682
1882	38.8794	16.252	9.97198
1883	23.8113	24.9412	9.96658
1884	24.3403	15.2795	8.12428
1885	30.5481	26.2816	9.91716
1886	34.452	15.0047	9.28103
1887	22.4281	19.1483	8.07005
1888	30.9844	30.2251	9.89403
1889	48.1931	21.0636	9.04558
1890	19.1651	16.5601	8.93886
1891	39.2966	19.2749	10.4244
1892	21.1866	23.8273	8.52506
1893	31.9956	17.3692	6.9091
1894	37.0892	17.8503	9.98938
1895	25.5813	22.3797	7.70272
1896	19.3209	10.7519	8.42278
1897	45.2818	13.6282	9.77547
1898	45.8738	21.988	7.80906
1899	10.2175	16.8889	9.07898
1900	28.7096	14.7473	8.448
1901	65.9303	9.75602	9.27685
1902	40.4072	6.71726	8.7021
1903	39.8056	8.88547	8.62443
1904	29.8124	9.65101	9.22423
1905	29.3473	12.2543	9.00143
1906	19.1998	19.1897	8.54056
1907	21.739	29.8217	9.27525
1908	41.9136	14.3811	10.0962
1909	48.1625	13.8603	8.94208
1910	51.9124	17.4523	7.98
1911	29.9961	14.3058	7.78892
1912	46.4258	13.2842	8.41035
1913	31.8999	21.8047	8.22635
1914	41.4239	18.3536	8.22965
1915	57.9252	17.3413	9.16728
1916	40.3786	16.8815	8.94225
1917	43.4829	22.3806	8.6924
1918	13.5266	20.4826	9.20739
1919	38.6278	23.6706	8.62538
1920	29.3931	11.3656	8.52901
1921	41.3099	24.2903	8.75106
1922	25.8182	10.3006	7.52462
1923	52.4505	21.3108	10.3526
1924	24.8171	15.7737	8.44555
1925	39.6701	14.2068	8.20142
1926	45.3445	15.3559	7.74644
1927	28.1238	12.6156	8.69046
1928	55.904	16.366	9.4617
1929	11.4214	18.9982	9.33629
1930	42.5542	17.7256	8.24176
1931	30.5994	11.9519	9.22053
1932	33.7277	18.7626	9.32532
1933	30.9072	18.8047	8.20794
1934	50.6267	15.0618	10.2849
1935	37.7833	17.1793	9.02825
1936	27.5485	18.3604	8.86602
1937	50.9441	18.0262	7.73815
1938	49.683	17.391	7.70732
1939	40.2142	31.662	9.10541
1940	38.9432	13.7171	7.40759
1941	21.8801	18.248	10.0353
1942	27.7318	14.0187	8.36315
1943	44.9355	11.4632	8.13277
1944	36.3937	19.9382	9.07511
1945	46.3835	17.0498	9.0914
1946	40.3836	12.5929	9.33821
1947	38.7814	16.7212	10.2996
1948	44.791	22.1399	8.96417
1949	20.3611	15.2681	8.15554
1950	35.9085	25.4587	8.77885
1951	34.5337	18.4244	8.32333
1952	39.8793	23.6009	8.41233
1953	25.7354	7.70704	8.67703
1954	41.7794	15.1732	9.09743
1955	55.1053	13.2099	8.93528
1956	33.6799	12.2756	8.49652
1957	27.3623	10.8487	7.87323
1958	33.1785	20.093	9.33031
1959	39.893	17.5257	8.83416
1960	28.187	16.9083	8.87667
1961	32.0462	11.4083	8.31796
1962	17.2334	18.3095	9.73986
1963	38.2201	15.5483	9.32921
1964	19.7254	14.3808	8.68202
1965	41.6893	21.2581	9.39822
1966	25.9547	17.8886	8.39475
1967	28.6332	18.1771	8.27347
1968	65.4358	14.6645	10.028
1969	23.811	15.1884	8.51308
1970	32.931	9.71985	8.63165
1971	37.8533	17.4807	9.49548
1972	31.6656	13.3644	9.21873
1973	42.6544	14.9392	9.16523
1974	36.1031	15.308	9.13452
1975	32.3327	12.3503	9.65582
1976	38.0963	12.1191	9.88383
1977	12.4746	19.4818	8.03524
1978	27.286	20.0043	7.38373
1979	42.5067	17.5349	7.06568
1980	40.2751	12.8284	9.31772
1981	30.6855	23.5498	9.20931
1982	28.4	14.6599	10.0199
1983	41.3542	13.8138	9.99352
1984	40.3762	16.9995	8.5933
1985	24.516	10.5234	7.88284
1986	15.0953	9.7894	10.9069
1987	14.7294	21.6888	9.32138
1988	36.3174	21.9406	8.93947
1989	23.9046	13.6632	9.39252
1990	51.0416	14.6729	9.34906
1991	29.7896	21.4767	9.21573
1992	39.3419	15.3066	7.56054
1993	10.8962	18.3467	9.15357
1994	43.6904	20.858	9.82835
1995	20.0763	19.4976	8.43187
1996	40.0123	17.8185	8.50214
1997	21.2857	12.095	8.76577
1998	28.2862	15.4079	8.9907
1999	28.1556	12.5323	8.97598
[truncated: 8,001 more rows]

## Sheet: Simulation Output Values 1
Sim #	ADD	ADD_carc	CR	HQ
1	2.98765e-09	3.60974e-10	3.00811e-11	0.000199177
2	3.21904e-09	3.88931e-10	3.24109e-11	0.000214603
3	6.16863e-09	7.45305e-10	6.21088e-11	0.000411242
4	5.84497e-09	7.06201e-10	5.88501e-11	0.000389665
5	6.39436e-09	7.72579e-10	6.43816e-11	0.000426291
6	4.39592e-09	5.31123e-10	4.42602e-11	0.000293061
7	4.48653e-09	5.42071e-10	4.51726e-11	0.000299102
8	1.01401e-09	1.22515e-10	1.02096e-11	6.7601e-05
9	4.88671e-09	5.90421e-10	4.92018e-11	0.00032578
10	4.6234e-09	5.58609e-10	4.65507e-11	0.000308227
11	4.85289e-09	5.86336e-10	4.88613e-11	0.000323526
12	4.54411e-09	5.49028e-10	4.57523e-11	0.000302941
13	2.50203e-09	3.023e-10	2.51917e-11	0.000166802
14	3.04936e-09	3.68429e-10	3.07024e-11	0.000203291
15	3.36992e-09	4.0716e-10	3.393e-11	0.000224661
16	4.13401e-09	4.99479e-10	4.16233e-11	0.000275601
17	3.00995e-09	3.63668e-10	3.03057e-11	0.000200663
18	3.96107e-09	4.78584e-10	3.9882e-11	0.000264071
19	1.4366e-08	1.73573e-09	1.44644e-10	0.000957733
20	3.62318e-09	4.37759e-10	3.648e-11	0.000241545
21	5.14888e-09	6.22097e-10	5.18414e-11	0.000343258
22	3.27114e-09	3.95225e-10	3.29354e-11	0.000218076
23	1.56771e-09	1.89413e-10	1.57845e-11	0.000104514
24	3.93785e-09	4.75778e-10	3.96482e-11	0.000262523
25	1.7171e-08	2.07463e-09	1.72886e-10	0.00114473
26	3.7431e-09	4.52248e-10	3.76874e-11	0.00024954
27	4.41689e-09	5.33657e-10	4.44714e-11	0.000294459
28	2.03038e-09	2.45314e-10	2.04428e-11	0.000135358
29	6.53473e-09	7.89538e-10	6.57949e-11	0.000435649
30	3.77438e-09	4.56028e-10	3.80024e-11	0.000251626
31	3.81104e-09	4.60458e-10	3.83715e-11	0.00025407
32	2.47424e-09	2.98942e-10	2.49119e-11	0.000164949
33	5.79155e-09	6.99746e-10	5.83121e-11	0.000386103
34	3.39814e-09	4.10569e-10	3.42141e-11	0.000226542
35	3.17109e-09	3.83137e-10	3.1928e-11	0.000211406
36	4.76586e-09	5.75821e-10	4.7985e-11	0.000317724
37	3.05e-09	3.68507e-10	3.07089e-11	0.000203333
38	4.77747e-09	5.77223e-10	4.81019e-11	0.000318498
39	2.86336e-09	3.45957e-10	2.88298e-11	0.000190891
40	5.89995e-09	7.12843e-10	5.94036e-11	0.00039333
41	4.19041e-09	5.06294e-10	4.21912e-11	0.000279361
42	4.96628e-09	6.00036e-10	5.0003e-11	0.000331086
43	1.72003e-09	2.07817e-10	1.73181e-11	0.000114668
44	2.99896e-09	3.6234e-10	3.0195e-11	0.000199931
45	4.272e-09	5.16152e-10	4.30126e-11	0.0002848
46	5.29431e-09	6.39668e-10	5.33057e-11	0.000352954
47	4.50802e-09	5.44668e-10	4.5389e-11	0.000300535
48	3.93276e-09	4.75163e-10	3.95969e-11	0.000262184
49	2.98726e-09	3.60927e-10	3.00772e-11	0.000199151
50	2.74463e-09	3.31611e-10	2.76342e-11	0.000182975
51	4.73259e-09	5.71801e-10	4.765e-11	0.000315506
52	2.96856e-09	3.58667e-10	2.98889e-11	0.000197904
53	4.2308e-09	5.11173e-10	4.25978e-11	0.000282053
54	1.57324e-09	1.90082e-10	1.58402e-11	0.000104883
55	3.41614e-09	4.12745e-10	3.43954e-11	0.000227743
56	2.06209e-09	2.49146e-10	2.07622e-11	0.000137473
57	2.67822e-09	3.23588e-10	2.69657e-11	0.000178548
58	3.18811e-09	3.85194e-10	3.20995e-11	0.000212541
59	3.32129e-09	4.01285e-10	3.34404e-11	0.00022142
60	3.99937e-09	4.83211e-10	4.02676e-11	0.000266624
61	4.27074e-09	5.15999e-10	4.29999e-11	0.000284716
62	7.56673e-09	9.14226e-10	7.61855e-11	0.000504448
63	4.71878e-09	5.70133e-10	4.7511e-11	0.000314586
64	3.45573e-09	4.17528e-10	3.4794e-11	0.000230382
65	5.76754e-09	6.96845e-10	5.80704e-11	0.000384503
66	3.595e-09	4.34354e-10	3.61962e-11	0.000239666
67	4.37683e-09	5.28817e-10	4.40681e-11	0.000291789
68	2.5856e-09	3.12397e-10	2.60331e-11	0.000172373
69	4.05326e-09	4.89723e-10	4.08102e-11	0.000270218
70	3.93273e-09	4.7516e-10	3.95966e-11	0.000262182
71	6.34711e-09	7.66869e-10	6.39058e-11	0.00042314
72	1.88571e-09	2.27835e-10	1.89862e-11	0.000125714
73	3.57673e-09	4.32148e-10	3.60123e-11	0.000238449
74	1.10023e-08	1.32932e-09	1.10777e-10	0.00073349
75	5.41991e-09	6.54845e-10	5.45704e-11	0.000361328
76	3.3294e-09	4.02264e-10	3.3522e-11	0.00022196
77	8.21095e-09	9.92062e-10	8.26719e-11	0.000547396
78	5.16546e-09	6.24101e-10	5.20084e-11	0.000344364
79	6.29211e-09	7.60225e-10	6.3352e-11	0.000419474
80	4.48746e-09	5.42183e-10	4.5182e-11	0.000299164
81	3.0536e-09	3.68942e-10	3.07451e-11	0.000203573
82	3.57999e-09	4.32541e-10	3.60451e-11	0.000238666
83	3.58659e-09	4.33339e-10	3.61116e-11	0.000239106
84	3.9376e-09	4.75749e-10	3.96457e-11	0.000262507
85	3.4049e-09	4.11386e-10	3.42822e-11	0.000226993
86	7.58749e-09	9.16735e-10	7.63946e-11	0.000505832
87	3.46808e-09	4.1902e-10	3.49183e-11	0.000231205
88	6.13242e-09	7.40931e-10	6.17443e-11	0.000408828
89	6.53765e-09	7.89891e-10	6.58243e-11	0.000435843
90	1.97889e-09	2.39094e-10	1.99245e-11	0.000131926
91	3.00711e-09	3.63324e-10	3.0277e-11	0.000200474
92	2.44975e-09	2.95984e-10	2.46653e-11	0.000163317
93	8.36299e-09	1.01043e-09	8.42027e-11	0.000557532
94	1.475e-09	1.78213e-10	1.48511e-11	9.83336e-05
95	4.98187e-09	6.01919e-10	5.01599e-11	0.000332125
96	4.24953e-09	5.13436e-10	4.27863e-11	0.000283302
97	3.03727e-09	3.66969e-10	3.05807e-11	0.000202485
98	1.70417e-09	2.05901e-10	1.71584e-11	0.000113611
99	5.22736e-09	6.3158e-10	5.26317e-11	0.000348491
100	6.18775e-09	7.47616e-10	6.23013e-11	0.000412517
101	7.19882e-09	8.69776e-10	7.24813e-11	0.000479922
102	7.27803e-09	8.79345e-10	7.32788e-11	0.000485202
103	4.1514e-09	5.0158e-10	4.17983e-11	0.00027676
104	4.48651e-09	5.42069e-10	4.51724e-11	0.000299101
105	4.94098e-09	5.96979e-10	4.97482e-11	0.000329399
106	3.68688e-09	4.45456e-10	3.71213e-11	0.000245792
107	5.18203e-09	6.26103e-10	5.21752e-11	0.000345469
108	1.9904e-09	2.40485e-10	2.00404e-11	0.000132694
109	4.48468e-09	5.41847e-10	4.51539e-11	0.000298978
110	5.42492e-09	6.55449e-10	5.46207e-11	0.000361661
111	2.68522e-09	3.24433e-10	2.70361e-11	0.000179015
112	3.99794e-09	4.83038e-10	4.02532e-11	0.000266529
113	6.56048e-09	7.92649e-10	6.60541e-11	0.000437365
114	2.10783e-09	2.54672e-10	2.12227e-11	0.000140522
115	5.09618e-09	6.1573e-10	5.13108e-11	0.000339745
116	2.61659e-09	3.16141e-10	2.63451e-11	0.000174439
117	3.71237e-09	4.48536e-10	3.7378e-11	0.000247491
118	1.89728e-09	2.29233e-10	1.91028e-11	0.000126485
119	4.03142e-09	4.87084e-10	4.05904e-11	0.000268762
120	4.88829e-09	5.90613e-10	4.92177e-11	0.000325886
121	3.52644e-09	4.26072e-10	3.5506e-11	0.000235096
122	1.44733e-09	1.74869e-10	1.45724e-11	9.64885e-05
123	2.62505e-09	3.17164e-10	2.64303e-11	0.000175003
124	2.02288e-09	2.44408e-10	2.03673e-11	0.000134859
125	3.93701e-09	4.75678e-10	3.96398e-11	0.000262468
126	3.04891e-09	3.68376e-10	3.0698e-11	0.000203261
127	4.11403e-09	4.97064e-10	4.1422e-11	0.000274268
128	2.93111e-09	3.54142e-10	2.95118e-11	0.000195407
129	4.20409e-09	5.07947e-10	4.23289e-11	0.000280273
130	5.01251e-09	6.05622e-10	5.04685e-11	0.000334168
131	2.73506e-09	3.30456e-10	2.7538e-11	0.000182338
132	4.75253e-09	5.74209e-10	4.78508e-11	0.000316835
133	5.06731e-09	6.12242e-10	5.10202e-11	0.000337821
134	2.43488e-09	2.94187e-10	2.45155e-11	0.000162325
135	4.26459e-09	5.15256e-10	4.2938e-11	0.000284306
136	6.79746e-09	8.21282e-10	6.84402e-11	0.000453164
137	2.51256e-09	3.03573e-10	2.52977e-11	0.000167504
138	3.86802e-09	4.67342e-10	3.89451e-11	0.000257868
139	4.80876e-09	5.81003e-10	4.84169e-11	0.000320584
140	5.0299e-09	6.07723e-10	5.06436e-11	0.000335327
141	2.5893e-09	3.12844e-10	2.60703e-11	0.00017262
142	1.70803e-09	2.06367e-10	1.71973e-11	0.000113869
143	2.83341e-09	3.42339e-10	2.85282e-11	0.000188894
144	3.40049e-09	4.10854e-10	3.42378e-11	0.000226699
145	2.31787e-09	2.8005e-10	2.33375e-11	0.000154525
146	4.75447e-09	5.74445e-10	4.78704e-11	0.000316965
147	1.19578e-08	1.44477e-09	1.20397e-10	0.000797188
148	2.93733e-09	3.54894e-10	2.95745e-11	0.000195822
149	3.8109e-09	4.6044e-10	3.837e-11	0.00025406
150	3.28829e-09	3.97297e-10	3.31081e-11	0.000219219
151	3.56857e-09	4.31162e-10	3.59302e-11	0.000237905
152	4.72558e-09	5.70953e-10	4.75794e-11	0.000315038
153	2.65772e-09	3.2111e-10	2.67592e-11	0.000177181
154	3.08215e-09	3.72391e-10	3.10326e-11	0.000205477
155	2.21776e-09	2.67954e-10	2.23295e-11	0.000147851
156	3.87849e-09	4.68606e-10	3.90505e-11	0.000258566
157	7.35745e-09	8.88942e-10	7.40785e-11	0.000490497
158	1.24629e-08	1.50579e-09	1.25482e-10	0.000830859
159	3.52427e-09	4.25809e-10	3.54841e-11	0.000234951
160	2.55876e-09	3.09154e-10	2.57628e-11	0.000170584
161	4.27823e-09	5.16904e-10	4.30753e-11	0.000285215
162	4.50728e-09	5.44578e-10	4.53815e-11	0.000300485
163	8.053e-09	9.72979e-10	8.10816e-11	0.000536867
164	1.24461e-09	1.50376e-10	1.25314e-11	8.29741e-05
165	2.57553e-09	3.1118e-10	2.59317e-11	0.000171702
166	2.91517e-09	3.52216e-10	2.93513e-11	0.000194345
167	5.7656e-09	6.96611e-10	5.8051e-11	0.000384374
168	2.73218e-09	3.30108e-10	2.7509e-11	0.000182146
169	6.3282e-09	7.64586e-10	6.37155e-11	0.00042188
170	6.75962e-09	8.1671e-10	6.80591e-11	0.000450641
171	6.49099e-09	7.84254e-10	6.53545e-11	0.000432733
172	9.03666e-09	1.09183e-09	9.09855e-11	0.000602444
173	3.64971e-09	4.40965e-10	3.67471e-11	0.000243314
174	3.94922e-09	4.77152e-10	3.97626e-11	0.000263281
175	4.39053e-09	5.30472e-10	4.4206e-11	0.000292702
176	9.89077e-09	1.19502e-09	9.95852e-11	0.000659385
177	3.19276e-09	3.85756e-10	3.21463e-11	0.000212851
178	3.43716e-09	4.15284e-10	3.4607e-11	0.000229144
179	5.65913e-09	6.83746e-10	5.69789e-11	0.000377275
180	3.08688e-09	3.72963e-10	3.10802e-11	0.000205792
181	2.94274e-09	3.55547e-10	2.96289e-11	0.000196182
182	5.767e-09	6.9678e-10	5.8065e-11	0.000384466
183	3.38817e-09	4.09365e-10	3.41138e-11	0.000225878
184	2.62283e-09	3.16895e-10	2.64079e-11	0.000174855
185	6.2351e-09	7.53337e-10	6.27781e-11	0.000415673
186	1.39978e-09	1.69124e-10	1.40936e-11	9.33184e-05
187	3.13554e-09	3.78842e-10	3.15702e-11	0.000209036
188	4.641e-09	5.60734e-10	4.67278e-11	0.0003094
189	2.98414e-09	3.60549e-10	3.00458e-11	0.000198942
190	5.46953e-09	6.60839e-10	5.50699e-11	0.000364635
191	1.98624e-09	2.39981e-10	1.99984e-11	0.000132416
192	3.76837e-09	4.55302e-10	3.79419e-11	0.000251225
193	2.33688e-09	2.82346e-10	2.35289e-11	0.000155792
194	3.08971e-09	3.73304e-10	3.11087e-11	0.000205981
195	7.20911e-09	8.71019e-10	7.25849e-11	0.000480608
196	4.38206e-09	5.29449e-10	4.41208e-11	0.000292137
197	4.58282e-09	5.53705e-10	4.61421e-11	0.000305521
198	2.96957e-09	3.58789e-10	2.98991e-11	0.000197971
199	2.84839e-09	3.44148e-10	2.8679e-11	0.000189892
200	4.48091e-09	5.41393e-10	4.51161e-11	0.000298728
201	5.87973e-09	7.10401e-10	5.92001e-11	0.000391982
202	3.60392e-09	4.35432e-10	3.6286e-11	0.000240261
203	4.40794e-09	5.32576e-10	4.43813e-11	0.000293863
204	4.43902e-09	5.36331e-10	4.46942e-11	0.000295935
205	3.12315e-09	3.77345e-10	3.14454e-11	0.00020821
206	4.7498e-09	5.7388e-10	4.78234e-11	0.000316654
207	2.96767e-09	3.58559e-10	2.98799e-11	0.000197844
208	4.8684e-09	5.8821e-10	4.90175e-11	0.00032456
209	6.65082e-09	8.03565e-10	6.69638e-11	0.000443388
210	1.50792e-09	1.8219e-10	1.51825e-11	0.000100528
211	3.2925e-09	3.97806e-10	3.31505e-11	0.0002195
212	2.51173e-09	3.03472e-10	2.52894e-11	0.000167449
213	1.91042e-09	2.30821e-10	1.92351e-11	0.000127361
214	4.14868e-09	5.01251e-10	4.17709e-11	0.000276579
215	2.44057e-09	2.94874e-10	2.45729e-11	0.000162705
216	6.02621e-09	7.28098e-10	6.06748e-11	0.000401747
217	2.63358e-09	3.18194e-10	2.65162e-11	0.000175572
218	4.16397e-09	5.03098e-10	4.19249e-11	0.000277598
219	4.60736e-09	5.5667e-10	4.63891e-11	0.000307157
220	5.47817e-09	6.61883e-10	5.51569e-11	0.000365211
221	4.24418e-09	5.1279e-10	4.27325e-11	0.000282945
222	4.60524e-09	5.56414e-10	4.63678e-11	0.000307016
223	1.01315e-08	1.22411e-09	1.02009e-10	0.000675434
224	2.16481e-09	2.61556e-10	2.17964e-11	0.000144321
225	6.41447e-09	7.75008e-10	6.4584e-11	0.000427631
226	7.19299e-09	8.69071e-10	7.24226e-11	0.000479533
227	1.96313e-09	2.3719e-10	1.97658e-11	0.000130876
228	2.51213e-09	3.03521e-10	2.52934e-11	0.000167476
229	9.43874e-09	1.14041e-09	9.50339e-11	0.00062925
230	2.53102e-09	3.05802e-10	2.54835e-11	0.000168735
231	7.44522e-09	8.99545e-10	7.49621e-11	0.000496348
232	2.62209e-09	3.16806e-10	2.64005e-11	0.000174806
233	4.21773e-09	5.09594e-10	4.24662e-11	0.000281182
234	3.45609e-09	4.17572e-10	3.47976e-11	0.000230406
235	2.4244e-09	2.9292e-10	2.441e-11	0.000161626
236	6.9922e-09	8.44811e-10	7.04009e-11	0.000466147
237	3.14289e-09	3.7973e-10	3.16441e-11	0.000209526
238	2.21499e-09	2.6762e-10	2.23016e-11	0.000147666
239	4.05395e-09	4.89806e-10	4.08172e-11	0.000270263
240	3.57025e-09	4.31364e-10	3.5947e-11	0.000238017
241	5.25888e-09	6.35388e-10	5.2949e-11	0.000350592
242	4.20568e-09	5.08139e-10	4.23449e-11	0.000280379
243	2.94357e-09	3.55647e-10	2.96373e-11	0.000196238
244	5.65922e-09	6.83758e-10	5.69798e-11	0.000377281
245	4.69269e-09	5.6698e-10	4.72483e-11	0.000312846
246	4.11901e-09	4.97666e-10	4.14722e-11	0.0002746
247	5.25298e-09	6.34676e-10	5.28896e-11	0.000350199
248	3.97349e-09	4.80085e-10	4.00071e-11	0.0002649
249	4.2119e-09	5.0889e-10	4.24075e-11	0.000280793
250	1.03188e-08	1.24673e-09	1.03895e-10	0.000687918
251	4.52796e-09	5.47077e-10	4.55898e-11	0.000301864
252	4.50606e-09	5.44431e-10	4.53692e-11	0.000300404
253	3.91353e-09	4.7284e-10	3.94033e-11	0.000260902
254	3.55564e-09	4.29599e-10	3.57999e-11	0.000237043
255	2.24938e-09	2.71775e-10	2.26479e-11	0.000149959
256	6.50379e-09	7.858e-10	6.54834e-11	0.000433586
257	2.87735e-09	3.47647e-10	2.89706e-11	0.000191823
258	5.83794e-09	7.05351e-10	5.87793e-11	0.000389196
259	5.50678e-09	6.6534e-10	5.5445e-11	0.000367119
260	2.90523e-09	3.51015e-10	2.92513e-11	0.000193682
261	4.95893e-09	5.99147e-10	4.99289e-11	0.000330595
262	1.3485e-09	1.62929e-10	1.35774e-11	8.99003e-05
263	6.02632e-09	7.28112e-10	6.0676e-11	0.000401755
264	8.60095e-09	1.03918e-09	8.65986e-11	0.000573396
265	3.47327e-09	4.19647e-10	3.49706e-11	0.000231551
266	2.35455e-09	2.84481e-10	2.37068e-11	0.00015697
267	6.01142e-09	7.26312e-10	6.0526e-11	0.000400762
268	5.20379e-09	6.28732e-10	5.23943e-11	0.000346919
269	3.76898e-09	4.55375e-10	3.79479e-11	0.000251265
270	3.92234e-09	4.73904e-10	3.9492e-11	0.000261489
271	4.73683e-09	5.72313e-10	4.76927e-11	0.000315789
272	2.27811e-09	2.75246e-10	2.29371e-11	0.000151874
273	1.64844e-09	1.99167e-10	1.65973e-11	0.000109896
274	4.24306e-09	5.12655e-10	4.27213e-11	0.000282871
275	6.43699e-09	7.77729e-10	6.48107e-11	0.000429132
276	1.78434e-09	2.15587e-10	1.79656e-11	0.000118956
277	6.45289e-09	7.7965e-10	6.49709e-11	0.000430193
278	1.14765e-09	1.38662e-10	1.15551e-11	7.65103e-05
279	3.95419e-09	4.77753e-10	3.98127e-11	0.000263613
280	4.36572e-09	5.27474e-10	4.39562e-11	0.000291048
281	3.25326e-09	3.93065e-10	3.27555e-11	0.000216884
282	3.48513e-09	4.2108e-10	3.509e-11	0.000232342
283	3.33126e-09	4.02489e-10	3.35408e-11	0.000222084
284	4.48458e-09	5.41836e-10	4.5153e-11	0.000298972
285	1.20921e-09	1.46099e-10	1.21749e-11	8.0614e-05
286	8.41975e-09	1.01729e-09	8.47742e-11	0.000561317
287	2.68294e-09	3.24158e-10	2.70131e-11	0.000178863
288	4.21639e-09	5.09433e-10	4.24527e-11	0.000281093
289	2.44366e-09	2.95247e-10	2.46039e-11	0.00016291
290	3.41652e-09	4.1279e-10	3.43992e-11	0.000227768
291	2.13384e-09	2.57815e-10	2.14846e-11	0.000142256
292	8.04512e-09	9.72027e-10	8.10022e-11	0.000536341
293	2.8064e-09	3.39075e-10	2.82562e-11	0.000187093
294	6.69244e-09	8.08594e-10	6.73828e-11	0.000446163
295	2.43864e-09	2.94642e-10	2.45535e-11	0.000162576
296	5.21185e-09	6.29706e-10	5.24755e-11	0.000347457
297	5.84571e-09	7.0629e-10	5.88575e-11	0.000389714
298	3.77105e-09	4.55626e-10	3.79688e-11	0.000251404
299	2.05249e-09	2.47985e-10	2.06655e-11	0.000136832
300	2.58259e-09	3.12034e-10	2.60028e-11	0.000172173
301	3.60642e-09	4.35735e-10	3.63112e-11	0.000240428
302	2.38399e-09	2.88038e-10	2.40032e-11	0.000158932
303	4.86366e-09	5.87637e-10	4.89698e-11	0.000324244
304	3.95403e-09	4.77733e-10	3.98111e-11	0.000263602
305	7.60635e-09	9.19014e-10	7.65845e-11	0.00050709
306	2.31684e-09	2.79924e-10	2.3327e-11	0.000154456
307	3.88799e-09	4.69755e-10	3.91462e-11	0.0002592
308	2.4314e-09	2.93766e-10	2.44805e-11	0.000162093
309	8.51846e-09	1.02922e-09	8.5768e-11	0.000567897
310	2.92923e-09	3.53915e-10	2.94929e-11	0.000195282
311	4.86684e-09	5.8802e-10	4.90017e-11	0.000324456
312	3.41413e-09	4.12502e-10	3.43751e-11	0.000227609
313	4.24146e-09	5.12461e-10	4.27051e-11	0.000282764
314	9.11397e-09	1.10117e-09	9.1764e-11	0.000607598
315	4.85233e-09	5.86268e-10	4.88557e-11	0.000323489
316	3.92474e-09	4.74194e-10	3.95162e-11	0.000261649
317	4.59576e-09	5.55269e-10	4.62724e-11	0.000306384
318	3.40333e-09	4.11197e-10	3.42664e-11	0.000226889
319	2.4923e-09	3.01125e-10	2.50938e-11	0.000166154
320	1.87303e-09	2.26303e-10	1.88586e-11	0.000124868
321	2.14644e-09	2.59337e-10	2.16115e-11	0.000143096
322	7.23842e-09	8.7456e-10	7.288e-11	0.000482561
323	3.76955e-09	4.55444e-10	3.79537e-11	0.000251303
324	2.24548e-09	2.71303e-10	2.26086e-11	0.000149699
325	1.24368e-08	1.50264e-09	1.2522e-10	0.000829121
326	2.21646e-09	2.67797e-10	2.23165e-11	0.000147764
327	2.45145e-09	2.96188e-10	2.46824e-11	0.00016343
328	7.90368e-09	9.54938e-10	7.95782e-11	0.000526912
329	3.22921e-09	3.90159e-10	3.25133e-11	0.000215281
330	3.43691e-09	4.15254e-10	3.46045e-11	0.000229127
331	2.97154e-09	3.59027e-10	2.99189e-11	0.000198102
332	3.96209e-09	4.78707e-10	3.98923e-11	0.000264139
333	3.50003e-09	4.22881e-10	3.52401e-11	0.000233336
334	4.94622e-09	5.97612e-10	4.9801e-11	0.000329748
335	2.40262e-09	2.9029e-10	2.41908e-11	0.000160175
336	4.36817e-09	5.27771e-10	4.39809e-11	0.000291211
337	2.66934e-09	3.22514e-10	2.68762e-11	0.000177956
338	3.32317e-09	4.01511e-10	3.34593e-11	0.000221544
339	3.62713e-09	4.38237e-10	3.65197e-11	0.000241809
340	6.57702e-09	7.94648e-10	6.62207e-11	0.000438468
341	3.29292e-09	3.97857e-10	3.31548e-11	0.000219528
342	1.34615e-09	1.62644e-10	1.35537e-11	8.97434e-05
343	6.8465e-09	8.27207e-10	6.89339e-11	0.000456433
344	1.00199e-08	1.21062e-09	1.00885e-10	0.00066799
345	3.32427e-09	4.01645e-10	3.34704e-11	0.000221618
346	2.74194e-09	3.31286e-10	2.76072e-11	0.000182796
347	3.29064e-09	3.97581e-10	3.31318e-11	0.000219376
348	4.74101e-09	5.72818e-10	4.77349e-11	0.000316068
349	5.99711e-09	7.24583e-10	6.03819e-11	0.000399808
350	4.7329e-09	5.71838e-10	4.76532e-11	0.000315527
351	3.09288e-09	3.73688e-10	3.11406e-11	0.000206192
352	4.41006e-09	5.32832e-10	4.44026e-11	0.000294004
353	4.83801e-09	5.84537e-10	4.87115e-11	0.000322534
354	3.59286e-09	4.34096e-10	3.61747e-11	0.000239524
355	3.83392e-09	4.63221e-10	3.86018e-11	0.000255594
356	3.58242e-09	4.32835e-10	3.60696e-11	0.000238828
357	4.84531e-09	5.8542e-10	4.8785e-11	0.000323021
358	3.3359e-09	4.0305e-10	3.35875e-11	0.000222393
359	4.88157e-09	5.89801e-10	4.91501e-11	0.000325438
360	4.13739e-09	4.99887e-10	4.16573e-11	0.000275826
361	3.40087e-09	4.109e-10	3.42416e-11	0.000226725
362	6.67234e-09	8.06165e-10	6.71804e-11	0.000444823
363	4.42325e-09	5.34426e-10	4.45355e-11	0.000294884
364	4.18846e-09	5.06058e-10	4.21715e-11	0.000279231
365	7.39623e-09	8.93627e-10	7.44689e-11	0.000493082
366	3.37344e-09	4.07586e-10	3.39655e-11	0.000224896
367	2.78089e-09	3.35993e-10	2.79994e-11	0.000185393
368	5.44435e-09	6.57796e-10	5.48164e-11	0.000362956
369	1.81141e-09	2.18858e-10	1.82382e-11	0.000120761
370	5.0128e-09	6.05656e-10	5.04713e-11	0.000334186
371	3.5831e-09	4.32917e-10	3.60764e-11	0.000238873
372	1.09486e-08	1.32283e-09	1.10235e-10	0.000729904
373	4.07566e-09	4.92429e-10	4.10358e-11	0.000271711
374	4.59532e-09	5.55215e-10	4.62679e-11	0.000306354
375	5.32953e-09	6.43924e-10	5.36603e-11	0.000355302
376	4.29864e-09	5.19369e-10	4.32808e-11	0.000286576
377	3.98014e-09	4.80888e-10	4.0074e-11	0.000265343
378	3.05461e-09	3.69064e-10	3.07553e-11	0.000203641
379	3.98695e-09	4.81711e-10	4.01426e-11	0.000265797
380	6.92491e-09	8.36681e-10	6.97234e-11	0.000461661
381	5.36071e-09	6.47691e-10	5.39743e-11	0.000357381
382	5.20612e-09	6.29014e-10	5.24178e-11	0.000347075
383	7.2248e-09	8.72914e-10	7.27428e-11	0.000481653
384	4.43683e-09	5.36066e-10	4.46722e-11	0.000295788
385	3.31188e-09	4.00148e-10	3.33457e-11	0.000220792
386	3.78758e-09	4.57623e-10	3.81352e-11	0.000252505
387	4.41069e-09	5.32907e-10	4.4409e-11	0.000294046
388	3.79569e-09	4.58602e-10	3.82169e-11	0.000253046
389	4.66402e-09	5.63515e-10	4.69596e-11	0.000310934
390	2.70438e-09	3.26748e-10	2.7229e-11	0.000180292
391	4.05514e-09	4.8995e-10	4.08291e-11	0.000270343
392	5.44344e-09	6.57686e-10	5.48072e-11	0.000362896
393	3.22864e-09	3.90091e-10	3.25075e-11	0.000215243
394	4.42936e-09	5.35164e-10	4.4597e-11	0.000295291
395	2.78532e-09	3.36528e-10	2.8044e-11	0.000185688
396	5.41705e-09	6.54498e-10	5.45415e-11	0.000361137
397	2.97152e-09	3.59024e-10	2.99187e-11	0.000198101
398	3.34695e-09	4.04385e-10	3.36988e-11	0.00022313
399	4.53491e-09	5.47916e-10	4.56597e-11	0.000302327
400	7.54055e-09	9.11064e-10	7.5922e-11	0.000502704
401	6.37689e-09	7.70469e-10	6.42057e-11	0.000425126
402	2.73119e-09	3.29987e-10	2.7499e-11	0.000182079
403	3.55698e-09	4.29761e-10	3.58134e-11	0.000237132
404	5.89487e-09	7.12229e-10	5.93524e-11	0.000392991
405	1.95751e-09	2.3651e-10	1.97091e-11	0.0001305
406	4.60354e-09	5.56208e-10	4.63507e-11	0.000306903
407	2.26233e-09	2.7334e-10	2.27783e-11	0.000150822
408	4.2983e-09	5.19329e-10	4.32774e-11	0.000286553
409	2.83326e-09	3.4232e-10	2.85266e-11	0.000188884
410	4.61572e-09	5.5768e-10	4.64733e-11	0.000307714
411	6.76281e-09	8.17095e-10	6.80913e-11	0.000450854
412	4.8585e-09	5.87013e-10	4.89177e-11	0.0003239
413	2.44767e-09	2.95732e-10	2.46443e-11	0.000163178
414	5.15955e-09	6.23386e-10	5.19489e-11	0.00034397
415	2.08123e-09	2.51458e-10	2.09549e-11	0.000138749
416	2.83869e-09	3.42976e-10	2.85813e-11	0.000189246
417	5.34668e-09	6.45996e-10	5.3833e-11	0.000356445
418	6.38655e-09	7.71636e-10	6.4303e-11	0.00042577
419	4.58616e-09	5.54109e-10	4.61757e-11	0.000305744
420	3.75507e-09	4.53695e-10	3.78079e-11	0.000250338
421	2.75497e-09	3.32861e-10	2.77384e-11	0.000183665
422	4.28307e-09	5.17489e-10	4.31241e-11	0.000285538
423	2.92345e-09	3.53217e-10	2.94348e-11	0.000194897
424	4.97502e-09	6.01092e-10	5.0091e-11	0.000331668
425	3.67197e-09	4.43654e-10	3.69712e-11	0.000244798
426	2.79031e-09	3.37131e-10	2.80943e-11	0.000186021
427	2.89692e-09	3.50011e-10	2.91676e-11	0.000193128
428	2.27376e-09	2.7472e-10	2.28933e-11	0.000151584
429	1.65552e-09	2.00024e-10	1.66686e-11	0.000110368
430	3.14111e-09	3.79515e-10	3.16263e-11	0.000209408
431	4.55821e-09	5.50732e-10	4.58943e-11	0.000303881
432	5.72105e-09	6.91229e-10	5.76024e-11	0.000381403
433	7.08103e-09	8.55544e-10	7.12953e-11	0.000472069
434	3.26948e-09	3.95024e-10	3.29187e-11	0.000217965
435	4.4981e-09	5.4347e-10	4.52891e-11	0.000299874
436	3.79444e-09	4.58452e-10	3.82043e-11	0.000252963
437	6.62733e-09	8.00727e-10	6.67272e-11	0.000441822
438	4.51149e-09	5.45087e-10	4.54239e-11	0.000300766
439	2.45771e-09	2.96945e-10	2.47454e-11	0.000163847
440	6.87275e-09	8.30379e-10	6.91982e-11	0.000458183
441	6.73553e-09	8.138e-10	6.78166e-11	0.000449035
442	3.49236e-09	4.21953e-10	3.51628e-11	0.000232824
443	3.09952e-09	3.7449e-10	3.12075e-11	0.000206634
444	3.55389e-09	4.29388e-10	3.57823e-11	0.000236926
445	5.94573e-09	7.18374e-10	5.98645e-11	0.000396382
446	3.07937e-09	3.72056e-10	3.10046e-11	0.000205291
447	5.64658e-09	6.8223e-10	5.68525e-11	0.000376438
448	4.72552e-09	5.70947e-10	4.75789e-11	0.000315035
449	2.83682e-09	3.42751e-10	2.85625e-11	0.000189122
450	4.13538e-09	4.99645e-10	4.16371e-11	0.000275692
451	5.3154e-09	6.42217e-10	5.35181e-11	0.00035436
452	4.99339e-09	6.0331e-10	5.02759e-11	0.000332892
453	3.58368e-09	4.32987e-10	3.60823e-11	0.000238912
454	3.98536e-09	4.81519e-10	4.01265e-11	0.000265691
455	8.80422e-09	1.06374e-09	8.86452e-11	0.000586948
456	5.10517e-09	6.16816e-10	5.14014e-11	0.000340345
457	1.88511e-09	2.27763e-10	1.89802e-11	0.000125674
458	3.90951e-09	4.72355e-10	3.93629e-11	0.000260634
459	8.6701e-09	1.04754e-09	8.72948e-11	0.000578007
460	4.12803e-09	4.98757e-10	4.15631e-11	0.000275202
461	4.08422e-09	4.93463e-10	4.11219e-11	0.000272281
462	2.35795e-09	2.84892e-10	2.3741e-11	0.000157196
463	6.61184e-09	7.98856e-10	6.65713e-11	0.00044079
464	4.04462e-09	4.88679e-10	4.07232e-11	0.000269641
465	1.9614e-09	2.36981e-10	1.97484e-11	0.00013076
466	4.0144e-09	4.85027e-10	4.04189e-11	0.000267626
467	2.53226e-09	3.05952e-10	2.5496e-11	0.000168817
468	2.80784e-09	3.39249e-10	2.82708e-11	0.00018719
469	4.06976e-09	4.91716e-10	4.09764e-11	0.000271317
470	8.86392e-09	1.07096e-09	8.92464e-11	0.000590928
471	2.90806e-09	3.51358e-10	2.92798e-11	0.000193871
472	3.27405e-09	3.95577e-10	3.29647e-11	0.00021827
473	5.23847e-09	6.32922e-10	5.27435e-11	0.000349231
474	4.19873e-09	5.07298e-10	4.22748e-11	0.000279915
475	3.09e-09	3.7334e-10	3.11117e-11	0.000206
476	4.44586e-09	5.37157e-10	4.47631e-11	0.000296391
477	4.65945e-09	5.62964e-10	4.69137e-11	0.00031063
478	3.43798e-09	4.15383e-10	3.46152e-11	0.000229198
479	1.90765e-09	2.30486e-10	1.92071e-11	0.000127177
480	3.67629e-09	4.44176e-10	3.70147e-11	0.000245086
481	5.49373e-09	6.63763e-10	5.53136e-11	0.000366249
482	9.19055e-09	1.11042e-09	9.2535e-11	0.000612704
483	4.14785e-09	5.01151e-10	4.17626e-11	0.000276523
484	1.91432e-09	2.31292e-10	1.92743e-11	0.000127621
485	2.83557e-09	3.426e-10	2.855e-11	0.000189038
486	2.91339e-09	3.52001e-10	2.93334e-11	0.000194226
487	3.29172e-09	3.97712e-10	3.31426e-11	0.000219448
488	4.83809e-09	5.84547e-10	4.87122e-11	0.000322539
489	1.15877e-08	1.40004e-09	1.1667e-10	0.000772511
490	1.59016e-08	1.92126e-09	1.60105e-10	0.00106011
491	5.07711e-09	6.13426e-10	5.11188e-11	0.000338474
492	8.12889e-09	9.82149e-10	8.18457e-11	0.000541926
493	1.28806e-08	1.55626e-09	1.29688e-10	0.000858707
494	4.72679e-09	5.711e-10	4.75917e-11	0.000315119
495	5.01797e-09	6.0628e-10	5.05234e-11	0.000334531
496	3.66603e-09	4.42937e-10	3.69114e-11	0.000244402
497	2.74507e-09	3.31665e-10	2.76387e-11	0.000183005
498	3.11381e-09	3.76216e-10	3.13513e-11	0.000207587
499	7.16111e-09	8.65219e-10	7.21016e-11	0.000477408
500	1.58772e-09	1.91832e-10	1.5986e-11	0.000105848
501	2.12569e-09	2.5683e-10	2.14025e-11	0.000141712
502	3.67713e-09	4.44278e-10	3.70231e-11	0.000245142
503	2.63421e-09	3.1827e-10	2.65225e-11	0.000175614
504	2.35545e-09	2.8459e-10	2.37159e-11	0.00015703
505	3.66347e-09	4.42627e-10	3.68856e-11	0.000244231
506	6.44833e-09	7.791e-10	6.4925e-11	0.000429889
507	2.57134e-09	3.10675e-10	2.58895e-11	0.000171423
508	3.26298e-09	3.9424e-10	3.28533e-11	0.000217532
509	5.59726e-09	6.76272e-10	5.6356e-11	0.000373151
510	3.38071e-09	4.08463e-10	3.40386e-11	0.00022538
511	3.29679e-09	3.98324e-10	3.31937e-11	0.000219786
512	3.68326e-09	4.45018e-10	3.70849e-11	0.000245551
513	7.94901e-09	9.60415e-10	8.00346e-11	0.000529934
514	3.53138e-09	4.26668e-10	3.55557e-11	0.000235426
515	2.19199e-09	2.64841e-10	2.20701e-11	0.000146133
516	3.94579e-09	4.76737e-10	3.97281e-11	0.000263052
517	4.27178e-09	5.16125e-10	4.30104e-11	0.000284786
518	3.39612e-09	4.10326e-10	3.41938e-11	0.000226408
519	3.59203e-09	4.33997e-10	3.61664e-11	0.000239469
520	8.41853e-09	1.01714e-09	8.47619e-11	0.000561235
521	2.32723e-09	2.81181e-10	2.34317e-11	0.000155149
522	3.41093e-09	4.12115e-10	3.43429e-11	0.000227395
523	9.04591e-09	1.09294e-09	9.10787e-11	0.000603061
524	5.75039e-09	6.94773e-10	5.78978e-11	0.00038336
525	4.42319e-09	5.34418e-10	4.45349e-11	0.000294879
526	3.03863e-09	3.67134e-10	3.05945e-11	0.000202576
527	5.01773e-09	6.06252e-10	5.0521e-11	0.000334515
528	4.28527e-09	5.17755e-10	4.31462e-11	0.000285685
529	3.14844e-09	3.80401e-10	3.17001e-11	0.000209896
530	4.25014e-09	5.13511e-10	4.27926e-11	0.000283343
531	1.89776e-09	2.29291e-10	1.91076e-11	0.000126517
532	3.2143e-09	3.88358e-10	3.23632e-11	0.000214287
533	5.72006e-09	6.91109e-10	5.75924e-11	0.000381337
534	6.62849e-09	8.00867e-10	6.67389e-11	0.0004419
535	7.14769e-09	8.63597e-10	7.19664e-11	0.000476512
536	5.96931e-09	7.21223e-10	6.01019e-11	0.000397954
537	7.52499e-09	9.09184e-10	7.57653e-11	0.000501666
538	7.90557e-09	9.55167e-10	7.95972e-11	0.000527038
539	2.75969e-09	3.33431e-10	2.77859e-11	0.000183979
540	4.05839e-09	4.90343e-10	4.08619e-11	0.00027056
541	4.32105e-09	5.22077e-10	4.35064e-11	0.00028807
542	6.96487e-09	8.41509e-10	7.01258e-11	0.000464325
543	4.34448e-09	5.24909e-10	4.37424e-11	0.000289632
544	4.80733e-09	5.8083e-10	4.84025e-11	0.000320488
545	3.16606e-09	3.8253e-10	3.18775e-11	0.000211071
546	2.21574e-09	2.6771e-10	2.23092e-11	0.000147716
547	4.29407e-09	5.18817e-10	4.32348e-11	0.000286271
548	4.48246e-09	5.4158e-10	4.51317e-11	0.000298831
549	1.87668e-09	2.26744e-10	1.88953e-11	0.000125112
550	3.15317e-09	3.80972e-10	3.17477e-11	0.000210211
551	4.9773e-09	6.01367e-10	5.01139e-11	0.00033182
552	5.21705e-09	6.30334e-10	5.25279e-11	0.000347804
553	9.45825e-09	1.14276e-09	9.52303e-11	0.00063055
554	3.22679e-09	3.89867e-10	3.24889e-11	0.000215119
555	3.67434e-09	4.43941e-10	3.69951e-11	0.000244956
556	2.30584e-09	2.78596e-10	2.32163e-11	0.000153723
557	5.6339e-09	6.80698e-10	5.67249e-11	0.000375593
558	6.08102e-09	7.34721e-10	6.12267e-11	0.000405401
559	8.63271e-09	1.04302e-09	8.69184e-11	0.000575514
560	3.8397e-09	4.63919e-10	3.86599e-11	0.00025598
561	3.67216e-09	4.43678e-10	3.69732e-11	0.000244811
562	1.69397e-09	2.04668e-10	1.70557e-11	0.000112931
563	3.1259e-09	3.77678e-10	3.14731e-11	0.000208394
564	1.94678e-09	2.35214e-10	1.96012e-11	0.000129786
565	2.80086e-09	3.38405e-10	2.82004e-11	0.000186724
566	4.39301e-09	5.30772e-10	4.4231e-11	0.000292867
567	3.85046e-09	4.6522e-10	3.87684e-11	0.000256698
568	4.84086e-09	5.84882e-10	4.87402e-11	0.000322724
569	2.66157e-09	3.21576e-10	2.6798e-11	0.000177438
570	3.49069e-09	4.21752e-10	3.5146e-11	0.000232713
571	2.83364e-09	3.42366e-10	2.85305e-11	0.000188909
572	6.30451e-09	7.61722e-10	6.34769e-11	0.0004203
573	7.79082e-09	9.41302e-10	7.84418e-11	0.000519388
574	4.86472e-09	5.87765e-10	4.89804e-11	0.000324315
575	1.05019e-08	1.26886e-09	1.05739e-10	0.000700128
576	5.00679e-09	6.0493e-10	5.04108e-11	0.000333786
577	6.79951e-09	8.2153e-10	6.84608e-11	0.000453301
578	6.12336e-09	7.39836e-10	6.1653e-11	0.000408224
579	3.45478e-09	4.17414e-10	3.47845e-11	0.000230319
580	4.52594e-09	5.46833e-10	4.55694e-11	0.000301729
581	3.07899e-09	3.72009e-10	3.10007e-11	0.000205266
582	5.84826e-09	7.06598e-10	5.88832e-11	0.000389884
583	2.75361e-09	3.32696e-10	2.77247e-11	0.000183574
584	2.12038e-09	2.56188e-10	2.1349e-11	0.000141358
585	4.562e-09	5.51189e-10	4.59324e-11	0.000304133
586	4.01942e-09	4.85634e-10	4.04695e-11	0.000267961
587	2.41204e-09	2.91427e-10	2.42856e-11	0.000160803
588	2.89945e-09	3.50317e-10	2.91931e-11	0.000193296
589	4.11482e-09	4.97161e-10	4.143e-11	0.000274321
590	3.07198e-09	3.71162e-10	3.09302e-11	0.000204798
591	3.591e-09	4.33872e-10	3.6156e-11	0.0002394
592	7.19143e-09	8.68882e-10	7.24069e-11	0.000479429
593	6.60634e-09	7.98191e-10	6.65159e-11	0.000440423
594	4.30837e-09	5.20545e-10	4.33788e-11	0.000287225
595	2.76721e-09	3.34339e-10	2.78616e-11	0.00018448
596	3.7743e-09	4.56019e-10	3.80016e-11	0.00025162
597	3.82666e-09	4.62345e-10	3.85287e-11	0.000255111
598	5.84977e-09	7.0678e-10	5.88984e-11	0.000389985
599	3.24452e-09	3.92009e-10	3.26674e-11	0.000216301
600	1.69555e-09	2.04859e-10	1.70716e-11	0.000113037
601	3.79295e-09	4.58271e-10	3.81893e-11	0.000252863
602	7.20899e-09	8.71004e-10	7.25837e-11	0.000480599
603	6.91365e-09	8.3532e-10	6.961e-11	0.00046091
604	3.71501e-09	4.48854e-10	3.74045e-11	0.000247667
605	8.80677e-09	1.06405e-09	8.86709e-11	0.000587118
606	2.51489e-09	3.03854e-10	2.53211e-11	0.000167659
607	1.02881e-08	1.24303e-09	1.03586e-10	0.000685873
608	6.13904e-09	7.41731e-10	6.18109e-11	0.000409269
609	3.78307e-09	4.57078e-10	3.80898e-11	0.000252205
610	2.14031e-09	2.58596e-10	2.15497e-11	0.000142687
611	7.42767e-09	8.97425e-10	7.47855e-11	0.000495178
612	3.14404e-09	3.79869e-10	3.16557e-11	0.000209603
613	3.72696e-09	4.50299e-10	3.75249e-11	0.000248464
614	3.32941e-09	4.02265e-10	3.35221e-11	0.00022196
615	3.49317e-09	4.22051e-10	3.51709e-11	0.000232878
616	2.71162e-09	3.27623e-10	2.7302e-11	0.000180775
617	3.86058e-09	4.66443e-10	3.88702e-11	0.000257372
618	3.3143e-09	4.0044e-10	3.337e-11	0.000220953
619	8.10324e-09	9.79049e-10	8.15874e-11	0.000540216
620	1.65755e-09	2.00269e-10	1.66891e-11	0.000110504
621	3.42239e-09	4.135e-10	3.44583e-11	0.000228159
622	4.86483e-09	5.87778e-10	4.89815e-11	0.000324322
623	1.61317e-09	1.94906e-10	1.62422e-11	0.000107545
624	2.5775e-09	3.11418e-10	2.59515e-11	0.000171833
625	2.20645e-09	2.66588e-10	2.22156e-11	0.000147097
626	3.79048e-09	4.57973e-10	3.81644e-11	0.000252699
627	3.55705e-09	4.29769e-10	3.58141e-11	0.000237136
628	5.31965e-09	6.4273e-10	5.35608e-11	0.000354643
629	4.49172e-09	5.42698e-10	4.52249e-11	0.000299448
630	8.16297e-09	9.86265e-10	8.21888e-11	0.000544198
631	4.17601e-09	5.04553e-10	4.20461e-11	0.0002784
632	4.05156e-09	4.89518e-10	4.07931e-11	0.000270104
633	3.82918e-09	4.62649e-10	3.8554e-11	0.000255279
634	4.68603e-09	5.66175e-10	4.71812e-11	0.000312402
635	1.61116e-09	1.94664e-10	1.6222e-11	0.000107411
636	4.87865e-09	5.89447e-10	4.91206e-11	0.000325243
637	5.52866e-09	6.67983e-10	5.56653e-11	0.000368577
638	4.00535e-09	4.83935e-10	4.03279e-11	0.000267024
639	2.78888e-09	3.36957e-10	2.80798e-11	0.000185925
640	5.8229e-09	7.03534e-10	5.86279e-11	0.000388193
641	4.50881e-09	5.44763e-10	4.53969e-11	0.000300587
642	3.0011e-09	3.62598e-10	3.02165e-11	0.000200073
643	5.38057e-09	6.50091e-10	5.41742e-11	0.000358705
644	4.43329e-09	5.35638e-10	4.46365e-11	0.000295552
645	2.54907e-09	3.07983e-10	2.56653e-11	0.000169938
646	4.58513e-09	5.53984e-10	4.61653e-11	0.000305675
647	3.05637e-09	3.69277e-10	3.0773e-11	0.000203758
648	3.39979e-09	4.10769e-10	3.42308e-11	0.000226653
649	2.88142e-09	3.48139e-10	2.90116e-11	0.000192095
650	4.82649e-09	5.83146e-10	4.85955e-11	0.000321766
651	3.6294e-09	4.38511e-10	3.65426e-11	0.00024196
652	5.69617e-09	6.88222e-10	5.73519e-11	0.000379745
653	5.63802e-09	6.81196e-10	5.67663e-11	0.000375868
654	4.00156e-09	4.83476e-10	4.02896e-11	0.00026677
655	4.00236e-09	4.83573e-10	4.02978e-11	0.000266824
656	7.08074e-09	8.55509e-10	7.12924e-11	0.000472049
657	5.50831e-09	6.65525e-10	5.54604e-11	0.000367221
658	5.43801e-09	6.57031e-10	5.47526e-11	0.000362534
659	3.26726e-09	3.94757e-10	3.28964e-11	0.000217817
660	1.57045e-08	1.89745e-09	1.58121e-10	0.00104697
661	3.04452e-09	3.67845e-10	3.06537e-11	0.000202968
662	2.54351e-09	3.07311e-10	2.56093e-11	0.000169567
663	6.79148e-09	8.2056e-10	6.838e-11	0.000452766
664	5.52308e-09	6.67309e-10	5.56091e-11	0.000368205
665	4.67224e-09	5.6451e-10	4.70425e-11	0.000311483
666	3.30869e-09	3.99762e-10	3.33135e-11	0.000220579
667	3.10073e-09	3.74636e-10	3.12197e-11	0.000206715
668	3.70636e-09	4.47809e-10	3.73174e-11	0.00024709
669	7.07922e-09	8.55326e-10	7.12771e-11	0.000471948
670	4.96262e-09	5.99594e-10	4.99661e-11	0.000330842
671	5.72207e-09	6.91352e-10	5.76126e-11	0.000381471
672	5.97654e-09	7.22097e-10	6.01747e-11	0.000398436
673	4.99996e-09	6.04105e-10	5.03421e-11	0.000333331
674	6.87687e-09	8.30877e-10	6.92397e-11	0.000458458
675	2.40319e-09	2.90358e-10	2.41965e-11	0.000160213
676	4.64661e-09	5.61413e-10	4.67844e-11	0.000309774
677	5.04755e-09	6.09855e-10	5.08213e-11	0.000336504
678	3.87415e-09	4.68083e-10	3.90069e-11	0.000258277
679	4.02051e-09	4.85766e-10	4.04805e-11	0.000268034
680	4.39474e-09	5.30981e-10	4.42484e-11	0.000292983
681	2.65527e-09	3.20814e-10	2.67345e-11	0.000177018
682	7.27471e-09	8.78944e-10	7.32453e-11	0.00048498
683	5.43103e-09	6.56188e-10	5.46823e-11	0.000362069
684	6.99757e-09	8.4546e-10	7.0455e-11	0.000466505
685	4.25335e-09	5.13898e-10	4.28248e-11	0.000283557
686	3.02723e-09	3.65756e-10	3.04796e-11	0.000201815
687	9.68557e-09	1.17023e-09	9.7519e-11	0.000645704
688	3.61366e-09	4.36609e-10	3.63841e-11	0.000240911
689	5.01109e-09	6.0545e-10	5.04542e-11	0.000334073
690	2.95742e-09	3.57322e-10	2.97768e-11	0.000197162
691	4.78482e-09	5.78111e-10	4.81759e-11	0.000318988
692	2.54604e-09	3.07617e-10	2.56348e-11	0.000169736
693	3.57864e-09	4.32378e-10	3.60315e-11	0.000238576
694	3.61482e-09	4.3675e-10	3.63958e-11	0.000240988
695	4.86675e-09	5.8801e-10	4.90009e-11	0.00032445
696	4.28943e-09	5.18257e-10	4.31881e-11	0.000285962
697	8.15052e-09	9.84762e-10	8.20635e-11	0.000543368
698	7.83998e-09	9.47242e-10	7.89368e-11	0.000522666
699	1.08082e-08	1.30587e-09	1.08822e-10	0.000720547
700	4.23507e-09	5.11689e-10	4.26408e-11	0.000282338
701	3.37774e-09	4.08105e-10	3.40087e-11	0.000225183
702	3.00951e-09	3.63614e-10	3.03012e-11	0.000200634
703	4.65065e-09	5.619e-10	4.6825e-11	0.000310043
704	3.20986e-09	3.87821e-10	3.23184e-11	0.00021399
705	1.23643e-08	1.49388e-09	1.2449e-10	0.000824287
706	8.87009e-09	1.0717e-09	8.93085e-11	0.00059134
707	4.38386e-09	5.29667e-10	4.41389e-11	0.000292257
708	3.61177e-09	4.36381e-10	3.63651e-11	0.000240785
709	2.56631e-09	3.10066e-10	2.58389e-11	0.000171087
710	2.72996e-09	3.29839e-10	2.74866e-11	0.000181997
711	5.54066e-09	6.69433e-10	5.57861e-11	0.000369377
712	5.7167e-09	6.90703e-10	5.75586e-11	0.000381114
713	2.46119e-09	2.97365e-10	2.47804e-11	0.000164079
714	5.49127e-09	6.63466e-10	5.52888e-11	0.000366085
715	2.71573e-09	3.2812e-10	2.73434e-11	0.000181049
716	5.33887e-09	6.45053e-10	5.37544e-11	0.000355925
717	4.74724e-09	5.7357e-10	4.77975e-11	0.000316482
718	6.40197e-09	7.73498e-10	6.44582e-11	0.000426798
719	2.1007e-09	2.5381e-10	2.11509e-11	0.000140046
720	3.6919e-09	4.46063e-10	3.71719e-11	0.000246127
721	3.19581e-09	3.86124e-10	3.2177e-11	0.000213054
722	3.9657e-09	4.79143e-10	3.99286e-11	0.00026438
723	5.39124e-09	6.51379e-10	5.42816e-11	0.000359416
724	5.37281e-09	6.49153e-10	5.40961e-11	0.000358187
725	5.18831e-09	6.26861e-10	5.22384e-11	0.000345887
726	5.5678e-09	6.72712e-10	5.60593e-11	0.000371186
727	5.93137e-09	7.16639e-10	5.97199e-11	0.000395424
728	2.50531e-09	3.02697e-10	2.52247e-11	0.000167021
729	4.2906e-09	5.18398e-10	4.31999e-11	0.00028604
730	3.22403e-09	3.89533e-10	3.24611e-11	0.000214935
731	3.19748e-09	3.86326e-10	3.21938e-11	0.000213165
732	1.03203e-08	1.24692e-09	1.0391e-10	0.000688019
733	5.02263e-09	6.06844e-10	5.05703e-11	0.000334842
734	4.54084e-09	5.48633e-10	4.57194e-11	0.000302723
735	8.14658e-09	9.84285e-10	8.20238e-11	0.000543105
736	3.78623e-09	4.5746e-10	3.81216e-11	0.000252415
737	1.88878e-09	2.28206e-10	1.90171e-11	0.000125919
738	3.14666e-09	3.80186e-10	3.16822e-11	0.000209778
739	3.02661e-09	3.6568e-10	3.04734e-11	0.000201774
740	1.83773e-09	2.22037e-10	1.85031e-11	0.000122515
741	3.47928e-09	4.20374e-10	3.50311e-11	0.000231952
742	4.84043e-09	5.84831e-10	4.87359e-11	0.000322696
743	4.13536e-09	4.99642e-10	4.16368e-11	0.000275691
744	4.2356e-09	5.11753e-10	4.26461e-11	0.000282373
745	2.48923e-09	3.00753e-10	2.50628e-11	0.000165949
746	3.7756e-09	4.56175e-10	3.80146e-11	0.000251707
747	6.18139e-09	7.46848e-10	6.22373e-11	0.000412093
748	6.19167e-09	7.4809e-10	6.23408e-11	0.000412778
749	5.16638e-09	6.24212e-10	5.20176e-11	0.000344425
750	4.73664e-09	5.7229e-10	4.76908e-11	0.000315776
751	1.08169e-08	1.30691e-09	1.08909e-10	0.000721124
752	4.79819e-09	5.79727e-10	4.83106e-11	0.00031988
753	6.86227e-09	8.29113e-10	6.90927e-11	0.000457485
754	2.93597e-09	3.5473e-10	2.95608e-11	0.000195731
755	4.29017e-09	5.18347e-10	4.31955e-11	0.000286011
756	6.51306e-09	7.86921e-10	6.55767e-11	0.000434204
757	3.81706e-09	4.61185e-10	3.84321e-11	0.000254471
758	3.88176e-09	4.69002e-10	3.90835e-11	0.000258784
759	3.76369e-09	4.54736e-10	3.78946e-11	0.000250912
760	7.34729e-09	8.87713e-10	7.39761e-11	0.000489819
761	7.07482e-09	8.54793e-10	7.12328e-11	0.000471655
762	8.21305e-09	9.92316e-10	8.2693e-11	0.000547537
763	4.9691e-09	6.00376e-10	5.00313e-11	0.000331273
764	3.77117e-09	4.5564e-10	3.797e-11	0.000251411
765	9.90764e-09	1.19706e-09	9.9755e-11	0.000660509
766	4.6713e-09	5.64395e-10	4.70329e-11	0.00031142
767	5.86827e-09	7.09016e-10	5.90846e-11	0.000391218
768	3.78672e-09	4.57519e-10	3.81266e-11	0.000252448
769	4.99773e-09	6.03835e-10	5.03196e-11	0.000333182
770	7.9759e-09	9.63664e-10	8.03053e-11	0.000531727
771	4.96444e-09	5.99813e-10	4.99844e-11	0.000330963
772	3.45003e-09	4.16839e-10	3.47366e-11	0.000230002
773	8.17461e-09	9.87672e-10	8.2306e-11	0.000544974
774	4.25454e-09	5.14042e-10	4.28369e-11	0.000283636
775	2.23887e-09	2.70505e-10	2.25421e-11	0.000149258
776	4.24866e-09	5.13331e-10	4.27776e-11	0.000283244
777	3.17269e-09	3.8333e-10	3.19442e-11	0.000211513
778	4.31783e-09	5.21689e-10	4.34741e-11	0.000287855
779	3.50918e-09	4.23986e-10	3.53322e-11	0.000233945
780	6.17426e-09	7.45986e-10	6.21655e-11	0.000411617
781	5.11915e-09	6.18506e-10	5.15422e-11	0.000341277
782	3.09079e-09	3.73435e-10	3.11196e-11	0.000206053
783	2.2035e-08	2.66232e-09	2.2186e-10	0.001469
784	3.18483e-09	3.84798e-10	3.20665e-11	0.000212322
785	3.31592e-09	4.00636e-10	3.33863e-11	0.000221061
786	3.38668e-09	4.09185e-10	3.40987e-11	0.000225778
787	2.9616e-09	3.57826e-10	2.98188e-11	0.00019744
788	3.67241e-09	4.43707e-10	3.69756e-11	0.000244827
789	4.45603e-09	5.38386e-10	4.48655e-11	0.000297068
790	4.42677e-09	5.34851e-10	4.45709e-11	0.000295118
791	2.38533e-09	2.882e-10	2.40167e-11	0.000159022
792	6.08623e-09	7.3535e-10	6.12792e-11	0.000405749
793	2.86405e-09	3.4604e-10	2.88366e-11	0.000190936
794	3.49237e-09	4.21955e-10	3.51629e-11	0.000232825
795	3.24586e-09	3.92172e-10	3.2681e-11	0.000216391
796	5.20745e-09	6.29174e-10	5.24312e-11	0.000347164
797	5.4272e-09	6.55724e-10	5.46437e-11	0.000361813
798	4.91725e-09	5.94112e-10	4.95093e-11	0.000327817
799	6.21303e-09	7.5067e-10	6.25558e-11	0.000414202
800	3.25859e-09	3.93709e-10	3.28091e-11	0.000217239
801	3.16077e-09	3.8189e-10	3.18242e-11	0.000210718
802	1.00014e-08	1.20839e-09	1.00699e-10	0.000666759
803	3.5771e-09	4.32192e-10	3.6016e-11	0.000238473
804	2.9128e-09	3.5193e-10	2.93275e-11	0.000194186
805	4.2518e-09	5.13711e-10	4.28093e-11	0.000283454
806	5.6831e-09	6.86644e-10	5.72203e-11	0.000378874
807	3.73801e-09	4.51633e-10	3.76361e-11	0.000249201
808	7.07121e-09	8.54357e-10	7.11964e-11	0.000471414
809	4.88911e-09	5.90712e-10	4.9226e-11	0.000325941
810	2.20481e-09	2.6639e-10	2.21991e-11	0.000146987
811	2.69081e-09	3.25108e-10	2.70924e-11	0.000179387
812	1.8308e-09	2.21201e-10	1.84334e-11	0.000122054
813	2.22615e-09	2.68968e-10	2.2414e-11	0.00014841
814	3.98219e-09	4.81136e-10	4.00947e-11	0.000265479
815	9.67236e-09	1.16863e-09	9.73861e-11	0.000644824
816	9.71317e-09	1.17356e-09	9.7797e-11	0.000647545
817	5.25541e-09	6.34968e-10	5.2914e-11	0.00035036
818	1.93215e-09	2.33446e-10	1.94538e-11	0.00012881
819	5.42934e-09	6.55984e-10	5.46653e-11	0.000361956
820	3.6218e-09	4.37593e-10	3.64661e-11	0.000241454
821	4.25805e-09	5.14466e-10	4.28722e-11	0.00028387
822	4.84351e-09	5.85202e-10	4.87669e-11	0.000322901
823	3.70454e-09	4.4759e-10	3.72991e-11	0.000246969
824	3.53609e-09	4.27238e-10	3.56031e-11	0.00023574
825	3.7769e-09	4.56333e-10	3.80277e-11	0.000251794
826	7.60472e-09	9.18817e-10	7.65681e-11	0.000506981
827	4.28931e-09	5.18243e-10	4.31869e-11	0.000285954
828	4.40538e-09	5.32266e-10	4.43555e-11	0.000293692
829	5.6032e-09	6.76989e-10	5.64158e-11	0.000373547
830	4.8279e-09	5.83316e-10	4.86097e-11	0.00032186
831	1.74952e-09	2.11381e-10	1.7615e-11	0.000116635
832	5.33845e-09	6.45002e-10	5.37502e-11	0.000355897
833	5.23497e-09	6.325e-10	5.27083e-11	0.000348998
834	7.08019e-09	8.55442e-10	7.12869e-11	0.000472013
835	1.80637e-09	2.18249e-10	1.81874e-11	0.000120424
836	4.99102e-09	6.03025e-10	5.02521e-11	0.000332735
837	6.75142e-09	8.15719e-10	6.79766e-11	0.000450095
838	5.58664e-09	6.74989e-10	5.62491e-11	0.000372443
839	2.04001e-09	2.46478e-10	2.05398e-11	0.000136
840	6.55505e-09	7.91994e-10	6.59995e-11	0.000437004
841	5.57298e-09	6.73338e-10	5.61115e-11	0.000371532
842	3.24434e-09	3.91987e-10	3.26656e-11	0.000216289
843	6.14733e-09	7.42732e-10	6.18944e-11	0.000409822
844	8.11888e-09	9.80939e-10	8.17449e-11	0.000541259
845	4.11784e-09	4.97526e-10	4.14605e-11	0.000274523
846	2.2305e-09	2.69493e-10	2.24578e-11	0.0001487
847	1.22068e-08	1.47485e-09	1.22904e-10	0.000813785
848	5.92058e-09	7.15336e-10	5.96113e-11	0.000394705
849	2.74149e-09	3.31232e-10	2.76027e-11	0.000182766
850	8.13789e-09	9.83235e-10	8.19363e-11	0.000542526
851	3.55347e-09	4.29337e-10	3.57781e-11	0.000236898
852	1.54945e-09	1.87207e-10	1.56006e-11	0.000103297
853	3.9993e-09	4.83203e-10	4.02669e-11	0.00026662
854	2.41278e-09	2.91516e-10	2.4293e-11	0.000160852
855	1.5784e-08	1.90705e-09	1.58921e-10	0.00105227
856	2.69495e-09	3.25609e-10	2.71341e-11	0.000179663
857	6.71884e-09	8.11783e-10	6.76486e-11	0.000447923
858	3.54725e-09	4.28586e-10	3.57155e-11	0.000236484
859	2.68997e-09	3.25007e-10	2.70839e-11	0.000179331
860	4.40413e-09	5.32116e-10	4.4343e-11	0.000293609
861	6.1643e-09	7.44783e-10	6.20653e-11	0.000410954
862	8.55067e-09	1.03311e-09	8.60924e-11	0.000570045
863	1.68801e-09	2.03949e-10	1.69958e-11	0.000112534
864	3.96954e-09	4.79608e-10	3.99673e-11	0.000264636
865	2.74551e-09	3.31718e-10	2.76432e-11	0.000183034
866	2.45979e-09	2.97197e-10	2.47664e-11	0.000163986
867	5.60948e-09	6.77748e-10	5.6479e-11	0.000373965
868	2.47585e-09	2.99136e-10	2.4928e-11	0.000165056
869	4.42379e-09	5.34491e-10	4.45409e-11	0.000294919
870	4.1453e-09	5.00842e-10	4.17369e-11	0.000276353
871	5.44941e-09	6.58408e-10	5.48673e-11	0.000363294
872	3.3471e-09	4.04403e-10	3.37003e-11	0.00022314
873	9.81083e-09	1.18536e-09	9.87803e-11	0.000654056
874	4.30248e-09	5.19834e-10	4.33195e-11	0.000286832
875	4.96772e-09	6.00209e-10	5.00174e-11	0.000331181
876	2.66406e-09	3.21877e-10	2.68231e-11	0.000177604
877	4.4934e-09	5.42901e-10	4.52417e-11	0.00029956
878	1.25721e-09	1.51899e-10	1.26582e-11	8.3814e-05
879	4.72105e-09	5.70406e-10	4.75339e-11	0.000314737
880	5.28091e-09	6.3805e-10	5.31708e-11	0.000352061
881	3.31293e-09	4.00274e-10	3.33562e-11	0.000220862
882	1.92298e-09	2.32339e-10	1.93616e-11	0.000128199
883	6.54268e-09	7.90499e-10	6.58749e-11	0.000436178
884	3.1383e-09	3.79175e-10	3.15979e-11	0.00020922
885	4.16111e-09	5.02753e-10	4.18961e-11	0.000277407
886	9.82115e-09	1.18661e-09	9.88842e-11	0.000654743
887	9.91368e-09	1.19779e-09	9.98158e-11	0.000660912
888	6.13807e-09	7.41613e-10	6.18011e-11	0.000409205
889	1.69393e-09	2.04664e-10	1.70553e-11	0.000112928
890	2.29174e-09	2.76893e-10	2.30744e-11	0.000152783
891	1.81961e-09	2.19849e-10	1.83208e-11	0.000121308
892	4.22318e-09	5.10252e-10	4.2521e-11	0.000281545
893	4.02223e-09	4.85974e-10	4.04978e-11	0.000268149
894	3.16553e-09	3.82466e-10	3.18722e-11	0.000211036
895	1.24081e-08	1.49917e-09	1.24931e-10	0.000827205
896	4.10899e-09	4.96456e-10	4.13714e-11	0.000273933
897	3.74936e-09	4.53005e-10	3.77504e-11	0.000249957
898	5.49259e-09	6.63625e-10	5.53021e-11	0.000366173
899	3.63626e-09	4.3934e-10	3.66116e-11	0.000242417
900	1.86931e-09	2.25854e-10	1.88212e-11	0.000124621
901	1.8123e-09	2.18965e-10	1.82471e-11	0.00012082
902	3.67073e-09	4.43505e-10	3.69588e-11	0.000244716
903	3.70358e-09	4.47473e-10	3.72894e-11	0.000246905
904	1.52889e-08	1.84724e-09	1.53937e-10	0.00101926
905	4.28801e-09	5.18085e-10	4.31738e-11	0.000285867
906	7.05478e-09	8.52373e-10	7.1031e-11	0.000470319
907	1.92969e-09	2.33149e-10	1.94291e-11	0.000128646
908	3.26506e-09	3.94491e-10	3.28742e-11	0.000217671
909	2.7345e-09	3.30387e-10	2.75323e-11	0.0001823
910	2.19289e-09	2.64949e-10	2.20791e-11	0.000146192
911	5.37943e-09	6.49953e-10	5.41627e-11	0.000358629
912	5.62526e-09	6.79655e-10	5.66379e-11	0.000375017
913	9.26997e-09	1.12002e-09	9.33346e-11	0.000617998
914	1.66229e-09	2.00841e-10	1.67368e-11	0.00011082
915	5.73188e-09	6.92537e-10	5.77114e-11	0.000382126
916	5.53292e-09	6.68498e-10	5.57081e-11	0.000368861
917	2.24697e-09	2.71483e-10	2.26236e-11	0.000149798
918	2.74157e-09	3.31241e-10	2.76034e-11	0.000182771
919	4.59868e-09	5.55621e-10	4.63018e-11	0.000306579
920	2.63778e-09	3.18701e-10	2.65584e-11	0.000175852
921	3.51381e-09	4.24545e-10	3.53788e-11	0.000234254
922	6.86248e-09	8.29139e-10	6.90949e-11	0.000457499
923	2.51224e-09	3.03534e-10	2.52945e-11	0.000167483
924	2.46001e-09	2.97223e-10	2.47686e-11	0.000164001
925	4.57222e-09	5.52424e-10	4.60353e-11	0.000304814
926	5.24157e-09	6.33297e-10	5.27747e-11	0.000349438
927	2.41652e-09	2.91969e-10	2.43308e-11	0.000161102
928	2.26308e-09	2.73429e-10	2.27858e-11	0.000150872
929	2.22297e-09	2.68583e-10	2.2382e-11	0.000148198
930	2.96685e-09	3.58461e-10	2.98718e-11	0.00019779
931	7.05429e-09	8.52313e-10	7.10261e-11	0.000470286
932	2.83272e-09	3.42255e-10	2.85213e-11	0.000188848
933	4.5688e-09	5.52011e-10	4.60009e-11	0.000304587
934	3.3766e-09	4.07968e-10	3.39973e-11	0.000225107
935	5.2329e-09	6.32249e-10	5.26875e-11	0.00034886
936	2.02811e-09	2.4504e-10	2.042e-11	0.000135207
937	3.14203e-09	3.79626e-10	3.16355e-11	0.000209468
938	3.49103e-09	4.21792e-10	3.51494e-11	0.000232735
939	3.25346e-09	3.93089e-10	3.27574e-11	0.000216897
940	2.27676e-09	2.75082e-10	2.29235e-11	0.000151784
941	6.3268e-09	7.64416e-10	6.37014e-11	0.000421787
942	3.51045e-09	4.24139e-10	3.53449e-11	0.00023403
943	1.55493e-08	1.8787e-09	1.56558e-10	0.00103662
944	4.13321e-09	4.99382e-10	4.16152e-11	0.000275547
945	7.68723e-09	9.28785e-10	7.73988e-11	0.000512482
946	4.81186e-09	5.81379e-10	4.84482e-11	0.000320791
947	9.36501e-09	1.1315e-09	9.42915e-11	0.000624334
948	2.05364e-09	2.48125e-10	2.06771e-11	0.00013691
949	5.58454e-09	6.74735e-10	5.62279e-11	0.000372303
950	4.76941e-09	5.76249e-10	4.80207e-11	0.00031796
951	5.60761e-09	6.77523e-10	5.64602e-11	0.000373841
952	3.39206e-09	4.09835e-10	3.41529e-11	0.000226137
953	5.05943e-09	6.1129e-10	5.09408e-11	0.000337295
954	2.52323e-09	3.04861e-10	2.54051e-11	0.000168215
955	4.90138e-09	5.92194e-10	4.93495e-11	0.000326759
956	4.50605e-09	5.4443e-10	4.53692e-11	0.000300403
957	2.90367e-09	3.50827e-10	2.92355e-11	0.000193578
958	2.89639e-09	3.49948e-10	2.91623e-11	0.000193093
959	5.43677e-09	6.5688e-10	5.474e-11	0.000362451
960	3.50598e-09	4.23599e-10	3.52999e-11	0.000233732
961	2.35768e-09	2.84859e-10	2.37382e-11	0.000157178
962	3.39706e-09	4.1044e-10	3.42033e-11	0.000226471
963	2.45158e-09	2.96205e-10	2.46837e-11	0.000163439
964	4.9732e-09	6.00872e-10	5.00727e-11	0.000331547
965	1.3214e-08	1.59654e-09	1.33045e-10	0.000880933
966	5.62814e-09	6.80002e-10	5.66669e-11	0.000375209
967	4.40767e-09	5.32543e-10	4.43786e-11	0.000293845
968	4.65807e-09	5.62797e-10	4.68997e-11	0.000310538
969	4.47556e-09	5.40745e-10	4.50621e-11	0.000298371
970	2.19467e-09	2.65164e-10	2.2097e-11	0.000146311
971	3.31762e-09	4.00841e-10	3.34035e-11	0.000221175
972	2.5458e-09	3.07589e-10	2.56324e-11	0.00016972
973	1.31042e-08	1.58327e-09	1.31939e-10	0.000873612
974	3.31163e-09	4.00117e-10	3.33431e-11	0.000220775
975	6.93671e-09	8.38107e-10	6.98423e-11	0.000462448
976	6.79908e-09	8.21478e-10	6.84565e-11	0.000453272
977	2.31174e-09	2.79309e-10	2.32757e-11	0.000154116
978	2.59027e-09	3.12962e-10	2.60801e-11	0.000172685
979	3.66488e-09	4.42797e-10	3.68998e-11	0.000244325
980	6.22958e-09	7.5267e-10	6.27225e-11	0.000415306
981	4.98426e-09	6.02208e-10	5.0184e-11	0.000332284
982	2.69322e-09	3.254e-10	2.71166e-11	0.000179548
983	3.34845e-09	4.04566e-10	3.37138e-11	0.00022323
984	2.92645e-09	3.53579e-10	2.94649e-11	0.000195097
985	6.32177e-09	7.63808e-10	6.36507e-11	0.000421451
986	1.35468e-09	1.63675e-10	1.36396e-11	9.03118e-05
987	3.38051e-09	4.0844e-10	3.40366e-11	0.000225367
988	9.5393e-09	1.15256e-09	9.60464e-11	0.000635953
989	4.34186e-09	5.24592e-10	4.3716e-11	0.000289457
990	3.41115e-09	4.12142e-10	3.43451e-11	0.00022741
991	5.16794e-09	6.244e-10	5.20334e-11	0.000344529
992	4.74518e-09	5.73322e-10	4.77768e-11	0.000316345
993	2.77185e-09	3.349e-10	2.79083e-11	0.00018479
994	3.80579e-09	4.59823e-10	3.83186e-11	0.00025372
995	3.466e-09	4.18769e-10	3.48974e-11	0.000231067
996	3.67675e-09	4.44232e-10	3.70193e-11	0.000245117
997	8.05266e-09	9.72938e-10	8.10782e-11	0.000536844
998	2.96268e-09	3.57956e-10	2.98297e-11	0.000197512
999	2.5155e-09	3.03927e-10	2.53273e-11	0.0001677
1000	1.54648e-08	1.86848e-09	1.55707e-10	0.00103098
1001	3.30491e-09	3.99305e-10	3.32754e-11	0.000220327
1002	2.30262e-09	2.78207e-10	2.31839e-11	0.000153508
1003	2.87132e-09	3.46918e-10	2.89099e-11	0.000191421
1004	5.40506e-09	6.5305e-10	5.44208e-11	0.000360338
1005	1.62607e-09	1.96465e-10	1.6372e-11	0.000108404
1006	3.18624e-09	3.84968e-10	3.20807e-11	0.000212416
1007	4.30771e-09	5.20466e-10	4.33722e-11	0.000287181
1008	3.99554e-09	4.82749e-10	4.02291e-11	0.00026637
1009	2.75337e-09	3.32668e-10	2.77223e-11	0.000183558
1010	1.04982e-09	1.26842e-10	1.05701e-11	6.99882e-05
1011	2.50257e-09	3.02365e-10	2.51971e-11	0.000166838
1012	6.21103e-09	7.50428e-10	6.25357e-11	0.000414068
1013	7.53825e-09	9.10786e-10	7.58989e-11	0.00050255
1014	4.46721e-09	5.39737e-10	4.49781e-11	0.000297814
1015	2.18761e-09	2.64311e-10	2.20259e-11	0.00014584
1016	6.12726e-09	7.40307e-10	6.16922e-11	0.000408484
1017	2.00473e-09	2.42216e-10	2.01847e-11	0.000133649
1018	1.44567e-09	1.74669e-10	1.45557e-11	9.6378e-05
1019	3.91269e-09	4.72739e-10	3.93949e-11	0.000260846
1020	2.3337e-09	2.81962e-10	2.34969e-11	0.00015558
1021	5.5802e-09	6.74211e-10	5.61842e-11	0.000372013
1022	3.98192e-09	4.81103e-10	4.00919e-11	0.000265461
1023	7.03477e-09	8.49954e-10	7.08295e-11	0.000468985
1024	3.46192e-09	4.18276e-10	3.48563e-11	0.000230795
1025	5.12075e-09	6.18699e-10	5.15583e-11	0.000341383
1026	4.88311e-09	5.89986e-10	4.91655e-11	0.00032554
1027	4.1758e-09	5.04528e-10	4.2044e-11	0.000278386
1028	2.5345e-09	3.06223e-10	2.55186e-11	0.000168967
1029	6.92596e-09	8.36808e-10	6.9734e-11	0.000461731
1030	3.12646e-09	3.77744e-10	3.14787e-11	0.00020843
1031	6.42517e-09	7.76301e-10	6.46918e-11	0.000428345
1032	9.3295e-09	1.12721e-09	9.3934e-11	0.000621967
1033	3.87638e-09	4.68352e-10	3.90293e-11	0.000258425
1034	3.62762e-09	4.38296e-10	3.65247e-11	0.000241841
1035	1.8562e-09	2.24269e-10	1.86891e-11	0.000123747
1036	6.5356e-09	7.89644e-10	6.58037e-11	0.000435707
1037	5.73332e-09	6.92711e-10	5.77259e-11	0.000382221
1038	2.09383e-09	2.5298e-10	2.10817e-11	0.000139588
1039	3.38113e-09	4.08514e-10	3.40429e-11	0.000225409
1040	3.96593e-09	4.79171e-10	3.99309e-11	0.000264395
1041	3.43327e-09	4.14815e-10	3.45679e-11	0.000228885
1042	1.33833e-09	1.617e-10	1.3475e-11	8.92223e-05
1043	4.10142e-09	4.95541e-10	4.12951e-11	0.000273428
1044	4.40127e-09	5.3177e-10	4.43142e-11	0.000293418
1045	5.30635e-09	6.41123e-10	5.34269e-11	0.000353756
1046	4.94031e-09	5.96898e-10	4.97415e-11	0.000329354
1047	4.0392e-09	4.88024e-10	4.06686e-11	0.00026928
1048	4.82033e-09	5.82402e-10	4.85335e-11	0.000321355
1049	1.06055e-08	1.28137e-09	1.06781e-10	0.000707031
1050	3.6851e-09	4.45241e-10	3.71034e-11	0.000245674
1051	3.58325e-09	4.32935e-10	3.60779e-11	0.000238883
1052	4.37333e-09	5.28394e-10	4.40328e-11	0.000291555
1053	4.89121e-09	5.90965e-10	4.92471e-11	0.000326081
1054	1.86264e-09	2.25047e-10	1.87539e-11	0.000124176
1055	5.16213e-09	6.23698e-10	5.19748e-11	0.000344142
1056	2.36689e-09	2.85972e-10	2.3831e-11	0.000157793
1057	3.02096e-09	3.64998e-10	3.04165e-11	0.000201397
1058	6.72364e-09	8.12363e-10	6.76969e-11	0.000448243
1059	6.82213e-09	8.24262e-10	6.86885e-11	0.000454808
1060	4.09272e-09	4.9449e-10	4.12075e-11	0.000272848
1061	3.60531e-09	4.35601e-10	3.63001e-11	0.000240354
1062	3.14865e-09	3.80426e-10	3.17021e-11	0.00020991
1063	4.45629e-09	5.38418e-10	4.48681e-11	0.000297086
1064	2.97324e-09	3.59233e-10	2.9936e-11	0.000198216
1065	3.49698e-09	4.22512e-10	3.52094e-11	0.000233132
1066	2.33712e-09	2.82375e-10	2.35313e-11	0.000155808
1067	5.76734e-09	6.96821e-10	5.80684e-11	0.000384489
1068	4.72363e-09	5.70718e-10	4.75598e-11	0.000314909
1069	3.9025e-09	4.71508e-10	3.92923e-11	0.000260167
1070	5.13716e-09	6.20681e-10	5.17234e-11	0.000342477
1071	5.20443e-09	6.28809e-10	5.24008e-11	0.000346962
1072	6.48902e-09	7.84016e-10	6.53347e-11	0.000432601
1073	1.83592e-09	2.21819e-10	1.84849e-11	0.000122394
1074	3.57248e-09	4.31633e-10	3.59695e-11	0.000238165
1075	2.11269e-09	2.5526e-10	2.12716e-11	0.000140846
1076	3.98674e-09	4.81685e-10	4.01404e-11	0.000265782
1077	2.89694e-09	3.50014e-10	2.91678e-11	0.000193129
1078	3.1155e-09	3.7642e-10	3.13684e-11	0.0002077
1079	4.6368e-09	5.60227e-10	4.66856e-11	0.00030912
1080	6.47971e-09	7.82891e-10	6.52409e-11	0.000431981
1081	4.99555e-09	6.03572e-10	5.02977e-11	0.000333037
1082	3.91467e-09	4.72978e-10	3.94148e-11	0.000260978
1083	2.64029e-09	3.19005e-10	2.65837e-11	0.000176019
1084	1.31687e-08	1.59107e-09	1.32589e-10	0.000877915
1085	2.38771e-09	2.88488e-10	2.40406e-11	0.000159181
1086	2.81089e-09	3.39617e-10	2.83014e-11	0.000187393
1087	4.67422e-09	5.64748e-10	4.70623e-11	0.000311614
1088	9.24339e-09	1.1168e-09	9.3067e-11	0.000616226
1089	5.53411e-09	6.68642e-10	5.57202e-11	0.000368941
1090	2.14498e-09	2.5916e-10	2.15967e-11	0.000142999
1091	4.03981e-09	4.88098e-10	4.06748e-11	0.000269321
1092	4.96084e-09	5.99378e-10	4.99482e-11	0.000330723
1093	2.77098e-09	3.34795e-10	2.78995e-11	0.000184732
1094	5.0226e-09	6.0684e-10	5.057e-11	0.00033484
1095	2.41108e-09	2.91311e-10	2.42759e-11	0.000160738
1096	3.05539e-09	3.69158e-10	3.07631e-11	0.000203692
1097	3.63036e-09	4.38627e-10	3.65523e-11	0.000242024
1098	5.77482e-09	6.97725e-10	5.81438e-11	0.000384988
1099	3.13731e-09	3.79056e-10	3.1588e-11	0.000209154
1100	3.57792e-09	4.32292e-10	3.60243e-11	0.000238528
1101	4.8522e-09	5.86252e-10	4.88543e-11	0.00032348
1102	3.29356e-09	3.97934e-10	3.31611e-11	0.00021957
1103	1.22246e-08	1.477e-09	1.23084e-10	0.000814975
1104	3.31087e-09	4.00025e-10	3.33354e-11	0.000220724
1105	3.80126e-09	4.59276e-10	3.8273e-11	0.000253418
1106	3.81069e-09	4.60415e-10	3.83679e-11	0.000254046
1107	4.83891e-09	5.84647e-10	4.87206e-11	0.000322594
1108	1.16483e-08	1.40737e-09	1.17281e-10	0.000776551
1109	2.98111e-09	3.60184e-10	3.00153e-11	0.000198741
1110	5.47283e-09	6.61237e-10	5.51031e-11	0.000364855
1111	3.14385e-09	3.79846e-10	3.16539e-11	0.00020959
1112	6.30329e-09	7.61576e-10	6.34647e-11	0.00042022
1113	2.85997e-09	3.45547e-10	2.87956e-11	0.000190664
1114	4.16659e-09	5.03415e-10	4.19513e-11	0.000277773
1115	4.29919e-09	5.19436e-10	4.32863e-11	0.000286612
1116	2.1777e-09	2.63114e-10	2.19261e-11	0.00014518
1117	3.62885e-09	4.38445e-10	3.65371e-11	0.000241923
1118	3.92034e-09	4.73663e-10	3.94719e-11	0.000261356
1119	3.81189e-09	4.6056e-10	3.838e-11	0.000254126
1120	2.79919e-09	3.38204e-10	2.81837e-11	0.000186613
1121	3.57974e-09	4.32511e-10	3.60426e-11	0.000238649
1122	5.97453e-09	7.21854e-10	6.01545e-11	0.000398302
1123	3.60068e-09	4.35041e-10	3.62534e-11	0.000240045
1124	4.17256e-09	5.04137e-10	4.20114e-11	0.000278171
1125	5.05218e-09	6.10414e-10	5.08679e-11	0.000336812
1126	2.32978e-09	2.81489e-10	2.34574e-11	0.000155319
1127	5.77731e-09	6.98026e-10	5.81688e-11	0.000385154
1128	3.83815e-09	4.63733e-10	3.86444e-11	0.000255877
1129	4.12267e-09	4.98109e-10	4.15091e-11	0.000274845
1130	2.44989e-09	2.96001e-10	2.46667e-11	0.000163326
1131	2.69084e-09	3.25112e-10	2.70927e-11	0.000179389
1132	4.26828e-09	5.15702e-10	4.29751e-11	0.000284552
1133	6.73756e-09	8.14044e-10	6.7837e-11	0.00044917
1134	5.9455e-09	7.18347e-10	5.98622e-11	0.000396367
1135	7.83577e-09	9.46732e-10	7.88944e-11	0.000522384
1136	3.97958e-09	4.8082e-10	4.00683e-11	0.000265305
1137	3.86952e-09	4.67523e-10	3.89602e-11	0.000257968
1138	2.43593e-09	2.94314e-10	2.45262e-11	0.000162395
1139	5.42573e-09	6.55547e-10	5.46289e-11	0.000361715
1140	6.02227e-09	7.27622e-10	6.06351e-11	0.000401484
1141	3.00371e-09	3.62914e-10	3.02428e-11	0.000200247
1142	3.60449e-09	4.35501e-10	3.62918e-11	0.000240299
1143	6.45819e-09	7.80291e-10	6.50242e-11	0.000430546
1144	2.57936e-09	3.11643e-10	2.59703e-11	0.000171957
1145	3.30359e-09	3.99146e-10	3.32622e-11	0.000220239
1146	1.87852e-09	2.26967e-10	1.89139e-11	0.000125235
1147	6.91587e-09	8.35589e-10	6.96324e-11	0.000461058
1148	3.67102e-09	4.4354e-10	3.69617e-11	0.000244735
1149	5.69563e-09	6.88157e-10	5.73465e-11	0.000379709
1150	6.21786e-09	7.51253e-10	6.26044e-11	0.000414524
1151	2.33096e-09	2.81631e-10	2.34692e-11	0.000155397
1152	2.5349e-09	3.06271e-10	2.55226e-11	0.000168993
1153	8.94802e-09	1.08112e-09	9.00931e-11	0.000596535
1154	2.13413e-09	2.5785e-10	2.14875e-11	0.000142275
1155	5.46175e-09	6.59899e-10	5.49916e-11	0.000364116
1156	9.11176e-09	1.1009e-09	9.17417e-11	0.000607451
1157	4.62596e-09	5.58917e-10	4.65764e-11	0.000308397
1158	2.23568e-09	2.70119e-10	2.251e-11	0.000149046
1159	6.61244e-09	7.98928e-10	6.65773e-11	0.000440829
1160	6.799e-09	8.21468e-10	6.84557e-11	0.000453267
1161	8.31911e-09	1.00513e-09	8.37609e-11	0.000554608
1162	3.9603e-09	4.78491e-10	3.98742e-11	0.00026402
1163	4.88875e-09	5.90668e-10	4.92223e-11	0.000325916
1164	1.74767e-09	2.11157e-10	1.75964e-11	0.000116511
1165	5.41126e-09	6.53799e-10	5.44832e-11	0.000360751
1166	3.57439e-09	4.31865e-10	3.59888e-11	0.000238293
1167	3.93923e-09	4.75946e-10	3.96621e-11	0.000262615
1168	6.21621e-09	7.51055e-10	6.25879e-11	0.000414414
1169	4.54167e-09	5.48734e-10	4.57278e-11	0.000302778
1170	3.54461e-09	4.28267e-10	3.56889e-11	0.000236308
1171	6.31882e-09	7.63452e-10	6.3621e-11	0.000421255
1172	2.8891e-09	3.49067e-10	2.90889e-11	0.000192607
1173	1.1422e-08	1.38003e-09	1.15002e-10	0.000761468
1174	4.53297e-09	5.47682e-10	4.56402e-11	0.000302198
1175	1.19786e-08	1.44728e-09	1.20607e-10	0.000798576
1176	1.00738e-08	1.21714e-09	1.01428e-10	0.000671588
1177	4.20061e-09	5.07526e-10	4.22938e-11	0.000280041
1178	4.36367e-09	5.27227e-10	4.39356e-11	0.000290912
1179	2.27949e-09	2.75412e-10	2.2951e-11	0.000151966
1180	5.70431e-09	6.89206e-10	5.74338e-11	0.000380288
1181	4.0893e-09	4.94077e-10	4.1173e-11	0.00027262
1182	4.89573e-09	5.91511e-10	4.92926e-11	0.000326382
1183	4.39294e-09	5.30763e-10	4.42303e-11	0.000292862
1184	4.76664e-09	5.75914e-10	4.79929e-11	0.000317776
1185	3.14194e-09	3.79616e-10	3.16346e-11	0.000209463
1186	2.60988e-09	3.15331e-10	2.62776e-11	0.000173992
1187	3.76375e-09	4.54744e-10	3.78953e-11	0.000250917
1188	4.41158e-09	5.33016e-10	4.4418e-11	0.000294106
1189	3.28443e-09	3.96831e-10	3.30693e-11	0.000218962
1190	4.34808e-09	5.25344e-10	4.37787e-11	0.000289872
1191	2.04809e-09	2.47455e-10	2.06212e-11	0.00013654
1192	3.91762e-09	4.73334e-10	3.94445e-11	0.000261174
1193	3.66437e-09	4.42736e-10	3.68947e-11	0.000244291
1194	4.44198e-09	5.36688e-10	4.4724e-11	0.000296132
1195	4.68679e-09	5.66266e-10	4.71889e-11	0.000312452
1196	1.15005e-08	1.38952e-09	1.15793e-10	0.000766703
1197	3.00308e-09	3.62838e-10	3.02365e-11	0.000200205
1198	4.13876e-09	5.00053e-10	4.16711e-11	0.000275918
1199	1.40594e-08	1.69869e-09	1.41557e-10	0.000937296
1200	3.01008e-09	3.63683e-10	3.03069e-11	0.000200672
1201	4.39338e-09	5.30816e-10	4.42347e-11	0.000292892
1202	4.41656e-09	5.33617e-10	4.44681e-11	0.000294437
1203	3.24468e-09	3.92029e-10	3.2669e-11	0.000216312
1204	4.001e-09	4.83409e-10	4.0284e-11	0.000266733
1205	5.36382e-09	6.48067e-10	5.40056e-11	0.000357588
1206	7.4188e-09	8.96354e-10	7.46962e-11	0.000494587
1207	1.66406e-09	2.01054e-10	1.67545e-11	0.000110937
1208	4.01122e-09	4.84643e-10	4.03869e-11	0.000267414
1209	2.01479e-08	2.43431e-09	2.02859e-10	0.00134319
1210	5.79445e-09	7.00096e-10	5.83414e-11	0.000386297
1211	2.64359e-09	3.19404e-10	2.6617e-11	0.00017624
1212	1.02793e-08	1.24196e-09	1.03497e-10	0.000685285
1213	8.55739e-09	1.03392e-09	8.616e-11	0.000570493
1214	1.16764e-08	1.41076e-09	1.17564e-10	0.000778425
1215	6.60109e-09	7.97557e-10	6.64631e-11	0.000440073
1216	2.49187e-09	3.01073e-10	2.50894e-11	0.000166125
1217	1.02073e-08	1.23327e-09	1.02772e-10	0.000680487
1218	2.08569e-09	2.51997e-10	2.09997e-11	0.000139046
1219	2.46052e-09	2.97285e-10	2.47738e-11	0.000164035
1220	2.84305e-09	3.43503e-10	2.86253e-11	0.000189537
1221	4.24762e-09	5.13205e-10	4.27671e-11	0.000283175
1222	2.24828e-09	2.71641e-10	2.26368e-11	0.000149885
1223	3.20053e-09	3.86694e-10	3.22245e-11	0.000213368
1224	6.77832e-09	8.1897e-10	6.82475e-11	0.000451888
1225	3.48044e-09	4.20513e-10	3.50427e-11	0.000232029
1226	5.96194e-09	7.20333e-10	6.00278e-11	0.000397463
1227	4.57105e-09	5.52282e-10	4.60235e-11	0.000304736
1228	3.88332e-09	4.69191e-10	3.90992e-11	0.000258888
1229	4.4876e-09	5.422e-10	4.51834e-11	0.000299173
1230	2.06087e-09	2.48998e-10	2.07498e-11	0.000137391
1231	7.96072e-09	9.61829e-10	8.01525e-11	0.000530715
1232	2.84569e-09	3.43821e-10	2.86518e-11	0.000189712
1233	3.6187e-09	4.37218e-10	3.64348e-11	0.000241246
1234	3.42041e-09	4.1326e-10	3.44383e-11	0.000228027
1235	3.09188e-09	3.73567e-10	3.11306e-11	0.000206125
1236	4.41451e-09	5.3337e-10	4.44475e-11	0.000294301
1237	3.24156e-09	3.91651e-10	3.26376e-11	0.000216104
1238	9.70361e-10	1.17241e-10	9.77007e-12	6.46907e-05
1239	2.46286e-09	2.97567e-10	2.47973e-11	0.00016419
1240	3.49285e-09	4.22012e-10	3.51677e-11	0.000232856
1241	9.33863e-09	1.12831e-09	9.40259e-11	0.000622575
1242	7.40446e-09	8.94621e-10	7.45517e-11	0.000493631
1243	3.37191e-09	4.07401e-10	3.39501e-11	0.000224794
1244	5.45234e-09	6.58762e-10	5.48969e-11	0.000363489
1245	3.22633e-09	3.89811e-10	3.24843e-11	0.000215089
1246	5.84136e-09	7.05764e-10	5.88137e-11	0.000389424
1247	3.72924e-09	4.50574e-10	3.75478e-11	0.000248616
1248	5.23161e-09	6.32093e-10	5.26744e-11	0.000348774
1249	8.45686e-09	1.02177e-09	8.51479e-11	0.000563791
1250	4.62193e-09	5.58431e-10	4.65359e-11	0.000308129
1251	4.9956e-09	6.03578e-10	5.02982e-11	0.00033304
1252	8.13321e-09	9.82669e-10	8.18891e-11	0.000542214
1253	2.22861e-09	2.69266e-10	2.24388e-11	0.000148574
1254	5.26795e-09	6.36484e-10	5.30404e-11	0.000351197
1255	1.01092e-08	1.22141e-09	1.01784e-10	0.000673947
1256	6.46076e-09	7.80602e-10	6.50501e-11	0.000430717
1257	4.2666e-09	5.15499e-10	4.29582e-11	0.00028444
1258	7.77677e-09	9.39604e-10	7.83004e-11	0.000518451
1259	4.08108e-09	4.93084e-10	4.10903e-11	0.000272072
1260	2.21039e-09	2.67064e-10	2.22553e-11	0.000147359
1261	2.31651e-09	2.79886e-10	2.33238e-11	0.000154434
1262	3.41228e-09	4.12278e-10	3.43565e-11	0.000227485
1263	2.43302e-09	2.93963e-10	2.44969e-11	0.000162202
1264	7.45724e-09	9.00998e-10	7.50832e-11	0.00049715
1265	3.59521e-09	4.34381e-10	3.61984e-11	0.000239681
1266	5.10071e-09	6.16278e-10	5.13565e-11	0.000340047
1267	1.88724e-09	2.2802e-10	1.90016e-11	0.000125816
1268	6.95503e-09	8.4032e-10	7.00267e-11	0.000463669
1269	1.18348e-09	1.4299e-10	1.19158e-11	7.88983e-05
1270	2.64316e-09	3.19352e-10	2.66127e-11	0.000176211
1271	3.36845e-09	4.06983e-10	3.39152e-11	0.000224564
1272	3.22941e-09	3.90183e-10	3.25152e-11	0.000215294
1273	3.79065e-09	4.57994e-10	3.81662e-11	0.00025271
1274	2.71041e-09	3.27476e-10	2.72897e-11	0.000180694
1275	1.18896e-08	1.43653e-09	1.1971e-10	0.000792641
1276	4.17316e-09	5.04209e-10	4.20174e-11	0.00027821
1277	4.39936e-09	5.3154e-10	4.4295e-11	0.000293291
1278	1.84615e-09	2.23055e-10	1.85879e-11	0.000123076
1279	3.22878e-09	3.90107e-10	3.2509e-11	0.000215252
1280	5.94608e-09	7.18416e-10	5.9868e-11	0.000396405
1281	4.24319e-09	5.12671e-10	4.27226e-11	0.00028288
1282	6.34329e-09	7.66408e-10	6.38674e-11	0.000422886
1283	4.48697e-09	5.42124e-10	4.5177e-11	0.000299131
1284	2.89101e-09	3.49298e-10	2.91082e-11	0.000192734
1285	1.32868e-08	1.60533e-09	1.33778e-10	0.000885785
1286	3.78132e-09	4.56866e-10	3.80722e-11	0.000252088
1287	2.70051e-09	3.26281e-10	2.71901e-11	0.000180034
1288	5.3847e-09	6.5059e-10	5.42159e-11	0.00035898
1289	3.01475e-09	3.64248e-10	3.0354e-11	0.000200983
1290	3.18437e-09	3.84741e-10	3.20618e-11	0.000212291
1291	3.40878e-09	4.11855e-10	3.43213e-11	0.000227252
1292	3.16298e-09	3.82158e-10	3.18465e-11	0.000210866
1293	4.48818e-09	5.42271e-10	4.51892e-11	0.000299212
1294	3.76906e-09	4.55385e-10	3.79488e-11	0.000251271
1295	7.06968e-09	8.54172e-10	7.1181e-11	0.000471312
1296	2.58114e-09	3.11858e-10	2.59881e-11	0.000172076
1297	2.82179e-09	3.40934e-10	2.84112e-11	0.000188119
1298	3.02294e-09	3.65237e-10	3.04364e-11	0.000201529
1299	3.37156e-09	4.07358e-10	3.39465e-11	0.00022477
1300	2.30641e-09	2.78665e-10	2.32221e-11	0.000153761
1301	2.33691e-09	2.8235e-10	2.35292e-11	0.000155794
1302	3.38631e-09	4.0914e-10	3.4095e-11	0.000225754
1303	4.90351e-09	5.92452e-10	4.9371e-11	0.000326901
1304	4.74606e-09	5.73428e-10	4.77856e-11	0.000316404
1305	7.22765e-09	8.73259e-10	7.27715e-11	0.000481843
1306	5.34189e-09	6.45417e-10	5.37848e-11	0.000356126
1307	6.09019e-09	7.35829e-10	6.13191e-11	0.000406013
1308	5.189e-09	6.26944e-10	5.22454e-11	0.000345933
1309	3.43511e-09	4.15036e-10	3.45863e-11	0.000229007
1310	4.0841e-09	4.93449e-10	4.11208e-11	0.000272274
1311	8.93911e-09	1.08004e-09	9.00034e-11	0.000595941
1312	5.81683e-09	7.028e-10	5.85667e-11	0.000387789
1313	5.11848e-09	6.18425e-10	5.15354e-11	0.000341232
1314	1.81725e-08	2.19564e-09	1.8297e-10	0.0012115
1315	3.80747e-09	4.60025e-10	3.83354e-11	0.000253831
1316	6.46365e-09	7.8095e-10	6.50792e-11	0.00043091
1317	2.66457e-09	3.21938e-10	2.68282e-11	0.000177638
1318	2.64207e-09	3.1922e-10	2.66017e-11	0.000176138
1319	2.5298e-09	3.05655e-10	2.54713e-11	0.000168653
1320	4.26411e-09	5.15197e-10	4.29331e-11	0.000284274
1321	1.86541e-09	2.25382e-10	1.87818e-11	0.00012436
1322	4.66222e-09	5.63298e-10	4.69415e-11	0.000310815
1323	1.68966e-09	2.04148e-10	1.70123e-11	0.000112644
1324	1.57311e-08	1.90066e-09	1.58388e-10	0.00104874
1325	3.26004e-09	3.93884e-10	3.28237e-11	0.000217336
1326	3.27994e-09	3.96289e-10	3.30241e-11	0.000218663
1327	1.17605e-08	1.42093e-09	1.18411e-10	0.000784036
1328	3.58489e-09	4.33133e-10	3.60945e-11	0.000238993
1329	3.23925e-09	3.91373e-10	3.26144e-11	0.00021595
1330	5.76449e-09	6.96476e-10	5.80397e-11	0.000384299
1331	3.88308e-09	4.69161e-10	3.90968e-11	0.000258872
1332	6.69699e-09	8.09143e-10	6.74286e-11	0.000446466
1333	6.17149e-09	7.45652e-10	6.21377e-11	0.000411433
1334	3.21095e-09	3.87953e-10	3.23294e-11	0.000214063
1335	2.98489e-09	3.6064e-10	3.00533e-11	0.000198992
1336	2.2342e-09	2.69941e-10	2.2495e-11	0.000148947
1337	3.55446e-09	4.29457e-10	3.57881e-11	0.000236964
1338	3.39968e-09	4.10756e-10	3.42297e-11	0.000226646
1339	4.28422e-09	5.17628e-10	4.31356e-11	0.000285615
1340	3.55977e-09	4.30098e-10	3.58415e-11	0.000237318
1341	4.93423e-09	5.96163e-10	4.96803e-11	0.000328949
1342	4.10393e-09	4.95845e-10	4.13204e-11	0.000273595
1343	4.04492e-09	4.88716e-10	4.07263e-11	0.000269662
1344	4.45971e-09	5.3883e-10	4.49025e-11	0.000297314
1345	4.70504e-09	5.68472e-10	4.73726e-11	0.000313669
1346	2.49822e-09	3.0184e-10	2.51533e-11	0.000166548
1347	5.6839e-09	6.8674e-10	5.72283e-11	0.000378927
1348	3.72003e-09	4.49461e-10	3.74551e-11	0.000248002
1349	1.79185e-09	2.16495e-10	1.80412e-11	0.000119457
1350	4.55389e-09	5.50209e-10	4.58508e-11	0.000303593
1351	4.64539e-09	5.61265e-10	4.67721e-11	0.000309693
1352	2.7224e-09	3.28926e-10	2.74105e-11	0.000181494
1353	6.13407e-09	7.4113e-10	6.17608e-11	0.000408938
1354	3.00965e-09	3.63631e-10	3.03026e-11	0.000200643
1355	6.60076e-09	7.97517e-10	6.64597e-11	0.000440051
1356	3.63193e-09	4.38817e-10	3.65681e-11	0.000242129
1357	4.92291e-09	5.94795e-10	4.95663e-11	0.000328194
1358	9.67994e-09	1.16955e-09	9.74624e-11	0.000645329
1359	4.78924e-09	5.78645e-10	4.82204e-11	0.000319283
1360	4.05484e-09	4.89913e-10	4.08261e-11	0.000270323
1361	1.98326e-09	2.39621e-10	1.99684e-11	0.000132217
1362	3.75595e-09	4.53801e-10	3.78167e-11	0.000250396
1363	4.089e-09	4.94041e-10	4.11701e-11	0.0002726
1364	5.10371e-09	6.1664e-10	5.13867e-11	0.000340247
1365	2.6568e-09	3.20999e-10	2.67499e-11	0.00017712
1366	9.78907e-09	1.18273e-09	9.85612e-11	0.000652605
1367	3.07405e-09	3.71412e-10	3.0951e-11	0.000204936
1368	2.67949e-09	3.23741e-10	2.69784e-11	0.000178633
1369	9.05328e-09	1.09383e-09	9.11529e-11	0.000603552
1370	1.80019e-09	2.17502e-10	1.81252e-11	0.000120012
1371	3.43698e-09	4.15262e-10	3.46052e-11	0.000229132
1372	2.70625e-09	3.26974e-10	2.72478e-11	0.000180416
1373	4.07513e-09	4.92365e-10	4.10304e-11	0.000271675
1374	4.57015e-09	5.52175e-10	4.60146e-11	0.000304677
1375	7.78242e-09	9.40286e-10	7.83572e-11	0.000518828
1376	5.63587e-09	6.80937e-10	5.67447e-11	0.000375725
1377	4.91741e-09	5.94131e-10	4.9511e-11	0.000327828
1378	1.58382e-09	1.9136e-10	1.59466e-11	0.000105588
1379	3.55972e-09	4.30092e-10	3.5841e-11	0.000237315
1380	3.31662e-09	4.0072e-10	3.33934e-11	0.000221108
1381	3.33561e-09	4.03015e-10	3.35846e-11	0.000222374
1382	4.821e-09	5.82482e-10	4.85402e-11	0.0003214
1383	4.51166e-09	5.45108e-10	4.54257e-11	0.000300778
1384	7.24107e-09	8.74879e-10	7.29066e-11	0.000482738
1385	2.40012e-09	2.89988e-10	2.41656e-11	0.000160008
1386	4.97849e-09	6.01511e-10	5.01259e-11	0.0003319
1387	2.4888e-09	3.00702e-10	2.50585e-11	0.00016592
1388	4.79288e-09	5.79085e-10	4.82571e-11	0.000319525
1389	3.72094e-09	4.49571e-10	3.74642e-11	0.000248063
1390	2.38736e-09	2.88446e-10	2.40371e-11	0.000159157
1391	6.40527e-09	7.73897e-10	6.44914e-11	0.000427018
1392	4.79561e-09	5.79415e-10	4.82846e-11	0.000319708
1393	3.0751e-09	3.7154e-10	3.09617e-11	0.000205007
1394	3.87649e-09	4.68365e-10	3.90304e-11	0.000258432
1395	4.40956e-09	5.32771e-10	4.43976e-11	0.00029397
1396	3.17917e-09	3.84113e-10	3.20094e-11	0.000211944
1397	2.20449e-09	2.66351e-10	2.21959e-11	0.000146966
1398	3.56255e-09	4.30434e-10	3.58695e-11	0.000237503
1399	1.33905e-08	1.61787e-09	1.34822e-10	0.0008927
1400	2.951e-09	3.56545e-10	2.97121e-11	0.000196733
1401	6.24623e-09	7.54682e-10	6.28901e-11	0.000416415
1402	4.03774e-09	4.87848e-10	4.0654e-11	0.000269183
1403	3.69196e-09	4.4607e-10	3.71725e-11	0.000246131
1404	2.27095e-09	2.74381e-10	2.28651e-11	0.000151397
1405	5.03955e-09	6.08888e-10	5.07406e-11	0.00033597
1406	2.59755e-09	3.1384e-10	2.61534e-11	0.00017317
1407	1.95182e-09	2.35823e-10	1.96519e-11	0.000130121
1408	6.29392e-09	7.60444e-10	6.33703e-11	0.000419595
1409	7.84469e-09	9.4781e-10	7.89842e-11	0.000522979
1410	4.22807e-09	5.10843e-10	4.25703e-11	0.000281871
1411	2.01708e-09	2.43708e-10	2.0309e-11	0.000134472
1412	4.10077e-09	4.95462e-10	4.12885e-11	0.000273384
1413	7.38109e-09	8.91798e-10	7.43165e-11	0.000492073
1414	2.89276e-09	3.49509e-10	2.91258e-11	0.000192851
1415	6.1281e-09	7.40409e-10	6.17008e-11	0.00040854
1416	8.41011e-09	1.01613e-09	8.46771e-11	0.000560674
1417	4.28652e-09	5.17906e-10	4.31588e-11	0.000285768
1418	5.54634e-09	6.70119e-10	5.58433e-11	0.000369756
1419	4.68538e-09	5.66096e-10	4.71747e-11	0.000312359
1420	8.2352e-09	9.94993e-10	8.29161e-11	0.000549013
1421	4.5078e-09	5.44641e-10	4.53867e-11	0.00030052
1422	3.09222e-09	3.73608e-10	3.1134e-11	0.000206148
1423	1.55204e-09	1.8752e-10	1.56267e-11	0.000103469
1424	2.99508e-09	3.61871e-10	3.01559e-11	0.000199672
1425	3.18983e-09	3.85402e-10	3.21168e-11	0.000212655
1426	4.15785e-09	5.0236e-10	4.18633e-11	0.00027719
1427	3.63424e-09	4.39096e-10	3.65914e-11	0.000242283
1428	5.34566e-09	6.45873e-10	5.38228e-11	0.000356377
1429	9.84013e-09	1.1889e-09	9.90753e-11	0.000656009
1430	3.34456e-09	4.04096e-10	3.36747e-11	0.00022297
1431	5.35079e-09	6.46492e-10	5.38744e-11	0.000356719
1432	2.79499e-09	3.37696e-10	2.81414e-11	0.000186333
1433	3.85025e-09	4.65194e-10	3.87662e-11	0.000256683
1434	3.65906e-09	4.42095e-10	3.68412e-11	0.000243938
1435	3.02257e-09	3.65193e-10	3.04327e-11	0.000201505
1436	1.23549e-08	1.49274e-09	1.24395e-10	0.000823659
1437	3.13716e-09	3.79038e-10	3.15865e-11	0.000209144
1438	3.88656e-09	4.69581e-10	3.91318e-11	0.000259104
1439	4.23859e-09	5.12115e-10	4.26762e-11	0.000282573
1440	3.87402e-09	4.68067e-10	3.90056e-11	0.000258268
1441	4.4344e-09	5.35772e-10	4.46477e-11	0.000295626
1442	3.7031e-09	4.47415e-10	3.72846e-11	0.000246873
1443	2.55314e-09	3.08475e-10	2.57063e-11	0.000170209
1444	1.89679e-09	2.29174e-10	1.90978e-11	0.000126453
1445	3.87315e-09	4.67961e-10	3.89967e-11	0.00025821
1446	2.67641e-09	3.23369e-10	2.69475e-11	0.000178428
1447	4.94303e-09	5.97226e-10	4.97689e-11	0.000329535
1448	6.6835e-09	8.07513e-10	6.72927e-11	0.000445566
1449	1.32095e-08	1.596e-09	1.33e-10	0.000880634
1450	8.12738e-09	9.81965e-10	8.18304e-11	0.000541825
1451	2.04279e-09	2.46813e-10	2.05678e-11	0.000136186
1452	3.86359e-09	4.66806e-10	3.89005e-11	0.000257573
1453	3.00864e-09	3.6351e-10	3.02925e-11	0.000200576
1454	5.44442e-09	6.57805e-10	5.48171e-11	0.000362961
1455	2.14315e-09	2.5894e-10	2.15783e-11	0.000142877
1456	4.76508e-09	5.75726e-10	4.79771e-11	0.000317672
1457	5.31547e-09	6.42226e-10	5.35188e-11	0.000354365
1458	7.24571e-09	8.75441e-10	7.29534e-11	0.000483048
1459	2.68195e-09	3.24038e-10	2.70032e-11	0.000178796
1460	6.04443e-09	7.30299e-10	6.08583e-11	0.000402962
1461	4.60812e-09	5.56762e-10	4.63969e-11	0.000307208
1462	2.6228e-09	3.16891e-10	2.64076e-11	0.000174853
1463	2.20752e-09	2.66716e-10	2.22264e-11	0.000147168
1464	2.03261e-09	2.45584e-10	2.04653e-11	0.000135507
1465	5.29606e-09	6.3988e-10	5.33234e-11	0.000353071
1466	3.55761e-09	4.29837e-10	3.58197e-11	0.000237174
1467	5.09972e-09	6.16158e-10	5.13465e-11	0.000339981
1468	4.83987e-09	5.84763e-10	4.87302e-11	0.000322658
1469	5.16743e-09	6.24338e-10	5.20282e-11	0.000344495
1470	3.23455e-09	3.90804e-10	3.2567e-11	0.000215637
1471	5.03648e-09	6.08518e-10	5.07098e-11	0.000335766
1472	2.58095e-09	3.11835e-10	2.59863e-11	0.000172063
1473	6.91554e-09	8.35549e-10	6.96291e-11	0.000461036
1474	2.64746e-09	3.19871e-10	2.66559e-11	0.000176497
1475	2.577e-09	3.11358e-10	2.59465e-11	0.0001718
1476	4.64828e-09	5.61615e-10	4.68012e-11	0.000309886
1477	4.68851e-09	5.66475e-10	4.72063e-11	0.000312568
1478	5.21305e-09	6.2985e-10	5.24875e-11	0.000347536
1479	4.41261e-09	5.3314e-10	4.44283e-11	0.000294174
1480	3.57992e-09	4.32533e-10	3.60444e-11	0.000238661
1481	5.95566e-09	7.19574e-10	5.99645e-11	0.000397044
1482	9.84946e-09	1.19003e-09	9.91693e-11	0.000656631
1483	6.76871e-09	8.17808e-10	6.81507e-11	0.000451247
1484	5.42714e-09	6.55718e-10	5.46432e-11	0.00036181
1485	7.65875e-09	9.25345e-10	7.71121e-11	0.000510583
1486	4.20908e-09	5.0855e-10	4.23791e-11	0.000280606
1487	7.28127e-09	8.79737e-10	7.33115e-11	0.000485418
1488	8.32724e-09	1.00611e-09	8.38428e-11	0.000555149
1489	5.67741e-09	6.85956e-10	5.7163e-11	0.000378494
1490	3.24988e-09	3.92657e-10	3.27214e-11	0.000216659
1491	4.41063e-09	5.32901e-10	4.44084e-11	0.000294042
1492	2.70983e-09	3.27406e-10	2.72839e-11	0.000180655
1493	6.91681e-09	8.35703e-10	6.96419e-11	0.000461121
1494	2.20875e-09	2.66865e-10	2.22387e-11	0.00014725
1495	2.88596e-09	3.48688e-10	2.90573e-11	0.000192398
1496	2.99103e-09	3.61382e-10	3.01152e-11	0.000199402
1497	3.88435e-09	4.69315e-10	3.91095e-11	0.000258957
1498	4.02557e-09	4.86377e-10	4.05314e-11	0.000268371
1499	2.28382e-09	2.75936e-10	2.29946e-11	0.000152255
1500	1.08077e-08	1.30581e-09	1.08817e-10	0.000720513
1501	3.51025e-09	4.24115e-10	3.53429e-11	0.000234017
1502	7.03171e-09	8.49585e-10	7.07988e-11	0.000468781
1503	5.98207e-09	7.22766e-10	6.02305e-11	0.000398805
1504	2.90236e-09	3.50669e-10	2.92224e-11	0.000193491
1505	3.16129e-09	3.81953e-10	3.18294e-11	0.000210752
1506	3.6459e-09	4.40505e-10	3.67087e-11	0.00024306
1507	1.22501e-08	1.48008e-09	1.2334e-10	0.000816672
1508	5.18592e-09	6.26573e-10	5.22144e-11	0.000345728
1509	3.93664e-09	4.75632e-10	3.9636e-11	0.000262442
1510	2.52247e-09	3.0477e-10	2.53975e-11	0.000168165
1511	2.48251e-09	2.99941e-10	2.49951e-11	0.0001655
1512	2.79159e-09	3.37285e-10	2.81071e-11	0.000186106
1513	4.61968e-09	5.58159e-10	4.65132e-11	0.000307979
1514	4.50441e-09	5.44232e-10	4.53527e-11	0.000300294
1515	3.79278e-09	4.5825e-10	3.81875e-11	0.000252852
1516	2.89324e-09	3.49567e-10	2.91306e-11	0.000192883
1517	8.73159e-09	1.05497e-09	8.79139e-11	0.000582106
1518	4.57419e-09	5.52663e-10	4.60552e-11	0.000304946
1519	3.11172e-09	3.75965e-10	3.13304e-11	0.000207448
1520	3.85172e-09	4.65372e-10	3.8781e-11	0.000256781
1521	5.46408e-09	6.60181e-10	5.50151e-11	0.000364272
1522	3.71939e-09	4.49384e-10	3.74486e-11	0.000247959
1523	2.04984e-09	2.47666e-10	2.06388e-11	0.000136656
1524	2.03651e-09	2.46056e-10	2.05046e-11	0.000135768
1525	3.5747e-09	4.31902e-10	3.59918e-11	0.000238313
1526	4.31201e-09	5.20986e-10	4.34155e-11	0.000287468
1527	4.26376e-09	5.15156e-10	4.29296e-11	0.000284251
1528	3.64595e-09	4.40511e-10	3.67092e-11	0.000243063
1529	1.71733e-09	2.07491e-10	1.72909e-11	0.000114489
1530	3.05194e-09	3.68741e-10	3.07284e-11	0.000203463
1531	4.5505e-09	5.498e-10	4.58167e-11	0.000303367
1532	3.31567e-09	4.00605e-10	3.33838e-11	0.000221044
1533	3.3507e-09	4.04838e-10	3.37365e-11	0.00022338
1534	4.14802e-09	5.01172e-10	4.17643e-11	0.000276535
1535	6.22056e-09	7.5158e-10	6.26317e-11	0.000414704
1536	4.19351e-09	5.06667e-10	4.22223e-11	0.000279567
1537	2.78257e-09	3.36195e-10	2.80162e-11	0.000185504
1538	3.97393e-09	4.80138e-10	4.00115e-11	0.000264929
1539	9.16073e-09	1.10682e-09	9.22347e-11	0.000610715
1540	5.97784e-09	7.22254e-10	6.01878e-11	0.000398522
1541	3.3926e-09	4.099e-10	3.41583e-11	0.000226173
1542	5.03678e-09	6.08554e-10	5.07128e-11	0.000335786
1543	3.42685e-09	4.14038e-10	3.45032e-11	0.000228456
1544	2.34647e-09	2.83505e-10	2.36255e-11	0.000156432
1545	7.5502e-09	9.1223e-10	7.60192e-11	0.000503347
1546	2.05327e-09	2.48079e-10	2.06733e-11	0.000136884
1547	3.62307e-09	4.37746e-10	3.64788e-11	0.000241538
1548	1.31009e-08	1.58288e-09	1.31906e-10	0.000873394
1549	3.28922e-09	3.97409e-10	3.31174e-11	0.000219281
1550	8.35757e-09	1.00978e-09	8.41481e-11	0.000557171
1551	6.408e-09	7.74226e-10	6.45189e-11	0.0004272
1552	6.5267e-09	7.88569e-10	6.57141e-11	0.000435113
1553	7.52964e-09	9.09746e-10	7.58121e-11	0.000501976
1554	1.34179e-08	1.62118e-09	1.35098e-10	0.000894527
1555	2.29465e-09	2.77244e-10	2.31037e-11	0.000152977
1556	4.38217e-09	5.29463e-10	4.41219e-11	0.000292145
1557	2.6784e-09	3.2361e-10	2.69675e-11	0.00017856
1558	5.0217e-09	6.06732e-10	5.0561e-11	0.00033478
1559	4.65911e-09	5.62922e-10	4.69102e-11	0.000310607
1560	7.17281e-09	8.66633e-10	7.22194e-11	0.000478187
1561	2.79107e-09	3.37222e-10	2.81019e-11	0.000186071
1562	5.75125e-09	6.94877e-10	5.79064e-11	0.000383417
1563	3.86023e-09	4.664e-10	3.88667e-11	0.000257349
1564	1.35691e-08	1.63945e-09	1.36621e-10	0.000904609
1565	4.89767e-09	5.91746e-10	4.93122e-11	0.000326511
1566	4.48846e-09	5.42304e-10	4.5192e-11	0.00029923
1567	3.23942e-09	3.91393e-10	3.26161e-11	0.000215962
1568	3.33967e-09	4.03505e-10	3.36254e-11	0.000222644
1569	4.70082e-09	5.67962e-10	4.73302e-11	0.000313388
1570	3.17692e-09	3.83842e-10	3.19868e-11	0.000211795
1571	1.0376e-08	1.25365e-09	1.0447e-10	0.000691732
1572	9.21623e-09	1.11352e-09	9.27935e-11	0.000614415
1573	5.95571e-09	7.1958e-10	5.9965e-11	0.000397047
1574	5.64967e-09	6.82604e-10	5.68837e-11	0.000376645
1575	4.25348e-09	5.13913e-10	4.28261e-11	0.000283565
1576	5.25392e-09	6.34789e-10	5.28991e-11	0.000350262
1577	4.18369e-09	5.05481e-10	4.21234e-11	0.000278913
1578	4.75946e-09	5.75047e-10	4.79206e-11	0.000317297
1579	4.22901e-09	5.10957e-10	4.25798e-11	0.000281934
1580	4.20085e-09	5.07555e-10	4.22963e-11	0.000280057
1581	2.31292e-09	2.79451e-10	2.32876e-11	0.000154195
1582	3.35278e-09	4.05089e-10	3.37574e-11	0.000223518
1583	2.34739e-09	2.83617e-10	2.36347e-11	0.000156493
1584	2.65191e-09	3.20409e-10	2.67008e-11	0.000176794
1585	4.13897e-09	5.00078e-10	4.16732e-11	0.000275931
1586	4.63154e-09	5.59591e-10	4.66326e-11	0.000308769
1587	3.30245e-09	3.99009e-10	3.32507e-11	0.000220164
1588	2.61497e-09	3.15946e-10	2.63288e-11	0.000174331
1589	8.23062e-09	9.94439e-10	8.28699e-11	0.000548708
1590	1.87314e-09	2.26316e-10	1.88597e-11	0.000124876
1591	5.31441e-09	6.42097e-10	5.35081e-11	0.000354294
1592	3.17027e-09	3.83038e-10	3.19198e-11	0.000211351
1593	7.91719e-09	9.5657e-10	7.97142e-11	0.000527813
1594	7.7136e-09	9.31972e-10	7.76644e-11	0.00051424
1595	3.67553e-09	4.44085e-10	3.70071e-11	0.000245036
1596	6.27382e-09	7.58014e-10	6.31679e-11	0.000418254
1597	1.25197e-09	1.51265e-10	1.26054e-11	8.34645e-05
1598	5.06894e-09	6.12439e-10	5.10366e-11	0.000337929
1599	6.1106e-09	7.38294e-10	6.15245e-11	0.000407373
1600	2.77155e-09	3.34864e-10	2.79053e-11	0.00018477
1601	6.48912e-09	7.84027e-10	6.53356e-11	0.000432608
1602	6.51514e-09	7.87171e-10	6.55976e-11	0.000434342
1603	5.00988e-09	6.05304e-10	5.0442e-11	0.000333992
1604	4.60858e-09	5.56817e-10	4.64014e-11	0.000307238
1605	6.79927e-09	8.215e-10	6.84584e-11	0.000453284
1606	4.86787e-09	5.88146e-10	4.90122e-11	0.000324525
1607	2.01461e-09	2.43409e-10	2.02841e-11	0.000134307
1608	7.88187e-09	9.52303e-10	7.93586e-11	0.000525458
1609	1.71466e-09	2.07168e-10	1.7264e-11	0.000114311
1610	3.0913e-09	3.73497e-10	3.11247e-11	0.000206087
1611	5.43416e-09	6.56566e-10	5.47138e-11	0.000362277
1612	2.96872e-09	3.58686e-10	2.98905e-11	0.000197915
1613	3.74096e-09	4.51989e-10	3.76658e-11	0.000249397
1614	2.31337e-09	2.79506e-10	2.32921e-11	0.000154225
1615	8.15345e-09	9.85116e-10	8.2093e-11	0.000543563
1616	9.03238e-09	1.09131e-09	9.09424e-11	0.000602158
1617	2.28135e-09	2.75637e-10	2.29697e-11	0.00015209
1618	2.84076e-09	3.43226e-10	2.86022e-11	0.000189384
1619	2.86571e-09	3.46241e-10	2.88534e-11	0.000191048
1620	2.55404e-09	3.08584e-10	2.57153e-11	0.000170269
1621	4.01887e-09	4.85568e-10	4.0464e-11	0.000267925
1622	5.87511e-09	7.09842e-10	5.91535e-11	0.000391674
1623	7.11261e-09	8.59359e-10	7.16132e-11	0.000474174
1624	2.19718e-09	2.65467e-10	2.21223e-11	0.000146479
1625	4.03425e-09	4.87426e-10	4.06188e-11	0.00026895
1626	3.85518e-09	4.6579e-10	3.88158e-11	0.000257012
1627	2.41908e-09	2.92277e-10	2.43565e-11	0.000161272
1628	4.34678e-09	5.25187e-10	4.37656e-11	0.000289786
1629	4.22078e-09	5.09963e-10	4.24969e-11	0.000281386
1630	4.08716e-09	4.93818e-10	4.11515e-11	0.000272477
1631	3.97316e-09	4.80045e-10	4.00037e-11	0.000264877
1632	4.20456e-09	5.08003e-10	4.23336e-11	0.000280304
1633	2.31105e-09	2.79225e-10	2.32688e-11	0.00015407
1634	9.60377e-09	1.16035e-09	9.66955e-11	0.000640251
1635	3.37605e-09	4.07901e-10	3.39917e-11	0.00022507
1636	1.75119e-09	2.11582e-10	1.76319e-11	0.000116746
1637	4.73124e-09	5.71637e-10	4.76365e-11	0.000315416
1638	4.53617e-09	5.48068e-10	4.56724e-11	0.000302411
1639	7.93483e-09	9.58702e-10	7.98918e-11	0.000528989
1640	1.94213e-08	2.34652e-09	1.95543e-10	0.00129475
1641	2.3758e-09	2.87048e-10	2.39207e-11	0.000158386
1642	3.13516e-09	3.78796e-10	3.15663e-11	0.000209011
1643	3.71258e-09	4.48561e-10	3.73801e-11	0.000247505
1644	4.52382e-09	5.46576e-10	4.5548e-11	0.000301588
1645	2.10766e-09	2.54652e-10	2.1221e-11	0.000140511
1646	5.05256e-09	6.10459e-10	5.08716e-11	0.000336837
1647	2.71393e-09	3.27902e-10	2.73252e-11	0.000180928
1648	2.53706e-09	3.06532e-10	2.55444e-11	0.000169137
1649	2.96316e-09	3.58015e-10	2.98346e-11	0.000197544
1650	4.25527e-09	5.1413e-10	4.28442e-11	0.000283685
1651	3.17387e-09	3.83473e-10	3.19561e-11	0.000211591
1652	4.41426e-09	5.3334e-10	4.4445e-11	0.000294284
1653	7.2063e-09	8.7068e-10	7.25566e-11	0.00048042
1654	3.00305e-09	3.62834e-10	3.02362e-11	0.000200203
1655	5.24217e-09	6.33369e-10	5.27808e-11	0.000349478
1656	5.33979e-09	6.45163e-10	5.37636e-11	0.000355986
1657	3.6321e-09	4.38837e-10	3.65698e-11	0.00024214
1658	5.05642e-09	6.10927e-10	5.09106e-11	0.000337095
1659	3.60346e-09	4.35377e-10	3.62815e-11	0.000240231
1660	2.21394e-09	2.67493e-10	2.22911e-11	0.000147596
1661	6.20858e-09	7.50133e-10	6.25111e-11	0.000413905
1662	5.59481e-09	6.75976e-10	5.63313e-11	0.000372987
1663	3.99096e-09	4.82196e-10	4.0183e-11	0.000266064
1664	3.05891e-09	3.69583e-10	3.07986e-11	0.000203927
1665	3.24088e-09	3.9157e-10	3.26308e-11	0.000216059
1666	4.66514e-09	5.63651e-10	4.69709e-11	0.000311009
1667	5.78924e-09	6.99467e-10	5.82889e-11	0.000385949
1668	4.66036e-09	5.63074e-10	4.69228e-11	0.000310691
1669	8.24803e-09	9.96543e-10	8.30453e-11	0.000549869
1670	4.42812e-09	5.35014e-10	4.45845e-11	0.000295208
1671	2.26611e-09	2.73796e-10	2.28163e-11	0.000151074
1672	4.49253e-09	5.42796e-10	4.5233e-11	0.000299502
1673	1.42308e-09	1.7194e-10	1.43283e-11	9.48722e-05
1674	7.25767e-09	8.76885e-10	7.30738e-11	0.000483844
1675	2.93976e-09	3.55188e-10	2.9599e-11	0.000195984
1676	4.36648e-09	5.27566e-10	4.39638e-11	0.000291098
1677	4.30686e-09	5.20364e-10	4.33636e-11	0.000287124
1678	4.98804e-09	6.02664e-10	5.0222e-11	0.000332536
1679	3.26805e-09	3.94853e-10	3.29044e-11	0.00021787
1680	8.9062e-09	1.07606e-09	8.9672e-11	0.000593747
1681	2.63425e-09	3.18275e-10	2.65229e-11	0.000175617
1682	2.79222e-09	3.37361e-10	2.81135e-11	0.000186148
1683	5.09352e-09	6.15409e-10	5.12841e-11	0.000339568
1684	3.40699e-09	4.11639e-10	3.43033e-11	0.000227133
1685	1.98413e-09	2.39727e-10	1.99772e-11	0.000132275
1686	3.9591e-09	4.78346e-10	3.98622e-11	0.00026394
1687	2.17819e-09	2.63173e-10	2.19311e-11	0.000145213
1688	2.942e-09	3.55458e-10	2.96215e-11	0.000196133
1689	4.07454e-09	4.92294e-10	4.10245e-11	0.000271636
1690	5.77213e-09	6.974e-10	5.81167e-11	0.000384809
1691	2.22441e-09	2.68758e-10	2.23965e-11	0.000148294
1692	4.72945e-09	5.71422e-10	4.76185e-11	0.000315297
1693	1.36639e-09	1.6509e-10	1.37575e-11	9.10929e-05
1694	8.76828e-09	1.0594e-09	8.82834e-11	0.000584552
1695	8.06107e-09	9.73953e-10	8.11628e-11	0.000537404
1696	9.8366e-09	1.18848e-09	9.90398e-11	0.000655774
1697	5.27073e-09	6.3682e-10	5.30683e-11	0.000351382
1698	4.0826e-09	4.93267e-10	4.11056e-11	0.000272173
1699	2.44519e-09	2.95433e-10	2.46194e-11	0.000163013
1700	3.2456e-09	3.9214e-10	3.26783e-11	0.000216373
1701	4.25934e-09	5.14621e-10	4.28851e-11	0.000283956
1702	4.37386e-09	5.28459e-10	4.40382e-11	0.000291591
1703	4.13149e-09	4.99175e-10	4.15979e-11	0.000275433
1704	2.8085e-09	3.39328e-10	2.82773e-11	0.000187233
1705	6.92108e-09	8.36219e-10	6.96849e-11	0.000461406
1706	2.06596e-09	2.49614e-10	2.08011e-11	0.000137731
1707	5.08606e-09	6.14507e-10	5.1209e-11	0.000339071
1708	3.7587e-09	4.54134e-10	3.78445e-11	0.00025058
1709	2.80214e-09	3.3856e-10	2.82133e-11	0.000186809
1710	6.54792e-09	7.91133e-10	6.59277e-11	0.000436528
1711	3.58712e-09	4.33402e-10	3.61169e-11	0.000239141
1712	2.74947e-09	3.32196e-10	2.7683e-11	0.000183298
1713	4.63554e-09	5.60075e-10	4.66729e-11	0.000309036
1714	3.27938e-09	3.96221e-10	3.30184e-11	0.000218625
1715	2.1414e-09	2.58729e-10	2.15607e-11	0.00014276
1716	4.9896e-09	6.02853e-10	5.02378e-11	0.00033264
1717	3.91633e-09	4.73178e-10	3.94315e-11	0.000261089
1718	1.71387e-09	2.07074e-10	1.72561e-11	0.000114258
1719	7.23658e-09	8.74338e-10	7.28615e-11	0.000482439
1720	2.64001e-09	3.18971e-10	2.65809e-11	0.000176001
1721	9.98215e-09	1.20606e-09	1.00505e-10	0.000665477
1722	3.31372e-09	4.0037e-10	3.33642e-11	0.000220915
1723	2.03729e-09	2.4615e-10	2.05125e-11	0.00013582
1724	7.55838e-09	9.13218e-10	7.61015e-11	0.000503892
1725	4.52661e-09	5.46914e-10	4.55762e-11	0.000301774
1726	2.76885e-09	3.34538e-10	2.78782e-11	0.00018459
1727	4.20732e-09	5.08336e-10	4.23614e-11	0.000280488
1728	5.79238e-09	6.99846e-10	5.83205e-11	0.000386159
1729	3.25141e-09	3.92841e-10	3.27368e-11	0.00021676
1730	3.63902e-09	4.39674e-10	3.66395e-11	0.000242602
1731	4.73546e-09	5.72147e-10	4.76789e-11	0.000315697
1732	3.58948e-09	4.33688e-10	3.61406e-11	0.000239299
1733	5.02734e-09	6.07412e-10	5.06177e-11	0.000335156
1734	3.78352e-09	4.57132e-10	3.80943e-11	0.000252234
1735	4.89e-09	5.9082e-10	4.9235e-11	0.000326
1736	7.2979e-09	8.81746e-10	7.34789e-11	0.000486527
1737	6.3485e-09	7.67038e-10	6.39198e-11	0.000423233
1738	4.91219e-09	5.935e-10	4.94583e-11	0.000327479
1739	5.57522e-09	6.73609e-10	5.61341e-11	0.000371682
1740	5.86436e-09	7.08543e-10	5.90452e-11	0.000390957
1741	3.284e-09	3.96779e-10	3.30649e-11	0.000218933
1742	2.87451e-09	3.47304e-10	2.8942e-11	0.000191634
1743	3.75253e-09	4.53388e-10	3.77823e-11	0.000250169
1744	3.99566e-09	4.82763e-10	4.02303e-11	0.000266377
1745	3.60327e-09	4.35354e-10	3.62795e-11	0.000240218
1746	1.28324e-09	1.55043e-10	1.29203e-11	8.55492e-05
1747	4.00564e-09	4.83969e-10	4.03308e-11	0.000267043
1748	1.7663e-09	2.13407e-10	1.7784e-11	0.000117753
1749	3.70778e-09	4.47981e-10	3.73318e-11	0.000247186
1750	2.5476e-09	3.07806e-10	2.56505e-11	0.00016984
1751	9.38498e-09	1.13391e-09	9.44926e-11	0.000625665
1752	4.13722e-09	4.99867e-10	4.16556e-11	0.000275815
1753	4.10286e-09	4.95715e-10	4.13096e-11	0.000273524
1754	4.52319e-09	5.465e-10	4.55417e-11	0.000301546
1755	2.07524e-09	2.50734e-10	2.08945e-11	0.000138349
1756	6.08899e-09	7.35683e-10	6.13069e-11	0.000405933
1757	3.74066e-09	4.51954e-10	3.76628e-11	0.000249377
1758	5.29522e-09	6.39779e-10	5.33149e-11	0.000353015
1759	4.56237e-09	5.51235e-10	4.59362e-11	0.000304158
1760	1.8794e-09	2.27073e-10	1.89227e-11	0.000125293
1761	7.35694e-09	8.88879e-10	7.40733e-11	0.000490462
1762	4.58977e-09	5.54545e-10	4.62121e-11	0.000305985
1763	5.42996e-09	6.56058e-10	5.46715e-11	0.000361997
1764	4.01748e-09	4.85399e-10	4.04499e-11	0.000267832
1765	1.7898e-08	2.16247e-09	1.80206e-10	0.0011932
1766	4.59755e-09	5.55485e-10	4.62904e-11	0.000306503
1767	3.72131e-09	4.49616e-10	3.7468e-11	0.000248087
1768	4.82466e-09	5.82925e-10	4.85771e-11	0.000321644
1769	3.22226e-09	3.89319e-10	3.24433e-11	0.000214817
1770	4.9236e-09	5.94879e-10	4.95732e-11	0.00032824
1771	3.22105e-09	3.89174e-10	3.24311e-11	0.000214737
1772	4.99392e-09	6.03375e-10	5.02812e-11	0.000332928
1773	9.56291e-09	1.15541e-09	9.62841e-11	0.000637528
1774	9.48621e-09	1.14614e-09	9.55118e-11	0.000632414
1775	2.39873e-09	2.89819e-10	2.41516e-11	0.000159915
1776	3.40354e-09	4.11223e-10	3.42686e-11	0.000226903
1777	3.53205e-09	4.26749e-10	3.55624e-11	0.00023547
1778	4.47721e-09	5.40945e-10	4.50787e-11	0.000298481
1779	6.2982e-09	7.6096e-10	6.34133e-11	0.00041988
1780	3.98932e-09	4.81997e-10	4.01664e-11	0.000265955
1781	4.38679e-09	5.3002e-10	4.41684e-11	0.000292453
1782	1.88326e-09	2.27539e-10	1.89616e-11	0.000125551
1783	5.9161e-09	7.14794e-10	5.95662e-11	0.000394406
1784	4.86018e-09	5.87217e-10	4.89347e-11	0.000324012
1785	4.85726e-09	5.86863e-10	4.89052e-11	0.000323817
1786	4.01589e-09	4.85208e-10	4.0434e-11	0.000267726
1787	3.5277e-09	4.26224e-10	3.55187e-11	0.00023518
1788	2.61235e-09	3.15629e-10	2.63024e-11	0.000174157
1789	3.34717e-09	4.04411e-10	3.3701e-11	0.000223145
1790	4.42227e-09	5.34307e-10	4.45256e-11	0.000294818
1791	3.87588e-09	4.68292e-10	3.90243e-11	0.000258392
1792	5.68763e-09	6.87191e-10	5.72659e-11	0.000379176
1793	5.01308e-09	6.05691e-10	5.04742e-11	0.000334206
1794	8.00057e-09	9.66644e-10	8.05537e-11	0.000533371
1795	7.54648e-09	9.1178e-10	7.59816e-11	0.000503098
1796	3.37896e-09	4.08253e-10	3.40211e-11	0.000225264
1797	4.58688e-09	5.54195e-10	4.61829e-11	0.000305792
1798	2.49465e-09	3.01408e-10	2.51174e-11	0.00016631
1799	4.76207e-09	5.75363e-10	4.79469e-11	0.000317472
1800	1.31675e-09	1.59093e-10	1.32577e-11	8.77835e-05
1801	6.41702e-09	7.75317e-10	6.46097e-11	0.000427801
1802	3.01539e-09	3.64325e-10	3.03604e-11	0.000201026
1803	3.67885e-09	4.44485e-10	3.70405e-11	0.000245257
1804	3.89152e-09	4.70181e-10	3.91817e-11	0.000259435
1805	4.65902e-09	5.62912e-10	4.69093e-11	0.000310602
1806	1.38557e-09	1.67407e-10	1.39506e-11	9.23711e-05
1807	8.78144e-09	1.06099e-09	8.84159e-11	0.000585429
1808	2.91087e-09	3.51697e-10	2.93081e-11	0.000194058
1809	3.36297e-09	4.0632e-10	3.386e-11	0.000224198
1810	3.34384e-09	4.04009e-10	3.36674e-11	0.000222922
1811	7.81101e-09	9.43741e-10	7.86451e-11	0.000520734
1812	5.32479e-09	6.43351e-10	5.36126e-11	0.000354986
1813	2.43396e-09	2.94075e-10	2.45063e-11	0.000162264
1814	3.55158e-09	4.29109e-10	3.57591e-11	0.000236772
1815	4.1634e-09	5.0303e-10	4.19192e-11	0.00027756
1816	2.63707e-09	3.18616e-10	2.65514e-11	0.000175805
1817	7.43785e-09	8.98655e-10	7.48879e-11	0.000495857
1818	4.88587e-09	5.9032e-10	4.91934e-11	0.000325725
1819	7.37078e-09	8.90552e-10	7.42126e-11	0.000491385
1820	9.58439e-09	1.158e-09	9.65004e-11	0.000638959
1821	2.69737e-09	3.25901e-10	2.71585e-11	0.000179825
1822	8.05313e-09	9.72994e-10	8.10829e-11	0.000536875
1823	3.12469e-09	3.7753e-10	3.14609e-11	0.000208312
1824	4.42912e-09	5.35135e-10	4.45946e-11	0.000295275
1825	3.68003e-09	4.44628e-10	3.70523e-11	0.000245335
1826	2.6556e-09	3.20855e-10	2.67379e-11	0.00017704
1827	7.25006e-09	8.75966e-10	7.29972e-11	0.000483337
1828	8.99573e-09	1.08688e-09	9.05734e-11	0.000599715
1829	3.42282e-09	4.13552e-10	3.44627e-11	0.000228188
1830	4.73094e-09	5.71601e-10	4.76334e-11	0.000315396
1831	4.48606e-09	5.42015e-10	4.51679e-11	0.000299071
1832	3.91271e-09	4.72741e-10	3.93951e-11	0.000260847
1833	5.77317e-09	6.97526e-10	5.81272e-11	0.000384878
1834	4.87837e-09	5.89414e-10	4.91178e-11	0.000325225
1835	3.95556e-09	4.77918e-10	3.98265e-11	0.000263704
1836	2.50533e-09	3.02699e-10	2.52249e-11	0.000167022
1837	4.16747e-09	5.03522e-10	4.19601e-11	0.000277831
1838	4.14571e-09	5.00893e-10	4.17411e-11	0.000276381
1839	5.31903e-09	6.42655e-10	5.35546e-11	0.000354602
1840	3.38521e-09	4.09008e-10	3.4084e-11	0.000225681
1841	4.35878e-09	5.26636e-10	4.38863e-11	0.000290585
1842	5.73017e-09	6.9233e-10	5.76942e-11	0.000382011
1843	5.11036e-09	6.17444e-10	5.14537e-11	0.000340691
1844	6.73616e-09	8.13876e-10	6.7823e-11	0.000449078
1845	3.87977e-09	4.68761e-10	3.90634e-11	0.000258651
1846	5.93236e-09	7.16759e-10	5.97299e-11	0.000395491
1847	5.1884e-09	6.26872e-10	5.22393e-11	0.000345893
1848	3.76788e-09	4.55243e-10	3.79369e-11	0.000251192
1849	6.79993e-09	8.21581e-10	6.84651e-11	0.000453329
1850	3.35559e-09	4.05429e-10	3.37857e-11	0.000223706
1851	1.03947e-08	1.25591e-09	1.04659e-10	0.00069298
1852	5.7492e-09	6.94629e-10	5.78857e-11	0.00038328
1853	4.99262e-09	6.03218e-10	5.02681e-11	0.000332841
1854	4.02887e-09	4.86776e-10	4.05647e-11	0.000268591
1855	2.65009e-09	3.20189e-10	2.66824e-11	0.000176673
1856	3.54477e-09	4.28286e-10	3.56905e-11	0.000236318
1857	3.61969e-09	4.37337e-10	3.64448e-11	0.000241312
1858	3.69967e-09	4.47002e-10	3.72501e-11	0.000246645
1859	3.33439e-09	4.02868e-10	3.35723e-11	0.000222293
1860	7.25972e-09	8.77133e-10	7.30944e-11	0.000483981
1861	4.64394e-09	5.6109e-10	4.67575e-11	0.000309596
1862	4.24358e-09	5.12717e-10	4.27264e-11	0.000282905
1863	3.7134e-09	4.4866e-10	3.73884e-11	0.00024756
1864	2.81136e-09	3.39674e-10	2.83062e-11	0.000187424
1865	9.08768e-09	1.09799e-09	9.14992e-11	0.000605845
1866	2.18986e-09	2.64584e-10	2.20486e-11	0.000145991
1867	5.3592e-09	6.47508e-10	5.3959e-11	0.00035728
1868	3.39625e-09	4.10341e-10	3.41951e-11	0.000226417
1869	3.44276e-09	4.15961e-10	3.46634e-11	0.000229518
1870	7.4434e-09	8.99326e-10	7.49439e-11	0.000496227
1871	2.56325e-09	3.09697e-10	2.58081e-11	0.000170883
1872	4.81354e-09	5.81581e-10	4.84651e-11	0.000320903
1873	4.08269e-09	4.93278e-10	4.11065e-11	0.000272179
1874	2.95408e-09	3.56917e-10	2.97431e-11	0.000196938
1875	2.2637e-09	2.73505e-10	2.27921e-11	0.000150914
1876	3.39794e-09	4.10545e-10	3.42121e-11	0.000226529
1877	3.66475e-09	4.42782e-10	3.68985e-11	0.000244317
1878	4.32188e-09	5.22178e-10	4.35148e-11	0.000288125
1879	3.66396e-09	4.42687e-10	3.68906e-11	0.000244264
1880	6.75441e-09	8.16081e-10	6.80067e-11	0.000450294
1881	3.93079e-09	4.74926e-10	3.95771e-11	0.000262053
1882	4.17007e-09	5.03835e-10	4.19863e-11	0.000278004
1883	1.04437e-08	1.26182e-09	1.05152e-10	0.000696245
1884	5.10201e-09	6.16434e-10	5.13695e-11	0.000340134
1885	8.53549e-09	1.03127e-09	8.59395e-11	0.000569033
1886	4.04375e-09	4.88573e-10	4.07144e-11	0.000269583
1887	6.89268e-09	8.32787e-10	6.93989e-11	0.000459512
1888	9.65542e-09	1.16659e-09	9.72156e-11	0.000643695
1889	3.95511e-09	4.77864e-10	3.9822e-11	0.000263674
1890	7.72692e-09	9.33582e-10	7.77985e-11	0.000515128
1891	5.11521e-09	6.18029e-10	5.15024e-11	0.000341014
1892	9.59148e-09	1.15886e-09	9.65718e-11	0.000639432
1893	3.75219e-09	4.53347e-10	3.77789e-11	0.000250146
1894	4.80963e-09	5.81108e-10	4.84257e-11	0.000320642
1895	6.74138e-09	8.14506e-10	6.78755e-11	0.000449425
1896	4.68906e-09	5.66542e-10	4.72118e-11	0.000312604
1897	2.94324e-09	3.55608e-10	2.9634e-11	0.000196216
1898	3.7445e-09	4.52418e-10	3.77015e-11	0.000249633
1899	1.5013e-08	1.8139e-09	1.51158e-10	0.00100087
1900	4.34125e-09	5.24518e-10	4.37098e-11	0.000289416
1901	1.37329e-09	1.65923e-10	1.3827e-11	9.15526e-05
1902	1.44721e-09	1.74855e-10	1.45712e-11	9.64806e-05
1903	1.92593e-09	2.32695e-10	1.93912e-11	0.000128395
1904	2.98731e-09	3.60932e-10	3.00777e-11	0.000199154
1905	3.76015e-09	4.54308e-10	3.7859e-11	0.000250676
1906	8.53949e-09	1.03176e-09	8.59798e-11	0.000569299
1907	1.27289e-08	1.53793e-09	1.28161e-10	0.000848594
1908	3.46552e-09	4.1871e-10	3.48925e-11	0.000231035
1909	2.5744e-09	3.11044e-10	2.59203e-11	0.000171626
1910	2.68386e-09	3.24269e-10	2.70224e-11	0.000178924
1911	3.71619e-09	4.48998e-10	3.74165e-11	0.000247746
1912	2.40749e-09	2.90877e-10	2.42398e-11	0.000160499
1913	5.62524e-09	6.79652e-10	5.66376e-11	0.000375016
1914	3.64775e-09	4.40728e-10	3.67273e-11	0.000243183
1915	2.74555e-09	3.31722e-10	2.76435e-11	0.000183036
1916	3.74007e-09	4.51882e-10	3.76569e-11	0.000249338
1917	4.47575e-09	5.40769e-10	4.50641e-11	0.000298383
1918	1.39479e-08	1.68521e-09	1.40434e-10	0.000929859
1919	5.28763e-09	6.38862e-10	5.32385e-11	0.000352509
1920	3.29929e-09	3.98627e-10	3.32189e-11	0.000219953
1921	5.1477e-09	6.21955e-10	5.18296e-11	0.00034318
1922	3.00328e-09	3.62862e-10	3.02385e-11	0.000200219
1923	4.20798e-09	5.08416e-10	4.2368e-11	0.000280532
1924	5.3701e-09	6.48826e-10	5.40688e-11	0.000358007
1925	2.9383e-09	3.55011e-10	2.95842e-11	0.000195886
1926	2.62438e-09	3.17083e-10	2.64236e-11	0.000174959
1927	3.89988e-09	4.71191e-10	3.92659e-11	0.000259992
1928	2.77104e-09	3.34802e-10	2.79002e-11	0.000184736
1929	1.55361e-08	1.8771e-09	1.56425e-10	0.00103574
1930	3.43441e-09	4.14952e-10	3.45793e-11	0.000228961
1931	3.60292e-09	4.35311e-10	3.62759e-11	0.000240194
1932	5.18971e-09	6.2703e-10	5.22525e-11	0.00034598
1933	4.99593e-09	6.03618e-10	5.03015e-11	0.000333062
1934	3.06106e-09	3.69843e-10	3.08202e-11	0.000204071
1935	4.10661e-09	4.96169e-10	4.13474e-11	0.000273774
1936	5.91136e-09	7.14221e-10	5.95185e-11	0.00039409
1937	2.73918e-09	3.30952e-10	2.75794e-11	0.000182612
1938	2.69895e-09	3.26092e-10	2.71743e-11	0.00017993
1939	7.17185e-09	8.66517e-10	7.22098e-11	0.000478124
1940	2.61024e-09	3.15375e-10	2.62812e-11	0.000174016
1941	8.37277e-09	1.01161e-09	8.43011e-11	0.000558184
1942	4.22934e-09	5.10997e-10	4.25831e-11	0.000281956
1943	2.07553e-09	2.50769e-10	2.08974e-11	0.000138369
1944	4.97377e-09	6.00941e-10	5.00784e-11	0.000331585
1945	3.34318e-09	4.03929e-10	3.36608e-11	0.000222879
1946	2.91312e-09	3.51969e-10	2.93308e-11	0.000194208
1947	4.44261e-09	5.36765e-10	4.47304e-11	0.000296174
1948	4.4327e-09	5.35568e-10	4.46307e-11	0.000295514
1949	6.11803e-09	7.39192e-10	6.15993e-11	0.000407869
1950	6.22659e-09	7.52309e-10	6.26924e-11	0.000415106
1951	4.44245e-09	5.36745e-10	4.47287e-11	0.000296163
1952	4.98047e-09	6.0175e-10	5.01458e-11	0.000332031
1953	2.59957e-09	3.14085e-10	2.61737e-11	0.000173305
1954	3.30528e-09	3.9935e-10	3.32792e-11	0.000220352
1955	2.14283e-09	2.58901e-10	2.15751e-11	0.000142856
1956	3.09803e-09	3.7431e-10	3.11925e-11	0.000206535
1957	3.12285e-09	3.77309e-10	3.14424e-11	0.00020819
1958	5.65272e-09	6.82972e-10	5.69144e-11	0.000376848
1959	3.88255e-09	4.69097e-10	3.90914e-11	0.000258837
1960	5.32689e-09	6.43605e-10	5.36337e-11	0.000355126
1961	2.96234e-09	3.57916e-10	2.98263e-11	0.000197489
1962	1.03521e-08	1.25077e-09	1.04231e-10	0.000690143
1963	3.79674e-09	4.5873e-10	3.82275e-11	0.000253116
1964	6.33218e-09	7.65066e-10	6.37555e-11	0.000422145
1965	4.79424e-09	5.79249e-10	4.82707e-11	0.000319616
1966	5.78818e-09	6.99339e-10	5.82782e-11	0.000385879
1967	5.25431e-09	6.34836e-10	5.2903e-11	0.000350287
1968	2.24824e-09	2.71636e-10	2.26364e-11	0.000149883
1969	5.43244e-09	6.56358e-10	5.46965e-11	0.000362163
1970	2.54872e-09	3.07941e-10	2.56617e-11	0.000169914
1971	4.38678e-09	5.30019e-10	4.41683e-11	0.000292452
1972	3.8923e-09	4.70275e-10	3.91896e-11	0.000259487
1973	3.21131e-09	3.87996e-10	3.2333e-11	0.000214087
1974	3.87465e-09	4.68143e-10	3.90119e-11	0.00025831
1975	3.68978e-09	4.45806e-10	3.71505e-11	0.000245985
1976	3.14548e-09	3.80043e-10	3.16702e-11	0.000209698
1977	1.25538e-08	1.51677e-09	1.26397e-10	0.000836917
1978	5.41546e-09	6.54306e-10	5.45255e-11	0.00036103
1979	2.9159e-09	3.52305e-10	2.93587e-11	0.000194393
1980	2.96907e-09	3.58729e-10	2.98941e-11	0.000197938
1981	7.07059e-09	8.54283e-10	7.11902e-11	0.000471373
1982	5.17428e-09	6.25166e-10	5.20972e-11	0.000344952
1983	3.33954e-09	4.03489e-10	3.36241e-11	0.000222636
1984	3.61947e-09	4.37311e-10	3.64426e-11	0.000241298
1985	3.38503e-09	4.08986e-10	3.40821e-11	0.000225669
1986	7.076e-09	8.54936e-10	7.12447e-11	0.000471734
1987	1.37311e-08	1.65902e-09	1.38251e-10	0.000915405
1988	5.40281e-09	6.52778e-10	5.43982e-11	0.000360187
1989	5.37067e-09	6.48894e-10	5.40745e-11	0.000358044
1990	2.68864e-09	3.24847e-10	2.70706e-11	0.000179243
1991	6.6467e-09	8.03067e-10	6.69222e-11	0.000443113
1992	2.94273e-09	3.55546e-10	2.96288e-11	0.000196182
1993	1.54186e-08	1.86291e-09	1.55242e-10	0.00102791
1994	4.69397e-09	5.67135e-10	4.72612e-11	0.000312932
1995	8.1921e-09	9.89786e-10	8.24821e-11	0.00054614
1996	3.78773e-09	4.57641e-10	3.81368e-11	0.000252515
1997	4.9829e-09	6.02043e-10	5.01703e-11	0.000332193
1998	4.89933e-09	5.91947e-10	4.93289e-11	0.000326622
1999	3.9969e-09	4.82913e-10	4.02427e-11	0.00026646
[truncated: 8,001 more rows]
