# Supplementary material for: Health risk assessment from habitants of Araró, Michoacán, México, exposed to arsenic by dust, using Monte Carlo probabilistic method
Source: PeerJ. 2025 Jun 10;13:e18805. doi: 10.7717/peerj.18805 (PMC12164815; doi:10.7717/peerj.18805)
Supplement: Supplemental Information 3 [file peerj-13-18805-s003.xlsx]

## Sheet: Risk Premises
Study Title:	Inhalación premisas simulación.					Last simulation run:
Study File:	Inhalación premisas simulación.xlsx					2022-11-07 12:16:15
	Output Cells	Histogram settings				Multi-cell output range names
Description for Reports	Range Names	Min value	Max value	Step size		title row or column (optional)
	ADD	Auto	Auto	Auto
	ADD_carc	Auto	Auto	Auto
	CR	Auto	Auto	Auto
	HQ	Auto	Auto	Auto
		Study	Min				Max
	Input Cells	File	Allowed		Expected		Allowed
Description for Reports	Range Names	Values	Values	10/90	Values	90/10	Values	Distributions	Parameters and chart settings
	BW	72.67	18.5	45.1879	73.0913	100.903	194.2	Normal	Mean	72.67	std dev	21.9625	X Axis Min	auto	X Axis Max	auto
	Conc	15.6	5.94	10.1171	15.7996	21.5085	42.53	Normal	Mean	15.6	std dev	4.57375	X Axis Min	auto	X Axis Max	auto
	ED	45.94	20	31.9828	46.2808	60.5952	111	Normal	Mean	45.94	std dev	11.375	X Axis Min	auto	X Axis Max	auto

## Sheet: Simulation Summary
	10000	Simulations run
					Change in expected values as simulations increase									Change in standard deviation as simulations increase
	Minimum result	Maximum result	Expected value	Std deviation	125	250	500	1000	2000	4000	8000	10000		125	250	500	1000	2000	4000	8000	10000
ADD	3.93696e-10	1.93903e-08	2.83464e-09	1.56239e-09	-	-0.000505638	-0.00807468	-0.0172272	-0.00801001	0.00282223	-0.00205458	0.00772949		-	0.0545612	-0.0606112	-0.00457562	0.00353	0.0506263	-0.017627	0.0207709
ADD_carc	2.47759e-10	1.22026e-08	1.78388e-09	9.83237e-10	-	-0.000505638	-0.00807468	-0.0172272	-0.00801001	0.00282223	-0.00205458	0.00772949		-	0.0545612	-0.0606112	-0.00457562	0.00353	0.0506263	-0.017627	0.0207709
CR	2.06466e-11	1.01688e-09	1.48657e-10	8.19364e-11	-	-0.000505638	-0.00807468	-0.0172272	-0.00801001	0.00282223	-0.00205458	0.00772949		-	0.0545612	-0.0606112	-0.00457562	0.00353	0.0506263	-0.017627	0.0207709
HQ	2.62464e-05	0.00129269	0.000188976	0.000104159	-	-0.000505638	-0.00807468	-0.0172272	-0.00801001	0.00282223	-0.00205458	0.00772949		-	0.0545612	-0.0606112	-0.00457562	0.00353	0.0506263	-0.017627	0.0207709

## Sheet: Simulation variance
This worksheet shows the convergence of the output variables as a function of the number of simulations
You should run enough simulations until the % change is very small, typically < 1.0%
ADD
	# of Sims	125	250	500	1000	2000	4000	8000	10000
	Avg Value	2.90806e-09	2.90659e-09	2.88312e-09	2.83345e-09	2.81076e-09	2.81869e-09	2.8129e-09	2.83464e-09
	% Chg		-0.000505638	-0.00807468	-0.0172272	-0.00801001	0.00282223	-0.00205458	0.00772949
	Std Dev.	1.49858e-09	1.58035e-09	1.48456e-09	1.47777e-09	1.48299e-09	1.55806e-09	1.5306e-09	1.56239e-09
	% Chg		0.0545612	-0.0606112	-0.00457562	0.00353	0.0506263	-0.017627	0.0207709
ADD_carc
	# of Sims	125	250	500	1000	2000	4000	8000	10000
	Avg Value	1.83009e-09	1.82916e-09	1.81439e-09	1.78313e-09	1.76885e-09	1.77384e-09	1.7702e-09	1.78388e-09
	% Chg		-0.000505638	-0.00807468	-0.0172272	-0.00801001	0.00282223	-0.00205458	0.00772949
	Std Dev.	9.43082e-10	9.94537e-10	9.34257e-10	9.29983e-10	9.33265e-10	9.80513e-10	9.6323e-10	9.83237e-10
	% Chg		0.0545612	-0.0606112	-0.00457562	0.00353	0.0506263	-0.017627	0.0207709
CR
	# of Sims	125	250	500	1000	2000	4000	8000	10000
	Avg Value	1.52507e-10	1.5243e-10	1.51199e-10	1.48594e-10	1.47404e-10	1.4782e-10	1.47517e-10	1.48657e-10
	% Chg		-0.000505638	-0.00807468	-0.0172272	-0.00801001	0.00282223	-0.00205458	0.00772949
	Std Dev.	7.85901e-11	8.28781e-11	7.78548e-11	7.74985e-11	7.77721e-11	8.17094e-11	8.02691e-11	8.19364e-11
	% Chg		0.0545612	-0.0606112	-0.00457562	0.00353	0.0506263	-0.017627	0.0207709
HQ
	# of Sims	125	250	500	1000	2000	4000	8000	10000
	Avg Value	0.000193871	0.000193773	0.000192208	0.000188897	0.000187384	0.000187913	0.000187526	0.000188976
	% Chg		-0.000505638	-0.00807468	-0.0172272	-0.00801001	0.00282223	-0.00205458	0.00772949
	Std Dev.	9.99056e-05	0.000105357	9.89708e-05	9.8518e-05	9.88657e-05	0.000103871	0.00010204	0.000104159
	% Chg		0.0545612	-0.0606112	-0.00457562	0.00353	0.0506263	-0.017627	0.0207709

## Sheet: ADD Results
ADD Results
Minimum result	3.93696e-10				2.52552e-09	Study value
Maximum result	1.93903e-08				0.5096	of results are equal or lower
Expected value	2.83464e-09				0.4904	of results are equal or greater
Std Deviation	1.56239e-09
Out of 10000 simulations		Of those with numeric values:
10000 had numeric values.			5% <=	1.1151e-09
0 had error values.			10% <=	1.33443e-09
			15% <=	1.50418e-09
			20% <=	1.65927e-09
			25% <=	1.79616e-09
			30% <=	1.93302e-09
			35% <=	2.07701e-09
			40% <=	2.21775e-09
			45% <=	2.35053e-09
			50% <=	2.4916e-09
			55% <=	2.65099e-09
			60% <=	2.81286e-09
			65% <=	2.99654e-09
			70% <=	3.19993e-09
			75% <=	3.4328e-09
			80% <=	3.73804e-09
			85% <=	4.13092e-09
			90% <=	4.67389e-09
			95% <=	5.69768e-09
			100% <=	1.93903e-08
If ADD is:				2.52552e-09	0.5096	of results are equal or lower
(Chg to do what ifs)					0.4904	of results are greater
					Cumulative				Cumulative
ADD	frequency:				frequency:				frequency:
<=3.93696E-10	1	0.0001		<=3.93696E-10	1	0.0001		=>3.93696E-10	10000	1
3.93696E-10 to 1.39352E-09	1155	0.1155		<=1.39352E-09	1156	0.1156		=>1.39352E-09	8844	0.8844
1.39352E-09 to 2.39334E-09	3485	0.3485		<=2.39334E-09	4641	0.4641		=>2.39334E-09	5359	0.5359
2.39334E-09 to 3.39316E-09	2783	0.2783		<=3.39316E-09	7424	0.7424		=>3.39316E-09	2576	0.2576
3.39316E-09 to 4.39298E-09	1328	0.1328		<=4.39298E-09	8752	0.8752		=>4.39298E-09	1248	0.1248
4.39298E-09 to 5.3928E-09	629	0.0629		<=5.3928E-09	9381	0.9381		=>5.3928E-09	619	0.0619
5.3928E-09 to 6.39262E-09	288	0.0288		<=6.39262E-09	9669	0.9669		=>6.39262E-09	331	0.0331
6.39262E-09 to 7.39244E-09	152	0.0152		<=7.39244E-09	9821	0.9821		=>7.39244E-09	179	0.0179
7.39244E-09 to 8.39226E-09	80	0.008		<=8.39226E-09	9901	0.9901		=>8.39226E-09	99	0.0099
8.39226E-09 to 9.39208E-09	36	0.0036		<=9.39208E-09	9937	0.9937		=>9.39208E-09	63	0.0063
9.39208E-09 to 1.03919E-08	27	0.0027		<=1.03919E-08	9964	0.9964		=>1.03919E-08	36	0.0036
1.03919E-08 to 1.13917E-08	9	0.0009		<=1.13917E-08	9973	0.9973		=>1.13917E-08	27	0.0027
1.13917E-08 to 1.23915E-08	11	0.0011		<=1.23915E-08	9984	0.9984		=>1.23915E-08	16	0.0016
1.23915E-08 to 1.33914E-08	6	0.0006		<=1.33914E-08	9990	0.999		=>1.33914E-08	10	0.001
1.33914E-08 to 1.43912E-08	3	0.0003		<=1.43912E-08	9993	0.9993		=>1.43912E-08	7	0.0007
1.43912E-08 to 1.5391E-08	2	0.0002		<=1.5391E-08	9995	0.9995		=>1.5391E-08	5	0.0005
1.5391E-08 to 1.63908E-08	1	0.0001		<=1.63908E-08	9996	0.9996		=>1.63908E-08	4	0.0004
1.63908E-08 to 1.73907E-08	2	0.0002		<=1.73907E-08	9998	0.9998		=>1.73907E-08	2	0.0002
1.73907E-08 to 1.83905E-08	0	0		<=1.83905E-08	9998	0.9998		=>1.83905E-08	2	0.0002
1.83905E-08 to 1.93903E-08	2	0.0002		<=1.93903E-08	10000	1		=>1.93903E-08	1	0.0001
>1.93903E-08	0	0
Bin Size	9.99821e-10
Number of bins	21
# of Sims	Avg Value	% Chg		Std Dev.	% Chg
125	2.90806e-09			1.49858e-09
250	2.90659e-09	-0.000505638		1.58035e-09	0.0545612
500	2.88312e-09	-0.00807468		1.48456e-09	-0.0606112
1000	2.83345e-09	-0.0172272		1.47777e-09	-0.00457562
2000	2.81076e-09	-0.00801001		1.48299e-09	0.00353
4000	2.81869e-09	0.00282223		1.55806e-09	0.0506263
8000	2.8129e-09	-0.00205458		1.5306e-09	-0.017627
10000	2.83464e-09	0.00772949		1.56239e-09	0.0207709

## Sheet: ADD_carc Results
ADD carc Results
Minimum result	2.47759e-10				1.58935e-09	Study value
Maximum result	1.22026e-08				0.5096	of results are equal or lower
Expected value	1.78388e-09				0.4904	of results are equal or greater
Std Deviation	9.83237e-10
Out of 10000 simulations		Of those with numeric values:
10000 had numeric values.			5% <=	7.01748e-10
0 had error values.			10% <=	8.39776e-10
			15% <=	9.46604e-10
			20% <=	1.0442e-09
			25% <=	1.13035e-09
			30% <=	1.21648e-09
			35% <=	1.30709e-09
			40% <=	1.39566e-09
			45% <=	1.47922e-09
			50% <=	1.568e-09
			55% <=	1.66831e-09
			60% <=	1.77017e-09
			65% <=	1.88577e-09
			70% <=	2.01376e-09
			75% <=	2.16031e-09
			80% <=	2.35241e-09
			85% <=	2.59965e-09
			90% <=	2.94135e-09
			95% <=	3.58564e-09
			100% <=	1.22026e-08
If ADD carc is:				1.58935e-09	0.5096	of results are equal or lower
(Chg to do what ifs)					0.4904	of results are greater
					Cumulative				Cumulative
ADD carc	frequency:				frequency:				frequency:
<=2.47759E-10	1	0.0001		<=2.47759E-10	1	0.0001		=>2.47759E-10	10000	1
2.47759E-10 to 8.76961E-10	1155	0.1155		<=8.76961E-10	1156	0.1156		=>8.76961E-10	8844	0.8844
8.76961E-10 to 1.50616E-09	3485	0.3485		<=1.50616E-09	4641	0.4641		=>1.50616E-09	5359	0.5359
1.50616E-09 to 2.13537E-09	2783	0.2783		<=2.13537E-09	7424	0.7424		=>2.13537E-09	2576	0.2576
2.13537E-09 to 2.76457E-09	1328	0.1328		<=2.76457E-09	8752	0.8752		=>2.76457E-09	1248	0.1248
2.76457E-09 to 3.39377E-09	629	0.0629		<=3.39377E-09	9381	0.9381		=>3.39377E-09	619	0.0619
3.39377E-09 to 4.02297E-09	288	0.0288		<=4.02297E-09	9669	0.9669		=>4.02297E-09	331	0.0331
4.02297E-09 to 4.65218E-09	152	0.0152		<=4.65218E-09	9821	0.9821		=>4.65218E-09	179	0.0179
4.65218E-09 to 5.28138E-09	80	0.008		<=5.28138E-09	9901	0.9901		=>5.28138E-09	99	0.0099
5.28138E-09 to 5.91058E-09	36	0.0036		<=5.91058E-09	9937	0.9937		=>5.91058E-09	63	0.0063
5.91058E-09 to 6.53978E-09	27	0.0027		<=6.53978E-09	9964	0.9964		=>6.53978E-09	36	0.0036
6.53978E-09 to 7.16898E-09	9	0.0009		<=7.16898E-09	9973	0.9973		=>7.16898E-09	27	0.0027
7.16898E-09 to 7.79819E-09	11	0.0011		<=7.79819E-09	9984	0.9984		=>7.79819E-09	16	0.0016
7.79819E-09 to 8.42739E-09	6	0.0006		<=8.42739E-09	9990	0.999		=>8.42739E-09	10	0.001
8.42739E-09 to 9.05659E-09	3	0.0003		<=9.05659E-09	9993	0.9993		=>9.05659E-09	7	0.0007
9.05659E-09 to 9.68579E-09	2	0.0002		<=9.68579E-09	9995	0.9995		=>9.68579E-09	5	0.0005
9.68579E-09 to 1.0315E-08	1	0.0001		<=1.0315E-08	9996	0.9996		=>1.0315E-08	4	0.0004
1.0315E-08 to 1.09442E-08	2	0.0002		<=1.09442E-08	9998	0.9998		=>1.09442E-08	2	0.0002
1.09442E-08 to 1.15734E-08	0	0		<=1.15734E-08	9998	0.9998		=>1.15734E-08	2	0.0002
1.15734E-08 to 1.22026E-08	2	0.0002		<=1.22026E-08	10000	1		=>1.22026E-08	1	0.0001
>1.22026E-08	0	0
Bin Size	6.29202e-10
Number of bins	21
# of Sims	Avg Value	% Chg		Std Dev.	% Chg
125	1.83009e-09			9.43082e-10
250	1.82916e-09	-0.000505638		9.94537e-10	0.0545612
500	1.81439e-09	-0.00807468		9.34257e-10	-0.0606112
1000	1.78313e-09	-0.0172272		9.29983e-10	-0.00457562
2000	1.76885e-09	-0.00801001		9.33265e-10	0.00353
4000	1.77384e-09	0.00282223		9.80513e-10	0.0506263
8000	1.7702e-09	-0.00205458		9.6323e-10	-0.017627
10000	1.78388e-09	0.00772949		9.83237e-10	0.0207709

## Sheet: CR Results
CR Results
Minimum result	2.06466e-11				1.32446e-10	Study value
Maximum result	1.01688e-09				0.5096	of results are equal or lower
Expected value	1.48657e-10				0.4904	of results are equal or greater
Std Deviation	8.19364e-11
Out of 10000 simulations		Of those with numeric values:
10000 had numeric values.			5% <=	5.8479e-11
0 had error values.			10% <=	6.99813e-11
			15% <=	7.88837e-11
			20% <=	8.70168e-11
			25% <=	9.41959e-11
			30% <=	1.01373e-10
			35% <=	1.08925e-10
			40% <=	1.16305e-10
			45% <=	1.23268e-10
			50% <=	1.30667e-10
			55% <=	1.39026e-10
			60% <=	1.47514e-10
			65% <=	1.57147e-10
			70% <=	1.67814e-10
			75% <=	1.80026e-10
			80% <=	1.96034e-10
			85% <=	2.16638e-10
			90% <=	2.45113e-10
			95% <=	2.98803e-10
			100% <=	1.01688e-09
If CR is:				1.32446e-10	0.5096	of results are equal or lower
(Chg to do what ifs)					0.4904	of results are greater
					Cumulative				Cumulative
CR	frequency:				frequency:				frequency:
<=2.06466E-11	1	0.0001		<=2.06466E-11	1	0.0001		=>2.06466E-11	10000	1
2.06466E-11 to 7.30801E-11	1155	0.1155		<=7.30801E-11	1156	0.1156		=>7.30801E-11	8844	0.8844
7.30801E-11 to 1.25514E-10	3485	0.3485		<=1.25514E-10	4641	0.4641		=>1.25514E-10	5359	0.5359
1.25514E-10 to 1.77947E-10	2783	0.2783		<=1.77947E-10	7424	0.7424		=>1.77947E-10	2576	0.2576
1.77947E-10 to 2.30381E-10	1328	0.1328		<=2.30381E-10	8752	0.8752		=>2.30381E-10	1248	0.1248
2.30381E-10 to 2.82814E-10	629	0.0629		<=2.82814E-10	9381	0.9381		=>2.82814E-10	619	0.0619
2.82814E-10 to 3.35248E-10	288	0.0288		<=3.35248E-10	9669	0.9669		=>3.35248E-10	331	0.0331
3.35248E-10 to 3.87681E-10	152	0.0152		<=3.87681E-10	9821	0.9821		=>3.87681E-10	179	0.0179
3.87681E-10 to 4.40115E-10	80	0.008		<=4.40115E-10	9901	0.9901		=>4.40115E-10	99	0.0099
4.40115E-10 to 4.92548E-10	36	0.0036		<=4.92548E-10	9937	0.9937		=>4.92548E-10	63	0.0063
4.92548E-10 to 5.44982E-10	27	0.0027		<=5.44982E-10	9964	0.9964		=>5.44982E-10	36	0.0036
5.44982E-10 to 5.97415E-10	9	0.0009		<=5.97415E-10	9973	0.9973		=>5.97415E-10	27	0.0027
5.97415E-10 to 6.49849E-10	11	0.0011		<=6.49849E-10	9984	0.9984		=>6.49849E-10	16	0.0016
6.49849E-10 to 7.02282E-10	6	0.0006		<=7.02282E-10	9990	0.999		=>7.02282E-10	10	0.001
7.02282E-10 to 7.54716E-10	3	0.0003		<=7.54716E-10	9993	0.9993		=>7.54716E-10	7	0.0007
7.54716E-10 to 8.07149E-10	2	0.0002		<=8.07149E-10	9995	0.9995		=>8.07149E-10	5	0.0005
8.07149E-10 to 8.59583E-10	1	0.0001		<=8.59583E-10	9996	0.9996		=>8.59583E-10	4	0.0004
8.59583E-10 to 9.12017E-10	2	0.0002		<=9.12017E-10	9998	0.9998		=>9.12017E-10	2	0.0002
9.12017E-10 to 9.6445E-10	0	0		<=9.6445E-10	9998	0.9998		=>9.6445E-10	2	0.0002
9.6445E-10 to 1.01688E-09	2	0.0002		<=1.01688E-09	10000	1		=>1.01688E-09	1	0.0001
>1.01688E-09	0	0
Bin Size	5.24335e-11
Number of bins	21
# of Sims	Avg Value	% Chg		Std Dev.	% Chg
125	1.52507e-10			7.85901e-11
250	1.5243e-10	-0.000505638		8.28781e-11	0.0545612
500	1.51199e-10	-0.00807468		7.78548e-11	-0.0606112
1000	1.48594e-10	-0.0172272		7.74985e-11	-0.00457562
2000	1.47404e-10	-0.00801001		7.77721e-11	0.00353
4000	1.4782e-10	0.00282223		8.17094e-11	0.0506263
8000	1.47517e-10	-0.00205458		8.02691e-11	-0.017627
10000	1.48657e-10	0.00772949		8.19364e-11	0.0207709

## Sheet: HQ Results
HQ Results
Minimum result	2.62464e-05				0.000168368	Study value
Maximum result	0.00129269				0.5096	of results are equal or lower
Expected value	0.000188976				0.4904	of results are equal or greater
Std Deviation	0.000104159
Out of 10000 simulations		Of those with numeric values:
10000 had numeric values.			5% <=	7.43398e-05
0 had error values.			10% <=	8.89619e-05
			15% <=	0.000100279
			20% <=	0.000110618
			25% <=	0.000119744
			30% <=	0.000128868
			35% <=	0.000138467
			40% <=	0.00014785
			45% <=	0.000156702
			50% <=	0.000166106
			55% <=	0.000176733
			60% <=	0.000187524
			65% <=	0.00019977
			70% <=	0.000213329
			75% <=	0.000228853
			80% <=	0.000249203
			85% <=	0.000275395
			90% <=	0.000311593
			95% <=	0.000379845
			100% <=	0.00129269
If HQ is:				0.000168368	0.5096	of results are equal or lower
(Chg to do what ifs)					0.4904	of results are greater
					Cumulative				Cumulative
HQ	frequency:				frequency:				frequency:
<=2.62464E-05	1	0.0001		<=2.62464E-05	1	0.0001		=>2.62464E-05	10000	1
2.62464E-05 to 9.29011E-05	1155	0.1155		<=9.29011E-05	1156	0.1156		=>9.29011E-05	8844	0.8844
9.29011E-05 to 0.000159556	3485	0.3485		<=0.000159556	4641	0.4641		=>0.000159556	5359	0.5359
0.000159556 to 0.000226211	2783	0.2783		<=0.000226211	7424	0.7424		=>0.000226211	2576	0.2576
0.000226211 to 0.000292865	1328	0.1328		<=0.000292865	8752	0.8752		=>0.000292865	1248	0.1248
0.000292865 to 0.00035952	629	0.0629		<=0.00035952	9381	0.9381		=>0.00035952	619	0.0619
0.00035952 to 0.000426175	288	0.0288		<=0.000426175	9669	0.9669		=>0.000426175	331	0.0331
0.000426175 to 0.000492829	152	0.0152		<=0.000492829	9821	0.9821		=>0.000492829	179	0.0179
0.000492829 to 0.000559484	80	0.008		<=0.000559484	9901	0.9901		=>0.000559484	99	0.0099
0.000559484 to 0.000626139	36	0.0036		<=0.000626139	9937	0.9937		=>0.000626139	63	0.0063
0.000626139 to 0.000692794	27	0.0027		<=0.000692794	9964	0.9964		=>0.000692794	36	0.0036
0.000692794 to 0.000759448	9	0.0009		<=0.000759448	9973	0.9973		=>0.000759448	27	0.0027
0.000759448 to 0.000826103	11	0.0011		<=0.000826103	9984	0.9984		=>0.000826103	16	0.0016
0.000826103 to 0.000892758	6	0.0006		<=0.000892758	9990	0.999		=>0.000892758	10	0.001
0.000892758 to 0.000959413	3	0.0003		<=0.000959413	9993	0.9993		=>0.000959413	7	0.0007
0.000959413 to 0.001026067	2	0.0002		<=0.001026067	9995	0.9995		=>0.001026067	5	0.0005
0.001026067 to 0.001092722	1	0.0001		<=0.001092722	9996	0.9996		=>0.001092722	4	0.0004
0.001092722 to 0.001159377	2	0.0002		<=0.001159377	9998	0.9998		=>0.001159377	2	0.0002
0.001159377 to 0.001226031	0	0		<=0.001226031	9998	0.9998		=>0.001226031	2	0.0002
0.001226031 to 0.001292686	2	0.0002		<=0.001292686	10000	1		=>0.001292686	1	0.0001
>0.001292686	0	0
Bin Size	6.66547e-05
Number of bins	21
# of Sims	Avg Value	% Chg		Std Dev.	% Chg
125	0.000193871			9.99056e-05
250	0.000193773	-0.000505638		0.000105357	0.0545612
500	0.000192208	-0.00807468		9.89708e-05	-0.0606112
1000	0.000188897	-0.0172272		9.8518e-05	-0.00457562
2000	0.000187384	-0.00801001		9.88657e-05	0.00353
4000	0.000187913	0.00282223		0.000103871	0.0506263
8000	0.000187526	-0.00205458		0.00010204	-0.017627
10000	0.000188976	0.00772949		0.000104159	0.0207709

## Sheet: Simulation Input Values 1
Sim #	BW	Conc	ED
1	80.8324	14.2887	28.8956
2	93.5367	16.9438	37.3842
3	103.785	22.7451	45.9898
4	50.0575	17.266	47.0134
5	83.4009	21.9366	49.6642
6	118.586	14.4091	61.2462
7	74.1692	21.3251	29.9264
8	95.4728	29.2416	58.2152
9	60.9584	10.0091	52.9262
10	65.6886	20.6817	40.0408
11	84.4937	8.40459	38.3372
12	44.2435	18.1753	31.0447
13	54.3164	13.375	32.7214
14	108.701	17.2607	37.6697
15	99.6453	13.3412	56.1531
16	53.5061	19.9729	39.9439
17	82.5631	14.3899	33.0835
18	103.355	15.794	32.0016
19	88.261	21.0623	45.286
20	57.9047	23.4584	51.6939
21	45.1224	14.9868	42.4995
22	80.2805	21.1256	46.7613
23	44.9969	19.6236	48.3103
24	30.6415	9.611	49.4397
25	36.1682	11.5928	35.4324
26	102.296	19.6458	38.0808
27	56.4365	13.9575	60.6673
28	102.946	17.2214	32.435
29	104.747	11.6157	51.9193
30	67.3423	13.6957	30.4085
31	47.8213	13.6105	34.9187
32	28.0577	13.45	23.6597
33	75.1357	18.8475	52.6809
34	53.3802	11.2116	54.88
35	55.7322	12.5414	48.059
36	35.4715	12.6085	63.1053
37	67.2502	11.4228	37.7725
38	42.7967	21.9908	65.8583
39	51.0799	18.8739	54.5209
40	124.082	15.9218	47.3204
41	29.7474	17.5916	44.6329
42	48.848	14.3814	42.5838
43	42.402	11.2314	55.2042
44	115.137	12.0877	39.6993
45	41.2591	14.7042	37.2084
46	72.7017	8.91085	56.3091
47	48.1658	18.2029	57.0174
48	75.8298	9.32141	48.9902
49	51.6275	19.282	63.0606
50	82.3602	14.3224	33.1687
51	49.7076	16.3568	41.3168
52	78.8224	23.1553	51.351
53	81.9623	20.8835	52.2863
54	116.407	13.2389	50.2267
55	77.4253	7.79713	39.3809
56	68.0329	14.5038	44.5317
57	85.1759	14.5073	56.3424
58	61.8454	8.95822	54.2001
59	83.351	10.1101	51.8312
60	32.4349	18.1577	55.7908
61	76.4894	19.9641	41.2861
62	46.042	13.4669	56.2709
63	100.763	10.2143	46.0643
64	101.248	25.2775	31.5177
65	45.4477	17.8385	31.2223
66	78.4198	13.4251	35.1929
67	75.6149	18.8093	46.9716
68	84.899	16.7622	59.1754
69	81.0548	11.9683	56.4731
70	59.2801	16.0166	48.7603
71	89.5153	13.5633	57.3947
72	72.3571	21.1925	57.5085
73	124.95	11.7185	48.2969
74	78.5305	14.9977	58.8864
75	82.8893	11.7979	37.8235
76	33.9525	10.3532	52.3319
77	44.0911	14.9875	29.9803
78	76.267	17.264	53.7951
79	76.6298	9.53883	40.1646
80	59.5146	18.4035	52.4318
81	66.4866	14.6123	42.7808
82	87.0209	15.9439	48.0431
83	68.2482	14.2761	50.5181
84	59.8342	13.1519	23.6264
85	53.3434	16.5441	63.1181
86	85.7734	15.563	51.5889
87	88.712	16.7026	58.5796
88	40.6148	20.0272	31.638
89	76.2857	16.1612	63.2599
90	69.8592	19.845	34.0667
91	59.0665	13.3766	60.6081
92	49.9706	19.465	41.3478
93	52.1126	15.5232	46.968
94	44.4288	12.8385	41.5215
95	88.7147	12.6652	45.1391
96	109.55	16.7519	29.759
97	63.1919	17.8014	52.272
98	40.997	16.6953	42.7785
99	65.5349	13.3639	66.6717
100	84.8562	8.05981	38.2762
101	52.7334	12.1192	39.2101
102	73.7907	18.897	47.2939
103	63.6288	15.3064	52.6012
104	71.1422	14.8285	57.4367
105	103.422	11.857	45.7138
106	48.025	21.9055	60.1009
107	81.1646	12.4934	25.2028
108	65.7364	22.7488	43.399
109	83.6549	11.9718	38.2118
110	59.7088	24.8782	64.337
111	73.4231	13.6707	45.582
112	79.0124	11.5203	47.4452
113	66.4399	15.7578	62.5148
114	58.1262	18.8208	37.3912
115	76.2042	12.8452	34.8032
116	97.7714	13.0721	41.2457
117	71.4801	17.2132	32.7055
118	85.3353	24.311	46.702
119	78.2642	9.71147	49.7578
120	66.4344	18.5813	53.3249
121	87.0632	11.3624	38.1784
122	96.7534	18.2776	45.0837
123	108.205	12.9275	35.4593
124	56.5416	15.7257	39.7915
125	58.864	19.9449	43.0049
126	94.7784	12.3489	39.9548
127	38.7607	20.9794	39.8734
128	96.7923	14.4298	23.1478
129	81.3345	17.9218	44.7846
130	69.2389	20.6768	62.4904
131	66.7379	25.7519	43.5695
132	105.371	17.4538	49.192
133	74.7941	19.8512	44.9748
134	118.827	13.0827	37.5896
135	72.5081	14.1686	60.1089
136	61.8937	20.1876	56.9542
137	61.1524	11.9356	46.8848
138	30.6175	16.7947	42.6715
139	69.5565	12.3082	43.3421
140	104.174	11.9077	27.5514
141	96.5791	9.91851	39.7586
142	50.4407	18.5752	34.1266
143	65.0684	16.7192	52.1
144	81.1041	22.7884	59.4426
145	35.4907	13.0955	39.4239
146	61.2687	18.0791	55.5882
147	74.1324	15.6483	47.465
148	49.6355	9.1662	40.8487
149	99.1788	26.6711	38.7067
150	97.9548	11.8245	43.0868
151	53.845	20.2846	37.291
152	90.3519	22.8318	32.2834
153	48.9469	10.4518	60.593
154	75.5138	10.8201	43.1583
155	69.3597	9.96008	36.5286
156	61.2796	19.3575	33.9495
157	34.964	11.4776	36.4952
158	19.2506	14.9541	39.12
159	61.2458	20.3708	53.4334
160	47.0021	18.8329	52.8305
161	78.806	13.1472	35.396
162	101.48	7.77011	41.4769
163	55.4878	15.0412	50.513
164	38.4028	11.4329	49.8385
165	88.0262	10.3696	37.8692
166	105.643	17.8844	30.1117
167	64.4312	21.3073	33.8895
168	112.785	12.0434	83.8433
169	117.544	12.6145	36.7809
170	82.954	12.039	64.5973
171	50.5883	22.5209	59.5032
172	64.3785	17.8248	42.9536
173	62.4745	19.8208	35.6171
174	70.0484	19.0767	57.0926
175	57.7072	11.3486	30.7964
176	83.0318	16.6679	53.8088
177	88.6412	17.6081	57.1969
178	80.0972	16.0167	43.3
179	86.0551	21.3346	36.3559
180	62.008	16.4687	61.735
181	83.9987	14.1759	66.5997
182	57.9014	14.8874	35.6604
183	85.061	18.8698	59.3516
184	51.5967	8.70383	24.5117
185	64.7362	10.772	34.1944
186	116.456	11.06	28.5027
187	83.2558	18.9511	57.9963
188	28.4224	22.1697	64.3745
189	97.8606	16.1125	58.6781
190	93.5741	13.6649	30.4171
191	85.0083	10.6512	32.9311
192	91.3526	16.2022	60.8835
193	56.1092	16.3516	41.0832
194	78.0578	13.0196	37.4419
195	39.0782	15.7895	44.8902
196	48.884	12.508	44.2469
197	72.0842	21.8409	49.3541
198	73.2495	14.9313	28.0025
199	65.449	10.5839	34.5698
200	93.1939	16.3347	40.6944
201	75.9372	29.8838	34.8911
202	66.7583	23.7646	35.6415
203	82.9891	21.5046	46.8164
204	70.2403	11.4202	51.7106
205	74.3104	16.5247	51.7071
206	87.1728	20.3264	44.5086
207	95.3712	12.2886	54.2016
208	90.9334	18.8883	58.8571
209	111.289	10.7328	35.7323
210	71.5016	19.1619	59.278
211	92.3324	18.8861	41.2566
212	59.6705	17.4341	42.7651
213	58.6998	13.9314	32.746
214	45.8081	25.3746	55.2882
215	58.5531	16.8381	23.2781
216	63.8056	20.5817	40.1861
217	81.6332	15.4129	47.4331
218	50.0026	17.1054	40.2849
219	45.9654	16.8725	30.6516
220	82.3014	8.40157	64.1619
221	92.1675	16.2647	45.0657
222	86.2183	17.2715	53.7808
223	39.9815	16.9418	36.2766
224	85.297	16.1269	41.1345
225	93.1278	18.2684	33.7044
226	123.375	19.4251	38.1147
227	70.9574	16.0853	54.7694
228	79.6744	16.7429	48.8094
229	73.7497	22.3043	42.5137
230	68.2283	19.4687	31.7825
231	31.219	11.4206	50.5229
232	65.9508	22.8151	45.7436
233	92.1455	20.9767	55.0242
234	51.716	14.3842	47.1156
235	93.3103	12.3554	59.5175
236	57.0866	15.5179	36.7475
237	61.9275	11.4596	37.2562
238	77.545	18.3275	47.5091
239	74.3291	17.2776	59.0434
240	67.2479	13.6764	43.7243
241	52.9819	19.092	47.3816
242	26.7159	22.7873	32.9607
243	99.7017	9.18329	53.8233
244	105.837	24.222	48.3898
245	58.5947	16.8816	49.4369
246	95.4317	8.79582	49.777
247	71.1184	19.4152	67.5062
248	105.969	19.1206	45.2117
249	66.8024	16.2232	46.0204
250	92.1841	9.80021	46.2918
251	80.2196	17.3571	34.0134
252	111.932	19.0798	72.4111
253	41.1053	16.5273	67.3427
254	74.0037	14.1938	36.3294
255	89.0584	14.3504	36.402
256	84.5767	16.5855	36.3844
257	60.1713	11.4246	37.6953
258	60.2561	11.4252	39.4711
259	90.7778	12.2722	51.8356
260	101.369	17.6505	50.0204
261	78.6351	7.56113	62.746
262	48.0862	16.6881	64.1092
263	96.8332	17.083	44.8792
264	73.8421	20.0859	58.0285
265	77.601	23.3607	41.5507
266	47.1397	17.0171	49.1112
267	65.746	13.4818	44.1828
268	51.3644	22.577	36.565
269	64.0662	22.2342	60.2594
270	74.8969	21.1278	36.2451
271	81.4921	19.3767	54.1569
272	98.531	21.4561	43.9833
273	113.965	15.1494	46.2472
274	86.1973	10.7976	31.8093
275	60.5694	15.4151	58.1905
276	61.596	22.3298	31.5271
277	81.1282	12.4405	44.1241
278	97.3433	18.4656	30.407
279	98.2668	21.4509	56.7775
280	72.3009	19.9361	54.8069
281	56.5163	14.3458	29.4924
282	71.0311	10.6911	70.8443
283	76.349	14.6994	38.2541
284	28.5092	17.0615	72.7687
285	75.8142	13.3131	42.8076
286	39.6886	15.1042	45.2888
287	74.3435	23.9288	28.4881
288	52.964	16.4301	54.9094
289	70.4958	11.3841	52.821
290	50.8942	8.35921	45.0357
291	97.6498	22.3933	42.4383
292	95.3395	22.5811	42.1558
293	68.2649	21.5859	45.3608
294	96.3571	20.1981	36.8778
295	42.0928	18.3077	45.703
296	90.9302	25.4653	39.9362
297	51.2001	19.9785	69.4053
298	59.2253	17.0244	48.5135
299	75.7168	12.4214	58.2162
300	81.4058	12.8947	48.1211
301	79.2301	14.0366	44.1735
302	70.1334	10.8342	46.6964
303	107.781	12.085	37.7383
304	64.3545	15.1243	65.3648
305	70.0967	17.732	54.9393
306	61.2536	17.8392	43.4667
307	73.7087	16.0758	60.4664
308	56.9403	22.2839	62.6729
309	48.8418	16.2551	31.3682
310	59.0093	19.6977	52.3393
311	63.0077	18.428	36.6359
312	68.7114	18.8504	65.2909
313	56.5903	15.7473	39.2105
314	64.3281	15.1608	56.1864
315	80.5342	17.9398	42.633
316	68.8783	21.0436	64.5101
317	104.768	10.8235	64.7535
318	63.6663	11.9687	34.3934
319	77.6537	17.9482	48.3147
320	127.081	15.4628	20.0226
321	96.113	18.8335	50.8594
322	60.1508	20.4555	47.694
323	47.1633	16.6652	34.644
324	55.2825	18.1819	43.6078
325	48.0023	11.7821	40.1306
326	56.729	11.2482	59.0329
327	50.4199	13.4697	38.0437
328	101.594	16.3132	57.9038
329	80.4617	26.4858	53.4993
330	56.2174	25.4834	55.721
331	80.1288	15.8038	36.4495
332	40.305	21.2056	48.7027
333	82.3844	19.5104	46.5066
334	70.7331	7.43044	25.5495
335	41.4452	12.8453	43.5293
336	86.4348	18.3717	41.241
337	68.0511	14.2544	29.4655
338	82.1014	16.687	49.8109
339	56.8426	18.0708	34.2536
340	52.6097	11.3746	42.3489
341	100.598	21.9645	39.577
342	62.8923	14.9665	40.6262
343	54.5401	15.1225	50.7414
344	42.6058	21.3376	51.1602
345	66.3857	6.74887	70.5118
346	103.741	14.0197	36.7883
347	63.195	14.7249	44.8674
348	64.2454	20.6282	37.4057
349	46.6381	14.9775	50.1152
350	107.853	7.77777	51.009
351	54.5823	19.262	35.4918
352	73.9072	10.5055	56.3227
353	100.209	11.7225	59.5793
354	71.2632	14.9731	38.2461
355	97.8519	13.5572	50.9935
356	70.7369	19.3881	31.7268
357	109.788	11.8517	65.2295
358	68.1552	20.0698	41.5026
359	110.159	14.2557	39.3527
360	56.6407	21.2028	29.3256
361	112.483	12.5517	47.487
362	43.8829	13.5035	46.5877
363	110.8	15.4371	48.4312
364	82.6551	22.1202	48.138
365	78.9932	23.0467	39.8388
366	48.2524	11.2111	58.1107
367	43.3919	14.7452	46.0393
368	70.67	17.8853	49.4438
369	52.7428	21.1153	39.9602
370	68.2699	11.0593	29.1187
371	80.7618	23.2946	32.2244
372	91.156	22.3245	61.6779
373	25.6847	24.1687	26.3069
374	112.176	23.9828	30.844
375	64.1125	12.778	29.166
376	82.1178	19.6539	53.9038
377	54.8441	17.7568	52.8338
378	66.0208	15.3871	51.4843
379	71.9794	6.39739	26.9752
380	88.8696	10.7635	48.3082
381	25.7535	11.142	40.1827
382	61.6558	15.1637	36.8028
383	59.1479	14.0521	51.6109
384	75.5211	14.6072	51.283
385	87.9336	16.6373	57.5371
386	131.815	12.1378	35.9401
387	60.1095	12.0806	35.9304
388	80.0238	11.7634	75.3748
389	74.8447	19.6464	37.021
390	74.0169	15.2827	51.9337
391	86.5405	17.4261	38.6626
392	34.6454	20.1838	36.5073
393	59.1928	13.2711	44.0238
394	74.5179	12.042	60.0991
395	79.2269	14.2667	51.881
396	77.7465	13.8466	64.996
397	107.309	12.8208	40.8915
398	55.1924	19.996	57.5716
399	47.533	15.6243	35.0401
400	71.1311	16.6328	41.4153
401	53.4813	30.816	45.223
402	74.5838	13.6551	51.2759
403	63.6999	15.1017	38.4263
404	46.7215	17.8704	50.9592
405	42.2236	15.2978	41.712
406	86.5752	23.2076	61.4502
407	49.3108	13.1311	53.8174
408	62.3269	18.3782	42.7966
409	51.4266	12.2878	54.9271
410	38.1772	21.4952	29.4802
411	66.3757	10.6835	37.7357
412	76.6514	17.2705	42.3882
413	88.9046	15.4568	48.4245
414	85.711	14.9956	47.5807
415	62.493	22.5121	56.1697
416	84.1055	14.5409	42.7924
417	75.1831	15.1717	46.1216
418	52.359	11.668	53.1638
419	58.799	14.5739	37.3673
420	84.2239	15.1315	56.3303
421	59.0539	6.53353	42.8041
422	76.4377	17.1944	40.754
423	73.7939	13.7075	31.1473
424	97.3042	13.9363	50.6595
425	98.4662	15.9152	49.0702
426	71.6919	23.0506	68.1916
427	75.9155	15.7323	33.894
428	85.4582	18.7998	55.1818
429	105.642	18.2208	62.6969
430	34.0883	10.8851	43.9136
431	107.268	19.4375	52.8301
432	66.141	12.9663	43.7937
433	51.0721	14.3193	48.1564
434	95.0994	12.2385	44.1495
435	104.213	16.5603	63.1946
436	93.8042	15.2504	20.2051
437	84.7036	16.608	37.6691
438	98.5963	20.6709	28.7468
439	53.5545	9.08677	40.4044
440	97.2041	16.7893	50.0118
441	72.279	24.7091	48.3284
442	30.5055	16.664	33.8366
443	106.858	17.1569	74.2667
444	74.4205	12.4696	47.3835
445	117.932	16.8301	35.1236
446	77.5762	17.832	39.0961
447	37.1252	16.0304	40.1378
448	59.5491	18.4631	51.4345
449	74.4992	19.8601	49.902
450	77.254	12.978	45.9143
451	42.7166	8.40186	49.7634
452	66.1293	21.4089	45.4662
453	28.8296	15.0742	36.2826
454	60.6265	18.3095	37.4511
455	72.9233	18.5445	46.5879
456	80.8325	8.333	62.4665
457	83.519	11.9845	42.7102
458	37.872	11.2655	43.1666
459	51.1047	23.398	27.4433
460	59.7134	12.466	57.221
461	57.8255	14.3363	25.6282
462	62.6798	15.2982	62.6383
463	34.9875	17.9771	43.8421
464	44.0306	18.1546	43.9889
465	58.3869	18.8149	46.1319
466	108.099	12.7212	41.1066
467	56.9047	17.1161	57.6298
468	106.108	17.1435	31.3796
469	85.1018	18.7454	35.3546
470	85.7093	13.5728	52.1313
471	52.526	14.1845	49.3688
472	62.7321	10.0177	45.1284
473	104.347	21.3615	35.3007
474	54.4698	11.9095	57.7559
475	48.7383	9.3247	46.0381
476	67.4794	14.5533	51.9456
477	78.9239	15.1272	42.1118
478	86.0362	8.82622	52.5449
479	106.948	11.7489	41.2255
480	45.4797	14.7872	22.5687
481	59.2072	14.3608	48.5633
482	86.2179	19.3877	30.2015
483	112.39	15.9431	60.0726
484	76.3016	15.0176	46.8087
485	89.5033	15.5859	33.2718
486	60.0218	14.0407	44.5662
487	65.332	16.0038	67.606
488	90.8677	9.93371	38.4225
489	58.5168	20.2527	45.0907
490	99.2237	15.0569	38.1219
491	77.0844	20.8856	54.7868
492	79.2576	17.2136	43.9097
493	53.3108	14.9762	38.4149
494	74.3705	12.9701	37.1127
495	28.8234	11.9119	47.036
496	92.9452	13.8665	27.7702
497	87.7193	11.3474	47.1378
498	117.647	18.675	33.0835
499	45.8579	12.3451	40.7861
500	78.0056	14.1664	51.6407
501	70.519	23.1105	39.4045
502	62.5989	18.9815	50.6984
503	71.3385	11.8027	36.1316
504	80.2829	15.6653	33.4949
505	36.937	19.0343	60.2847
506	78.326	15.0607	44.065
507	76.5521	20.5566	30.2652
508	76.3256	13.8561	37.8565
509	32.7691	18.1556	35.1905
510	57.9932	19.7373	33.9895
511	88.9161	11.6713	42.8451
512	49.111	19.5687	38.6669
513	120.185	12.4421	31.9888
514	88.5582	15.4356	65.0339
515	78.3021	17.8986	53.7033
516	58.4381	16.982	30.7695
517	70.0166	18.3078	54.9842
518	50.0861	19.8848	35.7165
519	101.582	15.9971	52.1052
520	84.6417	9.59917	64.3303
521	89.8139	19.238	35.4961
522	115	10.1299	55.6184
523	63.2739	10.8694	60.8472
524	85.5069	24.5055	39.9604
525	72.7807	7.93721	60.0642
526	44.6095	17.7132	24.7143
527	81.4095	22.1152	33.5739
528	46.6934	12.3014	60.6216
529	60.4777	17.4149	61.3628
530	59.0259	12.5486	57.0656
531	67.4208	22.1155	33.1487
532	103.076	12.7633	39.0592
533	73.9775	17.474	46.6499
534	61.1354	13.1382	25.5094
535	76.4432	21.3238	48.4109
536	53.1937	13.1102	44.0228
537	41.9848	16.9996	45.6728
538	78.484	15.8925	50.7094
539	72.0103	15.4787	45.6211
540	51.4801	7.55153	59.8174
541	66.0671	15.1988	44.9582
542	100.926	18.2892	47.8519
543	35.7829	18.6876	50.252
544	79.2194	17.4859	58.4983
545	83.3515	16.7382	51.0433
546	54.7071	18.9617	39.3651
547	42.2851	20.2586	45.7527
548	68.9241	21.6736	55.1936
549	80.7897	12.6783	56.6085
550	40.5218	23.3583	33.1193
551	39.8672	8.30981	32.9015
552	72.7037	16.2463	25.6659
553	42.9108	10.7123	39.89
554	38.883	15.8173	48.3389
555	27.9467	16.8841	56.0469
556	40.3141	21.2612	30.0942
557	56.8227	16.112	45.7996
558	69.686	20.8286	51.5067
559	49.1434	15.8964	56.4233
560	74.3306	19.5229	37.1349
561	108.396	19.1151	43.7483
562	73.5293	20.3192	65.6634
563	72.0375	18.8246	27.3141
564	91.2697	20.6293	35.0313
565	70.6915	21.1817	58.7505
566	78.1304	9.36236	47.1116
567	78.6346	16.246	65.2017
568	110.684	16.0269	45.0846
569	64.2164	16.8934	40.3203
570	54.3164	12.5039	59.4272
571	94.8931	19.6686	24.2562
572	109.745	17.3549	48.3054
573	68.0233	23.3017	43.37
574	59.1214	17.9649	41.2468
575	92.2149	17.0987	34.8714
576	75.1611	17.0179	35.5612
577	93.1833	20.6754	37.2762
578	63.9963	16.8252	33.0391
579	44.1284	12.7755	44.7975
580	109.698	18.0372	44.5249
581	51.105	13.8013	38.8813
582	89.3878	14.1432	42.7363
583	64.643	9.96	56.5062
584	111.103	10.7826	45.6234
585	83.8169	16.3511	62.6534
586	77.8494	12.8116	43.4904
587	99.5599	14.8483	56.6963
588	87.5188	10.086	40.507
589	88.7407	14.7335	58.1146
590	32.767	18.3843	28.3393
591	63.1116	17.4147	45.0641
592	46.1478	16.7542	56.4572
593	61.0886	20.7929	56.9203
594	95.3084	13.1049	62.1734
595	93.7456	17.3032	54.5872
596	44.7906	17.4147	41.4884
597	67.4055	12.5992	40.6893
598	54.6879	15.5033	38.621
599	88.9756	18.3506	48.3223
600	60.1244	8.28832	28.0091
601	60.553	13.2904	55.4765
602	80.357	14.0481	59.4684
603	101.223	9.09984	25.37
604	50.5707	15.5379	40.3188
605	76.2727	10.4751	33.1879
606	115.512	9.81879	35.4727
607	58.1697	8.35421	53.5971
608	92.0229	21.2956	54.8619
609	99.2785	17.8982	49.313
610	88.3223	18.8134	60.9576
611	86.5087	14.0675	39.8467
612	71.1206	18.8144	42.8263
613	53.9462	9.90231	30.9494
614	103.822	12.5757	38.0667
615	72.1484	22.4734	40.0218
616	90.719	15.1767	36.4285
617	53.4	13.2072	51.219
618	78.4549	9.34936	47.5095
619	63.6374	16.6824	44.2896
620	88.126	10.9832	31.9161
621	58.3437	15.4059	52.9158
622	67.1889	16.6102	32.4259
623	54.2964	10.1066	40.48
624	76.9665	10.5896	49.1798
625	51.2706	12.6064	50.9355
626	75.6604	23.8888	37.4402
627	99.9003	18.3741	34.9779
628	84.0682	15.5475	32.8238
629	78.9232	18.1658	50.5784
630	59.009	16.073	31.6926
631	53.4453	19.2742	58.5723
632	84.3998	22.1139	38.7246
633	83.2264	19.1448	41.4303
634	59.6828	7.67871	54.003
635	72.833	18.9066	64.6457
636	51.6186	10.4362	48.3297
637	81.3272	20.0838	26.5047
638	63.5238	10.7075	41.6751
639	90.2262	15.2271	61.9798
640	89.1079	15.8105	47.7636
641	27.6431	16.2997	33.9606
642	110.132	12.7474	55.6274
643	85.9972	16.0221	55.3028
644	81.4567	9.91179	57.2552
645	92.4224	8.06515	55.6001
646	65.3586	17.1267	50.1442
647	49.995	11.3598	60.3528
648	30.6633	17.975	51.5687
649	49.5003	11.3059	57.1397
650	90.3313	16.0955	33.756
651	84.3088	10.6577	61.2291
652	32.0748	13.2537	54.1825
653	122.063	11.5446	62.4787
654	98.3877	23.0844	50.2462
655	88.5692	23.6006	35.0523
656	95.4939	19.7072	30.0883
657	57.0522	16.6221	21.3847
658	72.2095	12.2018	36.6789
659	80.372	14.8801	36.7226
660	39.3309	22.2015	38.1307
661	21.9805	12.1646	72.4988
662	81.2507	12.4214	43.814
663	107.862	14.1356	47.7109
664	58.8181	13.2157	64.2727
665	52.4744	17.5268	48.9112
666	90.5965	17.158	47.9397
667	62.6457	16.2646	55.6989
668	101.836	17.7843	35.4614
669	89.8102	17.2595	37.8425
670	64.9791	22.4159	41.0323
671	128.227	20.4212	43.9879
672	51.2328	18.773	27.2746
673	81.0042	13.8603	63.4833
674	73.7717	14.8921	49.758
675	66.8139	15.7763	49.084
676	100.919	15.5443	53.2309
677	78.9973	9.97289	44.6246
678	64.801	15.7021	43.0139
679	101.963	12.905	34.5395
680	72.2907	18.6606	50.0065
681	83.0885	13.7314	35.9499
682	78.5267	11.1453	31.8946
683	64.9384	16.8111	55.6914
684	79.0424	14.3634	32.4048
685	84.1451	20.9882	72.3135
686	66.5765	22.7139	37.275
687	26.7311	14.2946	64.9204
688	68.6054	22.574	39.8977
689	71.5439	13.5105	28.0753
690	86.8719	24.3952	49.5292
691	40.2153	12.1014	37.6059
692	123.183	19.3669	56.8855
693	60.9024	14.0261	36.7977
694	54.332	16.5733	47.5888
695	85.0423	18.0775	39.5131
696	38.516	17.159	61.548
697	48.2354	13.1874	49.8544
698	48.1252	16.3442	35.5438
699	74.2474	9.32018	27.2951
700	106.372	20.5789	46.5409
701	83.2286	15.1117	39.5003
702	75.3553	23.338	57.2112
703	92.4241	11.467	49.6181
704	63.9958	24.3991	62.3286
705	22.4769	16.8962	35.2111
706	77.62	15.3412	30.5435
707	65.2612	14.214	37.1769
708	87.7198	22.6059	37.3879
709	59.618	8.61464	56.6582
710	64.0918	19.2323	34.3348
711	107.11	9.64029	46.3859
712	60.812	19.1941	23.507
713	79.1273	16.6708	41.4501
714	55.5507	17.2598	64.0562
715	57.9432	20.8182	56.2626
716	57.1617	10.6761	32.8251
717	75.6056	19.7144	40.5895
718	47.2225	11.8531	34.5034
719	80.6251	14.0269	31.5036
720	95.6996	17.4346	38.9581
721	90.9173	19.3859	74.0342
722	77.8898	17.2373	48.0172
723	61.7216	15.5836	50.9282
724	47.5005	13.0243	60.6442
725	84.2404	16.2614	50.787
726	134.889	24.3009	40.6873
727	99.8234	10.5887	46.4047
728	72.1318	21.9354	46.7522
729	54.67	8.98297	44.655
730	60.9284	16.918	38.9915
731	91.0041	21.6121	64.7379
732	67.0673	12.3616	41.5373
733	76.3326	23.7955	47.8291
734	76.1795	16.6767	32.875
735	78.3947	10.5496	30.227
736	60.5633	14.9771	57.1765
737	74.0305	16.3066	31.4837
738	85.2221	16.7998	44.1828
739	65.9394	14.4966	37.2625
740	89.3514	7.00445	52.3437
741	88.6788	25.3775	33.515
742	70.0386	16.9668	45.3517
743	88.1152	15.7293	61.7975
744	66.7278	19.7371	35.8215
745	77.784	15.8399	37.8488
746	88.2591	16.8176	46.6654
747	63.9269	13.5816	45.455
748	66.6252	15.5554	59.2599
749	41.4064	10.4144	68.4641
750	79.2088	16.5213	52.6608
751	48.7464	16.1486	55.0721
752	63.7065	19.3248	40.0386
753	79.6798	19.229	57.6432
754	55.2968	21.3765	36.1471
755	54.5228	17.3905	40.4587
756	128.99	21.1846	48.6088
757	88.2087	9.94153	44.5401
758	70.0051	19.4166	43.1076
759	78.2652	11.0816	44.3085
760	66.692	9.72013	45.9279
761	52.2598	11.761	60.6116
762	82.0685	11.9213	53.6293
763	75.1056	10.0099	37.3912
764	90.2465	16.939	24.9536
765	89.1519	15.7002	49.295
766	90.6078	15.0642	57.0488
767	90.0763	9.20636	44.3597
768	75.115	20.5675	45.9661
769	72.5584	17.9517	52.5576
770	56.5693	17.2119	46.8047
771	84.7292	7.78013	32.363
772	78.3274	12.1184	47.7487
773	79.1852	11.311	46.9436
774	90.2951	18.0697	58.2447
775	97.3669	20.4812	46.974
776	73.3108	18.4616	27.9973
777	91.3726	13.9564	45.8554
778	44.31	22.7848	43.2466
779	55.2965	17.0337	48.4317
780	39.4212	18.1252	68.2092
781	59.1918	8.09503	60.5266
782	55.1833	14.1547	46.5063
783	65.7773	14.1773	41.4437
784	70.6661	12.2391	33.1366
785	63.9536	10.535	60.6203
786	99.492	27.1655	50.7336
787	48.8814	23.0922	53.341
788	98.7141	13.7548	56.2898
789	51.4947	11.6781	48.0652
790	121.948	13.0371	36.5114
791	83.8656	14.9198	52.9338
792	85.1786	21.1122	63.3755
793	60.0371	11.5169	41.4271
794	53.6937	20.445	51.6384
795	67.4895	15.8951	47.7952
796	84.0174	12.3421	53.1845
797	38.404	8.85917	55.4806
798	58.8736	9.67558	41.4758
799	34.8124	16.3137	42.3639
800	57.8452	14.039	53.4459
801	78.8082	15.0154	40.6051
802	71.7323	20.4671	48.311
803	75.5605	10.5619	31.1511
804	73.7045	6.32301	33.9459
805	39.1627	20.8306	44.2634
806	83.037	13.4354	54.5522
807	123.645	15.8726	48.1995
808	98.6176	12.6392	36.7144
809	61.1293	17.2601	44.7465
810	68.1227	15.5782	56.2239
811	97.404	16.9916	56.9357
812	57.3553	16.1735	65.5849
813	105.662	20.2503	39.3615
814	66.8271	24.6183	61.0159
815	89.5571	9.76645	46.2908
816	77.3281	10.6664	30.9953
817	75.4297	17.5797	47.3813
818	48.2514	20.9206	48.9305
819	56.7372	20.4354	50.1537
820	88.0095	17.4798	34.9859
821	53.2421	22.2958	72.8065
822	99.7779	10.0649	32.3331
823	90.5498	17.3251	49.3628
824	74.6086	24.9634	78.4847
825	41.136	21.0508	23.7058
826	94.5771	20.4959	57.9349
827	67.6654	7.87865	43.556
828	101.367	13.538	41.4705
829	78.939	12.7793	49.7627
830	71.8194	13.0474	37.3924
831	37.0372	16.6715	31.5629
832	79.1036	17.1851	57.3609
833	78.5874	16.7517	44.5893
834	63.093	16.3712	51.3629
835	75.6011	12.144	47.4434
836	116.729	11.1699	33.9568
837	87.9183	18.2039	34.4486
838	92.4827	9.02414	21.9427
839	85.6695	23.0041	44.1966
840	101.797	13.9294	42.4415
841	66.3993	16.5102	26.4288
842	71.2237	21.4401	61.1018
843	84.8305	18.734	45.0462
844	56.0682	22.6254	55.2092
845	69.1208	13.4709	61.051
846	64.6511	16.3261	52.6202
847	78.7165	19.4219	58.4319
848	54.1069	13.0095	51.5206
849	83.0047	16.0367	34.0333
850	85.1175	16.1938	40.5545
851	92.7743	9.69742	41.4596
852	33.7245	16.6694	37.6317
853	94.5255	10.2453	60.9101
854	96.0832	15.8683	50.4289
855	92.0578	20.999	45.3438
856	108.929	17.6989	38.7357
857	80.9143	18.7985	48.2
858	94.2513	13.6651	52.0444
859	107.166	14.329	77.6377
860	68.8162	27.0131	37.6123
861	68.1968	9.41656	48.1512
862	38.7662	14.9493	52.9078
863	88.1522	14.9187	54.496
864	77.169	22.2428	23.8886
865	51.6553	16.2792	35.9293
866	77.513	15.1891	55.9006
867	60.0835	6.27285	38.9209
868	63.13	11.0153	40.5716
869	96.291	13.9616	62.4455
870	84.4732	20.8811	25.1922
871	117.814	16.3809	44.9416
872	117.671	12.5668	50.8009
873	82.177	10.5849	53.3237
874	76.8732	8.50205	57.0177
875	58.8612	14.4649	50.2521
876	47.4998	15.4048	52.7104
877	64.6637	11.1203	55.6513
878	81.0806	17.9471	25.2592
879	85.5074	18.626	58.0821
880	81.0939	20.0076	55.1719
881	93.3666	17.6074	37.6012
882	70.6188	15.082	32.0079
883	53.0862	6.14841	54.5189
884	68.946	17.0542	53.1692
885	88.9031	12.4767	24.1422
886	57.0099	14.3349	38.8837
887	76.4301	8.65706	56.2972
888	73.3342	15.618	46.2819
889	118.436	18.8103	55.8437
890	84.4528	13.4619	38.1516
891	41.9797	22.0945	55.6783
892	80.022	17.6073	35.6311
893	53.9108	11.489	28.9519
894	39.3652	16.4106	38.2909
895	75.7402	19.2981	29.4445
896	108.459	9.48183	47.4082
897	107.744	10.3082	44.4208
898	42.6716	19.1269	47.4564
899	78.6442	15.7097	26.6911
900	66.937	14.4717	42.8001
901	95.1306	21.5413	43.1577
902	42.1662	22.8067	41.8148
903	38.502	13.133	39.7717
904	43.6031	22.3033	34.6386
905	106.107	10.5367	34.1825
906	84.5855	21.7727	49.3388
907	85.6313	11.3376	36.3157
908	103.353	16.5048	48.1724
909	63.1608	18.6454	50.4425
910	103.383	20.4596	54.9345
911	112	24.099	23.5226
912	77.1242	22.298	39.0889
913	88.033	17.7877	65.384
914	68.5473	20.2417	26.4186
915	59.0373	16.4715	42.9148
916	80.6397	24.4747	36.352
917	75.023	14.3196	43.2779
918	46.28	14.4307	38.7963
919	84.0632	18.6036	38.5087
920	84.3748	16.7726	49.8288
921	34.6627	12.3386	48.1398
922	55.4358	14.362	32.3756
923	93.488	18.4822	56.4648
924	62.5896	24.6034	38.0482
925	84.1614	18.504	57.6118
926	74.5527	13.9527	43.5384
927	42.5119	12.4914	35.8986
928	58.7207	19.3416	49.7438
929	88.6597	16.7718	55.9468
930	86.2668	12.5953	37.1893
931	96.455	7.65521	42.6891
932	47.0461	13.0333	49.52
933	61.3358	17.2206	36.2912
934	88.0076	16.1922	35.9841
935	100.451	20.2179	74.8566
936	19.2872	12.6484	47.9038
937	80.2257	21.2874	44.0717
938	90.8008	22.88	38.003
939	91.1978	18.067	44.3344
940	61.6291	11.138	35.8033
941	74.306	18.1512	37.1073
942	71.3786	16.1993	36.9916
943	57.2598	8.17256	33.8443
944	86.4542	8.14091	54.3389
945	90.976	16.7882	36.7907
946	58.3056	17.9371	30.4535
947	71.4023	16.1795	54.9041
948	50.4475	15.6934	73.0203
949	45.5614	15.5311	56.101
950	64.896	14.2339	54.226
951	111.307	12.8888	56.5013
952	48.6424	6.42398	56.5821
953	56.2064	6.98282	39.5
954	70.4982	13.1422	34.0979
955	54.3339	10.6758	37.0794
956	86.9369	16.6501	52.5517
957	72.4501	10.1398	30.9168
958	77.4552	6.46357	43.1774
959	97.9057	16.2629	43.4023
960	77.024	16.4998	21.9429
961	76.7395	18.2587	46.6989
962	61.6293	16.1184	46.7533
963	52.3909	14.0643	47.8773
964	43.892	19.8956	49.7154
965	67.912	21.7848	47.5331
966	50.0662	24.1105	33.6821
967	69.5712	8.19804	32.9948
968	24.7397	23.4663	46.0963
969	51.6401	22.7412	39.1569
970	73.2251	15.9173	79.2749
971	109.613	11.2873	51.8004
972	59.1105	8.50514	41.5893
973	103.141	16.658	42.6925
974	86.1955	22.8198	38.9454
975	63.7107	10.981	27.7506
976	27.1533	9.2855	36.5996
977	62.9758	11.3457	61.9578
978	28.4078	10.8942	34.0016
979	107.724	14.3071	69.8797
980	46.0268	22.2234	28.2402
981	65.5265	25.1277	44.5616
982	63.4262	12.2209	48.6061
983	62.179	21.396	41.0847
984	51.6555	11.1228	58.9234
985	45.0456	6.3234	42.3691
986	52.3851	16.8696	45.8943
987	55.5696	9.34688	57.2452
988	53.6944	12.084	28.2237
989	55.7238	14.4036	56.7917
990	93.5248	14.1411	55.3626
991	60.5836	18.229	33.8704
992	68.989	19.3336	37.2299
993	95.4697	21.6037	58.0702
994	94.5655	19.6485	56.2548
995	117.046	10.8655	32.028
996	72.0269	15.791	33.4034
997	78.5982	21.4564	57.0732
998	88.5272	11.7999	60.7205
999	83.9758	19.8265	41.9846
1000	82.3535	21.3111	69.8149
1001	98.2574	14.42	34.2114
1002	48.8084	20.8485	38.6485
1003	58.4167	25.422	30.6312
1004	78.9659	15.1751	57.0998
1005	65.9754	14.9439	32.1342
1006	85.3871	15.5232	29.7014
1007	75.0143	17.7982	29.7499
1008	47.8882	12.054	43.0361
1009	108.847	18.135	33.0497
1010	112.745	16.932	58.9609
1011	68.1495	6.47159	40.766
1012	60.3918	25.0077	48.6458
1013	65.3562	10.4271	54.7149
1014	71.4375	10.2557	61.624
1015	74.9904	8.87897	64.7889
1016	95.1852	18.4673	54.8558
1017	53.6055	12.3043	45.4352
1018	37.247	9.57797	50.2666
1019	49.4518	16.9102	22.9518
1020	61.0281	10.801	61.4387
1021	83.205	8.20674	41.2807
1022	118.586	15.402	60.3944
1023	63.2717	17.5631	51.4724
1024	88.5458	16.1398	57.1161
1025	133.598	16.9121	61.5499
1026	57.7756	15.1909	41.6895
1027	73.345	12.4062	42.3803
1028	52.9429	16.3581	51.8803
1029	67.3689	11.0328	52.6294
1030	57.3966	25.6878	22.9625
1031	76.0246	17.9404	67.8192
1032	60.0747	14.0028	54.5631
1033	73.5798	16.1595	32.9482
1034	37.8924	11.9477	31.1265
1035	93.495	11.1698	45.594
1036	84.5329	22.8687	37.9779
1037	57.4881	18.4587	36.8091
1038	80.0981	18.663	44.4405
1039	80.8892	20.3724	54.3349
1040	78.0561	19.5912	54.7928
1041	115.569	12.4602	40.5819
1042	47.5471	16.3515	57.8003
1043	79.4644	10.0645	35.1163
1044	77.5657	14.9957	71.327
1045	105.066	20.4078	46.3804
1046	51.6422	15.3245	35.9135
1047	94.2349	15.2513	24.5416
1048	67.7346	18.9589	33.1685
1049	104.699	13.5224	44.7224
1050	29.5318	16.9378	43.1879
1051	34.9857	7.80775	45.2787
1052	61.6925	10.0392	53.3612
1053	102.684	17.3172	43.0535
1054	56.1834	17.6485	73.5506
1055	87.1207	13.1037	43.6969
1056	50.1867	13.0761	56.4569
1057	77.1459	17.757	63.6189
1058	68.2563	14.4227	50.1271
1059	38.0486	13.271	39.3434
1060	80.1854	14.7088	44.5366
1061	65.3702	7.62114	44.0364
1062	116.247	14.0796	47.6957
1063	75.9249	19.242	49.6377
1064	113.75	7.71241	44.942
1065	70.4075	10.41	57.9635
1066	67.6611	18.3818	38.5683
1067	100.556	12.2027	51.1327
1068	70.0386	15.1089	42.411
1069	130.309	14.9074	60.8569
1070	37.2333	11.124	48.9499
1071	81.3698	13.581	21.9257
1072	57.7316	13.9531	47.4367
1073	77.1806	9.94745	42.262
1074	117.287	10.813	32.6645
1075	69.7288	17.584	48.9025
1076	69.4155	17.7874	49.415
1077	84.2577	18.5963	35.07
1078	68.1208	15.9794	39.8145
1079	79.6303	24.8027	40.9677
1080	85.3331	10.9772	37.6316
1081	59.039	8.38541	63.783
1082	85.0831	16.2747	37.4191
1083	75.6158	18.9461	69.448
1084	70.5311	16.7551	49.744
1085	80.2198	6.14688	49.2915
1086	88.2116	23.7268	33.5503
1087	54.535	14.5691	20.3259
1088	56.7649	14.7483	44.8806
1089	109.871	13.9579	44.2251
1090	72.7463	20.3096	60.6469
1091	66.8105	10.7262	50.4574
1092	74.825	16.3916	49.2956
1093	72.8414	14.9362	53.9983
1094	77.4032	11.9064	52.8809
1095	105.195	12.2759	25.9231
1096	51.4066	9.4837	48.4775
1097	85.6544	10.3116	44.3516
1098	44.406	18.305	54.5773
1099	89.597	15.2221	53.5754
1100	75.8478	9.90778	52.6507
1101	73.9537	20.617	47.3921
1102	75.5588	19.3915	45.7098
1103	98.4258	16.9118	43.406
1104	110.025	17.8705	56.6444
1105	42.2823	12.56	32.1105
1106	97.1059	13.1262	58.9226
1107	86.9706	18.7452	47.2916
1108	79.4502	12.1751	41.999
1109	89.2712	9.37428	64.2899
1110	90.7309	21.6023	55.3982
1111	99.2502	14.5033	32.3377
1112	85.7914	13.9928	73.6302
1113	81.7834	14.6668	47.1343
1114	103.407	18.524	58.3747
1115	68.7838	20.307	43.7095
1116	81.088	19.5997	53.4275
1117	98.4151	9.3974	40.4535
1118	25.5782	23.1614	45.0344
1119	80.4042	21.519	68.8741
1120	77.0558	24.7397	32.4183
1121	98.688	15.2613	53.4265
1122	86.7625	15.4881	45.1117
1123	73.6054	13.8598	32.3647
1124	70.0897	12.3462	44.0169
1125	66.3651	13.831	51.1013
1126	134.047	13.4691	61.6982
1127	46.5398	15.4492	50.4859
1128	87.771	13.6198	61.1948
1129	68.6243	16.3539	54.3411
1130	56.7228	19.4082	51.187
1131	22.784	6.5423	33.285
1132	91.5715	15.333	41.0813
1133	63.1074	8.70835	42.3062
1134	95.5216	14.4662	38.1364
1135	101.837	12.9053	39.6941
1136	62.2609	18.336	69.7206
1137	112.017	11.7775	49.5503
1138	98.5299	18.3518	54.927
1139	73.0423	16.5775	55.9866
1140	53.1699	16.5025	55.015
1141	54.2689	12.8464	55.6778
1142	101.613	18.0844	43.7174
1143	78.8764	24.345	39.8542
1144	74.9321	20.1865	54.3906
1145	82.6019	13.5846	65.4165
1146	56.8332	9.9478	55.4736
1147	71.9253	9.24924	46.1335
1148	32.6952	18.5101	52.1354
1149	87.3954	11.9452	53.3897
1150	62.4562	12.6667	58.4902
1151	70.9497	13.7671	57.4942
1152	66.9926	12.6686	26.7366
1153	88.0974	20.4102	47.5024
1154	68.9624	7.62158	62.5164
1155	93.2139	14.3691	30.6608
1156	56.7783	19.2983	30.4603
1157	72.3214	19.8649	58.4998
1158	77.1583	9.918	64.2677
1159	96.6773	18.6508	42.4297
1160	39.5872	23.1104	43.0668
1161	105.216	10.4474	57.6266
1162	83.2821	14.2738	30.1285
1163	60.3948	18.3132	44.3987
1164	79.9285	18.1723	45.9005
1165	55.7524	12.6089	37.5553
1166	91.4561	15.5125	56.1943
1167	78.9868	9.83932	43.7985
1168	88.7298	18.8069	61.9589
1169	70.967	14.5142	54.8629
1170	59.398	14.1801	24.6994
1171	45.0063	24.8269	46.3188
1172	47.0562	16.6692	45.3609
1173	64.655	19.324	37.1893
1174	104.236	12.9568	45.7369
1175	108.848	15.5154	47.6438
1176	112.241	20.7835	67.927
1177	80.1978	14.9088	48.7006
1178	77.9663	17.153	31.3662
1179	100.327	9.82263	33.3192
1180	89.1861	16.7138	30.4757
1181	52.544	21.2995	52.3361
1182	75.9287	16.1315	51.7959
1183	95.0805	19.1737	38.4531
1184	82.9065	19.7704	41.5803
1185	63.69	13.2049	47.9207
1186	73.3842	20.7008	62.9427
1187	60.4404	18.75	36.0014
1188	39.8758	19.7196	49.5343
1189	71.4807	18.9585	39.1447
1190	92.0884	15.2696	42.2403
1191	112.944	15.3429	46.0001
1192	69.5822	15.7025	56.7702
1193	88.1922	24.8856	37.4688
1194	109.05	19.555	58.022
1195	91.1036	20.9879	41.2384
1196	74.9576	10.5857	63.4241
1197	55.118	7.6805	46.8983
1198	61.3698	17.9289	31.7337
1199	37.6035	20.2685	73.952
1200	82.9177	11.3594	36.448
1201	23.8771	16.8535	51.1401
1202	44.6284	14.1605	48.4858
1203	89.1045	22.9481	51.4576
1204	65.6448	15.8252	50.0599
1205	34.821	12.19	44.3084
1206	82.359	19.5821	49.4982
1207	68.9953	14.718	49.5402
1208	54.0262	21.1368	54.5883
1209	82.6987	23.6423	30.9827
1210	103.305	11.8836	53.2328
1211	98.7713	14.7986	39.6684
1212	99.2237	15.6705	49.2065
1213	93.9856	12.2693	54.9578
1214	39.3426	20.4524	39.6455
1215	72.7649	15.7099	74.8538
1216	84.3024	7.07517	59.1119
1217	59.7114	23.1424	37.9656
1218	79.7414	10.5583	40.2231
1219	79.9731	13.5854	50.8313
1220	33.7966	18.1936	45.8473
1221	50.3791	20.4172	51.0582
1222	81.3281	20.057	49.2609
1223	56.9939	17.6164	60.9319
1224	60.157	19.9596	41.3
1225	91.1341	10.4807	65.3139
1226	55.111	17.9183	35.6886
1227	94.9851	17.4265	39.2972
1228	105.192	13.7378	36.4588
1229	89.3534	12.8921	26.6169
1230	46.8326	11.7024	53.4422
1231	84.036	12.3308	58.4783
1232	105.028	19.9829	23.9784
1233	52.3623	11.7295	50.3872
1234	104.935	17.0468	50.2726
1235	52.9992	22.4701	27.2035
1236	61.4854	17.523	43.2021
1237	51.8723	16.5229	34.9192
1238	51.0592	13.7803	67.2907
1239	73.5373	19.5789	48.1999
1240	23.1366	14.577	40.0548
1241	91.0955	15.4564	56.5421
1242	90.8889	14.0674	58.9089
1243	80.3174	18.0926	57.7004
1244	35.3285	15.9511	26.7166
1245	27.1054	12.24	33.3247
1246	131.291	10.5955	37.0633
1247	67.363	18.6065	44.786
1248	90.8989	12.8762	47.5118
1249	71.2321	16.1088	31.309
1250	76.7587	14.6687	20.2556
1251	32.6609	17.6296	59.0881
1252	93.6853	17.9745	48.5219
1253	65.3949	20.3522	42.5198
1254	75.9072	17.4177	51.1285
1255	47.0984	22.6902	65.4031
1256	83.3201	16.6704	39.1291
1257	111.59	21.1405	48.4823
1258	86.8207	15.0802	71.838
1259	90.6132	20.3286	36.7198
1260	86.2997	19.3334	43.2039
1261	47.6527	15.2716	41.3484
1262	84.3896	17.1691	75.9842
1263	98.9492	25.7295	40.4445
1264	79.0037	13.2814	34.0082
1265	91.5457	15.3287	66.5187
1266	82.8876	22.5156	34.6054
1267	108.327	21.0379	32.3456
1268	72.0619	16.6357	40.5228
1269	120.107	16.9943	37.8121
1270	72.8067	13.0765	41.9913
1271	59.0067	20.8661	25.87
1272	88.9026	13.807	72.0549
1273	98.4604	23.0535	65.631
1274	113.855	18.6884	34.2468
1275	50.2318	12.0111	54.0954
1276	44.9283	16.502	41.7567
1277	64.1942	16.4369	53.0458
1278	69.8073	17.3426	36.6188
1279	72.3554	14.827	33.9804
1280	78.5004	20.7644	57.2243
1281	76.589	17.3681	24.0977
1282	86.5523	6.83985	30.4474
1283	75.338	22.5438	42.89
1284	63.8835	23.1901	44.3686
1285	110.786	17.0257	44.6595
1286	51.931	13.3419	36.8791
1287	127.299	20.927	45.4505
1288	42.0492	15.3961	42.3769
1289	63.6237	17.9369	41.0554
1290	128.376	12.0959	31.3367
1291	55.9829	12.7474	56.8293
1292	57.6813	9.87975	60.1731
1293	65.6871	16.4906	45.2824
1294	108.485	23.5434	57.2776
1295	100.219	13.4505	37.1972
1296	52.6416	18.5778	43.699
1297	56.3398	15.1562	37.9864
1298	49.8672	16.9392	57.3859
1299	85.7284	9.0394	67.8006
1300	78.9375	10.6465	61.0321
1301	72.2095	12.6687	56.7047
1302	53.3704	20.375	55.99
1303	74.4621	12.6036	41.9443
1304	66.9985	17.5439	44.0621
1305	64.4776	9.54152	56.3733
1306	72.5734	19.7634	70.2798
1307	75.2441	14.0915	39.9096
1308	72.9462	13.9036	29.7805
1309	30.7009	26.2944	64.6981
1310	62.8315	16.9201	63.8489
1311	41.6739	12.3298	38.0693
1312	55.3232	14.6176	80.6583
1313	63.5892	18.3673	39.0126
1314	84.5426	17.2702	55.4931
1315	64.9674	18.788	53.929
1316	99.4313	7.17372	35.8428
1317	67.0434	14.7391	39.9846
1318	65.0465	16.3904	53.5014
1319	92.1617	14.5288	35.7283
1320	64.5202	19.0364	43.4904
1321	86.803	11.863	61.5729
1322	49.9525	13.2233	44.9621
1323	75.8813	11.983	42.5316
1324	81.4844	22.7877	44.5094
1325	88.5398	15.4872	53.3014
1326	66.8868	10.7498	64.4107
1327	93.6691	26.5939	21.7418
1328	78.396	13.2035	46.7527
1329	92.7943	11.7866	52.6387
1330	95.7093	13.5457	45.7616
1331	82.0326	19.8037	39.3483
1332	61.4309	15.1501	39.7474
1333	97.2451	12.0565	49.5269
1334	116.427	14.5039	30.9786
1335	90.5393	13.7411	64.4405
1336	91.087	22.266	44.0837
1337	68.3121	14.1147	45.2734
1338	56.3315	24.1694	36.1331
1339	96.7551	18.8621	46.9312
1340	57.8485	17.9095	46.9203
1341	83.2606	17.3303	36.5286
1342	49.1193	17.9087	42.5405
1343	114.486	11.2448	58.3901
1344	64.4583	20.5686	41.1341
1345	45.7329	17.1236	37.6134
1346	98.0087	19.2423	66.3679
1347	66.4659	11.5186	54.1326
1348	75.8036	13.0133	52.4632
1349	87.9244	9.11011	45.3758
1350	45.6805	21.4793	62.5093
1351	63.2808	16.6282	48.4065
1352	87.6265	15.2569	48.9184
1353	74.2889	11.9386	45.0933
1354	85.155	9.89509	74.7657
1355	93.9352	18.5704	62.4184
1356	42.1086	11.3475	33.9895
1357	81.936	12.7455	51.4597
1358	82.8482	10.5102	61.4661
1359	93.2621	12.7007	49.4023
1360	118.906	12.9962	33.8407
1361	70.2616	13.0127	35.6608
1362	59.3244	20.3792	46.6677
1363	108.14	24.1608	45.3583
1364	101.191	18.1081	38.3992
1365	51.789	14.9862	45.2269
1366	21.8886	25.0049	24.6795
1367	106.194	12.272	53.1883
1368	85.8738	11.6442	51.3673
1369	115.845	15.6306	50.2745
1370	55.3743	22.6643	35.6543
1371	49.5211	13.9354	58.0453
1372	80.8482	14.0081	33.6431
1373	70.095	12.886	44.6182
1374	51.6606	18.2316	51.1229
1375	105.271	23.717	61.5482
1376	78.6224	19.7292	46.4693
1377	96.0049	11.7835	23.9165
1378	50.211	14.5613	43.4897
1379	23.5004	16.4296	39.0522
1380	85.6517	17.4134	36.3795
1381	117.086	9.22045	42.9817
1382	88.3059	11.2425	32.9687
1383	80.9416	9.88364	32.1345
1384	79.9131	14.503	39.5002
1385	70.2743	11.6638	34.8598
1386	99.307	12.6292	37.1709
1387	36.1677	16.8424	37.9386
1388	44.0332	11.7113	29.894
1389	62.0301	17.4645	43.5509
1390	109.896	13.6677	60.034
1391	38.7876	12.2254	33.2657
1392	99.2181	11.4027	56.5268
1393	88.1119	7.3117	60.6197
1394	67.4325	6.096	45.656
1395	42.181	15.3066	37.4655
1396	97.0348	11.6033	51.4541
1397	56.5244	11.6445	44.5383
1398	68.9148	17.5627	32.5402
1399	56.5387	17.58	45.3931
1400	64.9688	17.8357	71.8318
1401	84.0834	14.6486	50.3731
1402	111.566	14.8225	46.0674
1403	89.1249	18.0109	34.3225
1404	89.2729	21.7192	51.7846
1405	54.4855	18.9069	54.2295
1406	99.8382	16.3301	31.1555
1407	90.4331	20.6585	44.0095
1408	61.5345	10.8598	50.7191
1409	82.823	21.7	48.0721
1410	107.155	14.852	31.7376
1411	93.5472	21.203	52.0644
1412	54.6464	8.11194	61.1506
1413	94.6283	15.1396	47.3361
1414	99.0622	18.7409	44.5659
1415	80.1674	17.9806	41.8883
1416	86.7752	17.9265	74.2995
1417	60.6707	18.6134	46.7472
1418	53.6124	20.2202	60.1879
1419	103.088	18.8646	35.4572
1420	22.6804	15.0955	52.8501
1421	89.6925	23.2719	49.7974
1422	69.4476	11.0573	46.099
1423	50.2611	16.6948	55.6513
1424	73.8237	15.8745	45.5229
1425	65.8082	13.332	58.9618
1426	74.5718	11.4712	39.3757
1427	33.7829	8.08322	58.1937
1428	94.0908	21.0744	38.0436
1429	63.2101	15.5823	59.8468
1430	72.4415	6.75703	40.6291
1431	113.634	20.7811	40.1894
1432	73.266	16.2414	59.6222
1433	53.4072	13.6112	62.4725
1434	73.7306	13.1612	37.8141
1435	89.8132	15.4297	27.4326
1436	58.8759	8.96171	53.3523
1437	48.8329	17.6763	29.9288
1438	58.8163	11.8125	57.3857
1439	86.7091	8.07334	55.8215
1440	67.0057	12.1161	42.901
1441	79.8977	16.9577	54.3114
1442	67.2424	21.9807	28.2389
1443	87.7911	18.7193	36.4011
1444	70.7942	6.75147	52.3908
1445	56.317	21.2299	45.3897
1446	68.0012	11.4766	31.2409
1447	99.4104	13.8921	33.3261
1448	54.2079	24.5412	34.9396
1449	86.2712	16.1617	53.5244
1450	80.6859	11.2813	59.0481
1451	41.0218	26.2444	42.8138
1452	83.0603	15.7481	41.6381
1453	73.9288	21.0098	42.6136
1454	76.7464	16.7403	51.5547
1455	45.5866	11.9449	46.0418
1456	88.3354	19.0534	55.8703
1457	52.4791	16.6493	68.234
1458	67.1615	8.98813	33.5909
1459	98.4523	13.0608	57.7565
1460	86.4379	16.3742	27.5086
1461	63.2911	11.9311	48.8378
1462	92.208	18.2813	39.8829
1463	96.0609	18.733	23.815
1464	58.3524	16.8021	59.332
1465	90.3239	19.1753	56.7897
1466	34.9091	6.93793	33.2752
1467	92.8805	11.6669	44.3393
1468	73.9912	26.1843	61.4471
1469	97.0339	19.0086	64.7761
1470	51.1206	23.9057	35.5874
1471	95.8043	13.3528	36.3744
1472	83.3701	23.4334	42.9205
1473	29.0288	12.4246	44.6923
1474	80.2908	13.6364	45.0297
1475	76.3609	11.818	35.5068
1476	74.2136	20.2671	37.8308
1477	84.8987	12.987	54.5747
1478	45.2374	14.2646	51.2337
1479	77.5868	22.1371	43.5453
1480	66.0121	13.7756	40.6065
1481	71.7148	17.6167	38.7585
1482	69.9516	17.6796	48.347
1483	61.1062	12.7665	52.0667
1484	61.334	24.0994	24.7128
1485	64.3844	19.3754	43.9463
1486	41.1985	11.3343	52.1051
1487	92.2742	19.944	44.6817
1488	72.4932	19.3784	29.3729
1489	67.5901	20.1021	43.8744
1490	70.5768	17.1325	38.157
1491	55.5321	13.064	55.8774
1492	119.147	15.0651	45.9762
1493	82.1099	11.466	54.9065
1494	111.58	11.2682	38.4736
1495	36.3626	24.237	72.2205
1496	73.7979	13.8502	24.0335
1497	52.8528	9.69314	42.7442
1498	95.1347	11.2313	27.5212
1499	33.1845	17.0768	61.9574
1500	89.6522	11.1273	47.6674
1501	68.0303	17.3782	52.7471
1502	78.4987	13.8389	60.5205
1503	41.6295	15.536	29.9161
1504	88.6037	16.3982	56.8075
1505	98.8918	13.8957	45.5251
1506	49.8907	22.1671	45.5048
1507	77.5989	16.8728	45.5355
1508	56.3484	13.4991	53.9294
1509	56.6504	17.409	39.9418
1510	62.8347	13.0524	44.601
1511	57.8377	17.7172	59.0373
1512	29.2834	19.3826	46.3025
1513	54.4387	19.3868	44.8391
1514	92.854	16.9218	55.8897
1515	106.697	9.37427	67.0101
1516	74.9525	16.8428	53.2585
1517	60.431	25.9015	39.7234
1518	96.4183	17.362	71.6801
1519	60.4316	10.4329	40.5744
1520	91.5403	17.0095	25.3077
1521	49.3482	23.1888	47.6983
1522	62.5995	11.7504	38.9864
1523	66.7982	18.0368	51.0595
1524	58.6629	14.8352	55.395
1525	19.3844	17.4936	39.4929
1526	64.0468	13.0665	38.8107
1527	65.1866	17.5665	60.1572
1528	25.8925	17.5997	41.2964
1529	65.4972	13.5129	54.5373
1530	53.1913	16.6529	50.1913
1531	47.2956	15.0234	33.0026
1532	62.106	15.9061	38.5372
1533	101.694	17.005	62.901
1534	62.8225	9.53978	33.235
1535	69.4732	21.8485	37.496
1536	59.8578	16.5006	22.1551
1537	79.9832	11.466	55.3282
1538	94.0804	6.44689	52.8153
1539	57.8587	15.1389	44.024
1540	99.9195	19.6756	57.2439
1541	63.1002	13.619	41.2196
1542	117.053	6.2693	36.3983
1543	52.2928	14.2921	39.2092
1544	56.502	22.6894	55.155
1545	57.2452	8.60215	46.4618
1546	41.5366	16.2778	56.4897
1547	64.1157	15.6675	54.3851
1548	108.906	22.1714	34.28
1549	109.905	12.8794	47.849
1550	79.4575	16.9325	41.561
1551	69.0895	26.6884	56.4071
1552	28.1911	19.4102	23.9564
1553	78.4802	12.7176	47.1652
1554	79.3284	16.6617	38.5248
1555	108.387	15.6174	60.5747
1556	84.8907	17.9112	36.1878
1557	59.7879	14.9883	33.0133
1558	55.4427	15.5202	37.3131
1559	90.0399	15.8878	67.7703
1560	92.7006	10.8614	37.6226
1561	84.0426	13.8719	50.9893
1562	75.5038	13.7326	58.6899
1563	31.6067	17.4852	34.7217
1564	81.5097	20.5174	33.2539
1565	96.0221	15.4756	58.4647
1566	95.6937	18.4357	79.6772
1567	51.9491	17.6088	40.2037
1568	69.7775	16.245	48.1652
1569	81.7312	14.5513	58.1615
1570	64.591	15.748	46.843
1571	84.1249	15.1829	47.5663
1572	75.6178	14.7126	35.2454
1573	31.6603	16.4049	40.2204
1574	113.548	16.1773	47.3221
1575	23.6957	11.414	35.694
1576	43.7511	13.0214	59.1989
1577	89.8704	15.1986	61.5987
1578	23.8627	16.2914	57.1989
1579	105.271	19.5458	61.5184
1580	93.3961	8.47773	42.7085
1581	73.4173	12.4067	43.866
1582	83.7939	16.9801	32.1283
1583	73.4307	16.7423	50.7557
1584	107.985	13.8704	40.3582
1585	42.5552	12.5177	71.4238
1586	25.5952	14.4005	39.7694
1587	52.0094	18.8042	46.5075
1588	47.3196	13.5975	48.533
1589	64.9259	20.0168	53.5361
1590	110.918	17.2882	29.22
1591	32.7103	13.8229	68.7157
1592	92.2783	19.8661	35.0495
1593	53.7287	14.1972	52.9038
1594	100.559	22.1593	51.6037
1595	75.0168	15.2634	43.7328
1596	90.6167	17.8531	62.0476
1597	81.1638	16.9942	62.8754
1598	59.4955	16.7421	40.7534
1599	83.0698	20.7439	65.9831
1600	67.813	19.7667	46.0676
1601	51.7956	17.8558	46.5003
1602	38.6256	19.0911	39.8385
1603	82.406	22.7126	42.6509
1604	116.605	13.8718	66.997
1605	63.3126	12.9812	37.4014
1606	55.7268	11.8844	23.3072
1607	52.4009	9.79017	48.9171
1608	113.236	11.8737	51.12
1609	49.4705	19.4867	47.9504
1610	57.062	18.7474	40.9755
1611	51.3692	10.905	34.5824
1612	105.064	11.447	61.8752
1613	81.9562	12.4845	69.5746
1614	73.3454	11.1203	34.7441
1615	57.465	23.1823	43.3588
1616	118.554	13.9651	33.2788
1617	74.1609	21.3859	28.8524
1618	101.746	19.0616	51.4956
1619	63.5769	14.5253	47.945
1620	82.4052	16.0087	49.5789
1621	87.0854	21.7444	54.8028
1622	57.424	8.7214	50.7295
1623	79.2027	18.1321	30.4674
1624	98.4925	16.3737	53.3684
1625	53.5272	20.4194	24.6553
1626	69.7777	7.76587	50.4382
1627	92.5397	19.1418	37.0168
1628	97.237	12.1062	50.8686
1629	72.5154	15.0365	44.4944
1630	61.9124	20.0973	58.2132
1631	53.0951	15.1622	47.5493
1632	69.8048	14.8525	62.2358
1633	90.7709	9.88887	48.4968
1634	63.0651	12.0541	34.1278
1635	88.251	10.9728	67.5326
1636	70.6235	13.9873	68.936
1637	97.9198	21.1564	62.6866
1638	99.3188	20.6397	36.5269
1639	92.0307	19.5044	40.731
1640	70.3978	14.4789	36.6358
1641	93.0846	9.09942	44.1816
1642	82.6343	22.9283	42.5399
1643	88.4245	12.25	62.7315
1644	84.9616	11.3104	27.3136
1645	76.573	18.6842	44.0221
1646	67.5098	13.8658	31.5026
1647	74.5346	21.0289	57.4287
1648	47.5201	12.0258	56.2094
1649	63.4296	18.4981	20.3028
1650	86.6823	9.50844	58.99
1651	83.2955	18.1153	44.6662
1652	54.6185	17.6481	27.7958
1653	86.9536	16.9463	59.3054
1654	65.4204	12.3105	28.7588
1655	122.35	22.1641	35.9683
1656	78.5767	14.51	55.6547
1657	67.4952	17.3029	45.1459
1658	61.335	8.60608	44.8777
1659	102.139	16.3635	55.1427
1660	116.264	15.9407	45.2701
1661	87.965	11.4247	55.3659
1662	71.3504	13.1233	65.3614
1663	75.9322	11.2474	46.2905
1664	80.8652	18.1175	40.5163
1665	74.6615	14.8805	73.5234
1666	86.6915	18.0774	58.9432
1667	44.2274	14.8223	57.4252
1668	36.6486	7.91485	42.9662
1669	88.763	8.99036	56.9714
1670	84.7295	8.52607	54.061
1671	62.368	20.3726	30.1163
1672	78.1025	14.0521	39.8351
1673	56.8297	22.3858	37.8245
1674	62.6348	15.4195	44.0681
1675	56.1714	10.0054	32.4244
1676	91.5546	16.2403	27.2714
1677	88.4796	18.2176	46.3995
1678	63.3299	17.4939	23.3626
1679	95.9755	19.1881	34.839
1680	55.3419	14.69	61.7388
1681	73.8678	10.1422	27.0605
1682	60.6228	21.0006	57.397
1683	84.4139	8.87584	47.6779
1684	97.7039	20.5041	47.7416
1685	50.2567	11.8114	54.4908
1686	63.6401	15.5667	42.9286
1687	89.8168	19.6475	57.293
1688	63.6165	12.8191	49.6294
1689	90.9743	15.7359	59.2825
1690	83.1436	12.3543	49.0935
1691	76.7742	21.2096	78.6464
1692	69.6156	24.9916	35.7572
1693	93.0349	9.34686	65.5133
1694	91.2588	16.5333	38.1028
1695	68.7891	19.1245	52.2021
1696	103.929	15.1728	53.1419
1697	103.504	13.1143	48.5599
1698	98.5167	10.919	57.77
1699	66.9672	12.861	54.6889
1700	90.8564	13.7265	41.7275
1701	37.0004	17.7306	56.9944
1702	83.9951	19.6733	39.6251
1703	76.7025	6.70541	44.3378
1704	90.7942	10.0328	45.6116
1705	39.9643	10.5927	51.7471
1706	51.3038	17.5405	41.0479
1707	94.2612	15.3652	24.5985
1708	48.1691	16.2814	40.9232
1709	97.3546	10.5396	42.2859
1710	72.1162	19.8608	36.872
1711	76.0382	21.8118	57.9635
1712	71.2313	24.1326	41.9787
1713	85.8966	14.841	49.1767
1714	46.1503	17.8711	34.3161
1715	97.6432	13.5658	40.3091
1716	87.5903	23.2649	52.2318
1717	75.0135	11.2962	48.3078
1718	66.3972	8.58111	36.5508
1719	112.644	8.39607	57.4214
1720	86.6184	26.0299	42.2967
1721	120.555	13.0132	50.9918
1722	77.7145	19.3095	53.6855
1723	97.493	15.0166	31.1778
1724	69.419	12.2714	40.6756
1725	95.344	13.5549	43.0338
1726	78.29	22.4025	47.9307
1727	70.1562	13.7224	38.1163
1728	59.6299	17.1764	33.9769
1729	33.6325	15.8614	39.2606
1730	62.1622	15.3265	49.2664
1731	31.1769	12.2317	45.3914
1732	78.5942	13.071	75.0132
1733	91.1867	8.58946	62.3361
1734	62.8204	13.728	29.8305
1735	55.2905	18.012	53.4143
1736	74.9663	8.30054	53.1277
1737	55.3468	17.3663	43.5543
1738	94.328	16.7555	51.1782
1739	34.9427	9.41702	52.3838
1740	121.411	14.4907	42.6583
1741	104.042	13.1835	60.6761
1742	94.5341	23.9858	36.5829
1743	62.5874	14.5081	25.7925
1744	106.276	16.0427	54.6489
1745	46.2718	14.1658	44.8332
1746	74.4718	15.9746	40.8548
1747	57.6295	15.7761	56.2368
1748	29.7617	18.6401	45.4531
1749	88.2211	21.6721	36.8837
1750	127.932	18.6685	49.6469
1751	57.7756	16.1726	41.2987
1752	62.3614	25.4323	31.3121
1753	46.2196	17.6955	31.6768
1754	81.796	21.6304	32.3987
1755	77.325	8.98353	42.1086
1756	98.5008	9.68607	42.1626
1757	55.4114	14.2011	52.5525
1758	66.7854	18.3457	41.5721
1759	75.81	21.0785	45.9077
1760	75.4984	17.3043	55.3985
1761	71.4016	18.2484	30.5058
1762	99.2641	11.889	54.3534
1763	69.5679	15.9995	41.9886
1764	58.3289	14.1281	56.5815
1765	72.7727	8.73389	46.676
1766	97.9727	9.2705	42.3929
1767	82.8317	14.5888	53.2086
1768	96.4837	10.4465	48.8963
1769	89.8551	10.5346	41.2781
1770	47.7069	25.1633	44.9111
1771	93.0357	15.7792	47.822
1772	85.4773	12.9414	52.4312
1773	72.5277	16.4949	62.6932
1774	121.173	24.2186	45.7544
1775	83.3655	12.5848	55.2701
1776	66.2428	11.3255	47.4672
1777	96.3529	16.2274	56.2091
1778	68.5988	9.63431	46.7362
1779	44.2765	12.1927	32.3757
1780	80.9446	21.1542	41.7836
1781	61.7052	16.2965	62.3299
1782	50.7595	14.5642	70.4567
1783	85.2857	20.1892	44.0817
1784	106.794	18.3054	53.4436
1785	67.2339	17.9539	52.0725
1786	107.282	17.108	55.9252
1787	56.6162	18.5238	55.9633
1788	72.2096	17.9288	47.0008
1789	43.5522	20.6648	34.8512
1790	78.1027	18.6562	49.951
1791	98.8754	16.618	48.4311
1792	107.257	18.8058	57.6772
1793	67.0524	24.2212	46.7751
1794	55.8501	15.2881	43.6763
1795	67.6932	10.3971	41.8108
1796	54.6778	24.9754	60.1475
1797	98.9407	14.4692	40.6411
1798	63.2947	14.7127	44.6217
1799	67.7579	16.478	43.2696
1800	79.771	18.9351	33.4804
1801	43.7435	18.1502	40.8971
1802	58.1684	16.5399	68.3756
1803	78.5467	15.2054	29.5146
1804	65.2756	8.64171	43.9879
1805	67.0775	24.2812	54.3461
1806	27.2458	18.9977	52.0329
1807	59.7466	17.0717	55.812
1808	59.5873	19.0237	54.0152
1809	90.7122	14.3105	44.7873
1810	97.5315	11.8097	36.0604
1811	54.5363	14.6773	44.7016
1812	120.051	14.7413	37.0083
1813	106.937	11.1552	37.6541
1814	124.412	12.8569	44.2833
1815	92.8434	12.1614	56.5049
1816	59.8197	9.88054	37.6652
1817	70.8297	16.8068	49.3751
1818	71.6511	16.8832	53.9246
1819	80.9168	11.309	44.6782
1820	84.3946	17.001	29.8499
1821	73.3862	15.2501	53.9155
1822	78.4662	14.0519	58.3989
1823	109.945	10.4312	51.763
1824	68.1335	22.1084	48.254
1825	74.335	16.7386	48.2584
1826	58.5931	19.0713	38.326
1827	84.0705	22.2296	68.377
1828	61.9692	19.1737	32.3648
1829	62.708	18.7932	37.2391
1830	86.1195	22.6686	55.6341
1831	82.6231	20.4322	42.0617
1832	65.0256	18.131	57.4871
1833	64.6616	18.7437	51.8697
1834	81.1286	20.9204	50.0107
1835	109.929	14.339	42.2629
1836	57.3707	10.3407	36.0457
1837	60.4159	19.3615	56.7521
1838	58.1549	19.9606	37.8004
1839	75.5116	11.5338	69.8636
1840	52.4321	19.1568	48.3738
1841	89.2401	9.58637	43.1851
1842	95.9582	19.3775	54.7994
1843	63.6442	13.1885	65.6559
1844	39.0714	14.8866	44.0658
1845	73.6548	18.495	49.1719
1846	77.0686	13.6471	54.821
1847	56.8107	17.6957	42.8184
1848	92.304	19.1253	42.2714
1849	75.9917	19.1713	52.1098
1850	64.1882	16.9177	62.5354
1851	78.5733	21.3306	45.7855
1852	119.505	16.6424	53.1703
1853	93.7359	17.1174	62.839
1854	47.1294	18.0131	36.2221
1855	109.617	10.6458	50.2503
1856	79.0886	11.3094	40.001
1857	107.928	17.0339	51.6467
1858	65.3948	10.1715	37.0462
1859	93.7049	14.9123	51.8358
1860	64.5359	6.87517	38.6448
1861	57.8276	21.7787	68.5218
1862	92.4936	17.1146	59.1307
1863	24.1079	10.9916	46.0796
1864	92.2889	18.8825	45.1263
1865	46.5136	16.2976	24.0809
1866	68.2683	13.1769	35.5725
1867	103.998	18.1568	53.1812
1868	51.7876	12.8957	62.6708
1869	72.5024	21.7116	38.7728
1870	78.8449	19.0456	41.9355
1871	61.0707	16.4786	62.0909
1872	33.2761	11.3133	46.1169
1873	84.9146	11.4252	44.6738
1874	88.8802	20.2958	37.9337
1875	46.6932	15.6278	53.15
1876	76.0813	14.9097	63.1142
1877	72.7047	13.7273	33.66
1878	113.658	12.3985	56.8917
1879	89.0209	16.3031	55.3895
1880	64.8598	7.65465	40.6466
1881	54.9083	13.1873	64.9286
1882	81.8726	11.8853	45.3934
1883	46.8473	12.8093	40.0113
1884	84.055	12.2592	59.9511
1885	92.4462	12.8978	42.2103
1886	43.5686	16.8304	67.8699
1887	63.4463	13.0205	31.7728
1888	56.3177	26.1639	20.7092
1889	110.359	12.7831	41.2882
1890	90.1094	14.4695	59.7664
1891	97.2559	13.2357	55.9311
1892	35.6237	15.6171	41.0498
1893	52.3351	19.6799	57.2229
1894	80.8041	15.8457	36.4257
1895	82.0853	14.9823	46.5506
1896	56.7995	18.1994	31.3508
1897	67.5442	13.0047	51.4722
1898	39.9671	9.8237	50.2001
1899	73.3186	10.2351	49.2378
1900	64.9161	20.726	54.8764
1901	82.3037	13.2952	64.5064
1902	36.214	16.92	46.2953
1903	71.0566	13.4421	47.2203
1904	87.0949	23.0427	49.3231
1905	84.663	13.6221	36.5208
1906	33.6197	10.49	38.2337
1907	48.5149	15.0174	46.6606
1908	69.0528	18.4395	44.4472
1909	67.78	14.1836	41.2458
1910	75.9746	15.8796	64.1754
1911	52.1339	17.9434	44.3314
1912	70.1965	9.53906	57.8848
1913	72.1459	16.7744	29.0939
1914	96.8712	8.77086	33.045
1915	79.6571	7.44859	39.3966
1916	74.6488	15.5603	42.7682
1917	76.5452	21.1057	28.3284
1918	45.3656	14.9285	44.673
1919	35.7432	13.3776	48.288
1920	86.6461	15.2454	51.1267
1921	60.5658	14.7723	45.6029
1922	93.7483	10.2927	37.2384
1923	53.4385	22.1696	45.7175
1924	68.1429	22.7163	61.302
1925	40.952	13.0993	52.1443
1926	83.7732	18.3899	48.1604
1927	64.4525	15.5566	41.2622
1928	105.732	23.7487	59.707
1929	88.9072	9.45072	43.4198
1930	33.9453	8.50538	37.5174
1931	54.8844	12.4823	59.7362
1932	80.4534	16.3189	51.7901
1933	58.815	16.6383	52.3889
1934	71.1083	15.525	45.5644
1935	73.6551	19.9408	42.2187
1936	58.0966	12.7008	52.1559
1937	80.6318	24.5475	53.888
1938	72.5934	17.9276	55.0147
1939	81.3536	8.39835	46.6656
1940	27.9197	6.73803	67.7311
1941	105.779	16.6037	36.4265
1942	41.3616	24.9626	49.4582
1943	93.9965	12.0529	51.3487
1944	65.6529	12.3241	39.1026
1945	117.48	13.8556	65.4961
1946	67.7358	22.1315	51.9788
1947	78.59	16.8748	33.6592
1948	96.7589	22.5897	43.7627
1949	74.2919	15.0133	35.143
1950	141.933	12.0444	42.732
1951	77.1065	13.6706	54.1642
1952	62.5424	13.3245	55.9192
1953	78.8757	12.3179	44.7912
1954	105.127	19.2147	41.803
1955	67.8852	13.991	58.0306
1956	60.7385	14.6105	35.9568
1957	48.4789	14.6744	42.852
1958	68.8583	10.4745	46.6591
1959	36.0656	19.5141	38.3122
1960	84.1588	11.2624	53.3534
1961	87.8652	15.3149	37.5242
1962	81.9093	23.5909	37.0515
1963	53.3144	15.3418	51.5278
1964	88.5294	16.7036	41.9083
1965	116.89	13.4755	60.609
1966	88.8056	6.99475	48.6495
1967	35.5685	17.9565	43.468
1968	53.1796	12.9293	36.4832
1969	73.825	12.3801	38.1578
1970	51.6598	12.7454	40.6356
1971	61.8169	13.4542	26.3808
1972	76.0189	10.4814	45.4508
1973	104.131	8.20198	45.8465
1974	45.8722	10.1638	45.5935
1975	66.9435	7.79483	50.8481
1976	35.4907	13.9125	46.6204
1977	67.5138	15.9982	44.871
1978	51.3216	19.2304	62.1054
1979	110.222	12.0006	39.6931
1980	83.5899	8.14931	69.4823
1981	43.6308	12.441	54.0017
1982	121.258	22.235	44.2758
1983	62.8473	8.65041	49.1295
1984	99.4437	18.574	55.6891
1985	83.3517	6.34127	46.1932
1986	58.439	13.3524	44.0508
1987	81.6742	21.3097	42.9516
1988	70.2005	6.07131	55.36
1989	135.184	24.7636	52.6631
1990	47.0299	23.5349	46.9292
1991	118.739	19.465	55.4512
1992	79.9927	9.67999	45.7415
1993	95.8418	13.4203	52.8337
1994	90.148	17.6261	22.795
1995	67.2095	17.4316	50.0941
1996	79.6421	13.0358	34.5766
1997	100.99	19.3131	36.5965
1998	66.9223	15.1461	47.2595
1999	100.346	18.1617	48.9116
[truncated: 8,001 more rows]

## Sheet: Simulation Output Values 1
Sim #	ADD	ADD_carc	CR	HQ
1	1.30806e-09	8.23182e-10	6.85985e-11	8.7204e-05
2	1.73423e-09	1.09137e-09	9.09479e-11	0.000115615
3	2.5811e-09	1.62433e-09	1.3536e-10	0.000172073
4	4.15275e-09	2.61339e-09	2.17782e-10	0.00027685
5	3.34528e-09	2.10524e-09	1.75436e-10	0.000223019
6	1.90577e-09	1.19933e-09	9.99443e-11	0.000127052
7	2.20349e-09	1.38669e-09	1.15558e-10	0.000146899
8	4.56614e-09	2.87354e-09	2.39461e-10	0.000304409
9	2.22546e-09	1.40052e-09	1.1671e-10	0.000148364
10	3.22841e-09	2.03169e-09	1.69307e-10	0.000215228
11	9.76569e-10	6.1457e-10	5.12141e-11	6.51046e-05
12	3.26594e-09	2.0553e-09	1.71275e-10	0.000217729
13	2.0634e-09	1.29853e-09	1.08211e-10	0.00013756
14	1.53182e-09	9.63999e-10	8.03333e-11	0.000102122
15	1.92532e-09	1.21163e-09	1.00969e-10	0.000128355
16	3.81838e-09	2.40296e-09	2.00247e-10	0.000254558
17	1.47664e-09	9.29273e-10	7.74394e-11	9.84428e-05
18	1.25234e-09	7.88119e-10	6.56766e-11	8.34896e-05
19	2.76753e-09	1.74165e-09	1.45137e-10	0.000184502
20	5.36308e-09	3.37506e-09	2.81255e-10	0.000357538
21	3.61485e-09	2.27488e-09	1.89573e-10	0.00024099
22	3.1512e-09	1.9831e-09	1.65258e-10	0.00021008
23	5.39544e-09	3.39543e-09	2.82953e-10	0.000359696
24	3.97122e-09	2.49915e-09	2.08263e-10	0.000264748
25	2.90839e-09	1.83029e-09	1.52524e-10	0.000193892
26	1.87287e-09	1.17863e-09	9.82189e-11	0.000124858
27	3.8423e-09	2.41802e-09	2.01502e-10	0.000256153
28	1.38952e-09	8.74445e-10	7.28704e-11	9.26346e-05
29	1.47442e-09	9.27878e-10	7.73231e-11	9.8295e-05
30	1.58373e-09	9.96665e-10	8.30554e-11	0.000105582
31	2.54508e-09	1.60166e-09	1.33471e-10	0.000169672
32	2.90448e-09	1.82783e-09	1.52319e-10	0.000193632
33	3.38416e-09	2.12971e-09	1.77475e-10	0.000225611
34	2.95182e-09	1.85763e-09	1.54802e-10	0.000196788
35	2.76952e-09	1.7429e-09	1.45242e-10	0.000184635
36	5.74433e-09	3.61499e-09	3.0125e-10	0.000382955
37	1.64302e-09	1.03398e-09	8.6165e-11	0.000109535
38	8.66624e-09	5.4538e-09	4.54483e-10	0.000577749
39	5.15899e-09	3.24663e-09	2.70553e-10	0.000343933
40	1.55497e-09	9.78567e-10	8.15472e-11	0.000103665
41	6.7593e-09	4.25373e-09	3.54477e-10	0.00045062
42	3.21061e-09	2.02049e-09	1.68374e-10	0.000214041
43	3.74464e-09	2.35656e-09	1.9638e-10	0.000249642
44	1.06734e-09	6.71694e-10	5.59745e-11	7.1156e-05
45	3.39589e-09	2.13709e-09	1.7809e-10	0.000226393
46	1.76743e-09	1.11227e-09	9.26894e-11	0.000117829
47	5.51823e-09	3.4727e-09	2.89392e-10	0.000367882
48	1.5422e-09	9.7053e-10	8.08775e-11	0.000102813
49	6.03143e-09	3.79567e-09	3.16306e-10	0.000402095
50	1.47713e-09	9.29579e-10	7.74649e-11	9.84752e-05
51	3.48171e-09	2.19109e-09	1.82591e-10	0.000232114
52	3.86313e-09	2.43113e-09	2.02594e-10	0.000257542
53	3.41166e-09	2.14701e-09	1.78918e-10	0.000227444
54	1.46285e-09	9.20591e-10	7.67159e-11	9.75231e-05
55	1.01561e-09	6.39139e-10	5.32616e-11	6.77074e-05
56	2.43121e-09	1.52999e-09	1.275e-10	0.00016208
57	2.45751e-09	1.54655e-09	1.28879e-10	0.000163834
58	2.0105e-09	1.26524e-09	1.05437e-10	0.000134034
59	1.61e-09	1.0132e-09	8.4433e-11	0.000107333
60	7.99837e-09	5.03349e-09	4.19458e-10	0.000533224
61	2.75958e-09	1.73664e-09	1.4472e-10	0.000183972
62	4.21489e-09	2.65249e-09	2.21041e-10	0.000280993
63	1.19581e-09	7.52538e-10	6.27115e-11	7.97204e-05
64	2.01509e-09	1.26813e-09	1.05677e-10	0.000134339
65	3.13836e-09	1.97501e-09	1.64585e-10	0.000209224
66	1.5429e-09	9.70968e-10	8.0914e-11	0.00010286
67	2.9922e-09	1.88304e-09	1.5692e-10	0.00019948
68	2.99199e-09	1.8829e-09	1.56909e-10	0.000199466
69	2.13543e-09	1.34386e-09	1.11988e-10	0.000142362
70	3.37378e-09	2.12317e-09	1.76931e-10	0.000224919
71	2.22705e-09	1.40152e-09	1.16793e-10	0.00014847
72	4.31344e-09	2.71451e-09	2.26209e-10	0.000287563
73	1.15996e-09	7.29983e-10	6.08319e-11	7.73309e-05
74	2.87999e-09	1.81242e-09	1.51035e-10	0.000191999
75	1.37867e-09	8.67616e-10	7.23013e-11	9.19111e-05
76	4.08656e-09	2.57173e-09	2.14311e-10	0.000272437
77	2.60979e-09	1.64238e-09	1.36865e-10	0.000173986
78	3.11843e-09	1.96248e-09	1.6354e-10	0.000207896
79	1.28036e-09	8.05749e-10	6.71458e-11	8.53573e-05
80	4.15205e-09	2.61295e-09	2.17746e-10	0.000276803
81	2.40781e-09	1.51527e-09	1.26272e-10	0.00016052
82	2.2542e-09	1.4186e-09	1.18217e-10	0.00015028
83	2.70617e-09	1.70304e-09	1.4192e-10	0.000180411
84	1.32992e-09	8.36939e-10	6.97449e-11	8.86614e-05
85	5.01309e-09	3.15481e-09	2.62901e-10	0.000334206
86	2.39711e-09	1.50853e-09	1.25711e-10	0.000159807
87	2.82448e-09	1.77749e-09	1.48124e-10	0.000188299
88	3.99515e-09	2.51421e-09	2.09518e-10	0.000266344
89	3.43202e-09	2.15982e-09	1.79985e-10	0.000228801
90	2.47826e-09	1.55961e-09	1.29967e-10	0.000165217
91	3.51501e-09	2.21205e-09	1.84337e-10	0.000234334
92	4.1246e-09	2.59567e-09	2.16306e-10	0.000274973
93	3.58287e-09	2.25475e-09	1.87896e-10	0.000238858
94	3.07263e-09	1.93365e-09	1.61138e-10	0.000204842
95	1.65029e-09	1.03855e-09	8.65461e-11	0.000110019
96	1.16537e-09	7.33382e-10	6.11152e-11	7.7691e-05
97	3.77095e-09	2.37312e-09	1.9776e-10	0.000251397
98	4.46126e-09	2.80754e-09	2.33961e-10	0.000297417
99	3.4817e-09	2.19109e-09	1.8259e-10	0.000232113
100	9.31024e-10	5.85907e-10	4.88256e-11	6.20683e-05
101	2.30769e-09	1.45226e-09	1.21022e-10	0.000153846
102	3.1016e-09	1.95188e-09	1.62657e-10	0.000206773
103	3.24044e-09	2.03926e-09	1.69938e-10	0.00021603
104	3.06583e-09	1.92938e-09	1.60781e-10	0.000204389
105	1.34215e-09	8.44635e-10	7.03863e-11	8.94767e-05
106	7.02031e-09	4.41799e-09	3.68166e-10	0.000468021
107	9.93467e-10	6.25204e-10	5.21003e-11	6.62311e-05
108	3.84611e-09	2.42042e-09	2.01701e-10	0.000256407
109	1.40041e-09	8.813e-10	7.34416e-11	9.33607e-05
110	6.86486e-09	4.32016e-09	3.60013e-10	0.000457657
111	2.17341e-09	1.36776e-09	1.1398e-10	0.000144894
112	1.77155e-09	1.11486e-09	9.29051e-11	0.000118103
113	3.79698e-09	2.3895e-09	1.99125e-10	0.000253132
114	3.10045e-09	1.95116e-09	1.62597e-10	0.000206697
115	1.50235e-09	9.45452e-10	7.87877e-11	0.000100157
116	1.41221e-09	8.88727e-10	7.40606e-11	9.41476e-05
117	2.01692e-09	1.26928e-09	1.05773e-10	0.000134461
118	3.40721e-09	2.14421e-09	1.78684e-10	0.000227147
119	1.58115e-09	9.95042e-10	8.29201e-11	0.00010541
120	3.81947e-09	2.40365e-09	2.00304e-10	0.000254631
121	1.27598e-09	8.02992e-10	6.6916e-11	8.50652e-05
122	2.18104e-09	1.37256e-09	1.1438e-10	0.000145402
123	1.08489e-09	6.8274e-10	5.6895e-11	7.23263e-05
124	2.83415e-09	1.78357e-09	1.48631e-10	0.000188943
125	3.73155e-09	2.34832e-09	1.95693e-10	0.00024877
126	1.33315e-09	8.38969e-10	6.99141e-11	8.88764e-05
127	5.52682e-09	3.47811e-09	2.89843e-10	0.000368455
128	8.83728e-10	5.56143e-10	4.63453e-11	5.89152e-05
129	2.52711e-09	1.59035e-09	1.32529e-10	0.000168474
130	4.77899e-09	3.00749e-09	2.50624e-10	0.0003186
131	4.30535e-09	2.70942e-09	2.25785e-10	0.000287023
132	2.08667e-09	1.31317e-09	1.09431e-10	0.000139111
133	3.05689e-09	1.92375e-09	1.60312e-10	0.000203793
134	1.05984e-09	6.66973e-10	5.55811e-11	7.06559e-05
135	3.00794e-09	1.89294e-09	1.57745e-10	0.000200529
136	4.75724e-09	2.9938e-09	2.49484e-10	0.000317149
137	2.34344e-09	1.47476e-09	1.22897e-10	0.000156229
138	5.99419e-09	3.77224e-09	3.14353e-10	0.000399613
139	1.96407e-09	1.23602e-09	1.03002e-10	0.000130938
140	8.0649e-10	5.07536e-10	4.22947e-11	5.3766e-05
141	1.04564e-09	6.5804e-10	5.48367e-11	6.97096e-05
142	3.21836e-09	2.02536e-09	1.6878e-10	0.000214557
143	3.42825e-09	2.15745e-09	1.79788e-10	0.00022855
144	4.2772e-09	2.69171e-09	2.24309e-10	0.000285147
145	3.72526e-09	2.34436e-09	1.95363e-10	0.000248351
146	4.20061e-09	2.6435e-09	2.20292e-10	0.00028004
147	2.5658e-09	1.6147e-09	1.34558e-10	0.000171053
148	1.93181e-09	1.21572e-09	1.0131e-10	0.000128787
149	2.66562e-09	1.67751e-09	1.39793e-10	0.000177708
150	1.33196e-09	8.38224e-10	6.9852e-11	8.87975e-05
151	3.59762e-09	2.26404e-09	1.8867e-10	0.000239841
152	2.08917e-09	1.31474e-09	1.09562e-10	0.000139278
153	3.31345e-09	2.0852e-09	1.73767e-10	0.000220897
154	1.58366e-09	9.96619e-10	8.30515e-11	0.000105577
155	1.34332e-09	8.45369e-10	7.04474e-11	8.95544e-05
156	2.74636e-09	1.72833e-09	1.44027e-10	0.000183091
157	3.06801e-09	1.93074e-09	1.60895e-10	0.000204534
158	7.78222e-09	4.89747e-09	4.08123e-10	0.000518815
159	4.55128e-09	2.86419e-09	2.38682e-10	0.000303419
160	5.42094e-09	3.41148e-09	2.8429e-10	0.000361396
161	1.51223e-09	9.51666e-10	7.93055e-11	0.000100815
162	8.13283e-10	5.11811e-10	4.26509e-11	5.42189e-05
163	3.50652e-09	2.20671e-09	1.83892e-10	0.000233768
164	3.7997e-09	2.39121e-09	1.99267e-10	0.000253313
165	1.14242e-09	7.18944e-10	5.9912e-11	7.61616e-05
166	1.30545e-09	8.21539e-10	6.84616e-11	8.70299e-05
167	2.87004e-09	1.80616e-09	1.50513e-10	0.000191336
168	2.29275e-09	1.44286e-09	1.20238e-10	0.00015285
169	1.01084e-09	6.36139e-10	5.30116e-11	6.73896e-05
170	2.40081e-09	1.51086e-09	1.25905e-10	0.000160054
171	6.7837e-09	4.26908e-09	3.55757e-10	0.000452247
172	3.04561e-09	1.91665e-09	1.59721e-10	0.00020304
173	2.89379e-09	1.82111e-09	1.51759e-10	0.000192919
174	3.98176e-09	2.50578e-09	2.08815e-10	0.000265451
175	1.55096e-09	9.76042e-10	8.13369e-11	0.000103397
176	2.76618e-09	1.7408e-09	1.45067e-10	0.000184412
177	2.90964e-09	1.83108e-09	1.5259e-10	0.000193976
178	2.21735e-09	1.39541e-09	1.16284e-10	0.000147824
179	2.30819e-09	1.45258e-09	1.21048e-10	0.00015388
180	4.19888e-09	2.64242e-09	2.20201e-10	0.000279925
181	2.87832e-09	1.81137e-09	1.50948e-10	0.000191888
182	2.34804e-09	1.47766e-09	1.23138e-10	0.000156536
183	3.37177e-09	2.12191e-09	1.76826e-10	0.000224785
184	1.05889e-09	6.66376e-10	5.55313e-11	7.05927e-05
185	1.45711e-09	9.16981e-10	7.64151e-11	9.71406e-05
186	6.93217e-10	4.36252e-10	3.63543e-11	4.62144e-05
187	3.38073e-09	2.12754e-09	1.77295e-10	0.000225382
188	1.28589e-08	8.09228e-09	6.74357e-10	0.000857258
189	2.47411e-09	1.557e-09	1.2975e-10	0.000164941
190	1.13752e-09	7.15858e-10	5.96548e-11	7.58346e-05
191	1.05666e-09	6.64971e-10	5.54143e-11	7.04439e-05
192	2.76531e-09	1.74025e-09	1.45021e-10	0.000184354
193	3.06606e-09	1.92952e-09	1.60793e-10	0.000204404
194	1.5993e-09	1.00647e-09	8.38721e-11	0.00010662
195	4.64488e-09	2.92309e-09	2.43591e-10	0.000309658
196	2.89931e-09	1.82458e-09	1.52048e-10	0.000193287
197	3.82952e-09	2.40998e-09	2.00831e-10	0.000255302
198	1.46177e-09	9.19912e-10	7.66593e-11	9.74512e-05
199	1.43163e-09	9.00949e-10	7.5079e-11	9.54422e-05
200	1.82662e-09	1.14952e-09	9.57934e-11	0.000121775
201	3.5163e-09	2.21286e-09	1.84405e-10	0.00023442
202	3.24916e-09	2.04475e-09	1.70396e-10	0.000216611
203	3.10669e-09	1.95509e-09	1.62924e-10	0.000207113
204	2.15306e-09	1.35496e-09	1.12913e-10	0.000143538
205	2.94458e-09	1.85307e-09	1.54423e-10	0.000196306
206	2.65774e-09	1.67256e-09	1.3938e-10	0.000177183
207	1.78849e-09	1.12553e-09	9.37938e-11	0.000119233
208	3.13083e-09	1.97028e-09	1.6419e-10	0.000208722
209	8.82491e-10	5.55365e-10	4.62804e-11	5.88327e-05
210	4.06824e-09	2.56021e-09	2.13351e-10	0.000271216
211	2.16109e-09	1.36e-09	1.13334e-10	0.000144072
212	3.19978e-09	2.01367e-09	1.67806e-10	0.000213319
213	1.99024e-09	1.25249e-09	1.04374e-10	0.000132683
214	7.84294e-09	4.93568e-09	4.11307e-10	0.000522863
215	1.71428e-09	1.07882e-09	8.99018e-11	0.000114285
216	3.31962e-09	2.08908e-09	1.7409e-10	0.000221308
217	2.29345e-09	1.4433e-09	1.20275e-10	0.000152897
218	3.52916e-09	2.22095e-09	1.8508e-10	0.000235277
219	2.88132e-09	1.81326e-09	1.51105e-10	0.000192088
220	1.67734e-09	1.05557e-09	8.79645e-11	0.000111823
221	2.03659e-09	1.28166e-09	1.06805e-10	0.000135773
222	2.75898e-09	1.73627e-09	1.44689e-10	0.000183932
223	3.93655e-09	2.47733e-09	2.06444e-10	0.000262437
224	1.99165e-09	1.25338e-09	1.04448e-10	0.000132777
225	1.69316e-09	1.06553e-09	8.87941e-11	0.000112877
226	1.5368e-09	9.67134e-10	8.05945e-11	0.000102454
227	3.17951e-09	2.00091e-09	1.66743e-10	0.000211967
228	2.62666e-09	1.653e-09	1.3775e-10	0.000175111
229	3.29267e-09	2.07212e-09	1.72677e-10	0.000219511
230	2.32247e-09	1.46157e-09	1.21797e-10	0.000154831
231	4.73313e-09	2.97863e-09	2.48219e-10	0.000315542
232	4.05249e-09	2.55029e-09	2.12524e-10	0.000270166
233	3.20779e-09	2.01871e-09	1.68226e-10	0.000213853
234	3.35595e-09	2.11195e-09	1.75996e-10	0.00022373
235	2.01819e-09	1.27008e-09	1.0584e-10	0.000134546
236	2.5581e-09	1.60985e-09	1.34154e-10	0.00017054
237	1.76553e-09	1.11108e-09	9.25896e-11	0.000117702
238	2.87552e-09	1.80961e-09	1.50801e-10	0.000191702
239	3.51468e-09	2.21184e-09	1.8432e-10	0.000234312
240	2.27723e-09	1.43309e-09	1.19424e-10	0.000151815
241	4.37245e-09	2.75165e-09	2.29304e-10	0.000291497
242	7.19963e-09	4.53084e-09	3.7757e-10	0.000479975
243	1.26957e-09	7.98958e-10	6.65798e-11	8.46378e-05
244	2.83607e-09	1.78478e-09	1.48732e-10	0.000189071
245	3.64751e-09	2.29544e-09	1.91286e-10	0.000243168
246	1.1749e-09	7.39385e-10	6.16154e-11	7.83269e-05
247	4.71948e-09	2.97004e-09	2.47503e-10	0.000314632
248	2.08912e-09	1.31472e-09	1.0956e-10	0.000139275
249	2.8621e-09	1.80116e-09	1.50097e-10	0.000190807
250	1.2603e-09	7.93124e-10	6.60937e-11	8.40198e-05
251	1.88468e-09	1.18606e-09	9.8838e-11	0.000125645
252	3.16092e-09	1.98922e-09	1.65768e-10	0.000210728
253	6.93401e-09	4.36368e-09	3.6364e-10	0.000462267
254	1.7844e-09	1.12295e-09	9.35793e-11	0.00011896
255	1.50212e-09	9.45306e-10	7.87755e-11	0.000100141
256	1.82719e-09	1.14988e-09	9.58232e-11	0.000121813
257	1.83286e-09	1.15345e-09	9.61205e-11	0.000122191
258	1.9166e-09	1.20615e-09	1.00512e-10	0.000127774
259	1.79457e-09	1.12935e-09	9.41127e-11	0.000119638
260	2.23043e-09	1.40364e-09	1.1697e-10	0.000148695
261	1.54506e-09	9.72332e-10	8.10276e-11	0.000103004
262	5.69768e-09	3.58564e-09	2.98803e-10	0.000379845
263	2.02757e-09	1.27598e-09	1.06332e-10	0.000135171
264	4.04222e-09	2.54383e-09	2.11986e-10	0.000269481
265	3.20322e-09	2.01584e-09	1.67986e-10	0.000213548
266	4.54015e-09	2.85719e-09	2.38099e-10	0.000302677
267	2.32019e-09	1.46013e-09	1.21678e-10	0.00015468
268	4.11587e-09	2.59018e-09	2.15848e-10	0.000274391
269	5.3556e-09	3.37036e-09	2.80863e-10	0.00035704
270	2.61836e-09	1.64777e-09	1.37314e-10	0.000174557
271	3.29768e-09	2.07528e-09	1.7294e-10	0.000219845
272	2.45276e-09	1.54356e-09	1.2863e-10	0.000163517
273	1.57434e-09	9.90756e-10	8.2563e-11	0.000104956
274	1.02042e-09	6.42163e-10	5.35136e-11	6.80277e-05
275	3.79259e-09	2.38674e-09	1.98895e-10	0.00025284
276	2.92689e-09	1.84194e-09	1.53495e-10	0.000195126
277	1.73273e-09	1.09043e-09	9.08695e-11	0.000115515
278	1.47714e-09	9.29585e-10	7.74654e-11	9.84758e-05
279	3.17399e-09	1.99744e-09	1.66453e-10	0.000211599
280	3.8701e-09	2.43551e-09	2.02959e-10	0.000258007
281	1.91713e-09	1.20648e-09	1.0054e-10	0.000127809
282	2.73068e-09	1.71846e-09	1.43205e-10	0.000182045
283	1.88611e-09	1.18695e-09	9.89129e-11	0.00012574
284	1.11524e-08	7.01836e-09	5.84863e-10	0.000743492
285	1.92504e-09	1.21146e-09	1.00955e-10	0.000128336
286	4.41381e-09	2.77768e-09	2.31473e-10	0.000294254
287	2.34818e-09	1.47775e-09	1.23146e-10	0.000156545
288	4.36211e-09	2.74514e-09	2.28762e-10	0.000290807
289	2.18441e-09	1.37468e-09	1.14557e-10	0.000145627
290	1.89428e-09	1.1921e-09	9.93414e-11	0.000126285
291	2.49226e-09	1.56842e-09	1.30702e-10	0.000166151
292	2.55694e-09	1.60912e-09	1.34093e-10	0.000170462
293	3.67319e-09	2.31159e-09	1.92633e-10	0.000244879
294	1.97962e-09	1.2458e-09	1.03817e-10	0.000131974
295	5.09051e-09	3.20354e-09	2.66961e-10	0.000339368
296	2.86416e-09	1.80246e-09	1.50205e-10	0.000190944
297	6.93546e-09	4.36459e-09	3.63716e-10	0.000462364
298	3.57123e-09	2.24743e-09	1.87285e-10	0.000238082
299	2.44576e-09	1.53915e-09	1.28263e-10	0.00016305
300	1.95201e-09	1.22843e-09	1.02369e-10	0.000130134
301	2.00412e-09	1.26122e-09	1.05102e-10	0.000133608
302	1.84734e-09	1.16256e-09	9.68799e-11	0.000123156
303	1.08362e-09	6.8194e-10	5.68283e-11	7.22415e-05
304	3.93396e-09	2.4757e-09	2.06308e-10	0.000262264
305	3.55904e-09	2.23976e-09	1.86647e-10	0.000237269
306	3.24182e-09	2.04013e-09	1.70011e-10	0.000216122
307	3.37721e-09	2.12533e-09	1.77111e-10	0.000225147
308	6.28118e-09	3.95284e-09	3.29403e-10	0.000418745
309	2.67348e-09	1.68246e-09	1.40205e-10	0.000178232
310	4.47418e-09	2.81567e-09	2.34639e-10	0.000298279
311	2.74398e-09	1.72683e-09	1.43902e-10	0.000182932
312	4.58706e-09	2.8867e-09	2.40559e-10	0.000305804
313	2.79419e-09	1.75843e-09	1.46536e-10	0.00018628
314	3.39111e-09	2.13408e-09	1.7784e-10	0.000226074
315	2.43206e-09	1.53053e-09	1.27544e-10	0.000162137
316	5.04726e-09	3.17632e-09	2.64693e-10	0.000336484
317	1.71313e-09	1.0781e-09	8.98415e-11	0.000114209
318	1.65578e-09	1.04201e-09	8.68341e-11	0.000110386
319	2.85975e-09	1.79968e-09	1.49974e-10	0.00019065
320	6.23905e-10	3.92633e-10	3.27194e-11	4.15936e-05
321	2.55217e-09	1.60612e-09	1.33843e-10	0.000170145
322	4.15357e-09	2.6139e-09	2.17825e-10	0.000276905
323	3.1349e-09	1.97284e-09	1.64403e-10	0.000208993
324	3.67287e-09	2.31139e-09	1.92616e-10	0.000244858
325	2.52247e-09	1.58743e-09	1.32286e-10	0.000168164
326	2.99752e-09	1.88639e-09	1.57199e-10	0.000199835
327	2.60272e-09	1.63793e-09	1.36494e-10	0.000173515
328	2.38103e-09	1.49842e-09	1.24868e-10	0.000158736
329	4.50985e-09	2.83812e-09	2.3651e-10	0.000300657
330	6.46838e-09	4.07065e-09	3.39221e-10	0.000431225
331	1.841e-09	1.15857e-09	9.65476e-11	0.000122734
332	6.56197e-09	4.12955e-09	3.44129e-10	0.000437465
333	2.8205e-09	1.77498e-09	1.47915e-10	0.000188033
334	6.8733e-10	4.32547e-10	3.60456e-11	4.5822e-05
335	3.45495e-09	2.17425e-09	1.81188e-10	0.00023033
336	2.24481e-09	1.41269e-09	1.17724e-10	0.000149654
337	1.58058e-09	9.94685e-10	8.28904e-11	0.000105372
338	2.59264e-09	1.63158e-09	1.35965e-10	0.000172842
339	2.78868e-09	1.75496e-09	1.46247e-10	0.000185912
340	2.34478e-09	1.4756e-09	1.22967e-10	0.000156318
341	2.21291e-09	1.39262e-09	1.16051e-10	0.000147527
342	2.47582e-09	1.55807e-09	1.29839e-10	0.000165054
343	3.60296e-09	2.2674e-09	1.8895e-10	0.000240197
344	6.56146e-09	4.12922e-09	3.44102e-10	0.000437431
345	1.83573e-09	1.15525e-09	9.6271e-11	0.000122382
346	1.27317e-09	8.01226e-10	6.67688e-11	8.48781e-05
347	2.67727e-09	1.68484e-09	1.40404e-10	0.000178484
348	3.07572e-09	1.9356e-09	1.613e-10	0.000205048
349	4.12152e-09	2.59373e-09	2.16145e-10	0.000274768
350	9.42019e-10	5.92827e-10	4.94022e-11	6.28013e-05
351	3.2075e-09	2.01853e-09	1.68211e-10	0.000213834
352	2.05023e-09	1.29024e-09	1.0752e-10	0.000136682
353	1.78484e-09	1.12323e-09	9.36024e-11	0.00011899
354	2.05789e-09	1.29506e-09	1.07922e-10	0.000137193
355	1.80928e-09	1.13861e-09	9.48839e-11	0.000120619
356	2.22693e-09	1.40144e-09	1.16787e-10	0.000148462
357	1.80327e-09	1.13483e-09	9.45689e-11	0.000120218
358	3.12974e-09	1.96959e-09	1.64133e-10	0.000208649
359	1.30416e-09	8.2073e-10	6.83942e-11	8.69443e-05
360	2.81127e-09	1.76917e-09	1.47431e-10	0.000187418
361	1.35701e-09	8.53986e-10	7.11655e-11	9.04672e-05
362	3.67123e-09	2.31036e-09	1.9253e-10	0.000244748
363	1.72799e-09	1.08745e-09	9.06207e-11	0.000115199
364	3.29912e-09	2.07618e-09	1.73015e-10	0.000219941
365	2.97656e-09	1.87319e-09	1.56099e-10	0.000198437
366	3.45759e-09	2.17591e-09	1.81326e-10	0.000230506
367	4.00647e-09	2.52133e-09	2.10111e-10	0.000267098
368	3.20452e-09	2.01665e-09	1.68054e-10	0.000213635
369	4.09687e-09	2.57822e-09	2.14852e-10	0.000273125
370	1.20798e-09	7.602e-10	6.335e-11	8.0532e-05
371	2.38026e-09	1.49793e-09	1.24828e-10	0.000158684
372	3.86827e-09	2.43436e-09	2.02863e-10	0.000257885
373	6.33925e-09	3.98939e-09	3.32449e-10	0.000422617
374	1.68874e-09	1.06275e-09	8.85623e-11	0.000112582
375	1.48864e-09	9.36823e-10	7.80686e-11	9.92426e-05
376	3.30386e-09	2.07917e-09	1.73264e-10	0.000220257
377	4.38062e-09	2.75679e-09	2.29733e-10	0.000292042
378	3.07285e-09	1.93379e-09	1.61149e-10	0.000204857
379	6.13973e-10	3.86383e-10	3.21985e-11	4.09315e-05
380	1.49835e-09	9.42932e-10	7.85776e-11	9.98897e-05
381	4.452e-09	2.80171e-09	2.33476e-10	0.0002968
382	2.31793e-09	1.45871e-09	1.21559e-10	0.000154529
383	3.14002e-09	1.97606e-09	1.64672e-10	0.000209335
384	2.54016e-09	1.59856e-09	1.33214e-10	0.000169344
385	2.78783e-09	1.75443e-09	1.46202e-10	0.000185856
386	8.47504e-10	5.33347e-10	4.44456e-11	5.65003e-05
387	1.84926e-09	1.16376e-09	9.69803e-11	0.000123284
388	2.83746e-09	1.78566e-09	1.48805e-10	0.000189164
389	2.48863e-09	1.56613e-09	1.30511e-10	0.000165909
390	2.74604e-09	1.72813e-09	1.4401e-10	0.000183069
391	1.99371e-09	1.25467e-09	1.04556e-10	0.000132914
392	5.44662e-09	3.42764e-09	2.85637e-10	0.000363108
393	2.52764e-09	1.59068e-09	1.32557e-10	0.00016851
394	2.48712e-09	1.56518e-09	1.30432e-10	0.000165808
395	2.39249e-09	1.50563e-09	1.25469e-10	0.0001595
396	2.96441e-09	1.86555e-09	1.55462e-10	0.000197627
397	1.25112e-09	7.8735e-10	6.56125e-11	8.34081e-05
398	5.3415e-09	3.36148e-09	2.80124e-10	0.0003561
399	2.94959e-09	1.85622e-09	1.54685e-10	0.000196639
400	2.48004e-09	1.56072e-09	1.3006e-10	0.000165336
401	6.67305e-09	4.19945e-09	3.49954e-10	0.00044487
402	2.40411e-09	1.51294e-09	1.26079e-10	0.000160274
403	2.33295e-09	1.46816e-09	1.22347e-10	0.00015553
404	4.9915e-09	3.14123e-09	2.61769e-10	0.000332767
405	3.87012e-09	2.43553e-09	2.0296e-10	0.000258008
406	4.21842e-09	2.65471e-09	2.21226e-10	0.000281228
407	3.67004e-09	2.30961e-09	1.92468e-10	0.000244669
408	3.23167e-09	2.03374e-09	1.69478e-10	0.000215445
409	3.36095e-09	2.1151e-09	1.76258e-10	0.000224063
410	4.25069e-09	2.67502e-09	2.22918e-10	0.000283379
411	1.55542e-09	9.78847e-10	8.15706e-11	0.000103694
412	2.4458e-09	1.53918e-09	1.28265e-10	0.000163053
413	2.15601e-09	1.35681e-09	1.13068e-10	0.000143734
414	2.1318e-09	1.34158e-09	1.11798e-10	0.00014212
415	5.18176e-09	3.26096e-09	2.71746e-10	0.00034545
416	1.89462e-09	1.19231e-09	9.93595e-11	0.000126308
417	2.38346e-09	1.49995e-09	1.24995e-10	0.000158897
418	3.03397e-09	1.90932e-09	1.5911e-10	0.000202265
419	2.37186e-09	1.49265e-09	1.24387e-10	0.000158124
420	2.59167e-09	1.63098e-09	1.35915e-10	0.000172778
421	1.21276e-09	7.63208e-10	6.36006e-11	8.08506e-05
422	2.34768e-09	1.47743e-09	1.23119e-10	0.000156512
423	1.48166e-09	9.32429e-10	7.77024e-11	9.87771e-05
424	1.85809e-09	1.16933e-09	9.74438e-11	0.000123873
425	2.03111e-09	1.27821e-09	1.06517e-10	0.000135408
426	5.61478e-09	3.53347e-09	2.94455e-10	0.000374319
427	1.79877e-09	1.13199e-09	9.43328e-11	0.000119918
428	3.10875e-09	1.95638e-09	1.63032e-10	0.00020725
429	2.76928e-09	1.74275e-09	1.45229e-10	0.000184619
430	3.59102e-09	2.25988e-09	1.88324e-10	0.000239402
431	2.45155e-09	1.54279e-09	1.28566e-10	0.000163436
432	2.1986e-09	1.38361e-09	1.15301e-10	0.000146573
433	3.45765e-09	2.17595e-09	1.81329e-10	0.00023051
434	1.45502e-09	9.15665e-10	7.63054e-11	9.70012e-05
435	2.57168e-09	1.6184e-09	1.34866e-10	0.000171445
436	8.41222e-10	5.29394e-10	4.41162e-11	5.60815e-05
437	1.89143e-09	1.1903e-09	9.91921e-11	0.000126095
438	1.54339e-09	9.71281e-10	8.09401e-11	0.000102893
439	1.75563e-09	1.10484e-09	9.20702e-11	0.000117042
440	2.21213e-09	1.39213e-09	1.16011e-10	0.000147475
441	4.23094e-09	2.66259e-09	2.21883e-10	0.000282063
442	4.73347e-09	2.97884e-09	2.48237e-10	0.000315564
443	3.05363e-09	1.92169e-09	1.60141e-10	0.000203575
444	2.0332e-09	1.27952e-09	1.06627e-10	0.000135546
445	1.28365e-09	8.07818e-10	6.73182e-11	8.55765e-05
446	2.30141e-09	1.44831e-09	1.20693e-10	0.000153427
447	4.43833e-09	2.79311e-09	2.32759e-10	0.000295889
448	4.08388e-09	2.57005e-09	2.14171e-10	0.000272259
449	3.40673e-09	2.14391e-09	1.78659e-10	0.000227116
450	1.97527e-09	1.24307e-09	1.03589e-10	0.000131684
451	2.50657e-09	1.57742e-09	1.31452e-10	0.000167104
452	3.76946e-09	2.37218e-09	1.97682e-10	0.000251298
453	4.85829e-09	3.0574e-09	2.54783e-10	0.000323886
454	2.89647e-09	1.82279e-09	1.51899e-10	0.000193098
455	3.03398e-09	1.90933e-09	1.59111e-10	0.000202265
456	1.64912e-09	1.03782e-09	8.64847e-11	0.000109941
457	1.56948e-09	9.87696e-10	8.2308e-11	0.000104632
458	3.2883e-09	2.06938e-09	1.72448e-10	0.00021922
459	3.21769e-09	2.02494e-09	1.68745e-10	0.000214513
460	3.05914e-09	1.92516e-09	1.6043e-10	0.000203943
461	1.62714e-09	1.02398e-09	8.53319e-11	0.000108476
462	3.91508e-09	2.46382e-09	2.05318e-10	0.000261006
463	5.76884e-09	3.63042e-09	3.02535e-10	0.000384589
464	4.64477e-09	2.92302e-09	2.43585e-10	0.000309651
465	3.80696e-09	2.39578e-09	1.99648e-10	0.000253797
466	1.23882e-09	7.79611e-10	6.49676e-11	8.25883e-05
467	4.4391e-09	2.79359e-09	2.32799e-10	0.00029594
468	1.29835e-09	8.17069e-10	6.80891e-11	8.65564e-05
469	1.99431e-09	1.25505e-09	1.04587e-10	0.000132954
470	2.11412e-09	1.33045e-09	1.10871e-10	0.000140941
471	3.41415e-09	2.14857e-09	1.79048e-10	0.00022761
472	1.84553e-09	1.16142e-09	9.67849e-11	0.000123035
473	1.85066e-09	1.16465e-09	9.70542e-11	0.000123378
474	3.23389e-09	2.03514e-09	1.69595e-10	0.000215593
475	2.25565e-09	1.41952e-09	1.18293e-10	0.000150377
476	2.869e-09	1.8055e-09	1.50459e-10	0.000191267
477	2.06702e-09	1.3008e-09	1.084e-10	0.000137801
478	1.38043e-09	8.68725e-10	7.23937e-11	9.20286e-05
479	1.15979e-09	7.29876e-10	6.0823e-11	7.73196e-05
480	1.87917e-09	1.18259e-09	9.85491e-11	0.000125278
481	3.01649e-09	1.89833e-09	1.58194e-10	0.0002011
482	1.73919e-09	1.0945e-09	9.12081e-11	0.000115946
483	2.18228e-09	1.37334e-09	1.14445e-10	0.000145485
484	2.35931e-09	1.48475e-09	1.23729e-10	0.000157287
485	1.48374e-09	9.33742e-10	7.78118e-11	9.89162e-05
486	2.66978e-09	1.68013e-09	1.40011e-10	0.000177986
487	4.24105e-09	2.66896e-09	2.22413e-10	0.000282737
488	1.07567e-09	6.76933e-10	5.64111e-11	7.17111e-05
489	3.9965e-09	2.51506e-09	2.09588e-10	0.000266433
490	1.48144e-09	9.32295e-10	7.76913e-11	9.8763e-05
491	3.80142e-09	2.39229e-09	1.99358e-10	0.000253428
492	2.4422e-09	1.53692e-09	1.28076e-10	0.000162814
493	2.76361e-09	1.73918e-09	1.44932e-10	0.000184241
494	1.65751e-09	1.0431e-09	8.69248e-11	0.000110501
495	4.97803e-09	3.13275e-09	2.61063e-10	0.000331869
496	1.06098e-09	6.6769e-10	5.56408e-11	7.07319e-05
497	1.56157e-09	9.82719e-10	8.18933e-11	0.000104105
498	1.34487e-09	8.46347e-10	7.05289e-11	8.9658e-05
499	2.81179e-09	1.7695e-09	1.47458e-10	0.000187453
500	2.40169e-09	1.51142e-09	1.25952e-10	0.000160113
501	3.30704e-09	2.08117e-09	1.73431e-10	0.000220469
502	3.93684e-09	2.47751e-09	2.06459e-10	0.000262456
503	1.53086e-09	9.63392e-10	8.02826e-11	0.000102057
504	1.67373e-09	1.0533e-09	8.77752e-11	0.000111582
505	7.9556e-09	5.00658e-09	4.17215e-10	0.000530373
506	2.16982e-09	1.3655e-09	1.13791e-10	0.000144654
507	2.08127e-09	1.30978e-09	1.09148e-10	0.000138751
508	1.75995e-09	1.10756e-09	9.22969e-11	0.00011733
509	4.99302e-09	3.14218e-09	2.61848e-10	0.000332868
510	2.96241e-09	1.86429e-09	1.55357e-10	0.000197494
511	1.44022e-09	9.06353e-10	7.55294e-11	9.60147e-05
512	3.9456e-09	2.48303e-09	2.06919e-10	0.00026304
513	8.48074e-10	5.33706e-10	4.44755e-11	5.65383e-05
514	2.90286e-09	1.82681e-09	1.52234e-10	0.000193524
515	3.14367e-09	1.97836e-09	1.64863e-10	0.000209578
516	2.28983e-09	1.44103e-09	1.20085e-10	0.000152655
517	3.68183e-09	2.31703e-09	1.93086e-10	0.000245455
518	3.63131e-09	2.28524e-09	1.90436e-10	0.000242087
519	2.10133e-09	1.3224e-09	1.102e-10	0.000140089
520	1.86834e-09	1.17577e-09	9.7981e-11	0.000124556
521	1.9471e-09	1.22534e-09	1.02111e-10	0.000129806
522	1.25462e-09	7.89554e-10	6.57962e-11	8.36416e-05
523	2.67677e-09	1.68453e-09	1.40378e-10	0.000178451
524	2.9328e-09	1.84566e-09	1.53805e-10	0.00019552
525	1.67748e-09	1.05566e-09	8.79719e-11	0.000111832
526	2.51309e-09	1.58153e-09	1.31794e-10	0.00016754
527	2.33564e-09	1.46986e-09	1.22488e-10	0.00015571
528	4.08994e-09	2.57386e-09	2.14488e-10	0.000272662
529	4.52502e-09	2.84767e-09	2.37306e-10	0.000301668
530	3.10684e-09	1.95518e-09	1.62932e-10	0.000207122
531	2.78458e-09	1.75238e-09	1.46032e-10	0.000185639
532	1.23856e-09	7.79447e-10	6.49539e-11	8.25709e-05
533	2.82185e-09	1.77583e-09	1.47986e-10	0.000188123
534	1.40389e-09	8.8349e-10	7.36242e-11	9.35927e-05
535	3.45826e-09	2.17633e-09	1.81361e-10	0.000230551
536	2.77854e-09	1.74858e-09	1.45715e-10	0.000185236
537	4.73581e-09	2.98032e-09	2.4836e-10	0.000315721
538	2.62961e-09	1.65485e-09	1.37904e-10	0.000175307
539	2.51128e-09	1.58039e-09	1.31699e-10	0.000167419
540	2.24705e-09	1.4141e-09	1.17842e-10	0.000149803
541	2.64864e-09	1.66683e-09	1.38903e-10	0.000176576
542	2.22065e-09	1.39749e-09	1.16458e-10	0.000148044
543	6.7208e-09	4.2295e-09	3.52458e-10	0.000448053
544	3.30667e-09	2.08094e-09	1.73411e-10	0.000220445
545	2.62496e-09	1.65193e-09	1.37661e-10	0.000174998
546	3.4941e-09	2.19889e-09	1.83241e-10	0.00023294
547	5.61344e-09	3.53262e-09	2.94385e-10	0.000374229
548	4.44466e-09	2.79709e-09	2.33091e-10	0.00029631
549	2.27497e-09	1.43167e-09	1.19306e-10	0.000151664
550	4.88905e-09	3.07675e-09	2.56396e-10	0.000325936
551	1.75623e-09	1.10522e-09	9.21018e-11	0.000117082
552	1.46874e-09	9.24301e-10	7.70251e-11	9.7916e-05
553	2.55019e-09	1.60487e-09	1.33739e-10	0.000170013
554	5.03571e-09	3.16905e-09	2.64087e-10	0.000335714
555	8.67138e-09	5.45703e-09	4.54753e-10	0.000578092
556	4.06447e-09	2.55783e-09	2.13153e-10	0.000270965
557	3.32567e-09	2.09289e-09	1.74408e-10	0.000221711
558	3.94248e-09	2.48106e-09	2.06755e-10	0.000262832
559	4.67394e-09	2.94138e-09	2.45115e-10	0.000311596
560	2.49775e-09	1.57187e-09	1.30989e-10	0.000166517
561	1.97567e-09	1.24332e-09	1.0361e-10	0.000131711
562	4.64687e-09	2.92435e-09	2.43695e-10	0.000309791
563	1.82786e-09	1.1503e-09	9.58584e-11	0.000121857
564	2.0277e-09	1.27606e-09	1.06338e-10	0.00013518
565	4.50812e-09	2.83703e-09	2.36419e-10	0.000300542
566	1.44572e-09	9.09812e-10	7.58177e-11	9.63812e-05
567	3.44969e-09	2.17094e-09	1.80912e-10	0.00022998
568	1.6718e-09	1.05209e-09	8.76742e-11	0.000111453
569	2.71635e-09	1.70944e-09	1.42453e-10	0.00018109
570	3.5034e-09	2.20474e-09	1.83728e-10	0.00023356
571	1.28751e-09	8.10252e-10	6.7521e-11	8.58343e-05
572	1.95625e-09	1.2311e-09	1.02591e-10	0.000130417
573	3.8046e-09	2.39429e-09	1.99524e-10	0.00025364
574	3.20968e-09	2.0199e-09	1.68325e-10	0.000213979
575	1.65585e-09	1.04205e-09	8.68376e-11	0.00011039
576	2.06195e-09	1.29762e-09	1.08135e-10	0.000137464
577	2.11805e-09	1.33292e-09	1.11077e-10	0.000141204
578	2.22445e-09	1.39988e-09	1.16657e-10	0.000148297
579	3.32125e-09	2.09011e-09	1.74176e-10	0.000221417
580	1.87484e-09	1.17987e-09	9.83222e-11	0.00012499
581	2.68898e-09	1.69222e-09	1.41018e-10	0.000179266
582	1.73164e-09	1.08975e-09	9.08123e-11	0.000115443
583	2.22958e-09	1.40311e-09	1.16926e-10	0.000148639
584	1.1339e-09	7.13581e-10	5.94651e-11	7.55934e-05
585	3.13005e-09	1.96979e-09	1.64149e-10	0.00020867
586	1.83287e-09	1.15345e-09	9.6121e-11	0.000122191
587	2.16539e-09	1.36271e-09	1.13559e-10	0.000144359
588	1.19547e-09	7.52325e-10	6.26938e-11	7.96978e-05
589	2.47092e-09	1.55499e-09	1.29582e-10	0.000164728
590	4.07184e-09	2.56247e-09	2.13539e-10	0.000271456
591	3.18439e-09	2.00399e-09	1.66999e-10	0.000212293
592	5.24907e-09	3.30332e-09	2.75276e-10	0.000349938
593	4.96148e-09	3.12233e-09	2.60194e-10	0.000330765
594	2.18926e-09	1.37773e-09	1.14811e-10	0.000145951
595	2.58021e-09	1.62377e-09	1.35314e-10	0.000172014
596	4.13092e-09	2.59965e-09	2.16638e-10	0.000275395
597	1.94768e-09	1.2257e-09	1.02142e-10	0.000129845
598	2.80379e-09	1.76447e-09	1.47039e-10	0.000186919
599	2.55222e-09	1.60615e-09	1.33846e-10	0.000170148
600	9.88794e-10	6.22263e-10	5.18552e-11	6.59196e-05
601	3.11818e-09	1.96232e-09	1.63527e-10	0.000207879
602	2.66239e-09	1.67548e-09	1.39623e-10	0.000177492
603	5.84071e-10	3.67565e-10	3.06304e-11	3.89381e-05
604	3.17243e-09	1.99646e-09	1.66372e-10	0.000211495
605	1.16724e-09	7.34561e-10	6.12134e-11	7.78159e-05
606	7.72177e-10	4.85942e-10	4.04952e-11	5.14785e-05
607	1.97124e-09	1.24053e-09	1.03378e-10	0.000131416
608	3.25128e-09	2.04608e-09	1.70506e-10	0.000216752
609	2.2767e-09	1.43276e-09	1.19397e-10	0.00015178
610	3.32518e-09	2.09259e-09	1.74382e-10	0.000221679
611	1.65935e-09	1.04425e-09	8.70212e-11	0.000110623
612	2.90132e-09	1.82584e-09	1.52154e-10	0.000193421
613	1.45485e-09	9.15557e-10	7.62964e-11	9.69898e-05
614	1.18081e-09	7.43103e-10	6.19253e-11	7.87208e-05
615	3.19248e-09	2.00908e-09	1.67423e-10	0.000212832
616	1.56067e-09	9.82153e-10	8.18461e-11	0.000104045
617	3.24407e-09	2.04154e-09	1.70128e-10	0.000216271
618	1.44988e-09	9.12433e-10	7.6036e-11	9.66588e-05
619	2.9733e-09	1.87114e-09	1.55929e-10	0.00019822
620	1.01865e-09	6.41054e-10	5.34212e-11	6.79103e-05
621	3.57823e-09	2.25183e-09	1.87653e-10	0.000238548
622	2.05286e-09	1.2919e-09	1.07658e-10	0.000136857
623	1.92959e-09	1.21432e-09	1.01193e-10	0.000128639
624	1.73283e-09	1.09049e-09	9.08744e-11	0.000115522
625	3.20724e-09	2.01836e-09	1.68197e-10	0.000213816
626	3.02729e-09	1.90512e-09	1.5876e-10	0.000201819
627	1.6475e-09	1.03679e-09	8.63995e-11	0.000109833
628	1.55456e-09	9.78308e-10	8.15257e-11	0.000103637
629	2.98129e-09	1.87617e-09	1.56348e-10	0.000198753
630	2.21068e-09	1.39122e-09	1.15935e-10	0.000147379
631	5.40939e-09	3.40421e-09	2.83684e-10	0.000360626
632	2.59838e-09	1.6352e-09	1.36266e-10	0.000173225
633	2.4406e-09	1.53591e-09	1.27992e-10	0.000162707
634	1.77929e-09	1.11974e-09	9.33113e-11	0.00011862
635	4.2975e-09	2.70448e-09	2.25374e-10	0.0002865
636	2.5023e-09	1.57474e-09	1.31228e-10	0.00016682
637	1.67619e-09	1.05485e-09	8.79045e-11	0.000111746
638	1.79894e-09	1.1321e-09	9.43418e-11	0.00011993
639	2.67871e-09	1.68575e-09	1.40479e-10	0.000178581
640	2.17029e-09	1.36579e-09	1.13816e-10	0.000144686
641	5.12814e-09	3.22722e-09	2.68935e-10	0.000341876
642	1.64887e-09	1.03766e-09	8.64717e-11	0.000109925
643	2.63859e-09	1.66051e-09	1.38376e-10	0.000175906
644	1.78414e-09	1.12279e-09	9.35658e-11	0.000118943
645	1.24251e-09	7.81932e-10	6.5161e-11	8.28342e-05
646	3.36497e-09	2.11763e-09	1.76469e-10	0.000224332
647	3.51181e-09	2.21004e-09	1.8417e-10	0.000234121
648	7.74153e-09	4.87186e-09	4.05988e-10	0.000516102
649	3.34215e-09	2.10326e-09	1.75272e-10	0.00022281
650	1.54031e-09	9.69339e-10	8.07782e-11	0.000102687
651	1.98216e-09	1.2474e-09	1.0395e-10	0.000132144
652	5.73353e-09	3.6082e-09	3.00683e-10	0.000382236
653	1.51327e-09	9.52324e-10	7.93603e-11	0.000100885
654	3.01905e-09	1.89993e-09	1.58328e-10	0.00020127
655	2.39192e-09	1.50527e-09	1.25439e-10	0.000159462
656	1.59014e-09	1.0007e-09	8.33917e-11	0.000106009
657	1.59554e-09	1.0041e-09	8.36747e-11	0.000106369
658	1.58722e-09	9.98862e-10	8.32385e-11	0.000105815
659	1.74111e-09	1.09571e-09	9.13088e-11	0.000116074
660	5.51207e-09	3.46883e-09	2.89069e-10	0.000367471
661	1.0275e-08	6.46623e-09	5.38852e-10	0.000685002
662	1.71532e-09	1.07948e-09	8.99563e-11	0.000114355
663	1.60123e-09	1.00768e-09	8.39731e-11	0.000106749
664	3.69824e-09	2.32736e-09	1.93946e-10	0.000246549
665	4.18363e-09	2.63282e-09	2.19402e-10	0.000278908
666	2.32509e-09	1.46322e-09	1.21935e-10	0.000155006
667	3.70329e-09	2.33054e-09	1.94212e-10	0.000246886
668	1.58591e-09	9.98039e-10	8.31699e-11	0.000105728
669	1.8624e-09	1.17204e-09	9.76699e-11	0.00012416
670	3.62493e-09	2.28122e-09	1.90102e-10	0.000241662
671	1.79401e-09	1.129e-09	9.40833e-11	0.000119601
672	2.55938e-09	1.61065e-09	1.34221e-10	0.000170625
673	2.78172e-09	1.75058e-09	1.45882e-10	0.000185448
674	2.57229e-09	1.61878e-09	1.34898e-10	0.000171486
675	2.96804e-09	1.86783e-09	1.55653e-10	0.000197869
676	2.09967e-09	1.32135e-09	1.10113e-10	0.000139978
677	1.44269e-09	9.07905e-10	7.56588e-11	9.61792e-05
678	2.66916e-09	1.67974e-09	1.39979e-10	0.000177944
679	1.1195e-09	7.04516e-10	5.87097e-11	7.46331e-05
680	3.30568e-09	2.08031e-09	1.73359e-10	0.000220378
681	1.52146e-09	9.5748e-10	7.979e-11	0.000101431
682	1.15926e-09	7.29541e-10	6.07951e-11	7.72841e-05
683	3.69209e-09	2.32349e-09	1.93624e-10	0.000246139
684	1.50798e-09	9.48993e-10	7.90827e-11	0.000100532
685	4.61907e-09	2.90685e-09	2.42238e-10	0.000307938
686	3.2567e-09	2.04949e-09	1.70791e-10	0.000217114
687	8.89051e-09	5.59493e-09	4.66244e-10	0.000592701
688	3.36191e-09	2.1157e-09	1.76309e-10	0.000224128
689	1.35773e-09	8.54441e-10	7.12034e-11	9.05155e-05
690	3.56185e-09	2.24153e-09	1.86794e-10	0.000237457
691	2.89796e-09	1.82373e-09	1.51977e-10	0.000193197
692	2.29035e-09	1.44135e-09	1.20113e-10	0.00015269
693	2.17028e-09	1.36579e-09	1.13816e-10	0.000144685
694	3.71748e-09	2.33947e-09	1.94956e-10	0.000247832
695	2.15097e-09	1.35364e-09	1.12803e-10	0.000143398
696	7.02189e-09	4.41898e-09	3.68248e-10	0.000468126
697	3.49051e-09	2.19663e-09	1.83052e-10	0.000232701
698	3.09133e-09	1.94542e-09	1.62118e-10	0.000206088
699	8.77443e-10	5.52188e-10	4.60157e-11	5.84962e-05
700	2.30578e-09	1.45106e-09	1.20922e-10	0.000153719
701	1.83667e-09	1.15585e-09	9.63205e-11	0.000122445
702	4.53754e-09	2.85554e-09	2.37962e-10	0.000302503
703	1.5765e-09	9.92116e-10	8.26763e-11	0.0001051
704	6.08555e-09	3.82973e-09	3.19144e-10	0.000405703
705	6.77834e-09	4.26571e-09	3.55476e-10	0.000451889
706	1.54594e-09	9.72884e-10	8.10737e-11	0.000103063
707	2.07359e-09	1.30494e-09	1.08745e-10	0.00013824
708	2.46743e-09	1.55279e-09	1.29399e-10	0.000164495
709	2.09659e-09	1.31941e-09	1.09951e-10	0.000139772
710	2.63848e-09	1.66044e-09	1.3837e-10	0.000175899
711	1.06915e-09	6.72831e-10	5.60692e-11	7.12765e-05
712	1.90005e-09	1.19573e-09	9.96441e-11	0.00012667
713	2.23638e-09	1.40739e-09	1.17282e-10	0.000149092
714	5.09681e-09	3.2075e-09	2.67292e-10	0.000339788
715	5.17666e-09	3.25775e-09	2.71479e-10	0.000345111
716	1.57001e-09	9.88031e-10	8.23359e-11	0.000104667
717	2.7104e-09	1.7057e-09	1.42141e-10	0.000180694
718	2.21787e-09	1.39574e-09	1.16312e-10	0.000147858
719	1.40359e-09	8.83302e-10	7.36085e-11	9.35728e-05
720	1.81756e-09	1.14382e-09	9.53183e-11	0.000121171
721	4.0426e-09	2.54407e-09	2.12006e-10	0.000269507
722	2.7213e-09	1.71255e-09	1.42713e-10	0.00018142
723	3.2929e-09	2.07227e-09	1.72689e-10	0.000219527
724	4.2583e-09	2.67981e-09	2.23318e-10	0.000283886
725	2.51061e-09	1.57996e-09	1.31664e-10	0.000167374
726	1.87712e-09	1.1813e-09	9.84418e-11	0.000125141
727	1.26055e-09	7.93286e-10	6.61071e-11	8.4037e-05
728	3.64092e-09	2.29129e-09	1.90941e-10	0.000242728
729	1.87902e-09	1.1825e-09	9.85413e-11	0.000125268
730	2.77262e-09	1.74485e-09	1.45404e-10	0.000184841
731	3.93718e-09	2.47773e-09	2.06477e-10	0.000262479
732	1.96061e-09	1.23384e-09	1.0282e-10	0.000130707
733	3.81828e-09	2.4029e-09	2.00242e-10	0.000254552
734	1.84301e-09	1.15983e-09	9.66528e-11	0.000122867
735	1.04168e-09	6.55545e-10	5.46288e-11	6.94454e-05
736	3.62097e-09	2.27873e-09	1.89894e-10	0.000241398
737	1.77594e-09	1.11763e-09	9.31356e-11	0.000118396
738	2.23046e-09	1.40366e-09	1.16972e-10	0.000148698
739	2.09789e-09	1.32023e-09	1.10019e-10	0.000139859
740	1.05082e-09	6.61295e-10	5.51079e-11	7.00544e-05
741	2.45617e-09	1.54571e-09	1.28809e-10	0.000163745
742	2.81349e-09	1.77057e-09	1.47548e-10	0.000187566
743	2.82501e-09	1.77782e-09	1.48152e-10	0.000188334
744	2.71338e-09	1.70757e-09	1.42297e-10	0.000180892
745	1.9738e-09	1.24214e-09	1.03512e-10	0.000131587
746	2.27714e-09	1.43304e-09	1.1942e-10	0.000151809
747	2.47308e-09	1.55634e-09	1.29695e-10	0.000164872
748	3.54319e-09	2.22978e-09	1.85815e-10	0.000236213
749	4.40982e-09	2.77516e-09	2.31264e-10	0.000293988
750	2.81286e-09	1.77017e-09	1.47514e-10	0.000187524
751	4.67212e-09	2.94024e-09	2.4502e-10	0.000311475
752	3.11029e-09	1.95735e-09	1.63113e-10	0.000207352
753	3.56244e-09	2.2419e-09	1.86825e-10	0.000237496
754	3.5785e-09	2.25201e-09	1.87667e-10	0.000238567
755	3.30473e-09	2.07971e-09	1.7331e-10	0.000220315
756	2.04441e-09	1.28658e-09	1.07215e-10	0.000136294
757	1.28553e-09	8.09004e-10	6.7417e-11	8.57021e-05
758	3.06187e-09	1.92688e-09	1.60573e-10	0.000204125
759	1.60661e-09	1.01106e-09	8.42553e-11	0.000107107
760	1.71421e-09	1.07878e-09	8.98984e-11	0.000114281
761	3.49318e-09	2.19831e-09	1.83192e-10	0.000232878
762	1.99499e-09	1.25547e-09	1.04623e-10	0.000132999
763	1.27619e-09	8.03124e-10	6.6927e-11	8.50792e-05
764	1.19945e-09	7.54831e-10	6.29026e-11	7.99633e-05
765	2.22314e-09	1.39906e-09	1.16588e-10	0.000148209
766	2.42894e-09	1.52857e-09	1.27381e-10	0.000161929
767	1.16106e-09	7.30676e-10	6.08896e-11	7.74043e-05
768	3.22317e-09	2.02839e-09	1.69032e-10	0.000214878
769	3.33e-09	2.09562e-09	1.74635e-10	0.000222
770	3.64694e-09	2.29507e-09	1.91256e-10	0.000243129
771	7.61015e-10	4.78918e-10	3.99099e-11	5.07343e-05
772	1.89183e-09	1.19056e-09	9.92129e-11	0.000126122
773	1.71721e-09	1.08067e-09	9.00557e-11	0.000114481
774	2.98492e-09	1.87845e-09	1.56538e-10	0.000198994
775	2.53041e-09	1.59243e-09	1.32702e-10	0.000168694
776	1.80554e-09	1.13626e-09	9.4688e-11	0.00012037
777	1.79365e-09	1.12877e-09	9.40644e-11	0.000119577
778	5.6949e-09	3.58389e-09	2.98657e-10	0.00037966
779	3.82059e-09	2.40436e-09	2.00363e-10	0.000254706
780	8.0313e-09	5.05422e-09	4.21185e-10	0.00053542
781	2.1198e-09	1.33402e-09	1.11168e-10	0.00014132
782	3.05489e-09	1.92249e-09	1.60208e-10	0.00020366
783	2.28753e-09	1.43958e-09	1.19965e-10	0.000152502
784	1.46972e-09	9.2492e-10	7.70766e-11	9.79816e-05
785	2.55728e-09	1.60933e-09	1.34111e-10	0.000170485
786	3.54744e-09	2.23246e-09	1.86038e-10	0.000236496
787	6.45316e-09	4.06107e-09	3.38423e-10	0.000430211
788	2.0086e-09	1.26404e-09	1.05337e-10	0.000133907
789	2.79145e-09	1.7567e-09	1.46392e-10	0.000186097
790	9.99598e-10	6.29062e-10	5.24218e-11	6.66399e-05
791	2.41158e-09	1.51764e-09	1.2647e-10	0.000160772
792	4.02267e-09	2.53153e-09	2.1096e-10	0.000268178
793	2.03512e-09	1.28073e-09	1.06728e-10	0.000135675
794	5.03531e-09	3.1688e-09	2.64067e-10	0.000335688
795	2.88272e-09	1.81414e-09	1.51178e-10	0.000192181
796	2.00076e-09	1.25911e-09	1.04926e-10	0.000133384
797	3.27754e-09	2.06261e-09	1.71884e-10	0.000218503
798	1.74558e-09	1.09852e-09	9.15435e-11	0.000116372
799	5.08397e-09	3.19942e-09	2.66618e-10	0.000338931
800	3.3218e-09	2.09046e-09	1.74205e-10	0.000221453
801	1.98123e-09	1.24682e-09	1.03902e-10	0.000132082
802	3.53002e-09	2.2215e-09	1.85125e-10	0.000235335
803	1.1151e-09	7.01748e-10	5.8479e-11	7.43398e-05
804	7.45775e-10	4.69327e-10	3.91106e-11	4.97183e-05
805	6.02926e-09	3.79431e-09	3.16192e-10	0.000401951
806	2.26037e-09	1.42249e-09	1.1854e-10	0.000150691
807	1.58454e-09	9.97176e-10	8.3098e-11	0.000105636
808	1.20501e-09	7.58333e-10	6.31944e-11	8.03342e-05
809	3.23552e-09	2.03616e-09	1.6968e-10	0.000215702
810	3.29258e-09	2.07207e-09	1.72673e-10	0.000219506
811	2.54351e-09	1.60067e-09	1.33389e-10	0.000169567
812	4.73613e-09	2.98052e-09	2.48376e-10	0.000315742
813	1.93186e-09	1.21575e-09	1.01312e-10	0.00012879
814	5.75623e-09	3.62248e-09	3.01873e-10	0.000383749
815	1.29277e-09	8.13561e-10	6.77968e-11	8.61848e-05
816	1.09487e-09	6.89021e-10	5.74184e-11	7.29916e-05
817	2.82791e-09	1.77965e-09	1.48304e-10	0.000188527
818	5.43292e-09	3.41902e-09	2.84918e-10	0.000362195
819	4.62603e-09	2.91123e-09	2.42602e-10	0.000308402
820	1.77947e-09	1.11984e-09	9.33204e-11	0.000118631
821	7.8078e-09	4.91356e-09	4.09464e-10	0.00052052
822	8.35245e-10	5.25632e-10	4.38027e-11	5.5683e-05
823	2.41867e-09	1.52211e-09	1.26842e-10	0.000161245
824	6.72496e-09	4.23212e-09	3.52677e-10	0.000448331
825	3.10663e-09	1.95505e-09	1.62921e-10	0.000207109
826	3.21522e-09	2.02339e-09	1.68616e-10	0.000214348
827	1.29874e-09	8.17317e-10	6.81098e-11	8.65827e-05
828	1.41837e-09	8.92602e-10	7.43835e-11	9.45581e-05
829	2.06305e-09	1.29831e-09	1.08192e-10	0.000137537
830	1.73962e-09	1.09477e-09	9.12306e-11	0.000115974
831	3.63834e-09	2.28966e-09	1.90805e-10	0.000242556
832	3.19126e-09	2.00831e-09	1.67359e-10	0.000212751
833	2.43404e-09	1.53178e-09	1.27648e-10	0.000162269
834	3.41302e-09	2.14787e-09	1.78989e-10	0.000227535
835	1.95164e-09	1.2282e-09	1.0235e-10	0.00013011
836	8.32125e-10	5.23669e-10	4.36391e-11	5.5475e-05
837	1.82661e-09	1.14951e-09	9.57928e-11	0.000121774
838	5.48309e-10	3.45059e-10	2.87549e-11	3.65539e-05
839	3.03919e-09	1.91261e-09	1.59384e-10	0.000202613
840	1.48723e-09	9.35935e-10	7.79946e-11	9.91486e-05
841	1.6829e-09	1.05907e-09	8.82561e-11	0.000112193
842	4.71027e-09	2.96424e-09	2.4702e-10	0.000314018
843	2.54757e-09	1.60322e-09	1.33602e-10	0.000169838
844	5.70534e-09	3.59046e-09	2.99205e-10	0.000380356
845	3.04699e-09	1.91752e-09	1.59793e-10	0.000203133
846	3.40289e-09	2.14149e-09	1.78458e-10	0.00022686
847	3.69205e-09	2.32346e-09	1.93622e-10	0.000246137
848	3.17233e-09	1.9964e-09	1.66366e-10	0.000211489
849	1.68386e-09	1.05968e-09	8.83065e-11	0.000112257
850	1.97587e-09	1.24344e-09	1.0362e-10	0.000131725
851	1.1098e-09	6.98412e-10	5.8201e-11	7.39865e-05
852	4.76341e-09	2.99768e-09	2.49807e-10	0.00031756
853	1.69066e-09	1.06396e-09	8.86631e-11	0.000112711
854	2.13282e-09	1.34221e-09	1.11851e-10	0.000142188
855	2.64878e-09	1.66692e-09	1.3891e-10	0.000176585
856	1.61178e-09	1.01432e-09	8.45263e-11	0.000107452
857	2.86771e-09	1.80469e-09	1.50391e-10	0.000191181
858	1.93236e-09	1.21606e-09	1.01339e-10	0.000128824
859	2.65841e-09	1.67297e-09	1.39415e-10	0.000177227
860	3.78098e-09	2.37943e-09	1.98285e-10	0.000252065
861	1.70265e-09	1.0715e-09	8.92919e-11	0.00011351
862	5.2249e-09	3.28811e-09	2.74009e-10	0.000348327
863	2.36186e-09	1.48635e-09	1.23863e-10	0.000157457
864	1.76331e-09	1.10968e-09	9.2473e-11	0.000117554
865	2.89973e-09	1.82484e-09	1.5207e-10	0.000193315
866	2.8052e-09	1.76535e-09	1.47113e-10	0.000187013
867	1.0406e-09	6.54864e-10	5.4572e-11	6.93732e-05
868	1.81289e-09	1.14088e-09	9.50732e-11	0.000120859
869	2.31867e-09	1.45918e-09	1.21598e-10	0.000154578
870	1.59474e-09	1.00359e-09	8.36328e-11	0.000106316
871	1.60022e-09	1.00704e-09	8.392e-11	0.000106681
872	1.38936e-09	8.74346e-10	7.28621e-11	9.2624e-05
873	1.75893e-09	1.10692e-09	9.22433e-11	0.000117262
874	1.61491e-09	1.01629e-09	8.46907e-11	0.000107661
875	3.1625e-09	1.99021e-09	1.65851e-10	0.000210833
876	4.37774e-09	2.75498e-09	2.29581e-10	0.000291849
877	2.45087e-09	1.54237e-09	1.28531e-10	0.000163391
878	1.43182e-09	9.01067e-10	7.50889e-11	9.54547e-05
879	3.24002e-09	2.03899e-09	1.69916e-10	0.000216001
880	3.4859e-09	2.19373e-09	1.82811e-10	0.000232394
881	1.81591e-09	1.14278e-09	9.52319e-11	0.000121061
882	1.7506e-09	1.10168e-09	9.18065e-11	0.000116707
883	1.61703e-09	1.01762e-09	8.48019e-11	0.000107802
884	3.36801e-09	2.11954e-09	1.76628e-10	0.000224534
885	8.67663e-10	5.46033e-10	4.55028e-11	5.78442e-05
886	2.50382e-09	1.57569e-09	1.31308e-10	0.000166921
887	1.63299e-09	1.02766e-09	8.56386e-11	0.000108866
888	2.52418e-09	1.58851e-09	1.32375e-10	0.000168279
889	2.2713e-09	1.42936e-09	1.19114e-10	0.00015142
890	1.55738e-09	9.80084e-10	8.16737e-11	0.000103825
891	7.50448e-09	4.72268e-09	3.93557e-10	0.000500299
892	2.00772e-09	1.26349e-09	1.0529e-10	0.000133848
893	1.58006e-09	9.94352e-10	8.28627e-11	0.000105337
894	4.08787e-09	2.57256e-09	2.1438e-10	0.000272525
895	1.92125e-09	1.20907e-09	1.00756e-10	0.000128083
896	1.06138e-09	6.6794e-10	5.56617e-11	7.07584e-05
897	1.08835e-09	6.84914e-10	5.70762e-11	7.25566e-05
898	5.44742e-09	3.42815e-09	2.85679e-10	0.000363162
899	1.3654e-09	8.59264e-10	7.16054e-11	9.10264e-05
900	2.36967e-09	1.49127e-09	1.24272e-10	0.000157978
901	2.50265e-09	1.57496e-09	1.31246e-10	0.000166843
902	5.79185e-09	3.6449e-09	3.03742e-10	0.000386123
903	3.47413e-09	2.18632e-09	1.82194e-10	0.000231609
904	4.53734e-09	2.85542e-09	2.37951e-10	0.000302489
905	8.69274e-10	5.47047e-10	4.55872e-11	5.79516e-05
906	3.25232e-09	2.04674e-09	1.70561e-10	0.000216822
907	1.23133e-09	7.74892e-10	6.45743e-11	8.20884e-05
908	1.97005e-09	1.23978e-09	1.03315e-10	0.000131336
909	3.81338e-09	2.39982e-09	1.99985e-10	0.000254225
910	2.78409e-09	1.75207e-09	1.46006e-10	0.000185606
911	1.29615e-09	8.15688e-10	6.7974e-11	8.64101e-05
912	2.89414e-09	1.82132e-09	1.51777e-10	0.000192942
913	3.38327e-09	2.12914e-09	1.77428e-10	0.000225551
914	1.99782e-09	1.25726e-09	1.04771e-10	0.000133188
915	3.06622e-09	1.92962e-09	1.60801e-10	0.000204415
916	2.82544e-09	1.77809e-09	1.48174e-10	0.000188363
917	2.1154e-09	1.33125e-09	1.10938e-10	0.000141027
918	3.09795e-09	1.94959e-09	1.62466e-10	0.00020653
919	2.18243e-09	1.37344e-09	1.14453e-10	0.000145495
920	2.53664e-09	1.59635e-09	1.33029e-10	0.00016911
921	4.38833e-09	2.76164e-09	2.30137e-10	0.000292555
922	2.14799e-09	1.35176e-09	1.12647e-10	0.000143199
923	2.85868e-09	1.79901e-09	1.49918e-10	0.000190579
924	3.83016e-09	2.41038e-09	2.00865e-10	0.000255344
925	3.24381e-09	2.04138e-09	1.70115e-10	0.000216254
926	2.08669e-09	1.31319e-09	1.09432e-10	0.000139113
927	2.70127e-09	1.69995e-09	1.41662e-10	0.000180084
928	4.19594e-09	2.64057e-09	2.20047e-10	0.000279729
929	2.71032e-09	1.70564e-09	1.42137e-10	0.000180688
930	1.39051e-09	8.75067e-10	7.29223e-11	9.27005e-05
931	8.6764e-10	5.46019e-10	4.55016e-11	5.78427e-05
932	3.51317e-09	2.21089e-09	1.84241e-10	0.000234212
933	2.60931e-09	1.64208e-09	1.3684e-10	0.000173954
934	1.69546e-09	1.06698e-09	8.89148e-11	0.000113031
935	3.85833e-09	2.42811e-09	2.02342e-10	0.000257222
936	8.04503e-09	5.06286e-09	4.21905e-10	0.000536335
937	2.99474e-09	1.88464e-09	1.57053e-10	0.00019965
938	2.4523e-09	1.54327e-09	1.28606e-10	0.000163487
939	2.24922e-09	1.41547e-09	1.17955e-10	0.000149948
940	1.65704e-09	1.0428e-09	8.69e-11	0.000110469
941	2.3213e-09	1.46083e-09	1.21736e-10	0.000154753
942	2.14992e-09	1.35297e-09	1.12748e-10	0.000143328
943	1.23704e-09	7.78488e-10	6.4874e-11	8.24694e-05
944	1.31035e-09	8.24624e-10	6.87186e-11	8.73567e-05
945	1.73862e-09	1.09414e-09	9.11782e-11	0.000115908
946	2.39922e-09	1.50987e-09	1.25822e-10	0.000159948
947	3.18601e-09	2.005e-09	1.67084e-10	0.000212401
948	5.81715e-09	3.66082e-09	3.05068e-10	0.00038781
949	4.89741e-09	3.08202e-09	2.56835e-10	0.000326494
950	3.04581e-09	1.91677e-09	1.59731e-10	0.000203054
951	1.67549e-09	1.05441e-09	8.78675e-11	0.000111699
952	1.91363e-09	1.20428e-09	1.00356e-10	0.000127575
953	1.2567e-09	7.9086e-10	6.5905e-11	8.378e-05
954	1.62783e-09	1.02442e-09	8.5368e-11	0.000108522
955	1.86575e-09	1.17415e-09	9.78456e-11	0.000124384
956	2.57746e-09	1.62203e-09	1.35169e-10	0.00017183
957	1.10809e-09	6.97336e-10	5.81113e-11	7.38725e-05
958	9.22717e-10	5.8068e-10	4.839e-11	6.15145e-05
959	1.84625e-09	1.16187e-09	9.68229e-11	0.000123083
960	1.20375e-09	7.57539e-10	6.31282e-11	8.02501e-05
961	2.84543e-09	1.79067e-09	1.49223e-10	0.000189695
962	3.13139e-09	1.97063e-09	1.64219e-10	0.000208759
963	3.29142e-09	2.07134e-09	1.72612e-10	0.000219428
964	5.77102e-09	3.63179e-09	3.02649e-10	0.000384735
965	3.90475e-09	2.45732e-09	2.04776e-10	0.000260316
966	4.15385e-09	2.61408e-09	2.1784e-10	0.000276924
967	9.95672e-10	6.26591e-10	5.2216e-11	6.63781e-05
968	1.11971e-08	7.04652e-09	5.8721e-10	0.000746475
969	4.41596e-09	2.77903e-09	2.31586e-10	0.000294398
970	4.41302e-09	2.77718e-09	2.31432e-10	0.000294201
971	1.366e-09	8.59643e-10	7.1637e-11	9.10666e-05
972	1.53246e-09	9.644e-10	8.03667e-11	0.000102164
973	1.76577e-09	1.11122e-09	9.2602e-11	0.000117718
974	2.64041e-09	1.66165e-09	1.38471e-10	0.000176028
975	1.22488e-09	7.70833e-10	6.42361e-11	8.16584e-05
976	3.20516e-09	2.01705e-09	1.68088e-10	0.000213677
977	2.85854e-09	1.79892e-09	1.4991e-10	0.000190569
978	3.33923e-09	2.10143e-09	1.75119e-10	0.000222615
979	2.37675e-09	1.49572e-09	1.24644e-10	0.00015845
980	3.49186e-09	2.19748e-09	1.83123e-10	0.000232791
981	4.3761e-09	2.75394e-09	2.29495e-10	0.00029174
982	2.39837e-09	1.50933e-09	1.25777e-10	0.000159891
983	3.62042e-09	2.27839e-09	1.89866e-10	0.000241362
984	3.2492e-09	2.04477e-09	1.70398e-10	0.000216613
985	1.52313e-09	9.58529e-10	7.98774e-11	0.000101542
986	3.78482e-09	2.38185e-09	1.98487e-10	0.000252321
987	2.4658e-09	1.55177e-09	1.29314e-10	0.000164387
988	1.62662e-09	1.02366e-09	8.53047e-11	0.000108441
989	3.75929e-09	2.36578e-09	1.97148e-10	0.000250619
990	2.14369e-09	1.34906e-09	1.12421e-10	0.000142913
991	2.60986e-09	1.64242e-09	1.36869e-10	0.000173991
992	2.67188e-09	1.68145e-09	1.40121e-10	0.000178125
993	3.36516e-09	2.11775e-09	1.76479e-10	0.000224344
994	2.99328e-09	1.88372e-09	1.56976e-10	0.000199552
995	7.61405e-10	4.79163e-10	3.99303e-11	5.07603e-05
996	1.87541e-09	1.18022e-09	9.83517e-11	0.000125027
997	3.98995e-09	2.51094e-09	2.09245e-10	0.000265997
998	2.07266e-09	1.30436e-09	1.08696e-10	0.000138177
999	2.53847e-09	1.5975e-09	1.33125e-10	0.000169231
1000	4.6266e-09	2.91159e-09	2.42632e-10	0.00030844
1001	1.28576e-09	8.0915e-10	6.74292e-11	8.57176e-05
1002	4.22769e-09	2.66055e-09	2.21713e-10	0.000281846
1003	3.41371e-09	2.1483e-09	1.79025e-10	0.000227581
1004	2.81006e-09	1.76841e-09	1.47368e-10	0.000187337
1005	1.86397e-09	1.17302e-09	9.77519e-11	0.000124264
1006	1.38279e-09	8.70212e-10	7.25176e-11	9.21861e-05
1007	1.80763e-09	1.13757e-09	9.47972e-11	0.000120508
1008	2.77412e-09	1.7458e-09	1.45483e-10	0.000184941
1009	1.41013e-09	8.87417e-10	7.39514e-11	9.40088e-05
1010	2.26758e-09	1.42703e-09	1.18919e-10	0.000151172
1011	9.91372e-10	6.23885e-10	5.19904e-11	6.60915e-05
1012	5.1586e-09	3.24638e-09	2.70532e-10	0.000343907
1013	2.23548e-09	1.40682e-09	1.17235e-10	0.000149032
1014	2.26558e-09	1.42576e-09	1.18814e-10	0.000151039
1015	1.96448e-09	1.23628e-09	1.03023e-10	0.000130965
1016	2.72551e-09	1.7152e-09	1.42933e-10	0.0001817
1017	2.67074e-09	1.68073e-09	1.40061e-10	0.000178049
1018	3.31019e-09	2.08315e-09	1.73596e-10	0.000220679
1019	2.00989e-09	1.26485e-09	1.05404e-10	0.000133993
1020	2.78463e-09	1.75241e-09	1.46034e-10	0.000185642
1021	1.0427e-09	6.56187e-10	5.46822e-11	6.95133e-05
1022	2.00877e-09	1.26415e-09	1.05346e-10	0.000133918
1023	3.65894e-09	2.30262e-09	1.91885e-10	0.000243929
1024	2.66612e-09	1.67783e-09	1.39819e-10	0.000177741
1025	1.99533e-09	1.25569e-09	1.04641e-10	0.000133022
1026	2.80709e-09	1.76654e-09	1.47212e-10	0.000187139
1027	1.83579e-09	1.15529e-09	9.62739e-11	0.000122386
1028	4.10504e-09	2.58336e-09	2.1528e-10	0.000273669
1029	2.20722e-09	1.38904e-09	1.15753e-10	0.000147148
1030	2.63178e-09	1.65622e-09	1.38018e-10	0.000175452
1031	4.09845e-09	2.57921e-09	2.14935e-10	0.00027323
1032	3.25696e-09	2.04965e-09	1.70804e-10	0.000217131
1033	1.85307e-09	1.16616e-09	9.71803e-11	0.000123538
1034	2.51336e-09	1.58169e-09	1.31808e-10	0.000167557
1035	1.39494e-09	8.77858e-10	7.31549e-11	9.29962e-05
1036	2.63109e-09	1.65579e-09	1.37982e-10	0.000175406
1037	3.02668e-09	1.90474e-09	1.58728e-10	0.000201779
1038	2.65172e-09	1.66877e-09	1.39064e-10	0.000176781
1039	3.50446e-09	2.20541e-09	1.83784e-10	0.000233631
1040	3.52183e-09	2.21634e-09	1.84695e-10	0.000234788
1041	1.12048e-09	7.05137e-10	5.87614e-11	7.46988e-05
1042	5.09043e-09	3.20349e-09	2.66957e-10	0.000339362
1043	1.13899e-09	7.16784e-10	5.9732e-11	7.59327e-05
1044	3.53135e-09	2.22233e-09	1.85194e-10	0.000235423
1045	2.30706e-09	1.45187e-09	1.20989e-10	0.000153804
1046	2.72916e-09	1.7175e-09	1.43125e-10	0.000181944
1047	1.01716e-09	6.40113e-10	5.33427e-11	6.78105e-05
1048	2.37748e-09	1.49618e-09	1.24682e-10	0.000158499
1049	1.47921e-09	9.30887e-10	7.75739e-11	9.86137e-05
1050	6.34336e-09	3.99197e-09	3.32664e-10	0.000422891
1051	2.58774e-09	1.6285e-09	1.35708e-10	0.000172516
1052	2.22373e-09	1.39943e-09	1.16619e-10	0.000148249
1053	1.8594e-09	1.17015e-09	9.75123e-11	0.00012396
1054	5.91664e-09	3.72343e-09	3.10286e-10	0.000394443
1055	1.68312e-09	1.05921e-09	8.82676e-11	0.000112208
1056	3.76701e-09	2.37064e-09	1.97553e-10	0.000251134
1057	3.75001e-09	2.35994e-09	1.96662e-10	0.000250001
1058	2.71248e-09	1.70701e-09	1.42251e-10	0.000180832
1059	3.51419e-09	2.21154e-09	1.84295e-10	0.00023428
1060	2.09212e-09	1.31661e-09	1.09717e-10	0.000139475
1061	1.31475e-09	8.27389e-10	6.89491e-11	8.76497e-05
1062	1.47937e-09	9.30992e-10	7.75827e-11	9.86249e-05
1063	3.22157e-09	2.02738e-09	1.68948e-10	0.000214771
1064	7.80335e-10	4.91077e-10	4.09231e-11	5.20223e-05
1065	2.19472e-09	1.38117e-09	1.15097e-10	0.000146315
1066	2.68329e-09	1.68864e-09	1.4072e-10	0.000178886
1067	1.58905e-09	1.00001e-09	8.33343e-11	0.000105936
1068	2.34295e-09	1.47446e-09	1.22871e-10	0.000156197
1069	1.7829e-09	1.122e-09	9.35004e-11	0.00011886
1070	3.74516e-09	2.35689e-09	1.96407e-10	0.000249678
1071	9.37152e-10	5.89764e-10	4.9147e-11	6.24768e-05
1072	2.93605e-09	1.8477e-09	1.53975e-10	0.000195737
1073	1.3949e-09	8.77832e-10	7.31527e-11	9.29934e-05
1074	7.71189e-10	4.85321e-10	4.04434e-11	5.14126e-05
1075	3.1581e-09	1.98744e-09	1.6562e-10	0.00021054
1076	3.24269e-09	2.04068e-09	1.70056e-10	0.00021618
1077	1.98218e-09	1.24742e-09	1.03951e-10	0.000132145
1078	2.39172e-09	1.50515e-09	1.25429e-10	0.000159448
1079	3.26777e-09	2.05646e-09	1.71372e-10	0.000217852
1080	1.2397e-09	7.8016e-10	6.50133e-11	8.26465e-05
1081	2.31996e-09	1.45998e-09	1.21665e-10	0.000154664
1082	1.83296e-09	1.15351e-09	9.61257e-11	0.000122197
1083	4.45611e-09	2.8043e-09	2.33692e-10	0.000297074
1084	3.02619e-09	1.90443e-09	1.58702e-10	0.000201746
1085	9.67243e-10	6.087e-10	5.0725e-11	6.44829e-05
1086	2.311e-09	1.45435e-09	1.21196e-10	0.000154067
1087	1.39059e-09	8.75117e-10	7.29264e-11	9.27057e-05
1088	2.98615e-09	1.87923e-09	1.56602e-10	0.000199076
1089	1.43879e-09	9.05451e-10	7.54543e-11	9.59192e-05
1090	4.33599e-09	2.7287e-09	2.27392e-10	0.000289066
1091	2.07451e-09	1.30552e-09	1.08794e-10	0.000138301
1092	2.7655e-09	1.74037e-09	1.45031e-10	0.000184367
1093	2.83552e-09	1.78443e-09	1.48703e-10	0.000189034
1094	2.08309e-09	1.31092e-09	1.09244e-10	0.000138873
1095	7.74709e-10	4.87536e-10	4.0628e-11	5.16472e-05
1096	2.29028e-09	1.44131e-09	1.20109e-10	0.000152686
1097	1.36734e-09	8.60485e-10	7.1707e-11	9.11557e-05
1098	5.76142e-09	3.62575e-09	3.02146e-10	0.000384095
1099	2.33097e-09	1.46691e-09	1.22243e-10	0.000155398
1100	1.76128e-09	1.1084e-09	9.23666e-11	0.000117419
1101	3.38346e-09	2.12926e-09	1.77438e-10	0.000225564
1102	3.00419e-09	1.89058e-09	1.57548e-10	0.000200279
1103	1.90994e-09	1.20196e-09	1.00163e-10	0.000127329
1104	2.35609e-09	1.48272e-09	1.2356e-10	0.000157073
1105	2.44269e-09	1.53722e-09	1.28102e-10	0.000162846
1106	2.03969e-09	1.28361e-09	1.06967e-10	0.000135979
1107	2.61031e-09	1.64271e-09	1.36892e-10	0.00017402
1108	1.64819e-09	1.03723e-09	8.64359e-11	0.000109879
1109	1.72886e-09	1.088e-09	9.06663e-11	0.000115257
1110	3.37777e-09	2.12568e-09	1.7714e-10	0.000225185
1111	1.21014e-09	7.61559e-10	6.34633e-11	8.0676e-05
1112	3.07545e-09	1.93542e-09	1.61285e-10	0.00020503
1113	2.1647e-09	1.36228e-09	1.13523e-10	0.000144313
1114	2.67794e-09	1.68527e-09	1.40439e-10	0.000178529
1115	3.30465e-09	2.07967e-09	1.73305e-10	0.00022031
1116	3.30711e-09	2.08122e-09	1.73435e-10	0.000220474
1117	9.89219e-10	6.2253e-10	5.18775e-11	6.59479e-05
1118	1.04431e-08	6.57201e-09	5.47667e-10	0.000696207
1119	4.72051e-09	2.97069e-09	2.47557e-10	0.000314701
1120	2.66544e-09	1.6774e-09	1.39784e-10	0.000177696
1121	2.1158e-09	1.3315e-09	1.10959e-10	0.000141053
1122	2.06227e-09	1.29782e-09	1.08151e-10	0.000137484
1123	1.56066e-09	9.82148e-10	8.18456e-11	0.000104044
1124	1.98558e-09	1.24956e-09	1.0413e-10	0.000132372
1125	2.72731e-09	1.71634e-09	1.43028e-10	0.000181821
1126	1.5876e-09	9.99103e-10	8.32586e-11	0.00010584
1127	4.29181e-09	2.7009e-09	2.25075e-10	0.000286121
1128	2.43178e-09	1.53036e-09	1.2753e-10	0.000162119
1129	3.31635e-09	2.08703e-09	1.73919e-10	0.00022109
1130	4.48515e-09	2.82257e-09	2.35215e-10	0.00029901
1131	2.44759e-09	1.54031e-09	1.28359e-10	0.000163173
1132	1.76157e-09	1.10859e-09	9.23821e-11	0.000117438
1133	1.49503e-09	9.40845e-10	7.84038e-11	9.96687e-05
1134	1.47905e-09	9.30789e-10	7.75657e-11	9.86034e-05
1135	1.28819e-09	8.10676e-10	6.75563e-11	8.58792e-05
1136	5.25823e-09	3.30908e-09	2.75757e-10	0.000350548
1137	1.33416e-09	8.39606e-10	6.99671e-11	8.89438e-05
1138	2.61992e-09	1.64875e-09	1.37396e-10	0.000174661
1139	3.25401e-09	2.0478e-09	1.7065e-10	0.000216934
1140	4.37274e-09	2.75183e-09	2.29319e-10	0.000291516
1141	3.37522e-09	2.12408e-09	1.77007e-10	0.000225015
1142	1.99251e-09	1.25392e-09	1.04493e-10	0.000132834
1143	3.15012e-09	1.98242e-09	1.65201e-10	0.000210008
1144	3.75238e-09	2.36143e-09	1.96786e-10	0.000250159
1145	2.75509e-09	1.73382e-09	1.44485e-10	0.000183672
1146	2.48657e-09	1.56484e-09	1.30403e-10	0.000165771
1147	1.51926e-09	9.56092e-10	7.96743e-11	0.000101284
1148	7.55869e-09	4.7568e-09	3.964e-10	0.000503913
1149	1.86876e-09	1.17604e-09	9.80031e-11	0.000124584
1150	3.03781e-09	1.91174e-09	1.59312e-10	0.000202521
1151	2.85697e-09	1.79793e-09	1.49828e-10	0.000190464
1152	1.29479e-09	8.14828e-10	6.79023e-11	8.6319e-05
1153	2.81832e-09	1.77361e-09	1.47801e-10	0.000187888
1154	1.76936e-09	1.11349e-09	9.27905e-11	0.000117958
1155	1.21038e-09	7.6171e-10	6.34758e-11	8.0692e-05
1156	2.65132e-09	1.66851e-09	1.39043e-10	0.000176754
1157	4.11495e-09	2.5896e-09	2.158e-10	0.00027433
1158	2.11555e-09	1.33135e-09	1.10946e-10	0.000141037
1159	2.09621e-09	1.31917e-09	1.09931e-10	0.000139747
1160	6.43852e-09	4.05186e-09	3.37655e-10	0.000429235
1161	1.46535e-09	9.22164e-10	7.6847e-11	9.76897e-05
1162	1.32238e-09	8.32192e-10	6.93494e-11	8.81585e-05
1163	3.44767e-09	2.16967e-09	1.80806e-10	0.000229845
1164	2.67249e-09	1.68184e-09	1.40153e-10	0.000178166
1165	2.17508e-09	1.36881e-09	1.14068e-10	0.000145005
1166	2.44091e-09	1.5361e-09	1.28008e-10	0.000162727
1167	1.3972e-09	8.79281e-10	7.32734e-11	9.31468e-05
1168	3.36311e-09	2.11646e-09	1.76371e-10	0.000224207
1169	2.87345e-09	1.80831e-09	1.50692e-10	0.000191564
1170	1.51003e-09	9.50282e-10	7.91901e-11	0.000100668
1171	6.5433e-09	4.1178e-09	3.4315e-10	0.00043622
1172	4.11498e-09	2.58962e-09	2.15802e-10	0.000274332
1173	2.84645e-09	1.79131e-09	1.49276e-10	0.000189763
1174	1.45592e-09	9.1623e-10	7.63525e-11	9.70611e-05
1175	1.73916e-09	1.09448e-09	9.12065e-11	0.000115944
1176	3.22106e-09	2.02706e-09	1.68922e-10	0.000214738
1177	2.31849e-09	1.45906e-09	1.21588e-10	0.000154566
1178	1.7672e-09	1.11212e-09	9.26769e-11	0.000117813
1179	8.35404e-10	5.25732e-10	4.3811e-11	5.56936e-05
1180	1.46259e-09	9.20428e-10	7.67024e-11	9.75058e-05
1181	5.43296e-09	3.41904e-09	2.8492e-10	0.000362197
1182	2.81809e-09	1.77347e-09	1.47789e-10	0.000187873
1183	1.9858e-09	1.2497e-09	1.04141e-10	0.000132387
1184	2.53925e-09	1.59799e-09	1.33166e-10	0.000169283
1185	2.54435e-09	1.6012e-09	1.33433e-10	0.000169624
1186	4.54695e-09	2.86146e-09	2.38455e-10	0.00030313
1187	2.86012e-09	1.79991e-09	1.49993e-10	0.000190674
1188	6.27312e-09	3.94777e-09	3.28981e-10	0.000418208
1189	2.65875e-09	1.67319e-09	1.39433e-10	0.00017725
1190	1.79366e-09	1.12878e-09	9.40647e-11	0.000119577
1191	1.60027e-09	1.00708e-09	8.39229e-11	0.000106685
1192	3.28082e-09	2.06467e-09	1.72056e-10	0.000218721
1193	2.70756e-09	1.70391e-09	1.41992e-10	0.000180504
1194	2.66451e-09	1.67681e-09	1.39735e-10	0.000177634
1195	2.4329e-09	1.53106e-09	1.27589e-10	0.000162194
1196	2.29377e-09	1.4435e-09	1.20292e-10	0.000152918
1197	1.67357e-09	1.0532e-09	8.77668e-11	0.000111571
1198	2.37416e-09	1.4941e-09	1.24508e-10	0.000158277
1199	1.02078e-08	6.42395e-09	5.35329e-10	0.000680523
1200	1.27871e-09	8.04708e-10	6.7059e-11	8.5247e-05
1201	9.24402e-09	5.8174e-09	4.84784e-10	0.000616268
1202	3.93978e-09	2.47936e-09	2.06614e-10	0.000262652
1203	3.39381e-09	2.13578e-09	1.77981e-10	0.000226254
1204	3.0905e-09	1.9449e-09	1.62075e-10	0.000206033
1205	3.97227e-09	2.49981e-09	2.08317e-10	0.000264818
1206	3.01389e-09	1.89668e-09	1.58057e-10	0.000200926
1207	2.70631e-09	1.70312e-09	1.41927e-10	0.000180421
1208	5.4692e-09	3.44185e-09	2.86821e-10	0.000364614
1209	2.2683e-09	1.42747e-09	1.18956e-10	0.00015122
1210	1.56818e-09	9.86877e-10	8.22398e-11	0.000104545
1211	1.52204e-09	9.57843e-10	7.98203e-11	0.000101469
1212	1.99012e-09	1.25241e-09	1.04368e-10	0.000132675
1213	1.83729e-09	1.15623e-09	9.63528e-11	0.000122486
1214	5.27794e-09	3.32149e-09	2.7679e-10	0.000351863
1215	4.13862e-09	2.60449e-09	2.17041e-10	0.000275908
1216	1.27046e-09	7.99521e-10	6.66268e-11	8.46975e-05
1217	3.76819e-09	2.37138e-09	1.97615e-10	0.000251213
1218	1.36388e-09	8.58308e-10	7.15257e-11	9.09251e-05
1219	2.21131e-09	1.39161e-09	1.15968e-10	0.000147421
1220	6.32044e-09	3.97755e-09	3.31462e-10	0.000421363
1221	5.29909e-09	3.3348e-09	2.779e-10	0.000353273
1222	3.11112e-09	1.95787e-09	1.63156e-10	0.000207408
1223	4.82307e-09	3.03523e-09	2.52936e-10	0.000321538
1224	3.50917e-09	2.20838e-09	1.84031e-10	0.000233945
1225	1.92355e-09	1.21052e-09	1.00877e-10	0.000128237
1226	2.97151e-09	1.87002e-09	1.55835e-10	0.000198101
1227	1.84632e-09	1.16192e-09	9.68263e-11	0.000123088
1228	1.21935e-09	7.67357e-10	6.39464e-11	8.12902e-05
1229	9.83469e-10	6.18912e-10	5.1576e-11	6.55646e-05
1230	3.4198e-09	2.15213e-09	1.79345e-10	0.000227987
1231	2.19741e-09	1.38286e-09	1.15238e-10	0.000146494
1232	1.16833e-09	7.35249e-10	6.12707e-11	7.78888e-05
1233	2.89048e-09	1.81903e-09	1.51585e-10	0.000192699
1234	2.09143e-09	1.31617e-09	1.09681e-10	0.000139429
1235	2.95358e-09	1.85873e-09	1.54894e-10	0.000196905
1236	3.15306e-09	1.98427e-09	1.65356e-10	0.000210204
1237	2.84842e-09	1.79255e-09	1.4938e-10	0.000189895
1238	4.65082e-09	2.92683e-09	2.43902e-10	0.000310055
1239	3.28637e-09	2.06816e-09	1.72347e-10	0.000219091
1240	6.46268e-09	4.06706e-09	3.38922e-10	0.000430845
1241	2.45683e-09	1.54612e-09	1.28843e-10	0.000163788
1242	2.33494e-09	1.46941e-09	1.22451e-10	0.000155662
1243	3.32858e-09	2.09473e-09	1.74561e-10	0.000221906
1244	3.08914e-09	1.94404e-09	1.62004e-10	0.000205943
1245	3.85373e-09	2.42521e-09	2.02101e-10	0.000256915
1246	7.65984e-10	4.82045e-10	4.01704e-11	5.10656e-05
1247	3.16793e-09	1.99363e-09	1.66136e-10	0.000211196
1248	1.72354e-09	1.08465e-09	9.03873e-11	0.000114902
1249	1.8132e-09	1.14107e-09	9.50895e-11	0.00012088
1250	9.91283e-10	6.23829e-10	5.19858e-11	6.60855e-05
1251	8.16779e-09	5.14011e-09	4.28343e-10	0.000544519
1252	2.38404e-09	1.50031e-09	1.25026e-10	0.000158936
1253	3.38882e-09	2.13264e-09	1.7772e-10	0.000225922
1254	3.00442e-09	1.89073e-09	1.57561e-10	0.000200295
1255	8.06902e-09	5.07795e-09	4.23163e-10	0.000537934
1256	2.00487e-09	1.2617e-09	1.05141e-10	0.000133658
1257	2.35213e-09	1.48023e-09	1.23353e-10	0.000156809
1258	3.19543e-09	2.01093e-09	1.67578e-10	0.000213029
1259	2.10963e-09	1.32762e-09	1.10635e-10	0.000140642
1260	2.47863e-09	1.55984e-09	1.29986e-10	0.000165242
1261	3.39348e-09	2.13557e-09	1.77964e-10	0.000226232
1262	3.95887e-09	2.49138e-09	2.07615e-10	0.000263925
1263	2.6932e-09	1.69487e-09	1.41239e-10	0.000179547
1264	1.4641e-09	9.21383e-10	7.67819e-11	9.76069e-05
1265	2.85234e-09	1.79502e-09	1.49585e-10	0.000190156
1266	2.40729e-09	1.51494e-09	1.26245e-10	0.000160486
1267	1.60868e-09	1.01237e-09	8.43641e-11	0.000107246
1268	2.39566e-09	1.50763e-09	1.25636e-10	0.000159711
1269	1.37011e-09	8.62231e-10	7.18525e-11	9.13406e-05
1270	1.93139e-09	1.21545e-09	1.01288e-10	0.000128759
1271	2.34276e-09	1.47434e-09	1.22861e-10	0.000156184
1272	2.86575e-09	1.80346e-09	1.50288e-10	0.00019105
1273	3.93526e-09	2.47652e-09	2.06377e-10	0.000262351
1274	1.43956e-09	9.05934e-10	7.54945e-11	9.59704e-05
1275	3.31249e-09	2.0846e-09	1.73717e-10	0.000220833
1276	3.92766e-09	2.47174e-09	2.05978e-10	0.000261844
1277	3.4783e-09	2.18894e-09	1.82412e-10	0.000231886
1278	2.32974e-09	1.46614e-09	1.22179e-10	0.000155316
1279	1.78321e-09	1.1222e-09	9.35166e-11	0.00011888
1280	3.87631e-09	2.43942e-09	2.03285e-10	0.000258421
1281	1.39943e-09	8.8068e-10	7.339e-11	9.32951e-05
1282	6.16182e-10	3.87772e-10	3.23144e-11	4.10788e-05
1283	3.2867e-09	2.06837e-09	1.72364e-10	0.000219113
1284	4.12459e-09	2.59567e-09	2.16306e-10	0.000274973
1285	1.75762e-09	1.1061e-09	9.21749e-11	0.000117175
1286	2.42639e-09	1.52697e-09	1.27247e-10	0.00016176
1287	1.91342e-09	1.20415e-09	1.00346e-10	0.000127562
1288	3.97349e-09	2.50058e-09	2.08381e-10	0.000264899
1289	2.96407e-09	1.86534e-09	1.55445e-10	0.000197605
1290	7.5613e-10	4.75844e-10	3.96537e-11	5.04086e-05
1291	3.31382e-09	2.08544e-09	1.73787e-10	0.000220922
1292	2.63939e-09	1.66101e-09	1.38417e-10	0.000175959
1293	2.91123e-09	1.83208e-09	1.52673e-10	0.000194082
1294	3.18328e-09	2.00329e-09	1.66941e-10	0.000212219
1295	1.27846e-09	8.04557e-10	6.70464e-11	8.52309e-05
1296	3.94936e-09	2.48539e-09	2.07116e-10	0.00026329
1297	2.61694e-09	1.64688e-09	1.3724e-10	0.000174463
1298	4.99199e-09	3.14153e-09	2.61794e-10	0.000332799
1299	1.83079e-09	1.15214e-09	9.6012e-11	0.000122053
1300	2.10802e-09	1.32661e-09	1.10551e-10	0.000140534
1301	2.54769e-09	1.6033e-09	1.33608e-10	0.000169846
1302	5.47393e-09	3.44483e-09	2.87069e-10	0.000364929
1303	1.81812e-09	1.14417e-09	9.53474e-11	0.000121208
1304	2.95472e-09	1.85945e-09	1.54954e-10	0.000196982
1305	2.13635e-09	1.34444e-09	1.12036e-10	0.000142423
1306	4.90122e-09	3.08441e-09	2.57035e-10	0.000326748
1307	1.91405e-09	1.20454e-09	1.00378e-10	0.000127603
1308	1.45361e-09	9.14777e-10	7.62314e-11	9.69071e-05
1309	1.41903e-08	8.9302e-09	7.44183e-10	0.000946023
1310	4.40321e-09	2.77101e-09	2.30917e-10	0.000293547
1311	2.8844e-09	1.8152e-09	1.51266e-10	0.000192293
1312	5.45768e-09	3.4346e-09	2.86217e-10	0.000363845
1313	2.88574e-09	1.81604e-09	1.51337e-10	0.000192383
1314	2.90303e-09	1.82692e-09	1.52243e-10	0.000193535
1315	3.9939e-09	2.51342e-09	2.09452e-10	0.00026626
1316	6.62237e-10	4.16756e-10	3.47296e-11	4.41491e-05
1317	2.25111e-09	1.41666e-09	1.18055e-10	0.000150074
1318	3.45239e-09	2.17264e-09	1.81054e-10	0.00023016
1319	1.44239e-09	9.07716e-10	7.5643e-11	9.61592e-05
1320	3.28604e-09	2.06795e-09	1.72329e-10	0.000219069
1321	2.15496e-09	1.35615e-09	1.13012e-10	0.000143664
1322	3.04802e-09	1.91817e-09	1.59847e-10	0.000203201
1323	1.72002e-09	1.08243e-09	9.02026e-11	0.000114668
1324	3.18763e-09	2.00602e-09	1.67168e-10	0.000212508
1325	2.3876e-09	1.50255e-09	1.25213e-10	0.000159173
1326	2.65099e-09	1.66831e-09	1.39026e-10	0.000176733
1327	1.58078e-09	9.94809e-10	8.29007e-11	0.000105385
1328	2.01648e-09	1.269e-09	1.0575e-10	0.000134432
1329	1.71223e-09	1.07753e-09	8.97942e-11	0.000114148
1330	1.65859e-09	1.04378e-09	8.69814e-11	0.000110573
1331	2.43263e-09	1.53089e-09	1.27574e-10	0.000162175
1332	2.5103e-09	1.57977e-09	1.31647e-10	0.000167353
1333	1.57248e-09	9.89583e-10	8.24653e-11	0.000104832
1334	9.88286e-10	6.21944e-10	5.18286e-11	6.58858e-05
1335	2.50457e-09	1.57617e-09	1.31347e-10	0.000166972
1336	2.75965e-09	1.73669e-09	1.44724e-10	0.000183977
1337	2.39557e-09	1.50757e-09	1.25631e-10	0.000159705
1338	3.97017e-09	2.49849e-09	2.08207e-10	0.000264678
1339	2.34297e-09	1.47447e-09	1.22872e-10	0.000156198
1340	3.71998e-09	2.34104e-09	1.95087e-10	0.000247999
1341	1.94711e-09	1.22535e-09	1.02112e-10	0.000129807
1342	3.97197e-09	2.49962e-09	2.08302e-10	0.000264798
1343	1.46868e-09	9.24263e-10	7.70219e-11	9.7912e-05
1344	3.36138e-09	2.11537e-09	1.76281e-10	0.000224092
1345	3.60661e-09	2.2697e-09	1.89141e-10	0.000240441
1346	3.33687e-09	2.09995e-09	1.74995e-10	0.000222458
1347	2.40242e-09	1.51188e-09	1.2599e-10	0.000160162
1348	2.30644e-09	1.45148e-09	1.20956e-10	0.000153763
1349	1.204e-09	7.57698e-10	6.31415e-11	8.0267e-05
1350	7.52703e-09	4.73688e-09	3.9474e-10	0.000501802
1351	3.25738e-09	2.04992e-09	1.70826e-10	0.000217158
1352	2.1812e-09	1.37266e-09	1.14388e-10	0.000145413
1353	1.85581e-09	1.16789e-09	9.7324e-11	0.000123721
1354	2.22485e-09	1.40013e-09	1.16678e-10	0.000148324
1355	3.16006e-09	1.98867e-09	1.65723e-10	0.000210671
1356	2.34564e-09	1.47615e-09	1.23012e-10	0.000156376
1357	2.04993e-09	1.29005e-09	1.07504e-10	0.000136662
1358	1.9969e-09	1.25668e-09	1.04723e-10	0.000133126
1359	1.7229e-09	1.08424e-09	9.03537e-11	0.00011486
1360	9.47205e-10	5.9609e-10	4.96742e-11	6.3147e-05
1361	1.69134e-09	1.06439e-09	8.8699e-11	0.000112756
1362	4.10545e-09	2.58362e-09	2.15302e-10	0.000273697
1363	2.5952e-09	1.6332e-09	1.361e-10	0.000173013
1364	1.75972e-09	1.10742e-09	9.2285e-11	0.000117315
1365	3.3515e-09	2.10915e-09	1.75763e-10	0.000223434
1366	7.21994e-09	4.54362e-09	3.78635e-10	0.000481329
1367	1.57406e-09	9.90579e-10	8.25483e-11	0.000104937
1368	1.78372e-09	1.12252e-09	9.35437e-11	0.000118915
1369	1.73714e-09	1.09321e-09	9.11007e-11	0.000115809
1370	3.73712e-09	2.35182e-09	1.95985e-10	0.000249141
1371	4.18297e-09	2.63241e-09	2.19367e-10	0.000278865
1372	1.49278e-09	9.39428e-10	7.82857e-11	9.95186e-05
1373	2.10055e-09	1.32191e-09	1.10159e-10	0.000140036
1374	4.6203e-09	2.90762e-09	2.42302e-10	0.00030802
1375	3.55103e-09	2.23472e-09	1.86227e-10	0.000236736
1376	2.9862e-09	1.87926e-09	1.56605e-10	0.00019908
1377	7.51746e-10	4.73085e-10	3.94237e-11	5.01164e-05
1378	3.22982e-09	2.03257e-09	1.69381e-10	0.000215321
1379	6.99178e-09	4.40003e-09	3.6667e-10	0.000466119
1380	1.89407e-09	1.19197e-09	9.93305e-11	0.000126271
1381	8.66802e-10	5.45492e-10	4.54576e-11	5.77868e-05
1382	1.07489e-09	6.76444e-10	5.63703e-11	7.16593e-05
1383	1.00486e-09	6.32376e-10	5.2698e-11	6.69909e-05
1384	1.83582e-09	1.15531e-09	9.62756e-11	0.000122388
1385	1.48169e-09	9.32451e-10	7.77043e-11	9.87795e-05
1386	1.21057e-09	7.61827e-10	6.34856e-11	8.07044e-05
1387	4.52435e-09	2.84724e-09	2.3727e-10	0.000301623
1388	2.0361e-09	1.28135e-09	1.06779e-10	0.00013574
1389	3.14008e-09	1.9761e-09	1.64675e-10	0.000209339
1390	1.91206e-09	1.20329e-09	1.00274e-10	0.000127471
1391	2.68508e-09	1.68976e-09	1.40813e-10	0.000179005
1392	1.66364e-09	1.04696e-09	8.72464e-11	0.00011091
1393	1.28821e-09	8.10693e-10	6.75578e-11	8.5881e-05
1394	1.05697e-09	6.65169e-10	5.54307e-11	7.04648e-05
1395	3.48163e-09	2.19104e-09	1.82587e-10	0.000232109
1396	1.57566e-09	9.91587e-10	8.26322e-11	0.000105044
1397	2.34967e-09	1.47868e-09	1.23224e-10	0.000156645
1398	2.12369e-09	1.33647e-09	1.11372e-10	0.000141579
1399	3.61453e-09	2.27468e-09	1.89557e-10	0.000240969
1400	5.05002e-09	3.17806e-09	2.64838e-10	0.000336668
1401	2.24737e-09	1.41431e-09	1.17859e-10	0.000149825
1402	1.56737e-09	9.86371e-10	8.21976e-11	0.000104491
1403	1.77626e-09	1.11783e-09	9.31522e-11	0.000118417
1404	3.22637e-09	2.0304e-09	1.692e-10	0.000215091
1405	4.81909e-09	3.03273e-09	2.52727e-10	0.000321273
1406	1.30502e-09	8.21269e-10	6.8439e-11	8.70013e-05
1407	2.57459e-09	1.62023e-09	1.35019e-10	0.000171639
1408	2.29226e-09	1.44255e-09	1.20213e-10	0.000152817
1409	3.22546e-09	2.02983e-09	1.69153e-10	0.000215031
1410	1.12652e-09	7.08936e-10	5.9078e-11	7.51013e-05
1411	3.02201e-09	1.9018e-09	1.58483e-10	0.000201468
1412	2.32463e-09	1.46293e-09	1.21911e-10	0.000154976
1413	1.93944e-09	1.22052e-09	1.0171e-10	0.000129296
1414	2.15911e-09	1.35876e-09	1.1323e-10	0.000143941
1415	2.40596e-09	1.51411e-09	1.26176e-10	0.000160398
1416	3.93075e-09	2.47368e-09	2.0614e-10	0.00026205
1417	3.67275e-09	2.31132e-09	1.9261e-10	0.00024485
1418	5.81326e-09	3.65837e-09	3.04864e-10	0.000387551
1419	1.66163e-09	1.04569e-09	8.71407e-11	0.000110775
1420	9.00809e-09	5.66892e-09	4.7241e-10	0.000600539
1421	3.30882e-09	2.08229e-09	1.73524e-10	0.000220588
1422	1.87964e-09	1.18289e-09	9.85738e-11	0.000125309
1423	4.73384e-09	2.97908e-09	2.48257e-10	0.00031559
1424	2.50683e-09	1.57759e-09	1.31466e-10	0.000167122
1425	3.05896e-09	1.92505e-09	1.60421e-10	0.000203931
1426	1.55114e-09	9.76156e-10	8.13463e-11	0.000103409
1427	3.56577e-09	2.24399e-09	1.86999e-10	0.000237718
1428	2.18212e-09	1.37324e-09	1.14437e-10	0.000145475
1429	3.77812e-09	2.37763e-09	1.98136e-10	0.000251875
1430	9.70502e-10	6.10751e-10	5.08959e-11	6.47001e-05
1431	1.88218e-09	1.18448e-09	9.87069e-11	0.000125479
1432	3.3847e-09	2.13004e-09	1.77504e-10	0.000225647
1433	4.07732e-09	2.56592e-09	2.13826e-10	0.000271821
1434	1.7286e-09	1.08783e-09	9.06527e-11	0.00011524
1435	1.2069e-09	7.59523e-10	6.32936e-11	8.04603e-05
1436	2.07968e-09	1.30878e-09	1.09065e-10	0.000138646
1437	2.77433e-09	1.74593e-09	1.45494e-10	0.000184955
1438	2.95146e-09	1.8574e-09	1.54783e-10	0.000196764
1439	1.331e-09	8.37621e-10	6.98018e-11	8.87336e-05
1440	1.98659e-09	1.25019e-09	1.04182e-10	0.000132439
1441	2.95198e-09	1.85773e-09	1.54811e-10	0.000196799
1442	2.36394e-09	1.48767e-09	1.23972e-10	0.000157596
1443	1.98767e-09	1.25087e-09	1.04239e-10	0.000132511
1444	1.27952e-09	8.0522e-10	6.71017e-11	8.53012e-05
1445	4.38184e-09	2.75756e-09	2.29797e-10	0.000292123
1446	1.35024e-09	8.49723e-10	7.08103e-11	9.00157e-05
1447	1.19265e-09	7.50551e-10	6.25459e-11	7.95098e-05
1448	4.05081e-09	2.54924e-09	2.12436e-10	0.000270054
1449	2.56781e-09	1.61596e-09	1.34664e-10	0.000171187
1450	2.11426e-09	1.33053e-09	1.10878e-10	0.00014095
1451	7.01447e-09	4.41431e-09	3.67859e-10	0.000467631
1452	2.0217e-09	1.27229e-09	1.06024e-10	0.00013478
1453	3.10132e-09	1.95171e-09	1.62642e-10	0.000206755
1454	2.87981e-09	1.81231e-09	1.51026e-10	0.000191988
1455	3.08949e-09	1.94426e-09	1.62022e-10	0.000205966
1456	3.0861e-09	1.94213e-09	1.61844e-10	0.00020574
1457	5.5437e-09	3.48873e-09	2.90728e-10	0.00036958
1458	1.15122e-09	7.24483e-10	6.03736e-11	7.67483e-05
1459	1.96217e-09	1.23482e-09	1.02902e-10	0.000130811
1460	1.33449e-09	8.39812e-10	6.99843e-11	8.89657e-05
1461	2.35768e-09	1.48372e-09	1.23644e-10	0.000157179
1462	2.02495e-09	1.27433e-09	1.06194e-10	0.000134997
1463	1.18933e-09	7.48462e-10	6.23718e-11	7.92885e-05
1464	4.37507e-09	2.7533e-09	2.29441e-10	0.000291671
1465	3.08744e-09	1.94297e-09	1.61914e-10	0.000205829
1466	1.69356e-09	1.06579e-09	8.88154e-11	0.000112904
1467	1.4263e-09	8.97591e-10	7.47993e-11	9.50866e-05
1468	5.56868e-09	3.50446e-09	2.92038e-10	0.000371246
1469	3.24961e-09	2.04503e-09	1.70419e-10	0.000216641
1470	4.26179e-09	2.68201e-09	2.23501e-10	0.000284119
1471	1.29829e-09	8.17036e-10	6.80864e-11	8.6553e-05
1472	3.08945e-09	1.94424e-09	1.6202e-10	0.000205963
1473	4.89866e-09	3.0828e-09	2.569e-10	0.000326577
1474	1.9585e-09	1.23251e-09	1.02709e-10	0.000130567
1475	1.40727e-09	8.85615e-10	7.38012e-11	9.38178e-05
1476	2.64572e-09	1.66499e-09	1.38749e-10	0.000176381
1477	2.1379e-09	1.34542e-09	1.12118e-10	0.000142527
1478	4.13721e-09	2.60361e-09	2.16968e-10	0.000275814
1479	3.18174e-09	2.00231e-09	1.6686e-10	0.000212116
1480	2.17006e-09	1.36565e-09	1.13804e-10	0.00014467
1481	2.43822e-09	1.53441e-09	1.27867e-10	0.000162548
1482	3.12921e-09	1.96926e-09	1.64105e-10	0.000208614
1483	2.78571e-09	1.75309e-09	1.46091e-10	0.000185714
1484	2.48666e-09	1.5649e-09	1.30408e-10	0.000165778
1485	3.38673e-09	2.13132e-09	1.7761e-10	0.000225782
1486	3.67099e-09	2.31021e-09	1.92517e-10	0.000244733
1487	2.47315e-09	1.55639e-09	1.29699e-10	0.000164877
1488	2.01075e-09	1.26539e-09	1.05449e-10	0.00013405
1489	3.34165e-09	2.10295e-09	1.75246e-10	0.000222776
1490	2.37204e-09	1.49276e-09	1.24397e-10	0.000158136
1491	3.36633e-09	2.11848e-09	1.7654e-10	0.000224422
1492	1.48871e-09	9.36868e-10	7.80723e-11	9.92473e-05
1493	1.9635e-09	1.23566e-09	1.02972e-10	0.0001309
1494	9.94993e-10	6.26164e-10	5.21804e-11	6.63329e-05
1495	1.23275e-08	7.75786e-09	6.46489e-10	0.000821832
1496	1.1551e-09	7.26923e-10	6.05769e-11	7.70068e-05
1497	2.00754e-09	1.26337e-09	1.05281e-10	0.000133836
1498	8.32047e-10	5.23619e-10	4.3635e-11	5.54698e-05
1499	8.16497e-09	5.13834e-09	4.28195e-10	0.000544331
1500	1.5151e-09	9.53474e-10	7.94561e-11	0.000101007
1501	3.45056e-09	2.17149e-09	1.80958e-10	0.000230038
1502	2.73233e-09	1.7195e-09	1.43291e-10	0.000182155
1503	2.85913e-09	1.79929e-09	1.49941e-10	0.000190609
1504	2.6924e-09	1.69437e-09	1.41197e-10	0.000179493
1505	1.63818e-09	1.03093e-09	8.59111e-11	0.000109212
1506	5.17769e-09	3.2584e-09	2.71533e-10	0.000345179
1507	2.53554e-09	1.59566e-09	1.32971e-10	0.000169036
1508	3.30856e-09	2.08213e-09	1.73511e-10	0.000220571
1509	3.14332e-09	1.97814e-09	1.64845e-10	0.000209555
1510	2.37261e-09	1.49312e-09	1.24427e-10	0.000158174
1511	4.63128e-09	2.91454e-09	2.42878e-10	0.000308752
1512	7.84846e-09	4.93916e-09	4.11596e-10	0.000523231
1513	4.08926e-09	2.57343e-09	2.14453e-10	0.000272618
1514	2.60836e-09	1.64148e-09	1.3679e-10	0.000173891
1515	1.50771e-09	9.48822e-10	7.90685e-11	0.000100514
1516	3.06483e-09	1.92875e-09	1.60729e-10	0.000204322
1517	4.36016e-09	2.74391e-09	2.28659e-10	0.000290677
1518	3.30544e-09	2.08016e-09	1.73347e-10	0.000220363
1519	1.79385e-09	1.12889e-09	9.40746e-11	0.00011959
1520	1.20427e-09	7.57863e-10	6.31553e-11	8.02845e-05
1521	5.73985e-09	3.61217e-09	3.01014e-10	0.000382657
1522	1.87408e-09	1.17938e-09	9.8282e-11	0.000124938
1523	3.53071e-09	2.22193e-09	1.85161e-10	0.00023538
1524	3.58749e-09	2.25766e-09	1.88139e-10	0.000239166
1525	9.12713e-09	5.74384e-09	4.78654e-10	0.000608476
1526	2.0277e-09	1.27606e-09	1.06339e-10	0.00013518
1527	4.15149e-09	2.61259e-09	2.17716e-10	0.000276766
1528	7.18843e-09	4.52379e-09	3.76982e-10	0.000479229
1529	2.88144e-09	1.81333e-09	1.51111e-10	0.000192096
1530	4.02409e-09	2.53242e-09	2.11035e-10	0.000268273
1531	2.68464e-09	1.68949e-09	1.40791e-10	0.000178976
1532	2.52755e-09	1.59063e-09	1.32552e-10	0.000168504
1533	2.69357e-09	1.69511e-09	1.41259e-10	0.000179572
1534	1.29244e-09	8.1335e-10	6.77792e-11	8.61625e-05
1535	3.01981e-09	1.90041e-09	1.58368e-10	0.000201321
1536	1.56403e-09	9.84265e-10	8.2022e-11	0.000104268
1537	2.03119e-09	1.27826e-09	1.06522e-10	0.000135413
1538	9.26831e-10	5.83269e-10	4.86057e-11	6.17887e-05
1539	2.94989e-09	1.85641e-09	1.54701e-10	0.000196659
1540	2.88667e-09	1.81662e-09	1.51385e-10	0.000192444
1541	2.27829e-09	1.43376e-09	1.1948e-10	0.000151886
1542	4.99237e-10	3.14177e-10	2.61815e-11	3.32825e-05
1543	2.74429e-09	1.72702e-09	1.43919e-10	0.000182953
1544	5.67197e-09	3.56946e-09	2.97455e-10	0.000378132
1545	1.78794e-09	1.12518e-09	9.3765e-11	0.000119196
1546	5.66921e-09	3.56772e-09	2.9731e-10	0.000377948
1547	3.40333e-09	2.14177e-09	1.78481e-10	0.000226889
1548	1.7872e-09	1.12471e-09	9.3726e-11	0.000119147
1549	1.43596e-09	9.0367e-10	7.53059e-11	9.57306e-05
1550	2.26811e-09	1.42735e-09	1.18946e-10	0.000151207
1551	5.58001e-09	3.51159e-09	2.92632e-10	0.000372001
1552	4.22404e-09	2.65825e-09	2.21521e-10	0.000281602
1553	1.9573e-09	1.23176e-09	1.02647e-10	0.000130487
1554	2.07215e-09	1.30403e-09	1.08669e-10	0.000138143
1555	2.23518e-09	1.40664e-09	1.1722e-10	0.000149012
1556	1.95531e-09	1.23051e-09	1.02542e-10	0.000130354
1557	2.11943e-09	1.33379e-09	1.11149e-10	0.000141295
1558	2.67488e-09	1.68334e-09	1.40279e-10	0.000178326
1559	3.06237e-09	1.92719e-09	1.60599e-10	0.000204158
1560	1.12886e-09	7.10411e-10	5.92009e-11	7.52576e-05
1561	2.15529e-09	1.35636e-09	1.1303e-10	0.000143686
1562	2.73361e-09	1.7203e-09	1.43358e-10	0.000182241
1563	4.91908e-09	3.09565e-09	2.57971e-10	0.000327939
1564	2.14361e-09	1.34901e-09	1.12417e-10	0.000142908
1565	2.41301e-09	1.51854e-09	1.26545e-10	0.000160867
1566	3.93098e-09	2.47382e-09	2.06152e-10	0.000262065
1567	3.48987e-09	2.19622e-09	1.83019e-10	0.000232658
1568	2.87162e-09	1.80716e-09	1.50596e-10	0.000191442
1569	2.65179e-09	1.66881e-09	1.39068e-10	0.000176786
1570	2.92475e-09	1.84059e-09	1.53382e-10	0.000194983
1571	2.19847e-09	1.38353e-09	1.15294e-10	0.000146565
1572	1.75613e-09	1.10516e-09	9.20966e-11	0.000117075
1573	5.33696e-09	3.35863e-09	2.79886e-10	0.000355798
1574	1.72656e-09	1.08655e-09	9.05458e-11	0.000115104
1575	4.40306e-09	2.77091e-09	2.30909e-10	0.000293537
1576	4.51203e-09	2.83949e-09	2.36624e-10	0.000300802
1577	2.66777e-09	1.67887e-09	1.39906e-10	0.000177851
1578	1.00004e-08	6.29337e-09	5.24448e-10	0.00066669
1579	2.92511e-09	1.84081e-09	1.53401e-10	0.000195007
1580	9.92785e-10	6.24774e-10	5.20645e-11	6.61856e-05
1581	1.89835e-09	1.19466e-09	9.95548e-11	0.000126556
1582	1.66727e-09	1.04924e-09	8.74364e-11	0.000111151
1583	2.96356e-09	1.86501e-09	1.55418e-10	0.00019757
1584	1.32754e-09	8.35441e-10	6.96201e-11	8.85026e-05
1585	5.38028e-09	3.38589e-09	2.82158e-10	0.000358685
1586	5.73007e-09	3.60602e-09	3.00502e-10	0.000382005
1587	4.30613e-09	2.70991e-09	2.25826e-10	0.000287075
1588	3.57147e-09	2.24758e-09	1.87298e-10	0.000238098
1589	4.22682e-09	2.66e-09	2.21667e-10	0.000281788
1590	1.16632e-09	7.33983e-10	6.11652e-11	7.77547e-05
1591	7.43635e-09	4.6798e-09	3.89984e-10	0.000495756
1592	1.93234e-09	1.21605e-09	1.01338e-10	0.000128823
1593	3.57991e-09	2.25289e-09	1.87741e-10	0.000238661
1594	2.9121e-09	1.83263e-09	1.52719e-10	0.00019414
1595	2.27871e-09	1.43403e-09	1.19502e-10	0.000151914
1596	3.13056e-09	1.97011e-09	1.64176e-10	0.000208704
1597	3.3714e-09	2.12167e-09	1.76806e-10	0.00022476
1598	2.93684e-09	1.8482e-09	1.54016e-10	0.000195789
1599	4.21959e-09	2.65545e-09	2.21288e-10	0.000281306
1600	3.43881e-09	2.16409e-09	1.80341e-10	0.000229254
1601	4.10517e-09	2.58345e-09	2.15287e-10	0.000273678
1602	5.04254e-09	3.17335e-09	2.64446e-10	0.000336169
1603	3.0104e-09	1.89449e-09	1.57874e-10	0.000200694
1604	2.04108e-09	1.28448e-09	1.0704e-10	0.000136072
1605	1.96382e-09	1.23586e-09	1.02988e-10	0.000130921
1606	1.27289e-09	8.01052e-10	6.67543e-11	8.48596e-05
1607	2.34046e-09	1.47289e-09	1.22741e-10	0.000156031
1608	1.37272e-09	8.63873e-10	7.19894e-11	9.15147e-05
1609	4.83698e-09	3.04398e-09	2.53665e-10	0.000322465
1610	3.44754e-09	2.16959e-09	1.80799e-10	0.000229836
1611	1.88005e-09	1.18314e-09	9.85954e-11	0.000125337
1612	1.72642e-09	1.08646e-09	9.05385e-11	0.000115095
1613	2.71412e-09	1.70804e-09	1.42336e-10	0.000180941
1614	1.34901e-09	8.48954e-10	7.07461e-11	8.99341e-05
1615	4.4794e-09	2.81896e-09	2.34913e-10	0.000298627
1616	1.00389e-09	6.31765e-10	5.26471e-11	6.69262e-05
1617	2.13071e-09	1.34089e-09	1.11741e-10	0.000142048
1618	2.47061e-09	1.55479e-09	1.29566e-10	0.000164707
1619	2.80517e-09	1.76533e-09	1.47111e-10	0.000187011
1620	2.46654e-09	1.55223e-09	1.29353e-10	0.000164436
1621	3.50426e-09	2.20528e-09	1.83773e-10	0.000233617
1622	1.97308e-09	1.24169e-09	1.03474e-10	0.000131538
1623	1.78622e-09	1.12409e-09	9.36744e-11	0.000119081
1624	2.27205e-09	1.42983e-09	1.19153e-10	0.00015147
1625	2.40862e-09	1.51578e-09	1.26315e-10	0.000160575
1626	1.43755e-09	9.04673e-10	7.53894e-11	9.58368e-05
1627	1.96085e-09	1.23399e-09	1.02833e-10	0.000130723
1628	1.62187e-09	1.02067e-09	8.50556e-11	0.000108125
1629	2.36271e-09	1.48689e-09	1.23908e-10	0.000157514
1630	4.83919e-09	3.04537e-09	2.53781e-10	0.000322613
1631	3.4773e-09	2.18832e-09	1.8236e-10	0.00023182
1632	3.39114e-09	2.13409e-09	1.77841e-10	0.000226076
1633	1.35302e-09	8.51473e-10	7.09561e-11	9.02011e-05
1634	1.67049e-09	1.05127e-09	8.76056e-11	0.000111366
1635	2.15031e-09	1.35322e-09	1.12769e-10	0.000143354
1636	3.49641e-09	2.20034e-09	1.83362e-10	0.000233094
1637	3.46844e-09	2.18274e-09	1.81895e-10	0.00023123
1638	1.94391e-09	1.22333e-09	1.01944e-10	0.000129594
1639	2.21063e-09	1.39118e-09	1.15932e-10	0.000147375
1640	1.92962e-09	1.21434e-09	1.01195e-10	0.000128641
1641	1.10603e-09	6.96043e-10	5.80036e-11	7.37355e-05
1642	3.02272e-09	1.90224e-09	1.5852e-10	0.000201515
1643	2.22556e-09	1.40058e-09	1.16715e-10	0.00014837
1644	9.31158e-10	5.85992e-10	4.88327e-11	6.20772e-05
1645	2.75081e-09	1.73112e-09	1.4426e-10	0.000183387
1646	1.65698e-09	1.04276e-09	8.68966e-11	0.000110465
1647	4.14932e-09	2.61123e-09	2.17602e-10	0.000276621
1648	3.64281e-09	2.29247e-09	1.91039e-10	0.000242854
1649	1.51629e-09	9.54224e-10	7.95187e-11	0.000101086
1650	1.65709e-09	1.04283e-09	8.69028e-11	0.000110473
1651	2.48768e-09	1.56553e-09	1.30461e-10	0.000165845
1652	2.29999e-09	1.44742e-09	1.20618e-10	0.000153333
1653	2.95987e-09	1.86269e-09	1.55224e-10	0.000197325
1654	1.38587e-09	8.7215e-10	7.26792e-11	9.23915e-05
1655	1.66862e-09	1.05009e-09	8.75071e-11	0.000111241
1656	2.63188e-09	1.65628e-09	1.38024e-10	0.000175459
1657	2.96384e-09	1.86519e-09	1.55433e-10	0.000197589
1658	1.61257e-09	1.01481e-09	8.45678e-11	0.000107505
1659	2.26235e-09	1.42373e-09	1.18644e-10	0.000150823
1660	1.58951e-09	1.0003e-09	8.33585e-11	0.000105967
1661	1.84148e-09	1.15887e-09	9.65724e-11	0.000122765
1662	3.07863e-09	1.93743e-09	1.61452e-10	0.000205242
1663	1.75594e-09	1.10504e-09	9.20867e-11	0.000117063
1664	2.32464e-09	1.46293e-09	1.21911e-10	0.000154976
1665	3.75264e-09	2.3616e-09	1.968e-10	0.000250176
1666	3.14764e-09	1.98085e-09	1.65071e-10	0.000209842
1667	4.92853e-09	3.1016e-09	2.58467e-10	0.000328569
1668	2.37631e-09	1.49545e-09	1.24621e-10	0.000158421
1669	1.47772e-09	9.29953e-10	7.74961e-11	9.85148e-05
1670	1.39312e-09	8.76712e-10	7.30593e-11	9.28747e-05
1671	2.51928e-09	1.58542e-09	1.32118e-10	0.000167952
1672	1.83541e-09	1.15505e-09	9.62542e-11	0.000122361
1673	3.81558e-09	2.4012e-09	2.001e-10	0.000254372
1674	2.77824e-09	1.74839e-09	1.45699e-10	0.000185216
1675	1.47904e-09	9.30784e-10	7.75653e-11	9.86028e-05
1676	1.23883e-09	7.79616e-10	6.4968e-11	8.25888e-05
1677	2.44654e-09	1.53964e-09	1.28304e-10	0.000163102
1678	1.65267e-09	1.04005e-09	8.66711e-11	0.000110178
1679	1.78372e-09	1.12252e-09	9.35434e-11	0.000118915
1680	4.19679e-09	2.6411e-09	2.20092e-10	0.000279786
1681	9.51492e-10	5.98788e-10	4.9899e-11	6.34328e-05
1682	5.09185e-09	3.20438e-09	2.67031e-10	0.000339457
1683	1.28382e-09	8.07925e-10	6.73271e-11	8.55877e-05
1684	2.56576e-09	1.61467e-09	1.34556e-10	0.000171051
1685	3.2796e-09	2.0639e-09	1.71992e-10	0.00021864
1686	2.68907e-09	1.69227e-09	1.41023e-10	0.000179271
1687	3.20953e-09	2.0198e-09	1.68317e-10	0.000213968
1688	2.56105e-09	1.61171e-09	1.34309e-10	0.000170737
1689	2.62596e-09	1.65256e-09	1.37713e-10	0.000175064
1690	1.86811e-09	1.17563e-09	9.79693e-11	0.000124541
1691	5.56399e-09	3.5015e-09	2.91792e-10	0.000370932
1692	3.28731e-09	2.06875e-09	1.72396e-10	0.000219154
1693	1.68554e-09	1.06074e-09	8.83946e-11	0.000112369
1694	1.7678e-09	1.1125e-09	9.27084e-11	0.000117853
1695	3.71662e-09	2.33892e-09	1.9491e-10	0.000247774
1696	1.9868e-09	1.25032e-09	1.04194e-10	0.000132453
1697	1.57564e-09	9.91574e-10	8.26312e-11	0.000105043
1698	1.63971e-09	1.03189e-09	8.59911e-11	0.000109314
1699	2.6897e-09	1.69267e-09	1.41055e-10	0.000179313
1700	1.61442e-09	1.01598e-09	8.46651e-11	0.000107628
1701	6.9942e-09	4.40155e-09	3.66796e-10	0.00046628
1702	2.37675e-09	1.49572e-09	1.24644e-10	0.00015845
1703	9.92614e-10	6.24667e-10	5.20556e-11	6.61742e-05
1704	1.29071e-09	8.12265e-10	6.76887e-11	8.60475e-05
1705	3.51247e-09	2.21045e-09	1.84204e-10	0.000234165
1706	3.59397e-09	2.26174e-09	1.88478e-10	0.000239598
1707	1.02685e-09	6.46209e-10	5.38508e-11	6.84564e-05
1708	3.54228e-09	2.22921e-09	1.85768e-10	0.000236152
1709	1.17233e-09	7.37767e-10	6.14806e-11	7.81556e-05
1710	2.60047e-09	1.63651e-09	1.36376e-10	0.000173364
1711	4.25799e-09	2.67962e-09	2.23301e-10	0.000283866
1712	3.6421e-09	2.29203e-09	1.91002e-10	0.000242807
1713	2.17588e-09	1.36931e-09	1.1411e-10	0.000145059
1714	3.40302e-09	2.14157e-09	1.78464e-10	0.000226868
1715	1.43415e-09	9.02533e-10	7.52111e-11	9.56101e-05
1716	3.55279e-09	2.23582e-09	1.86319e-10	0.000236853
1717	1.86294e-09	1.17238e-09	9.76983e-11	0.000124196
1718	1.20971e-09	7.61288e-10	6.34407e-11	8.06473e-05
1719	1.09605e-09	6.89761e-10	5.748e-11	7.307e-05
1720	3.25506e-09	2.04846e-09	1.70705e-10	0.000217004
1721	1.40958e-09	8.87067e-10	7.39222e-11	9.39717e-05
1722	3.41598e-09	2.14973e-09	1.79144e-10	0.000227732
1723	1.2298e-09	7.73929e-10	6.44941e-11	8.19864e-05
1724	1.84136e-09	1.1588e-09	9.65666e-11	0.000122758
1725	1.56676e-09	9.85985e-10	8.21654e-11	0.000104451
1726	3.51232e-09	2.21036e-09	1.84196e-10	0.000234155
1727	1.90926e-09	1.20152e-09	1.00127e-10	0.000127284
1728	2.50636e-09	1.57729e-09	1.31441e-10	0.00016709
1729	4.74166e-09	2.984e-09	2.48666e-10	0.00031611
1730	3.1107e-09	1.95761e-09	1.63134e-10	0.00020738
1731	4.56055e-09	2.87002e-09	2.39169e-10	0.000304037
1732	3.19481e-09	2.01054e-09	1.67545e-10	0.000212987
1733	1.50371e-09	9.46308e-10	7.8859e-11	0.000100247
1734	1.66939e-09	1.05057e-09	8.75477e-11	0.000111293
1735	4.45614e-09	2.80431e-09	2.33693e-10	0.000297076
1736	1.50644e-09	9.48024e-10	7.9002e-11	0.000100429
1737	3.49975e-09	2.20244e-09	1.83537e-10	0.000233317
1738	2.32805e-09	1.46508e-09	1.2209e-10	0.000155203
1739	3.6153e-09	2.27516e-09	1.89597e-10	0.00024102
1740	1.30385e-09	8.20533e-10	6.83778e-11	8.69234e-05
1741	1.96892e-09	1.23907e-09	1.03256e-10	0.000131262
1742	2.37703e-09	1.4959e-09	1.24658e-10	0.000158468
1743	1.53111e-09	9.6355e-10	8.02959e-11	0.000102074
1744	2.11259e-09	1.32948e-09	1.1079e-10	0.000140839
1745	3.51493e-09	2.212e-09	1.84333e-10	0.000234328
1746	2.24425e-09	1.41234e-09	1.17695e-10	0.000149617
1747	3.94243e-09	2.48103e-09	2.06753e-10	0.000262829
1748	7.29027e-09	4.58788e-09	3.82323e-10	0.000486018
1749	2.32035e-09	1.46023e-09	1.21686e-10	0.00015469
1750	1.8553e-09	1.16757e-09	9.72973e-11	0.000123687
1751	2.96048e-09	1.86307e-09	1.55256e-10	0.000197365
1752	3.27018e-09	2.05797e-09	1.71498e-10	0.000218012
1753	3.10576e-09	1.9545e-09	1.62875e-10	0.000207051
1754	2.19407e-09	1.38076e-09	1.15063e-10	0.000146271
1755	1.25282e-09	7.88417e-10	6.57014e-11	8.35212e-05
1756	1.06176e-09	6.68179e-10	5.56816e-11	7.07837e-05
1757	3.44909e-09	2.17057e-09	1.80881e-10	0.00022994
1758	2.92446e-09	1.8404e-09	1.53367e-10	0.000194964
1759	3.26881e-09	2.05711e-09	1.71426e-10	0.000217921
1760	3.25165e-09	2.04631e-09	1.70526e-10	0.000216777
1761	1.99659e-09	1.25648e-09	1.04707e-10	0.000133106
1762	1.66714e-09	1.04915e-09	8.74295e-11	0.000111142
1763	2.47296e-09	1.55627e-09	1.29689e-10	0.000164864
1764	3.50966e-09	2.20868e-09	1.84057e-10	0.000233978
1765	1.43457e-09	9.02799e-10	7.52332e-11	9.56383e-05
1766	1.02726e-09	6.46471e-10	5.38726e-11	6.84841e-05
1767	2.3999e-09	1.5103e-09	1.25858e-10	0.000159994
1768	1.35575e-09	8.53197e-10	7.10997e-11	9.03837e-05
1769	1.23933e-09	7.79926e-10	6.49939e-11	8.26217e-05
1770	6.06639e-09	3.81767e-09	3.18139e-10	0.000404426
1771	2.07708e-09	1.30714e-09	1.08928e-10	0.000138472
1772	2.03288e-09	1.27932e-09	1.0661e-10	0.000135525
1773	3.65137e-09	2.29786e-09	1.91489e-10	0.000243425
1774	2.34188e-09	1.47378e-09	1.22815e-10	0.000156125
1775	2.13669e-09	1.34465e-09	1.12054e-10	0.000142446
1776	2.07827e-09	1.30789e-09	1.08991e-10	0.000138551
1777	2.42427e-09	1.52563e-09	1.27136e-10	0.000161618
1778	1.68092e-09	1.05783e-09	8.81524e-11	0.000112061
1779	2.28316e-09	1.43683e-09	1.19736e-10	0.000152211
1780	2.79643e-09	1.75983e-09	1.46653e-10	0.000186429
1781	4.21558e-09	2.65293e-09	2.21077e-10	0.000281039
1782	5.17702e-09	3.25798e-09	2.71498e-10	0.000345135
1783	2.67233e-09	1.68174e-09	1.40145e-10	0.000178155
1784	2.34594e-09	1.47634e-09	1.23028e-10	0.000156396
1785	3.56097e-09	2.24097e-09	1.86748e-10	0.000237398
1786	2.28385e-09	1.43726e-09	1.19772e-10	0.000152257
1787	4.68902e-09	2.95087e-09	2.45906e-10	0.000312602
1788	2.98849e-09	1.8807e-09	1.56725e-10	0.000199232
1789	4.23477e-09	2.665e-09	2.22084e-10	0.000282318
1790	3.05557e-09	1.92292e-09	1.60243e-10	0.000203705
1791	2.08451e-09	1.31182e-09	1.09318e-10	0.000138968
1792	2.58976e-09	1.62978e-09	1.35815e-10	0.000172651
1793	4.327e-09	2.72305e-09	2.2692e-10	0.000288467
1794	3.06172e-09	1.92679e-09	1.60566e-10	0.000204115
1795	1.64454e-09	1.03493e-09	8.62445e-11	0.000109636
1796	7.03575e-09	4.4277e-09	3.68975e-10	0.00046905
1797	1.52204e-09	9.5784e-10	7.982e-11	0.000101469
1798	2.6562e-09	1.67158e-09	1.39299e-10	0.00017708
1799	2.69474e-09	1.69584e-09	1.4132e-10	0.000179649
1800	2.03518e-09	1.28077e-09	1.06731e-10	0.000135679
1801	4.3456e-09	2.73475e-09	2.27896e-10	0.000289707
1802	4.97895e-09	3.13333e-09	2.61111e-10	0.00033193
1803	1.46317e-09	9.20797e-10	7.6733e-11	9.75448e-05
1804	1.49132e-09	9.38512e-10	7.82093e-11	9.94215e-05
1805	5.03794e-09	3.17045e-09	2.64204e-10	0.000335862
1806	9.29117e-09	5.84707e-09	4.87256e-10	0.000619411
1807	4.08396e-09	2.5701e-09	2.14175e-10	0.000272264
1808	4.4162e-09	2.77918e-09	2.31598e-10	0.000294413
1809	1.8094e-09	1.13868e-09	9.489e-11	0.000120626
1810	1.11818e-09	7.03689e-10	5.86408e-11	7.45455e-05
1811	3.08088e-09	1.93884e-09	1.6157e-10	0.000205392
1812	1.16375e-09	7.32365e-10	6.10304e-11	7.75833e-05
1813	1.00589e-09	6.33023e-10	5.27519e-11	6.70595e-05
1814	1.17194e-09	7.37518e-10	6.14598e-11	7.81292e-05
1815	1.89544e-09	1.19283e-09	9.94023e-11	0.000126363
1816	1.59319e-09	1.00262e-09	8.35514e-11	0.000106213
1817	3.00032e-09	1.88815e-09	1.57345e-10	0.000200021
1818	3.25393e-09	2.04775e-09	1.70646e-10	0.000216929
1819	1.59909e-09	1.00633e-09	8.38608e-11	0.000106606
1820	1.5399e-09	9.69082e-10	8.07568e-11	0.00010266
1821	2.8692e-09	1.80563e-09	1.50469e-10	0.00019128
1822	2.67822e-09	1.68544e-09	1.40454e-10	0.000178548
1823	1.25767e-09	7.91473e-10	6.59561e-11	8.3845e-05
1824	4.00977e-09	2.52341e-09	2.10284e-10	0.000267318
1825	2.78285e-09	1.75129e-09	1.45941e-10	0.000185523
1826	3.1946e-09	2.01041e-09	1.67534e-10	0.000212974
1827	4.63008e-09	2.91378e-09	2.42815e-10	0.000308672
1828	2.56444e-09	1.61384e-09	1.34487e-10	0.000170963
1829	2.85804e-09	1.79861e-09	1.49884e-10	0.000190536
1830	3.7502e-09	2.36006e-09	1.96672e-10	0.000250014
1831	2.66373e-09	1.67632e-09	1.39694e-10	0.000177582
1832	4.10484e-09	2.58324e-09	2.1527e-10	0.000273656
1833	3.85045e-09	2.42315e-09	2.01929e-10	0.000256697
1834	3.30255e-09	2.07834e-09	1.73195e-10	0.00022017
1835	1.41174e-09	8.8843e-10	7.40358e-11	9.4116e-05
1836	1.66381e-09	1.04706e-09	8.72552e-11	0.000110921
1837	4.65757e-09	2.93108e-09	2.44257e-10	0.000310505
1838	3.32257e-09	2.09094e-09	1.74245e-10	0.000221504
1839	2.73275e-09	1.71976e-09	1.43313e-10	0.000182183
1840	4.52611e-09	2.84835e-09	2.37363e-10	0.000301741
1841	1.188e-09	7.47629e-10	6.23024e-11	7.92003e-05
1842	2.83388e-09	1.7834e-09	1.48617e-10	0.000188925
1843	3.48418e-09	2.19265e-09	1.82721e-10	0.000232279
1844	4.2996e-09	2.7058e-09	2.25484e-10	0.00028664
1845	3.16199e-09	1.98989e-09	1.65824e-10	0.000210799
1846	2.48598e-09	1.56447e-09	1.30372e-10	0.000165732
1847	3.41554e-09	2.14945e-09	1.79121e-10	0.000227702
1848	2.24297e-09	1.41154e-09	1.17628e-10	0.000149532
1849	3.36663e-09	2.11867e-09	1.76556e-10	0.000224442
1850	4.22087e-09	2.65626e-09	2.21355e-10	0.000281391
1851	3.18308e-09	2.00316e-09	1.6693e-10	0.000212205
1852	1.89622e-09	1.19332e-09	9.94435e-11	0.000126415
1853	2.93867e-09	1.84935e-09	1.54113e-10	0.000195911
1854	3.54535e-09	2.23114e-09	1.85928e-10	0.000236357
1855	1.24976e-09	7.86494e-10	6.55411e-11	8.33174e-05
1856	1.46483e-09	9.21842e-10	7.68202e-11	9.76556e-05
1857	2.08743e-09	1.31365e-09	1.09471e-10	0.000139162
1858	1.47562e-09	9.28627e-10	7.73856e-11	9.83743e-05
1859	2.11253e-09	1.32944e-09	1.10787e-10	0.000140835
1860	1.0543e-09	6.63484e-10	5.52904e-11	7.02864e-05
1861	6.60868e-09	4.15894e-09	3.46579e-10	0.000440579
1862	2.80193e-09	1.7633e-09	1.46941e-10	0.000186795
1863	5.38022e-09	3.38585e-09	2.82155e-10	0.000358681
1864	2.36445e-09	1.48799e-09	1.23999e-10	0.00015763
1865	2.16075e-09	1.35979e-09	1.13316e-10	0.00014405
1866	1.75832e-09	1.10654e-09	9.22114e-11	0.000117221
1867	2.37773e-09	1.49634e-09	1.24695e-10	0.000158516
1868	3.99645e-09	2.51502e-09	2.09585e-10	0.00026643
1869	2.97342e-09	1.87122e-09	1.55935e-10	0.000198228
1870	2.59413e-09	1.63253e-09	1.36044e-10	0.000172942
1871	4.29048e-09	2.70006e-09	2.25005e-10	0.000286032
1872	4.0152e-09	2.52683e-09	2.10569e-10	0.00026768
1873	1.5393e-09	9.68706e-10	8.07255e-11	0.00010262
1874	2.21829e-09	1.396e-09	1.16333e-10	0.000147886
1875	4.55551e-09	2.86685e-09	2.38904e-10	0.000303701
1876	3.16743e-09	1.99331e-09	1.66109e-10	0.000211162
1877	1.62753e-09	1.02423e-09	8.53522e-11	0.000108502
1878	1.5893e-09	1.00017e-09	8.33478e-11	0.000105954
1879	2.59775e-09	1.6348e-09	1.36234e-10	0.000173183
1880	1.22847e-09	7.73095e-10	6.44246e-11	8.18981e-05
1881	3.9934e-09	2.51311e-09	2.09426e-10	0.000266227
1882	1.68755e-09	1.062e-09	8.84998e-11	0.000112503
1883	2.80165e-09	1.76312e-09	1.46927e-10	0.000186777
1884	2.23916e-09	1.40914e-09	1.17428e-10	0.000149277
1885	1.50812e-09	9.4908e-10	7.909e-11	0.000100541
1886	6.71409e-09	4.22528e-09	3.52107e-10	0.000447606
1887	1.66981e-09	1.05084e-09	8.75697e-11	0.000111321
1888	2.46383e-09	1.55053e-09	1.2921e-10	0.000164255
1889	1.22474e-09	7.70748e-10	6.4229e-11	8.16494e-05
1890	2.45771e-09	1.54667e-09	1.28889e-10	0.000163847
1891	1.94928e-09	1.22671e-09	1.02226e-10	0.000129952
1892	4.60854e-09	2.90023e-09	2.41685e-10	0.000307236
1893	5.51048e-09	3.46783e-09	2.88986e-10	0.000367365
1894	1.82927e-09	1.15119e-09	9.59321e-11	0.000121951
1895	2.17586e-09	1.3693e-09	1.14108e-10	0.000145057
1896	2.57247e-09	1.61889e-09	1.34908e-10	0.000171498
1897	2.53791e-09	1.59715e-09	1.33095e-10	0.000169194
1898	3.15986e-09	1.98854e-09	1.65712e-10	0.000210657
1899	1.76021e-09	1.10773e-09	9.23105e-11	0.000117347
1900	4.48683e-09	2.82363e-09	2.35302e-10	0.000299122
1901	2.66851e-09	1.67933e-09	1.39944e-10	0.000177901
1902	5.53924e-09	3.48593e-09	2.90494e-10	0.000369283
1903	2.2876e-09	1.43962e-09	1.19969e-10	0.000152507
1904	3.34181e-09	2.10305e-09	1.75254e-10	0.000222787
1905	1.50481e-09	9.46998e-10	7.89165e-11	0.00010032
1906	3.05503e-09	1.92258e-09	1.60215e-10	0.000203669
1907	3.69878e-09	2.3277e-09	1.93975e-10	0.000246586
1908	3.03951e-09	1.91281e-09	1.59401e-10	0.000202634
1909	2.21033e-09	1.39099e-09	1.15916e-10	0.000147355
1910	3.43502e-09	2.16171e-09	1.80142e-10	0.000229001
1911	3.90739e-09	2.45898e-09	2.04915e-10	0.000260492
1912	2.0144e-09	1.26769e-09	1.05641e-10	0.000134293
1913	1.73232e-09	1.09017e-09	9.08477e-11	0.000115488
1914	7.66201e-10	4.82182e-10	4.01818e-11	5.10801e-05
1915	9.43406e-10	5.93699e-10	4.9475e-11	6.28937e-05
1916	2.283e-09	1.43673e-09	1.19727e-10	0.0001522
1917	2.00029e-09	1.25881e-09	1.04901e-10	0.000133353
1918	3.76464e-09	2.36914e-09	1.97429e-10	0.000250976
1919	4.62823e-09	2.91261e-09	2.42718e-10	0.000308548
1920	2.30372e-09	1.44976e-09	1.20814e-10	0.000153581
1921	2.84842e-09	1.79255e-09	1.49379e-10	0.000189895
1922	1.047e-09	6.58894e-10	5.49078e-11	6.98001e-05
1923	4.85709e-09	3.05664e-09	2.5472e-10	0.000323806
1924	5.23337e-09	3.29344e-09	2.74453e-10	0.000348892
1925	4.27138e-09	2.68804e-09	2.24004e-10	0.000284759
1926	2.70741e-09	1.70381e-09	1.41984e-10	0.000180494
1927	2.55045e-09	1.60504e-09	1.33753e-10	0.00017003
1928	3.43437e-09	2.1613e-09	1.80109e-10	0.000228958
1929	1.18197e-09	7.43831e-10	6.19859e-11	7.87979e-05
1930	2.40734e-09	1.51497e-09	1.26248e-10	0.000160489
1931	3.47915e-09	2.18948e-09	1.82457e-10	0.000231944
1932	2.6902e-09	1.69298e-09	1.41082e-10	0.000179346
1933	3.79533e-09	2.38846e-09	1.99038e-10	0.000253022
1934	2.54757e-09	1.60323e-09	1.33602e-10	0.000169838
1935	2.92707e-09	1.84205e-09	1.53504e-10	0.000195138
1936	2.91995e-09	1.83757e-09	1.53131e-10	0.000194663
1937	4.20129e-09	2.64394e-09	2.20328e-10	0.000280086
1938	3.4793e-09	2.18958e-09	1.82465e-10	0.000231954
1939	1.23368e-09	7.76376e-10	6.4698e-11	8.22456e-05
1940	4.18601e-09	2.63432e-09	2.19526e-10	0.000279067
1941	1.46425e-09	9.21472e-10	7.67893e-11	9.76164e-05
1942	7.64399e-09	4.81048e-09	4.00873e-10	0.000509599
1943	1.68617e-09	1.06113e-09	8.84276e-11	0.000112411
1944	1.87974e-09	1.18295e-09	9.8579e-11	0.000125316
1945	1.97819e-09	1.24491e-09	1.03742e-10	0.000131879
1946	4.3492e-09	2.73702e-09	2.28085e-10	0.000289947
1947	1.85082e-09	1.16475e-09	9.70627e-11	0.000123388
1948	2.61646e-09	1.64658e-09	1.37215e-10	0.000174431
1949	1.81871e-09	1.14454e-09	9.53787e-11	0.000121248
1950	9.28635e-10	5.84404e-10	4.87003e-11	6.1909e-05
1951	2.45924e-09	1.54764e-09	1.2897e-10	0.000163949
1952	3.0509e-09	1.91998e-09	1.59998e-10	0.000203393
1953	1.79134e-09	1.12731e-09	9.39429e-11	0.000119422
1954	1.95667e-09	1.23136e-09	1.02613e-10	0.000130444
1955	3.06282e-09	1.92748e-09	1.60623e-10	0.000204188
1956	2.21499e-09	1.39392e-09	1.1616e-10	0.000147666
1957	3.32176e-09	2.09043e-09	1.74203e-10	0.000221451
1958	1.81762e-09	1.14385e-09	9.53212e-11	0.000121175
1959	5.30865e-09	3.34081e-09	2.78401e-10	0.00035391
1960	1.82845e-09	1.15067e-09	9.58893e-11	0.000121897
1961	1.67493e-09	1.05406e-09	8.78384e-11	0.000111662
1962	2.73279e-09	1.71979e-09	1.43316e-10	0.000182186
1963	3.79719e-09	2.38963e-09	1.99136e-10	0.000253146
1964	2.02494e-09	1.27432e-09	1.06194e-10	0.000134996
1965	1.78935e-09	1.12607e-09	9.38388e-11	0.00011929
1966	9.81295e-10	6.17544e-10	5.1462e-11	6.54197e-05
1967	5.61972e-09	3.53658e-09	2.94715e-10	0.000374648
1968	2.2715e-09	1.42949e-09	1.19124e-10	0.000151433
1969	1.63868e-09	1.03125e-09	8.59373e-11	0.000109246
1970	2.56742e-09	1.61572e-09	1.34643e-10	0.000171161
1971	1.47038e-09	9.25332e-10	7.7111e-11	9.80253e-05
1972	1.60484e-09	1.00995e-09	8.41623e-11	0.000106989
1973	9.24775e-10	5.81975e-10	4.84979e-11	6.16517e-05
1974	2.58702e-09	1.62805e-09	1.35671e-10	0.000172468
1975	1.51622e-09	9.54183e-10	7.95152e-11	0.000101082
1976	4.68011e-09	2.94526e-09	2.45439e-10	0.000312007
1977	2.72291e-09	1.71357e-09	1.42798e-10	0.000181528
1978	5.95947e-09	3.75039e-09	3.12532e-10	0.000397298
1979	1.10673e-09	6.96483e-10	5.80403e-11	7.37821e-05
1980	1.73473e-09	1.09169e-09	9.09742e-11	0.000115648
1981	3.9433e-09	2.48158e-09	2.06798e-10	0.000262887
1982	2.07914e-09	1.30843e-09	1.09036e-10	0.000138609
1983	1.73174e-09	1.08981e-09	9.08175e-11	0.000115449
1984	2.66372e-09	1.67632e-09	1.39693e-10	0.000177581
1985	8.99974e-10	5.66367e-10	4.71972e-11	5.99982e-05
1986	2.57752e-09	1.62207e-09	1.35173e-10	0.000171834
1987	2.86986e-09	1.80605e-09	1.50504e-10	0.000191324
1988	1.22611e-09	7.71608e-10	6.43006e-11	8.17405e-05
1989	2.47051e-09	1.55473e-09	1.29561e-10	0.000164701
1990	6.0141e-09	3.78476e-09	3.15397e-10	0.00040094
1991	2.32788e-09	1.46497e-09	1.22081e-10	0.000155192
1992	1.41751e-09	8.92059e-10	7.43382e-11	9.45005e-05
1993	1.89456e-09	1.19228e-09	9.93563e-11	0.000126304
1994	1.14138e-09	7.18288e-10	5.98573e-11	7.6092e-05
1995	3.32724e-09	2.09388e-09	1.7449e-10	0.000221816
1996	1.44933e-09	9.12083e-10	7.60069e-11	9.66218e-05
1997	1.79226e-09	1.1279e-09	9.39913e-11	0.000119484
1998	2.7391e-09	1.72376e-09	1.43647e-10	0.000182607
1999	2.26704e-09	1.42668e-09	1.1889e-10	0.000151136
[truncated: 8,001 more rows]
