# Supplementary material for: Health risk assessment from habitants of Araró, Michoacán, México, exposed to arsenic by dust, using Monte Carlo probabilistic method
Source: PeerJ. 2025 Jun 10;13:e18805. doi: 10.7717/peerj.18805 (PMC12164815; doi:10.7717/peerj.18805)
Supplement: Supplemental Information 4 [file peerj-13-18805-s004.xlsx]

## Sheet: Risk Premises
Study Title:	Ingestión premisas simulación.					Last simulation run:
Study File:	Ingestión premisas simulación.xlsx					2022-11-04 19:52:28
	Output Cells	Histogram settings				Multi-cell output range names
Description for Reports	Range Names	Min value	Max value	Step size		title row or column (optional)
	ADD	Auto	Auto	Auto
	ADDc	Auto	Auto	Auto
	CR	Auto	Auto	Auto
	HQ	Auto	Auto	Auto
		Study	Min				Max
	Input Cells	File	Allowed		Expected		Allowed
Description for Reports	Range Names	Values	Values	10/90	Values	90/10	Values	Distributions	Parameters and chart settings
	BW	16.31	5.8	11.0965	16.3774	21.6424	39	Normal	Mean	16.31	std dev	4.15	X Axis Min	auto	X Axis Max	auto
	Cs	15.6	5.94	10.1171	15.7996	21.5085	42.53	Normal	Mean	15.6	std dev	4.57375	X Axis Min	auto	X Axis Max	auto
	ED	3.51	2	3.02944	3.50999	3.99077	5	Normal	Mean	3.51	std dev	0.375	X Axis Min	auto	X Axis Max	auto
	IR	100	50	76.2575	100.214	124.071	200	Normal	Mean	100	std dev	18.75	X Axis Min	auto	X Axis Max	auto

## Sheet: Simulation Summary
	10000	Simulations run
					Change in expected values as simulations increase									Change in standard deviation as simulations increase
	Minimum result	Maximum result	Expected value	Std deviation	125	250	500	1000	2000	4000	8000	10000		125	250	500	1000	2000	4000	8000	10000
ADD	2.06702e-05	0.000431675	0.000104553	4.87647e-05	-	0.0462063	-0.01744	-0.00491065	0.00443952	0.00932376	0.00757826	0.000986098		-	0.219024	-0.0481909	0.0370802	0.012576	0.0317021	0.0127419	0.00150106
ADDc	9.96223e-07	2.0805e-05	5.03905e-06	2.35027e-06	-	0.0462063	-0.01744	-0.00491065	0.00443952	0.00932376	0.00757826	0.000986098		-	0.219024	-0.0481909	0.0370802	0.012576	0.0317021	0.0127419	0.00150106
CR	6.64149e-07	1.387e-05	3.35937e-06	1.56684e-06	-	0.0462063	-0.01744	-0.00491065	0.00443952	0.00932376	0.00757826	0.000986098		-	0.219024	-0.0481909	0.0370802	0.012576	0.0317021	0.0127419	0.00150106
HQ	0.0689007	1.43892	0.348511	0.162549	-	0.0462063	-0.01744	-0.00491065	0.00443952	0.00932376	0.00757826	0.000986098		-	0.219024	-0.0481909	0.0370802	0.012576	0.0317021	0.0127419	0.00150106

## Sheet: Simulation variance
This worksheet shows the convergence of the output variables as a function of the number of simulations
You should run enough simulations until the % change is very small, typically < 1.0%
ADD
	# of Sims	125	250	500	1000	2000	4000	8000	10000
	Avg Value	9.99626e-05	0.000104582	0.000102758	0.000102253	0.000102707	0.000103665	0.00010445	0.000104553
	% Chg		0.0462063	-0.01744	-0.00491065	0.00443952	0.00932376	0.00757826	0.000986098
	Std Dev.	3.82471e-05	4.66241e-05	4.43773e-05	4.60228e-05	4.66016e-05	4.80789e-05	4.86916e-05	4.87647e-05
	% Chg		0.219024	-0.0481909	0.0370802	0.012576	0.0317021	0.0127419	0.00150106
ADDc
	# of Sims	125	250	500	1000	2000	4000	8000	10000
	Avg Value	4.81781e-06	5.04042e-06	4.95251e-06	4.92819e-06	4.95007e-06	4.99623e-06	5.03409e-06	5.03905e-06
	% Chg		0.0462063	-0.01744	-0.00491065	0.00443952	0.00932376	0.00757826	0.000986098
	Std Dev.	1.84336e-06	2.2471e-06	2.13881e-06	2.21812e-06	2.24601e-06	2.31722e-06	2.34674e-06	2.35027e-06
	% Chg		0.219024	-0.0481909	0.0370802	0.012576	0.0317021	0.0127419	0.00150106
CR
	# of Sims	125	250	500	1000	2000	4000	8000	10000
	Avg Value	3.21187e-06	3.36028e-06	3.30168e-06	3.28546e-06	3.30005e-06	3.33082e-06	3.35606e-06	3.35937e-06
	% Chg		0.0462063	-0.01744	-0.00491065	0.00443952	0.00932376	0.00757826	0.000986098
	Std Dev.	1.22891e-06	1.49807e-06	1.42587e-06	1.47875e-06	1.49734e-06	1.54481e-06	1.56449e-06	1.56684e-06
	% Chg		0.219024	-0.0481909	0.0370802	0.012576	0.0317021	0.0127419	0.00150106
HQ
	# of Sims	125	250	500	1000	2000	4000	8000	10000
	Avg Value	0.333209	0.348605	0.342525	0.340843	0.342357	0.345549	0.348167	0.348511
	% Chg		0.0462063	-0.01744	-0.00491065	0.00443952	0.00932376	0.00757826	0.000986098
	Std Dev.	0.12749	0.155414	0.147924	0.153409	0.155339	0.160263	0.162305	0.162549
	% Chg		0.219024	-0.0481909	0.0370802	0.012576	0.0317021	0.0127419	0.00150106

## Sheet: ADD Results
ADD Results
Minimum result	2.06702e-05				9.56079e-05	Study value
Maximum result	0.000431675				0.5001	of results are equal or lower
Expected value	0.000104553				0.4999	of results are equal or greater
Std Deviation	4.87647e-05
Out of 10000 simulations		Of those with numeric values:
10000 had numeric values.			5% <=	4.3759e-05
0 had error values.			10% <=	5.20177e-05
			15% <=	5.85248e-05
			20% <=	6.42675e-05
			25% <=	6.97532e-05
			30% <=	7.50748e-05
			35% <=	8.02395e-05
			40% <=	8.51502e-05
			45% <=	9.01126e-05
			50% <=	9.55975e-05
			55% <=	0.000101165
			60% <=	0.000107198
			65% <=	0.000112966
			70% <=	0.000120374
			75% <=	0.000128646
			80% <=	0.000139051
			85% <=	0.000150492
			90% <=	0.000167594
			95% <=	0.000195147
			100% <=	0.000431675
If ADD is:				9.56079e-05	0.5001	of results are equal or lower
(Chg to do what ifs)					0.4999	of results are greater
					Cumulative				Cumulative
ADD	frequency:				frequency:				frequency:
<=2.06702E-05	1	0.0001		<=2.06702E-05	1	0.0001		=>2.06702E-05	10000	1
2.06702E-05 to 4.2302E-05	425	0.0425		<=4.2302E-05	426	0.0426		=>4.2302E-05	9574	0.9574
4.2302E-05 to 6.39339E-05	1541	0.1541		<=6.39339E-05	1967	0.1967		=>6.39339E-05	8033	0.8033
6.39339E-05 to 8.55657E-05	2085	0.2085		<=8.55657E-05	4052	0.4052		=>8.55657E-05	5948	0.5948
8.55657E-05 to 0.000107198	1947	0.1947		<=0.000107198	5999	0.5999		=>0.000107198	4001	0.4001
0.000107198 to 0.000128829	1511	0.1511		<=0.000128829	7510	0.751		=>0.000128829	2490	0.249
0.000128829 to 0.000150461	987	0.0987		<=0.000150461	8497	0.8497		=>0.000150461	1503	0.1503
0.000150461 to 0.000172093	609	0.0609		<=0.000172093	9106	0.9106		=>0.000172093	894	0.0894
0.000172093 to 0.000193725	379	0.0379		<=0.000193725	9485	0.9485		=>0.000193725	515	0.0515
0.000193725 to 0.000215357	204	0.0204		<=0.000215357	9689	0.9689		=>0.000215357	311	0.0311
0.000215357 to 0.000236989	105	0.0105		<=0.000236989	9794	0.9794		=>0.000236989	206	0.0206
0.000236989 to 0.00025862	80	0.008		<=0.00025862	9874	0.9874		=>0.00025862	126	0.0126
0.00025862 to 0.000280252	52	0.0052		<=0.000280252	9926	0.9926		=>0.000280252	74	0.0074
0.000280252 to 0.000301884	34	0.0034		<=0.000301884	9960	0.996		=>0.000301884	40	0.004
0.000301884 to 0.000323516	16	0.0016		<=0.000323516	9976	0.9976		=>0.000323516	24	0.0024
0.000323516 to 0.000345148	12	0.0012		<=0.000345148	9988	0.9988		=>0.000345148	12	0.0012
0.000345148 to 0.00036678	6	0.0006		<=0.00036678	9994	0.9994		=>0.00036678	6	0.0006
0.00036678 to 0.000388411	1	0.0001		<=0.000388411	9995	0.9995		=>0.000388411	5	0.0005
0.000388411 to 0.000410043	2	0.0002		<=0.000410043	9997	0.9997		=>0.000410043	3	0.0003
0.000410043 to 0.000431675	3	0.0003		<=0.000431675	10000	1		=>0.000431675	1	0.0001
>0.000431675	0	0
Bin Size	2.16318e-05
Number of bins	21
# of Sims	Avg Value	% Chg		Std Dev.	% Chg
125	9.99626e-05			3.82471e-05
250	0.000104582	0.0462063		4.66241e-05	0.219024
500	0.000102758	-0.01744		4.43773e-05	-0.0481909
1000	0.000102253	-0.00491065		4.60228e-05	0.0370802
2000	0.000102707	0.00443952		4.66016e-05	0.012576
4000	0.000103665	0.00932376		4.80789e-05	0.0317021
8000	0.00010445	0.00757826		4.86916e-05	0.0127419
10000	0.000104553	0.000986098		4.87647e-05	0.00150106

## Sheet: ADDc Results
ADDc Results
Minimum result	9.96223e-07				4.60793e-06	Study value
Maximum result	2.0805e-05				0.5001	of results are equal or lower
Expected value	5.03905e-06				0.4999	of results are equal or greater
Std Deviation	2.35027e-06
Out of 10000 simulations		Of those with numeric values:
10000 had numeric values.			5% <=	2.10901e-06
0 had error values.			10% <=	2.50705e-06
			15% <=	2.82066e-06
			20% <=	3.09744e-06
			25% <=	3.36183e-06
			30% <=	3.61831e-06
			35% <=	3.86723e-06
			40% <=	4.10391e-06
			45% <=	4.34307e-06
			50% <=	4.60743e-06
			55% <=	4.87574e-06
			60% <=	5.16653e-06
			65% <=	5.44452e-06
			70% <=	5.80154e-06
			75% <=	6.20024e-06
			80% <=	6.70173e-06
			85% <=	7.25313e-06
			90% <=	8.07738e-06
			95% <=	9.40534e-06
			100% <=	2.0805e-05
If ADDc is:				4.60793e-06	0.5001	of results are equal or lower
(Chg to do what ifs)					0.4999	of results are greater
					Cumulative				Cumulative
ADDc	frequency:				frequency:				frequency:
<=9.96223E-07	1	0.0001		<=9.96223E-07	1	0.0001		=>9.96223E-07	10000	1
9.96223E-07 to 2.03879E-06	425	0.0425		<=2.03879E-06	426	0.0426		=>2.03879E-06	9574	0.9574
2.03879E-06 to 3.08136E-06	1541	0.1541		<=3.08136E-06	1967	0.1967		=>3.08136E-06	8033	0.8033
3.08136E-06 to 4.12393E-06	2085	0.2085		<=4.12393E-06	4052	0.4052		=>4.12393E-06	5948	0.5948
4.12393E-06 to 5.1665E-06	1947	0.1947		<=5.1665E-06	5999	0.5999		=>5.1665E-06	4001	0.4001
5.1665E-06 to 6.20907E-06	1511	0.1511		<=6.20907E-06	7510	0.751		=>6.20907E-06	2490	0.249
6.20907E-06 to 7.25164E-06	987	0.0987		<=7.25164E-06	8497	0.8497		=>7.25164E-06	1503	0.1503
7.25164E-06 to 8.29421E-06	609	0.0609		<=8.29421E-06	9106	0.9106		=>8.29421E-06	894	0.0894
8.29421E-06 to 9.33678E-06	379	0.0379		<=9.33678E-06	9485	0.9485		=>9.33678E-06	515	0.0515
9.33678E-06 to 1.03793E-05	204	0.0204		<=1.03793E-05	9689	0.9689		=>1.03793E-05	311	0.0311
1.03793E-05 to 1.14219E-05	105	0.0105		<=1.14219E-05	9794	0.9794		=>1.14219E-05	206	0.0206
1.14219E-05 to 1.24645E-05	80	0.008		<=1.24645E-05	9874	0.9874		=>1.24645E-05	126	0.0126
1.24645E-05 to 1.35071E-05	52	0.0052		<=1.35071E-05	9926	0.9926		=>1.35071E-05	74	0.0074
1.35071E-05 to 1.45496E-05	34	0.0034		<=1.45496E-05	9960	0.996		=>1.45496E-05	40	0.004
1.45496E-05 to 1.55922E-05	16	0.0016		<=1.55922E-05	9976	0.9976		=>1.55922E-05	24	0.0024
1.55922E-05 to 1.66348E-05	12	0.0012		<=1.66348E-05	9988	0.9988		=>1.66348E-05	12	0.0012
1.66348E-05 to 1.76773E-05	6	0.0006		<=1.76773E-05	9994	0.9994		=>1.76773E-05	6	0.0006
1.76773E-05 to 1.87199E-05	1	0.0001		<=1.87199E-05	9995	0.9995		=>1.87199E-05	5	0.0005
1.87199E-05 to 1.97625E-05	2	0.0002		<=1.97625E-05	9997	0.9997		=>1.97625E-05	3	0.0003
1.97625E-05 to 2.0805E-05	3	0.0003		<=2.0805E-05	10000	1		=>2.0805E-05	1	0.0001
>2.0805E-05	0	0
Bin Size	1.04257e-06
Number of bins	21
# of Sims	Avg Value	% Chg		Std Dev.	% Chg
125	4.81781e-06			1.84336e-06
250	5.04042e-06	0.0462063		2.2471e-06	0.219024
500	4.95251e-06	-0.01744		2.13881e-06	-0.0481909
1000	4.92819e-06	-0.00491065		2.21812e-06	0.0370802
2000	4.95007e-06	0.00443952		2.24601e-06	0.012576
4000	4.99623e-06	0.00932376		2.31722e-06	0.0317021
8000	5.03409e-06	0.00757826		2.34674e-06	0.0127419
10000	5.03905e-06	0.000986098		2.35027e-06	0.00150106

## Sheet: CR Results
CR Results
Minimum result	6.64149e-07				3.07195e-06	Study value
Maximum result	1.387e-05				0.5001	of results are equal or lower
Expected value	3.35937e-06				0.4999	of results are equal or greater
Std Deviation	1.56684e-06
Out of 10000 simulations		Of those with numeric values:
10000 had numeric values.			5% <=	1.40601e-06
0 had error values.			10% <=	1.67137e-06
			15% <=	1.88044e-06
			20% <=	2.06496e-06
			25% <=	2.24122e-06
			30% <=	2.41221e-06
			35% <=	2.57815e-06
			40% <=	2.73594e-06
			45% <=	2.89538e-06
			50% <=	3.07162e-06
			55% <=	3.25049e-06
			60% <=	3.44435e-06
			65% <=	3.62968e-06
			70% <=	3.8677e-06
			75% <=	4.13349e-06
			80% <=	4.46782e-06
			85% <=	4.83542e-06
			90% <=	5.38492e-06
			95% <=	6.27022e-06
			100% <=	1.387e-05
If CR is:				3.07195e-06	0.5001	of results are equal or lower
(Chg to do what ifs)					0.4999	of results are greater
					Cumulative				Cumulative
CR	frequency:				frequency:				frequency:
<=6.64149E-07	1	0.0001		<=6.64149E-07	1	0.0001		=>6.64149E-07	10000	1
6.64149E-07 to 1.35919E-06	425	0.0425		<=1.35919E-06	426	0.0426		=>1.35919E-06	9574	0.9574
1.35919E-06 to 2.05424E-06	1541	0.1541		<=2.05424E-06	1967	0.1967		=>2.05424E-06	8033	0.8033
2.05424E-06 to 2.74929E-06	2085	0.2085		<=2.74929E-06	4052	0.4052		=>2.74929E-06	5948	0.5948
2.74929E-06 to 3.44433E-06	1947	0.1947		<=3.44433E-06	5999	0.5999		=>3.44433E-06	4001	0.4001
3.44433E-06 to 4.13938E-06	1511	0.1511		<=4.13938E-06	7510	0.751		=>4.13938E-06	2490	0.249
4.13938E-06 to 4.83443E-06	987	0.0987		<=4.83443E-06	8497	0.8497		=>4.83443E-06	1503	0.1503
4.83443E-06 to 5.52947E-06	609	0.0609		<=5.52947E-06	9106	0.9106		=>5.52947E-06	894	0.0894
5.52947E-06 to 6.22452E-06	379	0.0379		<=6.22452E-06	9485	0.9485		=>6.22452E-06	515	0.0515
6.22452E-06 to 6.91957E-06	204	0.0204		<=6.91957E-06	9689	0.9689		=>6.91957E-06	311	0.0311
6.91957E-06 to 7.61461E-06	105	0.0105		<=7.61461E-06	9794	0.9794		=>7.61461E-06	206	0.0206
7.61461E-06 to 8.30966E-06	80	0.008		<=8.30966E-06	9874	0.9874		=>8.30966E-06	126	0.0126
8.30966E-06 to 9.0047E-06	52	0.0052		<=9.0047E-06	9926	0.9926		=>9.0047E-06	74	0.0074
9.0047E-06 to 9.69975E-06	34	0.0034		<=9.69975E-06	9960	0.996		=>9.69975E-06	40	0.004
9.69975E-06 to 1.03948E-05	16	0.0016		<=1.03948E-05	9976	0.9976		=>1.03948E-05	24	0.0024
1.03948E-05 to 1.10898E-05	12	0.0012		<=1.10898E-05	9988	0.9988		=>1.10898E-05	12	0.0012
1.10898E-05 to 1.17849E-05	6	0.0006		<=1.17849E-05	9994	0.9994		=>1.17849E-05	6	0.0006
1.17849E-05 to 1.24799E-05	1	0.0001		<=1.24799E-05	9995	0.9995		=>1.24799E-05	5	0.0005
1.24799E-05 to 1.3175E-05	2	0.0002		<=1.3175E-05	9997	0.9997		=>1.3175E-05	3	0.0003
1.3175E-05 to 1.387E-05	3	0.0003		<=1.387E-05	10000	1		=>1.387E-05	1	0.0001
>1.387E-05	0	0
Bin Size	6.95046e-07
Number of bins	21
# of Sims	Avg Value	% Chg		Std Dev.	% Chg
125	3.21187e-06			1.22891e-06
250	3.36028e-06	0.0462063		1.49807e-06	0.219024
500	3.30168e-06	-0.01744		1.42587e-06	-0.0481909
1000	3.28546e-06	-0.00491065		1.47875e-06	0.0370802
2000	3.30005e-06	0.00443952		1.49734e-06	0.012576
4000	3.33082e-06	0.00932376		1.54481e-06	0.0317021
8000	3.35606e-06	0.00757826		1.56449e-06	0.0127419
10000	3.35937e-06	0.000986098		1.56684e-06	0.00150106

## Sheet: HQ Results
HQ Results
Minimum result	0.0689007				0.318693	Study value
Maximum result	1.43892				0.5001	of results are equal or lower
Expected value	0.348511				0.4999	of results are equal or greater
Std Deviation	0.162549
Out of 10000 simulations		Of those with numeric values:
10000 had numeric values.			5% <=	0.145863
0 had error values.			10% <=	0.173392
			15% <=	0.195083
			20% <=	0.214225
			25% <=	0.232511
			30% <=	0.250249
			35% <=	0.267465
			40% <=	0.283834
			45% <=	0.300375
			50% <=	0.318658
			55% <=	0.337215
			60% <=	0.357327
			65% <=	0.376553
			70% <=	0.401246
			75% <=	0.42882
			80% <=	0.463504
			85% <=	0.50164
			90% <=	0.558647
			95% <=	0.650491
			100% <=	1.43892
If HQ is:				0.318693	0.5001	of results are equal or lower
(Chg to do what ifs)					0.4999	of results are greater
					Cumulative				Cumulative
HQ	frequency:				frequency:				frequency:
<=0.068900689	1	0.0001		<=0.068900689	1	0.0001		=>0.068900689	10000	1
0.068900689 to 0.141006797	425	0.0425		<=0.141006797	426	0.0426		=>0.141006797	9574	0.9574
0.141006797 to 0.213112905	1541	0.1541		<=0.213112905	1967	0.1967		=>0.213112905	8033	0.8033
0.213112905 to 0.285219013	2085	0.2085		<=0.285219013	4052	0.4052		=>0.285219013	5948	0.5948
0.285219013 to 0.357325121	1947	0.1947		<=0.357325121	5999	0.5999		=>0.357325121	4001	0.4001
0.357325121 to 0.429431229	1511	0.1511		<=0.429431229	7510	0.751		=>0.429431229	2490	0.249
0.429431229 to 0.501537337	987	0.0987		<=0.501537337	8497	0.8497		=>0.501537337	1503	0.1503
0.501537337 to 0.573643445	609	0.0609		<=0.573643445	9106	0.9106		=>0.573643445	894	0.0894
0.573643445 to 0.645749553	379	0.0379		<=0.645749553	9485	0.9485		=>0.645749553	515	0.0515
0.645749553 to 0.717855661	204	0.0204		<=0.717855661	9689	0.9689		=>0.717855661	311	0.0311
0.717855661 to 0.789961769	105	0.0105		<=0.789961769	9794	0.9794		=>0.789961769	206	0.0206
0.789961769 to 0.862067877	80	0.008		<=0.862067877	9874	0.9874		=>0.862067877	126	0.0126
0.862067877 to 0.934173985	52	0.0052		<=0.934173985	9926	0.9926		=>0.934173985	74	0.0074
0.934173985 to 1.006280093	34	0.0034		<=1.006280093	9960	0.996		=>1.006280093	40	0.004
1.006280093 to 1.078386201	16	0.0016		<=1.078386201	9976	0.9976		=>1.078386201	24	0.0024
1.078386201 to 1.150492309	12	0.0012		<=1.150492309	9988	0.9988		=>1.150492309	12	0.0012
1.150492309 to 1.222598417	6	0.0006		<=1.222598417	9994	0.9994		=>1.222598417	6	0.0006
1.222598417 to 1.294704525	1	0.0001		<=1.294704525	9995	0.9995		=>1.294704525	5	0.0005
1.294704525 to 1.366810633	2	0.0002		<=1.366810633	9997	0.9997		=>1.366810633	3	0.0003
1.366810633 to 1.438916741	3	0.0003		<=1.438916741	10000	1		=>1.438916741	1	0.0001
>1.438916741	0	0
Bin Size	0.0721061
Number of bins	21
# of Sims	Avg Value	% Chg		Std Dev.	% Chg
125	0.333209			0.12749
250	0.348605	0.0462063		0.155414	0.219024
500	0.342525	-0.01744		0.147924	-0.0481909
1000	0.340843	-0.00491065		0.153409	0.0370802
2000	0.342357	0.00443952		0.155339	0.012576
4000	0.345549	0.00932376		0.160263	0.0317021
8000	0.348167	0.00757826		0.162305	0.0127419
10000	0.348511	0.000986098		0.162549	0.00150106

## Sheet: Simulation Input Values 1
Sim #	BW	Cs	ED	IR
1	19.4086	15.6555	3.12075	78.5304
2	12.0394	10.806	3.08895	110.232
3	10.5871	16.4364	3.45262	89.0368
4	11.5556	14.7035	3.21077	86.8825
5	17.8022	22.0639	3.88139	86.9098
6	13.4935	15.8017	2.8375	129.225
7	16.6647	19.0395	3.16621	62.8926
8	26.9763	15.6899	3.94815	98.8174
9	13.4818	11.4502	3.83543	74.2571
10	16.1064	16.1275	3.80033	85.5687
11	12.0989	15.8872	2.99225	118.648
12	23.6528	13.9939	2.89083	113.048
13	7.80773	21.1232	3.13246	92.0261
14	19.3408	18.7968	3.38019	99.9027
15	12.4051	9.95163	3.90953	106.683
16	11.9573	12.4285	3.53747	106.401
17	15.0226	11.0228	3.2113	102.431
18	23.9527	16.9052	3.45194	93.4421
19	14.3299	15.1505	3.46542	123.116
20	13.7816	12.2539	3.49456	58.5884
21	16.4003	23.3791	3.26446	77.7352
22	12.52	12.3543	3.77334	115.908
23	19.8397	16.7352	3.2653	117.942
24	15.2054	7.21926	3.56786	92.0639
25	21.0704	20.5318	3.54887	88.5898
26	18.3974	19.1655	3.97356	77.4559
27	18.8355	12.1743	3.11907	117.237
28	15.5664	21.9434	4.14112	63.7911
29	12.7845	18.0328	3.57773	100.072
30	8.9604	17.1965	3.65863	119.611
31	15.7108	13.2624	3.26444	98.8481
32	16.6523	14.479	3.03465	113.329
33	15.8069	16.3686	3.03236	102.175
34	15.7509	10.0379	3.84678	101.985
35	8.95501	23.5551	3.662	77.6979
36	13.6499	17.9814	3.4779	120.159
37	19.57	10.5409	3.40877	105.818
38	11.1419	16.5456	2.91097	121.564
39	21.2821	21.1059	3.49114	118.788
40	16.409	17.7893	3.33034	123.17
41	22.6349	22.1657	3.29378	82.8331
42	19.2584	17.1207	3.93588	101.817
43	16.8402	21.8812	3.32029	105.587
44	15.4611	12.5078	3.74817	88.6827
45	20.7146	24.6094	3.70663	85.0404
46	19.8818	8.96463	3.84874	122.103
47	26.7406	11.3507	3.76322	104.905
48	16.4	20.0901	3.42066	136.91
49	17.6257	7.67968	3.40084	100.216
50	21.25	24.7991	3.69642	99.9593
51	15.4844	8.00209	3.67969	84.8896
52	16.8117	10.6063	3.25385	85.6288
53	17.087	10.3744	3.34183	75.0271
54	21.38	17.4856	3.5511	86.8374
55	14.0046	11.048	3.18446	75.7758
56	16.9035	9.54112	3.45092	99.2628
57	13.9816	15.4204	3.77794	87.8329
58	23.9932	17.817	3.68241	84.5545
59	14.1979	14.3195	3.67277	82.6532
60	19.8691	21.304	3.41695	99.3425
61	17.316	16.982	3.16767	101.883
62	16.4571	20.8096	3.64621	111.941
63	15.5417	20.689	3.72132	105.143
64	19.9594	25.2349	3.84882	84.182
65	17.1635	12.9844	3.33412	111.04
66	12.3865	13.0169	3.2431	97.053
67	20.7897	24.248	3.1845	115.797
68	14.6462	8.06991	3.61257	119.214
69	17.1108	15.4069	3.14839	118.598
70	20.3812	12.4113	3.52648	80.7016
71	9.93156	13.5811	3.219	95.9314
72	15.5305	7.4562	4.12861	124.256
73	12.2325	15.2673	4.17856	82.6408
74	17.933	13.3226	3.79982	137.739
75	18.9879	19.8277	3.1297	93.2698
76	14.4122	10.5921	3.28111	74.4703
77	12.3947	18.7015	3.18566	88.5572
78	7.07525	13.2247	3.58294	88.1651
79	20.6519	16.5027	3.61979	115.616
80	16.92	19.2741	3.25055	93.9551
81	18.3439	9.0957	3.60335	124.6
82	16.9779	13.0255	3.71647	105.111
83	17.4057	24.6454	3.47406	79.5242
84	21.6086	17.8144	3.8221	140.941
85	9.07673	15.071	3.14502	77.5536
86	12.8079	16.531	3.22893	119.92
87	15.8219	17.2961	3.83721	67.0872
88	14.8825	18.9565	3.04027	95.0112
89	19.9974	10.5429	3.09213	83.3423
90	9.98911	18.6828	3.44491	76.7277
91	11.1423	15.1745	2.72886	95.939
92	13.1997	12.196	3.59891	91.4925
93	20.3793	17.0312	4.3647	107.478
94	16.8521	16.8866	3.93736	110.319
95	16.5301	16.2892	3.71241	96.2893
96	16.3818	22.6632	3.76047	83.8056
97	18.1707	15.2763	3.31796	90.6062
98	13.2409	13.8699	3.26727	124.473
99	14.3035	18.4295	3.48332	98.2523
100	14.0801	8.71302	3.96294	85.3144
101	14.0015	16.409	3.15248	85.9648
102	22.2357	22.069	3.60909	110.507
103	14.77	11.9387	3.2263	106.056
104	16.6809	10.8881	3.21183	99.4
105	18.7859	15.8544	3.54565	97.7924
106	13.6121	20.9706	3.88765	107.381
107	16.9528	15.6913	3.59608	113.464
108	15.4571	17.0056	3.46387	118.445
109	16.1411	19.7178	4.10096	94.318
110	9.46918	19.1134	3.33767	108.937
111	9.92855	12.2801	3.73998	94.9273
112	15.1058	10.8513	3.57847	92.7347
113	14.3733	11.5848	3.15094	107.477
114	14.8799	14.6653	3.64591	56.1923
115	13.3216	12.558	2.90364	89.3693
116	11.6119	17.5348	3.82572	93.0143
117	13.3565	17.147	3.2607	82.0948
118	16.5276	20.3665	3.65084	74.8336
119	18.6243	17.7179	3.21953	98.0773
120	17.2422	13.7053	3.61147	96.9798
121	16.2222	14.221	3.49063	72.3215
122	10.5662	14.1601	3.44889	106.237
123	14.9126	20.8233	3.10382	83.141
124	23.4549	16.78	3.72279	96.4575
125	17.1899	22.2035	3.39867	112.643
126	20.9532	16.1191	3.37139	104.189
127	14.5385	15.0378	4.23453	138.615
128	18.2037	10.383	3.02329	95.4405
129	13.7597	18.6828	3.90565	129.632
130	12.1542	11.2546	4.38376	88.7948
131	11.6612	16.9571	3.44932	118.705
132	24.547	18.0597	3.55892	104.84
133	17.5157	12.9013	3.62787	88.3179
134	13.2779	20.0608	4.18065	98.0436
135	13.8106	10.0615	3.16424	126.198
136	20.1921	21.7101	3.69092	132.951
137	13.6626	11.1317	3.48734	82.1759
138	11.7122	13.0447	3.0925	93.5073
139	14.2526	18.5245	3.01836	114.926
140	14.8912	20.3342	3.15721	103.183
141	13.2081	21.7037	3.3315	96.3061
142	9.77538	15.4481	3.63239	105.075
143	15.27	17.083	3.07134	103.406
144	17.4485	18.9833	3.13804	89.971
145	12.1172	11.9617	3.8539	104.815
146	17.7755	19.9187	2.88608	132.142
147	18.567	15.2129	3.89349	108.013
148	16.4812	15.3675	3.73812	100.18
149	19.8086	15.3785	3.43168	105.363
150	12.8023	13.9646	3.82834	106.585
151	20.4038	16.2184	3.10474	77.8736
152	12.1284	16.2408	3.5188	79.3115
153	25.4502	17.8165	3.52241	83.4751
154	21.1192	9.87691	3.23519	92.9146
155	18.2155	9.20535	3.44032	107.496
156	14.8358	15.6243	4.40396	111.199
157	11.177	17.3077	3.66364	108.689
158	17.6683	11.6119	4.12959	88.1315
159	19.0177	15.4792	3.39711	87.1871
160	12.9871	8.94569	4.01986	70.6414
161	19.9621	14.7435	3.66	108.687
162	18.029	28.6639	3.85625	114.433
163	19.8864	15.261	4.06868	77.7018
164	9.0536	12.8222	3.27152	82.2332
165	25.7107	13.7497	3.56024	66.4059
166	15.5871	10.9187	4.16262	102.86
167	21.2791	23.913	3.26013	111.944
168	15.5658	13.8737	3.28906	92.7207
169	19.5938	23.8012	3.6579	119.484
170	17.8639	16.0139	3.73425	100.825
171	13.4971	11.1592	3.7867	118.052
172	12.9582	19.7881	3.46069	78.4851
173	17.3313	9.84058	3.51604	98.504
174	13.678	12.8772	3.74357	116.478
175	15.4585	15.7483	3.13542	93.9018
176	15.9416	14.7606	3.51954	89.4511
177	10.1079	19.9762	4.02041	99.3869
178	16.1949	18.7029	3.89398	119.341
179	12.2381	17.9758	3.36151	103.862
180	16.5789	11.3812	3.46622	120.93
181	10.775	15.1407	4.04888	112.917
182	19.527	16.6553	3.16622	89.8168
183	16.3317	17.5268	3.51649	127.968
184	24.4636	13.5487	3.52515	80.8649
185	19.9928	16.272	3.88503	93.7103
186	20.5377	17.6715	3.01697	69.9365
187	18.5432	16.749	2.94865	80.2986
188	17.8532	14.1704	3.17547	108.752
189	17.6472	22.7994	3.21303	108.606
190	17.8068	10.4596	3.20016	89.717
191	14.0228	23.0161	3.70964	84.0856
192	17.5454	9.27336	3.19707	86.1975
193	12.4637	17.7135	3.88904	88.9008
194	14.9646	13.6841	3.38856	95.9989
195	8.486	14.438	3.35468	90.6341
196	13.1527	15.011	3.5589	118.827
197	14.8122	9.23423	3.80129	60.0041
198	16.3003	22.1825	3.72153	74.3927
199	22.7987	21.3878	3.1258	131.109
200	9.32294	18.3701	3.48562	115.738
201	14.3351	18.2749	3.34215	146.168
202	18.8079	18.9997	3.59484	85.0974
203	14.0659	17.1322	3.57501	119.345
204	22.0656	14.7209	3.46939	106.575
205	15.7419	14.5644	2.81719	102.57
206	6.92303	16.9234	4.1568	105.194
207	9.1975	12.7027	4.23685	126.199
208	14.0274	12.3487	3.10592	94.7157
209	13.073	17.9653	3.31159	102.951
210	6.12384	17.3619	3.73894	107.475
211	20.1855	11.0849	3.55572	94.4131
212	14.5258	19.5725	3.36058	67.6115
213	15.8812	14.1235	2.96295	118.297
214	15.3034	19.6346	3.17811	97.7045
215	22.0638	14.9128	2.87816	123.137
216	19.8792	14.4622	3.54372	102.315
217	18.4901	13.9719	4.23866	101.769
218	10.3654	15.1484	3.25039	88.3799
219	16.4332	15.8813	3.17914	88.873
220	12.9566	15.7126	3.25446	90.4254
221	19.2211	11.9247	3.36661	106.026
222	12.0349	11.9404	2.92158	105.913
223	9.48981	9.47503	4.12537	105.73
224	14.1429	20.7494	3.27591	131.515
225	18.4837	18.3184	3.82727	90.5863
226	6.57096	22.2783	2.85362	89.5664
227	13.1546	8.61244	3.5581	87.6031
228	10.5546	15.2586	3.63076	94.7657
229	20.4473	23.16	3.1553	67.1617
230	13.8777	18.2945	3.89817	89.228
231	24.332	16.9898	3.47776	113.308
232	19.9435	16.1654	3.61778	113.165
233	19.0746	11.6267	3.56789	101.386
234	20.4145	23.494	3.41252	121.558
235	16.2176	11.4882	3.43085	135.99
236	25.2647	16.6995	3.77709	97.837
237	13.3311	31.1472	3.33105	111.683
238	20.0726	12.4902	3.88831	104.011
239	13.0794	14.8388	3.39119	135.457
240	14.8462	13.7872	3.91121	78.0348
241	14.9796	11.2916	2.83322	120.152
242	17.3066	15.1033	3.60296	82.9623
243	20.5385	13.1209	3.57254	74.5754
244	22.9847	19.2928	4.07996	107.382
245	16.0731	18.8835	3.57218	93.4101
246	19.79	17.9533	3.33554	109.066
247	14.319	22.7143	3.47298	124.591
248	26.0223	11.1692	3.29276	83.9387
249	11.2586	8.91454	2.54747	131.209
250	14.2446	13.5999	4.04355	93.5706
251	20.0936	19.4207	3.80175	87.6787
252	28.8898	23.7364	3.4431	80.0281
253	10.8528	17.3482	3.70781	103.973
254	13.5687	24.4283	3.56966	112.173
255	19.7627	16.1073	3.51186	85.5681
256	18.7942	21.9258	3.14459	79.7731
257	16.2176	13.138	3.25862	98.3709
258	7.11068	15.4467	3.65737	103.947
259	22.8278	9.83133	3.88933	79.1238
260	12.4114	5.95996	3.53211	73.8053
261	17.5641	8.55351	3.51332	69.7727
262	13.0332	25.4637	3.90133	125.109
263	12.7298	17.3918	3.29234	103.482
264	17.3413	15.6368	3.81255	77.0517
265	9.21033	12.5032	3.56221	70.0657
266	18.9549	19.965	2.95609	144.038
267	19.0517	16.9522	3.54267	94.0487
268	16.3339	20.5822	3.50989	105.864
269	17.1687	14.5403	3.76825	96.5772
270	18.6271	17.1983	3.47942	92.5421
271	8.9239	17.6248	3.58423	105.738
272	17.7995	20.0034	3.45148	88.0829
273	14.138	13.7151	3.70506	94.157
274	16.4636	12.7621	3.46746	112.28
275	19.2608	18.5767	3.63914	106.716
276	7.37397	14.465	3.64402	126.902
277	16.4676	9.6103	3.23927	93.4029
278	19.4607	20.0716	3.69806	84.5613
279	20.7699	11.3457	2.71128	122.281
280	19.9503	14.3206	3.76612	115.299
281	24.3943	15.1643	3.00502	94.0122
282	18.5478	9.44272	4.68226	100.976
283	21.3642	22.197	3.58792	112.357
284	16.7669	12.128	3.10849	130.76
285	16.6045	18.3592	3.52356	97.1433
286	16.1904	19.5545	3.64965	83.4673
287	10.0087	20.4422	3.43341	93.1191
288	14.6252	22.2458	3.74808	69.5127
289	16.9147	17.0837	3.89167	92.735
290	9.45503	12.5711	4.01963	102.58
291	15.8967	11.551	3.91334	111.029
292	12.7232	15.9904	3.44624	96.0429
293	11.3068	16.0553	3.7431	100.035
294	10.7939	19.8186	3.5661	87.4584
295	15.2228	15.4156	3.01614	92.0678
296	14.4889	14.1116	3.61407	99.8713
297	24.4564	13.2485	3.48124	84.6303
298	13.2503	17.2571	3.40972	120.646
299	12.873	10.362	4.25893	87.8158
300	20.6328	23.1947	3.46005	87.852
301	20.9481	9.59012	3.69352	114.407
302	20.2667	21.2411	3.5114	136.594
303	17.1691	20.6954	3.07902	109.688
304	21.2197	19.6918	4.50389	84.1233
305	13.9804	10.208	3.78296	73.915
306	14.1344	13.7246	3.57767	100.346
307	19.1614	7.58749	3.54975	106.854
308	15.8591	20.4537	3.57861	93.6861
309	10.4864	20.0551	3.35036	86.0914
310	14.1501	16.1321	3.64331	83.7038
311	13.1843	15.3931	3.34729	120.406
312	13.1014	18.5885	2.95116	92.5086
313	23.0871	12.8267	3.5888	112.29
314	12.3098	16.9615	3.81883	105.721
315	13.598	15.0066	3.262	106.314
316	14.1465	13.5167	3.89725	96.6157
317	15.4466	18.0843	3.77211	114.979
318	14.5261	12.1473	3.65568	55.6992
319	13.036	11.6747	3.11645	102.458
320	19.0352	14.2312	3.52134	127.508
321	15.7727	16.9475	3.888	88.9406
322	9.93027	10.5225	3.58827	96.8252
323	18.814	29.4918	3.66242	97.3568
324	13.2932	9.93323	3.69992	99.929
325	20.3183	12.8101	3.57654	61.1254
326	10.1635	14.6484	3.8438	99.6163
327	14.0949	7.98486	3.23781	102.097
328	15.7316	22.589	3.85436	88.771
329	8.67234	9.35988	3.94952	117.702
330	15.6635	22.3267	3.43778	85.7922
331	15.3542	19.174	3.84733	97.1971
332	20.2963	16.1755	3.66219	111.714
333	19.0541	17.6757	4.06456	85.6674
334	17.4687	13.7686	3.40167	110.497
335	20.0664	22.7643	3.17871	114.267
336	15.9051	18.6621	3.82805	74.0803
337	14.7175	21.4772	3.09386	136.187
338	13.8449	16.6253	4.04729	89.49
339	16.5785	15.7398	3.40249	97.5126
340	17.9042	16.5533	3.03186	114.489
341	16.0625	20.889	3.11978	75.931
342	15.0249	20.1091	3.51885	101.525
343	19.6323	18.4509	3.70341	104.599
344	23.7394	13.878	3.65777	101.465
345	23.8411	21.1371	3.93442	76.7834
346	16.4956	20.6475	3.29009	76.8754
347	10.8333	17.4007	3.62469	85.4408
348	17.484	19.5434	3.30622	70.1274
349	19.5261	15.6867	3.83544	124.673
350	14.1847	23.8166	3.61351	86.8162
351	14.49	7.62853	3.13941	99.1673
352	12.142	10.9806	3.28475	60.2787
353	12.6102	14.6873	3.6828	98.3074
354	11.4957	6.86703	3.90558	83.4687
355	15.6077	21.3301	3.06093	72.3806
356	9.17463	16.2037	4.06338	100.706
357	14.0741	13.0318	3.51138	111.133
358	12.0054	15.9525	3.60249	84.658
359	17.7831	15.6094	3.63125	102.327
360	17.0171	9.52732	4.20629	96.6122
361	15.9995	16.1588	3.94351	116.492
362	12.7317	17.6146	3.82266	97.0002
363	15.1909	9.46013	3.74634	89.2394
364	11.4912	13.7892	3.96179	91.4966
365	19.3664	13.6948	3.37854	114.525
366	26.2047	10.9505	3.72459	103.037
367	14.8077	10.8386	3.70216	143.381
368	13.4072	12.8012	3.27627	111.097
369	23.3612	17.2475	3.9422	141.429
370	11.9165	14.2373	4.19646	56.8214
371	15.5873	17.9842	3.75831	111.967
372	14.1076	11.7175	3.19347	114.307
373	13.3115	15.3086	3.37059	104.912
374	11.5805	22.5911	3.82786	58.6172
375	21.5233	21.0717	3.46559	117.881
376	15.1236	20.0771	3.56951	119.523
377	16.5008	9.98738	4.4342	70.396
378	18.0346	17.3441	3.73541	71.1046
379	13.9847	9.72186	3.63705	116.81
380	20.7713	10.698	3.49745	102.728
381	23.8604	8.71176	3.23436	62.8577
382	18.7201	16.7592	3.504	123.29
383	15.1778	26.0577	3.36727	99.7443
384	14.2458	13.4893	3.36454	113.286
385	25.5297	10.052	3.77546	96.6431
386	16.5633	10.3029	3.04627	99.7983
387	13.4481	14.9943	4.05421	126.254
388	17.223	20.0395	3.79846	103.451
389	13.4096	12.7837	3.53121	97.5695
390	16.8201	19.4596	3.85829	76.836
391	11.6542	16.9875	4.04645	94.7605
392	19.6464	14.259	3.66038	93.1804
393	17.8212	19.5307	3.71615	100.376
394	16.4733	15.1839	3.11103	85.4628
395	17.1997	21.4364	3.13613	97.9927
396	13.6884	22.3808	3.04597	111.437
397	14.6709	12.3673	3.77545	89.264
398	15.23	11.6653	3.85695	103.126
399	15.1738	22.3973	3.7067	126.64
400	17.45	17.7368	3.52368	102.326
401	19.3139	13.7542	3.38473	109.864
402	15.4348	13.5353	3.92204	79.5748
403	17.2316	16.8866	3.91868	118.307
404	18.1386	9.42406	3.51417	127.985
405	16.9282	10.5493	3.48762	128.411
406	9.30908	14.8963	3.53077	82.3121
407	15.8645	9.22555	3.21014	99.9005
408	16.8056	20.6212	4.15199	86.8128
409	17.7752	21.0617	3.28358	95.8749
410	6.30323	14.0325	3.31391	81.2559
411	16.6792	18.5248	3.57236	98.1205
412	17.2298	23.7748	4.83088	74.7166
413	12.2148	9.98898	3.19566	116.442
414	13.8364	11.568	4.13908	118.206
415	17.4431	12.1664	4.39295	101.078
416	15.134	16.6769	2.67578	92.2147
417	16.7378	16.5557	4.13226	69.3945
418	10.2264	12.3725	3.49522	83.3674
419	18.5926	14.9007	3.82889	111.901
420	19.7643	11.9266	3.62975	76.4864
421	15.6379	13.4831	3.47799	90.8862
422	20.9434	9.7776	3.11717	97.9698
423	11.5234	15.8495	3.57384	95.4274
424	21.9313	15.8719	3.72336	112.635
425	19.1866	16.7165	4.08038	62.2217
426	15.1281	16.8177	3.45966	78.9345
427	15.1436	20.7194	3.03486	72.7591
428	10.4948	15.4667	3.42671	122.695
429	18.043	22.2278	3.82903	119.643
430	17.4045	20.0116	3.09764	130.305
431	13.9997	10.3159	3.48535	102.184
432	21.6309	13.3579	3.01758	94.2525
433	16.9761	9.20529	3.77176	111.555
434	18.9656	10.1443	3.21884	123.429
435	20.7588	11.4612	4.57095	121.493
436	13.0841	15.0437	3.40681	92.3213
437	11.4692	9.17437	3.75345	118.142
438	13.706	7.51576	4.12508	84.9285
439	15.0674	11.5737	3.24585	93.1432
440	11.7007	16.9278	3.1697	79.2868
441	13.457	11.6325	4.11748	104.03
442	21.7622	14.8043	3.87072	94.5043
443	15.2213	16.0396	2.73181	102.192
444	26.38	18.7844	3.60011	93.9555
445	10.9065	22.6741	3.84657	107.839
446	17.7162	14.1502	3.62453	80.9218
447	18.3204	20.8413	3.41426	86.9181
448	15.1855	9.37006	2.62435	126.495
449	10.5762	9.41393	2.84	143.667
450	18.1256	11.8261	3.33197	100.387
451	13.9618	9.50458	3.70425	99.8356
452	12.5664	8.50457	2.90533	123.069
453	20.9324	17.4816	3.56086	112.347
454	16.1815	15.6005	3.16441	108.998
455	16.113	13.6443	3.49212	105.178
456	15.9029	14.2672	3.61168	106.996
457	14.7997	22.122	3.56426	92.8926
458	19.9667	9.57415	3.71377	82.1876
459	19.9085	28.8449	3.57164	78.9068
460	17.0751	6.06064	3.82332	115.694
461	18.6747	14.4176	3.49979	99.442
462	17.485	8.78341	3.66055	110.194
463	9.43852	18.358	2.71564	120.412
464	11.3871	11.1783	2.58117	85.1219
465	14.7153	20.4188	2.85438	73.413
466	11.265	18.7537	2.80725	89.0402
467	13.4014	14.617	3.12576	119.773
468	22.8504	13.034	3.91643	50.0039
469	22.2118	13.3382	3.12473	90.0602
470	19.5897	18.4854	2.99297	78.6715
471	18.1431	11.8662	3.54649	95.6426
472	11.918	9.38809	3.24471	101.518
473	14.6219	7.43202	2.70859	103.482
474	14.7547	20.2174	3.33506	112.041
475	21.0024	15.5768	4.40447	72.9305
476	10.2716	15.8674	3.28262	95.8454
477	19.3668	16.2125	2.96787	103.824
478	19.6636	11.0499	3.50408	119.724
479	17.6611	22.4165	3.58311	107.42
480	14.4126	19.4944	3.35242	100.342
481	17.5159	17.101	2.71537	87.0706
482	14.3422	16.8502	3.47031	137.059
483	15.2967	16.909	3.19066	112.377
484	15.0698	8.62508	4.06462	101.753
485	13.9235	19.232	3.75443	95.6462
486	27.4018	21.9163	3.81333	84.2898
487	9.76389	17.5355	2.55172	96.9517
488	24.0972	13.5935	2.87438	97.5631
489	19.5831	16.4498	3.50914	114.774
490	22.4458	22.1376	3.35574	118.498
491	13.9877	16.1462	3.63333	112.148
492	16.5316	12.7485	3.47649	100.357
493	17.9632	19.7912	3.18089	96.1999
494	21.6562	14.2412	3.8911	108.361
495	18.9755	13.5865	3.93013	88.0068
496	13.4363	12.5253	2.89961	78.4582
497	18.0449	12.0297	3.75295	101.695
498	13.3881	13.1911	3.30632	111.978
499	14.2195	13.555	3.79405	118.822
500	17.3167	21.7889	4.03816	133.173
501	20.2059	18.0894	3.34406	105.054
502	16.6323	22.1998	4.04581	91.3495
503	11.7342	9.90293	3.65484	103.898
504	13.9264	10.4317	3.44748	127.201
505	15.4343	15.3677	3.39409	92.9301
506	17.4044	18.9183	3.22474	132.517
507	17.5541	15.4105	2.86897	117.821
508	13.6711	7.08774	3.20099	82.8689
509	23.2454	24.7708	3.57227	112.594
510	16.7461	16.4587	4.06802	96.8152
511	15.2578	15.8853	3.77057	82.8435
512	18.9999	28.3081	3.02356	79.1754
513	12.8802	21.2496	3.84872	60.2651
514	18.2108	13.8989	2.83717	114.442
515	14.9979	16.1405	3.88192	99.2048
516	12.4685	17.435	3.22552	97.4288
517	12.6791	11.1161	3.32084	106.198
518	17.2552	13.9773	3.7945	89.3109
519	18.3723	10.1422	3.59845	118.318
520	13.8502	21.115	4.1215	63.8468
521	12.5397	25.4561	3.47447	90.6594
522	11.3188	9.67465	3.64308	99.1711
523	18.9519	8.04601	3.57505	104.054
524	27.5954	19.7301	3.9582	66.7016
525	18.448	19.3831	4.15974	64.3739
526	14.5065	13.4285	3.37832	81.2583
527	12.2294	14.5855	3.57327	91.7736
528	16.7736	19.9072	3.97752	122.848
529	16.365	13.0605	3.72995	56.8949
530	17.0873	6.63463	4.08224	92.7065
531	20.7876	15.8472	3.64286	126.076
532	15.0089	16.1198	3.00967	86.6919
533	17.6524	14.5141	4.05385	111.375
534	15.5107	15.3019	3.60325	92.1212
535	24.3206	22.8561	2.99294	97.431
536	12.8346	20.3574	3.88173	160.159
537	14.4954	13.685	3.99706	110.486
538	12.325	20.0762	3.66416	123.799
539	16.2582	15.0757	3.26999	136.495
540	21.0363	18.7067	3.3449	79.5068
541	16.5749	16.9672	3.518	101.008
542	20.8355	14.3055	3.03108	88.9645
543	13.4052	16.1795	4.17632	124.358
544	25.8738	17.8834	3.64512	116.815
545	18.0301	18.0616	3.78358	83.1176
546	16.9288	12.4256	3.70254	55.2358
547	16.32	14.7103	3.41164	97.3945
548	20.2718	19.003	3.59722	94.4761
549	18.3092	14.8821	3.12392	89.1603
550	16.4496	17.2413	3.74077	86.3666
551	20.4093	14.1132	3.66648	90.507
552	13.813	13.9104	3.0159	77.3876
553	19.6518	12.3966	3.39988	107.042
554	13.2249	8.70449	3.75119	92.6685
555	10.2045	23.1338	3.04095	97.3986
556	15.7781	8.3911	3.32026	101.124
557	15.4307	19.339	3.45197	93.2966
558	15.8804	12.6454	3.51811	149.667
559	13.6925	23.4368	3.34029	71.9427
560	18.916	18.5371	3.64439	94.4532
561	13.5854	5.94872	3.54414	112.975
562	12.9315	11.8859	2.96221	72.6481
563	18.9193	14.9406	3.15099	106.257
564	19.2481	15.7783	3.76834	110.527
565	13.5106	9.47798	3.12207	95.9246
566	18.8479	10.8952	3.72341	111.011
567	9.50151	18.1178	3.74488	118.812
568	15.3071	18.6643	3.56697	114.52
569	17.2568	14.8838	2.50612	81.9361
570	16.6019	16.4971	4.23691	92.1636
571	8.25257	13.2861	3.38443	107.663
572	19.7424	8.16248	3.21734	76.691
573	18.7029	18.4787	2.95293	75.8296
574	14.7898	12.1363	3.63672	103.135
575	18.8359	7.35989	3.67507	89.4689
576	14.2941	13.0557	3.0986	98.167
577	14.4197	21.7089	3.57431	101.838
578	13.1136	9.17867	3.73553	90.2313
579	16.0437	23.0284	3.49664	83.1792
580	17.2161	16.4416	4.25642	120.48
581	14.7231	10.5484	4.24178	72.4338
582	14.9602	14.2415	3.5483	109.134
583	20.268	13.7547	4.02122	70.6291
584	16.241	12.7583	3.65349	103.842
585	25.8786	20.1077	2.64605	101.217
586	14.3307	17.02	3.61553	77.7932
587	17.4849	19.0251	3.31463	120.733
588	12.2391	25.5137	3.32753	79.4202
589	18.2605	17.9243	3.65357	141.427
590	19.9093	15.9955	3.73054	86.7175
591	21.3025	7.47198	3.25258	116.65
592	24.4555	16.6335	3.39517	90.0178
593	11.3636	17.1179	3.05515	114.762
594	20.5693	9.9701	4.00984	129.982
595	24.0238	11.5564	3.60144	93.1344
596	16.9137	11.6505	3.51796	74.1281
597	13.3565	19.7976	3.93908	100.092
598	18.3934	16.5744	3.46933	94.2676
599	15.5435	15.892	3.46211	84.6025
600	19.6597	11.0855	3.61445	113.576
601	13.3423	17.8935	3.65979	135.542
602	20.5167	15.0052	3.99318	128.89
603	10.3854	16.7582	3.12526	91.0047
604	19.8209	9.89957	3.88844	120.405
605	16.8827	22.0209	3.44355	88.7125
606	9.81973	14.9001	2.78784	88.2163
607	25.2931	11.9527	3.31741	123.398
608	24.101	21.2277	3.62475	79.9275
609	21.2396	14.7928	3.43407	112.165
610	14.5863	16.1218	3.93158	87.5909
611	15.9706	14.6083	3.76389	95.132
612	22.2766	17.0976	3.6048	106.038
613	12.212	14.4195	3.02546	132.31
614	22.7141	18.1816	2.89473	74.9699
615	16.3668	16.6551	3.5416	102.123
616	18.2788	17.8999	3.58916	103.965
617	13.5137	11.5425	3.76652	93.3698
618	14.2153	9.60414	2.88778	108.343
619	8.90729	11.2837	3.26758	132.748
620	18.0924	8.42694	3.54165	104.27
621	18.0433	17.4921	3.2078	93.4031
622	12.6462	19.4199	3.97577	88.8735
623	19.9575	9.54507	3.80065	102.232
624	15.7157	9.93509	3.25225	121.306
625	16.926	18.5377	3.66571	129.883
626	17.7852	20.514	3.48934	85.5987
627	21.0915	11.7382	3.563	128.715
628	11.5605	15.6076	3.75131	93.838
629	11.3773	21.4043	3.6934	93.3688
630	21.5305	16.3086	4.12138	72.6802
631	16.6569	16.6372	3.30472	54.7756
632	10.4499	10.8064	3.29751	89.0074
633	19.2755	20.4898	3.07305	77.8049
634	15.7643	14.9326	3.70535	107.065
635	14.5398	16.8991	4.11081	122.856
636	21.9936	11.877	3.41672	66.3591
637	12.3599	16.6575	2.87872	134.676
638	8.67259	13.0036	3.389	56.7217
639	10.5012	20.608	3.73237	132.397
640	16.2722	9.53397	3.91256	92.0231
641	13.731	13.4895	3.81523	125.648
642	17.7928	10.3637	3.92722	99.0561
643	20.1393	11.6118	2.99051	119.043
644	22.6791	15.1535	3.68026	77.6713
645	13.2168	15.8593	4.09957	84.9928
646	16.3735	12.5174	3.33889	105.803
647	20.7749	17.928	3.74115	96.6359
648	17.3776	12.1329	3.07156	103.43
649	16.0916	21.8812	3.34278	93.477
650	11.4493	11.6244	3.10334	87.4553
651	19.0162	18.2645	3.62955	118.493
652	11.0253	16.0802	3.72437	80.0652
653	18.4372	15.2855	2.81306	78.4198
654	13.1303	18.5129	4.15215	97.0229
655	13.8191	20.6477	4.22447	97.7205
656	14.1414	19.8581	3.23269	101.037
657	19.8684	14.6476	3.40058	99.9251
658	19.7656	22.0859	3.67613	99.6949
659	16.3498	24.8061	3.23036	123.874
660	14.2805	18.4187	3.68689	107.155
661	24.8652	12.1086	4.22035	111.973
662	10.6456	6.96952	3.44121	142.263
663	18.8854	10.9756	3.03151	70.4779
664	16.3102	11.2932	3.35598	110.648
665	17.9042	16.8841	3.62515	92.7204
666	17.1057	16.7121	3.62398	111.862
667	16.4261	18.6412	3.55507	70.5213
668	16.0681	13.3369	3.73636	81.5408
669	16.1827	16.2205	3.4308	74.1153
670	15.328	21.2648	3.83335	106.742
671	14.6937	19.0628	3.28948	76.5879
672	16.8612	16.8766	3.68801	96.2507
673	13.8355	17.8706	4.11528	93.4105
674	16.2686	10.6636	3.52126	82.1896
675	19.9258	12.3848	3.36296	100.034
676	16.9443	12.0144	3.62881	87.2253
677	8.11688	11.6169	3.96189	80.5529
678	16.3922	14.6959	3.41884	85.761
679	17.9253	10.7518	2.77189	87.0114
680	12.7259	23.4006	3.53278	83.7882
681	13.5147	13.5009	2.93784	124.36
682	15.1486	13.852	3.96964	129.623
683	23.7647	19.4234	3.30309	113.455
684	18.2972	13.7404	3.82062	74.3329
685	15.7947	9.58694	3.63823	101.925
686	15.5827	14.0448	3.44337	102.985
687	15.0972	17.8406	3.14035	101.348
688	13.4955	8.73076	3.38178	80.2561
689	23.4399	15.7071	3.59051	75.803
690	16.5637	19.2147	2.96669	128.012
691	14.9582	14.9321	3.76591	84.213
692	21.8226	8.86946	3.42453	119.292
693	14.7318	19.8241	3.12991	120.331
694	20.0478	11.286	3.07537	80.4103
695	17.7156	22.6908	3.43907	109.157
696	22.4639	16.1238	3.36851	125.655
697	15.9652	16.0203	3.87269	93.4487
698	18.4887	13.7845	3.08561	102.729
699	11.4932	13.3239	3.81611	80.6629
700	20.3909	22.4543	3.9348	91.0871
701	15.0884	14.5199	3.37248	94.8167
702	20.1274	14.0882	3.9728	113.212
703	9.49454	22.3684	3.72783	95.0805
704	22.2626	21.2284	3.29092	96.975
705	15.6434	18.1927	4.2739	72.8159
706	16.974	15.1597	3.60555	121.276
707	15.5982	13.4324	3.98768	106.132
708	15.9009	16.6054	3.28454	84.4835
709	21.1679	10.7526	3.42734	104.841
710	16.2195	10.6658	3.16497	89.8626
711	18.3957	23.1875	3.76595	115.9
712	18.9017	14.2727	2.76071	100.96
713	13.37	10.5597	3.22927	115.825
714	24.1233	15.3507	3.88562	88.8008
715	20.4512	12.2745	3.73244	97.021
716	12.5897	23.774	3.50926	98.4611
717	13.7765	14.732	3.20387	90.9387
718	10.0736	12.8826	3.17685	61.9237
719	13.5913	6.82534	3.22238	90.3288
720	16.3682	12.4343	4.05141	94.1065
721	24.6141	14.3015	2.84359	75.6111
722	17.2006	8.58945	4.37354	103.182
723	15.752	21.6472	3.43397	106.573
724	15.3202	19.0496	3.86852	105.377
725	11.0745	8.30981	3.06019	106.083
726	18.5497	16.3592	3.96368	107.391
727	20.6805	17.8654	2.91539	113.9
728	21.0396	18.9644	3.66554	108.839
729	13.0972	18.5994	4.09669	98.7977
730	12.636	7.82485	3.67558	106.862
731	20.8463	18.4071	3.74295	92.6801
732	14.3846	21.0054	4.12597	128.633
733	10.676	12.355	3.13749	110.092
734	20.3333	9.64029	3.55493	125.712
735	14.5607	14.8931	3.21823	70.9363
736	18.2183	13.6428	2.80067	94.4037
737	18.4324	16.4722	3.67191	106.455
738	18.4105	16.3917	4.24577	75.7946
739	15.1372	15.3111	3.54053	119.391
740	11.3517	16.7662	3.49252	88.6992
741	13.9185	7.53925	3.61084	117.926
742	10.1264	16.2848	3.66462	72.6324
743	15.0669	18.6726	4.10874	124.716
744	9.98844	14.4751	3.10181	77.2576
745	14.5509	11.1319	3.38723	76.8651
746	16.3941	14.6337	3.56584	134.044
747	22.4509	14.6967	4.24463	108.372
748	12.7612	18.1807	2.98723	107.441
749	17.3032	18.4961	3.61339	101.671
750	20.02	18.4982	3.9504	81.0851
751	21.5542	21.5327	3.40753	118.582
752	15.6734	18.769	3.64827	124.277
753	9.34937	19.3094	3.20933	96.5761
754	8.92794	14.0665	2.9807	88.7834
755	15.1987	20.3849	3.216	92.6765
756	23.9986	14.521	3.05126	127.757
757	17.5054	13.5166	3.36666	99.0018
758	15.3609	20.6185	3.19322	114.903
759	12.5197	18.2256	3.40569	84.8149
760	12.422	11.7905	3.80349	111.745
761	18.9533	13.7416	3.0744	109.219
762	12.9207	11.6008	2.92149	109.123
763	9.38941	14.5993	3.42251	118.472
764	13.4615	10.0613	3.67875	83.9898
765	23.1442	21.7185	3.83731	98.479
766	14.8098	12.766	3.23443	132.386
767	20.8666	9.02179	3.01042	114.479
768	15.6829	15.2591	3.80747	90.4494
769	13.9568	22.0473	3.73452	120.856
770	18.6386	16.188	3.3623	110.574
771	14.0047	18.2913	3.39815	84.9824
772	13.2192	20.4699	3.39013	90.0994
773	8.41196	15.8326	3.45262	83.3512
774	14.8892	18.6588	3.29594	91.0725
775	13.2983	17.0336	3.48483	102.748
776	14.5262	9.8316	4.10218	108.008
777	18.6656	9.8123	3.78295	138.246
778	18.098	19.7154	3.15482	94.3397
779	20.7608	13.1773	3.83138	99.8042
780	18.8402	13.1178	3.25087	80.0216
781	11.6262	13.3702	3.79217	67.9842
782	12.9967	23.6761	3.40418	113.855
783	17.0646	15.7929	2.9488	130.852
784	17.7621	18.811	3.29624	110.983
785	14.225	7.84833	3.797	96.7749
786	20.6205	17.2567	3.57075	104.569
787	8.83637	13.1821	3.19917	75.6179
788	16.6201	9.1943	3.32976	106.55
789	16.6693	14.9528	3.36004	97.3429
790	18.239	16.3287	3.58284	85.7307
791	12.1753	21.8124	3.41953	93.3607
792	11.6472	9.51543	3.88581	94.1948
793	14.6559	21.5541	3.30302	106.245
794	9.28797	17.7901	3.56261	88.1967
795	11.0702	20.956	3.05388	96.2402
796	15.3859	20.8347	3.62227	109.021
797	16.5668	8.81279	3.68747	115.31
798	16.8024	11.9192	3.94987	103.934
799	13.86	24.0239	2.71278	84.1678
800	17.322	18.8153	3.65119	102.069
801	11.1833	20.0456	3.87604	139.227
802	8.64358	16.7568	3.16294	89.7542
803	14.6211	11.6925	2.92871	121.432
804	12.1239	13.5786	3.17088	83.8251
805	15.0564	13.7723	3.33192	99.9
806	17.3436	16.2797	3.34291	112.981
807	12.9223	20.0809	3.44838	121.04
808	20.034	14.638	3.73997	78.3164
809	21.1589	27.1433	4.10669	123.193
810	17.285	7.85674	3.47262	104.08
811	8.68389	14.5185	3.5864	120.412
812	16.7793	9.82435	2.86342	72.4639
813	15.1036	14.7633	3.80241	133.925
814	17.5079	12.7323	4.13917	107.081
815	13.242	17.694	3.18063	114.32
816	17.0268	18.2817	3.07566	62.9631
817	22.671	16.047	3.11795	113.681
818	16.3945	17.6934	3.44946	69.5137
819	15.8696	17.5578	3.19926	115.241
820	14.806	20.3849	3.22946	85.6139
821	20.0918	15.2931	3.61243	104.747
822	14.9785	25.5884	3.8084	81.6528
823	17.6525	17.2854	3.84399	91.786
824	17.7706	13.5705	3.91124	80.6706
825	16.9952	17.0564	4.26398	58.6928
826	16.9298	10.8527	3.09691	104.567
827	21.5657	10.4517	3.47293	72.2932
828	15.0241	12.2551	3.78553	102.446
829	23.695	17.2208	3.33971	116.429
830	18.0372	14.153	3.91515	85.0202
831	18.2432	21.3202	3.87779	128.369
832	19.8547	21.341	4.18609	95.8071
833	9.25822	14.5407	4.19044	66.7247
834	16.5998	10.2526	3.59523	78.4364
835	17.7207	23.4131	3.95609	76.1617
836	15.1041	21.453	3.70476	134.858
837	10.9289	9.15255	3.47725	168.237
838	13.5943	9.5407	3.19955	109.734
839	18.1195	16.5808	3.81341	150.275
840	20.5685	9.09414	3.48599	110.434
841	17.9741	7.87859	3.64573	87.1158
842	12.7396	12.4751	3.86908	102.109
843	22.9859	13.2025	2.41039	89.8561
844	12.2144	15.7222	2.8817	94.1504
845	16.3623	23.2158	3.56651	103.649
846	22.7836	19.3209	3.89824	101.325
847	21.1016	20.7793	3.20373	126.514
848	16.8432	15.9596	3.43378	132.021
849	18.254	17.9063	3.54519	68.0313
850	14.6153	11.4841	3.96882	113.341
851	11.3901	13.4354	3.36374	69.7532
852	16.1857	18.2862	3.89235	109.045
853	15.9626	14.5937	3.10517	130.419
854	16.2595	10.4566	3.86611	105.159
855	17.1735	21.7276	3.62134	77.5995
856	18.4305	21.8234	3.8686	69.7031
857	15.2513	15.6744	3.17336	118.534
858	19.0986	16.617	3.82146	108.865
859	15.5733	11.168	3.46654	114.82
860	11.9289	11.5584	3.08197	115.64
861	13.6842	16.9754	3.74813	100.827
862	18.5017	18.888	3.15582	119.046
863	10.1693	20.4769	3.55814	141.686
864	9.90713	20.9577	3.74999	124.913
865	10.8516	17.2705	3.05878	66.1645
866	12.8041	10.1138	3.59001	84.9864
867	12.2228	20.3356	3.98322	125.802
868	17.0181	22.0449	3.62626	82.6017
869	18.7792	21.032	3.69942	92.2818
870	14.6977	21.7842	3.11258	105.645
871	20.9565	16.0746	4.09296	96.7277
872	10.6379	11.3403	3.44127	68.4411
873	13.6059	20.4987	2.85967	98.7075
874	15.4922	12.9808	3.26566	104.63
875	24.7295	8.75253	3.81642	103.759
876	16.4728	12.6368	2.9362	99.422
877	21.3312	9.91843	3.9523	83.7748
878	16.7416	9.11764	3.42765	100.477
879	11.0204	10.1968	3.39699	103.999
880	12.6537	11.2825	3.52609	101.717
881	16.3843	22.9671	3.27151	92.809
882	12.2576	22.1848	3.73433	59.9561
883	13.5821	17.2076	3.95302	126.139
884	18.3489	11.2704	2.79299	98.9483
885	13.6753	22.7984	3.49753	67.5817
886	28.2022	18.0356	3.56358	63.6504
887	18.6197	19.6926	3.72628	90.3739
888	20.5305	18.8365	2.99238	119.142
889	16.8128	21.7623	3.03928	105.472
890	29.0967	16.065	3.53007	109.836
891	25.6166	9.5133	3.57364	110.571
892	19.0088	17.8936	3.43699	96.5865
893	6.32271	22.0034	4.02955	108.093
894	14.9832	19.7336	3.49309	97.5446
895	20.69	11.0521	3.3709	93.7855
896	18.6178	24.2389	2.82276	87.7666
897	16.6933	12.9777	4.24228	68.4397
898	17.1672	11.0719	3.55915	127.661
899	14.4976	23.6691	3.26601	112.429
900	14.524	20.3402	3.12751	105.696
901	13.8786	16.3991	3.58385	119.429
902	14.4577	15.0462	3.01848	70.2519
903	18.3371	17.8215	3.70667	103.052
904	15.7035	20.0413	3.28294	69.1305
905	17.6777	16.6888	3.28953	96.5029
906	17.0336	19.7528	3.73282	141.845
907	15.7109	19.0889	3.37386	115.637
908	11.3979	17.7032	3.08289	91.9406
909	13.2683	14.721	3.9433	93.878
910	16.4498	17.2235	3.31542	79.1198
911	14.8925	22.1826	3.13433	108.174
912	18.4223	14.2357	3.71421	100.28
913	24.9647	14.1416	3.43631	101.676
914	17.5493	16.0899	4.10137	80.8128
915	16.0823	8.88569	3.28651	107.197
916	19.1478	11.8288	3.25651	119.587
917	8.00951	12.0255	2.69066	104.175
918	15.3531	23.5241	2.88384	95.5841
919	11.7551	15.1769	3.07917	107.089
920	13.4231	21.6394	3.76305	81.1196
921	19.9878	10.9794	3.39802	93.5847
922	11.3233	18.1159	3.59915	93.9723
923	15.4276	9.24464	3.97746	98.3126
924	15.5425	15.0872	3.83656	121.185
925	6.2945	16.273	3.20491	115.346
926	11.4915	19.6936	3.96418	107.914
927	9.05428	18.3982	3.40547	107.693
928	19.6242	15.9809	3.01001	98.6598
929	20.7009	8.81589	3.52987	91.2159
930	11.9467	22.554	4.11399	85.3358
931	12.5922	20.9236	3.19015	99.3612
932	16.9883	14.7383	3.75595	101.21
933	17.9571	19.2156	2.80022	117.439
934	16.8235	25.2518	2.85937	85.9004
935	13.8476	12.5056	3.11422	97.6278
936	13.4644	17.5716	3.13876	119.414
937	23.415	8.30261	3.69507	96.9169
938	22.9122	10.1127	3.69765	79.0364
939	25.9522	19.735	3.33312	90.3216
940	17.0487	7.74209	4.3437	100.472
941	16.964	15.3293	3.71546	101.469
942	12.7375	18.593	3.67146	106.009
943	13.5275	19.5061	2.88482	69.1459
944	16.5779	16.6258	3.06176	117.377
945	16.5516	21.3673	3.55052	112.196
946	15.4078	15.9223	4.33304	107.187
947	13.3296	17.7559	4.02495	129.925
948	14.7113	16.6345	3.69902	93.0265
949	11.8109	14.5918	3.99262	130.283
950	23.8473	14.1887	4.0345	94.9477
951	14.9422	11.2941	3.7663	99.5892
952	16.6413	16.5263	3.05428	126.655
953	23.6345	14.1228	3.75	88.7234
954	15.915	15.0939	4.3292	90.208
955	14.4917	12.5423	3.64728	97.328
956	19.9435	13.7912	2.72584	104.351
957	19.6591	14.1517	3.27329	76.182
958	19.3421	11.2286	4.14548	71.0868
959	9.11391	10.6578	4.02988	116.111
960	12.3659	22.1074	3.31957	108.735
961	18.2139	12.7641	4.07221	70.909
962	26.9548	11.4124	3.89345	105.607
963	18.2405	13.3326	3.1338	117.88
964	20.6989	16.6935	3.068	112.742
965	22.1943	10.7924	3.46607	64.1331
966	16.387	14.4074	4.06484	81.3679
967	18.1281	15.426	3.19034	62.2775
968	14.7042	21.3848	3.90387	105.973
969	10.3716	13.9649	3.80187	79.1765
970	22.0985	25.1237	3.73502	78.9565
971	18.3438	17.2026	3.0628	79.3671
972	15.1813	16.9422	3.12479	93.5703
973	22.7825	15.6752	3.07944	112.989
974	10.7791	13.7471	2.4327	85.584
975	18.0301	26.0966	3.25532	82.414
976	24.3335	19.2062	4.01427	89.6559
977	16.9969	14.8264	4.09723	101.128
978	11.8119	10.6871	3.79813	93.8755
979	19.2876	11.3258	3.40694	91.7228
980	18.3714	12.8411	4.19259	87.4991
981	13.337	22.5778	3.33137	96.4757
982	13.9834	13.5342	3.79354	96.3065
983	15.6214	18.3758	3.30492	130.699
984	20.9285	17.1703	3.20421	102.431
985	13.7204	8.77668	3.27275	102.989
986	22.8082	11.0941	3.93616	90.8025
987	13.1368	26.1762	3.63401	103.355
988	11.001	17.2224	2.98883	88.1583
989	11.4089	16.0895	3.75422	96.0269
990	16.4439	8.40832	3.36963	93.235
991	17.3723	13.0928	3.42239	83.0558
992	15.5282	11.4225	4.00528	97.1703
993	17.82	19.7469	3.39848	75.6525
994	18.0487	7.14529	3.14096	112.03
995	9.18842	12.015	3.95127	62.8364
996	11.5752	14.4962	3.25357	94.3172
997	22.5479	16.7611	2.93912	135.122
998	14.1335	13.8968	3.49953	121.901
999	13.7805	16.7116	3.55864	103.846
1000	18.9868	18.0709	4.0362	106.586
1001	14.6119	20.2838	4.02237	107.056
1002	17.21	16.1179	3.79264	97.7575
1003	13.6107	15.7391	3.15999	104.455
1004	9.53209	18.3694	4.39932	56.3466
1005	15.9193	18.911	3.32656	145.046
1006	22.4379	14.1138	3.7184	94.5969
1007	13.1832	13.1615	3.76933	69.1555
1008	10.8494	14.027	3.79668	102.34
1009	11.9212	19.6536	3.9654	77.8157
1010	26.4962	20.4791	3.2442	120.006
1011	17.8799	15.9735	3.55308	83.3839
1012	12.0868	18.8843	3.89203	102.698
1013	16.1723	17.9278	3.52788	94.7374
1014	18.3034	12.7643	3.55822	89.5906
1015	13.4553	8.1163	2.89403	99.7893
1016	19.3391	13.4183	2.66262	103.947
1017	20.3533	14.0759	3.3504	96.1407
1018	12.2665	10.32	3.00255	93.255
1019	26.5883	22.4913	2.76051	110.46
1020	18.7022	17.6006	3.35775	96.6412
1021	19.6227	7.79372	3.7232	72.1316
1022	20.5131	11.6864	3.54876	146.264
1023	11.2825	15.7612	3.47932	117.459
1024	9.10487	18.2037	3.12708	80.1313
1025	12.7002	11.3252	3.30009	97.7939
1026	15.0759	15.6337	3.90198	93.588
1027	10.3911	14.1176	3.64228	72.5372
1028	8.00711	16.7609	2.66366	65.0983
1029	11.9437	15.252	4.06927	128.457
1030	18.3807	13.387	3.21029	124.493
1031	17.449	13.7471	2.84517	129.472
1032	12.7776	18.2375	3.74436	106.71
1033	28.1463	21.091	3.79556	78.7687
1034	22.3922	10.8507	2.93513	89.2522
1035	18.242	15.6619	3.43629	82.3963
1036	14.7142	18.1732	3.40133	113.899
1037	14.646	17.0947	3.1957	123.641
1038	16.3703	19.1065	3.01887	96.6397
1039	16.4435	11.636	3.8172	112.971
1040	16.4841	15.3754	3.29629	98.8238
1041	8.69181	10.9734	3.87296	92.8482
1042	10.556	12.0715	3.25826	100.797
1043	17.1649	25.8829	3.42154	126.988
1044	24.9957	11.1309	4.4913	69.7496
1045	12.2242	11.3328	3.5601	120.04
1046	17.0395	18.6085	3.73039	136.208
1047	17.4497	18.2849	3.78126	82.1631
1048	13.9	11.0363	3.35119	70.2911
1049	10.4666	17.2855	3.49961	64.0236
1050	11.5735	20.7781	4.12114	98.7572
1051	16.9921	15.3264	3.62762	86.2075
1052	12.7959	9.98393	3.38752	89.3711
1053	15.0667	18.9479	2.73828	111.208
1054	12.2549	14.075	3.62729	129.745
1055	18.1988	16.57	4.31594	75.3202
1056	19.3834	21.7453	3.43432	115.165
1057	22.0899	19.0487	2.93681	92.3726
1058	13.6245	17.8175	3.56599	95.8059
1059	17.6535	9.80071	4.60029	89.1692
1060	18.5566	7.91709	3.93808	114.793
1061	9.92032	17.1446	3.42017	103.331
1062	19.9358	13.5857	3.75865	99.8101
1063	15.6522	15.3898	3.44545	88.3626
1064	21.4111	8.77457	2.99218	91.7637
1065	21.5268	18.2874	3.38033	56.1548
1066	16.7181	27.4878	3.16746	124.193
1067	10.9032	20.8813	3.09253	100.595
1068	11.195	16.1789	3.22411	80.7048
1069	18.6478	14.6956	3.83192	72.2972
1070	13.0949	14.1309	3.80925	119.502
1071	22.6535	13.0552	3.00687	69.6275
1072	13.5828	19.6248	3.35709	75.6524
1073	24.2495	13.9755	3.88049	95.7784
1074	20.9578	14.5278	3.7551	116.921
1075	16.7326	24.5501	3.54871	82.2941
1076	16.05	14.6159	3.75226	88.1605
1077	15.0301	14.6683	3.86671	129.685
1078	19.1992	13.024	3.48512	101.007
1079	18.9744	14.8786	4.24397	95.6095
1080	12.2144	11.4053	4.22164	167.925
1081	21.4151	18.3304	3.40571	117.675
1082	15.2953	15.0642	3.65859	128.836
1083	17.5331	14.7983	3.08643	102.004
1084	23.602	11.2562	3.87272	124.314
1085	18.6618	17.4425	3.40068	98.7001
1086	17.1254	16.7459	3.20832	89.5639
1087	16.3262	23.5038	4.4293	105.387
1088	19.3172	18.0776	3.3936	117.156
1089	14.2229	20.2123	4.05551	101.853
1090	14.131	17.5452	3.33346	68.5779
1091	24.7158	12.8521	3.83067	124.471
1092	18.75	13.8441	4.00463	119.374
1093	15.0053	11.1333	3.3946	128.87
1094	20.4135	20.188	3.41969	128.325
1095	21.166	21.026	2.89404	130.982
1096	13.1506	22.062	4.20961	92.1854
1097	21.1632	18.6619	3.3702	117.819
1098	18.6546	16.4363	3.11183	126.939
1099	13.9512	16.0217	3.48235	101.803
1100	21.9983	15.4196	3.38208	122.507
1101	7.89984	24.5109	3.72517	105.828
1102	18.4304	16.1451	3.47484	86.7358
1103	16.6038	12.3888	2.90435	109.93
1104	18.3775	13.915	3.12113	92.0962
1105	13.6536	15.2677	3.58504	137.533
1106	19.8355	18.1068	3.54396	92.895
1107	12.6827	12.5138	2.83598	111.291
1108	18.438	9.83136	3.62437	115.192
1109	14.1933	10.1679	3.31872	116.127
1110	14.1835	12.4599	3.81272	140.895
1111	11.1167	8.7261	4.00789	80.3588
1112	14.423	16.0898	3.34205	104.553
1113	11.2256	7.7251	3.51688	88.2566
1114	18.7384	16.7925	3.99251	77.145
1115	14.7478	14.9649	3.42139	112.638
1116	13.1266	18.5396	2.9637	92.7153
1117	21.2666	17.0593	2.89153	113.777
1118	20.1327	15.251	3.81744	131.418
1119	13.7265	14.309	3.5294	103.253
1120	13.9038	21.648	3.98511	73.9982
1121	16.2497	7.8437	4.24439	106.02
1122	19.6251	17.2991	4.30546	96.5931
1123	12.0547	15.4652	3.96931	107.109
1124	22.2572	10.4712	3.3547	95.9295
1125	16.6077	20.4766	3.81784	95.4212
1126	19.0948	20.968	4.04706	108.18
1127	13.3771	19.4121	3.254	110.714
1128	14.062	13.1441	2.75747	118.249
1129	20.742	9.6983	3.40198	108.45
1130	19.7188	11.3118	3.76112	72.4847
1131	15.3079	11.5394	3.4412	78.9513
1132	12.6315	11.7753	3.55151	102.45
1133	20.7751	17.1557	3.14101	84.6514
1134	17.5274	15.0731	3.68458	134.543
1135	17.9167	17.3051	3.47637	114.878
1136	22.1844	21.4464	3.76541	62.4567
1137	12.2318	16.4544	3.80216	61.8452
1138	12.0717	21.3398	3.1793	129.025
1139	13.2715	14.5602	3.64815	117.672
1140	9.9241	17.8701	3.75603	131.552
1141	17.8834	12.9972	3.12967	94.6003
1142	17.3642	22.1306	2.1771	117.083
1143	17.9378	24.1882	3.51066	107.106
1144	15.5281	10.3281	3.9285	90.3019
1145	15.7088	14.1798	3.45559	117.4
1146	15.2249	11.9774	2.99707	109.21
1147	18.0918	8.59321	3.85385	123.262
1148	10.4226	18.2763	3.28671	127.109
1149	18.7002	8.22517	3.03005	86.441
1150	18.4096	17.5877	3.95003	88.8904
1151	18.2195	17.2148	3.46906	92.0864
1152	15.012	10.8737	3.34571	111.324
1153	15.4371	17.3468	3.24178	70.1099
1154	16.6979	12.0681	4.24424	111.961
1155	9.54889	12.3484	3.49484	113.679
1156	16.8013	12.5908	3.15833	111.198
1157	20.4105	10.6258	3.51339	69.203
1158	12.3671	15.1881	3.83369	102.57
1159	18.1827	11.0011	3.38475	83.2909
1160	9.98548	14.2284	3.77893	68.8066
1161	17.3205	17.7719	3.43331	107.763
1162	13.7757	14.1197	3.46762	99.0357
1163	13.9274	11.4033	3.77126	107.768
1164	18.8271	10.4247	3.31898	73.1096
1165	16.8651	17.8858	3.76634	103.682
1166	19.2685	11.2286	3.26177	100.803
1167	20.9156	13.7136	3.54941	100.297
1168	17.2583	13.7545	3.2651	97.0147
1169	20.1531	19.8749	3.53334	112.264
1170	20.1218	13.5406	3.80594	126.496
1171	18.0549	22.1595	3.92933	89.6121
1172	23.2148	10.2918	3.34008	56.3494
1173	19.3518	26.992	2.52563	92.7175
1174	21.0405	16.3572	3.95063	83.9311
1175	12.1936	15.2243	3.08897	117.703
1176	14.8593	19.7076	3.47931	126.897
1177	14.7931	18.1439	3.87591	104.452
1178	20.8067	17.0101	3.0176	75.7382
1179	19.165	24.4806	3.17485	105.994
1180	7.65491	21.219	3.56533	94.7487
1181	14.4429	14.6091	3.97912	125.098
1182	15.6184	13.7164	3.6262	98.2514
1183	20.1144	13.0984	3.68648	115.048
1184	17.1458	8.1303	3.5495	67.6741
1185	16.9456	10.5271	3.47954	149.751
1186	19.2108	16.9914	2.80963	99.715
1187	23.1657	12.2236	3.95021	80.9315
1188	17.3289	17.4484	3.7666	91.4375
1189	24.1724	10.635	3.75836	89.0012
1190	16.8847	13.0816	3.8622	108.737
1191	18.2571	11.455	3.60341	88.6945
1192	15.4474	17.5439	3.33565	119.258
1193	18.6888	23.0894	3.15423	96.864
1194	19.7809	14.8695	3.77658	113.091
1195	19.7278	19.3419	3.99745	130.089
1196	17.7926	12.9502	3.62903	98.9275
1197	12.9414	13.6433	3.44848	94.5841
1198	18.6156	14.3031	3.88372	110.732
1199	14.4732	23.4828	3.05133	85.6943
1200	11.2257	23.8138	3.30538	91.5122
1201	11.1366	13.3819	3.48923	90.8517
1202	19.2999	18.3814	3.33186	115.427
1203	17.0213	19.7807	3.80873	95.4962
1204	22.3577	14.6686	3.20003	112.984
1205	14.3725	10.9976	3.50248	106.658
1206	18.2752	13.0529	3.70225	99.0768
1207	9.36473	19.0408	3.76193	67.9207
1208	15.6714	16.8173	3.4989	94.338
1209	6.76057	14.2483	4.03311	67.1591
1210	15.647	10.8879	3.73983	100.555
1211	16.846	15.2022	2.93623	128.982
1212	13.4058	18.3702	3.53204	71.7067
1213	17.229	18.8797	3.46174	97.2717
1214	13.5156	17.3431	3.43776	121.781
1215	11.3502	19.2572	2.87472	79.9074
1216	12.5845	12.4344	4.0895	126.587
1217	18.6218	13.4006	2.77073	61.9456
1218	17.321	13.9825	2.80802	116.819
1219	8.25808	21.1295	3.27097	131.486
1220	14.8715	20.59	3.61806	90.8817
1221	14.0344	13.3221	3.87758	84.4094
1222	12.7696	10.3065	2.91032	116.709
1223	20.0617	10.9713	3.53806	126.884
1224	11.6154	16.0416	3.68111	119.704
1225	16.1978	12.7226	3.34163	107.881
1226	8.15691	12.5205	3.61562	88.7175
1227	13.3771	21.8822	3.9067	73.1346
1228	16.0994	15.6613	3.41993	110.588
1229	23.1796	11.5234	3.34198	90.3112
1230	14.9373	17.009	3.18817	96.7565
1231	8.70878	18.4652	3.82096	69.6956
1232	11.8874	18.411	2.98784	106.015
1233	15.1297	13.9225	3.38674	100.154
1234	19.3703	14.6836	3.83281	103.552
1235	18.265	16.2219	2.89193	81.1863
1236	13.3261	12.229	3.25357	79.3385
1237	20.525	6.9749	3.22176	92.7353
1238	9.2847	10.9206	4.06067	86.7708
1239	17.1214	11.5911	3.14496	111.95
1240	18.6692	10.5367	3.52299	95.3614
1241	20.4674	17.3142	3.55941	116.678
1242	13.8848	16.4358	3.3184	84.9958
1243	14.899	18.1283	4.10541	94.8276
1244	19.6215	19.7912	3.75765	118.428
1245	11.9657	21.3995	3.30365	77.7497
1246	19.8669	17.7724	4.03865	101.174
1247	22.906	14.7786	3.44998	134.051
1248	21.8819	21.96	2.91191	75.9642
1249	19.5438	18.342	3.61748	111.805
1250	12.843	18.5051	2.6987	98.3484
1251	15.823	21.8355	4.10504	102.72
1252	19.663	13.2764	3.83467	76.0586
1253	7.27913	13.4793	4.10387	94.7293
1254	14.1794	12.3788	2.97457	103.153
1255	14.0048	25.0721	2.71054	100.756
1256	15.0966	10.0594	3.61746	174.327
1257	14.88	10.3739	4.16035	69.4667
1258	12.7065	22.9668	3.88794	105.518
1259	10.9085	17.9561	3.46815	97.0811
1260	21.6522	18.2411	3.35214	84.7173
1261	17.3926	20.0086	3.58972	130.03
1262	12.8188	20.5099	3.31681	107.069
1263	19.3703	14.1772	3.32584	82.2246
1264	19.7362	18.6929	3.0125	94.4508
1265	19.0753	14.2076	4.50418	102.023
1266	21.8319	12.2334	3.70117	130.051
1267	15.819	16.6469	3.96136	116.737
1268	19.4516	9.4365	3.24793	97.0967
1269	10.1302	23.7078	3.62433	103.169
1270	11.9971	16.3763	3.51617	68.5302
1271	16.7384	10.882	3.73776	110.543
1272	19.7733	20.5848	3.4152	101.515
1273	10.6132	6.03325	3.08992	143.979
1274	17.5996	15.3303	3.74605	108.7
1275	11.5587	17.2414	3.47839	72.3454
1276	15.7792	14.7846	2.97004	103.164
1277	13.3912	15.099	2.83426	116.31
1278	15.2437	16.6757	2.88271	113.252
1279	20.3008	17.6411	4.04134	68.9441
1280	16.0894	14.9412	3.7363	101.6
1281	17.0562	18.9912	3.16039	79.6885
1282	12.0284	9.58593	3.27669	127.681
1283	20.3496	10.3474	3.162	97.2252
1284	20.2711	19.5139	3.41324	87.6744
1285	12.8307	15.6033	3.0922	118.022
1286	15.0793	15.2406	4.06291	103.928
1287	23.1909	16.1775	3.5847	84.4984
1288	17.7077	10.3635	3.25588	87.4077
1289	17.0526	13.4693	3.94965	134.503
1290	20.6005	15.077	3.85477	93.4468
1291	13.4829	18.6505	3.73542	102.115
1292	13.679	12.833	3.69537	89.6181
1293	14.9662	11.0082	3.64329	121.794
1294	16.863	7.59003	4.25005	81.7944
1295	9.08195	18.9532	3.47789	126.388
1296	14.7395	13.9192	3.39518	94.856
1297	16.8151	11.5371	3.9571	80.1407
1298	19.0847	15.1794	3.6845	79.298
1299	21.5468	21.8183	3.98192	66.6251
1300	19.5044	18.5638	3.23291	117.633
1301	13.9963	20.0535	3.35102	104.804
1302	22.7164	11.9594	3.4783	107.983
1303	17.703	18.4393	3.37938	119.719
1304	18.16	7.61969	3.41535	77.32
1305	8.78543	19.0798	4.20804	91.6741
1306	21.1561	6.80108	3.07394	95.2777
1307	14.2755	6.85169	3.4792	103.562
1308	15.3657	10.1547	3.31446	62.0806
1309	16.0893	22.6398	2.53482	107.682
1310	17.0594	21.3123	3.68822	86.5418
1311	13.5701	20.3322	2.90713	107.734
1312	17.5975	9.29454	3.59739	103.359
1313	16.9539	15.5449	4.02808	82.4472
1314	13.7907	8.17249	3.44596	91.0737
1315	8.21587	15.5826	3.22234	116.778
1316	12.6125	13.2679	3.1722	65.0949
1317	16.0487	20.8307	3.44069	110.231
1318	16.1352	26.1713	4.00402	66.4541
1319	15.6983	15.8911	3.33209	149.783
1320	13.2831	14.3626	3.24066	126.574
1321	18.021	18.673	3.51755	92.2303
1322	23.549	14.9631	3.96928	67.2473
1323	17.026	18.4172	4.09263	95.8036
1324	11.8258	11.9466	3.13658	57.7006
1325	19.9254	7.96994	3.39853	95.3685
1326	18.5409	14.5073	3.4323	85.6575
1327	18.7686	11.1677	4.0807	100.839
1328	16.6911	20.8583	3.61877	91.3131
1329	20.8121	22.9014	3.5332	99.0054
1330	24.2692	10.0083	3.79463	111.309
1331	16.0186	10.4869	3.41847	62.327
1332	14.1538	18.6076	3.51919	77.9634
1333	6.63192	20.6754	3.65984	95.275
1334	13.7289	8.00442	3.50933	130.62
1335	17.701	11.3866	3.69631	122.192
1336	16.9803	14.8481	2.58499	127.214
1337	18.4399	15.4661	3.7601	87.3239
1338	14.6222	23.4423	3.38823	101.535
1339	13.7338	9.91725	3.40907	90.3411
1340	18.5211	19.5897	3.52447	100.531
1341	17.482	18.4899	2.77057	93.1696
1342	12.8428	19.8612	3.44527	93.9217
1343	18.4478	24.0889	3.37753	112.286
1344	14.6756	24.9177	3.70199	123.334
1345	18.4445	19.2253	4.1583	90.5702
1346	10.9852	21.1862	4.16992	105.438
1347	16.1627	8.60088	3.69818	125.21
1348	14.9865	13.3335	3.47024	92.386
1349	11.8901	8.61476	3.28194	127.755
1350	16.7271	17.2323	3.50601	107.265
1351	15.7989	22.7856	3.74212	113.276
1352	22.0297	14.6125	4.17494	94.1653
1353	15.1876	12.4293	4.08486	90.6561
1354	13.8484	19.6778	3.85549	78.6544
1355	18.0064	14.5107	2.98159	100.031
1356	14.6984	10.9706	3.62277	113.813
1357	11.786	12.572	3.16414	114.171
1358	14.2892	14.4428	4.2347	128.947
1359	15.5272	15.6647	3.5875	104.171
1360	14.1652	17.3253	2.99968	101.713
1361	14.347	12.7806	3.47865	125.207
1362	21.7191	17.2032	3.24065	86.0827
1363	14.3347	16.0824	3.35232	111.469
1364	17.9779	12.538	3.28904	130.577
1365	11.5489	18.1896	3.534	102.242
1366	16.856	10.7711	3.40803	80.6163
1367	10.0497	17.9026	3.95541	101.799
1368	17.1778	13.8568	3.53378	88.3071
1369	14.4536	18.9516	2.67194	88.2423
1370	16.1668	9.01099	4.41854	121.806
1371	13.4629	12.569	3.34281	100.186
1372	18.7047	7.38121	3.64253	119.497
1373	10.8651	21.5756	3.3012	94.4318
1374	14.0563	11.227	3.13477	64.2754
1375	20.5357	13.2061	3.65848	78.7263
1376	8.91942	15.6085	4.25055	106.883
1377	14.1396	16.0372	3.63901	104.982
1378	20.6583	19.8104	3.21488	117.083
1379	17.238	18.3934	3.41047	117.096
1380	13.1053	11.5595	3.203	72.2577
1381	18.1034	15.6172	3.56081	96.125
1382	18.47	14.7343	4.28107	115.771
1383	20.1445	15.5736	3.68646	83.5112
1384	15.5334	16.9854	3.7888	116.145
1385	12.3085	20.8972	3.82648	102.909
1386	17.5422	17.0545	3.52724	113.985
1387	11.9137	19.6581	3.96964	76.3042
1388	10.0254	16.3113	3.3776	114.272
1389	8.10552	27.5196	3.39423	62.7848
1390	17.8205	13.4015	3.11599	114.89
1391	15.2964	10.4663	3.65524	108.406
1392	19.7691	7.39267	4.03624	81.2943
1393	18.6004	14.9093	3.5497	67.6469
1394	9.85028	17.2554	3.44541	80.0444
1395	18.4425	11.0452	3.88693	88.0813
1396	16.6663	13.3616	3.64038	94.2089
1397	23.0006	7.71316	3.81858	76.5817
1398	15.3129	28.202	3.1801	94.9757
1399	14.9414	20.4602	3.5995	99.2872
1400	15.6263	21.7055	4.1346	77.0979
1401	18.5801	21.0776	3.97064	131.347
1402	15.9251	6.80296	3.49754	92.2422
1403	8.14351	14.7579	3.2968	84.4417
1404	21.8478	16.7139	3.5662	89.1685
1405	13.0488	13.1811	3.87223	103.362
1406	13.753	17.0727	3.6442	64.6999
1407	16.3649	13.5816	3.55053	101.471
1408	17.5511	14.3617	3.41475	71.8797
1409	22.894	20.6726	3.94409	84.1796
1410	11.1702	22.6643	3.21403	113.618
1411	21.8901	12.8065	3.25451	118.033
1412	16.0027	16.4048	3.66885	123.202
1413	17.5081	14.6772	3.53331	91.5318
1414	16.4641	13.9512	2.79781	75.8871
1415	17.2357	11.872	3.53647	110.848
1416	17.6645	17.3052	3.81756	96.8419
1417	12.7929	7.68365	3.53992	109.219
1418	13.8316	15.9697	3.11738	117.875
1419	11.7478	13.8012	3.7783	69.9471
1420	16.3103	14.3154	3.49189	105.524
1421	22.1588	8.61627	3.99364	88.8448
1422	15.5151	13.865	3.96546	55.3711
1423	15.269	10.7868	3.58653	131.395
1424	19.0694	19.8129	3.67073	105.534
1425	13.551	8.74741	3.96512	91.5604
1426	13.4658	23.8162	3.84719	128.629
1427	16.1161	13.3625	3.91696	114.309
1428	13.8769	11.9303	3.54843	120.211
1429	22.0953	21.0832	4.45474	91.6439
1430	13.865	18.8518	3.76049	81.6917
1431	18.7866	19.4849	3.74259	79.8079
1432	13.587	9.11045	3.55419	62.1947
1433	21.3803	16.7402	4.24505	61.1136
1434	14.1712	14.3194	3.7638	99.6657
1435	18.8348	19.8359	3.57982	124.754
1436	10.6988	11.6083	3.39105	64.4817
1437	15.129	16.0622	3.87399	94.6629
1438	14.7949	18.5877	3.10585	136.063
1439	14.6052	19.9878	2.68787	83.4121
1440	15.6405	16.4184	4.20551	70.3446
1441	21.349	13.0981	3.86105	108.401
1442	18.8054	23.9676	3.49481	124.561
1443	18.0054	15.9982	4.07008	92.7081
1444	12.9528	15.4431	3.52522	101.458
1445	11.2374	17.8196	3.46545	93.3942
1446	22.9151	15.068	3.60205	118.644
1447	8.50667	21.2095	3.46977	103.229
1448	15.8604	15.1521	3.08269	64.7441
1449	19.8704	15.2555	3.18668	115.575
1450	20.6079	16.1321	3.5846	69.6383
1451	11.0901	24.0626	2.63371	126.778
1452	13.5393	15.5311	3.78883	120.946
1453	24.7506	20.9994	3.13274	91.1952
1454	9.45199	17.3414	3.15553	103.507
1455	17.7363	9.55141	3.49762	128.31
1456	21.4399	16.251	3.6437	75.6957
1457	19.6818	22.711	3.49996	115.555
1458	12.764	15.2483	4.03948	109.414
1459	12.6313	18.1528	3.82031	100.553
1460	17.8559	20.1522	3.13184	97.214
1461	10.3285	10.8706	3.68425	113.483
1462	18.3207	19.89	3.39139	112.904
1463	18.7407	23.2416	3.55768	116.84
1464	8.62619	19.2288	4.69598	121.223
1465	21.8755	12.7514	3.47637	53.451
1466	12.2242	19.1979	3.35292	93.1936
1467	15.6973	11.6664	3.61847	87.6853
1468	20.1365	9.35513	3.01372	105.275
1469	17.6839	13.1001	3.8733	102.804
1470	16.521	17.4979	3.91026	92.8624
1471	19.889	8.75835	3.0272	99.6507
1472	8.72921	17.7537	3.61798	79.0937
1473	20.0416	15.3861	2.77761	110.26
1474	21.7258	6.40938	3.23907	118.06
1475	16.5323	15.0126	3.3849	96.9945
1476	22.6919	18.8724	4.33774	81.2595
1477	14.1354	13.6844	3.5361	141.737
1478	18.5861	17.799	2.75576	80.3723
1479	16.7803	15.238	2.84559	87.1809
1480	9.6217	19.0184	3.96557	107.861
1481	12.2672	16.9395	2.9805	82.9751
1482	17.1221	18.1925	2.73444	123.541
1483	10.5904	15.6564	4.20917	92.0102
1484	12.0107	14.4623	3.2492	120.787
1485	19.0094	13.4329	3.67225	91.6415
1486	15.3269	14.7747	3.2884	126.755
1487	17.3104	11.5372	3.28537	93.2913
1488	13.4747	16.6621	3.2316	86.913
1489	17.5137	17.9914	3.53938	110.374
1490	14.5895	14.3525	3.02258	91.6892
1491	19.595	14.3723	3.33319	86.3288
1492	17.5174	15.9916	3.28041	100.673
1493	17.4956	12.7141	3.13524	120.54
1494	19.3855	14.7158	2.79773	98.1071
1495	17.4954	12.5839	3.72227	77.3283
1496	19.3938	17.6131	2.86599	107.428
1497	20.0982	18.9109	3.30073	103.459
1498	14.6577	16.609	3.93925	125.591
1499	13.9217	10.8194	3.33974	95.8024
1500	16.1774	17.8824	3.48462	122.443
1501	17.0083	11.8728	4.00888	121.536
1502	23.4581	11.7632	3.68835	101.818
1503	13.5485	18.032	3.27298	114.958
1504	19.5413	16.0436	3.74681	108.663
1505	15.651	20.2306	3.265	69.6669
1506	19.1344	19.9673	3.77069	96.7772
1507	13.2532	19.4084	3.97786	80.7003
1508	22.2766	14.4888	3.26657	113.095
1509	13.6613	11.4074	3.85627	106.872
1510	11.4973	13.0945	3.65017	129.3
1511	12.3975	16.3098	3.86619	107.943
1512	15.6343	18.385	3.72272	75.5065
1513	11.4974	24.0354	3.35795	96.7044
1514	18.6734	17.392	3.12324	107.928
1515	13.9716	14.1306	4.06884	111.77
1516	10.5666	11.8171	2.81413	125.749
1517	14.7472	11.9364	3.83433	97.6301
1518	15.5112	12.1909	3.33849	97.5485
1519	8.42387	20.6117	3.33067	63.0294
1520	21.3528	19.0031	3.40033	109.219
1521	16.6655	11.1624	3.46481	141.507
1522	15.1744	16.5845	3.47617	94.8204
1523	11.1383	21.6981	3.3606	97.2853
1524	11.4094	17.028	3.1946	79.6142
1525	16.2871	13.6451	3.78413	103.594
1526	7.36146	16.0635	3.07502	118.725
1527	16.0658	17.2277	3.6364	80.522
1528	14.0819	11.7256	3.12629	86.6136
1529	14.4415	15.2694	3.50196	128.881
1530	12.1809	9.77483	3.41031	92.5877
1531	15.6104	7.58808	3.56232	83.3948
1532	12.6774	11.2284	3.20588	92.8552
1533	17.146	16.8993	3.31669	70.0158
1534	19.2434	15.0246	3.99337	82.3062
1535	22.1349	17.7685	3.33536	116.814
1536	16.7336	14.7396	3.53284	81.0244
1537	21.9874	14.0462	3.77621	100.469
1538	21.8143	15.2494	3.46954	107.871
1539	24.6757	22.1011	3.37084	97.4873
1540	15.6807	13.7918	4.00613	103.347
1541	24.7226	12.4478	4.01815	109.726
1542	15.4583	18.1404	3.42473	114.061
1543	18.9404	14.1245	3.85236	104.862
1544	14.4771	16.8546	3.34476	108.709
1545	16.588	25.5324	3.54938	88.1426
1546	14.8195	24.523	3.37358	110.47
1547	17.0961	21.4324	3.07516	69.4155
1548	21.6507	10.5869	2.69527	116.588
1549	16.9612	16.4584	3.69046	76.0929
1550	9.36813	13.352	3.11901	128.36
1551	11.468	16.8992	4.05429	116.711
1552	10.8922	9.92678	3.44886	102.442
1553	14.5926	12.5403	3.63095	93.0425
1554	9.37876	6.44776	3.9494	80.5395
1555	13.5811	20.8748	3.10522	81.2267
1556	11.1201	22.9734	3.32766	111.536
1557	14.8453	15.661	3.99473	96.2403
1558	12.462	17.4705	3.98642	90.8782
1559	11.1142	13.2476	4.04683	105.004
1560	14.9481	13.5836	3.62657	96.734
1561	15.0855	8.96363	3.30939	129.376
1562	16.3307	6.24269	3.82869	106.36
1563	9.49167	18.8131	3.69362	126.824
1564	17.199	11.4579	3.58938	140.209
1565	15.3562	22.8796	3.89049	116.63
1566	14.588	11.023	3.45316	103.073
1567	18.717	13.897	3.01225	79.18
1568	18.335	17.7525	3.67641	135.91
1569	18.3842	13.9141	3.87177	82.7049
1570	13.571	14.128	4.00843	116.972
1571	26.0823	15.0805	2.88272	100.179
1572	20.9842	12.5276	3.61221	86.003
1573	18.9127	19.4089	3.8188	96.8408
1574	10.0265	12.023	3.56183	92.5946
1575	26.7786	17.6373	3.72074	102.566
1576	17.0901	16.3815	3.38011	118.06
1577	14.0498	15.7913	3.22269	118.387
1578	16.1972	24.8133	3.37509	76.8294
1579	20.9795	15.5952	2.91008	99.6388
1580	16.9124	11.1525	3.06577	93.7851
1581	24.1974	7.20521	3.45222	122.592
1582	13.3892	6.62834	3.32784	133.255
1583	12.205	8.7568	2.77188	103.053
1584	15.2185	15.402	3.67201	85.525
1585	22.4465	17.1137	3.23115	114.428
1586	19.4137	19.3409	4.02609	96.8869
1587	21.8727	13.5404	3.74326	139.775
1588	16.4069	7.54538	3.32562	92.6047
1589	14.9541	20.17	4.33086	91.9057
1590	17.7512	17.1279	3.07446	107.406
1591	18.8402	14.8697	3.70657	83.4593
1592	17.0696	19.5688	3.09307	100.178
1593	8.74981	15.0581	3.37027	105.415
1594	17.6957	10.5588	3.10808	160.382
1595	16.1189	19.5888	3.70096	121.429
1596	16.4343	15.1877	3.70175	124.641
1597	16.309	12.2228	4.08545	116.352
1598	12.0794	14.7955	3.03013	89.1412
1599	11.0379	18.499	4.26736	100.146
1600	11.4187	21.1239	3.16022	85.7916
1601	13.7351	18.7792	3.93445	98.5665
1602	19.5843	17.9278	3.87591	99.5806
1603	13.2077	9.63443	3.70102	135.791
1604	20.7657	12.2534	3.4608	98.9929
1605	14.0223	13.567	3.23397	81.726
1606	14.9948	21.2635	3.34863	111.175
1607	14.6522	13.0918	3.47637	104.459
1608	12.819	16.5627	3.27603	95.5773
1609	14.7648	16.6428	2.99062	109.577
1610	16.5577	12.2203	4.23532	118.997
1611	20.875	9.56144	4.26688	89.9127
1612	14.8968	12.8247	3.63941	151.764
1613	16.2569	14.8695	3.75602	77.1435
1614	10.3951	11.1443	3.39962	133.896
1615	15.7488	15.8361	3.16391	87.4438
1616	20.2863	20.9771	3.83598	99.4322
1617	27.3588	19.1394	3.72211	79.1461
1618	15.3042	14.9646	3.46116	118.869
1619	13.5771	21.1736	3.33	86.7443
1620	13.992	14.0513	3.40881	110.432
1621	6.42061	8.26134	2.85092	124.553
1622	13.939	21.6853	3.69335	103.775
1623	17.9183	21.0196	3.81659	96.8366
1624	20.2804	14.1306	3.48425	82.7064
1625	16.2559	22.4387	3.40902	121.451
1626	13.8981	11.8856	4.03022	100.039
1627	9.73747	11.0089	3.49723	115.239
1628	15.6708	15.5525	3.27817	90.5963
1629	16.8896	14.4385	2.87033	113.726
1630	9.98231	15.1589	3.36553	106.002
1631	15.4073	21.2482	3.92876	123.843
1632	14.8952	24.2897	2.94393	87.0571
1633	19.204	18.7817	3.00152	89.873
1634	16.436	7.08206	3.98182	85.741
1635	21.9798	15.7061	3.66509	103.993
1636	11.3904	13.0497	3.41487	94.456
1637	22.0372	16.2219	3.93617	95.7625
1638	19.1723	15.9525	3.72291	116.749
1639	28.6399	17.8234	3.87753	127.966
1640	15.754	11.5165	2.91484	93.7141
1641	10.9669	16.6731	4.48573	91.3923
1642	12.3611	19.8425	3.21709	81.8919
1643	14.8076	13.8288	3.62338	88.7109
1644	14.7875	17.3848	2.95618	75.3695
1645	17.598	22.135	3.31867	99.4856
1646	15.1355	6.38525	2.93747	90.2651
1647	22.6235	17.6526	3.49125	83.593
1648	11.0449	22.1634	3.73513	110.134
1649	9.53603	20.2825	3.98747	105.508
1650	13.9828	15.4893	3.14194	99.4301
1651	22.188	9.29727	3.10972	100.741
1652	12.6185	15.507	3.56606	104.58
1653	12.8722	21.8527	3.07637	107.711
1654	27.4019	20.1783	3.68206	87.0448
1655	19.2057	12.6257	3.58566	91.7812
1656	14.8725	9.54221	3.37125	95.8203
1657	11.928	22.2091	3.5841	117.754
1658	21.4847	22.6726	2.69113	92.3746
1659	11.7195	10.2244	2.6849	134.524
1660	17.7885	18.1982	3.12104	68.4098
1661	12.7133	22.437	3.04971	103.706
1662	17.4586	21.3544	3.87736	115.738
1663	26.7479	20.2711	4.03038	54.5898
1664	13.7003	16.7253	3.22917	106.905
1665	21.9464	12.299	3.84753	105.589
1666	7.8582	9.02827	2.90238	122.609
1667	16.6005	20.6042	2.67597	89.301
1668	19.045	12.182	3.07365	104.716
1669	11.4569	14.2589	2.87171	124.208
1670	13.6167	9.49397	3.85801	78.1315
1671	12.4683	20.2537	3.28428	121.888
1672	20.3377	13.7645	3.62549	102.708
1673	21.2793	11.442	3.4079	106.664
1674	18.4852	19.5444	3.56537	88.845
1675	17.7272	18.2615	4.04116	78.2273
1676	16.6825	22.5405	3.77257	95.8578
1677	16.5092	17.6999	3.71604	89.3924
1678	24.4409	13.6278	4.03411	93.6881
1679	20.4085	17.5025	3.44376	104.706
1680	11.0832	12.3652	3.85168	90.6658
1681	17.2721	11.259	3.00682	102.331
1682	23.685	7.3943	3.84486	108.146
1683	25.086	9.63535	3.5297	79.6938
1684	9.1631	18.6165	3.35377	106.828
1685	22.0965	11.9984	3.95804	94.6134
1686	19.6656	15.93	3.41922	109.562
1687	16.3972	17.9975	3.14844	117.581
1688	11.1178	11.5889	3.03373	70.1304
1689	16.997	16.8821	3.69441	52.0142
1690	20.4207	17.6567	3.02931	85.43
1691	11.1433	14.4239	3.5974	143.804
1692	14.093	16.3261	3.11271	97.368
1693	20.6132	14.5202	3.36693	120.374
1694	18.9341	16.57	3.56755	87.8401
1695	18.7131	14.0545	3.27748	85.1931
1696	20.9824	9.78943	3.76486	131.301
1697	14.5746	21.5994	4.21607	107.858
1698	14.8403	17.038	3.70408	74.1245
1699	16.6879	7.20711	4.02827	91.834
1700	14.4756	13.1385	3.47044	136.749
1701	20.5328	17.4453	3.97477	93.5483
1702	20.4984	14.5011	3.67496	85.1701
1703	10.2136	15.7323	3.4367	96.6231
1704	21.2096	8.02929	3.13129	97.1423
1705	15.9137	18.2094	3.16285	102.887
1706	19.6893	21.1683	3.43426	115.991
1707	15.3282	12.8704	3.85277	82.2345
1708	20.5747	16.2861	3.40606	96.9771
1709	14.9524	13.0438	3.56203	80.0249
1710	21.5877	18.2622	3.96065	85.2515
1711	18.2569	9.86744	3.84284	96.8817
1712	13.8317	19.8427	3.41649	109.135
1713	18.5691	11.8488	3.48084	74.4346
1714	23.2695	14.2429	3.45187	126.926
1715	15.7863	10.007	3.90715	78.6534
1716	18.8635	20.2996	3.12548	132.446
1717	14.3671	9.38207	3.6719	135.22
1718	20.9883	22.3602	3.99917	84.7823
1719	16.8923	21.9855	2.90518	108.079
1720	18.6267	9.97816	3.76947	141.41
1721	18.7854	14.5004	3.06243	95.8283
1722	12.4103	10.4516	4.2346	146.619
1723	13.122	20.561	3.42568	67.1824
1724	13.5481	15.6288	3.53511	117.324
1725	19.3595	16.9625	3.45892	101.224
1726	16.5586	16.6165	3.46799	126.172
1727	16.5144	11.4498	3.49653	106.7
1728	12.374	7.16407	3.78283	102.361
1729	15.5818	15.995	3.68049	117.959
1730	20.0565	22.6796	2.73877	93.8151
1731	18.812	20.7615	3.5024	95.5875
1732	16.423	9.45404	3.38566	96.0325
1733	19.829	15.7261	3.48469	87.6445
1734	10.8066	15.2379	3.37828	102.368
1735	16.9809	12.2206	3.82168	92.2768
1736	12.2721	18.889	3.44737	133.912
1737	22.7064	18.7499	3.80294	84.6287
1738	17.3522	20.6911	3.42438	108.756
1739	14.8688	12.7229	3.40463	98.797
1740	8.45734	14.1101	2.60762	67.8857
1741	14.1004	21.3034	3.72553	92.5054
1742	14.7827	9.07174	3.35189	86.2647
1743	18.5902	12.1956	3.51669	75.4026
1744	13.4748	15.3816	3.40918	112.632
1745	17.2044	19.5787	3.64466	103.818
1746	17.7291	13.0499	3.57549	127.589
1747	15.5743	17.0566	3.64303	111.858
1748	13.0186	21.6302	3.10881	96.7661
1749	19.2372	17.0631	3.14444	72.9158
1750	23.168	22.8717	3.80402	112.347
1751	17.4604	11.8856	3.53079	83.1608
1752	17.08	18.1955	2.90665	109.105
1753	8.34115	18.343	3.12821	86.4967
1754	10.3915	18.4673	4.00138	124.136
1755	17.1407	25.2459	3.1147	98.7914
1756	13.1193	12.1114	3.16562	93.3753
1757	20.5316	18.5042	3.73079	111.211
1758	8.60683	16.7786	3.04904	121.156
1759	22.1997	11.7723	3.76091	123.078
1760	14.1407	28.0429	3.8523	102.634
1761	22.1672	16.0506	3.23433	97.7626
1762	10.6079	18.4948	3.8574	94.0633
1763	15.9923	14.0662	3.84973	135.057
1764	12.9183	20.3999	3.53345	105.521
1765	12.9749	12.6639	3.30797	103.7
1766	19.1809	16.533	3.72956	94.7495
1767	14.1763	12.3473	3.01155	99.7534
1768	17.1951	20.5007	3.02251	79.6967
1769	22.2008	12.9319	3.79573	100.579
1770	20.0067	19.8876	3.73904	79.3135
1771	19.193	19.6943	3.56631	100.118
1772	14.459	13.565	3.59122	136.564
1773	16.434	12.1641	3.81265	125.729
1774	13.87	14.5916	2.76811	74.1619
1775	15.3649	13.851	3.47156	88.9407
1776	17.1633	19.9624	3.30521	85.4192
1777	18.3351	24.8708	3.70451	109.639
1778	15.466	15.9819	2.80765	132.785
1779	10.9015	13.8585	3.28994	93.0454
1780	18.9793	11.4061	3.78444	85.459
1781	15.3129	17.561	3.05737	60.11
1782	19.1937	17.1022	3.43898	111.762
1783	21.5669	16.411	3.77054	100.976
1784	15.7659	14.9516	3.84288	103.496
1785	21.0336	17.5743	3.9918	89.4047
1786	9.81639	14.328	3.0925	106.302
1787	11.925	20.9899	3.83787	104.732
1788	22.7089	15.343	3.08911	102.191
1789	17.4774	11.2694	3.14398	92.5796
1790	19.2405	13.5879	3.07492	96.319
1791	22.3612	21.205	3.515	92.2593
1792	13.25	8.62056	4.34909	79.2456
1793	14.9997	13.0805	3.56888	122.791
1794	22.3906	14.9362	4.06781	102.827
1795	20.1717	12.8251	3.11285	71.3212
1796	11.7521	10.2523	3.5017	104.387
1797	10.7952	20.7708	3.64416	84.4649
1798	14.5725	10.7703	2.80467	106.751
1799	15.8305	18.9139	3.52183	95.9152
1800	18.7488	15.0407	3.24503	78.7482
1801	11.774	19.0575	3.83476	71.3056
1802	18.2374	14.0257	3.64537	150.086
1803	20.1354	13.9473	3.64831	89.4323
1804	14.1766	9.86178	2.9862	84.1706
1805	11.8408	10.1569	3.73259	99.3086
1806	21.4734	12.9021	3.24158	84.8047
1807	12.5249	13.071	3.85873	117.583
1808	15.7715	14.2313	3.0556	100.554
1809	24.9699	12.6532	3.3138	112.074
1810	12.391	13.3083	3.54861	77.0528
1811	8.81579	7.96912	3.59295	96.5121
1812	24.2653	20.0517	3.68778	62.6157
1813	19.6344	19.7262	3.70381	92.6346
1814	23.4753	10.506	3.53391	114.683
1815	11.8156	14.0773	3.72882	111.618
1816	22.8326	12.698	3.40263	129.185
1817	22.776	17.3714	3.33941	73.1262
1818	22.7913	17.701	3.42754	102.784
1819	16.2744	12.4336	3.26531	106.642
1820	18.1773	18.2303	2.97166	110.939
1821	10.0678	20.8755	3.88642	130.09
1822	9.95195	10.1543	3.68155	61.467
1823	14.8323	21.7387	3.49412	89.5859
1824	18.8997	15.5896	3.89021	72.3371
1825	9.2738	20.4296	3.13789	85.9156
1826	16.4667	20.9316	2.84521	153.981
1827	13.3286	20.4484	4.07371	73.5791
1828	22.7139	11.0289	2.8634	130.281
1829	12.8265	14.9043	3.45059	112.014
1830	17.7588	15.2677	3.58117	121.712
1831	20.0817	14.3664	3.65779	93.0148
1832	16.2816	12.7439	3.56431	91.575
1833	19.4765	9.45325	3.36308	96.5237
1834	14.3432	11.7131	2.99233	89.3897
1835	19.6144	21.423	4.00232	90.0887
1836	16.9923	14.0073	3.37486	106.585
1837	18.4593	18.9867	4.26144	100.863
1838	10.9379	17.8783	3.04081	110.799
1839	18.8939	25.0249	3.35162	107.921
1840	15.6098	8.4502	3.84822	91.5069
1841	15.1801	16.7131	3.2027	95.3563
1842	18.1697	15.2836	3.6815	130.048
1843	15.6098	12.8334	3.29665	92.4268
1844	20.1298	16.9224	4.43125	88.6914
1845	11.3565	18.3091	4.06787	124.786
1846	11.368	12.7515	4.02573	93.3641
1847	19.5565	14.756	3.20744	95.4686
1848	11.5653	12.2296	3.55315	95.4821
1849	14.7272	10.4072	3.40107	101.772
1850	13.4471	19.7927	3.45258	86.5732
1851	20.0823	13.6807	3.44227	123.877
1852	12.7584	14.0401	3.03746	118.138
1853	19.2183	19.9727	3.51948	98.5984
1854	16.6272	18.2028	3.51115	116.43
1855	20.1754	10.838	3.51608	78.5294
1856	11.5915	18.3836	3.55326	126.606
1857	13.4711	9.73297	3.50632	78.9126
1858	18.4326	19.19	3.61043	103.2
1859	14.5497	12.5993	3.26954	106.613
1860	13.7576	12.8501	2.35318	89.3092
1861	24.6408	15.0898	3.80611	83.8078
1862	18.6414	9.93091	3.51578	87.3441
1863	11.7908	13.2394	3.77174	86.43
1864	13.0801	11.9002	3.8955	114.688
1865	14.8278	17.5794	2.95268	104.103
1866	19.8814	6.09837	3.20344	118.965
1867	13.722	11.4897	3.32725	134.52
1868	20.144	26.6069	3.72396	101.523
1869	9.70171	18.7541	3.30024	99.2602
1870	15.7395	9.72999	4.17322	104.209
1871	5.87161	7.84598	3.50429	79.4344
1872	12.4951	13.5737	3.49438	123.482
1873	24.3255	25.8135	3.63897	90.8427
1874	14.7747	11.4479	3.28487	135.906
1875	21.439	12.9233	3.06286	89.7818
1876	17.755	11.3624	3.29094	99.2395
1877	13.8112	21.0734	3.55695	112.501
1878	16.4044	13.8113	3.98756	111.644
1879	18.5946	15.9617	3.25388	86.6094
1880	19.6766	18.5939	3.49425	81.566
1881	14.8954	11.9982	3.73432	110.634
1882	11.5977	22.3272	3.88101	120.127
1883	16.236	17.9524	3.19783	61.9335
1884	16.2302	15.434	3.73235	68.1911
1885	21.941	9.78906	3.40518	109.052
1886	16.3975	13.8201	3.5932	101.342
1887	22.1037	16.1606	4.10758	118.389
1888	11.2157	20.9484	3.50389	117.283
1889	16.398	20.7876	3.19306	124.422
1890	22.0625	22.4169	3.42369	92.8312
1891	17.2814	9.7982	3.56498	82.2559
1892	17.079	9.13024	3.07282	87.5896
1893	13.6309	15.3204	3.85003	112.972
1894	13.3463	13.748	2.92792	112.398
1895	14.8521	22.3359	3.66812	75.5385
1896	10.5791	18.0181	3.81661	105.717
1897	7.98031	16.8217	3.15493	98.2867
1898	19.8279	16.5814	3.53828	112.509
1899	11.5077	13.8007	3.32458	97.9458
1900	10.9264	14.16	3.62545	103.742
1901	20.0656	11.7846	3.45071	100.03
1902	12.6907	21.8004	2.91568	106.818
1903	7.77292	22.0574	3.82622	92.8129
1904	14.3853	25.2283	4.20554	67.6307
1905	21.9642	15.1104	2.85122	104.23
1906	13.3684	19.9463	3.08392	133.681
1907	15.7457	15.2321	3.68963	78.5906
1908	18.644	17.3396	3.4613	82.04
1909	20.2789	19.6589	3.6591	109.945
1910	8.29204	9.43122	3.49366	99.9214
1911	9.33385	8.25955	3.7773	94.375
1912	16.0949	18.7244	4.04889	93.7789
1913	14.5759	23.5599	3.20515	71.129
1914	21.3124	17.9381	3.04779	89.1128
1915	18.6766	27.8678	2.99583	133.824
1916	10.3992	22.184	3.51977	90.4455
1917	15.8454	20.1175	3.94329	79.8345
1918	15.2494	21.5397	3.25106	104.565
1919	17.3459	20.5537	4.14296	135.628
1920	13.0159	7.78992	3.57504	122.475
1921	15.8124	17.2607	2.99314	107.864
1922	15.2393	11.9957	3.39457	138.421
1923	10.729	15.1805	4.03726	112.675
1924	20.5375	12.3433	3.72116	88.4347
1925	20.5779	19.6264	3.51747	104.696
1926	23.8404	14.2797	3.25668	85.3124
1927	20.313	20.7802	3.80405	123.987
1928	12.5218	21.1371	3.83515	120.886
1929	15.3921	7.40157	2.96619	82.3093
1930	15.6009	14.6777	3.89057	92.3758
1931	18.7652	14.4478	3.60035	88.3006
1932	18.196	16.9859	4.18161	92.3084
1933	12.2656	12.668	4.15182	119.982
1934	15.0545	16.4102	3.418	106.782
1935	21.7446	16.9684	3.66055	130.534
1936	8.87454	13.3756	3.55286	104.715
1937	14.9863	17.6719	3.58833	93.9537
1938	17.8432	13.725	3.4271	107.179
1939	19.4146	13.6993	3.5256	89.7962
1940	13.1295	9.7067	3.14736	115.973
1941	16.9573	18.264	3.63242	109.61
1942	14.1712	15.438	3.61616	80.6409
1943	24.2029	17.1268	4.26438	123.878
1944	15.659	13.8899	3.6964	93.3656
1945	16.2655	9.39905	2.72351	68.4676
1946	18.371	25.9499	3.1694	95.015
1947	19.9478	9.48401	3.61691	79.8689
1948	18.59	12.2175	4.08089	83.9256
1949	18.7199	22.3016	3.9854	94.6414
1950	12.2572	19.147	2.78794	83.4443
1951	15.7043	10.9661	3.53985	67.2141
1952	9.08634	10.8224	3.44953	127.849
1953	19.8978	19.2176	4.22808	85.9556
1954	15.8489	15.3493	3.22261	112.429
1955	14.6451	18.3121	2.5378	74.952
1956	16.1004	8.43797	2.75195	85.6554
1957	19.6598	12.7218	3.2488	89.6513
1958	17.7654	19.7511	3.55802	110.526
1959	17.175	16.7006	3.63344	100.016
1960	15.307	19.8708	3.03616	118.474
1961	14.8476	13.0898	4.07081	125.173
1962	18.6343	19.2674	2.89287	139.506
1963	16.0354	19.8096	3.25948	111.258
1964	15.7225	16.287	3.35618	115.625
1965	15.9344	7.709	3.52277	108.162
1966	22.6013	17.1008	2.50809	109.831
1967	17.1876	18.0364	4.22437	98.7977
1968	16.0643	17.078	3.64914	93.849
1969	13.9723	22.8044	3.71603	95.0867
1970	19.9512	19.8925	4.11854	87.928
1971	18.8445	19.2973	3.09691	109.996
1972	17.7031	17.2284	3.15944	73.4715
1973	13.7881	17.5843	3.501	82.6406
1974	10.7476	10.2071	3.67166	90.5211
1975	24.5725	21.0934	3.35619	105.663
1976	13.9865	15.1421	3.35708	109.221
1977	11.2332	10.7452	2.9871	92.3801
1978	19.5112	15.5587	3.18938	111.761
1979	17.8251	7.45073	3.44942	108.688
1980	10.3155	11.8009	3.83262	85.585
1981	19.0408	16.1459	4.14503	98.7562
1982	11.6908	11.6839	3.8551	109.236
1983	14.0482	16.1529	3.52687	104.235
1984	20.983	12.24	3.48697	130.034
1985	14.8833	13.2458	3.87188	95.4091
1986	17.9452	18.079	2.97531	102.993
1987	19.0359	24.0758	4.07727	90.6188
1988	19.8555	11.0132	3.52207	94.3352
1989	15.4116	9.39991	3.69382	85.1029
1990	10.8663	18.9064	3.76113	71.3626
1991	10.9451	12.9904	2.86488	87.592
1992	20.5482	13.554	3.31138	103.908
1993	20.2051	18.5889	3.24038	98.1875
1994	14.8373	20.7728	3.99509	103.127
1995	25.7909	14.6011	3.2561	119.465
1996	15.3653	16.5131	3.72371	116.576
1997	18.4194	15.2699	2.90451	54.1204
1998	18.891	18.3975	3.4201	117.12
1999	22.8043	14.6849	3.63936	98.6574
[truncated: 8,001 more rows]

## Sheet: Simulation Output Values 1
Sim #	ADD	ADDc	CR	HQ
1	5.6297e-05	2.71329e-06	1.80886e-06	0.187657
2	8.70352e-05	4.19475e-06	2.7965e-06	0.290117
3	0.000135914	6.55053e-06	4.36702e-06	0.453047
4	0.000101085	4.8719e-06	3.24793e-06	0.33695
5	0.000119065	5.73845e-06	3.82563e-06	0.396882
6	0.000122287	5.89375e-06	3.92917e-06	0.407623
7	6.4791e-05	3.12267e-06	2.08178e-06	0.21597
8	6.46222e-05	3.11454e-06	2.07636e-06	0.215407
9	6.88865e-05	3.32006e-06	2.21337e-06	0.229622
10	9.27297e-05	4.46921e-06	2.97947e-06	0.309099
11	0.000132763	6.39864e-06	4.26576e-06	0.442542
12	5.50627e-05	2.65381e-06	1.7692e-06	0.183542
13	0.000222099	1.07043e-05	7.13619e-06	0.740329
14	9.34639e-05	4.50459e-06	3.00306e-06	0.311546
15	9.52867e-05	4.59245e-06	3.06163e-06	0.317622
16	0.000111414	5.36971e-06	3.5798e-06	0.371379
17	6.87345e-05	3.31273e-06	2.20849e-06	0.229115
18	6.48318e-05	3.12464e-06	2.08309e-06	0.216106
19	0.000128461	6.19132e-06	4.12755e-06	0.428204
20	5.18436e-05	2.49866e-06	1.66577e-06	0.172812
21	0.00010302	4.96517e-06	3.31011e-06	0.343401
22	0.000122905	5.92353e-06	3.94902e-06	0.409683
23	9.25131e-05	4.45877e-06	2.97251e-06	0.308377
24	4.44129e-05	2.14053e-06	1.42702e-06	0.148043
25	8.72457e-05	4.2049e-06	2.80327e-06	0.290819
26	9.1309e-05	4.40073e-06	2.93382e-06	0.304363
27	6.73092e-05	3.24404e-06	2.16269e-06	0.224364
28	0.00010605	5.11118e-06	3.40745e-06	0.353499
29	0.000143819	6.93152e-06	4.62101e-06	0.479397
30	0.000239177	1.15274e-05	7.68492e-06	0.797256
31	7.75739e-05	3.73876e-06	2.49251e-06	0.25858
32	8.51587e-05	4.10432e-06	2.73621e-06	0.283862
33	9.13706e-05	4.4037e-06	2.9358e-06	0.304569
34	7.12011e-05	3.43162e-06	2.28774e-06	0.237337
35	0.000213139	1.02724e-05	6.84829e-06	0.710462
36	0.000156777	7.55603e-06	5.03735e-06	0.522589
37	5.53301e-05	2.66669e-06	1.7778e-06	0.184434
38	0.000149651	7.2126e-06	4.8084e-06	0.498837
39	0.000117124	5.64491e-06	3.76327e-06	0.390413
40	0.000126645	6.10378e-06	4.06919e-06	0.422149
41	7.60881e-05	3.66715e-06	2.44477e-06	0.253627
42	0.000101456	4.8898e-06	3.25987e-06	0.338188
43	0.000129725	6.25225e-06	4.16817e-06	0.432418
44	7.658e-05	3.69085e-06	2.46057e-06	0.255267
45	0.000106646	5.13994e-06	3.42662e-06	0.355488
46	6.03447e-05	2.90838e-06	1.93892e-06	0.201149
47	4.77225e-05	2.30004e-06	1.53336e-06	0.159075
48	0.000163381	7.87431e-06	5.24954e-06	0.544602
49	4.22898e-05	2.0382e-06	1.3588e-06	0.140966
50	0.0001228	5.91847e-06	3.94565e-06	0.409333
51	4.59717e-05	2.21566e-06	1.4771e-06	0.153239
52	5.00594e-05	2.41267e-06	1.60844e-06	0.166865
53	4.33525e-05	2.08942e-06	1.39295e-06	0.144508
54	7.18222e-05	3.46155e-06	2.3077e-06	0.239407
55	5.42121e-05	2.61281e-06	1.74187e-06	0.180707
56	5.5063e-05	2.65382e-06	1.76921e-06	0.183543
57	0.000104224	5.02317e-06	3.34878e-06	0.347412
58	6.58461e-05	3.17353e-06	2.11568e-06	0.219487
59	8.71915e-05	4.20229e-06	2.80153e-06	0.290638
60	0.00010365	4.99554e-06	3.33036e-06	0.345501
61	9.01358e-05	4.34419e-06	2.89613e-06	0.300453
62	0.00014698	7.08384e-06	4.72256e-06	0.489932
63	0.000148332	7.14903e-06	4.76602e-06	0.49444
64	0.000116659	5.6225e-06	3.74833e-06	0.388863
65	7.97614e-05	3.84419e-06	2.56279e-06	0.265871
66	9.41986e-05	4.54e-06	3.02667e-06	0.313995
67	0.000122485	5.90327e-06	3.93552e-06	0.408282
68	6.75776e-05	3.25697e-06	2.17132e-06	0.225259
69	9.5747e-05	4.61463e-06	3.07642e-06	0.319157
70	4.93546e-05	2.3787e-06	1.5858e-06	0.164515
71	0.000120259	5.796e-06	3.864e-06	0.400862
72	7.01407e-05	3.38051e-06	2.25367e-06	0.233802
73	0.00012274	5.91559e-06	3.94372e-06	0.409133
74	0.000110732	5.33683e-06	3.55788e-06	0.369105
75	8.6807e-05	4.18376e-06	2.78917e-06	0.289357
76	5.11414e-05	2.46481e-06	1.64321e-06	0.170471
77	0.000121222	5.84243e-06	3.89495e-06	0.404073
78	0.00016815	8.10417e-06	5.40278e-06	0.5605
79	9.52382e-05	4.59011e-06	3.06007e-06	0.317461
80	9.90751e-05	4.77503e-06	3.18335e-06	0.33025
81	6.33993e-05	3.0556e-06	2.03706e-06	0.211331
82	8.53505e-05	4.11356e-06	2.74237e-06	0.284502
83	0.000111403	5.3692e-06	3.57947e-06	0.371344
84	0.000126474	6.09553e-06	4.06369e-06	0.421578
85	0.000115333	5.55859e-06	3.70573e-06	0.384443
86	0.000142328	6.85963e-06	4.57309e-06	0.474425
87	8.01421e-05	3.86253e-06	2.57502e-06	0.26714
88	0.000104782	5.05006e-06	3.36671e-06	0.349272
89	3.86925e-05	1.86483e-06	1.24322e-06	0.128975
90	0.000140786	6.78534e-06	4.52356e-06	0.469287
91	0.000101539	4.89378e-06	3.26252e-06	0.338463
92	8.6641e-05	4.17575e-06	2.78384e-06	0.288803
93	0.000111647	5.38096e-06	3.58731e-06	0.372157
94	0.000123955	5.97413e-06	3.98275e-06	0.413182
95	0.000100317	4.83489e-06	3.22326e-06	0.334391
96	0.000124162	5.98413e-06	3.98942e-06	0.413874
97	7.19765e-05	3.46898e-06	2.31266e-06	0.239922
98	0.00012132	5.84717e-06	3.89811e-06	0.404401
99	0.000125581	6.05251e-06	4.035e-06	0.418603
100	5.95827e-05	2.87165e-06	1.91443e-06	0.198609
101	9.04473e-05	4.3592e-06	2.90614e-06	0.301491
102	0.000112729	5.43312e-06	3.62208e-06	0.375765
103	7.87648e-05	3.79615e-06	2.53077e-06	0.262549
104	5.93455e-05	2.86022e-06	1.90681e-06	0.197818
105	8.33365e-05	4.01649e-06	2.67766e-06	0.277788
106	0.000183153	8.82726e-06	5.88484e-06	0.610511
107	0.000107552	5.1836e-06	3.45574e-06	0.358508
108	0.000128546	6.19542e-06	4.13028e-06	0.428487
109	0.000134562	6.48537e-06	4.32358e-06	0.448541
110	0.000209007	1.00733e-05	6.71553e-06	0.696688
111	0.000125053	6.02706e-06	4.01804e-06	0.416843
112	6.78877e-05	3.27192e-06	2.18128e-06	0.226292
113	7.77331e-05	3.74643e-06	2.49762e-06	0.25911
114	5.75031e-05	2.77142e-06	1.84762e-06	0.191677
115	6.96649e-05	3.35757e-06	2.23838e-06	0.232216
116	0.00015303	7.37543e-06	4.91695e-06	0.510099
117	9.78675e-05	4.71683e-06	3.14455e-06	0.326225
118	9.58765e-05	4.62087e-06	3.08058e-06	0.319588
119	8.55482e-05	4.12309e-06	2.74872e-06	0.285161
120	7.92824e-05	3.8211e-06	2.5474e-06	0.264275
121	6.30243e-05	3.03753e-06	2.02502e-06	0.210081
122	0.000139837	6.73958e-06	4.49305e-06	0.466122
123	0.000102618	4.94578e-06	3.29719e-06	0.34206
124	7.3161e-05	3.52607e-06	2.35072e-06	0.24387
125	0.000140824	6.78717e-06	4.52478e-06	0.469413
126	7.69549e-05	3.70892e-06	2.47261e-06	0.256516
127	0.0001729	8.33309e-06	5.55539e-06	0.576332
128	4.68696e-05	2.25893e-06	1.50595e-06	0.156232
129	0.000195774	9.43553e-06	6.29035e-06	0.652579
130	0.000102649	4.9473e-06	3.2982e-06	0.342164
131	0.000169561	8.17216e-06	5.4481e-06	0.565202
132	7.8176e-05	3.76778e-06	2.51185e-06	0.260587
133	6.72081e-05	3.23917e-06	2.15944e-06	0.224027
134	0.000176359	8.49981e-06	5.66654e-06	0.587863
135	8.2849e-05	3.993e-06	2.662e-06	0.276163
136	0.000150252	7.24158e-06	4.82772e-06	0.500841
137	6.6494e-05	3.20475e-06	2.1365e-06	0.221647
138	9.17211e-05	4.4206e-06	2.94706e-06	0.305737
139	0.000128398	6.18827e-06	4.12551e-06	0.427992
140	0.000126685	6.10571e-06	4.07047e-06	0.422283
141	0.000150143	7.23631e-06	4.82421e-06	0.500477
142	0.000171771	8.27868e-06	5.51912e-06	0.57257
143	0.000101185	4.87672e-06	3.25114e-06	0.337283
144	8.74763e-05	4.21601e-06	2.81068e-06	0.291588
145	0.000113561	5.47318e-06	3.64879e-06	0.378536
146	0.000121704	5.86565e-06	3.91043e-06	0.40568
147	9.81301e-05	4.72949e-06	3.15299e-06	0.3271
148	9.94407e-05	4.79265e-06	3.1951e-06	0.331469
149	7.99418e-05	3.85288e-06	2.56859e-06	0.266473
150	0.000126753	6.10902e-06	4.07268e-06	0.422511
151	5.47306e-05	2.6378e-06	1.75853e-06	0.182435
152	0.000106427	5.12937e-06	3.41958e-06	0.354757
153	5.86197e-05	2.82524e-06	1.88349e-06	0.195399
154	4.00353e-05	1.92955e-06	1.28636e-06	0.133451
155	5.3224e-05	2.56519e-06	1.71013e-06	0.177413
156	0.000146875	7.07881e-06	4.71921e-06	0.489584
157	0.000175602	8.46332e-06	5.64222e-06	0.58534
158	6.81185e-05	3.28304e-06	2.1887e-06	0.227062
159	6.86543e-05	3.30887e-06	2.20591e-06	0.228848
160	5.57042e-05	2.68472e-06	1.78982e-06	0.185681
161	8.36694e-05	4.03254e-06	2.68836e-06	0.278898
162	0.0001998	9.62959e-06	6.41972e-06	0.666001
163	6.9092e-05	3.32997e-06	2.21998e-06	0.230307
164	0.000108507	5.22959e-06	3.48639e-06	0.361688
165	3.60067e-05	1.73538e-06	1.15692e-06	0.120022
166	8.54151e-05	4.11667e-06	2.74445e-06	0.284717
167	0.000116798	5.62919e-06	3.75279e-06	0.389325
168	7.74081e-05	3.73077e-06	2.48718e-06	0.258027
169	0.000151196	7.28703e-06	4.85802e-06	0.503985
170	9.61193e-05	4.63257e-06	3.08838e-06	0.320398
171	0.000105255	5.07286e-06	3.38191e-06	0.350849
172	0.00011812	5.69293e-06	3.79529e-06	0.393734
173	5.60033e-05	2.69914e-06	1.79943e-06	0.186678
174	0.000116908	5.63451e-06	3.75634e-06	0.389694
175	8.54187e-05	4.11685e-06	2.74456e-06	0.284729
176	8.30158e-05	4.00103e-06	2.66736e-06	0.276719
177	0.000224887	1.08387e-05	7.22578e-06	0.749623
178	0.000152838	7.3662e-06	4.9108e-06	0.509461
179	0.000146044	7.03874e-06	4.6925e-06	0.486813
180	8.19482e-05	3.94958e-06	2.63306e-06	0.273161
181	0.000182953	8.81763e-06	5.87842e-06	0.609844
182	6.90768e-05	3.32923e-06	2.21949e-06	0.230256
183	0.00013753	6.62843e-06	4.41895e-06	0.458435
184	4.49605e-05	2.16692e-06	1.44461e-06	0.149868
185	8.4385e-05	4.06702e-06	2.71135e-06	0.281283
186	5.17027e-05	2.49187e-06	1.66125e-06	0.172342
187	6.09049e-05	2.93538e-06	1.95692e-06	0.203016
188	7.80604e-05	3.7622e-06	2.50814e-06	0.260201
189	0.000128391	6.18794e-06	4.12529e-06	0.42797
190	4.80279e-05	2.31475e-06	1.54317e-06	0.160093
191	0.000145803	7.02713e-06	4.68476e-06	0.48601
192	4.14799e-05	1.99917e-06	1.33278e-06	0.138266
193	0.000139933	6.74422e-06	4.49615e-06	0.466443
194	8.47125e-05	4.08281e-06	2.72187e-06	0.282375
195	0.000147321	7.10029e-06	4.73353e-06	0.49107
196	0.000137449	6.6245e-06	4.41633e-06	0.458163
197	4.04959e-05	1.95174e-06	1.30116e-06	0.134986
198	0.000107296	5.17123e-06	3.44749e-06	0.357652
199	0.000109487	5.27687e-06	3.51791e-06	0.364958
200	0.000226377	1.09105e-05	7.27365e-06	0.754589
201	0.000177357	8.54792e-06	5.69861e-06	0.59119
202	8.80074e-05	4.24161e-06	2.82774e-06	0.293358
203	0.000147994	7.13275e-06	4.75517e-06	0.493315
204	7.02493e-05	3.38574e-06	2.25716e-06	0.234164
205	7.6136e-05	3.66946e-06	2.44631e-06	0.253787
206	0.00030441	1.46714e-05	9.78092e-06	1.0147
207	0.0002103	1.01356e-05	6.75709e-06	0.701
208	7.37514e-05	3.55453e-06	2.36969e-06	0.245838
209	0.000133426	6.4306e-06	4.28707e-06	0.444753
210	0.000324447	1.56371e-05	1.04247e-05	1.08149
211	5.25012e-05	2.53035e-06	1.6869e-06	0.175004
212	8.71878e-05	4.20211e-06	2.80141e-06	0.290626
213	8.87706e-05	4.2784e-06	2.85226e-06	0.295902
214	0.000113458	5.46823e-06	3.64548e-06	0.378193
215	6.82179e-05	3.28784e-06	2.19189e-06	0.227393
216	7.51189e-05	3.62044e-06	2.41363e-06	0.250396
217	9.28278e-05	4.47394e-06	2.98262e-06	0.309426
218	0.000119559	5.76229e-06	3.84153e-06	0.398531
219	7.77607e-05	3.74776e-06	2.49851e-06	0.259202
220	0.000101635	4.89842e-06	3.26561e-06	0.338784
221	6.30651e-05	3.03949e-06	2.02633e-06	0.210217
222	8.74298e-05	4.21377e-06	2.80918e-06	0.291433
223	0.000124023	5.97742e-06	3.98495e-06	0.41341
224	0.000180007	8.67565e-06	5.78377e-06	0.600025
225	9.78512e-05	4.71604e-06	3.14403e-06	0.326171
226	0.000246781	1.18939e-05	7.92924e-06	0.822602
227	5.81168e-05	2.801e-06	1.86733e-06	0.193723
228	0.000141656	6.82729e-06	4.55152e-06	0.472188
229	6.83564e-05	3.29451e-06	2.19634e-06	0.227855
230	0.000130582	6.29354e-06	4.19569e-06	0.435273
231	7.83584e-05	3.77657e-06	2.51771e-06	0.261195
232	9.45051e-05	4.55477e-06	3.03652e-06	0.315017
233	6.27917e-05	3.02632e-06	2.01754e-06	0.209306
234	0.000135955	6.55247e-06	4.36832e-06	0.453182
235	9.41221e-05	4.53632e-06	3.02421e-06	0.31374
236	6.95608e-05	3.35256e-06	2.23504e-06	0.231869
237	0.000247536	1.19302e-05	7.95349e-06	0.825118
238	7.1667e-05	3.45407e-06	2.30271e-06	0.23889
239	0.000148415	7.15302e-06	4.76868e-06	0.494717
240	8.07191e-05	3.89034e-06	2.59356e-06	0.269064
241	7.30774e-05	3.52205e-06	2.34803e-06	0.243591
242	7.42877e-05	3.58038e-06	2.38692e-06	0.247626
243	4.84712e-05	2.33612e-06	1.55742e-06	0.161571
244	0.000104728	5.04746e-06	3.36497e-06	0.349092
245	0.000111642	5.38069e-06	3.58713e-06	0.372139
246	9.39877e-05	4.52984e-06	3.01989e-06	0.313292
247	0.000195475	9.42113e-06	6.28075e-06	0.651584
248	3.37842e-05	1.62826e-06	1.08551e-06	0.112614
249	7.53703e-05	3.63255e-06	2.4217e-06	0.251234
250	0.000102873	4.9581e-06	3.3054e-06	0.342912
251	9.1749e-05	4.42194e-06	2.94796e-06	0.30583
252	6.4473e-05	3.10735e-06	2.07156e-06	0.21491
253	0.000175495	8.45818e-06	5.63878e-06	0.584984
254	0.000205299	9.89461e-06	6.59641e-06	0.68433
255	6.97495e-05	3.36165e-06	2.2411e-06	0.232498
256	8.33431e-05	4.01681e-06	2.67787e-06	0.27781
257	7.39537e-05	3.56428e-06	2.37618e-06	0.246512
258	0.00023519	1.13352e-05	7.55683e-06	0.783968
259	3.77439e-05	1.81911e-06	1.21274e-06	0.125813
260	3.56501e-05	1.71819e-06	1.14546e-06	0.118834
261	3.39967e-05	1.63851e-06	1.09234e-06	0.113322
262	0.000271574	1.30888e-05	8.72588e-06	0.905248
263	0.000132559	6.38881e-06	4.25921e-06	0.441862
264	7.5436e-05	3.63572e-06	2.42381e-06	0.251453
265	9.64911e-05	4.65049e-06	3.10033e-06	0.321637
266	0.000127721	6.15563e-06	4.10376e-06	0.425736
267	8.4429e-05	4.06915e-06	2.71276e-06	0.28143
268	0.00013334	6.42646e-06	4.28431e-06	0.444466
269	8.77743e-05	4.23038e-06	2.82025e-06	0.292581
270	8.46642e-05	4.08048e-06	2.72032e-06	0.282214
271	0.000213162	1.02736e-05	6.84906e-06	0.710541
272	9.72994e-05	4.68945e-06	3.1263e-06	0.324331
273	9.63777e-05	4.64503e-06	3.09669e-06	0.321259
274	8.59463e-05	4.14227e-06	2.76152e-06	0.286488
275	0.000106669	5.14103e-06	3.42735e-06	0.355564
276	0.000258336	1.24508e-05	8.30051e-06	0.861119
277	5.02841e-05	2.4235e-06	1.61567e-06	0.167614
278	9.18512e-05	4.42687e-06	2.95124e-06	0.306171
279	5.15759e-05	2.48576e-06	1.65717e-06	0.17192
280	8.87667e-05	4.27821e-06	2.85214e-06	0.295889
281	5.00128e-05	2.41042e-06	1.60695e-06	0.166709
282	6.85485e-05	3.30377e-06	2.20251e-06	0.228495
283	0.00011928	5.74881e-06	3.83254e-06	0.397599
284	8.37287e-05	4.0354e-06	2.69026e-06	0.279096
285	0.00010778	5.19459e-06	3.46306e-06	0.359268
286	0.000104778	5.0499e-06	3.3666e-06	0.349261
287	0.000185966	8.96282e-06	5.97522e-06	0.619886
288	0.000112859	5.43937e-06	3.62625e-06	0.376197
289	0.000103804	5.00295e-06	3.3353e-06	0.346014
290	0.000156126	7.52466e-06	5.01644e-06	0.52042
291	8.99105e-05	4.33333e-06	2.88889e-06	0.299702
292	0.000118465	5.70954e-06	3.80636e-06	0.394883
293	0.00015142	7.29783e-06	4.86522e-06	0.504732
294	0.000163082	7.85989e-06	5.23993e-06	0.543605
295	8.00834e-05	3.8597e-06	2.57314e-06	0.266945
296	0.000100114	4.82509e-06	3.21673e-06	0.333713
297	4.54516e-05	2.19059e-06	1.46039e-06	0.151505
298	0.000152578	7.35365e-06	4.90243e-06	0.508592
299	8.57338e-05	4.13203e-06	2.75469e-06	0.285779
300	9.73152e-05	4.69021e-06	3.12681e-06	0.324384
301	5.5092e-05	2.65522e-06	1.77015e-06	0.18364
302	0.00014316	6.89974e-06	4.59983e-06	0.477199
303	0.000115935	5.58759e-06	3.72506e-06	0.386449
304	0.00010013	4.82588e-06	3.21725e-06	0.333767
305	5.81432e-05	2.80228e-06	1.86818e-06	0.193811
306	9.92743e-05	4.78463e-06	3.18976e-06	0.330914
307	4.27735e-05	2.06152e-06	1.37434e-06	0.142578
308	0.00012314	5.93484e-06	3.95656e-06	0.410465
309	0.000157097	7.57146e-06	5.04764e-06	0.523657
310	9.90123e-05	4.772e-06	3.18134e-06	0.330041
311	0.000134006	6.45858e-06	4.30572e-06	0.446688
312	0.000110311	5.31656e-06	3.54437e-06	0.367704
313	6.37601e-05	3.07299e-06	2.04866e-06	0.212534
314	0.000158424	7.63541e-06	5.09027e-06	0.528079
315	0.000108993	5.25302e-06	3.50201e-06	0.363309
316	0.000102457	4.93805e-06	3.29203e-06	0.341525
317	0.000144607	6.96948e-06	4.64632e-06	0.482022
318	4.84914e-05	2.33709e-06	1.55806e-06	0.161638
319	8.14374e-05	3.92496e-06	2.61664e-06	0.271458
320	9.55975e-05	4.60743e-06	3.07162e-06	0.318658
321	0.000105814	5.09981e-06	3.39987e-06	0.352713
322	0.000104845	5.05312e-06	3.36875e-06	0.349483
323	0.000159173	7.67153e-06	5.11435e-06	0.530578
324	7.86794e-05	3.79204e-06	2.52803e-06	0.262265
325	3.92523e-05	1.89181e-06	1.2612e-06	0.130841
326	0.000157164	7.57471e-06	5.04981e-06	0.523882
327	5.3332e-05	2.5704e-06	1.7136e-06	0.177773
328	0.000139915	6.74334e-06	4.49556e-06	0.466382
329	0.000142883	6.88638e-06	4.59092e-06	0.476275
330	0.000119723	5.77017e-06	3.84678e-06	0.399076
331	0.000132988	6.40952e-06	4.27301e-06	0.443294
332	9.28553e-05	4.47526e-06	2.98351e-06	0.309518
333	9.19885e-05	4.43349e-06	2.95566e-06	0.306628
334	8.43692e-05	4.06626e-06	2.71084e-06	0.281231
335	0.000117347	5.65567e-06	3.77045e-06	0.391157
336	9.4759e-05	4.56701e-06	3.04467e-06	0.315863
337	0.000175104	8.43932e-06	5.62621e-06	0.58368
338	0.000123861	5.96961e-06	3.97974e-06	0.41287
339	8.97071e-05	4.32353e-06	2.88235e-06	0.299024
340	9.13939e-05	4.40483e-06	2.93655e-06	0.304646
341	8.77332e-05	4.22839e-06	2.81893e-06	0.292444
342	0.000136167	6.5627e-06	4.37514e-06	0.453889
343	0.00010368	4.99697e-06	3.33131e-06	0.3456
344	6.17886e-05	2.97797e-06	1.98531e-06	0.205962
345	7.62752e-05	3.67617e-06	2.45078e-06	0.254251
346	9.01591e-05	4.34532e-06	2.89688e-06	0.30053
347	0.000141664	6.82765e-06	4.55177e-06	0.472213
348	7.38069e-05	3.5572e-06	2.37147e-06	0.246023
349	0.0001094	5.27266e-06	3.5151e-06	0.364667
350	0.000150006	7.22968e-06	4.81979e-06	0.500019
351	4.66774e-05	2.24967e-06	1.49978e-06	0.155591
352	5.09938e-05	2.4577e-06	1.63847e-06	0.169979
353	0.000120089	5.78779e-06	3.85853e-06	0.400295
354	5.54572e-05	2.67282e-06	1.78188e-06	0.184857
355	8.6228e-05	4.15585e-06	2.77057e-06	0.287427
356	0.000205819	9.91966e-06	6.6131e-06	0.686062
357	0.000102901	4.95943e-06	3.30628e-06	0.343003
358	0.000115409	5.56225e-06	3.70817e-06	0.384696
359	9.28841e-05	4.47665e-06	2.98443e-06	0.309614
360	6.47935e-05	3.12279e-06	2.08186e-06	0.215978
361	0.000132129	6.36809e-06	4.24539e-06	0.440429
362	0.000146097	7.04129e-06	4.69419e-06	0.486989
363	5.92918e-05	2.85763e-06	1.90509e-06	0.197639
364	0.000123876	5.97032e-06	3.98021e-06	0.412919
365	7.79207e-05	3.75547e-06	2.50365e-06	0.259736
366	4.56711e-05	2.20117e-06	1.46745e-06	0.152237
367	0.00011065	5.33288e-06	3.55526e-06	0.368833
368	9.89721e-05	4.77006e-06	3.18004e-06	0.329907
369	0.000117226	5.64985e-06	3.76657e-06	0.390754
370	8.11317e-05	3.91023e-06	2.60682e-06	0.270439
371	0.000138268	6.66396e-06	4.44264e-06	0.460892
372	8.63447e-05	4.16148e-06	2.77432e-06	0.287816
373	0.000115813	5.58173e-06	3.72115e-06	0.386043
374	0.000124654	6.00785e-06	4.00524e-06	0.415515
375	0.000113902	5.48961e-06	3.65974e-06	0.379672
376	0.000161296	7.77382e-06	5.18254e-06	0.537652
377	5.38052e-05	2.5932e-06	1.7288e-06	0.179351
378	7.27439e-05	3.50597e-06	2.33732e-06	0.24248
379	8.4109e-05	4.05372e-06	2.70248e-06	0.280363
380	5.26982e-05	2.53984e-06	1.69323e-06	0.175661
381	2.11393e-05	1.01883e-06	6.7922e-07	0.0704642
382	0.000110143	5.30844e-06	3.53896e-06	0.367142
383	0.000164214	7.91447e-06	5.27632e-06	0.54738
384	0.000102782	4.9537e-06	3.30246e-06	0.342607
385	4.09134e-05	1.97186e-06	1.31458e-06	0.136378
386	5.38543e-05	2.59556e-06	1.73038e-06	0.179514
387	0.00016253	7.83331e-06	5.2222e-06	0.541767
388	0.000130208	6.27551e-06	4.18367e-06	0.434026
389	9.35392e-05	4.50822e-06	3.00548e-06	0.311797
390	9.76748e-05	4.70754e-06	3.13836e-06	0.325583
391	0.000159171	7.67141e-06	5.11427e-06	0.53057
392	7.04975e-05	3.3977e-06	2.26514e-06	0.234992
393	0.000116419	5.61093e-06	3.74062e-06	0.388063
394	6.97912e-05	3.36366e-06	2.24244e-06	0.232637
395	0.000109077	5.2571e-06	3.50474e-06	0.363591
396	0.00015805	7.61737e-06	5.07825e-06	0.526832
397	8.09055e-05	3.89933e-06	2.59955e-06	0.269685
398	8.67613e-05	4.18155e-06	2.7877e-06	0.289204
399	0.000197321	9.5101e-06	6.34007e-06	0.657737
400	0.00010437	5.03024e-06	3.35349e-06	0.347901
401	7.54155e-05	3.63473e-06	2.42316e-06	0.251385
402	7.79419e-05	3.75649e-06	2.50433e-06	0.259806
403	0.000129384	6.23581e-06	4.15721e-06	0.431281
404	6.6548e-05	3.20735e-06	2.13824e-06	0.221827
405	7.94806e-05	3.83065e-06	2.55377e-06	0.264935
406	0.00013244	6.38311e-06	4.25541e-06	0.441468
407	5.31097e-05	2.55968e-06	1.70645e-06	0.177032
408	0.000125955	6.07056e-06	4.04704e-06	0.419852
409	0.00010623	5.11989e-06	3.41326e-06	0.354101
410	0.00017072	8.22803e-06	5.48535e-06	0.569066
411	0.000110869	5.34345e-06	3.5623e-06	0.369563
412	0.000141839	6.83607e-06	4.55738e-06	0.472796
413	8.66605e-05	4.1767e-06	2.78446e-06	0.288868
414	0.000116492	5.61443e-06	3.74296e-06	0.388305
415	8.81996e-05	4.25088e-06	2.83392e-06	0.293999
416	7.74337e-05	3.732e-06	2.488e-06	0.258112
417	8.07751e-05	3.89304e-06	2.59536e-06	0.26925
418	0.000100396	4.83872e-06	3.22581e-06	0.334655
419	9.77885e-05	4.71302e-06	3.14202e-06	0.325962
420	4.77105e-05	2.29946e-06	1.53297e-06	0.159035
421	7.76159e-05	3.74078e-06	2.49385e-06	0.25872
422	4.06026e-05	1.95689e-06	1.30459e-06	0.135342
423	0.000133586	6.4383e-06	4.2922e-06	0.445285
424	8.64346e-05	4.16581e-06	2.77721e-06	0.288115
425	6.29945e-05	3.03609e-06	2.02406e-06	0.209982
426	8.64569e-05	4.16688e-06	2.77792e-06	0.28819
427	8.60381e-05	4.1467e-06	2.76447e-06	0.286794
428	0.000176458	8.5046e-06	5.66973e-06	0.588195
429	0.000160724	7.74628e-06	5.16418e-06	0.535747
430	0.000132168	6.36999e-06	4.24666e-06	0.440561
431	7.47374e-05	3.60205e-06	2.40137e-06	0.249125
432	5.00187e-05	2.41071e-06	1.60714e-06	0.166729
433	6.49752e-05	3.13155e-06	2.0877e-06	0.216584
434	6.05186e-05	2.91676e-06	1.94451e-06	0.201729
435	8.73178e-05	4.20837e-06	2.80558e-06	0.291059
436	0.000102986	4.96352e-06	3.30901e-06	0.343287
437	0.000101017	4.86864e-06	3.24576e-06	0.336724
438	5.47098e-05	2.6368e-06	1.75786e-06	0.182366
439	6.61347e-05	3.18743e-06	2.12496e-06	0.220449
440	0.000103544	4.99041e-06	3.32694e-06	0.345146
441	0.000105446	5.0821e-06	3.38807e-06	0.351488
442	7.08674e-05	3.41553e-06	2.27702e-06	0.236225
443	8.3777e-05	4.03772e-06	2.69182e-06	0.279257
444	6.85925e-05	3.30589e-06	2.20393e-06	0.228642
445	0.000245591	1.18365e-05	7.89102e-06	0.818638
446	6.67154e-05	3.21542e-06	2.14361e-06	0.222385
447	9.61419e-05	4.63366e-06	3.08911e-06	0.320473
448	5.83344e-05	2.81149e-06	1.87433e-06	0.194448
449	0.000103427	4.98477e-06	3.32318e-06	0.344756
450	6.21506e-05	2.99542e-06	1.99694e-06	0.207169
451	7.16956e-05	3.45545e-06	2.30363e-06	0.238985
452	6.89128e-05	3.32133e-06	2.21422e-06	0.229709
453	9.51468e-05	4.5857e-06	3.05713e-06	0.317156
454	9.46991e-05	4.56413e-06	3.04275e-06	0.315664
455	8.85736e-05	4.2689e-06	2.84593e-06	0.295245
456	9.87311e-05	4.75845e-06	3.1723e-06	0.329104
457	0.000140941	6.79281e-06	4.52854e-06	0.469804
458	4.16803e-05	2.00883e-06	1.33922e-06	0.138934
459	0.000116286	5.60455e-06	3.73636e-06	0.387621
460	4.47122e-05	2.15495e-06	1.43663e-06	0.149041
461	7.65188e-05	3.6879e-06	2.4586e-06	0.255063
462	5.77054e-05	2.78117e-06	1.85411e-06	0.192351
463	0.000181125	8.7295e-06	5.81967e-06	0.603749
464	6.14237e-05	2.96038e-06	1.97359e-06	0.204746
465	8.28062e-05	3.99093e-06	2.66062e-06	0.276021
466	0.000118506	5.7115e-06	3.80767e-06	0.395018
467	0.000116289	5.60466e-06	3.73644e-06	0.387629
468	3.18122e-05	1.53323e-06	1.02215e-06	0.106041
469	4.81257e-05	2.31947e-06	1.54631e-06	0.160419
470	6.32756e-05	3.04964e-06	2.03309e-06	0.210919
471	6.31779e-05	3.04493e-06	2.02995e-06	0.210593
472	7.3894e-05	3.5614e-06	2.37427e-06	0.246313
473	4.05719e-05	1.9554e-06	1.3036e-06	0.13524
474	0.000145812	7.02756e-06	4.68504e-06	0.486039
475	6.78467e-05	3.26994e-06	2.17996e-06	0.226156
476	0.000138413	6.67096e-06	4.44731e-06	0.461377
477	7.34601e-05	3.54049e-06	2.36033e-06	0.244867
478	6.71379e-05	3.23579e-06	2.15719e-06	0.223793
479	0.000139127	6.70539e-06	4.47026e-06	0.463757
480	0.000129577	6.24508e-06	4.16339e-06	0.431922
481	6.57365e-05	3.16824e-06	2.11216e-06	0.219122
482	0.000159142	7.67002e-06	5.11335e-06	0.530473
483	0.000112874	5.4401e-06	3.62673e-06	0.376247
484	6.74124e-05	3.24901e-06	2.16601e-06	0.224708
485	0.000141255	6.80791e-06	4.53861e-06	0.470848
486	7.3212e-05	3.52853e-06	2.35235e-06	0.24404
487	0.000126532	6.09834e-06	4.06556e-06	0.421773
488	4.50518e-05	2.17132e-06	1.44755e-06	0.150173
489	9.6348e-05	4.64359e-06	3.09573e-06	0.32116
490	0.00011169	5.38301e-06	3.58867e-06	0.372299
491	0.000133948	6.45577e-06	4.30384e-06	0.446493
492	7.66217e-05	3.69286e-06	2.46191e-06	0.255406
493	9.60128e-05	4.62744e-06	3.08496e-06	0.320043
494	7.89638e-05	3.80574e-06	2.53716e-06	0.263213
495	7.05267e-05	3.39911e-06	2.26607e-06	0.235089
496	6.03955e-05	2.91082e-06	1.94055e-06	0.201318
497	7.24586e-05	3.49222e-06	2.32815e-06	0.241529
498	0.000103886	5.0069e-06	3.33793e-06	0.346287
499	0.000122386	5.89851e-06	3.93234e-06	0.407953
500	0.000192702	9.28747e-06	6.19165e-06	0.642339
501	8.95675e-05	4.3168e-06	2.87787e-06	0.298558
502	0.000140483	6.77073e-06	4.51382e-06	0.468277
503	9.12642e-05	4.39858e-06	2.93238e-06	0.304214
504	9.3546e-05	4.50855e-06	3.0057e-06	0.31182
505	8.94371e-05	4.31052e-06	2.87368e-06	0.298124
506	0.000132284	6.37557e-06	4.25038e-06	0.440946
507	8.45095e-05	4.07303e-06	2.71535e-06	0.281698
508	3.91648e-05	1.88759e-06	1.25839e-06	0.130549
509	0.000122062	5.88291e-06	3.92194e-06	0.406873
510	0.000110236	5.31295e-06	3.54197e-06	0.367454
511	9.26157e-05	4.46371e-06	2.97581e-06	0.308719
512	0.000101574	4.89547e-06	3.26365e-06	0.33858
513	0.000108975	5.25217e-06	3.50145e-06	0.36325
514	7.05729e-05	3.40134e-06	2.26756e-06	0.235243
515	0.000118027	5.68844e-06	3.79229e-06	0.393424
516	0.000125145	6.03148e-06	4.02099e-06	0.417149
517	8.80529e-05	4.24381e-06	2.8292e-06	0.29351
518	7.81764e-05	3.7678e-06	2.51186e-06	0.260588
519	6.69342e-05	3.22597e-06	2.15064e-06	0.223114
520	0.000114247	5.50625e-06	3.67083e-06	0.380823
521	0.000182105	8.77677e-06	5.85118e-06	0.607018
522	8.79441e-05	4.23856e-06	2.82571e-06	0.293147
523	4.49765e-05	2.16769e-06	1.44513e-06	0.149922
524	5.37581e-05	2.59093e-06	1.72728e-06	0.179194
525	8.01247e-05	3.86169e-06	2.57446e-06	0.267082
526	7.23686e-05	3.48788e-06	2.32526e-06	0.241229
527	0.000111383	5.36821e-06	3.57881e-06	0.371276
528	0.000165151	7.95961e-06	5.30641e-06	0.550502
529	4.82321e-05	2.3246e-06	1.54973e-06	0.160774
530	4.18475e-05	2.01688e-06	1.34459e-06	0.139492
531	9.97105e-05	4.80565e-06	3.20377e-06	0.332368
532	7.9804e-05	3.84624e-06	2.56416e-06	0.266013
533	0.00010572	5.09529e-06	3.39686e-06	0.3524
534	9.32579e-05	4.49466e-06	2.99644e-06	0.31086
535	7.80436e-05	3.76139e-06	2.5076e-06	0.260145
536	0.000280822	1.35345e-05	9.02302e-06	0.936075
537	0.000118735	5.72258e-06	3.81505e-06	0.395785
538	0.000210428	1.01418e-05	6.7612e-06	0.701427
539	0.000117865	5.68062e-06	3.78708e-06	0.392883
540	6.7349e-05	3.24596e-06	2.16397e-06	0.224497
541	0.000103592	4.99274e-06	3.32849e-06	0.345307
542	5.27268e-05	2.54123e-06	1.69415e-06	0.175756
543	0.000178515	8.60374e-06	5.73583e-06	0.595051
544	8.38139e-05	4.0395e-06	2.693e-06	0.27938
545	8.97162e-05	4.32397e-06	2.88265e-06	0.299054
546	4.27492e-05	2.06035e-06	1.37356e-06	0.142497
547	8.52936e-05	4.11082e-06	2.74055e-06	0.284312
548	9.07261e-05	4.37264e-06	2.9151e-06	0.30242
549	6.44734e-05	3.10737e-06	2.07158e-06	0.214911
550	9.64355e-05	4.64781e-06	3.09854e-06	0.321452
551	6.53501e-05	3.14962e-06	2.09975e-06	0.217834
552	6.69352e-05	3.22602e-06	2.15068e-06	0.223117
553	6.53782e-05	3.15097e-06	2.10065e-06	0.217927
554	6.5158e-05	3.14036e-06	2.09357e-06	0.217193
555	0.00019122	9.21605e-06	6.14403e-06	0.6374
556	5.0852e-05	2.45087e-06	1.63391e-06	0.169507
557	0.000114947	5.53997e-06	3.69332e-06	0.383155
558	0.000119405	5.75486e-06	3.83657e-06	0.398017
559	0.000117139	5.64566e-06	3.76377e-06	0.390465
560	9.60658e-05	4.62999e-06	3.08666e-06	0.320219
561	4.993e-05	2.40643e-06	1.60429e-06	0.166433
562	5.633e-05	2.71488e-06	1.80992e-06	0.187767
563	7.52979e-05	3.62906e-06	2.41938e-06	0.250993
564	9.72311e-05	4.68616e-06	3.1241e-06	0.324104
565	5.98313e-05	2.88364e-06	1.92242e-06	0.199438
566	6.80449e-05	3.2795e-06	2.18633e-06	0.226816
567	0.000241617	1.1645e-05	7.76334e-06	0.805391
568	0.000141845	6.83637e-06	4.55758e-06	0.472817
569	5.04367e-05	2.43085e-06	1.62057e-06	0.168122
570	0.000110503	5.32581e-06	3.55054e-06	0.368343
571	0.000167062	8.05173e-06	5.36782e-06	0.556873
572	2.90523e-05	1.40021e-06	9.33471e-07	0.0968409
573	6.30043e-05	3.03656e-06	2.02437e-06	0.210014
574	8.76501e-05	4.22439e-06	2.81626e-06	0.292167
575	3.65881e-05	1.7634e-06	1.1756e-06	0.12196
576	7.91209e-05	3.81332e-06	2.54221e-06	0.263736
577	0.000156061	7.52155e-06	5.01436e-06	0.520205
578	6.71867e-05	3.23814e-06	2.15876e-06	0.223956
579	0.000118889	5.72997e-06	3.81998e-06	0.396296
580	0.000139471	6.72195e-06	4.4813e-06	0.464903
581	6.26894e-05	3.02138e-06	2.01425e-06	0.208965
582	0.000104982	5.05972e-06	3.37315e-06	0.34994
583	5.48906e-05	2.64551e-06	1.76367e-06	0.182969
584	8.48744e-05	4.09061e-06	2.72708e-06	0.282915
585	5.92637e-05	2.85628e-06	1.90418e-06	0.197546
586	9.51307e-05	4.58493e-06	3.05662e-06	0.317102
587	0.000124005	5.97655e-06	3.98437e-06	0.41335
588	0.000156889	7.56146e-06	5.04097e-06	0.522965
589	0.000144443	6.96159e-06	4.64106e-06	0.481477
590	7.40174e-05	3.56735e-06	2.37823e-06	0.246725
591	3.78997e-05	1.82662e-06	1.21774e-06	0.126332
592	5.91988e-05	2.85315e-06	1.9021e-06	0.197329
593	0.000150411	7.24923e-06	4.83282e-06	0.50137
594	7.19459e-05	3.46751e-06	2.31167e-06	0.23982
595	4.59497e-05	2.2146e-06	1.4764e-06	0.153166
596	5.1156e-05	2.46552e-06	1.64368e-06	0.17052
597	0.000166429	8.02121e-06	5.34747e-06	0.554762
598	8.39269e-05	4.04495e-06	2.69663e-06	0.279756
599	8.52848e-05	4.11039e-06	2.74026e-06	0.284283
600	6.59212e-05	3.17714e-06	2.11809e-06	0.219737
601	0.000189457	9.13107e-06	6.08738e-06	0.631522
602	0.000107198	5.16653e-06	3.44435e-06	0.357327
603	0.000130698	6.29914e-06	4.19943e-06	0.435661
604	6.65934e-05	3.20954e-06	2.13969e-06	0.221978
605	0.000113475	5.46905e-06	3.64603e-06	0.37825
606	0.000106273	5.12195e-06	3.41463e-06	0.354244
607	5.50918e-05	2.65521e-06	1.77014e-06	0.183639
608	7.26706e-05	3.50244e-06	2.33496e-06	0.242235
609	7.6399e-05	3.68213e-06	2.45475e-06	0.254663
610	0.000108395	5.22423e-06	3.48282e-06	0.361318
611	9.32738e-05	4.49543e-06	2.99695e-06	0.310913
612	8.355e-05	4.02678e-06	2.68452e-06	0.2785
613	0.000134605	6.48744e-06	4.32496e-06	0.448684
614	4.94707e-05	2.38429e-06	1.58953e-06	0.164902
615	0.000104815	5.05166e-06	3.36777e-06	0.349382
616	0.000104064	5.01547e-06	3.34364e-06	0.346879
617	8.55434e-05	4.12286e-06	2.74857e-06	0.285145
618	6.01983e-05	2.90132e-06	1.93421e-06	0.200661
619	0.000156486	7.542e-06	5.028e-06	0.521619
620	4.89841e-05	2.36084e-06	1.57389e-06	0.16328
621	8.27201e-05	3.98678e-06	2.65786e-06	0.275734
622	0.000154523	7.44741e-06	4.96494e-06	0.515077
623	5.29218e-05	2.55062e-06	1.70041e-06	0.176406
624	7.10268e-05	3.42321e-06	2.28214e-06	0.236756
625	0.0001485	7.15712e-06	4.77141e-06	0.495
626	9.81112e-05	4.72858e-06	3.15238e-06	0.327037
627	7.26864e-05	3.5032e-06	2.33547e-06	0.242288
628	0.000135344	6.52305e-06	4.3487e-06	0.451147
629	0.00018476	8.90469e-06	5.93646e-06	0.615865
630	6.46155e-05	3.11421e-06	2.07614e-06	0.215385
631	5.14901e-05	2.48162e-06	1.65442e-06	0.171634
632	8.64368e-05	4.16592e-06	2.77728e-06	0.288123
633	7.23813e-05	3.48849e-06	2.32566e-06	0.241271
634	0.000107017	5.15779e-06	3.43852e-06	0.356722
635	0.000167164	8.05666e-06	5.37111e-06	0.557214
636	3.48687e-05	1.68053e-06	1.12036e-06	0.116229
637	0.0001488	7.17157e-06	4.78104e-06	0.495999
638	8.20829e-05	3.95607e-06	2.63738e-06	0.27361
639	0.000276169	1.33103e-05	8.87351e-06	0.920563
640	6.00762e-05	2.89544e-06	1.93029e-06	0.200254
641	0.000134118	6.46396e-06	4.30931e-06	0.44706
642	6.45289e-05	3.11004e-06	2.07336e-06	0.215096
643	5.84551e-05	2.81731e-06	1.87821e-06	0.19485
644	5.4393e-05	2.62153e-06	1.74768e-06	0.18131
645	0.000119068	5.73859e-06	3.82573e-06	0.396892
646	7.6911e-05	3.70681e-06	2.4712e-06	0.25637
647	8.8849e-05	4.28217e-06	2.85478e-06	0.296163
648	6.31682e-05	3.04446e-06	2.02964e-06	0.210561
649	0.000121004	5.83192e-06	3.88795e-06	0.403347
650	7.84731e-05	3.7821e-06	2.5214e-06	0.261577
651	0.000117637	5.66965e-06	3.77977e-06	0.392124
652	0.000123856	5.96935e-06	3.97957e-06	0.412852
653	5.20842e-05	2.51026e-06	1.6735e-06	0.173614
654	0.000161756	7.79602e-06	5.19735e-06	0.539188
655	0.000175658	8.46601e-06	5.64401e-06	0.585526
656	0.000130619	6.29533e-06	4.19689e-06	0.435397
657	7.13423e-05	3.43842e-06	2.29228e-06	0.237808
658	0.000116623	5.62079e-06	3.7472e-06	0.388745
659	0.000172899	8.33308e-06	5.55538e-06	0.576332
660	0.000145112	6.99383e-06	4.66256e-06	0.483707
661	6.55361e-05	3.15858e-06	2.10572e-06	0.218454
662	9.12744e-05	4.39907e-06	2.93271e-06	0.304248
663	3.53614e-05	1.70428e-06	1.13619e-06	0.117871
664	7.32213e-05	3.52898e-06	2.35265e-06	0.244071
665	9.02693e-05	4.35062e-06	2.90042e-06	0.300898
666	0.00011279	5.43604e-06	3.62403e-06	0.375967
667	8.10256e-05	3.90512e-06	2.60341e-06	0.270085
668	7.20162e-05	3.4709e-06	2.31393e-06	0.240054
669	7.25824e-05	3.49819e-06	2.33212e-06	0.241941
670	0.000161661	7.79141e-06	5.19427e-06	0.538869
671	9.30809e-05	4.48614e-06	2.99076e-06	0.31027
672	0.000101183	4.87662e-06	3.25108e-06	0.337276
673	0.000141402	6.81503e-06	4.54336e-06	0.471341
674	5.40237e-05	2.60373e-06	1.73582e-06	0.180079
675	5.95468e-05	2.86992e-06	1.91328e-06	0.198489
676	6.39146e-05	3.08043e-06	2.05362e-06	0.213049
677	0.000130077	6.2692e-06	4.17947e-06	0.43359
678	7.48591e-05	3.60792e-06	2.40528e-06	0.24953
679	4.11986e-05	1.98561e-06	1.32374e-06	0.137329
680	0.000155007	7.47075e-06	4.9805e-06	0.516691
681	0.000103939	5.00948e-06	3.33965e-06	0.346465
682	0.000133995	6.45805e-06	4.30537e-06	0.446651
683	8.72272e-05	4.20401e-06	2.80267e-06	0.290757
684	6.07361e-05	2.92724e-06	1.95149e-06	0.202454
685	6.40994e-05	3.08934e-06	2.05956e-06	0.213665
686	9.10227e-05	4.38694e-06	2.92462e-06	0.303409
687	0.000107108	5.1622e-06	3.44147e-06	0.357028
688	5.00039e-05	2.40999e-06	1.60666e-06	0.16668
689	5.19396e-05	2.50329e-06	1.66886e-06	0.173132
690	0.000125463	6.04681e-06	4.0312e-06	0.418209
691	9.01582e-05	4.34527e-06	2.89685e-06	0.300527
692	4.72845e-05	2.27893e-06	1.51929e-06	0.157615
693	0.000144332	6.95625e-06	4.6375e-06	0.481107
694	3.96459e-05	1.91078e-06	1.27385e-06	0.132153
695	0.000136931	6.59956e-06	4.39971e-06	0.456438
696	8.65199e-05	4.16992e-06	2.77995e-06	0.2884
697	0.000103418	4.98435e-06	3.3229e-06	0.344727
698	6.73031e-05	3.24375e-06	2.1625e-06	0.224344
699	0.000101625	4.89793e-06	3.26529e-06	0.338751
700	0.000112398	5.41714e-06	3.61143e-06	0.37466
701	8.76339e-05	4.22361e-06	2.81574e-06	0.292113
702	8.96546e-05	4.321e-06	2.88067e-06	0.298849
703	0.000237807	1.14614e-05	7.64092e-06	0.792691
704	8.66634e-05	4.17684e-06	2.78456e-06	0.288878
705	0.00010307	4.96758e-06	3.31172e-06	0.343567
706	0.000111216	5.36018e-06	3.57345e-06	0.37072
707	0.000103791	5.00232e-06	3.33488e-06	0.34597
708	8.25257e-05	3.97742e-06	2.65161e-06	0.275086
709	5.19803e-05	2.50525e-06	1.67016e-06	0.173268
710	5.32623e-05	2.56704e-06	1.71136e-06	0.177541
711	0.00015668	7.55135e-06	5.03423e-06	0.522266
712	5.99363e-05	2.8887e-06	1.9258e-06	0.199788
713	8.4128e-05	4.05464e-06	2.70309e-06	0.280427
714	6.25294e-05	3.01367e-06	2.00912e-06	0.208431
715	6.18958e-05	2.98313e-06	1.98876e-06	0.206319
716	0.000185817	8.95564e-06	5.97043e-06	0.619389
717	8.87284e-05	4.27636e-06	2.85091e-06	0.295761
718	7.1645e-05	3.45301e-06	2.30201e-06	0.238817
719	4.16277e-05	2.00629e-06	1.33753e-06	0.138759
720	8.24821e-05	3.97531e-06	2.65021e-06	0.27494
721	3.55766e-05	1.71465e-06	1.1431e-06	0.118589
722	6.41764e-05	3.09305e-06	2.06203e-06	0.213921
723	0.000143227	6.90299e-06	4.60199e-06	0.477424
724	0.000144354	6.9573e-06	4.6382e-06	0.481181
725	6.93712e-05	3.34342e-06	2.22895e-06	0.231237
726	0.000106907	5.15252e-06	3.43501e-06	0.356358
727	8.16935e-05	3.93731e-06	2.62487e-06	0.272312
728	0.00010241	4.93575e-06	3.2905e-06	0.341366
729	0.000163688	7.8891e-06	5.2594e-06	0.545625
730	6.92678e-05	3.33844e-06	2.22562e-06	0.230893
731	8.72315e-05	4.20422e-06	2.80281e-06	0.290772
732	0.000220714	1.06375e-05	7.0917e-06	0.735713
733	0.000113839	5.48657e-06	3.65771e-06	0.379462
734	6.03402e-05	2.90816e-06	1.93877e-06	0.201134
735	6.64977e-05	3.20493e-06	2.13662e-06	0.221659
736	5.63849e-05	2.71753e-06	1.81169e-06	0.18795
737	9.94819e-05	4.79464e-06	3.19642e-06	0.331606
738	8.1596e-05	3.93261e-06	2.62174e-06	0.271987
739	0.000121764	5.86854e-06	3.91236e-06	0.40588
740	0.000130302	6.28003e-06	4.18669e-06	0.434339
741	6.56855e-05	3.16579e-06	2.11052e-06	0.218952
742	0.0001219	5.87512e-06	3.91675e-06	0.406334
743	0.000180855	8.71648e-06	5.81099e-06	0.602849
744	9.89004e-05	4.76661e-06	3.17774e-06	0.329668
745	5.6724e-05	2.73387e-06	1.82258e-06	0.18908
746	0.000121504	5.85604e-06	3.90403e-06	0.405015
747	8.57545e-05	4.13303e-06	2.75535e-06	0.285848
748	0.000130219	6.27604e-06	4.18403e-06	0.434063
749	0.000111836	5.39006e-06	3.59338e-06	0.372787
750	8.42877e-05	4.06234e-06	2.70822e-06	0.280959
751	0.000114958	5.54052e-06	3.69368e-06	0.383193
752	0.000154622	7.45218e-06	4.96812e-06	0.515407
753	0.0001823	8.78615e-06	5.85743e-06	0.607667
754	0.000118741	5.72284e-06	3.81522e-06	0.395802
755	0.000113842	5.48675e-06	3.65784e-06	0.379474
756	6.71725e-05	3.23745e-06	2.1583e-06	0.223908
757	7.32917e-05	3.53237e-06	2.35492e-06	0.244306
758	0.000140254	6.7597e-06	4.50647e-06	0.467514
759	0.000119751	5.77153e-06	3.84768e-06	0.39917
760	0.000114885	5.53702e-06	3.69135e-06	0.382951
761	6.93307e-05	3.34147e-06	2.22764e-06	0.231102
762	8.15146e-05	3.92869e-06	2.61912e-06	0.271715
763	0.000179545	8.65335e-06	5.7689e-06	0.598482
764	6.57658e-05	3.16965e-06	2.1131e-06	0.219219
765	0.000100989	4.86727e-06	3.24485e-06	0.33663
766	0.000105114	5.0661e-06	3.3774e-06	0.350381
767	4.24335e-05	2.04513e-06	1.36342e-06	0.141445
768	9.54245e-05	4.59908e-06	3.06606e-06	0.318082
769	0.000203043	9.78589e-06	6.52393e-06	0.676811
770	9.19573e-05	4.43198e-06	2.95465e-06	0.306524
771	0.000107414	5.17693e-06	3.45128e-06	0.358046
772	0.000134699	6.49198e-06	4.32799e-06	0.448998
773	0.000154253	7.43438e-06	4.95625e-06	0.514176
774	0.000107126	5.16308e-06	3.44205e-06	0.357088
775	0.000130612	6.29498e-06	4.19666e-06	0.435373
776	8.53998e-05	4.11593e-06	2.74396e-06	0.284666
777	7.8294e-05	3.77347e-06	2.51564e-06	0.26098
778	9.23333e-05	4.4501e-06	2.96674e-06	0.307778
779	6.91201e-05	3.33132e-06	2.22088e-06	0.2304
780	5.15819e-05	2.48604e-06	1.65736e-06	0.17194
781	8.4433e-05	4.06934e-06	2.71289e-06	0.281443
782	0.000201076	9.69107e-06	6.46071e-06	0.670253
783	0.000101697	4.9014e-06	3.2676e-06	0.33899
784	0.000110334	5.31764e-06	3.54509e-06	0.367778
785	5.77357e-05	2.78264e-06	1.85509e-06	0.192452
786	8.8989e-05	4.28892e-06	2.85928e-06	0.29663
787	0.000102775	4.95337e-06	3.30224e-06	0.342584
788	5.58944e-05	2.69389e-06	1.79593e-06	0.186315
789	8.35545e-05	4.027e-06	2.68467e-06	0.278515
790	7.83125e-05	3.77436e-06	2.51624e-06	0.261042
791	0.00016288	7.85019e-06	5.23346e-06	0.542935
792	8.51592e-05	4.10434e-06	2.73623e-06	0.283864
793	0.000146978	7.08377e-06	4.72251e-06	0.489927
794	0.000171393	8.26049e-06	5.507e-06	0.571312
795	0.000158444	7.63638e-06	5.09092e-06	0.528147
796	0.00015229	7.33976e-06	4.89318e-06	0.507632
797	6.44149e-05	3.10455e-06	2.0697e-06	0.214716
798	8.29341e-05	3.9971e-06	2.66473e-06	0.276447
799	0.000112709	5.43214e-06	3.62142e-06	0.375697
800	0.000115281	5.55608e-06	3.70405e-06	0.384269
801	0.00027547	1.32766e-05	8.85107e-06	0.918235
802	0.000156732	7.55387e-06	5.03591e-06	0.52244
803	8.0994e-05	3.9036e-06	2.6024e-06	0.26998
804	8.47783e-05	4.08598e-06	2.72399e-06	0.282594
805	8.67082e-05	4.179e-06	2.786e-06	0.289027
806	0.000100961	4.86591e-06	3.24394e-06	0.336536
807	0.000184716	8.90257e-06	5.93505e-06	0.615719
808	6.0947e-05	2.9374e-06	1.95827e-06	0.203157
809	0.000184826	8.90791e-06	5.9386e-06	0.616088
810	4.67857e-05	2.25489e-06	1.50326e-06	0.155952
811	0.000205613	9.90974e-06	6.6065e-06	0.685377
812	3.45982e-05	1.6675e-06	1.11167e-06	0.115327
813	0.000141755	6.83206e-06	4.5547e-06	0.472518
814	9.17939e-05	4.4241e-06	2.9494e-06	0.30598
815	0.000138365	6.66866e-06	4.44577e-06	0.461217
816	5.92142e-05	2.85389e-06	1.9026e-06	0.197381
817	7.14492e-05	3.44357e-06	2.29572e-06	0.238164
818	7.36974e-05	3.55192e-06	2.36795e-06	0.245658
819	0.000116165	5.59868e-06	3.73246e-06	0.387216
820	0.000108408	5.22484e-06	3.48323e-06	0.36136
821	8.20229e-05	3.95318e-06	2.63546e-06	0.27341
822	0.000151288	7.29149e-06	4.86099e-06	0.504294
823	9.83889e-05	4.74196e-06	3.16131e-06	0.327963
824	6.86183e-05	3.30713e-06	2.20475e-06	0.228728
825	7.15283e-05	3.44738e-06	2.29825e-06	0.238428
826	5.91186e-05	2.84928e-06	1.89952e-06	0.197062
827	3.46523e-05	1.6701e-06	1.1134e-06	0.115508
828	9.00874e-05	4.34186e-06	2.89457e-06	0.300291
829	8.04789e-05	3.87877e-06	2.58585e-06	0.268263
830	7.43813e-05	3.58489e-06	2.38993e-06	0.247938
831	0.000165672	7.98476e-06	5.32317e-06	0.552241
832	0.000122764	5.91676e-06	3.94451e-06	0.409215
833	0.000125061	6.02743e-06	4.01829e-06	0.416868
834	4.96009e-05	2.39057e-06	1.59371e-06	0.165336
835	0.00011337	5.46399e-06	3.64266e-06	0.3779
836	0.000202089	9.73991e-06	6.49327e-06	0.673631
837	0.000139522	6.72442e-06	4.48294e-06	0.465074
838	7.01728e-05	3.38205e-06	2.2547e-06	0.233909
839	0.000149339	7.19753e-06	4.79836e-06	0.497795
840	4.84736e-05	2.33624e-06	1.55749e-06	0.161579
841	3.9646e-05	1.91078e-06	1.27385e-06	0.132153
842	0.000110173	5.3099e-06	3.53993e-06	0.367243
843	3.54278e-05	1.70748e-06	1.13832e-06	0.118093
844	9.94558e-05	4.79338e-06	3.19559e-06	0.331519
845	0.00014937	7.19903e-06	4.79935e-06	0.497899
846	9.53907e-05	4.59746e-06	3.06497e-06	0.317969
847	0.000113665	5.47821e-06	3.65214e-06	0.378883
848	0.000122329	5.89578e-06	3.93052e-06	0.407764
849	6.73772e-05	3.24732e-06	2.16488e-06	0.224591
850	0.000100659	4.85136e-06	3.23424e-06	0.335529
851	7.88177e-05	3.7987e-06	2.53247e-06	0.262726
852	0.000136561	6.58172e-06	4.38781e-06	0.455204
853	0.00010544	5.08178e-06	3.38785e-06	0.351465
854	7.44594e-05	3.58865e-06	2.39243e-06	0.248198
855	0.00010125	4.87987e-06	3.25325e-06	0.337501
856	9.09301e-05	4.38248e-06	2.92165e-06	0.3031
857	0.000110094	5.30609e-06	3.5374e-06	0.36698
858	0.000103083	4.96818e-06	3.31212e-06	0.343609
859	8.12877e-05	3.91775e-06	2.61183e-06	0.270959
860	9.83451e-05	4.73985e-06	3.1599e-06	0.327817
861	0.000133508	6.43458e-06	4.28972e-06	0.445028
862	0.000109224	5.26419e-06	3.50946e-06	0.364081
863	0.000289094	1.39332e-05	9.2888e-06	0.963646
864	0.000282195	1.36007e-05	9.06713e-06	0.94065
865	9.1728e-05	4.42093e-06	2.94729e-06	0.30576
866	6.86318e-05	3.30778e-06	2.20519e-06	0.228773
867	0.000237424	1.14429e-05	7.6286e-06	0.791413
868	0.0001105	5.32566e-06	3.55044e-06	0.368333
869	0.000108885	5.24785e-06	3.49857e-06	0.362952
870	0.000138796	6.6894e-06	4.4596e-06	0.462652
871	8.64823e-05	4.16811e-06	2.77874e-06	0.288274
872	7.15024e-05	3.44613e-06	2.29742e-06	0.238341
873	0.00012111	5.83704e-06	3.89136e-06	0.403701
874	8.15327e-05	3.92956e-06	2.6197e-06	0.271776
875	3.99134e-05	1.92367e-06	1.28245e-06	0.133045
876	6.37759e-05	3.07375e-06	2.04917e-06	0.212586
877	4.38436e-05	2.11309e-06	1.40873e-06	0.146145
878	5.34155e-05	2.57442e-06	1.71628e-06	0.178052
879	9.30913e-05	4.48664e-06	2.99109e-06	0.310304
880	9.10734e-05	4.38938e-06	2.92625e-06	0.303578
881	0.000121208	5.84177e-06	3.89451e-06	0.404028
882	0.000115402	5.56194e-06	3.70796e-06	0.384675
883	0.000179907	8.67081e-06	5.78054e-06	0.59969
884	4.83417e-05	2.32988e-06	1.55325e-06	0.161139
885	0.000112221	5.40862e-06	3.60575e-06	0.374071
886	4.13096e-05	1.99096e-06	1.32731e-06	0.137699
887	0.00010143	4.88852e-06	3.25901e-06	0.338099
888	9.3153e-05	4.48961e-06	2.99307e-06	0.31051
889	0.000118165	5.69509e-06	3.79672e-06	0.393883
890	6.09652e-05	2.93828e-06	1.95886e-06	0.203217
891	4.17905e-05	2.01414e-06	1.34276e-06	0.139302
892	8.89928e-05	4.2891e-06	2.8594e-06	0.296643
893	0.000431675	2.0805e-05	1.387e-05	1.43892
894	0.0001278	6.15948e-06	4.10632e-06	0.426001
895	4.8093e-05	2.3179e-06	1.54526e-06	0.16031
896	9.18554e-05	4.42707e-06	2.95138e-06	0.306185
897	6.42804e-05	3.09806e-06	2.06537e-06	0.214268
898	8.34535e-05	4.02213e-06	2.68142e-06	0.278178
899	0.000170725	8.22828e-06	5.48552e-06	0.569084
900	0.000131839	6.35412e-06	4.23608e-06	0.439463
901	0.00014403	6.94167e-06	4.62778e-06	0.480099
902	6.28476e-05	3.02901e-06	2.01934e-06	0.209492
903	0.000105723	5.09543e-06	3.39695e-06	0.35241
904	8.24853e-05	3.97547e-06	2.65031e-06	0.274951
905	8.53471e-05	4.1134e-06	2.74226e-06	0.28449
906	0.00017486	8.42755e-06	5.61837e-06	0.582866
907	0.000134996	6.50626e-06	4.33751e-06	0.449986
908	0.000125374	6.04253e-06	4.02836e-06	0.417913
909	0.000116967	5.63734e-06	3.75822e-06	0.389889
910	7.82171e-05	3.76976e-06	2.51317e-06	0.260724
911	0.000143823	6.9317e-06	4.62114e-06	0.47941
912	8.19662e-05	3.95045e-06	2.63363e-06	0.273221
913	5.63636e-05	2.71651e-06	1.811e-06	0.187879
914	8.65399e-05	4.17089e-06	2.78059e-06	0.288466
915	5.54339e-05	2.6717e-06	1.78113e-06	0.18478
916	6.85138e-05	3.3021e-06	2.2014e-06	0.228379
917	0.000119849	5.77626e-06	3.85084e-06	0.399498
918	0.000120279	5.79699e-06	3.86466e-06	0.400931
919	0.000121242	5.84337e-06	3.89558e-06	0.404139
920	0.000140144	6.75441e-06	4.50294e-06	0.467148
921	4.97461e-05	2.39757e-06	1.59838e-06	0.16582
922	0.0001541	7.42701e-06	4.95134e-06	0.513666
923	6.67304e-05	3.21614e-06	2.1441e-06	0.222435
924	0.000128527	6.19452e-06	4.12968e-06	0.428425
925	0.000272169	1.31175e-05	8.745e-06	0.907231
926	0.000208782	1.00625e-05	6.70833e-06	0.695942
927	0.000212228	1.02285e-05	6.81903e-06	0.707425
928	6.88707e-05	3.3193e-06	2.21287e-06	0.229569
929	3.90501e-05	1.88206e-06	1.25471e-06	0.130167
930	0.000188751	9.09704e-06	6.06469e-06	0.629169
931	0.000149996	7.22922e-06	4.81948e-06	0.499987
932	9.39189e-05	4.52652e-06	3.01768e-06	0.313063
933	0.000100216	4.83004e-06	3.22002e-06	0.334054
934	0.000104993	5.06023e-06	3.37349e-06	0.349975
935	7.81932e-05	3.76861e-06	2.5124e-06	0.260644
936	0.000139301	6.71376e-06	4.47584e-06	0.464337
937	3.61626e-05	1.74289e-06	1.16193e-06	0.120542
938	3.67341e-05	1.77044e-06	1.18029e-06	0.122447
939	6.5196e-05	3.14219e-06	2.09479e-06	0.21732
940	5.64404e-05	2.72021e-06	1.81347e-06	0.188135
941	9.70182e-05	4.6759e-06	3.11727e-06	0.323394
942	0.000161795	7.7979e-06	5.1986e-06	0.539318
943	8.19131e-05	3.94789e-06	2.63193e-06	0.273044
944	0.000102642	4.94696e-06	3.29797e-06	0.342141
945	0.000146452	7.05839e-06	4.70559e-06	0.488172
946	0.000136683	6.58757e-06	4.39171e-06	0.455609
947	0.000198379	9.56108e-06	6.37405e-06	0.661263
948	0.000110807	5.34045e-06	3.5603e-06	0.369356
949	0.000183015	8.8206e-06	5.8804e-06	0.61005
950	6.49073e-05	3.12828e-06	2.08552e-06	0.216358
951	8.07383e-05	3.89127e-06	2.59418e-06	0.269128
952	0.000109405	5.27287e-06	3.51525e-06	0.364682
953	5.66187e-05	2.7288e-06	1.8192e-06	0.188729
954	0.000105478	5.08364e-06	3.38909e-06	0.351594
955	8.74948e-05	4.21691e-06	2.81127e-06	0.291649
956	5.60157e-05	2.69974e-06	1.79983e-06	0.186719
957	5.11212e-05	2.46384e-06	1.64256e-06	0.170404
958	4.87196e-05	2.3481e-06	1.5654e-06	0.162399
959	0.000155828	7.51029e-06	5.00686e-06	0.519426
960	0.000183772	8.8571e-06	5.90474e-06	0.612574
961	5.76282e-05	2.77745e-06	1.85164e-06	0.192094
962	4.95774e-05	2.38944e-06	1.59296e-06	0.165258
963	7.68966e-05	3.70611e-06	2.47074e-06	0.256322
964	7.94432e-05	3.82885e-06	2.55257e-06	0.264811
965	3.07831e-05	1.48363e-06	9.89084e-07	0.10261
966	8.28128e-05	3.99125e-06	2.66084e-06	0.276043
967	4.81489e-05	2.32059e-06	1.54706e-06	0.160496
968	0.000171345	8.25816e-06	5.50544e-06	0.57115
969	0.000115426	5.56308e-06	3.70872e-06	0.384753
970	9.54808e-05	4.6018e-06	3.06787e-06	0.318269
971	6.49201e-05	3.12889e-06	2.08593e-06	0.2164
972	9.29258e-05	4.47866e-06	2.98577e-06	0.309753
973	6.81768e-05	3.28585e-06	2.19057e-06	0.227256
974	7.56185e-05	3.64451e-06	2.42968e-06	0.252062
975	0.000110585	5.32977e-06	3.55318e-06	0.368617
976	8.08982e-05	3.89898e-06	2.59932e-06	0.269661
977	0.00010293	4.96083e-06	3.30722e-06	0.343101
978	9.18706e-05	4.4278e-06	2.95187e-06	0.306235
979	5.22574e-05	2.5186e-06	1.67907e-06	0.174191
980	7.30236e-05	3.51945e-06	2.3463e-06	0.243412
981	0.000154947	7.46782e-06	4.97855e-06	0.516489
982	0.000100702	4.85344e-06	3.23563e-06	0.335673
983	0.000144702	6.97408e-06	4.64938e-06	0.48234
984	7.66849e-05	3.69591e-06	2.46394e-06	0.255616
985	6.1402e-05	2.95934e-06	1.97289e-06	0.204673
986	4.95096e-05	2.38617e-06	1.59078e-06	0.165032
987	0.000213134	1.02722e-05	6.84813e-06	0.710445
988	0.000117473	5.66176e-06	3.77451e-06	0.391578
989	0.000144786	6.97812e-06	4.65208e-06	0.48262
990	4.5749e-05	2.20492e-06	1.46995e-06	0.152497
991	6.10087e-05	2.94038e-06	1.96025e-06	0.203362
992	8.15308e-05	3.92946e-06	2.61964e-06	0.271769
993	8.11367e-05	3.91047e-06	2.60698e-06	0.270456
994	3.96724e-05	1.91205e-06	1.2747e-06	0.132241
995	9.24589e-05	4.45615e-06	2.97077e-06	0.308196
996	0.000109444	5.27476e-06	3.51651e-06	0.364813
997	8.40725e-05	4.05197e-06	2.70131e-06	0.280242
998	0.000119453	5.75715e-06	3.8381e-06	0.398176
999	0.000127627	6.15111e-06	4.10074e-06	0.425423
1000	0.000116605	5.6199e-06	3.7466e-06	0.388683
1001	0.000170235	8.20466e-06	5.46978e-06	0.56745
1002	9.88862e-05	4.76593e-06	3.17729e-06	0.329621
1003	0.0001087	5.23892e-06	3.49261e-06	0.362333
1004	0.000136043	6.55675e-06	4.37116e-06	0.453477
1005	0.000163233	7.8672e-06	5.2448e-06	0.544111
1006	6.30104e-05	3.03685e-06	2.02457e-06	0.210035
1007	7.41125e-05	3.57193e-06	2.38129e-06	0.247042
1008	0.000143062	6.89503e-06	4.59669e-06	0.476874
1009	0.000144875	6.98242e-06	4.65494e-06	0.482917
1010	8.56947e-05	4.13015e-06	2.75343e-06	0.285649
1011	7.53769e-05	3.63287e-06	2.42192e-06	0.251256
1012	0.000177845	8.57145e-06	5.7143e-06	0.592818
1013	0.000105513	5.08533e-06	3.39022e-06	0.351711
1014	6.33106e-05	3.05132e-06	2.03421e-06	0.211035
1015	4.96099e-05	2.391e-06	1.594e-06	0.165366
1016	5.46886e-05	2.63578e-06	1.75718e-06	0.182295
1017	6.34397e-05	3.05755e-06	2.03836e-06	0.211466
1018	6.70868e-05	3.23332e-06	2.15555e-06	0.223623
1019	7.34575e-05	3.54036e-06	2.36024e-06	0.244858
1020	8.69684e-05	4.19154e-06	2.79436e-06	0.289895
1021	3.03769e-05	1.46405e-06	9.76033e-07	0.101256
1022	8.42134e-05	4.05876e-06	2.70584e-06	0.280711
1023	0.000162585	7.83594e-06	5.22396e-06	0.541949
1024	0.000142674	6.87632e-06	4.58421e-06	0.47558
1025	8.1958e-05	3.95005e-06	2.63337e-06	0.273193
1026	0.000107846	5.19774e-06	3.46516e-06	0.359485
1027	0.000102223	4.92677e-06	3.28451e-06	0.340745
1028	0.000103368	4.98193e-06	3.32128e-06	0.34456
1029	0.0001901	9.16206e-06	6.10804e-06	0.633666
1030	8.28949e-05	3.99521e-06	2.66347e-06	0.276316
1031	8.26494e-05	3.98338e-06	2.65559e-06	0.275498
1032	0.00016241	7.82753e-06	5.21835e-06	0.541367
1033	6.38001e-05	3.07491e-06	2.04994e-06	0.212667
1034	3.61511e-05	1.74234e-06	1.16156e-06	0.120504
1035	6.92286e-05	3.33655e-06	2.22436e-06	0.230762
1036	0.000136263	6.56736e-06	4.37824e-06	0.454211
1037	0.000131337	6.32992e-06	4.21995e-06	0.43779
1038	9.69702e-05	4.67359e-06	3.11572e-06	0.323234
1039	8.6904e-05	4.18843e-06	2.79229e-06	0.28968
1040	8.65294e-05	4.17038e-06	2.78025e-06	0.288431
1041	0.000129289	6.23122e-06	4.15415e-06	0.430963
1042	0.000106958	5.15495e-06	3.43664e-06	0.356527
1043	0.000186584	8.99261e-06	5.99507e-06	0.621946
1044	3.97278e-05	1.91472e-06	1.27648e-06	0.132426
1045	0.000112829	5.43789e-06	3.62526e-06	0.376095
1046	0.000158026	7.61624e-06	5.07749e-06	0.526754
1047	9.27115e-05	4.46833e-06	2.97889e-06	0.309038
1048	5.32626e-05	2.56705e-06	1.71137e-06	0.177542
1049	0.000105378	5.07883e-06	3.38588e-06	0.351261
1050	0.000208087	1.0029e-05	6.68597e-06	0.693622
1051	8.03297e-05	3.87158e-06	2.58105e-06	0.267766
1052	6.72708e-05	3.24219e-06	2.16146e-06	0.224236
1053	0.000109062	5.25636e-06	3.50424e-06	0.36354
1054	0.000153931	7.41889e-06	4.94592e-06	0.513104
1055	8.42914e-05	4.06251e-06	2.70834e-06	0.280971
1056	0.000126361	6.0901e-06	4.06007e-06	0.421203
1057	6.66203e-05	3.21084e-06	2.14056e-06	0.222068
1058	0.000127238	6.13236e-06	4.08824e-06	0.424126
1059	6.48549e-05	3.12575e-06	2.08384e-06	0.216183
1060	5.49265e-05	2.64724e-06	1.76483e-06	0.183088
1061	0.000173939	8.3832e-06	5.5888e-06	0.579798
1062	7.28065e-05	3.50899e-06	2.33933e-06	0.242688
1063	8.52488e-05	4.10866e-06	2.73911e-06	0.284163
1064	3.20451e-05	1.54445e-06	1.02963e-06	0.106817
1065	4.59236e-05	2.21334e-06	1.47556e-06	0.153079
1066	0.000184194	8.87743e-06	5.91829e-06	0.61398
1067	0.000169671	8.17749e-06	5.45166e-06	0.565571
1068	0.00010709	5.16132e-06	3.44088e-06	0.356967
1069	6.21748e-05	2.99658e-06	1.99772e-06	0.207249
1070	0.000139893	6.74231e-06	4.49488e-06	0.466311
1071	3.43606e-05	1.65605e-06	1.10403e-06	0.114535
1072	0.0001045	5.0365e-06	3.35766e-06	0.348334
1073	6.10007e-05	2.94e-06	1.96e-06	0.203336
1074	8.66737e-05	4.17733e-06	2.78489e-06	0.288912
1075	0.000122024	5.88109e-06	3.92072e-06	0.406747
1076	8.57895e-05	4.13472e-06	2.75648e-06	0.285965
1077	0.000139369	6.71703e-06	4.47802e-06	0.464563
1078	6.80059e-05	3.27762e-06	2.18508e-06	0.226686
1079	9.06114e-05	4.36711e-06	2.91141e-06	0.302038
1080	0.000188515	9.0857e-06	6.05713e-06	0.628384
1081	9.76921e-05	4.70838e-06	3.13892e-06	0.32564
1082	0.000132207	6.37186e-06	4.24791e-06	0.44069
1083	7.56738e-05	3.64718e-06	2.43145e-06	0.252246
1084	6.53872e-05	3.15141e-06	2.10094e-06	0.217957
1085	8.93414e-05	4.30591e-06	2.8706e-06	0.297805
1086	8.00193e-05	3.85662e-06	2.57108e-06	0.266731
1087	0.000191377	9.22362e-06	6.14908e-06	0.637924
1088	0.000105958	5.10676e-06	3.4045e-06	0.353193
1089	0.000167171	8.05701e-06	5.37134e-06	0.557238
1090	8.08314e-05	3.89576e-06	2.59717e-06	0.269438
1091	7.06088e-05	3.40307e-06	2.26871e-06	0.235363
1092	0.00010052	4.84469e-06	3.22979e-06	0.335068
1093	9.24347e-05	4.45499e-06	2.96999e-06	0.308116
1094	0.000123592	5.95665e-06	3.9711e-06	0.411973
1095	0.000107238	5.16845e-06	3.44563e-06	0.35746
1096	0.000185405	8.93577e-06	5.95718e-06	0.618015
1097	9.97151e-05	4.80588e-06	3.20392e-06	0.332384
1098	9.91162e-05	4.77701e-06	3.18467e-06	0.330387
1099	0.000115942	5.58796e-06	3.72531e-06	0.386474
1100	8.27077e-05	3.98619e-06	2.65746e-06	0.275692
1101	0.00034834	1.67886e-05	1.11924e-05	1.16113
1102	7.51894e-05	3.62384e-06	2.41589e-06	0.250631
1103	6.78427e-05	3.26975e-06	2.17984e-06	0.226142
1104	6.19824e-05	2.98731e-06	1.99154e-06	0.206608
1105	0.000157016	7.56753e-06	5.04502e-06	0.523385
1106	8.55847e-05	4.12485e-06	2.7499e-06	0.285282
1107	8.86862e-05	4.27433e-06	2.84955e-06	0.295621
1108	6.33976e-05	3.05551e-06	2.03701e-06	0.211325
1109	7.86266e-05	3.78949e-06	2.52633e-06	0.262089
1110	0.000134393	6.47724e-06	4.31816e-06	0.447978
1111	7.19965e-05	3.46995e-06	2.3133e-06	0.239988
1112	0.00011101	5.35023e-06	3.56682e-06	0.370032
1113	6.08296e-05	2.93175e-06	1.9545e-06	0.202765
1114	7.86058e-05	3.78849e-06	2.52566e-06	0.262019
1115	0.000111365	5.36735e-06	3.57823e-06	0.371216
1116	0.000110522	5.32675e-06	3.55117e-06	0.368408
1117	7.51556e-05	3.62221e-06	2.4148e-06	0.250519
1118	0.000108228	5.21617e-06	3.47745e-06	0.36076
1119	0.000108186	5.21414e-06	3.47609e-06	0.36062
1120	0.000130756	6.30194e-06	4.20129e-06	0.435854
1121	6.18578e-05	2.9813e-06	1.98754e-06	0.206193
1122	0.000104398	5.03159e-06	3.35439e-06	0.347994
1123	0.000155331	7.48633e-06	4.99089e-06	0.517769
1124	4.31168e-05	2.07806e-06	1.38537e-06	0.143723
1125	0.000127917	6.16511e-06	4.11007e-06	0.426391
1126	0.000136913	6.59865e-06	4.3991e-06	0.456375
1127	0.000148884	7.1756e-06	4.78373e-06	0.496278
1128	8.67977e-05	4.18331e-06	2.78887e-06	0.289326
1129	4.91274e-05	2.36775e-06	1.5785e-06	0.163758
1130	4.45379e-05	2.14655e-06	1.43104e-06	0.14846
1131	5.83246e-05	2.81102e-06	1.87401e-06	0.194415
1132	9.65948e-05	4.65549e-06	3.10366e-06	0.321983
1133	6.25294e-05	3.01367e-06	2.00911e-06	0.208431
1134	0.000121409	5.85143e-06	3.90095e-06	0.404696
1135	0.000109848	5.29426e-06	3.52951e-06	0.366161
1136	6.47464e-05	3.12052e-06	2.08035e-06	0.215821
1137	9.00833e-05	4.34166e-06	2.89444e-06	0.300278
1138	0.000206511	9.95302e-06	6.63535e-06	0.68837
1139	0.000134124	6.46424e-06	4.30949e-06	0.447079
1140	0.000253383	1.22121e-05	8.14138e-06	0.844611
1141	6.12783e-05	2.95338e-06	1.96892e-06	0.204261
1142	9.25181e-05	4.45901e-06	2.97267e-06	0.308394
1143	0.000144395	6.95926e-06	4.63951e-06	0.481316
1144	6.71956e-05	3.23857e-06	2.15904e-06	0.223985
1145	0.000104288	5.02626e-06	3.35084e-06	0.347626
1146	7.33304e-05	3.53424e-06	2.35616e-06	0.244435
1147	6.42562e-05	3.0969e-06	2.0646e-06	0.214187
1148	0.000208626	1.00549e-05	6.7033e-06	0.695419
1149	3.28084e-05	1.58124e-06	1.05416e-06	0.109361
1150	9.55294e-05	4.60414e-06	3.06943e-06	0.318431
1151	8.59584e-05	4.14286e-06	2.7619e-06	0.286528
1152	7.68306e-05	3.70293e-06	2.46862e-06	0.256102
1153	7.27334e-05	3.50546e-06	2.33698e-06	0.242445
1154	9.78045e-05	4.71379e-06	3.14253e-06	0.326015
1155	0.000146312	7.05167e-06	4.70111e-06	0.487707
1156	7.49515e-05	3.61237e-06	2.40824e-06	0.249838
1157	3.60476e-05	1.73735e-06	1.15824e-06	0.120159
1158	0.000137528	6.62829e-06	4.41886e-06	0.458425
1159	4.85755e-05	2.34115e-06	1.56077e-06	0.161918
1160	0.000105513	5.0853e-06	3.3902e-06	0.351709
1161	0.000108112	5.21057e-06	3.47372e-06	0.360373
1162	0.000100243	4.83131e-06	3.22087e-06	0.334142
1163	9.47664e-05	4.56737e-06	3.04491e-06	0.315888
1164	3.82628e-05	1.84412e-06	1.22941e-06	0.127543
1165	0.000117939	5.68421e-06	3.78947e-06	0.393131
1166	5.4566e-05	2.62987e-06	1.75324e-06	0.181887
1167	6.64725e-05	3.20371e-06	2.13581e-06	0.221575
1168	7.18945e-05	3.46503e-06	2.31002e-06	0.239648
1169	0.000111405	5.3693e-06	3.57953e-06	0.371351
1170	9.22626e-05	4.44669e-06	2.96446e-06	0.307542
1171	0.000123074	5.93168e-06	3.95446e-06	0.410247
1172	2.37624e-05	1.14525e-06	7.63502e-07	0.0792079
1173	9.30167e-05	4.48304e-06	2.98869e-06	0.310056
1174	7.34106e-05	3.5381e-06	2.35874e-06	0.244702
1175	0.000129277	6.23063e-06	4.15375e-06	0.430922
1176	0.000166761	8.03723e-06	5.35816e-06	0.555871
1177	0.00014141	6.81539e-06	4.54359e-06	0.471365
1178	5.32103e-05	2.56453e-06	1.70968e-06	0.177368
1179	0.000122415	5.89993e-06	3.93329e-06	0.408051
1180	0.00026667	1.28524e-05	8.5683e-06	0.8889
1181	0.000143391	6.9109e-06	4.60727e-06	0.477971
1182	8.91069e-05	4.2946e-06	2.86307e-06	0.297023
1183	7.86532e-05	3.79078e-06	2.52718e-06	0.262177
1184	3.24381e-05	1.56339e-06	1.04226e-06	0.108127
1185	9.21855e-05	4.44298e-06	2.96199e-06	0.307285
1186	7.05679e-05	3.4011e-06	2.2674e-06	0.235226
1187	4.80405e-05	2.31536e-06	1.54358e-06	0.160135
1188	9.87584e-05	4.75977e-06	3.17318e-06	0.329195
1189	4.19112e-05	2.01995e-06	1.34664e-06	0.139704
1190	9.26603e-05	4.46586e-06	2.97724e-06	0.308868
1191	5.7107e-05	2.75233e-06	1.83489e-06	0.190357
1192	0.000128663	6.20107e-06	4.13404e-06	0.428878
1193	0.000107499	5.18103e-06	3.45402e-06	0.35833
1194	9.14308e-05	4.4066e-06	2.93774e-06	0.304769
1195	0.000145198	6.99797e-06	4.66531e-06	0.483993
1196	7.44151e-05	3.58651e-06	2.39101e-06	0.24805
1197	9.7927e-05	4.7197e-06	3.14646e-06	0.326423
1198	9.41008e-05	4.53529e-06	3.02353e-06	0.313669
1199	0.000120821	5.82309e-06	3.88206e-06	0.402736
1200	0.000182739	8.8073e-06	5.87153e-06	0.60913
1201	0.000108478	5.22824e-06	3.48549e-06	0.361595
1202	0.000104312	5.02741e-06	3.35161e-06	0.347706
1203	0.000120374	5.80154e-06	3.8677e-06	0.401246
1204	6.75536e-05	3.25582e-06	2.17055e-06	0.225179
1205	8.14047e-05	3.92339e-06	2.61559e-06	0.271349
1206	7.46099e-05	3.59591e-06	2.39727e-06	0.2487
1207	0.000147951	7.13067e-06	4.75378e-06	0.493171
1208	0.000100875	4.8618e-06	3.2412e-06	0.336251
1209	0.00016257	7.83525e-06	5.2235e-06	0.541901
1210	7.45229e-05	3.59171e-06	2.39447e-06	0.24841
1211	9.7329e-05	4.69088e-06	3.12725e-06	0.32443
1212	9.88375e-05	4.76358e-06	3.17572e-06	0.329458
1213	0.000105083	5.06459e-06	3.37639e-06	0.350277
1214	0.000152991	7.37356e-06	4.91571e-06	0.50997
1215	0.000110991	5.34933e-06	3.56622e-06	0.36997
1216	0.000145669	7.02066e-06	4.68044e-06	0.485563
1217	3.51742e-05	1.69526e-06	1.13017e-06	0.117247
1218	7.54123e-05	3.63458e-06	2.42305e-06	0.251374
1219	0.000313387	1.5104e-05	1.00694e-05	1.04462
1220	0.000129649	6.24858e-06	4.16572e-06	0.432164
1221	8.84803e-05	4.2644e-06	2.84293e-06	0.294934
1222	7.80717e-05	3.76275e-06	2.5085e-06	0.260239
1223	6.99158e-05	3.36967e-06	2.24644e-06	0.233053
1224	0.000173308	8.35278e-06	5.56852e-06	0.577694
1225	8.06383e-05	3.88645e-06	2.59097e-06	0.268794
1226	0.000140219	6.75799e-06	4.50533e-06	0.467395
1227	0.000133101	6.41493e-06	4.27662e-06	0.443669
1228	0.000104775	5.04976e-06	3.3665e-06	0.349251
1229	4.27305e-05	2.05944e-06	1.37296e-06	0.142435
1230	0.000100033	4.82119e-06	3.21413e-06	0.333443
1231	0.000160802	7.75001e-06	5.16668e-06	0.536006
1232	0.00013971	6.73349e-06	4.48899e-06	0.465701
1233	8.88899e-05	4.28415e-06	2.8561e-06	0.2963
1234	8.56818e-05	4.12952e-06	2.75302e-06	0.285606
1235	5.93841e-05	2.86208e-06	1.90805e-06	0.197947
1236	6.74601e-05	3.25131e-06	2.16754e-06	0.224867
1237	2.8914e-05	1.39354e-06	9.29028e-07	0.0963801
1238	0.000118023	5.68827e-06	3.79218e-06	0.393411
1239	6.78803e-05	3.27156e-06	2.18104e-06	0.226268
1240	5.39982e-05	2.6025e-06	1.735e-06	0.179994
1241	0.000100051	4.82207e-06	3.21472e-06	0.333504
1242	9.50813e-05	4.58255e-06	3.05503e-06	0.316938
1243	0.000134899	6.50159e-06	4.33439e-06	0.449663
1244	0.000127828	6.16081e-06	4.1072e-06	0.426093
1245	0.00013082	6.30501e-06	4.20334e-06	0.436066
1246	0.000104097	5.01706e-06	3.34471e-06	0.34699
1247	8.49741e-05	4.09542e-06	2.73028e-06	0.283247
1248	6.32194e-05	3.04693e-06	2.03128e-06	0.210731
1249	0.000108098	5.20991e-06	3.47328e-06	0.360328
1250	0.000108908	5.24896e-06	3.49931e-06	0.363028
1251	0.000165717	7.9869e-06	5.3246e-06	0.552389
1252	5.60821e-05	2.70294e-06	1.80196e-06	0.18694
1253	0.000205013	9.88083e-06	6.58722e-06	0.683377
1254	7.62859e-05	3.67668e-06	2.45112e-06	0.254286
1255	0.000139237	6.71068e-06	4.47379e-06	0.464124
1256	0.000119668	5.76752e-06	3.84501e-06	0.398893
1257	5.73805e-05	2.76552e-06	1.84368e-06	0.191268
1258	0.000211171	1.01776e-05	6.78507e-06	0.703902
1259	0.000157832	7.60687e-06	5.07125e-06	0.526106
1260	6.81333e-05	3.28376e-06	2.18917e-06	0.227111
1261	0.000152923	7.37028e-06	4.91352e-06	0.509743
1262	0.000161814	7.79881e-06	5.1992e-06	0.53938
1263	5.69999e-05	2.74717e-06	1.83145e-06	0.19
1264	7.67473e-05	3.69892e-06	2.46595e-06	0.255824
1265	9.7472e-05	4.69777e-06	3.13185e-06	0.324907
1266	7.6811e-05	3.70199e-06	2.46799e-06	0.256037
1267	0.000138587	6.67934e-06	4.45289e-06	0.461956
1268	4.35697e-05	2.09989e-06	1.39992e-06	0.145232
1269	0.000249212	1.20111e-05	8.00737e-06	0.830708
1270	9.3671e-05	4.51458e-06	3.00972e-06	0.312237
1271	7.64983e-05	3.68692e-06	2.45794e-06	0.254994
1272	0.000102785	4.95381e-06	3.30254e-06	0.342615
1273	7.20227e-05	3.47121e-06	2.31414e-06	0.240076
1274	0.000101011	4.86832e-06	3.24555e-06	0.336703
1275	0.000106898	5.15207e-06	3.43471e-06	0.356327
1276	8.17584e-05	3.94043e-06	2.62696e-06	0.272528
1277	0.000105853	5.10169e-06	3.40113e-06	0.352843
1278	0.000101709	4.90197e-06	3.26798e-06	0.33903
1279	6.89528e-05	3.32326e-06	2.2155e-06	0.229843
1280	0.000100392	4.8385e-06	3.22567e-06	0.33464
1281	7.98586e-05	3.84887e-06	2.56591e-06	0.266195
1282	9.49518e-05	4.57631e-06	3.05087e-06	0.316506
1283	4.45177e-05	2.14558e-06	1.43039e-06	0.148392
1284	8.20395e-05	3.95398e-06	2.63599e-06	0.273465
1285	0.00012639	6.09148e-06	4.06099e-06	0.421299
1286	0.000121536	5.85758e-06	3.90505e-06	0.405121
1287	6.01741e-05	2.90016e-06	1.93344e-06	0.20058
1288	4.74326e-05	2.28607e-06	1.52404e-06	0.158109
1289	0.000119499	5.75936e-06	3.83958e-06	0.398329
1290	7.50787e-05	3.6185e-06	2.41233e-06	0.250262
1291	0.000150262	7.24205e-06	4.82803e-06	0.500874
1292	8.84792e-05	4.26435e-06	2.8429e-06	0.294931
1293	9.29479e-05	4.47972e-06	2.98648e-06	0.309826
1294	4.45598e-05	2.14761e-06	1.43174e-06	0.148533
1295	0.000261241	1.25908e-05	8.39385e-06	0.870802
1296	8.66119e-05	4.17435e-06	2.7829e-06	0.288706
1297	6.19647e-05	2.98646e-06	1.99097e-06	0.206549
1298	6.61801e-05	3.18962e-06	2.12641e-06	0.2206
1299	7.65041e-05	3.6872e-06	2.45813e-06	0.255014
1300	0.00010308	4.96806e-06	3.31204e-06	0.3436
1301	0.0001433	6.9065e-06	4.60433e-06	0.477667
1302	5.63131e-05	2.71407e-06	1.80938e-06	0.18771
1303	0.00012001	5.78399e-06	3.85599e-06	0.400032
1304	3.15548e-05	1.52082e-06	1.01388e-06	0.105183
1305	0.00023859	1.14991e-05	7.66606e-06	0.795299
1306	2.68129e-05	1.29228e-06	8.61519e-07	0.0893765
1307	4.92496e-05	2.37364e-06	1.58242e-06	0.164165
1308	3.87259e-05	1.86644e-06	1.24429e-06	0.129086
1309	0.000109381	5.27174e-06	3.51449e-06	0.364604
1310	0.00011356	5.47313e-06	3.64875e-06	0.378532
1311	0.00013364	6.4409e-06	4.29394e-06	0.445465
1312	5.59282e-05	2.69552e-06	1.79701e-06	0.186427
1313	8.67175e-05	4.17944e-06	2.78629e-06	0.289058
1314	5.29651e-05	2.55271e-06	1.70181e-06	0.17655
1315	0.000203253	9.79599e-06	6.53066e-06	0.677509
1316	6.18622e-05	2.98151e-06	1.98768e-06	0.206207
1317	0.000140195	6.75683e-06	4.50455e-06	0.467315
1318	0.00012291	5.92376e-06	3.94917e-06	0.409699
1319	0.000143879	6.93439e-06	4.62293e-06	0.479596
1320	0.000126308	6.08754e-06	4.05836e-06	0.421026
1321	9.57335e-05	4.61398e-06	3.07599e-06	0.319112
1322	4.83007e-05	2.3279e-06	1.55194e-06	0.161002
1323	0.000120784	5.82134e-06	3.88089e-06	0.402615
1324	5.20677e-05	2.50946e-06	1.67297e-06	0.173559
1325	3.69199e-05	1.7794e-06	1.18626e-06	0.123066
1326	6.55122e-05	3.15743e-06	2.10495e-06	0.218374
1327	6.97284e-05	3.36064e-06	2.24042e-06	0.232428
1328	0.000117599	5.66782e-06	3.77855e-06	0.391997
1329	0.000109619	5.28323e-06	3.52215e-06	0.365398
1330	4.96042e-05	2.39073e-06	1.59382e-06	0.165347
1331	3.97237e-05	1.91452e-06	1.27635e-06	0.132412
1332	0.000102723	4.95086e-06	3.30058e-06	0.342411
1333	0.000309579	1.49205e-05	9.947e-06	1.03193
1334	7.61107e-05	3.66824e-06	2.44549e-06	0.253702
1335	8.2741e-05	3.98779e-06	2.65853e-06	0.275803
1336	8.18912e-05	3.94684e-06	2.63122e-06	0.272971
1337	7.8428e-05	3.77992e-06	2.51995e-06	0.261427
1338	0.000157071	7.5702e-06	5.0468e-06	0.52357
1339	6.33341e-05	3.05246e-06	2.03497e-06	0.211114
1340	0.000106726	5.14379e-06	3.42919e-06	0.355755
1341	7.77503e-05	3.74726e-06	2.49817e-06	0.259168
1342	0.000142512	6.86852e-06	4.57902e-06	0.47504
1343	0.000141031	6.79713e-06	4.53142e-06	0.470103
1344	0.000220773	1.06404e-05	7.09359e-06	0.735909
1345	0.000111795	5.3881e-06	3.59206e-06	0.372651
1346	0.000241484	1.16386e-05	7.75905e-06	0.804946
1347	7.01736e-05	3.38209e-06	2.25473e-06	0.233912
1348	8.12317e-05	3.91505e-06	2.61003e-06	0.270772
1349	8.65135e-05	4.16961e-06	2.77974e-06	0.288378
1350	0.000110334	5.31764e-06	3.5451e-06	0.367779
1351	0.000174102	8.39102e-06	5.59401e-06	0.580339
1352	7.42631e-05	3.57919e-06	2.38613e-06	0.247544
1353	8.63073e-05	4.15967e-06	2.77312e-06	0.287691
1354	0.000122715	5.91437e-06	3.94292e-06	0.409049
1355	6.84481e-05	3.29893e-06	2.19929e-06	0.22816
1356	8.7641e-05	4.22395e-06	2.81597e-06	0.292137
1357	0.00010974	5.28903e-06	3.52602e-06	0.3658
1358	0.000157179	7.5754e-06	5.05027e-06	0.523929
1359	0.00010737	5.17481e-06	3.44987e-06	0.3579
1360	0.000106273	5.12196e-06	3.41464e-06	0.354244
1361	0.000110496	5.32547e-06	3.55031e-06	0.36832
1362	6.29263e-05	3.0328e-06	2.02187e-06	0.209754
1363	0.000119392	5.75425e-06	3.83617e-06	0.397975
1364	8.52984e-05	4.11105e-06	2.7407e-06	0.284328
1365	0.000162067	7.811e-06	5.20733e-06	0.540224
1366	4.99978e-05	2.4097e-06	1.60646e-06	0.166659
1367	0.000204274	9.84522e-06	6.56348e-06	0.680914
1368	7.16878e-05	3.45507e-06	2.30338e-06	0.238959
1369	8.80422e-05	4.24329e-06	2.82886e-06	0.293474
1370	8.54301e-05	4.11739e-06	2.74493e-06	0.284767
1371	8.90428e-05	4.29151e-06	2.86101e-06	0.296809
1372	4.89163e-05	2.35758e-06	1.57172e-06	0.163054
1373	0.000176292	8.49658e-06	5.66439e-06	0.58764
1374	4.58309e-05	2.20887e-06	1.47258e-06	0.15277
1375	5.27475e-05	2.54222e-06	1.69481e-06	0.175825
1376	0.000226408	1.0912e-05	7.27466e-06	0.754694
1377	0.000123397	5.94725e-06	3.96483e-06	0.411323
1378	0.000102795	4.95433e-06	3.30288e-06	0.342651
1379	0.000121352	5.84869e-06	3.89913e-06	0.404507
1380	5.81367e-05	2.80196e-06	1.86797e-06	0.193789
1381	8.40903e-05	4.05282e-06	2.70188e-06	0.280301
1382	0.000112598	5.42677e-06	3.61785e-06	0.375326
1383	6.778e-05	3.26673e-06	2.17782e-06	0.225933
1384	0.000137034	6.60451e-06	4.40301e-06	0.456781
1385	0.000190394	9.17623e-06	6.11748e-06	0.634645
1386	0.000111315	5.36497e-06	3.57664e-06	0.371051
1387	0.000142335	6.85999e-06	4.57332e-06	0.47445
1388	0.000178834	8.61911e-06	5.74607e-06	0.596114
1389	0.00020605	9.93082e-06	6.62054e-06	0.686834
1390	7.66706e-05	3.69522e-06	2.46348e-06	0.255569
1391	7.72124e-05	3.72134e-06	2.48089e-06	0.257375
1392	3.49435e-05	1.68414e-06	1.12276e-06	0.116478
1393	5.48138e-05	2.64181e-06	1.76121e-06	0.182713
1394	0.000137583	6.63094e-06	4.42063e-06	0.458608
1395	5.83931e-05	2.81432e-06	1.87621e-06	0.194644
1396	7.83023e-05	3.77387e-06	2.51591e-06	0.261008
1397	2.79278e-05	1.34601e-06	8.97341e-07	0.0930927
1398	0.000158413	7.6349e-06	5.08993e-06	0.528044
1399	0.000139371	6.71711e-06	4.47808e-06	0.464569
1400	0.000126098	6.07741e-06	4.05161e-06	0.420325
1401	0.000168487	8.12043e-06	5.41362e-06	0.561625
1402	3.92488e-05	1.89164e-06	1.26109e-06	0.130829
1403	0.000143674	6.92452e-06	4.61635e-06	0.478913
1404	6.92793e-05	3.33899e-06	2.22599e-06	0.230931
1405	0.000115138	5.54921e-06	3.69948e-06	0.383794
1406	8.33545e-05	4.01736e-06	2.67824e-06	0.277848
1407	8.51512e-05	4.10395e-06	2.73597e-06	0.283837
1408	5.71982e-05	2.75673e-06	1.83782e-06	0.190661
1409	8.53774e-05	4.11486e-06	2.74324e-06	0.284591
1410	0.000211006	1.01697e-05	6.77978e-06	0.703354
1411	6.40008e-05	3.08459e-06	2.05639e-06	0.213336
1412	0.000131959	6.35993e-06	4.23995e-06	0.439865
1413	7.72103e-05	3.72124e-06	2.48082e-06	0.257368
1414	5.1236e-05	2.46937e-06	1.64625e-06	0.170787
1415	7.68975e-05	3.70616e-06	2.47077e-06	0.256325
1416	0.000103143	4.97111e-06	3.31407e-06	0.343811
1417	6.61309e-05	3.18725e-06	2.12483e-06	0.220436
1418	0.000120823	5.82319e-06	3.88213e-06	0.402743
1419	8.84181e-05	4.26141e-06	2.84094e-06	0.294727
1420	9.21024e-05	4.43897e-06	2.95932e-06	0.307008
1421	3.92906e-05	1.89365e-06	1.26244e-06	0.130969
1422	5.588e-05	2.6932e-06	1.79547e-06	0.186267
1423	9.481e-05	4.56947e-06	3.04631e-06	0.316033
1424	0.000114623	5.52437e-06	3.68291e-06	0.382076
1425	6.67405e-05	3.21663e-06	2.14442e-06	0.222468
1426	0.000249252	1.2013e-05	8.00866e-06	0.830842
1427	0.000105724	5.09547e-06	3.39698e-06	0.352412
1428	0.000104438	5.03348e-06	3.35565e-06	0.348125
1429	0.000110938	5.34675e-06	3.5645e-06	0.369792
1430	0.000118952	5.73303e-06	3.82202e-06	0.396507
1431	8.82236e-05	4.25203e-06	2.83469e-06	0.294079
1432	4.2211e-05	2.03441e-06	1.35627e-06	0.140703
1433	5.78475e-05	2.78802e-06	1.85868e-06	0.192825
1434	0.000107946	5.20259e-06	3.46839e-06	0.359821
1435	0.000133944	6.45557e-06	4.30371e-06	0.44648
1436	6.75648e-05	3.25636e-06	2.17091e-06	0.225216
1437	0.000110879	5.34393e-06	3.56262e-06	0.369596
1438	0.000151199	7.28719e-06	4.85813e-06	0.503996
1439	8.738e-05	4.21137e-06	2.80758e-06	0.291267
1440	8.84392e-05	4.26242e-06	2.84162e-06	0.294797
1441	7.31286e-05	3.52451e-06	2.34967e-06	0.243762
1442	0.000158002	7.61507e-06	5.07671e-06	0.526673
1443	9.54785e-05	4.60169e-06	3.06779e-06	0.318262
1444	0.00012144	5.85292e-06	3.90195e-06	0.404799
1445	0.000146159	7.04431e-06	4.6962e-06	0.487198
1446	8.0029e-05	3.85708e-06	2.57139e-06	0.266763
1447	0.000254325	1.22575e-05	8.17165e-06	0.847751
1448	5.43008e-05	2.61708e-06	1.74472e-06	0.181003
1449	8.05264e-05	3.88106e-06	2.58737e-06	0.268421
1450	5.56495e-05	2.68209e-06	1.78806e-06	0.185498
1451	0.000206317	9.94368e-06	6.62912e-06	0.687724
1452	0.0001497	7.21494e-06	4.80996e-06	0.498999
1453	6.90296e-05	3.32696e-06	2.21797e-06	0.230099
1454	0.000170656	8.22493e-06	5.48329e-06	0.568852
1455	6.8826e-05	3.31714e-06	2.21143e-06	0.22942
1456	5.95371e-05	2.86945e-06	1.91297e-06	0.198457
1457	0.000132904	6.40547e-06	4.27032e-06	0.443015
1458	0.000150366	7.24703e-06	4.83135e-06	0.501218
1459	0.000157218	7.57731e-06	5.05154e-06	0.524061
1460	9.78555e-05	4.71625e-06	3.14417e-06	0.326185
1461	0.000125319	6.03987e-06	4.02658e-06	0.417729
1462	0.000118385	5.70569e-06	3.80379e-06	0.394616
1463	0.000146809	7.07562e-06	4.71708e-06	0.489363
1464	0.000361376	1.74169e-05	1.16113e-05	1.20459
1465	3.08459e-05	1.48665e-06	9.91102e-07	0.10282
1466	0.000139753	6.73553e-06	4.49035e-06	0.465842
1467	6.71553e-05	3.23662e-06	2.15775e-06	0.223851
1468	4.19769e-05	2.02312e-06	1.34875e-06	0.139923
1469	8.40045e-05	4.04869e-06	2.69912e-06	0.280015
1470	0.000109525	5.27866e-06	3.51911e-06	0.365082
1471	3.78309e-05	1.8233e-06	1.21553e-06	0.126103
1472	0.000165744	7.98822e-06	5.32548e-06	0.552481
1473	6.69581e-05	3.22712e-06	2.15141e-06	0.223194
1474	3.21275e-05	1.54842e-06	1.03228e-06	0.107092
1475	8.49045e-05	4.09206e-06	2.72804e-06	0.283015
1476	8.34854e-05	4.02367e-06	2.68244e-06	0.278285
1477	0.000138179	6.65969e-06	4.4398e-06	0.460597
1478	6.04047e-05	2.91127e-06	1.94085e-06	0.201349
1479	6.41559e-05	3.09206e-06	2.06138e-06	0.213853
1480	0.000240773	1.16043e-05	7.73622e-06	0.802578
1481	9.72541e-05	4.68727e-06	3.12484e-06	0.32418
1482	0.000102219	4.92654e-06	3.28436e-06	0.340729
1483	0.000163052	7.85849e-06	5.23899e-06	0.543508
1484	0.00013458	6.48625e-06	4.32417e-06	0.448602
1485	6.77242e-05	3.26404e-06	2.17603e-06	0.225747
1486	0.000114427	5.51495e-06	3.67663e-06	0.381424
1487	5.81747e-05	2.80379e-06	1.86919e-06	0.193916
1488	9.89075e-05	4.76696e-06	3.17797e-06	0.329692
1489	0.000114287	5.50819e-06	3.67213e-06	0.380957
1490	7.76422e-05	3.74205e-06	2.4947e-06	0.258807
1491	6.01053e-05	2.89684e-06	1.93123e-06	0.200351
1492	8.58574e-05	4.13799e-06	2.75866e-06	0.286191
1493	7.82122e-05	3.76952e-06	2.51301e-06	0.260707
1494	5.93372e-05	2.85982e-06	1.90655e-06	0.197791
1495	5.89594e-05	2.84161e-06	1.89441e-06	0.196531
1496	7.9631e-05	3.8379e-06	2.5586e-06	0.265437
1497	9.15055e-05	4.41021e-06	2.94014e-06	0.305018
1498	0.000159648	7.69442e-06	5.12961e-06	0.532161
1499	7.08131e-05	3.41292e-06	2.27528e-06	0.236044
1500	0.000134314	6.47343e-06	4.31562e-06	0.447715
1501	9.68581e-05	4.66818e-06	3.11212e-06	0.32286
1502	5.363e-05	2.58475e-06	1.72317e-06	0.178767
1503	0.000142611	6.87329e-06	4.58219e-06	0.47537
1504	9.51936e-05	4.58796e-06	3.05864e-06	0.317312
1505	8.37324e-05	4.03558e-06	2.69038e-06	0.279108
1506	0.000108446	5.22666e-06	3.48444e-06	0.361486
1507	0.000133878	6.4524e-06	4.3016e-06	0.44626
1508	6.84284e-05	3.29798e-06	2.19865e-06	0.228095
1509	9.80029e-05	4.72335e-06	3.1489e-06	0.326676
1510	0.000153082	7.37794e-06	4.91863e-06	0.510273
1511	0.000156354	7.53565e-06	5.02377e-06	0.52118
1512	9.41339e-05	4.53688e-06	3.02459e-06	0.31378
1513	0.000193324	9.31747e-06	6.21165e-06	0.644414
1514	8.94092e-05	4.30917e-06	2.87278e-06	0.298031
1515	0.000130987	6.31306e-06	4.20871e-06	0.436624
1516	0.000112703	5.43185e-06	3.62124e-06	0.375677
1517	8.62889e-05	4.15879e-06	2.77253e-06	0.28763
1518	7.2892e-05	3.51311e-06	2.34207e-06	0.242973
1519	0.000146283	7.05026e-06	4.70018e-06	0.48761
1520	9.41247e-05	4.53644e-06	3.02429e-06	0.313749
1521	9.35219e-05	4.50739e-06	3.00493e-06	0.31174
1522	0.000102591	4.9445e-06	3.29633e-06	0.341971
1523	0.000181377	8.74167e-06	5.82778e-06	0.604591
1524	0.0001081	5.21e-06	3.47333e-06	0.360333
1525	9.35293e-05	4.50775e-06	3.00516e-06	0.311764
1526	0.000226874	1.09344e-05	7.28961e-06	0.756245
1527	8.94181e-05	4.3096e-06	2.87307e-06	0.29806
1528	6.42104e-05	3.09469e-06	2.06313e-06	0.214035
1529	0.000135902	6.54993e-06	4.36662e-06	0.453006
1530	7.21593e-05	3.47779e-06	2.31853e-06	0.240531
1531	4.11251e-05	1.98207e-06	1.32138e-06	0.137084
1532	7.50859e-05	3.61885e-06	2.41256e-06	0.250286
1533	6.51816e-05	3.1415e-06	2.09433e-06	0.217272
1534	7.30821e-05	3.52227e-06	2.34818e-06	0.243607
1535	8.90695e-05	4.2928e-06	2.86187e-06	0.296898
1536	7.18045e-05	3.46069e-06	2.30713e-06	0.239348
1537	6.90222e-05	3.3266e-06	2.21773e-06	0.230074
1538	7.45081e-05	3.591e-06	2.394e-06	0.24836
1539	8.38197e-05	4.03978e-06	2.69319e-06	0.279399
1540	0.000103704	4.99811e-06	3.33208e-06	0.345679
1541	6.32193e-05	3.04692e-06	2.03128e-06	0.210731
1542	0.000130546	6.2918e-06	4.19454e-06	0.435153
1543	8.57917e-05	4.13482e-06	2.75655e-06	0.285972
1544	0.000120556	5.81031e-06	3.87354e-06	0.401852
1545	0.000137136	6.60943e-06	4.40628e-06	0.457121
1546	0.000175627	8.46452e-06	5.64301e-06	0.585422
1547	7.621e-05	3.67302e-06	2.44868e-06	0.254033
1548	4.3759e-05	2.10901e-06	1.40601e-06	0.145863
1549	7.76018e-05	3.7401e-06	2.4934e-06	0.258673
1550	0.000162502	7.83195e-06	5.2213e-06	0.541673
1551	0.000198573	9.57046e-06	6.3803e-06	0.661911
1552	9.16985e-05	4.41951e-06	2.94634e-06	0.305662
1553	8.26791e-05	3.98481e-06	2.65654e-06	0.275597
1554	6.22759e-05	3.00145e-06	2.00097e-06	0.207586
1555	0.000110407	5.32117e-06	3.54745e-06	0.368022
1556	0.000218367	1.05244e-05	7.0163e-06	0.727891
1557	0.000115502	5.56675e-06	3.71116e-06	0.385007
1558	0.000144636	6.97087e-06	4.64725e-06	0.482119
1559	0.000144243	6.95195e-06	4.63463e-06	0.48081
1560	9.07862e-05	4.37554e-06	2.91702e-06	0.302621
1561	7.24504e-05	3.49182e-06	2.32788e-06	0.241501
1562	4.43316e-05	2.13661e-06	1.42441e-06	0.147772
1563	0.000264417	1.27438e-05	8.49589e-06	0.881388
1564	9.548e-05	4.60176e-06	3.06784e-06	0.318267
1565	0.000192528	9.27909e-06	6.18606e-06	0.64176
1566	7.65917e-05	3.69142e-06	2.46095e-06	0.255306
1567	5.04323e-05	2.43064e-06	1.62042e-06	0.168108
1568	0.000137775	6.64022e-06	4.42681e-06	0.45925
1569	6.90186e-05	3.32642e-06	2.21762e-06	0.230062
1570	0.000139008	6.69963e-06	4.46642e-06	0.463359
1571	4.75515e-05	2.29179e-06	1.52786e-06	0.158505
1572	5.28177e-05	2.5456e-06	1.69707e-06	0.176059
1573	0.000108081	5.20906e-06	3.47271e-06	0.360269
1574	0.000112625	5.4281e-06	3.61873e-06	0.375418
1575	7.15803e-05	3.44989e-06	2.29993e-06	0.238601
1576	0.000108933	5.25014e-06	3.50009e-06	0.36311
1577	0.00012212	5.8857e-06	3.9238e-06	0.407066
1578	0.000113129	5.45239e-06	3.63493e-06	0.377098
1579	6.13827e-05	2.95841e-06	1.97227e-06	0.204609
1580	5.39953e-05	2.60236e-06	1.73491e-06	0.179984
1581	3.58884e-05	1.72968e-06	1.15312e-06	0.119628
1582	6.2519e-05	3.01317e-06	2.00878e-06	0.208397
1583	5.83658e-05	2.813e-06	1.87534e-06	0.194553
1584	9.05142e-05	4.36243e-06	2.90829e-06	0.301714
1585	8.02787e-05	3.86912e-06	2.57941e-06	0.267596
1586	0.000110671	5.33391e-06	3.55594e-06	0.368903
1587	9.22417e-05	4.44569e-06	2.96379e-06	0.307472
1588	4.03344e-05	1.94396e-06	1.29597e-06	0.134448
1589	0.00015289	7.3687e-06	4.91247e-06	0.509633
1590	9.07386e-05	4.37324e-06	2.9155e-06	0.302462
1591	6.95312e-05	3.35113e-06	2.23409e-06	0.231771
1592	0.000101163	4.87564e-06	3.25043e-06	0.337209
1593	0.000174122	8.39198e-06	5.59465e-06	0.580405
1594	8.4705e-05	4.08245e-06	2.72163e-06	0.28235
1595	0.000155533	7.4961e-06	4.9974e-06	0.518444
1596	0.000121429	5.8524e-06	3.9016e-06	0.404763
1597	0.000101455	4.88974e-06	3.25983e-06	0.338184
1598	9.42199e-05	4.54103e-06	3.02735e-06	0.314066
1599	0.000203972	9.83064e-06	6.55376e-06	0.679906
1600	0.000142836	6.88413e-06	4.58942e-06	0.47612
1601	0.000150999	7.27757e-06	4.85171e-06	0.503331
1602	0.00010062	4.8495e-06	3.233e-06	0.335401
1603	0.000104401	5.03172e-06	3.35448e-06	0.348003
1604	5.75711e-05	2.7747e-06	1.8498e-06	0.191904
1605	7.2824e-05	3.50983e-06	2.33989e-06	0.242747
1606	0.000150343	7.24595e-06	4.83063e-06	0.501144
1607	9.24027e-05	4.45345e-06	2.96897e-06	0.308009
1608	0.000115212	5.55275e-06	3.70183e-06	0.384039
1609	0.000105195	5.07e-06	3.38e-06	0.350651
1610	0.00010593	5.10541e-06	3.4036e-06	0.3531
1611	5.00431e-05	2.41188e-06	1.60792e-06	0.16681
1612	0.000135416	6.52652e-06	4.35101e-06	0.451387
1613	7.54745e-05	3.63757e-06	2.42505e-06	0.251582
1614	0.000138975	6.69806e-06	4.46538e-06	0.463251
1615	7.92265e-05	3.81841e-06	2.54561e-06	0.264088
1616	0.000112321	5.41342e-06	3.60895e-06	0.374403
1617	5.86902e-05	2.82864e-06	1.88576e-06	0.195634
1618	0.000114567	5.5217e-06	3.68113e-06	0.381891
1619	0.000128289	6.18304e-06	4.12202e-06	0.427631
1620	0.000107659	5.18875e-06	3.45917e-06	0.358864
1621	0.000130116	6.27106e-06	4.18071e-06	0.433719
1622	0.00016981	8.1842e-06	5.45613e-06	0.566035
1623	0.000123469	5.95071e-06	3.96714e-06	0.411563
1624	5.71807e-05	2.75589e-06	1.83726e-06	0.190602
1625	0.000162755	7.84414e-06	5.22943e-06	0.542516
1626	9.81929e-05	4.73251e-06	3.15501e-06	0.32731
1627	0.000129759	6.25388e-06	4.16925e-06	0.43253
1628	8.39395e-05	4.04555e-06	2.69704e-06	0.279798
1629	7.94714e-05	3.83021e-06	2.55347e-06	0.264905
1630	0.000154284	7.43588e-06	4.95725e-06	0.51428
1631	0.00019109	9.20978e-06	6.13986e-06	0.636966
1632	0.000119021	5.73633e-06	3.82422e-06	0.396736
1633	7.51329e-05	3.62111e-06	2.41407e-06	0.250443
1634	4.18938e-05	2.01911e-06	1.34608e-06	0.139646
1635	7.75618e-05	3.73818e-06	2.49212e-06	0.258539
1636	0.00010524	5.07216e-06	3.38144e-06	0.3508
1637	7.90189e-05	3.8084e-06	2.53893e-06	0.263396
1638	0.000102993	4.96385e-06	3.30924e-06	0.34331
1639	8.79396e-05	4.23834e-06	2.82556e-06	0.293132
1640	5.68676e-05	2.7408e-06	1.8272e-06	0.189559
1641	0.000177497	8.55465e-06	5.7031e-06	0.591656
1642	0.000120437	5.80457e-06	3.86971e-06	0.401455
1643	8.54888e-05	4.12022e-06	2.74682e-06	0.284963
1644	7.45965e-05	3.59526e-06	2.39684e-06	0.248655
1645	0.000118265	5.69991e-06	3.79994e-06	0.394216
1646	3.18559e-05	1.53533e-06	1.02355e-06	0.106186
1647	6.48509e-05	3.12556e-06	2.08371e-06	0.21617
1648	0.000235082	1.133e-05	7.55335e-06	0.783606
1649	0.000254831	1.22819e-05	8.18791e-06	0.849437
1650	9.85528e-05	4.74986e-06	3.16657e-06	0.328509
1651	3.73837e-05	1.80175e-06	1.20116e-06	0.124612
1652	0.000130519	6.29051e-06	4.19367e-06	0.435064
1653	0.000160202	7.72112e-06	5.14741e-06	0.534007
1654	6.72131e-05	3.23941e-06	2.1596e-06	0.224044
1655	6.16116e-05	2.96944e-06	1.97962e-06	0.205372
1656	5.9024e-05	2.84472e-06	1.89648e-06	0.196747
1657	0.000223787	1.07856e-05	7.19043e-06	0.745956
1658	7.47097e-05	3.60071e-06	2.40048e-06	0.249032
1659	8.97376e-05	4.325e-06	2.88333e-06	0.299125
1660	6.22048e-05	2.99803e-06	1.99868e-06	0.207349
1661	0.000158959	7.66119e-06	5.10746e-06	0.529863
1662	0.000156317	7.53384e-06	5.02256e-06	0.521055
1663	4.74856e-05	2.28862e-06	1.52575e-06	0.158285
1664	0.000120019	5.78445e-06	3.8563e-06	0.400063
1665	6.48367e-05	3.12487e-06	2.08325e-06	0.216122
1666	0.000116433	5.6116e-06	3.74107e-06	0.388109
1667	8.44673e-05	4.07099e-06	2.71399e-06	0.281558
1668	5.86301e-05	2.82574e-06	1.88383e-06	0.195434
1669	0.000126423	6.09311e-06	4.06208e-06	0.421411
1670	5.98524e-05	2.88465e-06	1.9231e-06	0.199508
1671	0.00018519	8.92542e-06	5.95028e-06	0.617299
1672	7.17707e-05	3.45907e-06	2.30604e-06	0.239236
1673	5.56631e-05	2.68274e-06	1.78849e-06	0.185544
1674	9.5379e-05	4.5969e-06	3.0646e-06	0.31793
1675	9.27421e-05	4.4698e-06	2.97987e-06	0.30914
1676	0.00013915	6.70649e-06	4.471e-06	0.463834
1677	0.000101424	4.88824e-06	3.25883e-06	0.33808
1678	6.00147e-05	2.89248e-06	1.92832e-06	0.200049
1679	8.80659e-05	4.24443e-06	2.82962e-06	0.293553
1680	0.000110955	5.34759e-06	3.56506e-06	0.36985
1681	5.712e-05	2.75296e-06	1.83531e-06	0.1904
1682	3.69685e-05	1.78174e-06	1.18782e-06	0.123228
1683	3.07691e-05	1.48295e-06	9.88634e-07	0.102564
1684	0.000207295	9.9908e-06	6.66054e-06	0.690983
1685	5.79093e-05	2.791e-06	1.86067e-06	0.193031
1686	8.64201e-05	4.16511e-06	2.77674e-06	0.288067
1687	0.000115715	5.577e-06	3.718e-06	0.385716
1688	6.31571e-05	3.04393e-06	2.02928e-06	0.210524
1689	5.43547e-05	2.61968e-06	1.74646e-06	0.181182
1690	6.37248e-05	3.07129e-06	2.04752e-06	0.212416
1691	0.000190697	9.19087e-06	6.12725e-06	0.635658
1692	9.99883e-05	4.81904e-06	3.2127e-06	0.333294
1693	8.13038e-05	3.91852e-06	2.61235e-06	0.271013
1694	7.8101e-05	3.76416e-06	2.50944e-06	0.260337
1695	5.97214e-05	2.87834e-06	1.91889e-06	0.199071
1696	6.56804e-05	3.16554e-06	2.11036e-06	0.218935
1697	0.000191922	9.24987e-06	6.16658e-06	0.639739
1698	8.97707e-05	4.3266e-06	2.8844e-06	0.299236
1699	4.54987e-05	2.19286e-06	1.46191e-06	0.151662
1700	0.000122669	5.91215e-06	3.94144e-06	0.408896
1701	8.99693e-05	4.33617e-06	2.89078e-06	0.299898
1702	6.30575e-05	3.03912e-06	2.02608e-06	0.210192
1703	0.000145664	7.02043e-06	4.68028e-06	0.485546
1704	3.27939e-05	1.58054e-06	1.05369e-06	0.109313
1705	0.000106043	5.11084e-06	3.40722e-06	0.353475
1706	0.000121964	5.8782e-06	3.9188e-06	0.406547
1707	7.57605e-05	3.65136e-06	2.43424e-06	0.252535
1708	7.44597e-05	3.58867e-06	2.39245e-06	0.248199
1709	7.0816e-05	3.41305e-06	2.27537e-06	0.236053
1710	8.13452e-05	3.92052e-06	2.61368e-06	0.271151
1711	5.73042e-05	2.76184e-06	1.84123e-06	0.191014
1712	0.00015233	7.34172e-06	4.89448e-06	0.507767
1713	4.70826e-05	2.2692e-06	1.5128e-06	0.156942
1714	7.63714e-05	3.6808e-06	2.45387e-06	0.254571
1715	5.54777e-05	2.67381e-06	1.78254e-06	0.184926
1716	0.000126863	6.11431e-06	4.07621e-06	0.422877
1717	9.23376e-05	4.45031e-06	2.96687e-06	0.307792
1718	0.00010287	4.95795e-06	3.3053e-06	0.342901
1719	0.00011638	5.60905e-06	3.73937e-06	0.387933
1720	8.13185e-05	3.91923e-06	2.61282e-06	0.271062
1721	6.45113e-05	3.10919e-06	2.0728e-06	0.215038
1722	0.000148908	7.17678e-06	4.78452e-06	0.49636
1723	0.000102698	4.94965e-06	3.29977e-06	0.342327
1724	0.000136255	6.56697e-06	4.37798e-06	0.454184
1725	8.7365e-05	4.21065e-06	2.8071e-06	0.291217
1726	0.000125047	6.02679e-06	4.01786e-06	0.416824
1727	7.36636e-05	3.5503e-06	2.36686e-06	0.245545
1728	6.38439e-05	3.07703e-06	2.05135e-06	0.212813
1729	0.000126916	6.11687e-06	4.07791e-06	0.423055
1730	8.27419e-05	3.98783e-06	2.65856e-06	0.275806
1731	0.000105222	5.07128e-06	3.38085e-06	0.350739
1732	5.33018e-05	2.56894e-06	1.71262e-06	0.177673
1733	6.89802e-05	3.32458e-06	2.21638e-06	0.229934
1734	0.000138871	6.69303e-06	4.46202e-06	0.462903
1735	7.22761e-05	3.48343e-06	2.32228e-06	0.24092
1736	0.000202355	9.75272e-06	6.50182e-06	0.674517
1737	7.56841e-05	3.64768e-06	2.43178e-06	0.25228
1738	0.000126468	6.09527e-06	4.06352e-06	0.421561
1739	8.19672e-05	3.9505e-06	2.63367e-06	0.273224
1740	8.41076e-05	4.05366e-06	2.70244e-06	0.280359
1741	0.000148282	7.14659e-06	4.7644e-06	0.494272
1742	5.05329e-05	2.43549e-06	1.62366e-06	0.168443
1743	4.95398e-05	2.38762e-06	1.59175e-06	0.165133
1744	0.000124827	6.01616e-06	4.01077e-06	0.416089
1745	0.000122628	5.91021e-06	3.94014e-06	0.408761
1746	9.56282e-05	4.6089e-06	3.0726e-06	0.318761
1747	0.000127096	6.12551e-06	4.08367e-06	0.423652
1748	0.000142341	6.86028e-06	4.57352e-06	0.47447
1749	5.79157e-05	2.79131e-06	1.86087e-06	0.193052
1750	0.000120152	5.79083e-06	3.86056e-06	0.400505
1751	5.69211e-05	2.74337e-06	1.82892e-06	0.189737
1752	9.6212e-05	4.63704e-06	3.09136e-06	0.320707
1753	0.000169456	8.1671e-06	5.44473e-06	0.564852
1754	0.000251391	1.21161e-05	8.07738e-06	0.837971
1755	0.000129066	6.22049e-06	4.14699e-06	0.430221
1756	7.77123e-05	3.74543e-06	2.49695e-06	0.259041
1757	0.000106491	5.13245e-06	3.42164e-06	0.35497
1758	0.000205087	9.8844e-06	6.5896e-06	0.683624
1759	6.99046e-05	3.36913e-06	2.24609e-06	0.233015
1760	0.000223295	1.07619e-05	7.17463e-06	0.744317
1761	6.52009e-05	3.14243e-06	2.09495e-06	0.217336
1762	0.000180158	8.68289e-06	5.78859e-06	0.600525
1763	0.000130236	6.27688e-06	4.18458e-06	0.434121
1764	0.000167678	8.08142e-06	5.38762e-06	0.558927
1765	9.53497e-05	4.59548e-06	3.06365e-06	0.317832
1766	8.6743e-05	4.18067e-06	2.78712e-06	0.289143
1767	7.45147e-05	3.59132e-06	2.39421e-06	0.248382
1768	8.17876e-05	3.94184e-06	2.62789e-06	0.272625
1769	6.33305e-05	3.05228e-06	2.03486e-06	0.211102
1770	8.39519e-05	4.04615e-06	2.69744e-06	0.27984
1771	0.000104339	5.02871e-06	3.35247e-06	0.347795
1772	0.000131031	6.31519e-06	4.21013e-06	0.436771
1773	0.000101046	4.87002e-06	3.24668e-06	0.33682
1774	6.15042e-05	2.96426e-06	1.97618e-06	0.205014
1775	7.92674e-05	3.82038e-06	2.54692e-06	0.264225
1776	9.35153e-05	4.50707e-06	3.00471e-06	0.311718
1777	0.000156899	7.56191e-06	5.04127e-06	0.522996
1778	0.000109713	5.28774e-06	3.52516e-06	0.36571
1779	0.000110822	5.34119e-06	3.5608e-06	0.369407
1780	5.53518e-05	2.66774e-06	1.77849e-06	0.184506
1781	6.00207e-05	2.89276e-06	1.92851e-06	0.200069
1782	9.75285e-05	4.70049e-06	3.13366e-06	0.325095
1783	8.25058e-05	3.97646e-06	2.65097e-06	0.275019
1784	0.000107415	5.17699e-06	3.45133e-06	0.35805
1785	8.492e-05	4.09281e-06	2.72854e-06	0.283067
1786	0.000136647	6.58586e-06	4.39057e-06	0.455491
1787	0.000201483	9.71068e-06	6.47378e-06	0.671609
1788	6.07402e-05	2.92744e-06	1.95163e-06	0.202467
1789	5.34484e-05	2.576e-06	1.71734e-06	0.178161
1790	5.95657e-05	2.87083e-06	1.91389e-06	0.198552
1791	8.75782e-05	4.22092e-06	2.81395e-06	0.291927
1792	6.38573e-05	3.07767e-06	2.05178e-06	0.212858
1793	0.000108832	5.2453e-06	3.49686e-06	0.362775
1794	7.94615e-05	3.82973e-06	2.55315e-06	0.264872
1795	4.01987e-05	1.93742e-06	1.29161e-06	0.133996
1796	9.08132e-05	4.37684e-06	2.91789e-06	0.302711
1797	0.00016866	8.12875e-06	5.41917e-06	0.5622
1798	6.30176e-05	3.0372e-06	2.0248e-06	0.210059
1799	0.000114937	5.53949e-06	3.69299e-06	0.383122
1800	5.83807e-05	2.81372e-06	1.87582e-06	0.194602
1801	0.000126043	6.07478e-06	4.04986e-06	0.420144
1802	0.000119829	5.77527e-06	3.85018e-06	0.399429
1803	6.43622e-05	3.10201e-06	2.068e-06	0.214541
1804	4.97942e-05	2.39989e-06	1.59992e-06	0.165981
1805	9.05507e-05	4.36419e-06	2.90946e-06	0.301836
1806	4.70385e-05	2.26707e-06	1.51138e-06	0.156795
1807	0.000134846	6.49906e-06	4.33271e-06	0.449488
1808	7.89554e-05	3.80534e-06	2.53689e-06	0.263185
1809	5.35962e-05	2.58313e-06	1.72208e-06	0.178654
1810	8.36331e-05	4.03079e-06	2.68719e-06	0.278777
1811	8.92686e-05	4.3024e-06	2.86826e-06	0.297562
1812	5.43414e-05	2.61904e-06	1.74603e-06	0.181138
1813	9.81665e-05	4.73124e-06	3.15416e-06	0.327222
1814	5.16533e-05	2.48949e-06	1.65966e-06	0.172178
1815	0.000141216	6.80605e-06	4.53736e-06	0.470719
1816	6.96182e-05	3.35533e-06	2.23688e-06	0.232061
1817	5.30415e-05	2.55639e-06	1.70426e-06	0.176805
1818	7.79206e-05	3.75547e-06	2.50365e-06	0.259735
1819	7.57636e-05	3.65151e-06	2.43434e-06	0.252545
1820	9.41593e-05	4.53811e-06	3.02541e-06	0.313864
1821	0.000298548	1.43888e-05	9.59255e-06	0.995159
1822	6.57551e-05	3.16914e-06	2.11276e-06	0.219184
1823	0.000130653	6.29694e-06	4.19796e-06	0.435508
1824	6.61044e-05	3.18597e-06	2.12398e-06	0.220348
1825	0.000169133	8.15157e-06	5.43438e-06	0.563778
1826	0.000158596	7.64372e-06	5.09581e-06	0.528654
1827	0.000130959	6.31171e-06	4.20781e-06	0.43653
1828	5.15845e-05	2.48617e-06	1.65745e-06	0.171948
1829	0.000127905	6.16451e-06	4.10967e-06	0.426349
1830	0.000106717	5.14335e-06	3.4289e-06	0.355724
1831	6.93162e-05	3.34077e-06	2.22718e-06	0.231054
1832	7.27566e-05	3.50658e-06	2.33772e-06	0.242522
1833	4.48701e-05	2.16257e-06	1.44171e-06	0.149567
1834	6.22071e-05	2.99814e-06	1.99876e-06	0.207357
1835	0.000112151	5.40524e-06	3.60349e-06	0.373837
1836	8.44443e-05	4.06989e-06	2.71326e-06	0.281481
1837	0.000125904	6.06807e-06	4.04538e-06	0.419679
1838	0.000156831	7.55866e-06	5.0391e-06	0.522771
1839	0.000136437	6.57571e-06	4.3838e-06	0.454788
1840	5.42876e-05	2.61645e-06	1.7443e-06	0.180959
1841	9.57553e-05	4.61503e-06	3.07669e-06	0.319184
1842	0.000114689	5.52756e-06	3.68504e-06	0.382296
1843	7.13399e-05	3.4383e-06	2.2922e-06	0.2378
1844	9.40909e-05	4.53481e-06	3.02321e-06	0.313636
1845	0.000233062	1.12327e-05	7.48844e-06	0.776872
1846	0.000120066	5.78669e-06	3.85779e-06	0.400218
1847	6.57979e-05	3.1712e-06	2.11413e-06	0.219326
1848	0.000102167	4.92403e-06	3.28268e-06	0.340555
1849	6.96582e-05	3.35725e-06	2.23817e-06	0.232194
1850	0.000125291	6.03854e-06	4.02569e-06	0.417637
1851	8.27273e-05	3.98713e-06	2.65809e-06	0.275758
1852	0.000112457	5.42001e-06	3.61334e-06	0.374858
1853	0.000102704	4.94991e-06	3.29994e-06	0.342346
1854	0.000127452	6.1427e-06	4.09514e-06	0.424841
1855	4.2241e-05	2.03585e-06	1.35723e-06	0.140803
1856	0.000203183	9.79261e-06	6.52841e-06	0.677276
1857	5.69321e-05	2.7439e-06	1.82927e-06	0.189774
1858	0.00011047	5.32421e-06	3.54947e-06	0.368232
1859	8.59621e-05	4.14304e-06	2.76203e-06	0.28654
1860	5.59027e-05	2.69429e-06	1.79619e-06	0.186342
1861	5.56303e-05	2.68116e-06	1.78744e-06	0.185434
1862	4.65888e-05	2.2454e-06	1.49693e-06	0.155296
1863	0.000104243	5.02409e-06	3.3494e-06	0.347476
1864	0.000115756	5.57898e-06	3.71932e-06	0.385853
1865	0.000103782	5.0019e-06	3.3346e-06	0.345941
1866	3.32904e-05	1.60447e-06	1.06965e-06	0.110968
1867	0.000106728	5.14386e-06	3.42924e-06	0.355759
1868	0.000142212	6.85404e-06	4.56936e-06	0.474039
1869	0.000180336	8.69151e-06	5.79434e-06	0.601121
1870	7.65625e-05	3.69001e-06	2.46001e-06	0.255208
1871	0.000105929	5.10536e-06	3.40358e-06	0.353097
1872	0.00013349	6.43369e-06	4.28912e-06	0.444966
1873	9.99009e-05	4.81483e-06	3.20989e-06	0.333003
1874	9.85104e-05	4.74781e-06	3.16521e-06	0.328368
1875	4.72064e-05	2.27516e-06	1.51678e-06	0.157355
1876	5.9521e-05	2.86868e-06	1.91245e-06	0.198403
1877	0.00017388	8.38035e-06	5.5869e-06	0.579601
1878	0.000106741	5.14451e-06	3.42968e-06	0.355804
1879	6.88927e-05	3.32036e-06	2.21357e-06	0.229642
1880	7.6701e-05	3.69669e-06	2.46446e-06	0.25567
1881	9.47716e-05	4.56762e-06	3.04508e-06	0.315905
1882	0.000255603	1.2319e-05	8.2127e-06	0.852009
1883	6.23648e-05	3.00574e-06	2.00382e-06	0.207883
1884	6.89261e-05	3.32197e-06	2.21464e-06	0.229754
1885	4.71819e-05	2.27398e-06	1.51599e-06	0.157273
1886	8.74016e-05	4.21242e-06	2.80828e-06	0.291339
1887	0.000101253	4.87998e-06	3.25332e-06	0.337509
1888	0.000218589	1.05351e-05	7.02341e-06	0.728629
1889	0.000143428	6.91267e-06	4.60845e-06	0.478094
1890	9.19654e-05	4.43237e-06	2.95491e-06	0.306551
1891	4.73486e-05	2.28202e-06	1.52135e-06	0.157829
1892	4.09756e-05	1.97486e-06	1.31657e-06	0.136585
1893	0.000139219	6.70979e-06	4.4732e-06	0.464062
1894	9.6541e-05	4.6529e-06	3.10193e-06	0.321803
1895	0.000118671	5.71949e-06	3.81299e-06	0.395571
1896	0.000195703	9.43214e-06	6.28809e-06	0.652345
1897	0.000186144	8.97143e-06	5.98096e-06	0.620482
1898	9.48061e-05	4.56928e-06	3.04619e-06	0.31602
1899	0.000111212	5.35999e-06	3.57333e-06	0.370707
1900	0.000138809	6.69007e-06	4.46005e-06	0.462698
1901	5.7732e-05	2.78245e-06	1.85497e-06	0.19244
1902	0.000152364	7.34334e-06	4.89556e-06	0.50788
1903	0.000286988	1.38317e-05	9.22114e-06	0.956627
1904	0.000142053	6.84639e-06	4.56426e-06	0.473509
1905	5.82235e-05	2.80615e-06	1.87076e-06	0.194078
1906	0.000175175	8.44276e-06	5.6285e-06	0.583917
1907	7.98854e-05	3.85017e-06	2.56678e-06	0.266285
1908	7.5211e-05	3.62488e-06	2.41658e-06	0.250703
1909	0.000111066	5.35293e-06	3.56862e-06	0.370219
1910	0.000113074	5.44972e-06	3.63314e-06	0.376913
1911	8.98359e-05	4.32974e-06	2.88649e-06	0.299453
1912	0.000125799	6.06302e-06	4.04202e-06	0.41933
1913	0.000104942	5.05778e-06	3.37185e-06	0.349806
1914	6.51007e-05	3.1376e-06	2.09173e-06	0.217002
1915	0.000170362	8.21076e-06	5.47384e-06	0.567872
1916	0.000193401	9.32116e-06	6.21411e-06	0.644669
1917	0.000113825	5.48591e-06	3.65727e-06	0.379416
1918	0.000136746	6.5906e-06	4.39373e-06	0.455818
1919	0.000189612	9.13857e-06	6.09238e-06	0.632041
1920	7.46286e-05	3.59681e-06	2.39787e-06	0.248762
1921	0.000100365	4.83719e-06	3.22479e-06	0.334549
1922	0.000105333	5.07664e-06	3.38443e-06	0.35111
1923	0.000183298	8.83426e-06	5.88951e-06	0.610995
1924	5.63247e-05	2.71463e-06	1.80975e-06	0.187749
1925	0.000100026	4.82087e-06	3.21392e-06	0.333421
1926	4.73924e-05	2.28413e-06	1.52275e-06	0.157975
1927	0.000137409	6.62256e-06	4.41504e-06	0.458029
1928	0.000222871	1.07415e-05	7.161e-06	0.742902
1929	3.3434e-05	1.61139e-06	1.07426e-06	0.111447
1930	9.62934e-05	4.64097e-06	3.09398e-06	0.320978
1931	6.97066e-05	3.35959e-06	2.23972e-06	0.232355
1932	0.000102616	4.94568e-06	3.29712e-06	0.342053
1933	0.000146518	7.0616e-06	4.70773e-06	0.488394
1934	0.000113301	5.46067e-06	3.64044e-06	0.37767
1935	0.000106188	5.11784e-06	3.4119e-06	0.35396
1936	0.000159687	7.6963e-06	5.13087e-06	0.532291
1937	0.000113217	5.45663e-06	3.63775e-06	0.377391
1938	8.04619e-05	3.87795e-06	2.5853e-06	0.268206
1939	6.36175e-05	3.06611e-06	2.04408e-06	0.212058
1940	7.68496e-05	3.70385e-06	2.46923e-06	0.256165
1941	0.000122124	5.88591e-06	3.92394e-06	0.407081
1942	9.04702e-05	4.36031e-06	2.90687e-06	0.301567
1943	0.000106457	5.13082e-06	3.42054e-06	0.354857
1944	8.71798e-05	4.20172e-06	2.80115e-06	0.290599
1945	3.06866e-05	1.47897e-06	9.85981e-07	0.102289
1946	0.00012114	5.83849e-06	3.89232e-06	0.403801
1947	3.91136e-05	1.88512e-06	1.25675e-06	0.130379
1948	6.41015e-05	3.08944e-06	2.05963e-06	0.213672
1949	0.000127968	6.16757e-06	4.11171e-06	0.426561
1950	0.000103492	4.98791e-06	3.32527e-06	0.344974
1951	4.73149e-05	2.28039e-06	1.52026e-06	0.157716
1952	0.000149592	7.20975e-06	4.8065e-06	0.49864
1953	9.996e-05	4.81768e-06	3.21179e-06	0.3332
1954	9.99296e-05	4.81622e-06	3.21081e-06	0.333099
1955	6.77335e-05	3.26449e-06	2.17632e-06	0.225778
1956	3.51813e-05	1.6956e-06	1.1304e-06	0.117271
1957	5.36741e-05	2.58688e-06	1.72459e-06	0.178914
1958	0.00012451	6.00089e-06	4.00059e-06	0.415033
1959	0.000100633	4.85011e-06	3.23341e-06	0.335443
1960	0.000132981	6.40915e-06	4.27277e-06	0.443269
1961	0.000127933	6.16587e-06	4.11058e-06	0.426443
1962	0.000118836	5.72742e-06	3.81828e-06	0.39612
1963	0.000127583	6.14898e-06	4.09932e-06	0.425275
1964	0.000114481	5.51754e-06	3.67836e-06	0.381604
1965	5.24974e-05	2.53017e-06	1.68678e-06	0.174991
1966	5.93564e-05	2.86074e-06	1.90716e-06	0.197855
1967	0.000124727	6.01136e-06	4.00757e-06	0.415757
1968	0.000103684	4.99717e-06	3.33144e-06	0.345614
1969	0.000164235	7.91549e-06	5.277e-06	0.547451
1970	0.000102827	4.95586e-06	3.30391e-06	0.342757
1971	9.93416e-05	4.78787e-06	3.19192e-06	0.331139
1972	6.4334e-05	3.10064e-06	2.0671e-06	0.214447
1973	0.00010508	5.06446e-06	3.37631e-06	0.350268
1974	8.98911e-05	4.3324e-06	2.88827e-06	0.299637
1975	8.66928e-05	4.17826e-06	2.7855e-06	0.288976
1976	0.000113048	5.44845e-06	3.6323e-06	0.376825
1977	7.51716e-05	3.62297e-06	2.41532e-06	0.250572
1978	8.09468e-05	3.90132e-06	2.60088e-06	0.269823
1979	4.46284e-05	2.15091e-06	1.43394e-06	0.148761
1980	0.000106865	5.15049e-06	3.43366e-06	0.356218
1981	9.88524e-05	4.7643e-06	3.1762e-06	0.329508
1982	0.000119856	5.7766e-06	3.85106e-06	0.39952
1983	0.000120379	5.80178e-06	3.86785e-06	0.401262
1984	7.53239e-05	3.63031e-06	2.42021e-06	0.25108
1985	9.36278e-05	4.51249e-06	3.00833e-06	0.312093
1986	8.7919e-05	4.23735e-06	2.8249e-06	0.293063
1987	0.000133079	6.4139e-06	4.27593e-06	0.443598
1988	5.24834e-05	2.52949e-06	1.68633e-06	0.174945
1989	5.46023e-05	2.63162e-06	1.75441e-06	0.182008
1990	0.000132995	6.40982e-06	4.27321e-06	0.443315
1991	8.48183e-05	4.08791e-06	2.72527e-06	0.282728
1992	6.46354e-05	3.11517e-06	2.07678e-06	0.215451
1993	8.3361e-05	4.01767e-06	2.67845e-06	0.27787
1994	0.000164268	7.91709e-06	5.27806e-06	0.547561
1995	6.27154e-05	3.02264e-06	2.01509e-06	0.209051
1996	0.000132859	6.40327e-06	4.26885e-06	0.442862
1997	3.71118e-05	1.78864e-06	1.19243e-06	0.123706
1998	0.000111094	5.35428e-06	3.56952e-06	0.370312
1999	6.58453e-05	3.17349e-06	2.11566e-06	0.219484
[truncated: 8,001 more rows]
