# Supplementary material for: Health risk assessment from habitants of Araró, Michoacán, México, exposed to arsenic by dust, using Monte Carlo probabilistic method
Source: PeerJ. 2025 Jun 10;13:e18805. doi: 10.7717/peerj.18805 (PMC12164815; doi:10.7717/peerj.18805)
Supplement: Supplemental Information 5 [file peerj-13-18805-s005.xlsx]

## Sheet: Risk Premises
Study Title:	Inhalación premisas simulación.					Last simulation run:
Study File:	Inhalación premisas simulación.xlsx					2022-11-07 12:08:39
	Output Cells	Histogram settings				Multi-cell output range names
Description for Reports	Range Names	Min value	Max value	Step size		title row or column (optional)
	ADD	Auto	Auto	Auto
	ADD_carc	Auto	Auto	Auto
	CR	Auto	Auto	Auto
	HQ	Auto	Auto	Auto
		Study	Min				Max
	Input Cells	File	Allowed		Expected		Allowed
Description for Reports	Range Names	Values	Values	10/90	Values	90/10	Values	Distributions	Parameters and chart settings
	BW	60.91	25.9	41.0554	61.63	82.3058	158.4	Normal	Mean	60.91	std dev	16.5625	X Axis Min	auto	X Axis Max	auto
	Conc	15.6	5.94	10.1171	15.7996	21.5085	42.53	Normal	Mean	15.6	std dev	4.57375	X Axis Min	auto	X Axis Max	auto
	ED	15.89	13	14.9289	15.8901	16.8515	19	Normal	Mean	15.89	std dev	0.75	X Axis Min	auto	X Axis Max	auto

## Sheet: Simulation Summary
	10000	Simulations run
					Change in expected values as simulations increase									Change in standard deviation as simulations increase
	Minimum result	Maximum result	Expected value	Std deviation	125	250	500	1000	2000	4000	8000	10000		125	250	500	1000	2000	4000	8000	10000
ADD	7.38885e-10	1.14183e-08	3.19853e-09	1.32829e-09	-	-0.0177672	-0.00840062	0.0106391	-0.00808833	0.00900278	0.00107588	0.00160077		-	0.0183329	-0.023811	0.0191982	-0.0362896	-0.000606485	0.0119899	-0.0075555
ADD_carc	1.60733e-10	2.48388e-09	6.9579e-10	2.88949e-10	-	-0.0177672	-0.00840062	0.0106391	-0.00808833	0.00900278	0.00107588	0.00160077		-	0.0183329	-0.023811	0.0191982	-0.0362896	-0.000606485	0.0119899	-0.0075555
CR	1.33944e-11	2.0699e-10	5.79825e-11	2.40791e-11	-	-0.0177672	-0.00840062	0.0106391	-0.00808833	0.00900278	0.00107588	0.00160077		-	0.0183329	-0.023811	0.0191982	-0.0362896	-0.000606485	0.0119899	-0.0075555
HQ	4.9259e-05	0.000761222	0.000213235	8.85528e-05	-	-0.0177672	-0.00840062	0.0106391	-0.00808833	0.00900278	0.00107588	0.00160077		-	0.0183329	-0.023811	0.0191982	-0.0362896	-0.000606485	0.0119899	-0.0075555

## Sheet: Simulation variance
This worksheet shows the convergence of the output variables as a function of the number of simulations
You should run enough simulations until the % change is very small, typically < 1.0%
ADD
	# of Sims	125	250	500	1000	2000	4000	8000	10000
	Avg Value	3.238e-09	3.18047e-09	3.15375e-09	3.1873e-09	3.16152e-09	3.18999e-09	3.19342e-09	3.19853e-09
	% Chg		-0.0177672	-0.00840062	0.0106391	-0.00808833	0.00900278	0.00107588	0.00160077
	Std Dev.	1.35533e-09	1.38018e-09	1.34732e-09	1.37318e-09	1.32335e-09	1.32255e-09	1.3384e-09	1.32829e-09
	% Chg		0.0183329	-0.023811	0.0191982	-0.0362896	-0.000606485	0.0119899	-0.0075555
ADD_carc
	# of Sims	125	250	500	1000	2000	4000	8000	10000
	Avg Value	7.04376e-10	6.91861e-10	6.86049e-10	6.93348e-10	6.8774e-10	6.93931e-10	6.94678e-10	6.9579e-10
	% Chg		-0.0177672	-0.00840062	0.0106391	-0.00808833	0.00900278	0.00107588	0.00160077
	Std Dev.	2.94831e-10	3.00236e-10	2.93087e-10	2.98714e-10	2.87874e-10	2.87699e-10	2.91149e-10	2.88949e-10
	% Chg		0.0183329	-0.023811	0.0191982	-0.0362896	-0.000606485	0.0119899	-0.0075555
CR
	# of Sims	125	250	500	1000	2000	4000	8000	10000
	Avg Value	5.8698e-11	5.76551e-11	5.71707e-11	5.7779e-11	5.73116e-11	5.78276e-11	5.78898e-11	5.79825e-11
	% Chg		-0.0177672	-0.00840062	0.0106391	-0.00808833	0.00900278	0.00107588	0.00160077
	Std Dev.	2.45692e-11	2.50197e-11	2.44239e-11	2.48928e-11	2.39895e-11	2.39749e-11	2.42624e-11	2.40791e-11
	% Chg		0.0183329	-0.023811	0.0191982	-0.0362896	-0.000606485	0.0119899	-0.0075555
HQ
	# of Sims	125	250	500	1000	2000	4000	8000	10000
	Avg Value	0.000215867	0.000212031	0.00021025	0.000212487	0.000210768	0.000212666	0.000212895	0.000213235
	% Chg		-0.0177672	-0.00840062	0.0106391	-0.00808833	0.00900278	0.00107588	0.00160077
	Std Dev.	9.03554e-05	9.20119e-05	8.9821e-05	9.15454e-05	8.82233e-05	8.81698e-05	8.92269e-05	8.85528e-05
	% Chg		0.0183329	-0.023811	0.0191982	-0.0362896	-0.000606485	0.0119899	-0.0075555

## Sheet: ADD Results
ADD Results
Minimum result	7.38885e-10				2.96791e-09	Study value
Maximum result	1.14183e-08				0.4995	of results are equal or lower
Expected value	3.19853e-09				0.5005	of results are equal or greater
Std Deviation	1.32829e-09
Out of 10000 simulations		Of those with numeric values:
10000 had numeric values.			5% <=	1.47641e-09
0 had error values.			10% <=	1.74598e-09
			15% <=	1.95169e-09
			20% <=	2.12263e-09
			25% <=	2.27089e-09
			30% <=	2.41655e-09
			35% <=	2.55518e-09
			40% <=	2.69385e-09
			45% <=	2.82941e-09
			50% <=	2.96882e-09
			55% <=	3.11581e-09
			60% <=	3.2796e-09
			65% <=	3.45225e-09
			70% <=	3.63627e-09
			75% <=	3.8659e-09
			80% <=	4.11566e-09
			85% <=	4.42776e-09
			90% <=	4.91071e-09
			95% <=	5.7453e-09
			100% <=	1.14183e-08
If ADD is:				2.96791e-09	0.4995	of results are equal or lower
(Chg to do what ifs)					0.5005	of results are greater
					Cumulative				Cumulative
ADD	frequency:				frequency:				frequency:
<=7.38885E-10	1	0.0001		<=7.38885E-10	1	0.0001		=>7.38885E-10	10000	1
7.38885E-10 to 1.30096E-09	272	0.0272		<=1.30096E-09	273	0.0273		=>1.30096E-09	9727	0.9727
1.30096E-09 to 1.86304E-09	982	0.0982		<=1.86304E-09	1255	0.1255		=>1.86304E-09	8745	0.8745
1.86304E-09 to 2.42511E-09	1783	0.1783		<=2.42511E-09	3038	0.3038		=>2.42511E-09	6962	0.6962
2.42511E-09 to 2.98719E-09	2028	0.2028		<=2.98719E-09	5066	0.5066		=>2.98719E-09	4934	0.4934
2.98719E-09 to 3.54927E-09	1709	0.1709		<=3.54927E-09	6775	0.6775		=>3.54927E-09	3225	0.3225
3.54927E-09 to 4.11134E-09	1219	0.1219		<=4.11134E-09	7994	0.7994		=>4.11134E-09	2006	0.2006
4.11134E-09 to 4.67342E-09	775	0.0775		<=4.67342E-09	8769	0.8769		=>4.67342E-09	1231	0.1231
4.67342E-09 to 5.2355E-09	462	0.0462		<=5.2355E-09	9231	0.9231		=>5.2355E-09	769	0.0769
5.2355E-09 to 5.79757E-09	292	0.0292		<=5.79757E-09	9523	0.9523		=>5.79757E-09	477	0.0477
5.79757E-09 to 6.35965E-09	204	0.0204		<=6.35965E-09	9727	0.9727		=>6.35965E-09	273	0.0273
6.35965E-09 to 6.92172E-09	105	0.0105		<=6.92172E-09	9832	0.9832		=>6.92172E-09	168	0.0168
6.92172E-09 to 7.4838E-09	57	0.0057		<=7.4838E-09	9889	0.9889		=>7.4838E-09	111	0.0111
7.4838E-09 to 8.04588E-09	49	0.0049		<=8.04588E-09	9938	0.9938		=>8.04588E-09	62	0.0062
8.04588E-09 to 8.60795E-09	23	0.0023		<=8.60795E-09	9961	0.9961		=>8.60795E-09	39	0.0039
8.60795E-09 to 9.17003E-09	19	0.0019		<=9.17003E-09	9980	0.998		=>9.17003E-09	20	0.002
9.17003E-09 to 9.73211E-09	10	0.001		<=9.73211E-09	9990	0.999		=>9.73211E-09	10	0.001
9.73211E-09 to 1.02942E-08	7	0.0007		<=1.02942E-08	9997	0.9997		=>1.02942E-08	3	0.0003
1.02942E-08 to 1.08563E-08	2	0.0002		<=1.08563E-08	9999	0.9999		=>1.08563E-08	1	0.0001
1.08563E-08 to 1.14183E-08	1	0.0001		<=1.14183E-08	10000	1		=>1.14183E-08	1	0.0001
>1.14183E-08	0	0
Bin Size	5.62076e-10
Number of bins	21
# of Sims	Avg Value	% Chg		Std Dev.	% Chg
125	3.238e-09			1.35533e-09
250	3.18047e-09	-0.0177672		1.38018e-09	0.0183329
500	3.15375e-09	-0.00840062		1.34732e-09	-0.023811
1000	3.1873e-09	0.0106391		1.37318e-09	0.0191982
2000	3.16152e-09	-0.00808833		1.32335e-09	-0.0362896
4000	3.18999e-09	0.00900278		1.32255e-09	-0.000606485
8000	3.19342e-09	0.00107588		1.3384e-09	0.0119899
10000	3.19853e-09	0.00160077		1.32829e-09	-0.0075555

## Sheet: ADD_carc Results
ADD carc Results
Minimum result	1.60733e-10				6.45623e-10	Study value
Maximum result	2.48388e-09				0.4995	of results are equal or lower
Expected value	6.9579e-10				0.5005	of results are equal or greater
Std Deviation	2.88949e-10
Out of 10000 simulations		Of those with numeric values:
10000 had numeric values.			5% <=	3.2117e-10
0 had error values.			10% <=	3.7981e-10
			15% <=	4.24559e-10
			20% <=	4.61746e-10
			25% <=	4.93995e-10
			30% <=	5.25683e-10
			35% <=	5.5584e-10
			40% <=	5.86004e-10
			45% <=	6.15494e-10
			50% <=	6.45819e-10
			55% <=	6.77796e-10
			60% <=	7.13426e-10
			65% <=	7.50983e-10
			70% <=	7.91014e-10
			75% <=	8.40966e-10
			80% <=	8.95296e-10
			85% <=	9.63189e-10
			90% <=	1.06825e-09
			95% <=	1.2498e-09
			100% <=	2.48388e-09
If ADD carc is:				6.45623e-10	0.4995	of results are equal or lower
(Chg to do what ifs)					0.5005	of results are greater
					Cumulative				Cumulative
ADD carc	frequency:				frequency:				frequency:
<=1.60733E-10	1	0.0001		<=1.60733E-10	1	0.0001		=>1.60733E-10	10000	1
1.60733E-10 to 2.83004E-10	272	0.0272		<=2.83004E-10	273	0.0273		=>2.83004E-10	9727	0.9727
2.83004E-10 to 4.05274E-10	982	0.0982		<=4.05274E-10	1255	0.1255		=>4.05274E-10	8745	0.8745
4.05274E-10 to 5.27545E-10	1783	0.1783		<=5.27545E-10	3038	0.3038		=>5.27545E-10	6962	0.6962
5.27545E-10 to 6.49816E-10	2028	0.2028		<=6.49816E-10	5066	0.5066		=>6.49816E-10	4934	0.4934
6.49816E-10 to 7.72087E-10	1709	0.1709		<=7.72087E-10	6775	0.6775		=>7.72087E-10	3225	0.3225
7.72087E-10 to 8.94358E-10	1219	0.1219		<=8.94358E-10	7994	0.7994		=>8.94358E-10	2006	0.2006
8.94358E-10 to 1.01663E-09	775	0.0775		<=1.01663E-09	8769	0.8769		=>1.01663E-09	1231	0.1231
1.01663E-09 to 1.1389E-09	462	0.0462		<=1.1389E-09	9231	0.9231		=>1.1389E-09	769	0.0769
1.1389E-09 to 1.26117E-09	292	0.0292		<=1.26117E-09	9523	0.9523		=>1.26117E-09	477	0.0477
1.26117E-09 to 1.38344E-09	204	0.0204		<=1.38344E-09	9727	0.9727		=>1.38344E-09	273	0.0273
1.38344E-09 to 1.50571E-09	105	0.0105		<=1.50571E-09	9832	0.9832		=>1.50571E-09	168	0.0168
1.50571E-09 to 1.62798E-09	57	0.0057		<=1.62798E-09	9889	0.9889		=>1.62798E-09	111	0.0111
1.62798E-09 to 1.75025E-09	49	0.0049		<=1.75025E-09	9938	0.9938		=>1.75025E-09	62	0.0062
1.75025E-09 to 1.87252E-09	23	0.0023		<=1.87252E-09	9961	0.9961		=>1.87252E-09	39	0.0039
1.87252E-09 to 1.9948E-09	19	0.0019		<=1.9948E-09	9980	0.998		=>1.9948E-09	20	0.002
1.9948E-09 to 2.11707E-09	10	0.001		<=2.11707E-09	9990	0.999		=>2.11707E-09	10	0.001
2.11707E-09 to 2.23934E-09	7	0.0007		<=2.23934E-09	9997	0.9997		=>2.23934E-09	3	0.0003
2.23934E-09 to 2.36161E-09	2	0.0002		<=2.36161E-09	9999	0.9999		=>2.36161E-09	1	0.0001
2.36161E-09 to 2.48388E-09	1	0.0001		<=2.48388E-09	10000	1		=>2.48388E-09	1	0.0001
>2.48388E-09	0	0
Bin Size	1.22271e-10
Number of bins	21
# of Sims	Avg Value	% Chg		Std Dev.	% Chg
125	7.04376e-10			2.94831e-10
250	6.91861e-10	-0.0177672		3.00236e-10	0.0183329
500	6.86049e-10	-0.00840062		2.93087e-10	-0.023811
1000	6.93348e-10	0.0106391		2.98714e-10	0.0191982
2000	6.8774e-10	-0.00808833		2.87874e-10	-0.0362896
4000	6.93931e-10	0.00900278		2.87699e-10	-0.000606485
8000	6.94678e-10	0.00107588		2.91149e-10	0.0119899
10000	6.9579e-10	0.00160077		2.88949e-10	-0.0075555

## Sheet: CR Results
CR Results
Minimum result	1.33944e-11				5.38019e-11	Study value
Maximum result	2.0699e-10				0.4995	of results are equal or lower
Expected value	5.79825e-11				0.5005	of results are equal or greater
Std Deviation	2.40791e-11
Out of 10000 simulations		Of those with numeric values:
10000 had numeric values.			5% <=	2.67641e-11
0 had error values.			10% <=	3.16508e-11
			15% <=	3.53799e-11
			20% <=	3.84788e-11
			25% <=	4.11663e-11
			30% <=	4.38069e-11
			35% <=	4.632e-11
			40% <=	4.88336e-11
			45% <=	5.12911e-11
			50% <=	5.38183e-11
			55% <=	5.6483e-11
			60% <=	5.94522e-11
			65% <=	6.25819e-11
			70% <=	6.59178e-11
			75% <=	7.00805e-11
			80% <=	7.4608e-11
			85% <=	8.02657e-11
			90% <=	8.90206e-11
			95% <=	1.0415e-10
			100% <=	2.0699e-10
If CR is:				5.38019e-11	0.4995	of results are equal or lower
(Chg to do what ifs)					0.5005	of results are greater
					Cumulative				Cumulative
CR	frequency:				frequency:				frequency:
<=1.33944E-11	1	0.0001		<=1.33944E-11	1	0.0001		=>1.33944E-11	10000	1
1.33944E-11 to 2.35836E-11	272	0.0272		<=2.35836E-11	273	0.0273		=>2.35836E-11	9727	0.9727
2.35836E-11 to 3.37729E-11	982	0.0982		<=3.37729E-11	1255	0.1255		=>3.37729E-11	8745	0.8745
3.37729E-11 to 4.39621E-11	1783	0.1783		<=4.39621E-11	3038	0.3038		=>4.39621E-11	6962	0.6962
4.39621E-11 to 5.41513E-11	2028	0.2028		<=5.41513E-11	5066	0.5066		=>5.41513E-11	4934	0.4934
5.41513E-11 to 6.43406E-11	1709	0.1709		<=6.43406E-11	6775	0.6775		=>6.43406E-11	3225	0.3225
6.43406E-11 to 7.45298E-11	1219	0.1219		<=7.45298E-11	7994	0.7994		=>7.45298E-11	2006	0.2006
7.45298E-11 to 8.47191E-11	775	0.0775		<=8.47191E-11	8769	0.8769		=>8.47191E-11	1231	0.1231
8.47191E-11 to 9.49083E-11	462	0.0462		<=9.49083E-11	9231	0.9231		=>9.49083E-11	769	0.0769
9.49083E-11 to 1.05098E-10	292	0.0292		<=1.05098E-10	9523	0.9523		=>1.05098E-10	477	0.0477
1.05098E-10 to 1.15287E-10	204	0.0204		<=1.15287E-10	9727	0.9727		=>1.15287E-10	273	0.0273
1.15287E-10 to 1.25476E-10	105	0.0105		<=1.25476E-10	9832	0.9832		=>1.25476E-10	168	0.0168
1.25476E-10 to 1.35665E-10	57	0.0057		<=1.35665E-10	9889	0.9889		=>1.35665E-10	111	0.0111
1.35665E-10 to 1.45854E-10	49	0.0049		<=1.45854E-10	9938	0.9938		=>1.45854E-10	62	0.0062
1.45854E-10 to 1.56044E-10	23	0.0023		<=1.56044E-10	9961	0.9961		=>1.56044E-10	39	0.0039
1.56044E-10 to 1.66233E-10	19	0.0019		<=1.66233E-10	9980	0.998		=>1.66233E-10	20	0.002
1.66233E-10 to 1.76422E-10	10	0.001		<=1.76422E-10	9990	0.999		=>1.76422E-10	10	0.001
1.76422E-10 to 1.86611E-10	7	0.0007		<=1.86611E-10	9997	0.9997		=>1.86611E-10	3	0.0003
1.86611E-10 to 1.96801E-10	2	0.0002		<=1.96801E-10	9999	0.9999		=>1.96801E-10	1	0.0001
1.96801E-10 to 2.0699E-10	1	0.0001		<=2.0699E-10	10000	1		=>2.0699E-10	1	0.0001
>2.0699E-10	0	0
Bin Size	1.01892e-11
Number of bins	21
# of Sims	Avg Value	% Chg		Std Dev.	% Chg
125	5.8698e-11			2.45692e-11
250	5.76551e-11	-0.0177672		2.50197e-11	0.0183329
500	5.71707e-11	-0.00840062		2.44239e-11	-0.023811
1000	5.7779e-11	0.0106391		2.48928e-11	0.0191982
2000	5.73116e-11	-0.00808833		2.39895e-11	-0.0362896
4000	5.78276e-11	0.00900278		2.39749e-11	-0.000606485
8000	5.78898e-11	0.00107588		2.42624e-11	0.0119899
10000	5.79825e-11	0.00160077		2.40791e-11	-0.0075555

## Sheet: HQ Results
HQ Results
Minimum result	4.9259e-05				0.000197861	Study value
Maximum result	0.000761222				0.4995	of results are equal or lower
Expected value	0.000213235				0.5005	of results are equal or greater
Std Deviation	8.85528e-05
Out of 10000 simulations		Of those with numeric values:
10000 had numeric values.			5% <=	9.84273e-05
0 had error values.			10% <=	0.000116399
			15% <=	0.000130113
			20% <=	0.000141509
			25% <=	0.000151392
			30% <=	0.000161103
			35% <=	0.000170346
			40% <=	0.00017959
			45% <=	0.000188627
			50% <=	0.000197921
			55% <=	0.000207721
			60% <=	0.00021864
			65% <=	0.00023015
			70% <=	0.000242418
			75% <=	0.000257727
			80% <=	0.000274377
			85% <=	0.000295184
			90% <=	0.00032738
			95% <=	0.00038302
			100% <=	0.000761222
If HQ is:				0.000197861	0.4995	of results are equal or lower
(Chg to do what ifs)					0.5005	of results are greater
					Cumulative				Cumulative
HQ	frequency:				frequency:				frequency:
<=4.9259E-05	1	0.0001		<=4.9259E-05	1	0.0001		=>4.9259E-05	10000	1
4.9259E-05 to 8.67308E-05	272	0.0272		<=8.67308E-05	273	0.0273		=>8.67308E-05	9727	0.9727
8.67308E-05 to 0.000124203	982	0.0982		<=0.000124203	1255	0.1255		=>0.000124203	8745	0.8745
0.000124203 to 0.000161674	1783	0.1783		<=0.000161674	3038	0.3038		=>0.000161674	6962	0.6962
0.000161674 to 0.000199146	2028	0.2028		<=0.000199146	5066	0.5066		=>0.000199146	4934	0.4934
0.000199146 to 0.000236618	1709	0.1709		<=0.000236618	6775	0.6775		=>0.000236618	3225	0.3225
0.000236618 to 0.00027409	1219	0.1219		<=0.00027409	7994	0.7994		=>0.00027409	2006	0.2006
0.00027409 to 0.000311561	775	0.0775		<=0.000311561	8769	0.8769		=>0.000311561	1231	0.1231
0.000311561 to 0.000349033	462	0.0462		<=0.000349033	9231	0.9231		=>0.000349033	769	0.0769
0.000349033 to 0.000386505	292	0.0292		<=0.000386505	9523	0.9523		=>0.000386505	477	0.0477
0.000386505 to 0.000423977	204	0.0204		<=0.000423977	9727	0.9727		=>0.000423977	273	0.0273
0.000423977 to 0.000461448	105	0.0105		<=0.000461448	9832	0.9832		=>0.000461448	168	0.0168
0.000461448 to 0.00049892	57	0.0057		<=0.00049892	9889	0.9889		=>0.00049892	111	0.0111
0.00049892 to 0.000536392	49	0.0049		<=0.000536392	9938	0.9938		=>0.000536392	62	0.0062
0.000536392 to 0.000573864	23	0.0023		<=0.000573864	9961	0.9961		=>0.000573864	39	0.0039
0.000573864 to 0.000611335	19	0.0019		<=0.000611335	9980	0.998		=>0.000611335	20	0.002
0.000611335 to 0.000648807	10	0.001		<=0.000648807	9990	0.999		=>0.000648807	10	0.001
0.000648807 to 0.000686279	7	0.0007		<=0.000686279	9997	0.9997		=>0.000686279	3	0.0003
0.000686279 to 0.000723751	2	0.0002		<=0.000723751	9999	0.9999		=>0.000723751	1	0.0001
0.000723751 to 0.000761222	1	0.0001		<=0.000761222	10000	1		=>0.000761222	1	0.0001
>0.000761222	0	0
Bin Size	3.74718e-05
Number of bins	21
# of Sims	Avg Value	% Chg		Std Dev.	% Chg
125	0.000215867			9.03554e-05
250	0.000212031	-0.0177672		9.20119e-05	0.0183329
500	0.00021025	-0.00840062		8.9821e-05	-0.023811
1000	0.000212487	0.0106391		9.15454e-05	0.0191982
2000	0.000210768	-0.00808833		8.82233e-05	-0.0362896
4000	0.000212666	0.00900278		8.81698e-05	-0.000606485
8000	0.000212895	0.00107588		8.92269e-05	0.0119899
10000	0.000213235	0.00160077		8.85528e-05	-0.0075555

## Sheet: Simulation Input Values 1
Sim #	BW	Conc	ED
1	79.8621	11.5347	15.5525
2	65.6856	16.4602	15.7219
3	45.6307	18.4605	15.7662
4	57.3992	17.5024	14.6005
5	60.2611	16.6258	15.7496
6	43.8819	11.736	16.0181
7	55.3514	22.4558	15.446
8	53.2075	14.4355	15.3094
9	62.1729	15.2891	15.8082
10	72.5753	6.7832	16.7859
11	73.2451	14.6704	15.8515
12	59.9745	14.2831	16.1538
13	80.9865	13.4479	16.9342
14	41.9089	14.7464	17.0778
15	63.9784	19.8516	16.0585
16	85.7869	14.6411	14.9377
17	64.1348	18.6566	16.7888
18	47.84	22.7422	16.5212
19	63.0006	15.2424	16.4806
20	43.0837	20.3213	15.5607
21	50.1023	19.4935	16.7549
22	59.442	15.158	16.1117
23	56.8827	12.1092	15.7165
24	55.0777	17.413	15.3997
25	47.1676	16.033	16.2803
26	67.8038	17.0468	16.1198
27	68.0027	14.0178	17.1233
28	64.4861	11.6273	16.4392
29	31.7345	17.6235	15.0377
30	66.7153	17.448	15.686
31	60.3196	12.403	14.6864
32	75.5344	17.3423	16.3956
33	74.579	7.90396	16.5739
34	78.9532	20.0773	14.5962
35	70.8481	18.0998	16.6746
36	64.4737	16.4508	17.4829
37	75.8814	16.3736	15.3823
38	54.2085	19.9617	15.8945
39	73.2489	7.58255	15.2437
40	51.8803	29.1724	16.5657
41	71.8918	12.4231	16.0336
42	32.6828	14.8145	15.5582
43	43.3155	10.1418	15.064
44	69.9735	19.275	14.8683
45	72.5147	15.4737	16.3885
46	63.4225	16.1319	16.3892
47	54.7707	20.0637	16.2164
48	74.1864	12.6388	15.4815
49	32.6538	17.5695	16.6977
50	31.4066	14.7028	17.1036
51	27.4569	19.2504	16.303
52	70.7903	6.68645	14.3033
53	62.8219	21.1398	16.4414
54	54.3219	10.612	16.1439
55	48.1433	11.3707	15.562
56	48.8801	10.3102	16.0718
57	86.9089	8.28536	17.1225
58	60.8901	13.6422	16.5651
59	39.724	27.835	15.3809
60	40.5444	13.9719	14.5951
61	80.2749	11.1499	16.0873
62	53.7377	11.7728	16.7239
63	71.6305	14.9397	15.9897
64	85.2423	12.0408	15.8122
65	78.1682	6.11919	15.7314
66	70.0997	19.5815	15.4133
67	64.9086	17.9316	15.9646
68	50.4193	12.6094	17.3148
69	45.7799	11.4254	15.3456
70	39.6804	20.5831	15.2125
71	53.8593	18.2718	15.8493
72	43.8058	12.2526	16.7691
73	69.6843	17.1058	16.0832
74	65.4899	12.4999	14.49
75	61.5794	18.7498	15.6913
76	38.8516	9.29265	14.6791
77	71.7068	16.4014	15.5814
78	59.3281	12.2596	15.2638
79	56.1953	18.4782	15.7259
80	82.689	19.2464	15.3942
81	89.1143	12.2541	15.2528
82	39.9934	14.6489	14.7794
83	50.6467	14.4357	15.4091
84	64.8969	19.0645	16.7358
85	41.0542	15.3793	14.3543
86	68.7205	13.1548	15.5883
87	59.3222	15.7754	16.0211
88	58.8716	16.9006	16.8476
89	44.7809	17.6374	15.1885
90	73.8691	7.89343	16.2446
91	58.3107	14.0559	15.7418
92	57.3257	21.7667	15.214
93	61.5077	18.9103	15.3123
94	57.4781	16.4608	15.9764
95	49.5142	15.522	15.1027
96	68.8738	15.738	16.8328
97	64.4798	17.7678	16.609
98	49.896	19.7708	15.5249
99	46.4533	17.5216	15.6377
100	64.2489	21.4214	15.4311
101	65.5143	21.8807	17.26
102	39.3844	13.0857	16.1503
103	72.435	10.176	15.4964
104	67.0815	20.7937	16.0623
105	68.424	14.2918	15.482
106	66.5792	20.8635	14.6491
107	73.2874	8.22818	15.4823
108	59.7953	14.7074	14.3955
109	63.5101	20.5395	15.7176
110	79.8456	19.9959	16.6362
111	54.6873	17.1803	14.1978
112	44.0271	9.67584	16.0715
113	75.0109	8.5638	15.5081
114	41.0516	16.4602	16.0663
115	28.7655	11.7397	15.7934
116	76.7819	24.9924	16.0475
117	75.5249	15.0469	15.3669
118	68.1574	11.42	16.3112
119	65.3096	14.4274	16.5061
120	70.1737	13.6367	15.4552
121	46.3093	17.4144	15.6583
122	73.8449	6.73912	15.6333
123	76.1655	24.1374	15.1814
124	35.4325	16.5419	15.6904
125	28.5492	13.9575	15.6376
126	49.4953	9.5754	15.9767
127	80.6948	18.3343	16.5911
128	38.9121	12.897	16.284
129	68.7728	14.6684	16.6564
130	64.6513	15.3099	16.9192
131	101.18	15.6282	17.0133
132	46.8474	14.6924	16.145
133	62.5449	17.1639	16.0768
134	81.9747	16.8216	14.9337
135	58.8492	19.9526	16.0789
136	53.1601	18.1647	16.3397
137	63.0454	11.1795	17.4219
138	72.1445	12.4454	14.3931
139	77.9339	9.33205	16.228
140	69.3163	11.955	14.956
141	61.4813	18.1824	16.4836
142	71.6415	19.4095	15.9772
143	60.3601	13.1057	15.7579
144	31.8124	9.31287	15.9219
145	88.8158	10.4098	14.8711
146	88.6502	16.3491	16.4883
147	80.5435	15.6014	15.6571
148	48.9617	10.3976	15.3746
149	87.014	14.276	15.687
150	62.7792	16.2166	14.6581
151	54.3479	16.0536	15.7081
152	57.2218	18.9947	17.5046
153	44.4238	10.3353	17.0749
154	74.0514	8.12829	16.5465
155	35.6566	10.8953	14.3658
156	88.0994	18.5766	14.7604
157	68.5259	7.32893	16.0294
158	63.3129	15.5474	17.1306
159	91.0531	11.9944	15.437
160	65.8674	12.0327	17.1412
161	76.8014	21.0455	16.6653
162	28.0111	24.187	16.2042
163	45.6071	13.0626	16.2158
164	53.5608	10.782	16.3574
165	62.5599	13.8814	15.7031
166	48.4469	16.0045	15.2539
167	66.1371	16.0692	16.8312
168	58.9695	9.8069	16.1217
169	54.6794	12.2286	16.0153
170	39.1734	16.637	16.527
171	50.2486	7.52581	17.0169
172	60.6012	12.8373	17.9504
173	53.0179	19.7586	15.001
174	49.444	15.3396	16.7687
175	63.3457	13.2401	15.7217
176	110.535	17.8299	16.2994
177	37.2985	16.9243	15.3925
178	27.1713	13.8119	15.734
179	49.3789	9.74348	15.2994
180	71.9588	18.057	16.1035
181	49.3508	12.1924	16.5988
182	74.745	12.7474	16.1991
183	50.9037	15.4996	15.6044
184	44.5183	18.6535	15.6612
185	102.369	16.2694	16.6246
186	61.9905	16.4312	14.4301
187	37.2166	10.397	14.6748
188	94.3142	13.04	15.96
189	86.866	11.8994	15.1174
190	61.9745	15.463	15.4608
191	31.1386	19.4273	15.0729
192	45.546	9.0918	16.4247
193	49.0127	11.1691	15.9003
194	62.469	25.0423	17.3228
195	48.3231	12.1913	16.1268
196	43.491	17.1895	15.7651
197	85.1727	18.2155	16.3395
198	26.1278	20.7146	14.7948
199	55.9762	10.2518	16.0455
200	40.5515	25.3919	15.7555
201	64.1368	16.9916	15.3049
202	68.9192	11.4486	16.9936
203	44.7896	15.1576	15.3826
204	74.4473	17.0821	15.1654
205	40.5587	15.9675	16.2869
206	53.135	19.0364	15.749
207	65.686	8.40479	15.6742
208	54.589	19.3041	16.8923
209	85.3888	17.7016	15.2453
210	75.0866	11.346	15.6993
211	81.8162	13.7271	16.8072
212	62.4401	21.6028	15.5061
213	51.3061	18.9381	15.378
214	57.8934	18.1562	15.5425
215	51.9259	14.5711	16.1692
216	41.6625	13.6901	15.2187
217	78.051	11.3487	15.7487
218	57.9511	20.4006	15.2911
219	57.946	13.6283	16.1687
220	64.0106	14.2074	16.1131
221	66.3981	13.9723	14.6252
222	74.4754	19.9741	16.5669
223	72.3599	17.8161	15.583
224	92.4443	15.3735	15.2374
225	29.7907	15.9767	15.1499
226	52.2608	15.5249	14.4193
227	51.7104	13.9269	15.4024
228	45.773	18.3687	16.0394
229	48.8706	16.5263	16.5099
230	76.1233	14.6573	15.9746
231	64.9053	16.6562	16.6652
232	50.9931	16.6168	15.5344
233	75.279	12.373	15.7461
234	78.9391	12.7799	16.5867
235	26.8879	13.0127	16.1002
236	47.4505	21.1538	16.7261
237	63.442	15.8329	16.3081
238	55.2514	14.4942	15.308
239	45.5287	16.0429	15.7669
240	71.3903	7.96389	16.866
241	67.6008	14.0863	15.8825
242	72.5173	18.5563	15.7424
243	68.6168	14.962	15.3246
244	64.632	16.3762	16.7107
245	92.0678	16.8119	14.3913
246	49.2176	20.5157	15.0415
247	42.0483	10.7106	16.4037
248	81.2186	18.841	16.3812
249	69.4021	8.9513	15.7549
250	54.0461	13.9941	17.2249
251	54.1024	10.0444	16.4362
252	76.8272	18.5255	15.1099
253	47.6103	9.30151	15.8442
254	69.8543	15.5043	16.1666
255	77.5132	18.2801	15.6035
256	64.9191	17.3019	16.0534
257	45.8529	9.05821	15.9602
258	44.2369	24.7547	15.7291
259	64.827	6.28852	15.9623
260	61.9112	10.653	14.2044
261	84.6085	16.0499	16.6088
262	94.4393	10.9416	16.3058
263	94.872	19.3704	15.1613
264	62.6827	10.5279	16.142
265	46.1476	21.5634	15.8278
266	53.0998	9.11893	14.6021
267	78.4714	25.5553	16.6102
268	73.342	22.8012	15.0768
269	55.7198	14.0328	16.3471
270	53.9954	13.879	17.2627
271	64.6314	6.56284	16.3911
272	68.4418	7.2252	15.3247
273	74.1224	20.8711	16.3439
274	61.3716	9.12351	16.5474
275	72.3051	11.6303	18.0145
276	57.1145	10.4919	16.4652
277	53.786	14.1153	16.0397
278	68.4626	11.3408	15.8759
279	62.139	10.7583	14.7042
280	48.908	14.4305	15.8927
281	54.1706	16.3463	14.9301
282	63.8296	20.7543	14.4756
283	75.3604	14.2855	16.6493
284	37.8398	24.7667	15.1246
285	92.7694	17.4814	16.0893
286	58.4139	20.5217	14.2573
287	71.9544	17.2021	16.1645
288	74.3033	13.0458	16.1985
289	81.274	13.8424	17.1243
290	82.2225	18.4882	15.611
291	63.5231	14.8456	15.4335
292	64.7299	16.4971	15.8291
293	46.1751	8.08668	16.6198
294	32.7644	17.5138	15.3965
295	64.0989	31.3914	15.9033
296	77.3729	18.1883	15.1454
297	63.0629	14.1573	15.5904
298	74.8712	13.0327	15.8013
299	61.5039	13.7486	16.4122
300	48.9502	13.3765	16.2744
301	80.7043	18.6984	15.9721
302	84.4827	18.0225	14.6744
303	66.1171	24.9345	16.8232
304	66.9977	16.8173	14.3832
305	33.9778	16.2364	17.1642
306	90.4084	15.6774	16.1075
307	72.5988	20.4783	15.1128
308	88.9781	11.3251	15.9809
309	61.5682	19.2635	15.0514
310	63.2439	9.93837	15.7307
311	51.6812	12.0269	17.3967
312	60.7061	12.2945	14.8215
313	63.1136	16.2427	17.0782
314	62.1147	18.1998	16.4338
315	59.8335	18.0755	15.0389
316	87.4845	22.2429	16.1199
317	75.8472	20.0627	16.1682
318	63.2395	26.7204	16.0981
319	68.0603	18.0891	15.065
320	66.9311	14.8245	14.7793
321	53.1641	15.8715	16.3563
322	64.332	19.3269	15.5526
323	83.6167	15.7834	16.5232
324	41.3692	13.6388	14.9972
325	68.2863	18.4466	14.7133
326	60.6663	10.6645	16.4658
327	76.096	18.858	16.9707
328	83.0667	12.0859	15.7577
329	63.4005	13.7018	15.2113
330	32.7312	15.2396	16.0916
331	67.3727	9.10979	15.4881
332	64.6655	16.203	14.7866
333	60.2583	19.0723	17.62
334	27.079	9.77881	16.4522
335	69.6645	6.59454	16.9442
336	37.2695	18.8881	15.1697
337	71.789	9.3404	15.9698
338	68.1157	26.1198	15.6365
339	81.721	12.6623	15.9053
340	45.4651	17.0986	16.6427
341	68.2383	11.9414	15.2464
342	55.1144	17.8971	16.1693
343	67.4458	23.8815	15.2843
344	55.6549	20.6482	15.6451
345	40.7349	16.1724	17.1378
346	62.2751	16.9454	15.5555
347	106.541	15.714	16.0737
348	81.9076	29.6625	16.1206
349	44.7716	18.5579	14.8054
350	76.5986	15.53	15.1125
351	83.1417	14.2205	16.8464
352	100.015	15.2522	16.297
353	44.7675	18.2862	17.07
354	62.8223	10.3314	16.1908
355	87.8523	13.8582	15.8657
356	60.075	26.5542	16.9607
357	83.6431	5.96429	15.1566
358	52.2224	13.8828	15.3745
359	39.3398	21.4789	16.0964
360	63.4547	11.1078	16.9189
361	45.3175	13.1162	17.0227
362	87.1489	13.3156	15.8415
363	80.4505	21.1743	15.6414
364	78.0604	13.5234	14.9072
365	56.0959	10.8252	16.1681
366	71.603	21.0747	16.07
367	70.9109	15.3369	17.3528
368	68.5322	17.6267	15.5386
369	68.259	11.0879	16.3748
370	74.2215	15.3242	15.6188
371	63.7721	13.2238	15.2653
372	66.7404	16.8474	16.5466
373	34.6914	11.6383	16.6219
374	69.1749	23.8495	14.7321
375	69.9729	21.2929	15.1089
376	56.0289	13.9708	15.5402
377	89.8224	22.2098	14.7494
378	59.8887	23.1266	16.6306
379	84.7038	13.843	15.2751
380	68.5092	20.128	16.0178
381	84.6155	17.5564	16.277
382	73.1332	12.3363	15.2938
383	77.0676	12.6638	15.4947
384	68.6095	18.5337	16.8315
385	65.266	14.2909	17.9809
386	48.2452	16.412	16.8286
387	61.0396	20.7985	15.6391
388	61.0797	21.7141	15.2577
389	109.213	7.11073	15.5613
390	45.3279	16.9274	16.5818
391	52.056	15.7978	14.9632
392	88.9422	9.74744	17.028
393	33.9822	15.8802	16.0376
394	46.496	15.1738	18.2148
395	51.3729	22.8896	16.6974
396	39.6427	13.9954	16.5396
397	47.6137	15.344	15.1948
398	73.0894	13.9721	15.171
399	85.4598	12.8679	16.4919
400	52.0073	16.405	15.9876
401	66.3278	6.19704	16.9399
402	46.0951	22.3924	16.3906
403	37.0374	23.1978	15.2172
404	64.2929	7.76192	16.8178
405	37.1979	6.26703	16.1459
406	66.9782	15.6909	16.9477
407	64.9565	20.6373	16.2635
408	75.7949	15.9169	16.3933
409	88.2266	22.6004	16.1609
410	48.4202	13.4743	16.2306
411	42.0347	21.8893	14.6903
412	52.7851	23.2418	15.857
413	59.8376	22.8197	16.1652
414	83.2289	22.6174	15.9937
415	33.6594	11.9192	16.3498
416	54.7656	14.0212	15.6356
417	47.2303	13.8193	15.6739
418	62.9336	11.2574	15.1601
419	30.9766	16.2415	15.9646
420	43.0351	10.2112	15.9402
421	47.4516	17.2463	15.6012
422	81.1684	11.8376	16.1659
423	65.4513	16.3491	14.8359
424	63.6203	15.1192	15.7409
425	62.6549	13.6808	16.9222
426	93.3065	13.8771	16.3676
427	59.3099	13.7778	15.8295
428	91.2319	13.3096	15.81
429	57.6956	15.3028	16.9211
430	60.7312	24.9592	14.585
431	72.3526	16.8245	14.2122
432	40.0806	13.5642	16.6606
433	67.3824	13.673	15.7553
434	56.7904	17.6529	15.8421
435	67.7898	5.95723	15.0724
436	56.5173	11.8221	16.3266
437	51.4628	14.9883	16.6021
438	72.6536	17.5874	14.4075
439	44.4952	19.8509	15.9901
440	56.6468	11.7347	15.8428
441	63.0633	19.3744	14.8348
442	79.4291	15.7783	16.3327
443	38.9571	17.9631	16.2326
444	62.8998	22.9494	15.6979
445	30.9685	13.5593	15.46
446	65.3736	21.0983	15.7911
447	78.2	13.2581	15.0744
448	60.8316	15.8355	14.8669
449	68.5454	15.3194	14.6801
450	54.194	16.6938	16.9311
451	56.7013	16.0264	16.0029
452	66.1539	18.2799	15.8866
453	43.8541	17.6694	15.5885
454	63.3586	14.8275	16.264
455	90.4431	23.0128	16.4711
456	54.7843	9.56855	15.7558
457	90.5836	11.3474	16.4614
458	46.6601	15.2437	15.8912
459	62.176	9.27526	16.4785
460	63.1089	16.4381	16.3239
461	39.8675	11.3483	15.3036
462	60.5181	22.0253	16.0226
463	71.6577	7.97001	14.9516
464	69.2978	16.5392	15.1075
465	46.6735	15.5932	15.2341
466	60.4905	21.7321	15.6726
467	68.9696	19.2228	16.953
468	82.2842	18.4986	14.9055
469	79.388	17.9576	16.2871
470	56.6093	16.9545	16.3457
471	28.3771	14.7564	16.4787
472	70.121	20.8162	16.3813
473	60.8339	19.8197	14.4528
474	36.0921	14.6349	16.1856
475	28.47	20.3484	17.6168
476	57.3647	16.1388	14.9756
477	94.0132	14.3164	14.7298
478	61.2805	11.9976	16.1427
479	70.1638	17.6343	16.1399
480	84.876	15.158	16.4602
481	61.123	25.6571	15.8524
482	55.658	27.128	16.8951
483	74.0297	15.3221	16.8103
484	80.5746	10.597	16.7205
485	66.7958	10.4182	15.1779
486	69.37	16.8205	14.9955
487	74.6539	13.2208	16.0579
488	76.9014	13.0541	16.0577
489	55.5993	21.4846	16.6887
490	76.0912	10.321	16.0114
491	55.6897	25.0876	16.3549
492	70.5456	12.0847	16.4302
493	68.6287	12.3266	16.6445
494	66.2742	11.0155	16.6709
495	39.7435	19.5129	14.4341
496	52.2703	20.1328	16.0296
497	70.6381	18.2172	16.4575
498	44.1004	12.9847	15.4573
499	63.9182	15.9992	14.8623
500	52.4728	15.2371	15.2524
501	51.8097	13.879	16.0323
502	55.5628	15.8865	16.1182
503	41.9042	22.2075	15.9049
504	49.2172	8.29316	17.1322
505	57.878	22.8195	15.3888
506	69.3872	14.891	15.7511
507	60.9175	9.80699	14.2079
508	63.7838	18.3978	16.2721
509	67.0451	17.9657	15.9272
510	33.0602	17.6639	16.0916
511	34.0631	22.1493	16.7133
512	76.0169	13.403	16.235
513	48.5207	9.96946	15.9939
514	80.3338	9.91159	15.4091
515	94.8032	12.0445	15.8945
516	38.3731	18.1642	16.1517
517	67.2567	17.9263	17.8283
518	70.6292	20.2598	13.3287
519	66.8639	13.8046	15.9513
520	60.7459	18.479	16.0132
521	65.942	12.7172	16.0706
522	71.7322	8.63992	15.3698
523	90.8886	23.4854	16.2841
524	71.8883	15.2991	16.1454
525	52.9934	12.0681	15.5767
526	58.1683	25.1898	15.424
527	52.8771	14.4957	16.1346
528	83.0132	21.4737	15.6188
529	79.7913	9.76324	16.5041
530	61.8472	9.80521	15.888
531	64.5997	14.7143	16.514
532	59.8535	18.4277	14.4861
533	40.6109	14.2142	16.3445
534	43.5657	17.9367	14.7732
535	64.5941	8.09162	16.4841
536	67.2593	16.0196	15.6605
537	61.8387	15.7748	17.2236
538	51.3273	15.9506	16.0825
539	66.0767	19.3901	16.3952
540	82.3283	9.61704	15.8933
541	61.3551	12.3314	15.86
542	56.7822	20.6276	15.4261
543	55.3555	8.75442	15.1395
544	72.6794	6.86147	16.7283
545	40.2605	19.516	15.7231
546	68.2724	9.16643	17.4523
547	77.1309	19.1282	16.7075
548	63.5853	16.1535	15.9155
549	52.347	16.3759	16.5629
550	42.4619	14.849	15.7999
551	63.6688	21.8248	15.3669
552	76.6725	12.9555	15.8452
553	68.4808	14.5834	15.0605
554	55.2066	21.917	15.3086
555	55.8713	20.8674	16.8162
556	29.2988	30.4906	15.0451
557	32.4264	9.13642	16.0511
558	57.1613	13.7034	14.428
559	60.3299	18.4469	15.9732
560	43.1211	11.6942	16.2366
561	71.0843	18.982	17.9503
562	59.5133	7.90127	14.4842
563	77.6835	13.064	16.3497
564	73.0475	15.7523	16.7971
565	55.7345	18.8313	17.5401
566	55.5387	15.0883	15.1641
567	39.1032	13.4229	14.7799
568	48.9471	14.5274	14.7871
569	94.1443	12.5575	15.6536
570	54.3308	20.4859	16.3979
571	70.6493	7.69185	16.5776
572	89.0928	9.0336	15.5527
573	45.6818	15.525	16.7396
574	90.0488	15.1504	15.5874
575	60.2958	20.9557	16.2313
576	31.827	17.0712	14.3029
577	76.6587	10.3503	17.3846
578	56.2457	17.882	16.6882
579	38.1043	14.6385	16.5447
580	43.9147	15.6022	15.9033
581	73.3228	19.4812	15.1802
582	80.4265	18.4823	16.9176
583	37.9743	17.3576	15.1812
584	66.174	10.7336	15.0989
585	82.1278	7.77924	15.563
586	60.8609	13.7381	15.8219
587	37.845	15.1919	14.6099
588	75.5295	22.3265	15.8946
589	58.3662	13.8264	15.6946
590	40.1313	20.615	16.1394
591	42.9419	14.1294	16.5856
592	69.6402	13.569	16.6691
593	61.231	16.2174	15.4984
594	64.7714	16.2616	16.6068
595	58.5182	15.6109	14.8285
596	73.4487	13.6272	16.8593
597	82.9291	14.8991	15.061
598	55.4564	10.4701	15.0456
599	48.814	19.6712	16.6493
600	41.3966	10.392	16.4979
601	45.3412	16.6723	16.0298
602	39.8989	16.0407	16.6806
603	92.7107	16.851	15.1675
604	73.6372	13.3369	16.7201
605	61.6077	16.1675	16.2461
606	29.2118	14.9684	16.4481
607	49.4586	21.6007	15.6444
608	63.6346	14.3578	15.015
609	98.4312	11.1989	15.8484
610	58.342	16.4472	14.6987
611	42.4169	18.9798	17.0954
612	38.3162	20.3111	15.796
613	68.088	21.1007	16.5446
614	71.9172	15.5601	15.8746
615	89.9922	17.0992	14.8852
616	49.4908	13.7984	16.467
617	89.6549	22.2854	16.2479
618	79.1402	17.5838	15.1304
619	46.1672	7.94646	15.4792
620	67.4048	18.7201	15
621	90.8176	19.1906	16.2494
622	64.9529	23.4643	16.4411
623	38.6712	16.1497	16.6621
624	40.5326	12.8856	16.105
625	29.1665	17.9809	15.6544
626	89.3027	13.3518	15.1127
627	55.1379	12.1068	14.8553
628	55.6012	13.4242	16.3579
629	68.9582	14.5405	17.0477
630	87.7504	8.4863	15.8776
631	53.057	11.0179	16.1467
632	56.8221	22.9934	15.7962
633	59.5842	6.1483	17.5891
634	82.2236	17.2712	15.1627
635	74.1351	7.25726	16.8455
636	68.7147	17.2616	15.9329
637	62.1312	18.6614	16.5562
638	43.2271	15.8309	15.8404
639	74.5237	24.6053	17.0519
640	70.2859	19.9191	16.7036
641	64.2132	10.9907	16.2105
642	39.8099	20.2543	16.168
643	64.6812	14.6021	16.8516
644	72.4259	17.7024	15.0564
645	33.5644	17.1811	15.5222
646	68.0362	14.2767	14.7514
647	88.9888	11.6612	16.241
648	74.7391	11.0072	16.1308
649	61.6651	10.6113	16.5987
650	74.8308	17.9375	16.4215
651	71.817	22.6676	16.6843
652	74.7861	13.5486	15.6077
653	55.8807	11.1653	16.1679
654	56.4101	15.9961	15.0681
655	69.0059	17.3726	16.6671
656	45.2993	20.9817	15.7316
657	73.2217	20.2921	15.6575
658	62.7804	23.3818	15.7567
659	64.1682	13.9513	15.9327
660	87.8443	16.9059	16.3628
661	47.1992	18.2947	14.8717
662	45.0897	16.4776	16.6155
663	53.18	6.25881	16.126
664	43.1318	13.1267	16.1842
665	52.9611	16.1827	16.7007
666	76.4246	14.8579	15.9355
667	46.3633	13.6574	16.195
668	78.1227	15.3733	16.8736
669	80.1177	17.4812	16.8742
670	53.3753	19.2081	16.2552
671	76.061	20.1842	16.2833
672	74.2898	11.9511	16.5316
673	67.0466	18.2111	15.7169
674	62.8411	17.6486	14.9799
675	28.1931	16.0074	15.7958
676	74.7253	11.1873	16.4136
677	37.5557	12.8621	16.8235
678	54.9672	11.4222	15.8818
679	82.778	16.0821	15.3069
680	80.3019	15.7616	16.2735
681	37.6999	16.4683	16.6007
682	74.5517	21.6038	17.4463
683	48.1639	7.52635	15.1455
684	61.1624	6.61321	16.3713
685	92.2034	16.6236	15.8684
686	59.4371	17.946	17.2064
687	94.4839	14.7576	16.4205
688	44.6551	14.8284	15.0297
689	70.9986	13.38	14.747
690	49.0323	17.1951	15.0069
691	52.7276	18.729	16.0145
692	43.3582	7.80231	15.6533
693	59.9204	13.5268	14.3234
694	44.1488	12.9357	16.3608
695	64.0224	14.2156	15.1827
696	65.148	16.6852	16.3295
697	47.5413	16.3999	16.2842
698	65.7611	10.5543	15.313
699	70.3232	21.8525	15.8127
700	77.1187	13.9339	16.4452
701	74.0926	14.5811	15.262
702	73.6262	14.408	16.9757
703	79.8347	14.043	14.776
704	78.3735	15.7319	15.7694
705	44.4257	22.4795	15.823
706	49.8624	22.5556	15.2065
707	49.5377	16.5955	15.1051
708	44.1803	18.526	14.9437
709	78.7645	15.3587	16.1706
710	62.0414	16.6894	15.2456
711	84.7025	13.5434	16.4882
712	38.9033	8.23182	16.3512
713	58.8733	18.2994	15.9806
714	54.0453	16.7492	16.0926
715	44.5088	23.391	16.1464
716	39.7475	10.548	16.9235
717	54.9724	13.8612	15.583
718	68.0058	12.5447	15.8902
719	68.3393	16.6419	17.2871
720	42.3758	17.7948	14.884
721	41.3656	25.1776	15.853
722	83.2351	12.9009	16.8069
723	78.7297	18.3014	15.3856
724	107.547	18.0157	17.0821
725	64.7448	11.9031	16.103
726	76.339	14.0367	16.8079
727	75.4017	18.9682	15.1716
728	75.9	12.7598	16.9468
729	56.2057	14.3293	14.951
730	96.0511	18.286	14.8283
731	48.5892	13.2438	17.0685
732	41.8039	12.0519	15.2514
733	83.4682	15.5917	15.8452
734	62.1256	20.4623	14.9496
735	65.4376	16.0509	16.7086
736	48.4962	8.83631	16.9511
737	67.8535	12.3277	14.7061
738	43.897	17.2334	15.9814
739	67.1068	8.78682	14.9108
740	75.8467	11.435	16.2718
741	73.0606	14.3552	16.9453
742	53.3216	16.6908	14.4656
743	84.3702	20.1676	16.3411
744	76.6024	11.5239	15.5114
745	74.7768	15.0349	14.6456
746	73.7685	14.9467	16.0121
747	75.8046	14.4847	14.6823
748	62.9879	17.4862	16.329
749	75.0021	15.047	16.415
750	50.4991	21.6295	15.2146
751	68.7609	14.2156	15.0824
752	95.1828	7.65031	15.5112
753	65.413	9.77498	15.6407
754	60.8559	18.647	16.4757
755	50.8046	11.9372	16.0991
756	58.4727	19.5324	15.5521
757	55.1942	10.4335	15.0505
758	57.8693	8.88663	15.3457
759	56.659	10.4823	16.2609
760	58.1411	21.0928	16.2133
761	54.5625	21.4442	15.6797
762	69.5287	20.748	16.3927
763	79.7305	14.553	15.9123
764	72.0038	13.7692	16.5954
765	50.676	14.4394	16.5781
766	60.2124	17.4674	16.6067
767	67.7018	19.9111	15.4925
768	43.6135	12.4567	16.274
769	34.3946	7.62468	15.5634
770	56.7123	13.3105	15.7583
771	90.0077	14.0687	14.858
772	52.39	25.757	16.0854
773	69.3364	19.2538	16.635
774	55.6905	17.082	15.8539
775	62.5453	11.6153	16.2569
776	29.198	23.7241	17.4656
777	56.2868	23.1235	15.6147
778	63.5824	16.7198	16.3337
779	40.5573	13.7286	15.7177
780	40.0717	18.8312	15.401
781	52.648	18.1537	15.4232
782	111.36	16.1525	16.6737
783	61.8652	15.0172	16.494
784	65.0226	10.2692	15.6827
785	110.844	10.1736	15.6464
786	59.2181	16.5517	15.388
787	63.6597	13.7716	16.4719
788	54.1414	15.4773	15.3763
789	52.6355	13.3023	15.2402
790	64.1189	12.4188	17.4081
791	83.272	11.2033	16.214
792	74.9023	11.6757	16.0066
793	61.3092	11.6604	15.7745
794	105.455	21.2021	15.2564
795	49.2519	14.365	15.964
796	93.9765	24.6815	15.3302
797	44.65	24.7217	16.105
798	67.7754	9.40678	16.4719
799	70.3299	8.43993	14.456
800	75.3744	13.6953	15.539
801	39.7867	12.7864	15.1665
802	58.9497	9.57862	15.6311
803	82.7925	14.4974	17.3995
804	71.8052	22.124	15.077
805	68.3935	11.8567	15.0606
806	90.8303	8.86412	16.1816
807	43.8165	10.0438	15.4639
808	51.5134	17.5668	16.0115
809	45.9831	8.9688	14.9186
810	42.4314	10.7644	15.783
811	59.9117	19.2033	14.8165
812	49.0272	16.613	15.324
813	68.5357	21.8353	15.6298
814	70.6396	23.5637	14.0061
815	61.9026	11.4579	14.048
816	76.0534	15.1511	15.8656
817	106.948	14.3018	15.6753
818	35.3567	15.1719	16.232
819	70.7216	18.1098	16.5434
820	29.8364	18.5016	16.2504
821	37.2058	21.1294	15.7708
822	29.469	23.751	16.3266
823	70.091	10.6667	14.8478
824	49.6164	18.2074	16.0935
825	60.271	21.0847	15.9321
826	51.3962	14.6659	15.786
827	65.8433	13.8518	14.9037
828	91.2916	12.2447	15.33
829	63.197	16.3419	16.394
830	101.131	16.2631	16.9186
831	79.7146	13.8641	15.975
832	70.0196	19.3158	16.1291
833	75.8603	13.8944	16.6359
834	73.3314	18.572	16.3209
835	64.4868	13.0316	15.2583
836	64.9456	14.9298	15.8678
837	62.4696	11.1126	16.2313
838	45.1273	19.1157	14.9738
839	53.5685	24.2927	15.5867
840	73.0239	16.311	16.9061
841	78.1087	15.6495	16.5907
842	88.8433	15.381	16.0697
843	78.7092	11.5486	14.4091
844	60.1527	21.3834	15.3229
845	70.0059	13.1097	15.0072
846	77.2072	12.9213	16.0922
847	54.796	20.3425	15.5503
848	59.4505	7.49391	15.4516
849	78.7848	17.2874	15.7071
850	70.8172	10.7801	15.1605
851	87.9866	19.0786	14.7483
852	42.4323	8.95138	13.6229
853	56.833	13.5505	14.9507
854	52.4752	16.0454	14.4165
855	87.3848	12.3293	16.156
856	51.6548	18.2188	15.8665
857	58.5716	15.0776	16.3284
858	47.8879	13.0323	14.8781
859	64.057	17.121	15.6167
860	46.1156	16.8433	16.5609
861	47.9272	17.0628	15.8726
862	75.2307	16.3176	16.7474
863	43.0452	22.2212	15.3776
864	86.1467	20.3399	15.6095
865	62.6714	16.3239	16.2493
866	89.8269	17.4027	16.2814
867	41.31	14.1762	15.8633
868	46.3706	22.3542	15.5788
869	67.8157	18.4455	15.5791
870	49.5666	19.1915	14.844
871	56.6514	23.2395	15.8853
872	66.5988	9.63895	15.9477
873	59.0302	22.6154	16.9041
874	44.3947	16.6702	16.2906
875	53.4976	6.53055	16.9323
876	48.2973	15.9645	15.6379
877	50.1937	13.5129	14.9549
878	50.4253	24.117	15.4076
879	54.5858	16.9884	16.7629
880	78.251	20.6526	15.802
881	60.7871	20.9885	15.6468
882	56.9127	15.2713	16.3329
883	74.9885	15.6027	15.4583
884	49.5054	16.9318	15.1753
885	47.0981	22.9788	15.662
886	61.4939	15.5472	15.5879
887	65.5375	19.704	16.747
888	65.7539	19.9474	15.5133
889	46.7845	15.5036	16.8893
890	46.4551	14.7812	15.6925
891	66.9555	21.3944	16.6314
892	77.0198	16.4683	16.0878
893	58.9654	7.40603	14.841
894	72.7524	20.2598	16.2631
895	52.764	17.6302	16.7039
896	68.2186	16.1138	16.2882
897	76.4864	20.3532	14.4198
898	58.7951	12.8309	16.2888
899	43.7603	12.9443	15.7116
900	68.0764	14.5508	15.4813
901	49.8233	18.4617	16.1738
902	61.4214	7.68801	15.4262
903	64.338	13.8313	16.6926
904	38.5335	16.3837	15.5005
905	61.7264	19.3863	16.1071
906	82.7729	18.3741	15.6075
907	67.1538	22.8897	15.8019
908	83.1043	6.9253	16.8196
909	64.1506	21.0409	15.5435
910	66.2563	19.2018	15.4613
911	52.4224	14.1524	16.2835
912	52.0804	12.2895	16.9676
913	51.4253	9.93631	15.6406
914	35.9963	15.223	17.4418
915	70.997	13.2792	14.643
916	64.5706	9.96574	16.5591
917	76.6077	16.5824	15.6048
918	66.3371	14.9555	16.6946
919	40.5348	19.6429	15.9396
920	54.7283	17.2471	15.7162
921	57.3172	21.6571	16.0491
922	27.8215	15.45	15.2321
923	60.1498	13.7225	16.3968
924	110.356	15.7129	15.1002
925	83.5714	11.4382	15.2922
926	70.605	19.9277	15.4956
927	58.5664	15.8542	15.234
928	44.4549	12.7015	14.9667
929	62.7578	12.5996	16.4929
930	73.6302	18.3909	14.7167
931	70.3005	12.5142	16.587
932	60.9574	15.1441	14.6218
933	64.6702	27.3583	16.6746
934	60.8988	16.5994	15.192
935	32.9238	23.6127	15.5694
936	74.525	20.3902	16.5268
937	50.7475	20.4444	15.541
938	69.3665	22.959	14.1085
939	63.4814	10.19	15.8696
940	46.4698	19.9239	15.0313
941	52.1462	15.7973	16.6406
942	55.1202	14.6319	15.6478
943	53.6956	17.4265	14.4486
944	36.4111	21.5792	15.2653
945	77.2414	15.9495	14.8992
946	45.2005	16.4617	16.1563
947	35.5109	17.1283	15.5891
948	42.8212	14.3938	15.6855
949	27.9232	15.1157	16.1027
950	59.4382	21.4636	16.5163
951	85.0896	18.7506	16.0121
952	58.8762	12.9168	14.3859
953	33.5447	14.2317	16.0412
954	38.0846	12.0545	14.7149
955	49.4222	12.7127	15.7255
956	61.9647	22.9655	14.9222
957	53.8382	18.4829	16.1602
958	51.7015	11.6128	15.038
959	76.3638	21.6094	14.8737
960	58.9889	8.30257	16.6319
961	67.8533	20.4735	16.3164
962	61.0736	25.2411	15.2578
963	29.0933	19.3539	16.2441
964	67.008	13.4812	15.459
965	54.5992	15.3201	15.9834
966	68.5287	11.4661	15.2221
967	33.7742	15.85	16.6858
968	74.8377	16.3796	15.115
969	68.6145	15.0125	15.913
970	81.3543	25.3488	15.2745
971	60.106	15.8039	16.4199
972	44.4116	6.14019	17.1445
973	63.0712	18.5891	16.1599
974	48.2458	16.6927	15.5251
975	38.4947	17.4549	15.2747
976	93.9123	20.3889	15.5982
977	57.9344	17.6155	17.0404
978	77.9159	21.9919	15.8658
979	79.9456	10.2703	14.8736
980	50.0693	26.2691	16.4114
981	60.5699	14.0868	16.9384
982	57.0566	15.3031	16.7109
983	55.482	15.6846	14.6859
984	71.4827	10.848	15.2933
985	36.3461	16.1478	15.7198
986	65.7284	16.3319	15.3072
987	45.9956	11.4874	15.7605
988	42.4664	10.6173	15.8571
989	52.4884	15.0718	16.067
990	40.5122	17.9805	16.2978
991	74.2447	21.6485	15.6882
992	65.2537	14.4577	15.7303
993	38.276	10.3067	15.5035
994	63.9965	12.8055	16.6393
995	64.4791	17.6501	15.674
996	61.034	19.7813	16.0031
997	47.2975	20.4804	16.0322
998	38.7554	15.2849	16.3501
999	45.9672	20.0072	16.5132
1000	54.8268	18.7486	14.3219
1001	74.4533	23.4069	15.7803
1002	72.0345	15.2686	16.0058
1003	89.772	14.991	16.7586
1004	39.4113	13.78	16.0007
1005	95.7788	18.1015	17.422
1006	61.2477	19.938	15.5714
1007	77.9022	21.4675	16.9108
1008	62.9266	8.39361	17.3417
1009	76.9238	16.9843	16.0901
1010	52.3945	11.3148	16.6719
1011	56.2577	18.7699	16.1845
1012	44.4927	15.3492	16.26
1013	61.101	21.471	16.1268
1014	57.0695	10.3939	17.0566
1015	29.6084	20.7063	17.3089
1016	103.148	13.9985	16.1285
1017	68.4698	11.7745	14.4206
1018	32.2049	15.2309	17.1172
1019	67.8419	18.5374	16.5071
1020	89.0183	22.5022	15.5018
1021	48.0673	16.6928	15.9455
1022	48.5674	16.2717	15.8469
1023	57.9757	10.5184	15.4431
1024	51.0955	14.7518	15.2741
1025	41.4394	19.593	16.7962
1026	82.8946	13.9343	16.438
1027	85.2437	11.9139	15.4008
1028	80.6605	14.3239	16.1802
1029	70.3307	14.6818	15.4859
1030	66.7697	21.3375	16.2882
1031	48.9434	18.1603	15.365
1032	47.3236	13.7278	16.4985
1033	35.3198	19.9241	15.8671
1034	63.6398	13.7969	15.6964
1035	71.857	10.554	16.6974
1036	58.745	9.31495	16.8612
1037	58.9865	12.1285	15.5548
1038	70.189	17.4706	17.154
1039	54.6274	12.4108	15.8959
1040	55.1272	16.1284	16.1692
1041	64.8991	14.9111	15.9045
1042	58.2018	15.0288	15.796
1043	66.5421	8.82746	15.2685
1044	44.3746	10.963	16.4356
1045	63.8451	22.4984	15.8033
1046	49.6212	12.4438	16.5342
1047	57.0575	22.6579	16.4284
1048	70.8634	15.1845	16.008
1049	73.0394	13.6397	14.4286
1050	91.812	15.8592	15.6976
1051	39.3624	11.9343	16.2392
1052	62.0217	11.2162	16.7553
1053	51.8967	10.1078	15.6305
1054	67.6436	9.42676	15.9902
1055	76.4862	11.626	17.3497
1056	68.5529	13.9388	15.0478
1057	75.3889	15.3059	15.5295
1058	59.6048	14.6502	14.492
1059	71.863	10.3337	16.6891
1060	71.6684	19.1391	16.4418
1061	85.2318	18.8241	15.4393
1062	82.1553	23.1583	16.2798
1063	69.3585	11.314	16.435
1064	64.5976	12.7607	17.4783
1065	37.2338	13.9633	15.4545
1066	66.8905	21.0306	15.0414
1067	67.9392	17.6248	15.8893
1068	56.9508	17.9985	15.3049
1069	43.6727	20.1399	15.8932
1070	72.1443	25.2112	15.4715
1071	63.3932	16.9253	15.9553
1072	59.1768	19.7475	16.4846
1073	57.9414	19.3617	13.791
1074	82.2106	13.5519	16.124
1075	47.0174	15.72	15.063
1076	62.4797	17.8371	16.0838
1077	59.0202	7.95534	13.9515
1078	55.078	13.0272	15.8143
1079	51.6999	11.6613	17.5344
1080	28.8131	20.333	17.4785
1081	59.2843	13.5984	17.9404
1082	65.4843	17.1224	17.0027
1083	41.4731	18.216	15.0252
1084	49.6817	18.3742	15.3562
1085	70.1347	15.2299	14.97
1086	42.6717	10.6656	14.7796
1087	81.0834	13.2065	15.6896
1088	52.6278	14.6102	15.3659
1089	50.2281	21.2605	15.6604
1090	58.7411	16.6096	15.5491
1091	37.9713	16.5748	16.2595
1092	71.4193	22.8958	17.145
1093	92.9161	23.8341	15.4367
1094	46.4519	20.1336	16.7441
1095	51.2044	12.1884	16.562
1096	86.6661	13.7572	15.8592
1097	88.0245	9.24067	15.9493
1098	53.446	15.051	16.3531
1099	54.8904	19.0133	16.0525
1100	44.7913	19.522	15.7796
1101	75.0819	9.27213	16.0468
1102	72.5494	10.7379	15.7703
1103	67.4189	14.5406	16.7224
1104	61.1346	25.7476	14.5391
1105	54.3825	12.1745	16.0512
1106	47.0901	11.9849	16.4538
1107	71.6845	16.5936	16.3856
1108	55.9548	16.3202	15.773
1109	60.9616	14.7958	16.3384
1110	51.3982	12.0662	16.4314
1111	60.9031	20.8126	17.1796
1112	51.3299	14.3306	15.8468
1113	72.1639	18.8982	16.8653
1114	81.3737	21.4741	15.6794
1115	35.7235	16.2068	16.3629
1116	68.545	8.74814	15.2366
1117	41.9033	20.105	16.6633
1118	52.7365	17.0718	14.2159
1119	62.673	19.8385	16.0047
1120	33.0512	11.4216	17.0761
1121	54.3955	15.5686	16.1751
1122	53.5585	9.03762	16.8788
1123	80.8758	15.2515	15.5771
1124	52.7507	13.7593	15.5605
1125	52.4888	17.7723	15.3567
1126	34.512	16.6141	16.3478
1127	29.1644	10.8855	15.1467
1128	68.5717	14.7478	15.8333
1129	83.4769	16.1218	16.2804
1130	51.2292	20.402	16.7394
1131	62.4362	16.3857	16.5995
1132	68.3635	11.7372	16.1232
1133	74.4146	17.3757	16.8637
1134	78.287	13.5088	16.1506
1135	59.3861	20.9041	15.6725
1136	52.0977	11.5047	16.6426
1137	54.3828	9.59825	13.8562
1138	49.3706	15.3762	16.7443
1139	63.8147	13.1468	15.6078
1140	57.1205	18.578	16.2341
1141	72.6908	19.1616	14.8585
1142	61.87	20.4536	16.6683
1143	37.2859	11.8071	14.8944
1144	63.3296	23.2066	16.6166
1145	68.9428	16.4334	16.446
1146	32.3342	13.3927	15.1869
1147	72.1957	25.6374	14.7824
1148	56.7225	20.3412	16.1101
1149	67.8299	14.814	16.0447
1150	46.441	20.8067	15.3526
1151	40.2579	8.01361	15.4018
1152	59.2463	16.2008	16.1074
1153	39.7305	16.3276	16.073
1154	68.2094	16.9441	15.3018
1155	51.8042	20.7995	15.7014
1156	86.4305	10.7278	15.9131
1157	43.0816	25.7473	15.7801
1158	62.4244	16.3006	15.889
1159	77.0778	19.6057	16.1366
1160	80.7648	11.0971	16.1402
1161	59.3252	15.9075	15.8895
1162	72.9017	13.8645	16.1342
1163	42.4076	13.3874	16.1173
1164	53.9373	18.3239	16.1339
1165	67.7059	15.9137	15.8345
1166	68.9294	20.1991	15.1159
1167	53.5004	11.4504	15.7076
1168	63.7073	6.96912	15.8411
1169	64.3527	10.2271	15.6135
1170	74.1141	24.0713	16.1701
1171	68.1666	14.0322	15.1458
1172	63.471	17.8891	15.3596
1173	91.3531	9.94497	15.7064
1174	52.1904	15.0778	16.837
1175	62.3304	17.5827	15.5317
1176	67.7362	15	16.0158
1177	88.1349	6.06455	16.6506
1178	47.3889	19.2007	15.8836
1179	70.3422	22.3537	16.6999
1180	74.0948	16.1027	16.074
1181	67.5011	12.7589	16.4186
1182	48.6771	11.1193	16.4319
1183	58.5041	21.564	15.3271
1184	63.9932	12.8499	16.7902
1185	40.2085	18.2479	16.3769
1186	27.8762	13.3934	15.8365
1187	64.7988	14.3391	16.2753
1188	41.22	16.0011	15.1965
1189	72.086	24.1203	15.236
1190	76.3272	11.933	16.145
1191	52.4301	14.6617	16.7664
1192	62.0238	11.5154	15.5719
1193	69.2341	17.26	15.7455
1194	41.9291	8.57813	16.0037
1195	76.8511	17.4546	15.7891
1196	70.6436	17.4475	15.9024
1197	45.6568	22.5921	14.4463
1198	65.0308	16.1336	15.1276
1199	67.695	9.64588	15.0099
1200	59.9667	19.5915	15.9754
1201	53.6516	14.7433	15.8435
1202	50.2206	13.153	15.8063
1203	78.4146	23.8339	16.8641
1204	70.6958	7.69075	16.2556
1205	42.3266	9.70482	17.5051
1206	81.941	17.1572	15.7706
1207	68.9065	21.4505	16.011
1208	38.3842	17.4489	15.8306
1209	67.5879	17.5126	16.1252
1210	71.8295	16.1896	14.6808
1211	59.7753	14.1463	15.6489
1212	69.4107	15.1742	16.8511
1213	63.5701	9.31696	16.2245
1214	56.5596	23.2023	15.964
1215	69.7572	14.0642	14.877
1216	48.1432	17.2012	16.8007
1217	76.2104	14.3849	15.3449
1218	96.1143	10.3951	17.1463
1219	56.2255	12.9774	15.2121
1220	45.1531	20.0287	16.872
1221	69.5632	18.3819	14.8852
1222	64.8988	15.5723	17.3671
1223	68.3535	10.2702	15.5753
1224	58.6467	16.1126	16.914
1225	103.465	17.0302	16.5606
1226	88.4156	16.6532	17.1744
1227	69.399	21.6746	15.1732
1228	42.1298	18.1042	15.9631
1229	61.9608	16.3659	15.0394
1230	53.3382	12.9607	15.2899
1231	69.4337	13.9196	15.3125
1232	62.3086	16.3747	15.864
1233	78.6406	19.3726	15.9146
1234	69.9043	12.843	16.0213
1235	55.7727	19.4151	15.2279
1236	61.0883	19.148	15.3047
1237	51.9916	13.6953	14.7696
1238	49.2101	19.9952	15.1669
1239	61.5152	13.8074	15.7261
1240	89.6237	19.1691	16.7399
1241	40.5642	13.4175	16.1161
1242	80.5391	19.0022	15.8904
1243	75.4631	13.5821	16.1012
1244	68.9595	14.3007	15.7668
1245	29.2233	15.4566	14.8324
1246	53.6046	17.8595	16.3165
1247	87.7825	20.477	15.6951
1248	67.6667	11.145	17.2467
1249	32.6067	8.47692	15.2336
1250	58.7634	11.058	15.4005
1251	47.4063	19.8277	14.2892
1252	50.3626	17.4784	16.339
1253	56.9948	21.8171	15.2051
1254	69.8295	9.41406	15.4011
1255	48.7247	16.2204	16.4954
1256	67.4331	19.2359	16.8799
1257	84.5305	22.4364	15.1585
1258	55.6032	23.8483	16.3383
1259	51.6662	18.6789	16.6659
1260	51.5676	11.8032	15.8116
1261	65.667	16.4802	16.6433
1262	50.4461	12.9098	16.0546
1263	32.364	12.0487	18.1138
1264	84.2277	19.5921	16.7331
1265	58.735	16.9703	16.6089
1266	70.0075	15.1527	15.3514
1267	49.7394	20.9258	16.9704
1268	45.6428	17.6296	15.0155
1269	84.0897	12.7793	15.7628
1270	99.7545	9.87504	16.0481
1271	41.3198	13.1069	15.64
1272	62.0642	13.5359	16.5203
1273	70.1494	11.1237	16.242
1274	46.7808	14.2813	16.4933
1275	39.8695	13.0461	15.4858
1276	72.9089	13.4504	15.7947
1277	66.1152	16.7015	16.1517
1278	53.6199	18.4729	15.3854
1279	87.9683	19.5654	15.5198
1280	72.191	11.5625	16.3709
1281	105.006	22.6062	16.2129
1282	72.498	20.0188	18.0588
1283	26.6866	13.755	15.691
1284	65.3257	16.3572	16.6738
1285	68.4836	16.6626	15.6361
1286	57.1822	13.9246	16.3416
1287	68.7803	16.2713	16.7936
1288	59.9637	17.5983	15.0594
1289	75.174	6.88026	15.5729
1290	57.583	13.6061	15.9753
1291	72.1022	15.9747	15.2048
1292	69.1603	15.4385	14.7223
1293	67.2137	14.3255	15.5585
1294	88.9686	22.6248	16.6587
1295	48.7708	17.6894	16.366
1296	75.4215	15.7523	16.0357
1297	33.4025	9.29939	15.5279
1298	62.8783	12.7235	15.5044
1299	52.278	21.5523	15.8886
1300	86.801	16.9456	15.9451
1301	44.6408	16.4772	14.8457
1302	50.5941	19.333	15.7202
1303	67.6078	16.2459	15.0443
1304	30.6043	10.563	15.5547
1305	58.7065	14.8902	14.934
1306	43.0244	10.4134	15.4667
1307	42.4105	16.4575	15.8821
1308	57.7174	12.5363	16.74
1309	81.043	17.323	16.1445
1310	76.3527	25.9577	16.3231
1311	63.0604	21.9865	15.7057
1312	66.4715	16.6338	16.3331
1313	60.4682	10.3921	14.8667
1314	62.0892	14.8371	15.8137
1315	77.6646	12.4014	16.0409
1316	57.1207	9.18178	15.9375
1317	63.1259	17.1164	15.2155
1318	54.7757	19.0691	15.6991
1319	75.5771	21.7829	14.5603
1320	36.4898	17.7172	16.9892
1321	56.3342	8.09233	16.7343
1322	47.4178	12.4111	16.2391
1323	68.7395	22.2295	16.7454
1324	68.6424	12.6249	16.3194
1325	46.9162	20.5767	15.8532
1326	100.756	19.3213	14.8113
1327	40.8362	15.9078	15.0856
1328	57.2756	11.55	15.4616
1329	45.2661	17.5492	16.1798
1330	60.5998	6.16219	15.3752
1331	93.8633	26.4447	14.318
1332	67.9252	18.4483	17.0646
1333	72.4764	22.1957	16.4201
1334	68.5776	13.7601	14.4243
1335	42.5879	19.1882	16.0692
1336	76.2876	13.7125	16.1137
1337	100.971	11.4813	16.6562
1338	64.3826	21.1634	15.6345
1339	86.2711	17.2936	17.1551
1340	68.0895	19.2316	14.8846
1341	80.9711	13.3266	16.4913
1342	62.9639	13.9724	16.0463
1343	42.7242	12.6327	15.3374
1344	48.9221	17.3242	16.0313
1345	96.6753	10.0518	16.6462
1346	71.7912	15.0069	14.6734
1347	51.2539	21.9149	16.367
1348	26.8902	10.261	15.7162
1349	59.2843	15.6199	17.3172
1350	48.2921	11.2946	15.0969
1351	88.1002	19.6684	14.8318
1352	67.2701	6.28111	14.9161
1353	97.0322	21.6349	16.0268
1354	70.8013	15.6542	15.682
1355	49.3646	16.6812	15.906
1356	74.8852	32.6145	16.1047
1357	76.7142	23.0618	15.8303
1358	70.5879	12.0315	16.8606
1359	61.2476	10.8397	15.9613
1360	55.6029	7.75495	17.0541
1361	48.5935	14.0103	15.0749
1362	70.0432	7.955	15.5587
1363	67.9922	19.41	16.93
1364	46.8725	20.8017	17.5406
1365	45.4366	11.8209	16.4336
1366	76.1788	14.0911	16.4202
1367	84.138	10.7695	15.4822
1368	63.4575	8.52934	15.5776
1369	40.7521	11.0992	15.5727
1370	61.9591	18.9151	16.5441
1371	76.4194	6.7319	16.0911
1372	61.2983	13.3305	14.7337
1373	51.4637	14.0892	15.4662
1374	69.7745	21.3587	15.1752
1375	48.7779	9.20553	15.6388
1376	46.217	10.29	16.607
1377	40.0745	12.9414	15.2495
1378	74.9074	20.7031	15.2975
1379	91.8803	22.3508	15.3628
1380	60.9546	19.9511	15.8093
1381	84.5863	21.7805	15.8385
1382	43.8374	12.0414	15.0997
1383	67.9444	10.6895	16.5232
1384	99.2694	16.8795	15.0237
1385	67.0412	13.6506	15.2473
1386	72.2528	20.3142	16.2747
1387	58.4537	12.9646	16.3207
1388	93.2864	11.7969	15.8017
1389	38.2321	15.3283	15.0378
1390	66.7655	21.4573	15.1892
1391	78.523	12.219	14.617
1392	48.652	15.3013	15.4576
1393	57.6327	18.6705	15.3029
1394	56.73	12.8801	16.5428
1395	57.696	21.0334	16.4614
1396	70.2053	18.4927	14.9686
1397	77.6587	15.789	16.0026
1398	46.1309	12.1631	16.4827
1399	72.4646	19.9788	16.604
1400	65.688	16.8645	15.9228
1401	51.996	21.1926	14.2038
1402	79.1928	19.9354	16.5497
1403	86.1812	12.9257	15.4428
1404	67.2953	10.3374	16.6424
1405	58.9437	19.0083	14.6469
1406	58.9496	18.3231	16.8355
1407	40.5475	12.0553	16.6054
1408	65.7751	9.54071	14.9161
1409	90.7171	11.0453	16.7369
1410	73.8091	9.81506	15.7234
1411	54.7856	20.3228	16.048
1412	45.4357	18.0481	15.094
1413	85.4276	17.8101	16.4353
1414	57.7495	22.5735	15.6619
1415	74.5558	12.4858	17.5627
1416	83.4156	14.3625	14.9944
1417	66.9537	14.6421	16.3293
1418	79.0366	15.1695	14.412
1419	87.5473	13.1533	14.8699
1420	66.3618	23.0777	14.8743
1421	63.5064	21.548	15.4411
1422	83.5744	22.0479	16.0102
1423	53.9376	20.309	14.0713
1424	80.8775	20.7523	18.0799
1425	63.4225	15.2732	16.1454
1426	56.6792	16.0068	15.4124
1427	55.1167	10.9339	16.2572
1428	75.2218	24.7493	16.5844
1429	56.6315	19.0446	14.4378
1430	35.8595	18.6996	16.3372
1431	56.6575	15.9408	16.7126
1432	41.3124	12.8263	17.8024
1433	59.3838	16.5966	15.5348
1434	72.5457	18.209	15.7828
1435	43.9958	12.9664	15.5045
1436	59.0122	7.89333	14.8209
1437	72.2859	20.3573	16.716
1438	77.8598	16.7005	15.4631
1439	80.3125	13.1073	16.8366
1440	49.1998	17.802	14.9806
1441	94.1211	17.0693	16.8051
1442	67.8902	9.42681	15.3937
1443	55.4556	14.0514	16.4544
1444	34.1517	17.4467	16.3079
1445	56.2105	15.8673	15.9993
1446	53.2842	20.5483	15.7757
1447	35.5291	13.1857	16.3058
1448	75.0731	15.3341	16.4824
1449	52.9228	8.04068	16.5596
1450	75.0371	14.7041	15.8758
1451	58.2696	13.5631	16.9401
1452	31.3458	22.9675	16.1141
1453	77.734	10.3813	15.549
1454	74.2349	17.4683	17.1141
1455	53.3296	17.3677	16.402
1456	80.8305	9.89721	16.4527
1457	48.1573	12.0658	15.0713
1458	76.4759	20.7916	14.8698
1459	53.3819	10.8539	15.8838
1460	68.532	14.5377	16.0513
1461	55.9797	17.8764	16.0835
1462	63.135	9.20286	14.5625
1463	60.2338	14.2322	15.7373
1464	74.6664	10.5983	16.7923
1465	73.1877	14.5698	15.9661
1466	46.3329	16.3759	15.1007
1467	47.465	19.6569	14.7636
1468	74.4663	9.25469	17.7259
1469	55.2629	17.0002	16.2239
1470	50.5795	17.6377	16.0322
1471	58.5351	13.1375	16.5475
1472	71.6005	15.1574	17.0892
1473	102.399	7.36714	15.4574
1474	65.7295	20.1942	15.175
1475	38.6368	19.6474	16.1628
1476	77.7962	9.42653	17.5071
1477	79.0874	11.9446	15.0994
1478	64.9281	22.3265	16.0157
1479	68.6305	15.0766	15.3255
1480	52.7025	19.4425	15.4783
1481	55.5011	10.8426	16.2827
1482	64.6517	18.4536	15.9819
1483	52.0797	17.4772	15.2296
1484	58.245	10.2843	17.2982
1485	43.4307	10.9214	15.8199
1486	70.8034	19.5067	16.2
1487	72.0408	17.8924	16.2265
1488	98.8659	11.7473	15.4526
1489	54.0856	22.9236	16.303
1490	79.3713	15.3798	14.7407
1491	98.8654	14.2194	15.0376
1492	75.1673	23.5891	15.0238
1493	46.1376	6.31386	15.6796
1494	78.2317	11.7241	16.169
1495	74.0724	9.85724	15.6216
1496	67.3811	16.0429	16.4708
1497	74.0685	12.6573	15.5047
1498	91.5664	6.76694	15.6676
1499	67.3545	6.27716	16.6066
1500	53.9016	23.2513	16.8028
1501	44.6283	19.1987	15.9305
1502	69.2244	15.2662	17.124
1503	63.2208	11.7276	14.7491
1504	27.0573	17.7406	15.9889
1505	36.3631	8.30581	16.2309
1506	61.6339	16.4409	16.0762
1507	42.678	10.2798	14.6658
1508	62.2909	15.2418	17.1674
1509	52.2958	19.1621	17.3573
1510	85.4933	10.7617	15.2369
1511	45.2919	13.2414	15.6632
1512	68.5753	14.2046	17.0101
1513	99.1686	16.9255	15.9651
1514	74.9701	16.5687	15.8354
1515	52.1919	19.1747	14.9881
1516	70.082	13.688	16.176
1517	76.2127	22.0999	17.0932
1518	54.1797	14.9159	15.3084
1519	78.131	15.5016	16.178
1520	79.7801	13.178	15.1855
1521	73.6154	11.8742	15.6562
1522	85.7018	18.8229	16.3737
1523	65.1738	7.76984	15.5602
1524	63.8718	18.4515	14.4543
1525	60.3567	6.41533	16.7208
1526	57.5889	11.5439	15.9505
1527	72.0257	19.2055	15.5099
1528	74.4306	14.0508	17.3919
1529	76.9725	10.7083	16.4444
1530	67.9705	13.6343	15.2719
1531	43.5487	9.45337	16.1641
1532	73.7683	11.0301	14.8525
1533	76.4255	26.1616	15.9139
1534	53.8728	14.1773	16.1913
1535	74.4171	21.6519	16.2382
1536	89.118	16.0189	17.9534
1537	69.3313	13.2358	16.0117
1538	89.4064	22.3829	15.8726
1539	63.2839	16.2797	16.1543
1540	38.1392	21.0445	15.9048
1541	50.2697	8.48326	16.237
1542	47.5286	10.7352	16.2702
1543	45.2849	19.2219	15.863
1544	69.9102	12.7941	15.5799
1545	62.5403	17.37	15.648
1546	59.7152	8.72736	15.9889
1547	59.5368	7.77214	14.5887
1548	75.0171	14.9183	15.2522
1549	65.2295	13.1652	16.2212
1550	65.9059	12.6313	16.5962
1551	77.7834	8.12671	15.5716
1552	70.5009	7.95351	14.7558
1553	69.032	18.3611	14.8132
1554	36.6555	17.3126	15.1829
1555	29.5255	16.6079	15.3116
1556	53.8896	10.4968	16.3993
1557	63.2404	9.57292	16.5587
1558	38.8237	17.1741	16.5596
1559	30.7057	16.0208	15.3313
1560	60.6467	20.6365	16.2556
1561	39.8228	10.8661	15.5282
1562	53.4444	15.2077	15.82
1563	57.1727	11.5466	16.2447
1564	67.8155	15.8695	17.3209
1565	47.7122	17.6084	17.1007
1566	65.5119	19.9179	15.8768
1567	70.8256	19.1158	14.681
1568	78.8733	18.4436	16.2227
1569	80.4119	10.1675	13.5063
1570	70.2241	13.9753	15.4861
1571	52.0247	16.4528	16.6248
1572	87.5287	14.009	15.998
1573	63.9725	22.1786	14.9635
1574	62.2129	12.9228	15.1828
1575	61.6493	9.53264	15.8492
1576	45.6979	22.6196	16.4363
1577	82.4487	19.5955	16.0511
1578	59.4688	10.5586	15.6627
1579	52.9414	11.5031	15.8794
1580	106.278	17.1965	17.2378
1581	45.8224	10.1911	17.3748
1582	37.8418	17.565	15.6919
1583	46.7357	15.7843	15.5634
1584	71.8638	13.9399	16.1645
1585	55.0083	17.7381	16.3744
1586	46.4233	20.9723	16.7809
1587	39.9532	14.9647	15.597
1588	31.735	11.7658	16.2784
1589	46.8366	21.8457	15.992
1590	88.9863	18.3484	16.2384
1591	59.2343	21.1311	15.3475
1592	60.5328	12.6466	14.4943
1593	57.6161	13.4679	16.6789
1594	49.6654	6.08904	14.4786
1595	59.6162	14.7056	16.2572
1596	69.6371	17.6383	15.7283
1597	44.1512	11.9608	16.152
1598	50.6329	16.8587	14.7959
1599	67.646	17.4484	15.5598
1600	60.4214	21.9998	16.0725
1601	64.8363	18.0367	15.9028
1602	56.1969	19.5025	16.0197
1603	68.4881	19.9426	16.7803
1604	55.692	14.0553	16.2015
1605	83.7644	22.4687	17.3148
1606	51.0898	7.66632	16.8179
1607	54.2065	17.6116	16.0553
1608	53.4919	8.84856	16.1612
1609	59.4864	16.3458	17.5632
1610	49.6972	19.6637	15.4075
1611	86.8958	15.7699	16.7659
1612	70.8206	19.5992	15.6488
1613	44.9661	15.6917	16.4168
1614	80.4032	19.985	15.3097
1615	73.1431	17.4826	15.5075
1616	65.6465	14.4028	16.1024
1617	47.14	21.7195	16.4802
1618	79.0273	15.0872	15.6625
1619	85.8872	24.3544	16.286
1620	45.2822	12.0681	15.6624
1621	85.098	14.2695	15.122
1622	41.229	13.9843	15.704
1623	56.6133	18.6939	16.0993
1624	59.461	7.46908	16.0652
1625	33.459	15.6722	14.8902
1626	43.7974	15.2167	15.3199
1627	51.0887	20.0237	17.1495
1628	57.1307	6.84992	16.8513
1629	32.208	15.9497	16.4213
1630	68.0465	9.63774	15.9887
1631	56.1819	23.4981	17.1719
1632	27.2671	9.29914	16.5484
1633	76.3927	14.3187	15.5051
1634	57.756	14.5656	16.073
1635	32.7342	14.0944	15.5315
1636	81.4838	13.9976	14.5813
1637	68.7548	22.1113	15.0866
1638	54.4521	8.9965	14.6481
1639	40.1146	17.8329	16.1329
1640	85.6435	9.18904	15.0488
1641	58.0643	13.9605	15.9302
1642	80.9485	11.4004	15.5454
1643	50.5901	29.6959	14.6501
1644	54.2751	16.279	15.5004
1645	78.1539	8.40723	15.5186
1646	66.0804	14.6208	14.5373
1647	65.8177	12.2983	15.3429
1648	79.2758	15.8789	16.0085
1649	54.3917	15.4069	14.6256
1650	42.3369	15.5194	16.3786
1651	57.7779	18.9998	15.8699
1652	49.8361	17.3919	14.8041
1653	80.2102	14.9935	15.3396
1654	38.7581	19.7084	16.9557
1655	46.6272	13.05	15.2924
1656	55.2496	18.7316	15.0334
1657	64.7094	21.0412	16.1609
1658	56.715	11.9185	17.1591
1659	80.6204	16.2021	15.6389
1660	80.6154	10.6086	16.9474
1661	41.2506	13.5298	17.7724
1662	33.6705	21.0718	16.5539
1663	57.783	13.6374	15.9849
1664	61.3326	15.4961	16.8742
1665	73.6901	12.3822	15.4778
1666	73.5256	16.7227	16.3814
1667	45.062	12.25	15.2966
1668	46.5825	11.1325	15.8239
1669	40.726	23.8525	16.3164
1670	59.7423	13.9879	16.1728
1671	65.669	11.6093	15.2944
1672	52.837	11.8332	16.8308
1673	83.4573	7.08932	16.6577
1674	76.5913	19.2634	16.1464
1675	65.382	9.73441	16.0283
1676	71.0651	12.0084	16.5898
1677	97.7635	24.5034	15.4463
1678	61.419	16.3246	16.0405
1679	70.1392	18.1143	16.3398
1680	38.1538	15.2043	16.7972
1681	41.4104	14.0729	15.8219
1682	64.529	11.5288	16.9385
1683	75.5111	19.5474	17.8408
1684	54.1626	12.452	16.1627
1685	53.0606	10.5258	16.6459
1686	45.7733	23.5273	16.2688
1687	91.9074	17.2057	15.5648
1688	64.6194	15.4015	16.3932
1689	51.869	8.92622	15.2267
1690	57.2599	11.8998	16.6574
1691	62.5887	16.5034	15.4902
1692	37.7504	16.7122	15.6747
1693	46.5692	17.6701	15.3056
1694	63.5646	19.2353	16.4557
1695	62.0466	8.35229	15.4851
1696	62.6122	16.8497	16.9866
1697	64.7684	11.0793	15.8094
1698	60.744	19.2757	15.0023
1699	46.5206	18.3069	14.7212
1700	69.735	15.6151	16.6945
1701	70.4879	19.1651	15.5927
1702	53.5161	16.1846	16.5583
1703	83.7494	20.8465	15.6797
1704	40.6944	20.0028	17.1205
1705	87.1448	13.9727	16.0769
1706	54.6718	20.8672	15.6746
1707	52.5051	10.3256	15.0462
1708	44.8497	16.5926	16.2453
1709	61.4882	9.59222	16.5558
1710	47.8939	15.8313	15.8952
1711	63.2776	13.5435	15.7185
1712	57.6404	13.048	16.9246
1713	62.4646	16.7359	15.5601
1714	53.6081	22.4118	16.4193
1715	35.1403	18.6117	15.0158
1716	42.4227	14.021	16.5574
1717	47.8895	11.7986	15.5893
1718	63.0085	12.2092	16.3687
1719	50.3423	15.3357	16.2049
1720	33.423	18.6778	14.1149
1721	53.6521	15.6352	15.4099
1722	39.5557	14.8955	15.4901
1723	73.3752	10.3375	16.9089
1724	59.4908	18.6028	14.5237
1725	93.7267	10.8973	15.5125
1726	71.1038	24.8438	15.0065
1727	71.2279	18.2366	15.8388
1728	61.7476	10.425	17.5686
1729	62.7923	21.7178	15.6823
1730	44.5517	14.3444	15.9117
1731	57.1091	21.0496	15.1035
1732	71.3139	15.8314	15.8071
1733	90.3797	22.673	15.2835
1734	71.3315	13.6316	15.7922
1735	35.8293	12.7882	16.2389
1736	75.9886	25.0805	16.2593
1737	45.0451	13.8862	16.0991
1738	54.4512	19.4852	16.7343
1739	35.9878	12.0157	16.3599
1740	70.1113	20.9677	14.3086
1741	78.6204	11.7201	16.1193
1742	66.2344	12.2203	15.3614
1743	68.6481	10.5896	16.768
1744	62.1027	15.0887	16.0341
1745	46.8779	13.4125	15.2498
1746	51.8108	15.4476	15.6998
1747	54.5388	20.6885	16.8535
1748	97.208	13.9647	16.4774
1749	63.507	6.14154	15.8021
1750	45.3261	17.1712	15.5512
1751	47.8984	9.4589	15.9322
1752	57.7179	6.11815	15.5564
1753	33.8812	10.175	16.1762
1754	63.1218	13.017	17.0267
1755	80.4723	8.11621	15.8074
1756	68.8976	9.76967	15.3384
1757	67.0869	11.3809	16.2618
1758	61.402	21.7788	15.5043
1759	74.361	6.51439	15.1942
1760	54.8843	13.5707	16.0055
1761	55.3081	17.0409	15.4243
1762	74.1725	19.556	15.2479
1763	42.5357	17.8635	16.6732
1764	35.4414	19.112	15.4399
1765	74.2033	14.7795	15.6893
1766	62.0982	24.2217	15.4987
1767	73.6682	16.999	15.2763
1768	52.6519	20.4188	15.6009
1769	57.0161	19.2559	15.7505
1770	78.5094	15.2579	14.9484
1771	47.4252	16.3644	15.7469
1772	49.0271	9.14201	15.7043
1773	75.9737	16.7518	16.0895
1774	48.7287	13.9911	15.0298
1775	74.8873	16.4037	16.5717
1776	64.7893	10.8065	15.9612
1777	43.0148	11.7518	16.6913
1778	35.1991	20.639	15.6983
1779	56.2952	13.4753	16.4037
1780	92.033	12.0421	15.8263
1781	68.6959	13.833	16.6421
1782	63.2489	19.0897	15.2879
1783	34.5768	18.9822	16.5708
1784	51.756	15.1873	16.6954
1785	79.1526	15.1982	15.3739
1786	77.7938	10.967	14.8501
1787	45.1625	25.4931	15.3756
1788	62.529	20.6693	17.1834
1789	56.7566	9.85978	15.5603
1790	53.6975	12.2455	13.9871
1791	69.5527	12.6588	16.0607
1792	72.0357	12.6951	15.7707
1793	69.9579	18.0424	16.3483
1794	52.1571	16.5978	16.9679
1795	71.6891	15.3539	16.1578
1796	49.0071	17.3012	15.9073
1797	64.3346	16.2402	15.8832
1798	73.4582	16.4169	15.8406
1799	53.9477	18.2472	16.0736
1800	37.865	18.062	15.4698
1801	41.7213	8.13373	15.6997
1802	67.0304	24.8913	17.198
1803	60.9492	10.1	15.8834
1804	79.5429	17.1259	15.6876
1805	82.5907	11.0316	15.8359
1806	106.789	24.0898	16.0713
1807	62.1567	23.9255	16.7661
1808	68.079	10.9605	16.5675
1809	56.4825	11.0657	16.5252
1810	72.047	12.2671	17.5676
1811	62.8055	9.61882	16.3041
1812	50.4208	20.3768	14.4138
1813	66.3523	17.1998	16.057
1814	60.7325	14.739	16.7222
1815	51.7911	15.1587	15.9926
1816	67.2615	17.7612	15.5409
1817	42.4325	17.9876	15.7612
1818	66.0363	19.9096	14.8071
1819	45.6547	29.557	16.4106
1820	74.2959	15.0954	14.8909
1821	59.9495	21.0577	16.2022
1822	50.8421	19.4126	16.0535
1823	75.2972	13.4721	15.7718
1824	63.2158	15.4451	16.4574
1825	78.0529	12.3922	16.8894
1826	53.009	8.16652	15.71
1827	54.7758	14.5916	16.2909
1828	80.5139	21.0466	15.2804
1829	58.1045	16.7299	15.4415
1830	67.9626	14.6339	16.622
1831	49.4815	23.2541	15.277
1832	72.0939	21.2486	14.8881
1833	75.5103	10.5438	15.6986
1834	77.1424	5.9606	15.7654
1835	101.71	19.9226	17.37
1836	43.1027	24.3914	14.3988
1837	68.3236	9.49336	16.4312
1838	57.1827	10.9893	16.5306
1839	56.6613	14.9514	15.8982
1840	68.3755	13.1679	15.8289
1841	61.8499	16.7444	16.6164
1842	45.5387	17.8983	15.7925
1843	59.2145	6.83218	15.2752
1844	89.3111	7.22177	15.3965
1845	84.3917	20.6179	15.7018
1846	42.9088	16.352	15.5049
1847	48.0973	15.7817	15.2138
1848	58.7464	7.54259	15.9858
1849	77.9692	14.3717	16.1363
1850	71.9733	16.8655	15.5122
1851	63.232	12.0381	16.2724
1852	75.4728	11.6548	17.2996
1853	66.2023	21.4288	16.5132
1854	66.6004	15.1767	15.0847
1855	33.7372	11.3957	15.1582
1856	51.3266	10.8098	16.0555
1857	38.8234	13.1604	17.2548
1858	74.2348	18.9097	16.2466
1859	76.8788	14.0183	16.4232
1860	73.634	16.0793	15.8809
1861	77.7969	13.8066	16.1156
1862	44.9934	14.0685	15.7044
1863	76.9775	17.1243	16.8652
1864	51.5386	24.4739	14.8855
1865	42.7683	28.6081	16.6696
1866	68.2294	19.032	16.0255
1867	65.6889	10.136	16.9027
1868	34.1833	18.4229	15.5479
1869	78.2302	19.2458	14.9768
1870	68.9616	15.6614	16.6879
1871	36.3475	16.4256	16.6025
1872	46.9286	13.8239	14.6951
1873	67.592	10.3913	16.0423
1874	63.5453	19.0786	14.8816
1875	94.8892	18.8117	15.4043
1876	68.9995	13.2453	16.2536
1877	30.5425	22.8061	14.6573
1878	44.4289	18.2628	16.5489
1879	83.7305	14.5076	16.2907
1880	87.5971	15.5497	17.1296
1881	59.4361	18.3047	15.3528
1882	72.8885	10.9818	15.8759
1883	66.9811	17.3828	15.7631
1884	40.2009	18.3471	16.7962
1885	62.0453	17.6742	16.3043
1886	40.6397	16.526	16.0639
1887	96.0495	15.2463	15.304
1888	74.3216	13.2457	13.8764
1889	55.7585	12.7625	15.3817
1890	51.7957	14.3558	16.6395
1891	84.4918	13.6563	15.5237
1892	45.2808	21.5957	16.3009
1893	60.3245	6.94049	15.8089
1894	86.4448	14.2862	16.5208
1895	92.8889	10.9451	16.2712
1896	50.3389	17.8126	17.3383
1897	65.9208	16.6975	16.1116
1898	66.9425	15.3889	16.176
1899	73.6723	14.7783	15.9693
1900	59.1011	17.2032	15.4114
1901	37.2501	19.4387	16.1224
1902	69.8791	12.3251	17.4253
1903	68.7255	24.4822	15.5816
1904	46.7851	17.9608	15.19
1905	49.2875	12.1995	16.1752
1906	58.1543	14.2133	15.5274
1907	42.1178	7.05296	16.3453
1908	40.4964	15.4426	17.4703
1909	33.0658	21.0857	15.3015
1910	79.4613	14.5412	17.5432
1911	65.0547	21.7599	17.2246
1912	62.2256	16.6495	15.498
1913	87.6918	14.0464	17.2653
1914	73.5134	23.4858	15.4283
1915	70.0272	15.0732	15.8176
1916	56.639	17.3489	16.8608
1917	63.5706	13.9207	15.8379
1918	27.791	14.0514	15.4591
1919	80.0526	15.7805	14.4265
1920	43.5848	10.9491	15.2665
1921	64.4067	8.17564	15.3875
1922	61.9872	6.55155	16.4029
1923	53.8125	24.4431	16.6509
1924	33.7209	14.583	14.8353
1925	72.359	20.9675	15.8741
1926	56.2175	14.8867	15.3972
1927	54.1563	10.9471	15.7767
1928	65.0892	15.7154	15.4927
1929	52.8351	13.4462	16.0566
1930	65.4435	17.1645	16.341
1931	46.5663	15.5698	16.1926
1932	56.7592	11.5579	16.2887
1933	70.5263	14.787	16.2942
1934	64.9892	23.1773	15.3476
1935	30.9741	16.9644	14.9631
1936	55.0852	9.87872	15.4897
1937	67.299	12.4551	15.199
1938	44.3838	8.81345	15.314
1939	75.2825	20.4999	15.8277
1940	74.5032	7.48981	16.0166
1941	56.0662	10.9463	16.7121
1942	66.0273	20.9856	17.0722
1943	84.7945	14.5319	16.6859
1944	50.4724	15.2341	15.8998
1945	66.6495	23.4638	15.9689
1946	37.2033	19.3848	14.9534
1947	59.0613	15.672	15.3657
1948	75.2954	15.3702	15.4872
1949	62.4294	11.5428	16.5237
1950	46.9216	15.3311	16.2108
1951	70.6863	16.9654	16.9615
1952	59.6913	10.2248	15.3524
1953	80.3664	14.5248	15.0899
1954	84.2608	19.7613	16.7343
1955	45.0387	20.3396	15.4064
1956	40.6449	21.8246	16.0786
1957	72.226	13.7751	15.5967
1958	46.2542	16.2647	15.8247
1959	66.4311	17.4703	15.7771
1960	46.0928	16.9702	15.8976
1961	71.2399	8.75643	17.0344
1962	82.6682	18.0787	16.7307
1963	66.1819	19.6369	15.5517
1964	49.6157	6.46128	15.4168
1965	51.1304	18.182	16.9082
1966	94.7601	12.161	16.6147
1967	83.0883	11.312	15.5693
1968	68.651	9.81175	16.1668
1969	29.2765	16.0682	17.0902
1970	38.8708	20.6912	15.6902
1971	69.861	15.9371	15.85
1972	52.4925	25.846	16.8176
1973	36.0847	19.9776	15.337
1974	67.0903	15.5468	16.6625
1975	61.6688	24.5426	17.136
1976	77.0411	14.7952	16.6574
1977	45.5717	21.0261	15.6344
1978	34.04	18.9209	16.3949
1979	40.8191	6.28905	15.8743
1980	85.3124	18.717	16.5542
1981	49.0733	16.5727	15.6273
1982	61.164	19.8834	14.7204
1983	59.617	20.2287	14.9053
1984	67.3731	18.5818	15.0068
1985	48.569	17.0406	17.2071
1986	53.0362	13.6168	15.8308
1987	47.165	15.6686	15.4176
1988	57.877	13.3507	15.8481
1989	70.1112	12.5662	16.0547
1990	66.793	15.771	15.3333
1991	71.9199	10.8665	15.3978
1992	57.9599	10.3737	15.5374
1993	37.1713	12.3681	15.0542
1994	49.1038	18.8169	15.0134
1995	87.4989	17.6939	14.7183
1996	66.1739	15.3108	15.3148
1997	51.1379	17.4615	16.0008
1998	68.1159	9.52484	13.5737
1999	57.5893	17.4885	16.1471
[truncated: 8,001 more rows]

## Sheet: Simulation Output Values 1
Sim #	ADD	ADD_carc	CR	HQ
1	1.63816e-09	3.56357e-10	2.96964e-11	0.000109211
2	2.87317e-09	6.25014e-10	5.20845e-11	0.000191545
3	4.65162e-09	1.01189e-09	8.43238e-11	0.000310108
4	3.24676e-09	7.06282e-10	5.88568e-11	0.000216451
5	3.16888e-09	6.8934e-10	5.7445e-11	0.000211259
6	3.12419e-09	6.79619e-10	5.66349e-11	0.00020828
7	4.5699e-09	9.94111e-10	8.28426e-11	0.00030466
8	3.02905e-09	6.58922e-10	5.49102e-11	0.000201937
9	2.83501e-09	6.16712e-10	5.13926e-11	0.000189001
10	1.14415e-09	2.48891e-10	2.07409e-11	7.62764e-05
11	2.3154e-09	5.03678e-10	4.19732e-11	0.00015436
12	2.80558e-09	6.10309e-10	5.08591e-11	0.000187038
13	2.05068e-09	4.46093e-10	3.71744e-11	0.000136712
14	4.38231e-09	9.53302e-10	7.94418e-11	0.000292154
15	3.63378e-09	7.90471e-10	6.58725e-11	0.000242252
16	1.85921e-09	4.04442e-10	3.37035e-11	0.000123947
17	3.56164e-09	7.74778e-10	6.45649e-11	0.000237443
18	5.72762e-09	1.24595e-09	1.0383e-10	0.000381842
19	2.90785e-09	6.32558e-10	5.27131e-11	0.000193857
20	5.3525e-09	1.16435e-09	9.70294e-11	0.000356834
21	4.75408e-09	1.03418e-09	8.61813e-11	0.000316939
22	2.99628e-09	6.51794e-10	5.43162e-11	0.000199752
23	2.43996e-09	5.30775e-10	4.42312e-11	0.000162664
24	3.5506e-09	7.72376e-10	6.43647e-11	0.000236706
25	4.03575e-09	8.77914e-10	7.31595e-11	0.00026905
26	2.95556e-09	6.42934e-10	5.35779e-11	0.000197037
27	2.57414e-09	5.59965e-10	4.66637e-11	0.00017161
28	2.16165e-09	4.70233e-10	3.91861e-11	0.00014411
29	6.09021e-09	1.32483e-09	1.10402e-10	0.000406014
30	2.99175e-09	6.50808e-10	5.4234e-11	0.00019945
31	2.20229e-09	4.79074e-10	3.99228e-11	0.000146819
32	2.74523e-09	5.97182e-10	4.97651e-11	0.000183015
33	1.28099e-09	2.78658e-10	2.32215e-11	8.53991e-05
34	2.70686e-09	5.88836e-10	4.90696e-11	0.000180458
35	3.10664e-09	6.758e-10	5.63166e-11	0.000207109
36	3.25318e-09	7.07679e-10	5.89732e-11	0.000216879
37	2.42058e-09	5.26558e-10	4.38799e-11	0.000161372
38	4.26842e-09	9.28528e-10	7.73773e-11	0.000284561
39	1.15079e-09	2.50335e-10	2.08613e-11	7.67191e-05
40	6.79314e-09	1.47774e-09	1.23145e-10	0.000452876
41	2.02056e-09	4.3954e-10	3.66283e-11	0.000134704
42	5.14301e-09	1.11878e-09	9.32318e-11	0.000342868
43	2.57221e-09	5.59544e-10	4.66287e-11	0.000171481
44	2.98685e-09	6.49741e-10	5.41451e-11	0.000199123
45	2.55035e-09	5.54789e-10	4.62325e-11	0.000170024
46	3.04012e-09	6.6133e-10	5.51108e-11	0.000202675
47	4.33221e-09	9.42404e-10	7.85337e-11	0.000288814
48	1.92347e-09	4.18421e-10	3.48684e-11	0.000128231
49	6.55198e-09	1.42528e-09	1.18773e-10	0.000436799
50	5.83926e-09	1.27024e-09	1.05853e-10	0.000389284
51	8.33581e-09	1.81332e-09	1.5111e-10	0.000555721
52	9.85254e-10	2.14326e-10	1.78605e-11	6.56836e-05
53	4.03477e-09	8.77701e-10	7.31418e-11	0.000268985
54	2.29997e-09	5.00322e-10	4.16935e-11	0.000153331
55	2.68046e-09	5.83092e-10	4.8591e-11	0.000178697
56	2.47225e-09	5.37798e-10	4.48165e-11	0.000164816
57	1.19043e-09	2.5896e-10	2.158e-11	7.93622e-05
58	2.70659e-09	5.88777e-10	4.90647e-11	0.00018044
59	7.85978e-09	1.70977e-09	1.42481e-10	0.000523985
60	3.66794e-09	7.97903e-10	6.64919e-11	0.000244529
61	1.62953e-09	3.54479e-10	2.95399e-11	0.000108636
62	2.67196e-09	5.81242e-10	4.84368e-11	0.00017813
63	2.43207e-09	5.29059e-10	4.40883e-11	0.000162138
64	1.62886e-09	3.54334e-10	2.95278e-11	0.000108591
65	8.98097e-10	1.95367e-10	1.62806e-11	5.98731e-05
66	3.13992e-09	6.83039e-10	5.69199e-11	0.000209328
67	3.21638e-09	6.99672e-10	5.8306e-11	0.000214425
68	3.15796e-09	6.86965e-10	5.72471e-11	0.000210531
69	2.79301e-09	6.07575e-10	5.06312e-11	0.0001862
70	5.75474e-09	1.25185e-09	1.04321e-10	0.000383649
71	3.92123e-09	8.53002e-10	7.10835e-11	0.000261415
72	3.42055e-09	7.44087e-10	6.20072e-11	0.000228037
73	2.87921e-09	6.26327e-10	5.21939e-11	0.000191947
74	2.01693e-09	4.38752e-10	3.65626e-11	0.000134462
75	3.48426e-09	7.57946e-10	6.31622e-11	0.000232284
76	2.56048e-09	5.56992e-10	4.6416e-11	0.000170699
77	2.59907e-09	5.65386e-10	4.71155e-11	0.000173271
78	2.30021e-09	5.00376e-10	4.1698e-11	0.000153348
79	3.77109e-09	8.20342e-10	6.83618e-11	0.000251406
80	2.61306e-09	5.6843e-10	4.73692e-11	0.000174204
81	1.52959e-09	3.32739e-10	2.77282e-11	0.000101973
82	3.9479e-09	8.58803e-10	7.15669e-11	0.000263193
83	3.20297e-09	6.96756e-10	5.8063e-11	0.000213532
84	3.58541e-09	7.79948e-10	6.49957e-11	0.000239027
85	3.9215e-09	8.5306e-10	7.10883e-11	0.000261433
86	2.17615e-09	4.73388e-10	3.9449e-11	0.000145077
87	3.10705e-09	6.75889e-10	5.63241e-11	0.000207136
88	3.52716e-09	7.67279e-10	6.39399e-11	0.000235144
89	4.36264e-09	9.49023e-10	7.90852e-11	0.000290842
90	1.26591e-09	2.75379e-10	2.29482e-11	8.4394e-05
91	2.7673e-09	6.01983e-10	5.01653e-11	0.000184487
92	4.21286e-09	9.1644e-10	7.637e-11	0.000280857
93	3.43322e-09	7.46842e-10	6.22368e-11	0.000228881
94	3.3367e-09	7.25846e-10	6.04872e-11	0.000222447
95	3.45273e-09	7.51088e-10	6.25906e-11	0.000230182
96	2.80507e-09	6.10198e-10	5.08498e-11	0.000187004
97	3.33768e-09	7.26059e-10	6.05049e-11	0.000222512
98	4.48622e-09	9.75906e-10	8.13255e-11	0.000299081
99	4.30153e-09	9.3573e-10	7.79775e-11	0.000286769
100	3.75207e-09	8.16203e-10	6.80169e-11	0.000250138
101	4.20394e-09	9.145e-10	7.62084e-11	0.000280262
102	3.91331e-09	8.51278e-10	7.09398e-11	0.000260887
103	1.58763e-09	3.45365e-10	2.87804e-11	0.000105842
104	3.63102e-09	7.89872e-10	6.58227e-11	0.000242068
105	2.35828e-09	5.13006e-10	4.27505e-11	0.000157219
106	3.34774e-09	7.28248e-10	6.06873e-11	0.000223183
107	1.26766e-09	2.75759e-10	2.29799e-11	8.45105e-05
108	2.58218e-09	5.61714e-10	4.68095e-11	0.000172146
109	3.70702e-09	8.06403e-10	6.72003e-11	0.000247134
110	3.03833e-09	6.60941e-10	5.50784e-11	0.000202555
111	3.2528e-09	7.07595e-10	5.89663e-11	0.000216853
112	2.57583e-09	5.60331e-10	4.66942e-11	0.000171722
113	1.2912e-09	2.8088e-10	2.34067e-11	8.60799e-05
114	4.69799e-09	1.02197e-09	8.51644e-11	0.000313199
115	4.70057e-09	1.02253e-09	8.52112e-11	0.000313371
116	3.80931e-09	8.28656e-10	6.90547e-11	0.000253954
117	2.23272e-09	4.85693e-10	4.04744e-11	0.000148848
118	1.9931e-09	4.33568e-10	3.61307e-11	0.000132874
119	2.65919e-09	5.78464e-10	4.82053e-11	0.000177279
120	2.19028e-09	4.76461e-10	3.97051e-11	0.000146019
121	4.29413e-09	9.3412e-10	7.78434e-11	0.000286275
122	1.04045e-09	2.26334e-10	1.88612e-11	6.93636e-05
123	3.50861e-09	7.63243e-10	6.36036e-11	0.000233907
124	5.34207e-09	1.16208e-09	9.68402e-11	0.000356138
125	5.57538e-09	1.21284e-09	1.0107e-10	0.000371692
126	2.25409e-09	4.90343e-10	4.08619e-11	0.000150273
127	2.74906e-09	5.98014e-10	4.98345e-11	0.000183271
128	3.93602e-09	8.5622e-10	7.13516e-11	0.000262401
129	2.59082e-09	5.63593e-10	4.69661e-11	0.000172722
130	2.92191e-09	6.35616e-10	5.2968e-11	0.000194794
131	1.91645e-09	4.16893e-10	3.4741e-11	0.000127763
132	3.69264e-09	8.03276e-10	6.69396e-11	0.000246176
133	3.21747e-09	6.99911e-10	5.83259e-11	0.000214498
134	2.23483e-09	4.86152e-10	4.05127e-11	0.000148989
135	3.97563e-09	8.64836e-10	7.20696e-11	0.000265042
136	4.07171e-09	8.85736e-10	7.38114e-11	0.000271447
137	2.25297e-09	4.90097e-10	4.08414e-11	0.000150198
138	1.81071e-09	3.93892e-10	3.28244e-11	0.000120714
139	1.41712e-09	3.08273e-10	2.56894e-11	9.44748e-05
140	1.88113e-09	4.09211e-10	3.41009e-11	0.000125409
141	3.5551e-09	7.73356e-10	6.44464e-11	0.000237007
142	3.15676e-09	6.86704e-10	5.72253e-11	0.000210451
143	2.49518e-09	5.42787e-10	4.52323e-11	0.000166345
144	3.39918e-09	7.39437e-10	6.16198e-11	0.000226612
145	1.27112e-09	2.76511e-10	2.30426e-11	8.4741e-05
146	2.2176e-09	4.82403e-10	4.02003e-11	0.00014784
147	2.21175e-09	4.81132e-10	4.00943e-11	0.00014745
148	2.38106e-09	5.17963e-10	4.31636e-11	0.000158738
149	1.87694e-09	4.08299e-10	3.40249e-11	0.000125129
150	2.76129e-09	6.00676e-10	5.00563e-11	0.000184086
151	3.3838e-09	7.36093e-10	6.13411e-11	0.000225587
152	4.23756e-09	9.21815e-10	7.68179e-11	0.000282504
153	2.89705e-09	6.30209e-10	5.25174e-11	0.000193137
154	1.32453e-09	2.88131e-10	2.40109e-11	8.83022e-05
155	3.20125e-09	6.96382e-10	5.80319e-11	0.000213417
156	2.26977e-09	4.93753e-10	4.11461e-11	0.000151318
157	1.25024e-09	2.71971e-10	2.26642e-11	8.33495e-05
158	3.06781e-09	6.67353e-10	5.56128e-11	0.000204521
159	1.48298e-09	3.226e-10	2.68833e-11	9.88657e-05
160	2.28364e-09	4.9677e-10	4.13975e-11	0.000152243
161	3.33037e-09	7.2447e-10	6.03725e-11	0.000222025
162	1.0204e-08	2.21972e-09	1.84977e-10	0.000680268
163	3.38711e-09	7.36812e-10	6.1401e-11	0.000225807
164	2.40138e-09	5.22382e-10	4.35318e-11	0.000160092
165	2.54106e-09	5.52767e-10	4.60639e-11	0.000169404
166	3.67491e-09	7.99418e-10	6.66182e-11	0.000244994
167	2.98232e-09	6.48757e-10	5.40631e-11	0.000198821
168	1.95526e-09	4.25336e-10	3.54447e-11	0.000130351
169	2.61203e-09	5.68205e-10	4.73504e-11	0.000174135
170	5.11882e-09	1.11352e-09	9.27933e-11	0.000341255
171	1.85867e-09	4.04324e-10	3.36936e-11	0.000123911
172	2.77304e-09	6.03232e-10	5.02693e-11	0.000184869
173	4.07704e-09	8.86896e-10	7.3908e-11	0.000271803
174	3.79393e-09	8.2531e-10	6.87758e-11	0.000252929
175	2.39643e-09	5.21306e-10	4.34421e-11	0.000159762
176	1.91739e-09	4.17099e-10	3.47582e-11	0.000127826
177	5.09355e-09	1.10802e-09	9.23351e-11	0.00033957
178	5.83273e-09	1.26882e-09	1.05735e-10	0.000388849
179	2.2016e-09	4.78924e-10	3.99104e-11	0.000146774
180	2.94697e-09	6.41067e-10	5.34222e-11	0.000196465
181	2.99063e-09	6.50565e-10	5.42137e-11	0.000199375
182	2.01476e-09	4.3828e-10	3.65233e-11	0.000134317
183	3.46506e-09	7.53768e-10	6.2814e-11	0.000231004
184	4.78562e-09	1.04104e-09	8.67529e-11	0.000319041
185	1.92683e-09	4.19151e-10	3.49292e-11	0.000128455
186	2.78936e-09	6.06782e-10	5.05651e-11	0.000185957
187	2.98974e-09	6.50371e-10	5.41976e-11	0.000199316
188	1.60925e-09	3.50067e-10	2.91723e-11	0.000107283
189	1.51023e-09	3.28527e-10	2.73772e-11	0.000100682
190	2.81322e-09	6.11972e-10	5.09976e-11	0.000187548
191	6.85807e-09	1.49187e-09	1.24322e-10	0.000457205
192	2.39105e-09	5.20135e-10	4.33446e-11	0.000159403
193	2.64246e-09	5.74826e-10	4.79021e-11	0.000176164
194	5.06429e-09	1.10166e-09	9.18046e-11	0.000337619
195	2.96713e-09	6.45453e-10	5.37878e-11	0.000197809
196	4.54415e-09	9.88508e-10	8.23756e-11	0.000302943
197	2.54841e-09	5.54367e-10	4.61972e-11	0.000169894
198	8.55411e-09	1.86081e-09	1.55068e-10	0.000570274
199	2.1431e-09	4.66197e-10	3.88498e-11	0.000142873
200	7.19466e-09	1.56509e-09	1.30424e-10	0.000479644
201	2.95699e-09	6.43247e-10	5.36039e-11	0.000197133
202	2.05868e-09	4.47833e-10	3.73194e-11	0.000137245
203	3.79643e-09	8.25853e-10	6.88211e-11	0.000253095
204	2.53768e-09	5.52033e-10	4.60028e-11	0.000169179
205	4.67607e-09	1.01721e-09	8.47672e-11	0.000311738
206	4.11478e-09	8.95107e-10	7.45922e-11	0.000274319
207	1.46261e-09	3.18169e-10	2.6514e-11	9.75076e-05
208	4.35638e-09	9.47662e-10	7.89718e-11	0.000290425
209	2.30483e-09	5.01379e-10	4.17816e-11	0.000153655
210	1.73002e-09	3.76339e-10	3.13616e-11	0.000115335
211	2.05648e-09	4.47355e-10	3.72796e-11	0.000137099
212	3.91237e-09	8.51074e-10	7.09229e-11	0.000260825
213	4.1396e-09	9.00505e-10	7.50421e-11	0.000275973
214	3.55474e-09	7.73278e-10	6.44398e-11	0.000236983
215	3.30893e-09	7.19805e-10	5.99837e-11	0.000220595
216	3.64694e-09	7.93335e-10	6.61112e-11	0.00024313
217	1.66995e-09	3.63271e-10	3.02726e-11	0.00011133
218	3.92563e-09	8.53959e-10	7.11633e-11	0.000261709
219	2.77323e-09	6.03272e-10	5.02726e-11	0.000184882
220	2.60815e-09	5.67362e-10	4.72802e-11	0.000173877
221	2.24443e-09	4.8824e-10	4.06867e-11	0.000149629
222	3.24031e-09	7.04878e-10	5.87398e-11	0.000216021
223	2.79807e-09	6.08675e-10	5.0723e-11	0.000186538
224	1.84796e-09	4.01995e-10	3.34996e-11	0.000123198
225	5.92528e-09	1.28895e-09	1.07413e-10	0.000395019
226	3.12383e-09	6.79539e-10	5.66283e-11	0.000208255
227	3.02522e-09	6.58088e-10	5.48407e-11	0.000201681
228	4.69406e-09	1.02112e-09	8.50931e-11	0.000312937
229	4.07158e-09	8.85708e-10	7.3809e-11	0.000271439
230	2.24315e-09	4.87961e-10	4.06634e-11	0.000149543
231	3.11887e-09	6.7846e-10	5.65384e-11	0.000207924
232	3.69166e-09	8.03062e-10	6.69218e-11	0.000246111
233	1.88741e-09	4.10577e-10	3.42148e-11	0.000125828
234	1.95833e-09	4.26005e-10	3.55004e-11	0.000130556
235	5.6824e-09	1.23612e-09	1.0301e-10	0.000378826
236	5.43792e-09	1.18293e-09	9.85778e-11	0.000362528
237	2.9681e-09	6.45663e-10	5.38053e-11	0.000197873
238	2.92859e-09	6.37069e-10	5.30891e-11	0.000195239
239	4.05168e-09	8.81379e-10	7.34482e-11	0.000270112
240	1.37211e-09	2.98481e-10	2.48734e-11	9.1474e-05
241	2.41354e-09	5.25028e-10	4.37523e-11	0.000160903
242	2.93774e-09	6.39058e-10	5.32549e-11	0.000195849
243	2.43691e-09	5.30112e-10	4.4176e-11	0.000162461
244	3.08782e-09	6.71707e-10	5.59755e-11	0.000205855
245	1.91646e-09	4.16895e-10	3.47413e-11	0.000127764
246	4.57245e-09	9.94665e-10	8.28888e-11	0.00030483
247	3.04717e-09	6.62864e-10	5.52386e-11	0.000203145
248	2.77132e-09	6.02858e-10	5.02381e-11	0.000184755
249	1.4819e-09	3.22364e-10	2.68637e-11	9.87935e-05
250	3.25258e-09	7.07547e-10	5.89623e-11	0.000216839
251	2.22536e-09	4.84091e-10	4.03409e-11	0.000148357
252	2.6571e-09	5.78011e-10	4.81675e-11	0.00017714
253	2.25742e-09	4.91067e-10	4.09223e-11	0.000150495
254	2.61678e-09	5.6924e-10	4.74367e-11	0.000174452
255	2.68358e-09	5.83771e-10	4.86476e-11	0.000178906
256	3.12019e-09	6.78747e-10	5.65623e-11	0.000208012
257	2.29934e-09	5.00186e-10	4.16822e-11	0.00015329
258	6.41903e-09	1.39636e-09	1.16363e-10	0.000427936
259	1.12922e-09	2.45645e-10	2.04704e-11	7.52816e-05
260	1.78244e-09	3.87741e-10	3.23117e-11	0.000118829
261	2.29766e-09	4.9982e-10	4.16517e-11	0.000153177
262	1.37772e-09	2.99701e-10	2.49751e-11	9.1848e-05
263	2.2575e-09	4.91083e-10	4.09235e-11	0.0001505
264	1.97718e-09	4.30104e-10	3.5842e-11	0.000131812
265	5.39361e-09	1.17329e-09	9.77745e-11	0.000359574
266	1.82877e-09	3.97819e-10	3.31516e-11	0.000121918
267	3.9449e-09	8.5815e-10	7.15125e-11	0.000262993
268	3.41825e-09	7.43587e-10	6.19656e-11	0.000227883
269	3.0024e-09	6.53124e-10	5.4427e-11	0.00020016
270	3.23596e-09	7.03932e-10	5.8661e-11	0.000215731
271	1.2138e-09	2.64044e-10	2.20036e-11	8.09202e-05
272	1.17981e-09	2.56649e-10	2.13874e-11	7.8654e-05
273	3.35617e-09	7.30083e-10	6.08402e-11	0.000223745
274	1.79397e-09	3.9025e-10	3.25208e-11	0.000119598
275	2.11318e-09	4.59689e-10	3.83074e-11	0.000140879
276	2.2058e-09	4.79838e-10	3.99865e-11	0.000147053
277	3.06979e-09	6.67784e-10	5.56487e-11	0.000204653
278	1.91788e-09	4.17205e-10	3.4767e-11	0.000127859
279	1.85658e-09	4.03869e-10	3.36558e-11	0.000123772
280	3.41971e-09	7.43905e-10	6.19921e-11	0.000227981
281	3.28556e-09	7.14722e-10	5.95602e-11	0.000219037
282	3.43252e-09	7.46692e-10	6.22243e-11	0.000228835
283	2.30165e-09	5.00689e-10	4.1724e-11	0.000153444
284	7.21929e-09	1.57044e-09	1.3087e-10	0.000481286
285	2.21105e-09	4.8098e-10	4.00817e-11	0.000147404
286	3.65279e-09	7.94608e-10	6.62173e-11	0.00024352
287	2.81824e-09	6.13063e-10	5.10886e-11	0.000187883
288	2.0741e-09	4.51187e-10	3.75989e-11	0.000138273
289	2.12699e-09	4.62694e-10	3.85578e-11	0.0001418
290	2.55991e-09	5.56868e-10	4.64057e-11	0.000170661
291	2.6304e-09	5.72202e-10	4.76835e-11	0.00017536
292	2.94206e-09	6.39998e-10	5.33332e-11	0.000196137
293	2.12265e-09	4.61749e-10	3.84791e-11	0.00014151
294	6.00192e-09	1.30562e-09	1.08802e-10	0.000400128
295	5.6799e-09	1.23557e-09	1.02964e-10	0.00037866
296	2.59641e-09	5.64809e-10	4.70674e-11	0.000173094
297	2.55244e-09	5.55243e-10	4.62702e-11	0.000170163
298	2.00587e-09	4.36345e-10	3.63621e-11	0.000133725
299	2.67556e-09	5.82025e-10	4.85021e-11	0.00017837
300	3.24328e-09	7.05524e-10	5.87936e-11	0.000216218
301	2.69873e-09	5.87067e-10	4.89222e-11	0.000179916
302	2.28296e-09	4.96623e-10	4.13852e-11	0.000152198
303	4.62686e-09	1.0065e-09	8.38751e-11	0.000308458
304	2.63295e-09	5.72756e-10	4.77297e-11	0.00017553
305	5.98147e-09	1.30118e-09	1.08431e-10	0.000398765
306	2.03696e-09	4.43109e-10	3.69258e-11	0.000135798
307	3.10886e-09	6.76283e-10	5.63569e-11	0.000207257
308	1.48337e-09	3.22684e-10	2.68904e-11	9.88916e-05
309	3.43437e-09	7.47093e-10	6.22578e-11	0.000228958
310	1.80275e-09	3.92159e-10	3.26799e-11	0.000120183
311	2.95243e-09	6.42254e-10	5.35211e-11	0.000196828
312	2.18907e-09	4.76198e-10	3.96832e-11	0.000145938
313	3.2053e-09	6.97264e-10	5.81053e-11	0.000213687
314	3.51158e-09	7.63888e-10	6.36574e-11	0.000234105
315	3.31324e-09	7.20742e-10	6.00618e-11	0.000220882
316	2.98891e-09	6.50191e-10	5.41826e-11	0.000199261
317	3.11891e-09	6.78471e-10	5.65392e-11	0.000207928
318	4.96043e-09	1.07906e-09	8.99219e-11	0.000330695
319	2.91999e-09	6.35198e-10	5.29332e-11	0.000194666
320	2.38724e-09	5.19307e-10	4.32756e-11	0.000159149
321	3.56102e-09	7.74645e-10	6.45537e-11	0.000237402
322	3.40744e-09	7.41235e-10	6.17696e-11	0.000227163
323	2.27455e-09	4.94792e-10	4.12326e-11	0.000151636
324	3.6058e-09	7.84385e-10	6.53654e-11	0.000240387
325	2.89857e-09	6.30539e-10	5.25449e-11	0.000193238
326	2.11089e-09	4.59191e-10	3.82659e-11	0.000140726
327	3.06707e-09	6.67193e-10	5.55995e-11	0.000204472
328	1.67199e-09	3.63716e-10	3.03097e-11	0.000111466
329	2.3974e-09	5.21517e-10	4.34598e-11	0.000159827
330	5.46391e-09	1.18859e-09	9.90489e-11	0.000364261
331	1.52727e-09	3.32233e-10	2.76861e-11	0.000101818
332	2.70198e-09	5.87772e-10	4.8981e-11	0.000180132
333	4.06709e-09	8.84732e-10	7.37277e-11	0.00027114
334	4.3328e-09	9.42533e-10	7.85444e-11	0.000288854
335	1.16973e-09	2.54456e-10	2.12046e-11	7.79818e-05
336	5.60663e-09	1.21963e-09	1.01636e-10	0.000373775
337	1.5153e-09	3.29629e-10	2.74691e-11	0.00010102
338	4.37272e-09	9.51217e-10	7.92681e-11	0.000291515
339	1.79726e-09	3.90966e-10	3.25805e-11	0.000119817
340	4.56455e-09	9.92945e-10	8.27454e-11	0.000304303
341	1.94574e-09	4.23264e-10	3.5272e-11	0.000129716
342	3.82914e-09	8.32969e-10	6.94141e-11	0.000255276
343	3.94677e-09	8.58558e-10	7.15465e-11	0.000263118
344	4.233e-09	9.20822e-10	7.67352e-11	0.0002822
345	4.96195e-09	1.07939e-09	8.99496e-11	0.000330797
346	3.08683e-09	6.71492e-10	5.59577e-11	0.000205789
347	1.72892e-09	3.761e-10	3.13417e-11	0.000115262
348	4.25752e-09	9.26156e-10	7.71796e-11	0.000283834
349	4.47546e-09	9.73566e-10	8.11305e-11	0.000298364
350	2.23449e-09	4.86078e-10	4.05065e-11	0.000148966
351	2.10134e-09	4.57113e-10	3.80927e-11	0.000140089
352	1.81245e-09	3.94269e-10	3.28558e-11	0.00012083
353	5.08491e-09	1.10614e-09	9.21785e-11	0.000338994
354	1.94179e-09	4.22406e-10	3.52005e-11	0.000129453
355	1.82517e-09	3.97038e-10	3.30865e-11	0.000121678
356	5.4673e-09	1.18933e-09	9.91104e-11	0.000364487
357	7.88173e-10	1.71455e-10	1.42879e-11	5.25449e-05
358	2.98066e-09	6.48396e-10	5.4033e-11	0.000198711
359	6.40913e-09	1.39421e-09	1.16184e-10	0.000427275
360	2.15987e-09	4.69846e-10	3.91539e-11	0.000143992
361	3.59305e-09	7.81612e-10	6.51344e-11	0.000239537
362	1.76518e-09	3.83986e-10	3.19989e-11	0.000117678
363	3.00225e-09	6.53092e-10	5.44243e-11	0.00020015
364	1.8834e-09	4.09703e-10	3.4142e-11	0.00012556
365	2.27537e-09	4.94971e-10	4.12476e-11	0.000151692
366	3.44935e-09	7.50351e-10	6.25292e-11	0.000229956
367	2.73706e-09	5.95405e-10	4.96171e-11	0.000182471
368	2.9146e-09	6.34025e-10	5.28354e-11	0.000194307
369	1.93979e-09	4.21971e-10	3.51643e-11	0.00012932
370	2.35171e-09	5.11578e-10	4.26315e-11	0.000156781
371	2.30846e-09	5.02168e-10	4.18474e-11	0.000153897
372	3.0461e-09	6.62632e-10	5.52193e-11	0.000203074
373	4.06667e-09	8.84639e-10	7.372e-11	0.000271111
374	3.70414e-09	8.05777e-10	6.7148e-11	0.000246942
375	3.35296e-09	7.29384e-10	6.0782e-11	0.000223531
376	2.8259e-09	6.14729e-10	5.12274e-11	0.000188393
377	2.65965e-09	5.78566e-10	4.82138e-11	0.00017731
378	4.68345e-09	1.01881e-09	8.49009e-11	0.00031223
379	1.82054e-09	3.9603e-10	3.30025e-11	0.000121369
380	3.43198e-09	7.46574e-10	6.22145e-11	0.000228799
381	2.46293e-09	5.35771e-10	4.46476e-11	0.000164195
382	1.88138e-09	4.09264e-10	3.41053e-11	0.000125425
383	1.85681e-09	4.0392e-10	3.366e-11	0.000123788
384	3.31583e-09	7.21305e-10	6.01088e-11	0.000221055
385	2.87127e-09	6.24599e-10	5.20499e-11	0.000191418
386	4.17492e-09	9.08187e-10	7.56823e-11	0.000278328
387	3.8862e-09	8.45382e-10	7.04485e-11	0.00025908
388	3.95572e-09	8.60504e-10	7.17086e-11	0.000263714
389	7.38885e-10	1.60733e-10	1.33944e-11	4.9259e-05
390	4.51592e-09	9.82366e-10	8.18639e-11	0.000301061
391	3.31162e-09	7.20391e-10	6.00326e-11	0.000220775
392	1.36093e-09	2.96049e-10	2.46708e-11	9.07288e-05
393	5.46557e-09	1.18895e-09	9.90791e-11	0.000364371
394	4.33507e-09	9.43026e-10	7.85855e-11	0.000289005
395	5.42555e-09	1.18024e-09	9.83536e-11	0.000361703
396	4.25833e-09	9.26332e-10	7.71943e-11	0.000283888
397	3.57102e-09	7.76819e-10	6.47349e-11	0.000238068
398	2.115e-09	4.60085e-10	3.83404e-11	0.000141
399	1.81096e-09	3.93945e-10	3.28288e-11	0.000120731
400	3.67779e-09	8.00045e-10	6.66704e-11	0.000245186
401	1.15423e-09	2.51084e-10	2.09237e-11	7.69486e-05
402	5.80674e-09	1.26317e-09	1.05264e-10	0.000387116
403	6.95078e-09	1.51203e-09	1.26003e-10	0.000463385
404	1.48069e-09	3.22102e-10	2.68418e-11	9.8713e-05
405	1.98379e-09	4.31543e-10	3.59619e-11	0.000132253
406	2.89546e-09	6.29861e-10	5.24884e-11	0.00019303
407	3.76822e-09	8.19717e-10	6.83098e-11	0.000251215
408	2.51059e-09	5.4614e-10	4.55117e-11	0.000167373
409	3.01906e-09	6.5675e-10	5.47291e-11	0.000201271
410	3.29386e-09	7.16526e-10	5.97105e-11	0.00021959
411	5.57887e-09	1.2136e-09	1.01133e-10	0.000371925
412	5.0918e-09	1.10764e-09	9.23034e-11	0.000339453
413	4.4958e-09	9.7799e-10	8.14992e-11	0.00029972
414	3.16962e-09	6.89502e-10	5.74585e-11	0.000211308
415	4.22224e-09	9.18481e-10	7.65401e-11	0.000281482
416	2.91932e-09	6.35051e-10	5.29209e-11	0.000194621
417	3.34452e-09	7.27547e-10	6.06289e-11	0.000222968
418	1.97765e-09	4.30207e-10	3.58506e-11	0.000131844
419	6.1044e-09	1.32792e-09	1.1066e-10	0.00040696
420	2.75827e-09	6.00019e-10	5.00016e-11	0.000183885
421	4.13518e-09	8.99544e-10	7.4962e-11	0.000275679
422	1.71937e-09	3.74021e-10	3.11684e-11	0.000114624
423	2.70258e-09	5.87903e-10	4.89919e-11	0.000180172
424	2.72807e-09	5.93448e-10	4.9454e-11	0.000181871
425	2.69466e-09	5.8618e-10	4.88483e-11	0.000179644
426	1.77526e-09	3.86181e-10	3.21817e-11	0.000118351
427	2.6817e-09	5.83361e-10	4.86134e-11	0.00017878
428	1.68206e-09	3.65905e-10	3.0492e-11	0.000112137
429	3.27301e-09	7.11993e-10	5.93327e-11	0.000218201
430	4.37136e-09	9.50922e-10	7.92435e-11	0.000291424
431	2.41013e-09	5.24286e-10	4.36905e-11	0.000160675
432	4.11188e-09	8.94475e-10	7.45396e-11	0.000274125
433	2.33149e-09	5.07179e-10	4.2265e-11	0.000155433
434	3.59125e-09	7.8122e-10	6.51017e-11	0.000239417
435	9.65951e-10	2.10127e-10	1.75106e-11	6.43967e-05
436	2.49059e-09	5.41788e-10	4.5149e-11	0.000166039
437	3.52626e-09	7.67082e-10	6.39235e-11	0.000235084
438	2.54346e-09	5.5329e-10	4.61075e-11	0.000169564
439	5.20248e-09	1.13172e-09	9.43098e-11	0.000346832
440	2.39343e-09	5.20654e-10	4.33878e-11	0.000159562
441	3.32372e-09	7.23023e-10	6.02519e-11	0.000221581
442	2.36608e-09	5.14703e-10	4.28919e-11	0.000157739
443	5.45849e-09	1.18741e-09	9.89506e-11	0.000363899
444	4.1769e-09	9.08619e-10	7.57183e-11	0.00027846
445	4.93647e-09	1.07385e-09	8.94876e-11	0.000329098
446	3.71661e-09	8.0849e-10	6.73741e-11	0.000247774
447	1.86383e-09	4.05448e-10	3.37873e-11	0.000124256
448	2.82238e-09	6.13963e-10	5.11636e-11	0.000188158
449	2.39267e-09	5.20488e-10	4.3374e-11	0.000159511
450	3.80348e-09	8.27387e-10	6.89489e-11	0.000253565
451	3.29862e-09	7.17563e-10	5.97969e-11	0.000219908
452	3.2014e-09	6.96414e-10	5.80345e-11	0.000213427
453	4.58043e-09	9.96399e-10	8.30333e-11	0.000305362
454	2.77575e-09	6.0382e-10	5.03184e-11	0.00018505
455	3.05638e-09	6.64867e-10	5.54056e-11	0.000203759
456	2.00688e-09	4.36565e-10	3.63804e-11	0.000133792
457	1.50385e-09	3.27139e-10	2.72616e-11	0.000100257
458	3.78611e-09	8.23608e-10	6.8634e-11	0.000252407
459	1.79272e-09	3.89977e-10	3.24981e-11	0.000119514
460	3.10081e-09	6.74532e-10	5.6211e-11	0.000206721
461	3.17685e-09	6.91074e-10	5.75895e-11	0.00021179
462	4.25267e-09	9.25101e-10	7.70917e-11	0.000283511
463	1.21276e-09	2.63816e-10	2.19847e-11	8.08505e-05
464	2.62953e-09	5.72013e-10	4.76678e-11	0.000175302
465	3.7117e-09	8.07422e-10	6.72851e-11	0.000247447
466	4.10626e-09	8.93253e-10	7.44377e-11	0.000273751
467	3.44585e-09	7.49591e-10	6.24659e-11	0.000229723
468	2.44377e-09	5.31604e-10	4.43003e-11	0.000162918
469	2.68675e-09	5.84461e-10	4.8705e-11	0.000179117
470	3.57021e-09	7.76642e-10	6.47202e-11	0.000238014
471	6.24923e-09	1.35942e-09	1.13285e-10	0.000416615
472	3.54644e-09	7.71473e-10	6.42894e-11	0.00023643
473	3.43395e-09	7.47001e-10	6.22501e-11	0.00022893
474	4.78627e-09	1.04118e-09	8.67649e-11	0.000319085
475	9.18252e-09	1.99751e-09	1.66459e-10	0.000612168
476	3.07258e-09	6.68391e-10	5.56993e-11	0.000204839
477	1.63581e-09	3.55845e-10	2.96537e-11	0.000109054
478	2.30484e-09	5.01382e-10	4.17818e-11	0.000153656
479	2.95826e-09	6.43524e-10	5.3627e-11	0.000197218
480	2.1438e-09	4.66351e-10	3.88626e-11	0.00014292
481	4.85275e-09	1.05564e-09	8.79699e-11	0.000323517
482	6.00538e-09	1.30638e-09	1.08865e-10	0.000400359
483	2.53734e-09	5.51958e-10	4.59965e-11	0.000169156
484	1.60371e-09	3.48862e-10	2.90719e-11	0.000106914
485	1.72642e-09	3.75554e-10	3.12962e-11	0.000115094
486	2.65166e-09	5.76827e-10	4.80689e-11	0.000176777
487	2.07389e-09	4.51142e-10	3.75951e-11	0.000138259
488	1.98786e-09	4.32427e-10	3.60356e-11	0.000132524
489	4.70295e-09	1.02305e-09	8.52544e-11	0.00031353
490	1.58383e-09	3.44538e-10	2.87115e-11	0.000105589
491	5.37309e-09	1.16883e-09	9.74026e-11	0.000358206
492	2.05257e-09	4.46505e-10	3.72088e-11	0.000136838
493	2.18022e-09	4.74272e-10	3.95226e-11	0.000145348
494	2.02073e-09	4.39579e-10	3.66316e-11	0.000134716
495	5.16819e-09	1.12426e-09	9.36881e-11	0.000344546
496	4.5026e-09	9.79469e-10	8.16224e-11	0.000300173
497	3.09526e-09	6.73324e-10	5.61103e-11	0.00020635
498	3.31904e-09	7.22005e-10	6.01671e-11	0.00022127
499	2.713e-09	5.9017e-10	4.91809e-11	0.000180867
500	3.22996e-09	7.02628e-10	5.85523e-11	0.000215331
501	3.13208e-09	6.81335e-10	5.67779e-11	0.000208806
502	3.36086e-09	7.31102e-10	6.09251e-11	0.000224057
503	6.147e-09	1.33718e-09	1.11432e-10	0.0004098
504	2.10527e-09	4.57968e-10	3.8164e-11	0.000140351
505	4.42476e-09	9.62537e-10	8.02114e-11	0.000294984
506	2.46517e-09	5.36258e-10	4.46882e-11	0.000164344
507	1.66808e-09	3.62864e-10	3.02387e-11	0.000111205
508	3.42288e-09	7.44594e-10	6.20495e-11	0.000228192
509	3.11249e-09	6.77073e-10	5.64228e-11	0.000207499
510	6.27002e-09	1.36394e-09	1.13662e-10	0.000418001
511	7.92555e-09	1.72408e-09	1.43673e-10	0.00052837
512	2.08754e-09	4.54112e-10	3.78427e-11	0.000139169
513	2.39657e-09	5.21336e-10	4.34447e-11	0.000159771
514	1.38648e-09	3.01606e-10	2.51339e-11	9.24318e-05
515	1.47266e-09	3.20355e-10	2.66963e-11	9.81777e-05
516	5.57569e-09	1.2129e-09	1.01075e-10	0.000371712
517	3.46543e-09	7.53849e-10	6.28207e-11	0.000231028
518	2.78823e-09	6.06536e-10	5.05446e-11	0.000185882
519	2.40171e-09	5.22453e-10	4.35378e-11	0.000160114
520	3.55246e-09	7.72782e-10	6.43985e-11	0.000236831
521	2.26024e-09	4.9168e-10	4.09733e-11	0.000150683
522	1.35007e-09	2.93685e-10	2.44738e-11	9.00044e-05
523	3.06863e-09	6.67533e-10	5.56277e-11	0.000204576
524	2.50581e-09	5.45101e-10	4.5425e-11	0.000167054
525	2.58691e-09	5.62742e-10	4.68951e-11	0.000172461
526	4.8711e-09	1.05963e-09	8.83026e-11	0.00032474
527	3.22567e-09	7.01695e-10	5.84746e-11	0.000215045
528	2.94644e-09	6.40953e-10	5.34127e-11	0.00019643
529	1.47273e-09	3.20368e-10	2.66974e-11	9.81818e-05
530	1.83695e-09	3.99599e-10	3.32999e-11	0.000122463
531	2.74318e-09	5.96736e-10	4.9728e-11	0.000182879
532	3.25255e-09	7.07542e-10	5.89618e-11	0.000216837
533	4.17198e-09	9.07549e-10	7.56291e-11	0.000278132
534	4.43571e-09	9.64918e-10	8.04098e-11	0.000295714
535	1.50591e-09	3.27587e-10	2.72989e-11	0.000100394
536	2.72016e-09	5.91728e-10	4.93107e-11	0.000181344
537	3.20419e-09	6.97022e-10	5.80852e-11	0.000213613
538	3.64479e-09	7.92866e-10	6.60722e-11	0.000242986
539	3.50865e-09	7.63251e-10	6.36043e-11	0.00023391
540	1.35393e-09	2.94527e-10	2.45439e-11	9.02623e-05
541	2.32463e-09	5.05688e-10	4.21406e-11	0.000154976
542	4.08682e-09	8.89024e-10	7.40853e-11	0.000272455
543	1.74611e-09	3.79838e-10	3.16531e-11	0.000116407
544	1.15173e-09	2.5054e-10	2.08783e-11	7.67817e-05
545	5.55831e-09	1.20912e-09	1.0076e-10	0.000370554
546	1.70883e-09	3.7173e-10	3.09775e-11	0.000113922
547	3.02169e-09	6.57321e-10	5.47768e-11	0.000201446
548	2.94865e-09	6.41431e-10	5.34526e-11	0.000196576
549	3.77869e-09	8.21994e-10	6.84995e-11	0.000251912
550	4.02944e-09	8.7654e-10	7.3045e-11	0.000268629
551	3.8415e-09	8.35657e-10	6.96381e-11	0.0002561
552	1.95256e-09	4.24749e-10	3.53958e-11	0.000130171
553	2.33895e-09	5.08802e-10	4.24002e-11	0.00015593
554	4.43217e-09	9.64148e-10	8.03456e-11	0.000295478
555	4.58035e-09	9.96382e-10	8.30318e-11	0.000305356
556	1.14183e-08	2.48388e-09	2.0699e-10	0.000761222
557	3.29818e-09	7.17467e-10	5.97889e-11	0.000219879
558	2.52245e-09	5.48719e-10	4.57265e-11	0.000168163
559	3.56184e-09	7.74822e-10	6.45685e-11	0.000237456
560	3.21119e-09	6.98544e-10	5.8212e-11	0.000214079
561	3.49569e-09	7.60432e-10	6.33694e-11	0.000233046
562	1.40239e-09	3.05067e-10	2.54222e-11	9.34924e-05
563	2.00516e-09	4.36191e-10	3.63492e-11	0.000133677
564	2.64159e-09	5.74636e-10	4.78863e-11	0.000176106
565	4.32195e-09	9.40172e-10	7.83477e-11	0.00028813
566	3.00437e-09	6.53553e-10	5.44627e-11	0.000200291
567	3.69998e-09	8.04873e-10	6.70728e-11	0.000246666
568	3.20062e-09	6.96244e-10	5.80204e-11	0.000213375
569	1.5227e-09	3.3124e-10	2.76033e-11	0.000101514
570	4.50908e-09	9.80879e-10	8.17399e-11	0.000300605
571	1.31624e-09	2.86328e-10	2.38607e-11	8.77496e-05
572	1.15004e-09	2.50174e-10	2.08478e-11	7.66696e-05
573	4.14882e-09	9.02511e-10	7.52093e-11	0.000276588
574	1.91253e-09	4.16041e-10	3.46701e-11	0.000127502
575	4.11395e-09	8.94924e-10	7.4577e-11	0.000274263
576	5.59478e-09	1.21706e-09	1.01421e-10	0.000372986
577	1.71177e-09	3.72368e-10	3.10307e-11	0.000114118
578	3.86927e-09	8.41698e-10	7.01415e-11	0.000257951
579	4.63523e-09	1.00832e-09	8.40269e-11	0.000309016
580	4.12055e-09	8.96361e-10	7.46968e-11	0.000274704
581	2.94134e-09	6.39843e-10	5.33202e-11	0.00019609
582	2.83522e-09	6.16756e-10	5.13964e-11	0.000189014
583	5.06052e-09	1.10084e-09	9.17364e-11	0.000337368
584	1.78605e-09	3.88528e-10	3.23773e-11	0.00011907
585	1.07505e-09	2.33861e-10	1.94884e-11	7.16703e-05
586	2.60458e-09	5.66584e-10	4.72154e-11	0.000173638
587	4.27705e-09	9.30405e-10	7.75337e-11	0.000285137
588	3.42646e-09	7.45372e-10	6.21143e-11	0.000228431
589	2.71137e-09	5.89817e-10	4.91514e-11	0.000180758
590	6.04612e-09	1.31524e-09	1.09603e-10	0.000403075
591	3.97984e-09	8.6575e-10	7.21459e-11	0.000265322
592	2.36859e-09	5.15249e-10	4.29374e-11	0.000157906
593	2.99355e-09	6.51199e-10	5.42666e-11	0.00019957
594	3.04058e-09	6.61431e-10	5.51192e-11	0.000202706
595	2.88487e-09	6.27557e-10	5.22964e-11	0.000192324
596	2.28114e-09	4.96226e-10	4.13522e-11	0.000152076
597	1.97333e-09	4.29266e-10	3.57722e-11	0.000131555
598	2.07158e-09	4.50639e-10	3.75532e-11	0.000138105
599	4.89298e-09	1.06439e-09	8.86992e-11	0.000326198
600	3.02032e-09	6.57024e-10	5.4752e-11	0.000201355
601	4.29854e-09	9.3508e-10	7.79233e-11	0.000286569
602	4.89062e-09	1.06388e-09	8.86564e-11	0.000326041
603	2.01049e-09	4.37349e-10	3.64458e-11	0.000134032
604	2.20845e-09	4.80413e-10	4.00344e-11	0.00014723
605	3.1092e-09	6.76358e-10	5.63631e-11	0.00020728
606	6.14645e-09	1.33706e-09	1.11422e-10	0.000409764
607	4.98284e-09	1.08394e-09	9.03283e-11	0.00033219
608	2.47065e-09	5.37452e-10	4.47876e-11	0.00016471
609	1.31498e-09	2.86054e-10	2.38378e-11	8.76656e-05
610	3.02191e-09	6.57369e-10	5.47807e-11	0.000201461
611	5.57856e-09	1.21353e-09	1.01127e-10	0.000371904
612	6.10647e-09	1.32837e-09	1.10697e-10	0.000407098
613	3.73915e-09	8.13394e-10	6.77828e-11	0.000249277
614	2.5048e-09	5.4488e-10	4.54066e-11	0.000166987
615	2.06262e-09	4.4869e-10	3.73908e-11	0.000137508
616	3.34818e-09	7.28344e-10	6.06953e-11	0.000223212
617	2.94533e-09	6.40711e-10	5.33926e-11	0.000196356
618	2.45164e-09	5.33316e-10	4.4443e-11	0.000163443
619	1.94303e-09	4.22677e-10	3.5223e-11	0.000129536
620	3.03808e-09	6.60886e-10	5.50738e-11	0.000202539
621	2.50407e-09	5.44721e-10	4.53934e-11	0.000166938
622	4.33144e-09	9.42236e-10	7.85196e-11	0.000288762
623	5.07454e-09	1.10389e-09	9.19906e-11	0.000338303
624	3.7338e-09	8.1223e-10	6.76858e-11	0.00024892
625	7.0381e-09	1.53103e-09	1.27586e-10	0.000469206
626	1.64782e-09	3.58457e-10	2.98714e-11	0.000109854
627	2.37877e-09	5.17465e-10	4.31221e-11	0.000158585
628	2.88019e-09	6.26541e-10	5.22117e-11	0.000192013
629	2.62149e-09	5.70264e-10	4.7522e-11	0.000174766
630	1.11981e-09	2.43597e-10	2.02998e-11	7.46541e-05
631	2.44529e-09	5.31934e-10	4.43278e-11	0.000163019
632	4.66154e-09	1.01404e-09	8.45037e-11	0.000310769
633	1.32361e-09	2.8793e-10	2.39942e-11	8.82405e-05
634	2.3227e-09	5.05267e-10	4.21056e-11	0.000154847
635	1.20261e-09	2.61609e-10	2.18007e-11	8.0174e-05
636	2.91888e-09	6.34957e-10	5.29131e-11	0.000194592
637	3.6265e-09	7.88888e-10	6.57407e-11	0.000241767
638	4.23066e-09	9.20313e-10	7.66927e-11	0.000282044
639	4.1058e-09	8.93153e-10	7.44294e-11	0.00027372
640	3.45225e-09	7.50983e-10	6.25819e-11	0.00023015
641	2.02344e-09	4.40167e-10	3.66806e-11	0.000134896
642	5.99892e-09	1.30497e-09	1.08748e-10	0.000399928
643	2.7744e-09	6.03527e-10	5.02939e-11	0.00018496
644	2.68379e-09	5.83816e-10	4.86513e-11	0.000178919
645	5.79452e-09	1.26051e-09	1.05042e-10	0.000386301
646	2.25743e-09	4.91068e-10	4.09223e-11	0.000150495
647	1.55208e-09	3.3763e-10	2.81359e-11	0.000103472
648	1.73251e-09	3.76879e-10	3.14066e-11	0.0001155
649	2.08304e-09	4.53132e-10	3.7761e-11	0.000138869
650	2.87068e-09	6.24472e-10	5.20394e-11	0.000191379
651	3.84041e-09	8.35421e-10	6.96184e-11	0.000256027
652	2.06207e-09	4.4857e-10	3.73808e-11	0.000137471
653	2.35588e-09	5.12485e-10	4.27071e-11	0.000157059
654	3.11607e-09	6.77852e-10	5.64877e-11	0.000207738
655	3.06005e-09	6.65667e-10	5.54722e-11	0.000204004
656	5.3139e-09	1.15596e-09	9.63296e-11	0.00035426
657	3.16448e-09	6.88383e-10	5.73653e-11	0.000210966
658	4.27968e-09	9.30977e-10	7.75814e-11	0.000285312
659	2.52624e-09	5.49544e-10	4.57954e-11	0.000168416
660	2.29654e-09	4.99576e-10	4.16313e-11	0.000153103
661	4.20379e-09	9.14469e-10	7.62057e-11	0.000280253
662	4.42815e-09	9.63274e-10	8.02728e-11	0.00029521
663	1.38408e-09	3.01085e-10	2.50904e-11	9.2272e-05
664	3.59203e-09	7.81389e-10	6.51157e-11	0.000239468
665	3.7215e-09	8.09554e-10	6.74629e-11	0.0002481
666	2.25934e-09	4.91484e-10	4.0957e-11	0.000150623
667	3.47908e-09	7.56818e-10	6.30682e-11	0.000231938
668	2.42153e-09	5.26767e-10	4.38972e-11	0.000161436
669	2.68508e-09	5.84097e-10	4.86748e-11	0.000179005
670	4.26605e-09	9.28012e-10	7.73343e-11	0.000284403
671	3.15125e-09	6.85504e-10	5.71253e-11	0.000210083
672	1.93947e-09	4.21902e-10	3.51585e-11	0.000129298
673	3.11328e-09	6.77244e-10	5.6437e-11	0.000207552
674	3.06808e-09	6.67413e-10	5.56178e-11	0.000204539
675	6.54051e-09	1.42279e-09	1.18565e-10	0.000436034
676	1.79206e-09	3.89834e-10	3.24862e-11	0.000119471
677	4.20187e-09	9.14051e-10	7.61709e-11	0.000280125
678	2.40677e-09	5.23556e-10	4.36296e-11	0.000160452
679	2.16873e-09	4.71772e-10	3.93143e-11	0.000144582
680	2.32941e-09	5.06727e-10	4.22273e-11	0.000155294
681	5.28842e-09	1.15041e-09	9.58677e-11	0.000352561
682	3.68694e-09	8.02036e-10	6.68364e-11	0.000245796
683	1.72598e-09	3.7546e-10	3.12884e-11	0.000115065
684	1.29093e-09	2.80822e-10	2.34019e-11	8.60622e-05
685	2.08642e-09	4.53868e-10	3.78223e-11	0.000139095
686	3.78871e-09	8.24174e-10	6.86812e-11	0.000252581
687	1.8704e-09	4.06876e-10	3.39064e-11	0.000124693
688	3.63969e-09	7.91758e-10	6.59798e-11	0.000242646
689	2.02675e-09	4.40888e-10	3.67407e-11	0.000135117
690	3.83801e-09	8.34899e-10	6.95749e-11	0.000255867
691	4.1484e-09	9.02418e-10	7.52015e-11	0.00027656
692	2.05423e-09	4.46865e-10	3.72387e-11	0.000136948
693	2.35807e-09	5.12961e-10	4.27468e-11	0.000157205
694	3.49596e-09	7.60491e-10	6.33742e-11	0.000233064
695	2.45852e-09	5.34813e-10	4.45677e-11	0.000163901
696	3.04995e-09	6.63468e-10	5.5289e-11	0.00020333
697	4.09664e-09	8.91159e-10	7.42633e-11	0.000273109
698	1.79231e-09	3.89888e-10	3.24907e-11	0.000119487
699	3.58343e-09	7.79519e-10	6.49599e-11	0.000238895
700	2.16692e-09	4.7138e-10	3.92817e-11	0.000144462
701	2.19036e-09	4.76479e-10	3.97066e-11	0.000146024
702	2.42265e-09	5.27009e-10	4.39174e-11	0.00016151
703	1.89547e-09	4.1233e-10	3.43609e-11	0.000126365
704	2.30844e-09	5.02164e-10	4.1847e-11	0.000153896
705	5.83892e-09	1.27017e-09	1.05847e-10	0.000389261
706	5.0165e-09	1.09126e-09	9.09384e-11	0.000334434
707	3.69037e-09	8.02781e-10	6.68984e-11	0.000246024
708	4.56983e-09	9.94094e-10	8.28412e-11	0.000304655
709	2.29954e-09	5.00229e-10	4.16858e-11	0.000153303
710	2.99086e-09	6.50615e-10	5.42179e-11	0.000199391
711	1.92263e-09	4.18238e-10	3.48531e-11	0.000128175
712	2.52319e-09	5.48879e-10	4.574e-11	0.000168212
713	3.62246e-09	7.8801e-10	6.56675e-11	0.000241498
714	3.63708e-09	7.91189e-10	6.59324e-11	0.000242472
715	6.18826e-09	1.34616e-09	1.1218e-10	0.000412551
716	3.27523e-09	7.12475e-10	5.93729e-11	0.000218349
717	2.8655e-09	6.23343e-10	5.19453e-11	0.000191033
718	2.13766e-09	4.65013e-10	3.87511e-11	0.00014251
719	3.07005e-09	6.67842e-10	5.56535e-11	0.00020467
720	4.55812e-09	9.91547e-10	8.26289e-11	0.000303875
721	7.03683e-09	1.53075e-09	1.27563e-10	0.000469122
722	1.89973e-09	4.13257e-10	3.44381e-11	0.000126649
723	2.60828e-09	5.6739e-10	4.72825e-11	0.000173885
724	2.08683e-09	4.53956e-10	3.78297e-11	0.000139122
725	2.15899e-09	4.69655e-10	3.91379e-11	0.000143933
726	2.25385e-09	4.90289e-10	4.08574e-11	0.000150256
727	2.78335e-09	6.05473e-10	5.04561e-11	0.000185556
728	2.07769e-09	4.51969e-10	3.76641e-11	0.000138513
729	2.77976e-09	6.04693e-10	5.03911e-11	0.000185317
730	2.05872e-09	4.47843e-10	3.73202e-11	0.000137248
731	3.3928e-09	7.3805e-10	6.15042e-11	0.000226187
732	3.20658e-09	6.9754e-10	5.81283e-11	0.000213772
733	2.15856e-09	4.6956e-10	3.913e-11	0.000143904
734	3.5909e-09	7.81143e-10	6.50953e-11	0.000239393
735	2.98884e-09	6.50176e-10	5.41813e-11	0.000199256
736	2.25244e-09	4.89983e-10	4.08319e-11	0.000150163
737	1.94849e-09	4.23864e-10	3.5322e-11	0.0001299
738	4.57555e-09	9.95338e-10	8.29448e-11	0.000305036
739	1.42383e-09	3.09732e-10	2.5811e-11	9.4922e-05
740	1.78907e-09	3.89184e-10	3.2432e-11	0.000119271
741	2.42811e-09	5.28196e-10	4.40164e-11	0.000161874
742	3.30217e-09	7.18335e-10	5.98612e-11	0.000220145
743	2.84864e-09	6.19678e-10	5.16398e-11	0.00018991
744	1.70176e-09	3.70191e-10	3.08492e-11	0.000113451
745	2.1475e-09	4.67154e-10	3.89295e-11	0.000143166
746	2.36599e-09	5.14683e-10	4.28902e-11	0.000157732
747	2.04597e-09	4.45068e-10	3.7089e-11	0.000136398
748	3.30591e-09	7.19148e-10	5.9929e-11	0.000220394
749	2.40165e-09	5.22441e-10	4.35367e-11	0.00016011
750	4.75242e-09	1.03381e-09	8.61512e-11	0.000316828
751	2.27397e-09	4.94667e-10	4.12222e-11	0.000151598
752	9.09195e-10	1.97781e-10	1.64818e-11	6.0613e-05
753	1.7045e-09	3.70788e-10	3.0899e-11	0.000113634
754	3.68164e-09	8.00882e-10	6.67402e-11	0.000245443
755	2.75863e-09	6.00097e-10	5.00081e-11	0.000183909
756	3.78864e-09	8.2416e-10	6.868e-11	0.000252576
757	2.0748e-09	4.51339e-10	3.76116e-11	0.00013832
758	1.71857e-09	3.73848e-10	3.1154e-11	0.000114571
759	2.19392e-09	4.77253e-10	3.9771e-11	0.000146261
760	4.28957e-09	9.33129e-10	7.77608e-11	0.000285972
761	4.4941e-09	9.77621e-10	8.14684e-11	0.000299607
762	3.56743e-09	7.76037e-10	6.46698e-11	0.000237828
763	2.11813e-09	4.60765e-10	3.83971e-11	0.000141209
764	2.31438e-09	5.03456e-10	4.19547e-11	0.000154292
765	3.44486e-09	7.49374e-10	6.24479e-11	0.000229657
766	3.51332e-09	7.64266e-10	6.36889e-11	0.000234221
767	3.32283e-09	7.2283e-10	6.02358e-11	0.000221522
768	3.38975e-09	7.37386e-10	6.14488e-11	0.000225983
769	2.51609e-09	5.47336e-10	4.56113e-11	0.000167739
770	2.69723e-09	5.8674e-10	4.8895e-11	0.000179815
771	1.69366e-09	3.6843e-10	3.07025e-11	0.000112911
772	5.76725e-09	1.25458e-09	1.04548e-10	0.000384484
773	3.36875e-09	7.32818e-10	6.10682e-11	0.000224583
774	3.54637e-09	7.71458e-10	6.42881e-11	0.000236425
775	2.20174e-09	4.78954e-10	3.99128e-11	0.000146783
776	1.03493e-08	2.25133e-09	1.87611e-10	0.000689955
777	4.67814e-09	1.01766e-09	8.48047e-11	0.000311876
778	3.13233e-09	6.8139e-10	5.67825e-11	0.000208822
779	3.88004e-09	8.44043e-10	7.03369e-11	0.00025867
780	5.27812e-09	1.14817e-09	9.56809e-11	0.000351874
781	3.87836e-09	8.43675e-10	7.03063e-11	0.000258557
782	1.76374e-09	3.83675e-10	3.19729e-11	0.000117583
783	2.91986e-09	6.35169e-10	5.29307e-11	0.000194657
784	1.80627e-09	3.92925e-10	3.27438e-11	0.000120418
785	1.0473e-09	2.27824e-10	1.89853e-11	6.982e-05
786	3.13661e-09	6.8232e-10	5.686e-11	0.000209107
787	2.5987e-09	5.65306e-10	4.71089e-11	0.000173247
788	3.20559e-09	6.97325e-10	5.81105e-11	0.000213706
789	2.80886e-09	6.11023e-10	5.09186e-11	0.000187257
790	2.45887e-09	5.34888e-10	4.4574e-11	0.000163925
791	1.59084e-09	3.46063e-10	2.88385e-11	0.000106056
792	1.81961e-09	3.95827e-10	3.29856e-11	0.000121307
793	2.18794e-09	4.75952e-10	3.96627e-11	0.000145863
794	2.23693e-09	4.86609e-10	4.05508e-11	0.000149129
795	3.39559e-09	7.38657e-10	6.15548e-11	0.000226373
796	2.93624e-09	6.38733e-10	5.32277e-11	0.000195749
797	6.50289e-09	1.4146e-09	1.17883e-10	0.000433526
798	1.66726e-09	3.62687e-10	3.02239e-11	0.000111151
799	1.26513e-09	2.7521e-10	2.29342e-11	8.43423e-05
800	2.05904e-09	4.47911e-10	3.73259e-11	0.000137269
801	3.55456e-09	7.73239e-10	6.44366e-11	0.000236971
802	1.85225e-09	4.02929e-10	3.35774e-11	0.000123484
803	2.22192e-09	4.83343e-10	4.02786e-11	0.000148128
804	3.38777e-09	7.36956e-10	6.1413e-11	0.000225851
805	1.90408e-09	4.14202e-10	3.45168e-11	0.000126938
806	1.15164e-09	2.50522e-10	2.08768e-11	7.67762e-05
807	2.58506e-09	5.62339e-10	4.68616e-11	0.000172337
808	3.98195e-09	8.66212e-10	7.21843e-11	0.000265464
809	2.12205e-09	4.61618e-10	3.84682e-11	0.00014147
810	2.92001e-09	6.35203e-10	5.29336e-11	0.000194667
811	3.4634e-09	7.53407e-10	6.27839e-11	0.000230893
812	3.78681e-09	8.2376e-10	6.86467e-11	0.000252454
813	3.63151e-09	7.89979e-10	6.58316e-11	0.000242101
814	3.40725e-09	7.41195e-10	6.17662e-11	0.00022715
815	1.89628e-09	4.12506e-10	3.43755e-11	0.000126419
816	2.30501e-09	5.01418e-10	4.17849e-11	0.000153667
817	1.52872e-09	3.3255e-10	2.77125e-11	0.000101915
818	5.07961e-09	1.10499e-09	9.20825e-11	0.000338641
819	3.08942e-09	6.72054e-10	5.60045e-11	0.000205961
820	7.34885e-09	1.59863e-09	1.33219e-10	0.000489923
821	6.53163e-09	1.42085e-09	1.18404e-10	0.000435442
822	9.59626e-09	2.08751e-09	1.7396e-10	0.000639751
823	1.64786e-09	3.58466e-10	2.98722e-11	0.000109857
824	4.3069e-09	9.36898e-10	7.80749e-11	0.000287127
825	4.06465e-09	8.842e-10	7.36833e-11	0.000270976
826	3.28505e-09	7.14611e-10	5.95509e-11	0.000219003
827	2.28654e-09	4.97402e-10	4.14501e-11	0.000152436
828	1.49951e-09	3.26194e-10	2.71829e-11	9.99672e-05
829	3.09158e-09	6.72525e-10	5.60438e-11	0.000206106
830	1.98416e-09	4.31624e-10	3.59686e-11	0.000132278
831	2.02621e-09	4.40771e-10	3.67309e-11	0.000135081
832	3.24484e-09	7.05865e-10	5.88221e-11	0.000216323
833	2.2221e-09	4.83383e-10	4.02819e-11	0.00014814
834	3.01442e-09	6.5574e-10	5.4645e-11	0.000200961
835	2.24866e-09	4.89161e-10	4.07634e-11	0.000149911
836	2.66019e-09	5.78683e-10	4.82236e-11	0.000177346
837	2.10568e-09	4.58057e-10	3.81714e-11	0.000140378
838	4.62567e-09	1.00624e-09	8.38535e-11	0.000308378
839	5.15481e-09	1.12135e-09	9.34456e-11	0.000343654
840	2.75392e-09	5.99073e-10	4.99227e-11	0.000183595
841	2.42414e-09	5.27333e-10	4.39444e-11	0.000161609
842	2.02889e-09	4.41353e-10	3.67794e-11	0.000135259
843	1.54181e-09	3.35396e-10	2.79497e-11	0.000102787
844	3.9724e-09	8.64133e-10	7.20111e-11	0.000264827
845	2.04951e-09	4.45838e-10	3.71532e-11	0.000136634
846	1.96405e-09	4.27249e-10	3.56041e-11	0.000130937
847	4.21001e-09	9.15821e-10	7.63184e-11	0.000280667
848	1.42043e-09	3.08991e-10	2.57493e-11	9.4695e-05
849	2.51349e-09	5.4677e-10	4.55642e-11	0.000167566
850	1.68302e-09	3.66114e-10	3.05095e-11	0.000112201
851	2.33219e-09	5.07331e-10	4.22776e-11	0.000155479
852	2.09581e-09	4.55911e-10	3.79926e-11	0.000139721
853	2.59961e-09	5.65505e-10	4.71254e-11	0.000173308
854	3.21475e-09	6.99319e-10	5.82766e-11	0.000214317
855	1.66237e-09	3.61622e-10	3.01351e-11	0.000110824
856	4.08111e-09	8.87782e-10	7.39819e-11	0.000272074
857	3.06534e-09	6.66816e-10	5.5568e-11	0.000204356
858	2.95279e-09	6.42334e-10	5.35278e-11	0.000196853
859	3.04399e-09	6.62172e-10	5.5181e-11	0.000202933
860	4.41117e-09	9.5958e-10	7.9965e-11	0.000294078
861	4.12105e-09	8.96469e-10	7.47058e-11	0.000274737
862	2.64911e-09	5.76272e-10	4.80227e-11	0.000176607
863	5.78926e-09	1.25936e-09	1.04947e-10	0.000385951
864	2.68777e-09	5.84682e-10	4.87235e-11	0.000179185
865	3.08662e-09	6.71445e-10	5.59537e-11	0.000205774
866	2.30035e-09	5.00404e-10	4.17004e-11	0.000153357
867	3.97001e-09	8.63613e-10	7.19677e-11	0.000264667
868	5.477e-09	1.19144e-09	9.92863e-11	0.000365133
869	3.09027e-09	6.72239e-10	5.60199e-11	0.000206018
870	4.19142e-09	9.11778e-10	7.59815e-11	0.000279428
871	4.75229e-09	1.03379e-09	8.61488e-11	0.000316819
872	1.68327e-09	3.66168e-10	3.0514e-11	0.000112218
873	4.72294e-09	1.0274e-09	8.56169e-11	0.000314863
874	4.46106e-09	9.70433e-10	8.08694e-11	0.000297404
875	1.50738e-09	3.27906e-10	2.73255e-11	0.000100492
876	3.76966e-09	8.20029e-10	6.83358e-11	0.00025131
877	2.93612e-09	6.38706e-10	5.32255e-11	0.000195741
878	5.37405e-09	1.16904e-09	9.74199e-11	0.00035827
879	3.80465e-09	8.27642e-10	6.89701e-11	0.000253643
880	3.0415e-09	6.61631e-10	5.51359e-11	0.000202767
881	3.93991e-09	8.57066e-10	7.14222e-11	0.000262661
882	3.1961e-09	6.95262e-10	5.79385e-11	0.000213074
883	2.34564e-09	5.10257e-10	4.25214e-11	0.000156376
884	3.78513e-09	8.23395e-10	6.86162e-11	0.000252342
885	5.57268e-09	1.21225e-09	1.01021e-10	0.000371512
886	2.87409e-09	6.25213e-10	5.21011e-11	0.000191606
887	3.67192e-09	7.98769e-10	6.65641e-11	0.000244795
888	3.4321e-09	7.46599e-10	6.22166e-11	0.000228807
889	4.08162e-09	8.87893e-10	7.3991e-11	0.000272108
890	3.64132e-09	7.92113e-10	6.60094e-11	0.000242755
891	3.87554e-09	8.43063e-10	7.02552e-11	0.000258369
892	2.50862e-09	5.4571e-10	4.54758e-11	0.000167241
893	1.35939e-09	2.95713e-10	2.46428e-11	9.06259e-05
894	3.30281e-09	7.18473e-10	5.98728e-11	0.000220187
895	4.07034e-09	8.85438e-10	7.37865e-11	0.000271356
896	2.80581e-09	6.10359e-10	5.08632e-11	0.000187054
897	2.79834e-09	6.08735e-10	5.07279e-11	0.000186556
898	2.59236e-09	5.63928e-10	4.6994e-11	0.000172824
899	3.38929e-09	7.37286e-10	6.14405e-11	0.000225953
900	2.41317e-09	5.24948e-10	4.37457e-11	0.000160878
901	4.37061e-09	9.50758e-10	7.92298e-11	0.000291374
902	1.40814e-09	3.06319e-10	2.55265e-11	9.3876e-05
903	2.61704e-09	5.69295e-10	4.74412e-11	0.000174469
904	4.80629e-09	1.04553e-09	8.71278e-11	0.00032042
905	3.6892e-09	8.02527e-10	6.68773e-11	0.000245947
906	2.52663e-09	5.49629e-10	4.58024e-11	0.000168442
907	3.92799e-09	8.54473e-10	7.12061e-11	0.000261866
908	1.02217e-09	2.22356e-10	1.85297e-11	6.81444e-05
909	3.71795e-09	8.08782e-10	6.73985e-11	0.000247863
910	3.26778e-09	7.10853e-10	5.92378e-11	0.000217852
911	3.20593e-09	6.974e-10	5.81167e-11	0.000213729
912	2.91993e-09	6.35185e-10	5.29321e-11	0.000194662
913	2.20391e-09	4.79426e-10	3.99521e-11	0.000146927
914	5.37929e-09	1.17018e-09	9.75149e-11	0.000358619
915	1.99735e-09	4.34492e-10	3.62076e-11	0.000133157
916	1.86382e-09	4.05444e-10	3.3787e-11	0.000124255
917	2.46334e-09	5.3586e-10	4.4655e-11	0.000164223
918	2.74481e-09	5.97089e-10	4.97574e-11	0.000182987
919	5.63309e-09	1.22539e-09	1.02116e-10	0.000375539
920	3.61196e-09	7.85725e-10	6.54771e-11	0.000240797
921	4.42239e-09	9.62021e-10	8.01684e-11	0.000294826
922	6.16874e-09	1.34191e-09	1.11826e-10	0.000411249
923	2.72803e-09	5.9344e-10	4.94533e-11	0.000181869
924	1.56796e-09	3.41085e-10	2.84238e-11	0.000104531
925	1.52638e-09	3.32039e-10	2.76699e-11	0.000101758
926	3.18949e-09	6.93824e-10	5.78187e-11	0.000212633
927	3.00747e-09	6.54227e-10	5.45189e-11	0.000200498
928	3.11855e-09	6.78392e-10	5.65327e-11	0.000207903
929	2.41478e-09	5.25297e-10	4.37747e-11	0.000160985
930	2.6807e-09	5.83143e-10	4.85953e-11	0.000178713
931	2.1533e-09	4.68416e-10	3.90346e-11	0.000143553
932	2.64915e-09	5.76281e-10	4.80234e-11	0.00017661
933	5.14435e-09	1.11907e-09	9.32559e-11	0.000342956
934	3.01988e-09	6.56928e-10	5.4744e-11	0.000201326
935	8.14327e-09	1.77144e-09	1.4762e-10	0.000542884
936	3.29761e-09	7.17344e-10	5.97787e-11	0.000219841
937	4.56595e-09	9.9325e-10	8.27708e-11	0.000304396
938	3.40547e-09	7.40806e-10	6.17338e-11	0.000227031
939	1.85774e-09	4.04122e-10	3.36768e-11	0.000123849
940	4.69992e-09	1.02239e-09	8.51995e-11	0.000313328
941	3.67639e-09	7.99742e-10	6.66451e-11	0.000245093
942	3.02925e-09	6.58965e-10	5.49137e-11	0.00020195
943	3.41969e-09	7.43899e-10	6.19916e-11	0.000227979
944	6.59777e-09	1.43524e-09	1.19603e-10	0.000439851
945	2.24363e-09	4.88067e-10	4.06722e-11	0.000149576
946	4.29106e-09	9.33453e-10	7.77878e-11	0.000286071
947	5.4836e-09	1.19287e-09	9.94059e-11	0.000365573
948	3.84509e-09	8.3644e-10	6.97033e-11	0.00025634
949	6.357e-09	1.38287e-09	1.15239e-10	0.0004238
950	4.34951e-09	9.46167e-10	7.88472e-11	0.000289967
951	2.57323e-09	5.59766e-10	4.66472e-11	0.000171549
952	2.30169e-09	5.00695e-10	4.17246e-11	0.000153446
953	4.96317e-09	1.07966e-09	8.99717e-11	0.000330878
954	3.39662e-09	7.38881e-10	6.15735e-11	0.000226441
955	2.94993e-09	6.41712e-10	5.3476e-11	0.000196662
956	4.03325e-09	8.77371e-10	7.31143e-11	0.000268884
957	4.04592e-09	8.80125e-10	7.33438e-11	0.000269728
958	2.46328e-09	5.35848e-10	4.4654e-11	0.000164219
959	3.06947e-09	6.67715e-10	5.5643e-11	0.000204632
960	1.70717e-09	3.71367e-10	3.09472e-11	0.000113811
961	3.59034e-09	7.81022e-10	6.50851e-11	0.000239356
962	4.59873e-09	1.00038e-09	8.33651e-11	0.000306582
963	7.88063e-09	1.71431e-09	1.42859e-10	0.000525375
964	2.26817e-09	4.93404e-10	4.1117e-11	0.000151211
965	3.27066e-09	7.11481e-10	5.92901e-11	0.000218044
966	1.85741e-09	4.0405e-10	3.36708e-11	0.000123827
967	5.71063e-09	1.24226e-09	1.03521e-10	0.000380708
968	2.41258e-09	5.24819e-10	4.37349e-11	0.000160839
969	2.5391e-09	5.52342e-10	4.60285e-11	0.000169274
970	3.47085e-09	7.55028e-10	6.2919e-11	0.00023139
971	3.14853e-09	6.84912e-10	5.7076e-11	0.000209902
972	1.72862e-09	3.76035e-10	3.13363e-11	0.000115242
973	3.47342e-09	7.55588e-10	6.29656e-11	0.000231561
974	3.91736e-09	8.52159e-10	7.10133e-11	0.000261157
975	5.05103e-09	1.09877e-09	9.15643e-11	0.000336735
976	2.46966e-09	5.37235e-10	4.47696e-11	0.000164644
977	3.77858e-09	8.21971e-10	6.84976e-11	0.000251906
978	3.2658e-09	7.10424e-10	5.9202e-11	0.00021772
979	1.39347e-09	3.03127e-10	2.52606e-11	9.28978e-05
980	6.27929e-09	1.36596e-09	1.1383e-10	0.000418619
981	2.8729e-09	6.24953e-10	5.20794e-11	0.000191526
982	3.26862e-09	7.11037e-10	5.92531e-11	0.000217908
983	3.02771e-09	6.58631e-10	5.48859e-11	0.000201847
984	1.69255e-09	3.68187e-10	3.06823e-11	0.000112837
985	5.09326e-09	1.10796e-09	9.23298e-11	0.00033955
986	2.77378e-09	6.03393e-10	5.02827e-11	0.000184919
987	2.87056e-09	6.24445e-10	5.20371e-11	0.000191371
988	2.89123e-09	6.28942e-10	5.24119e-11	0.000192749
989	3.36455e-09	7.31905e-10	6.09921e-11	0.000224303
990	5.27518e-09	1.14753e-09	9.56276e-11	0.000351678
991	3.33601e-09	7.25696e-10	6.04747e-11	0.000222401
992	2.54169e-09	5.52904e-10	4.60753e-11	0.000169446
993	3.04449e-09	6.62282e-10	5.51901e-11	0.000202966
994	2.4281e-09	5.28195e-10	4.40163e-11	0.000161873
995	3.12895e-09	6.80654e-10	5.67212e-11	0.000208597
996	3.78249e-09	8.22822e-10	6.85685e-11	0.000252166
997	5.06274e-09	1.10132e-09	9.17765e-11	0.000337516
998	4.70262e-09	1.02298e-09	8.52485e-11	0.000313508
999	5.24156e-09	1.14022e-09	9.50183e-11	0.000349438
1000	3.57165e-09	7.76956e-10	6.47463e-11	0.00023811
1001	3.61799e-09	7.87036e-10	6.55863e-11	0.000241199
1002	2.47416e-09	5.38215e-10	4.48512e-11	0.000164944
1003	2.04088e-09	4.43961e-10	3.69968e-11	0.000136059
1004	4.07999e-09	8.87538e-10	7.39615e-11	0.000272
1005	2.40125e-09	5.22353e-10	4.35294e-11	0.000160083
1006	3.69667e-09	8.04152e-10	6.70127e-11	0.000246445
1007	3.39849e-09	7.39288e-10	6.16073e-11	0.000226566
1008	1.68693e-09	3.66966e-10	3.05805e-11	0.000112462
1009	2.59081e-09	5.63591e-10	4.69659e-11	0.000172721
1010	2.62564e-09	5.71168e-10	4.75973e-11	0.000175043
1011	3.93796e-09	8.56641e-10	7.13867e-11	0.000262531
1012	4.0908e-09	8.8989e-10	7.41575e-11	0.00027272
1013	4.1328e-09	8.99025e-10	7.49187e-11	0.00027552
1014	2.26548e-09	4.92819e-10	4.10683e-11	0.000151032
1015	8.82768e-09	1.92032e-09	1.60027e-10	0.000588512
1016	1.59627e-09	3.47243e-10	2.89369e-11	0.000106418
1017	1.8085e-09	3.93411e-10	3.27842e-11	0.000120567
1018	5.90377e-09	1.28427e-09	1.07023e-10	0.000393585
1019	3.28936e-09	7.15548e-10	5.9629e-11	0.000219291
1020	2.85771e-09	6.2165e-10	5.18042e-11	0.000190514
1021	4.03842e-09	8.78494e-10	7.32078e-11	0.000269228
1022	3.87188e-09	8.42267e-10	7.01889e-11	0.000258126
1023	2.04328e-09	4.44484e-10	3.70404e-11	0.000136219
1024	3.21595e-09	6.9958e-10	5.82983e-11	0.000214397
1025	5.79147e-09	1.25984e-09	1.04987e-10	0.000386098
1026	2.01512e-09	4.38358e-10	3.65298e-11	0.000134341
1027	1.56974e-09	3.41472e-10	2.8456e-11	0.000104649
1028	2.09544e-09	4.5583e-10	3.79858e-11	0.000139696
1029	2.35757e-09	5.12852e-10	4.27377e-11	0.000157171
1030	3.79601e-09	8.25763e-10	6.88136e-11	0.000253068
1031	4.15769e-09	9.0444e-10	7.537e-11	0.000277179
1032	3.49027e-09	7.59254e-10	6.32712e-11	0.000232685
1033	6.52755e-09	1.41997e-09	1.18331e-10	0.00043517
1034	2.48167e-09	5.39848e-10	4.49873e-11	0.000165445
1035	1.78849e-09	3.89058e-10	3.24215e-11	0.000119233
1036	1.9498e-09	4.24147e-10	3.53456e-11	0.000129986
1037	2.33245e-09	5.07387e-10	4.22822e-11	0.000155496
1038	3.11383e-09	6.77366e-10	5.64471e-11	0.000207589
1039	2.63368e-09	5.72915e-10	4.77429e-11	0.000175579
1040	3.4499e-09	7.50471e-10	6.25392e-11	0.000229993
1041	2.6649e-09	5.79706e-10	4.83089e-11	0.00017766
1042	2.97459e-09	6.47076e-10	5.3923e-11	0.000198306
1043	1.47716e-09	3.21333e-10	2.67777e-11	9.84773e-05
1044	2.96122e-09	6.44168e-10	5.36806e-11	0.000197415
1045	4.06128e-09	8.83467e-10	7.36222e-11	0.000270752
1046	3.02384e-09	6.57788e-10	5.48157e-11	0.000201589
1047	4.75767e-09	1.03496e-09	8.62463e-11	0.000317178
1048	2.50155e-09	5.44172e-10	4.53477e-11	0.00016677
1049	1.965e-09	4.27456e-10	3.56213e-11	0.000131
1050	1.97745e-09	4.30162e-10	3.58468e-11	0.00013183
1051	3.59063e-09	7.81084e-10	6.50904e-11	0.000239375
1052	2.20976e-09	4.80698e-10	4.00582e-11	0.000147317
1053	2.22013e-09	4.82955e-10	4.02462e-11	0.000148009
1054	1.62511e-09	3.53517e-10	2.94597e-11	0.000108341
1055	1.92322e-09	4.18365e-10	3.48638e-11	0.000128214
1056	2.23134e-09	4.85392e-10	4.04494e-11	0.000148756
1057	2.29931e-09	5.0018e-10	4.16816e-11	0.000153288
1058	2.59766e-09	5.6508e-10	4.709e-11	0.000173177
1059	1.75014e-09	3.80716e-10	3.17263e-11	0.000116676
1060	3.20209e-09	6.96564e-10	5.8047e-11	0.000213473
1061	2.48675e-09	5.40954e-10	4.50795e-11	0.000165784
1062	3.34667e-09	7.28016e-10	6.0668e-11	0.000223111
1063	1.95513e-09	4.25308e-10	3.54424e-11	0.000130342
1064	2.51796e-09	5.47742e-10	4.56451e-11	0.000167864
1065	4.22666e-09	9.19444e-10	7.66203e-11	0.000281778
1066	3.44879e-09	7.5023e-10	6.25192e-11	0.000229919
1067	3.00609e-09	6.53927e-10	5.44939e-11	0.000200406
1068	3.52743e-09	7.67337e-10	6.39448e-11	0.000235162
1069	5.34503e-09	1.16273e-09	9.68939e-11	0.000356335
1070	3.9429e-09	8.57716e-10	7.14763e-11	0.00026286
1071	3.10663e-09	6.75798e-10	5.63165e-11	0.000207108
1072	4.01172e-09	8.72686e-10	7.27238e-11	0.000267448
1073	3.3608e-09	7.31088e-10	6.0924e-11	0.000224053
1074	1.93837e-09	4.21661e-10	3.51384e-11	0.000129224
1075	3.6728e-09	7.98959e-10	6.658e-11	0.000244853
1076	3.34863e-09	7.28441e-10	6.07034e-11	0.000223242
1077	1.37142e-09	2.98331e-10	2.48609e-11	9.1428e-05
1078	2.72782e-09	5.93394e-10	4.94495e-11	0.000181855
1079	2.8843e-09	6.27433e-10	5.22861e-11	0.000192286
1080	8.99513e-09	1.95675e-09	1.63062e-10	0.000599676
1081	3.00104e-09	6.5283e-10	5.44025e-11	0.00020007
1082	3.24218e-09	7.05286e-10	5.87738e-11	0.000216146
1083	4.8128e-09	1.04695e-09	8.72457e-11	0.000320853
1084	4.14179e-09	9.00981e-10	7.50817e-11	0.000276119
1085	2.3707e-09	5.15708e-10	4.29757e-11	0.000158047
1086	2.694e-09	5.86037e-10	4.88364e-11	0.0001796
1087	1.86364e-09	4.05404e-10	3.37837e-11	0.000124242
1088	3.11092e-09	6.76732e-10	5.63943e-11	0.000207395
1089	4.83415e-09	1.05159e-09	8.76328e-11	0.000322277
1090	3.20637e-09	6.97495e-10	5.81246e-11	0.000213758
1091	5.17598e-09	1.12595e-09	9.38294e-11	0.000345065
1092	4.00838e-09	8.71959e-10	7.26632e-11	0.000267225
1093	2.88772e-09	6.28178e-10	5.23482e-11	0.000192515
1094	5.29262e-09	1.15133e-09	9.59439e-11	0.000352842
1095	2.87504e-09	6.2542e-10	5.21183e-11	0.000191669
1096	1.83592e-09	3.99375e-10	3.32812e-11	0.000122394
1097	1.22105e-09	2.6562e-10	2.2135e-11	8.14031e-05
1098	3.35848e-09	7.30585e-10	6.0882e-11	0.000223899
1099	4.05504e-09	8.82109e-10	7.35091e-11	0.000270336
1100	5.01552e-09	1.09105e-09	9.09207e-11	0.000334368
1101	1.44519e-09	3.14378e-10	2.61981e-11	9.63458e-05
1102	1.70223e-09	3.70294e-10	3.08579e-11	0.000113482
1103	2.63021e-09	5.72161e-10	4.76801e-11	0.000175347
1104	4.4656e-09	9.71422e-10	8.09518e-11	0.000297707
1105	2.62053e-09	5.70056e-10	4.75047e-11	0.000174702
1106	3.05394e-09	6.64337e-10	5.53614e-11	0.000203596
1107	2.7661e-09	6.01722e-10	5.01435e-11	0.000184407
1108	3.35502e-09	7.29831e-10	6.08192e-11	0.000223668
1109	2.89189e-09	6.29085e-10	5.24237e-11	0.000192793
1110	2.81312e-09	6.1195e-10	5.09959e-11	0.000187541
1111	4.28145e-09	9.31361e-10	7.76134e-11	0.00028543
1112	3.22647e-09	7.01867e-10	5.84889e-11	0.000215098
1113	3.22096e-09	7.00668e-10	5.8389e-11	0.00021473
1114	3.01752e-09	6.56415e-10	5.47012e-11	0.000201168
1115	5.4137e-09	1.17767e-09	9.81388e-11	0.000360914
1116	1.41814e-09	3.08494e-10	2.57078e-11	9.45426e-05
1117	5.83054e-09	1.26834e-09	1.05695e-10	0.000388703
1118	3.35609e-09	7.30065e-10	6.08387e-11	0.000223739
1119	3.6946e-09	8.03702e-10	6.69752e-11	0.000246307
1120	4.30349e-09	9.36156e-10	7.8013e-11	0.000286899
1121	3.37618e-09	7.34434e-10	6.12028e-11	0.000225078
1122	2.07711e-09	4.51843e-10	3.76536e-11	0.000138474
1123	2.14226e-09	4.66015e-10	3.88346e-11	0.000142817
1124	2.95994e-09	6.43887e-10	5.36573e-11	0.000197329
1125	3.79199e-09	8.24887e-10	6.87406e-11	0.000252799
1126	5.73929e-09	1.24849e-09	1.04041e-10	0.000382619
1127	4.12291e-09	8.96875e-10	7.47396e-11	0.000274861
1128	2.48339e-09	5.40223e-10	4.50186e-11	0.00016556
1129	2.29299e-09	4.98804e-10	4.1567e-11	0.000152866
1130	4.86167e-09	1.05758e-09	8.81317e-11	0.000324111
1131	3.17698e-09	6.91101e-10	5.75918e-11	0.000211798
1132	2.01874e-09	4.39145e-10	3.65955e-11	0.000134583
1133	2.87161e-09	6.24674e-10	5.20562e-11	0.000191441
1134	2.03239e-09	4.42115e-10	3.68429e-11	0.000135493
1135	4.02325e-09	8.75194e-10	7.29328e-11	0.000268216
1136	2.68021e-09	5.83037e-10	4.85864e-11	0.00017868
1137	1.78347e-09	3.87966e-10	3.23305e-11	0.000118898
1138	3.80312e-09	8.27308e-10	6.89424e-11	0.000253541
1139	2.34496e-09	5.10109e-10	4.2509e-11	0.000156331
1140	3.85057e-09	8.37632e-10	6.98026e-11	0.000256705
1141	2.85639e-09	6.21363e-10	5.17802e-11	0.000190426
1142	4.01858e-09	8.7418e-10	7.28483e-11	0.000267906
1143	3.43966e-09	7.48243e-10	6.23536e-11	0.000229311
1144	4.44057e-09	9.65975e-10	8.04979e-11	0.000296038
1145	2.85885e-09	6.21898e-10	5.18248e-11	0.00019059
1146	4.58739e-09	9.97914e-10	8.31595e-11	0.000305826
1147	3.82823e-09	8.32771e-10	6.93976e-11	0.000255215
1148	4.2132e-09	9.16516e-10	7.63763e-11	0.00028088
1149	2.5555e-09	5.55908e-10	4.63256e-11	0.000170366
1150	5.01622e-09	1.0912e-09	9.09333e-11	0.000334414
1151	2.23583e-09	4.8637e-10	4.05309e-11	0.000149056
1152	3.21211e-09	6.98745e-10	5.82287e-11	0.000214141
1153	4.81711e-09	1.04789e-09	8.73239e-11	0.000321141
1154	2.77209e-09	6.03025e-10	5.02521e-11	0.000184806
1155	4.59746e-09	1.00011e-09	8.33421e-11	0.000306498
1156	1.44042e-09	3.13341e-10	2.61117e-11	9.6028e-05
1157	6.87765e-09	1.49613e-09	1.24677e-10	0.00045851
1158	3.02576e-09	6.58207e-10	5.48506e-11	0.000201718
1159	2.99333e-09	6.51151e-10	5.42626e-11	0.000199555
1160	1.61729e-09	3.51815e-10	2.93179e-11	0.000107819
1161	3.10716e-09	6.75913e-10	5.63261e-11	0.000207144
1162	2.23772e-09	4.86781e-10	4.05651e-11	0.000149181
1163	3.71053e-09	8.07168e-10	6.7264e-11	0.000247369
1164	3.99723e-09	8.69535e-10	7.24612e-11	0.000266482
1165	2.71419e-09	5.90429e-10	4.92025e-11	0.000180946
1166	3.23038e-09	7.02718e-10	5.85598e-11	0.000215359
1167	2.4517e-09	5.3333e-10	4.44441e-11	0.000163447
1168	1.26376e-09	2.74911e-10	2.29093e-11	8.42507e-05
1169	1.80957e-09	3.93644e-10	3.28037e-11	0.000120638
1170	3.83003e-09	8.33164e-10	6.94303e-11	0.000255336
1171	2.27371e-09	4.94611e-10	4.12176e-11	0.000151581
1172	3.15707e-09	6.8677e-10	5.72308e-11	0.000210471
1173	1.24695e-09	2.71254e-10	2.26045e-11	8.31298e-05
1174	3.54734e-09	7.71668e-10	6.43057e-11	0.000236489
1175	3.19518e-09	6.95061e-10	5.79218e-11	0.000213012
1176	2.5865e-09	5.62652e-10	4.68876e-11	0.000172433
1177	8.35549e-10	1.81761e-10	1.51467e-11	5.57033e-05
1178	4.69332e-09	1.02096e-09	8.50798e-11	0.000312888
1179	3.87026e-09	8.41914e-10	7.01595e-11	0.000258017
1180	2.54757e-09	5.54184e-10	4.6182e-11	0.000169838
1181	2.26323e-09	4.9233e-10	4.10275e-11	0.000150882
1182	2.73737e-09	5.95471e-10	4.96226e-11	0.000182491
1183	4.11997e-09	8.96234e-10	7.46862e-11	0.000274665
1184	2.45874e-09	5.34861e-10	4.45718e-11	0.000163916
1185	5.42021e-09	1.17908e-09	9.82568e-11	0.000361348
1186	5.54893e-09	1.20708e-09	1.0059e-10	0.000369929
1187	2.62648e-09	5.7135e-10	4.76125e-11	0.000175099
1188	4.30205e-09	9.35844e-10	7.7987e-11	0.000286804
1189	3.71786e-09	8.08762e-10	6.73968e-11	0.000247857
1190	1.84077e-09	4.0043e-10	3.33692e-11	0.000122718
1191	3.41927e-09	7.43807e-10	6.19839e-11	0.000227951
1192	2.1084e-09	4.58649e-10	3.82208e-11	0.00014056
1193	2.86265e-09	6.22723e-10	5.18936e-11	0.000190843
1194	2.38775e-09	5.19418e-10	4.32848e-11	0.000159184
1195	2.61522e-09	5.689e-10	4.74083e-11	0.000174348
1196	2.86428e-09	6.23078e-10	5.19232e-11	0.000190952
1197	5.21313e-09	1.13403e-09	9.45029e-11	0.000347542
1198	2.73698e-09	5.95387e-10	4.96156e-11	0.000182465
1199	1.55974e-09	3.39298e-10	2.82748e-11	0.000103983
1200	3.80629e-09	8.27999e-10	6.89999e-11	0.000253753
1201	3.17508e-09	6.90689e-10	5.75574e-11	0.000211672
1202	3.019e-09	6.56736e-10	5.4728e-11	0.000201267
1203	3.73813e-09	8.1317e-10	6.77642e-11	0.000249208
1204	1.28964e-09	2.80541e-10	2.33784e-11	8.59759e-05
1205	2.92704e-09	6.36732e-10	5.3061e-11	0.000195136
1206	2.40815e-09	5.23854e-10	4.36545e-11	0.000160543
1207	3.63485e-09	7.90704e-10	6.5892e-11	0.000242323
1208	5.24811e-09	1.14164e-09	9.5137e-11	0.000349874
1209	3.04704e-09	6.62836e-10	5.52363e-11	0.000203136
1210	2.4131e-09	5.24932e-10	4.37443e-11	0.000160873
1211	2.70083e-09	5.87524e-10	4.89603e-11	0.000180056
1212	2.68658e-09	5.84424e-10	4.8702e-11	0.000179106
1213	1.73414e-09	3.77234e-10	3.14362e-11	0.000115609
1214	4.77593e-09	1.03893e-09	8.65773e-11	0.000318395
1215	2.18742e-09	4.75839e-10	3.96533e-11	0.000145828
1216	4.37766e-09	9.52291e-10	7.93576e-11	0.000291844
1217	2.11226e-09	4.59489e-10	3.82908e-11	0.000140818
1218	1.3524e-09	2.94193e-10	2.45161e-11	9.016e-05
1219	2.56055e-09	5.57007e-10	4.64172e-11	0.000170703
1220	5.45787e-09	1.18727e-09	9.89394e-11	0.000363858
1221	2.86851e-09	6.23999e-10	5.19999e-11	0.000191234
1222	3.03902e-09	6.61091e-10	5.5091e-11	0.000202601
1223	1.70665e-09	3.71255e-10	3.09379e-11	0.000113777
1224	3.3889e-09	7.37202e-10	6.14335e-11	0.000225927
1225	1.98788e-09	4.32433e-10	3.60361e-11	0.000132526
1226	2.35907e-09	5.13179e-10	4.27649e-11	0.000157272
1227	3.45595e-09	7.51787e-10	6.26489e-11	0.000230396
1228	5.00261e-09	1.08824e-09	9.06865e-11	0.000333507
1229	2.89698e-09	6.30193e-10	5.2516e-11	0.000193132
1230	2.70948e-09	5.89404e-10	4.9117e-11	0.000180632
1231	2.23869e-09	4.86991e-10	4.05826e-11	0.000149246
1232	3.04039e-09	6.61388e-10	5.51157e-11	0.000202692
1233	2.8591e-09	6.21951e-10	5.18293e-11	0.000190606
1234	2.14659e-09	4.66958e-10	3.89131e-11	0.000143106
1235	3.8659e-09	8.40966e-10	7.00805e-11	0.000257727
1236	3.49849e-09	7.61042e-10	6.34202e-11	0.000233233
1237	2.83725e-09	6.172e-10	5.14333e-11	0.00018915
1238	4.49427e-09	9.77659e-10	8.14716e-11	0.000299618
1239	2.57419e-09	5.59974e-10	4.66645e-11	0.000171613
1240	2.61111e-09	5.68005e-10	4.73338e-11	0.000174074
1241	3.8876e-09	8.45686e-10	7.04738e-11	0.000259173
1242	2.73415e-09	5.9477e-10	4.95642e-11	0.000182276
1243	2.1134e-09	4.59736e-10	3.83113e-11	0.000140893
1244	2.3845e-09	5.18711e-10	4.32259e-11	0.000158967
1245	5.72119e-09	1.24456e-09	1.03713e-10	0.000381413
1246	3.96447e-09	8.62407e-10	7.18672e-11	0.000264298
1247	2.67002e-09	5.8082e-10	4.84017e-11	0.000178001
1248	2.07157e-09	4.50638e-10	3.75532e-11	0.000138105
1249	2.88818e-09	6.28279e-10	5.23566e-11	0.000192546
1250	2.11347e-09	4.59752e-10	3.83127e-11	0.000140898
1251	4.35848e-09	9.48118e-10	7.90098e-11	0.000290565
1252	4.13533e-09	8.99575e-10	7.49646e-11	0.000275689
1253	4.24464e-09	9.23354e-10	7.69461e-11	0.000282976
1254	1.51419e-09	3.29389e-10	2.74491e-11	0.000100946
1255	4.00467e-09	8.71153e-10	7.25961e-11	0.000266978
1256	3.51155e-09	7.63883e-10	6.36569e-11	0.000234103
1257	2.93418e-09	6.38284e-10	5.31904e-11	0.000195612
1258	5.11042e-09	1.11169e-09	9.26409e-11	0.000340695
1259	4.39406e-09	9.55858e-10	7.96548e-11	0.000292937
1260	2.63932e-09	5.74142e-10	4.78451e-11	0.000175954
1261	3.04612e-09	6.62636e-10	5.52196e-11	0.000203075
1262	2.99629e-09	6.51795e-10	5.43162e-11	0.000199752
1263	4.91787e-09	1.06981e-09	8.91505e-11	0.000327858
1264	2.83853e-09	6.17478e-10	5.14565e-11	0.000189236
1265	3.49964e-09	7.61291e-10	6.3441e-11	0.000233309
1266	2.42318e-09	5.27125e-10	4.3927e-11	0.000161545
1267	5.20672e-09	1.13264e-09	9.43866e-11	0.000347114
1268	4.22962e-09	9.20086e-10	7.66739e-11	0.000281974
1269	1.74698e-09	3.80029e-10	3.16691e-11	0.000116466
1270	1.15857e-09	2.52028e-10	2.10024e-11	7.72379e-05
1271	3.61799e-09	7.87037e-10	6.55865e-11	0.0002412
1272	2.62757e-09	5.71587e-10	4.76323e-11	0.000175172
1273	1.87826e-09	4.08585e-10	3.40487e-11	0.000125217
1274	3.67197e-09	7.98779e-10	6.65649e-11	0.000244798
1275	3.69542e-09	8.0388e-10	6.699e-11	0.000246361
1276	2.12498e-09	4.62257e-10	3.85214e-11	0.000141666
1277	2.97553e-09	6.4728e-10	5.394e-11	0.000198369
1278	3.86554e-09	8.40887e-10	7.0074e-11	0.000257703
1279	2.51732e-09	5.47603e-10	4.56336e-11	0.000167821
1280	1.91219e-09	4.15968e-10	3.4664e-11	0.00012748
1281	2.54545e-09	5.53723e-10	4.61436e-11	0.000169697
1282	3.63658e-09	7.9108e-10	6.59234e-11	0.000242439
1283	5.89808e-09	1.28303e-09	1.06919e-10	0.000393205
1284	3.04474e-09	6.62335e-10	5.51946e-11	0.000202983
1285	2.77445e-09	6.03537e-10	5.02948e-11	0.000184963
1286	2.90206e-09	6.31297e-10	5.26081e-11	0.000193471
1287	2.8973e-09	6.30262e-10	5.25218e-11	0.000193153
1288	3.22316e-09	7.01148e-10	5.8429e-11	0.000214878
1289	1.03944e-09	2.26114e-10	1.88428e-11	6.92959e-05
1290	2.75284e-09	5.98836e-10	4.9903e-11	0.000183522
1291	2.45673e-09	5.34424e-10	4.45353e-11	0.000163782
1292	2.39671e-09	5.21367e-10	4.34473e-11	0.000159781
1293	2.41829e-09	5.26062e-10	4.38385e-11	0.00016122
1294	3.08944e-09	6.72058e-10	5.60049e-11	0.000205963
1295	4.329e-09	9.41706e-10	7.84755e-11	0.0002886
1296	2.44247e-09	5.3132e-10	4.42767e-11	0.000162831
1297	3.15268e-09	6.85815e-10	5.71512e-11	0.000210178
1298	2.28798e-09	4.97715e-10	4.14762e-11	0.000152532
1299	4.77696e-09	1.03915e-09	8.65961e-11	0.000318464
1300	2.27013e-09	4.93832e-10	4.11527e-11	0.000151342
1301	3.99616e-09	8.69302e-10	7.24418e-11	0.000266411
1302	4.38076e-09	9.52966e-10	7.94138e-11	0.000292051
1303	2.63639e-09	5.73506e-10	4.77922e-11	0.00017576
1304	3.91523e-09	8.51696e-10	7.09747e-11	0.000261015
1305	2.76238e-09	6.00913e-10	5.0076e-11	0.000184159
1306	2.73002e-09	5.93874e-10	4.94895e-11	0.000182002
1307	4.49457e-09	9.77722e-10	8.14768e-11	0.000299638
1308	2.65161e-09	5.76816e-10	4.8068e-11	0.000176774
1309	2.51665e-09	5.47457e-10	4.56215e-11	0.000167777
1310	4.04704e-09	8.80369e-10	7.33641e-11	0.000269803
1311	3.99344e-09	8.68711e-10	7.23926e-11	0.00026623
1312	2.98067e-09	6.48398e-10	5.40332e-11	0.000198712
1313	1.86329e-09	4.05329e-10	3.37775e-11	0.000124219
1314	2.75586e-09	5.99494e-10	4.99578e-11	0.000183724
1315	1.86797e-09	4.06347e-10	3.38622e-11	0.000124531
1316	1.86829e-09	4.06417e-10	3.38681e-11	0.000124553
1317	3.00872e-09	6.545e-10	5.45417e-11	0.000200582
1318	3.98572e-09	8.6703e-10	7.22525e-11	0.000265715
1319	3.06047e-09	6.65758e-10	5.54798e-11	0.000204032
1320	6.01574e-09	1.30863e-09	1.09052e-10	0.000401049
1321	1.75308e-09	3.81354e-10	3.17795e-11	0.000116872
1322	3.09971e-09	6.74293e-10	5.6191e-11	0.000206647
1323	3.94919e-09	8.59084e-10	7.15904e-11	0.000263279
1324	2.18892e-09	4.76165e-10	3.96805e-11	0.000145928
1325	5.0706e-09	1.10303e-09	9.19192e-11	0.00033804
1326	2.07135e-09	4.50589e-10	3.75491e-11	0.00013809
1327	4.28565e-09	9.32276e-10	7.76897e-11	0.00028571
1328	2.27382e-09	4.94635e-10	4.12196e-11	0.000151588
1329	4.57456e-09	9.95123e-10	8.29269e-11	0.000304971
1330	1.14019e-09	2.4803e-10	2.06692e-11	7.60126e-05
1331	2.94182e-09	6.39946e-10	5.33288e-11	0.000196121
1332	3.37995e-09	7.35256e-10	6.12713e-11	0.00022533
1333	3.66724e-09	7.9775e-10	6.64791e-11	0.000244482
1334	2.11069e-09	4.59148e-10	3.82623e-11	0.000140713
1335	5.27998e-09	1.14858e-09	9.57146e-11	0.000351998
1336	2.11226e-09	4.5949e-10	3.82908e-11	0.000140818
1337	1.38122e-09	3.00463e-10	2.50386e-11	9.20815e-05
1338	3.74794e-09	8.15305e-10	6.79421e-11	0.000249863
1339	2.50787e-09	5.45547e-10	4.54623e-11	0.000167191
1340	3.06595e-09	6.66948e-10	5.5579e-11	0.000204396
1341	1.97941e-09	4.3059e-10	3.58825e-11	0.000131961
1342	2.59684e-09	5.64902e-10	4.70752e-11	0.000173123
1343	3.30724e-09	7.19438e-10	5.99531e-11	0.000220483
1344	4.14007e-09	9.00606e-10	7.50505e-11	0.000276004
1345	1.26222e-09	2.74576e-10	2.28813e-11	8.41479e-05
1346	2.23688e-09	4.86597e-10	4.05498e-11	0.000149125
1347	5.10356e-09	1.1102e-09	9.25166e-11	0.000340237
1348	4.37354e-09	9.51395e-10	7.92829e-11	0.000291569
1349	3.3274e-09	7.23824e-10	6.03186e-11	0.000221827
1350	2.57498e-09	5.60147e-10	4.66789e-11	0.000171666
1351	2.41477e-09	5.25296e-10	4.37747e-11	0.000160985
1352	1.01569e-09	2.20948e-10	1.84123e-11	6.77128e-05
1353	2.60602e-09	5.66898e-10	4.72415e-11	0.000173735
1354	2.52862e-09	5.50061e-10	4.58384e-11	0.000168575
1355	3.91979e-09	8.52688e-10	7.10573e-11	0.000261319
1356	5.11514e-09	1.11272e-09	9.27265e-11	0.000341009
1357	3.47054e-09	7.54962e-10	6.29135e-11	0.000231369
1358	2.09583e-09	4.55914e-10	3.79928e-11	0.000139722
1359	2.0601e-09	4.48143e-10	3.73453e-11	0.00013734
1360	1.7346e-09	3.77336e-10	3.14447e-11	0.00011564
1361	3.16968e-09	6.89515e-10	5.74596e-11	0.000211312
1362	1.28866e-09	2.80328e-10	2.33607e-11	8.59109e-05
1363	3.52464e-09	7.66731e-10	6.38942e-11	0.000234976
1364	5.67699e-09	1.23494e-09	1.02912e-10	0.000378466
1365	3.11794e-09	6.78259e-10	5.65216e-11	0.000207863
1366	2.21504e-09	4.81847e-10	4.01539e-11	0.000147669
1367	1.44519e-09	3.14379e-10	2.61982e-11	9.63462e-05
1368	1.52695e-09	3.32164e-10	2.76803e-11	0.000101797
1369	3.09312e-09	6.72859e-10	5.60716e-11	0.000206208
1370	3.6833e-09	8.01243e-10	6.67703e-11	0.000245553
1371	1.03374e-09	2.24874e-10	1.87395e-11	6.89161e-05
1372	2.33668e-09	5.08309e-10	4.23591e-11	0.000155779
1373	3.08788e-09	6.7172e-10	5.59767e-11	0.000205859
1374	3.38768e-09	7.36937e-10	6.14114e-11	0.000225845
1375	2.15239e-09	4.68218e-10	3.90182e-11	0.000143493
1376	2.69648e-09	5.86577e-10	4.88814e-11	0.000179765
1377	3.59136e-09	7.81244e-10	6.51037e-11	0.000239424
1378	3.08336e-09	6.70736e-10	5.58946e-11	0.000205557
1379	2.7254e-09	5.92869e-10	4.94057e-11	0.000181694
1380	3.77367e-09	8.20903e-10	6.84086e-11	0.000251578
1381	2.97422e-09	6.46995e-10	5.39163e-11	0.000198282
1382	3.02477e-09	6.57992e-10	5.48326e-11	0.000201651
1383	1.89577e-09	4.12395e-10	3.43663e-11	0.000126385
1384	1.86299e-09	4.05264e-10	3.3772e-11	0.000124199
1385	2.26409e-09	4.92517e-10	4.10431e-11	0.000150939
1386	3.33695e-09	7.25902e-10	6.04918e-11	0.000222464
1387	2.63984e-09	5.74255e-10	4.78546e-11	0.000175989
1388	1.45729e-09	3.1701e-10	2.64175e-11	9.71526e-05
1389	4.39685e-09	9.56465e-10	7.97054e-11	0.000293123
1390	3.55998e-09	7.74418e-10	6.45348e-11	0.000237332
1391	1.65878e-09	3.60841e-10	3.00701e-11	0.000110585
1392	3.54537e-09	7.71239e-10	6.42699e-11	0.000236358
1393	3.61536e-09	7.86464e-10	6.55387e-11	0.000241024
1394	2.73908e-09	5.95843e-10	4.96536e-11	0.000182605
1395	4.37646e-09	9.52029e-10	7.93358e-11	0.000291764
1396	2.87545e-09	6.25508e-10	5.21257e-11	0.000191696
1397	2.37271e-09	5.16147e-10	4.30122e-11	0.000158181
1398	3.16937e-09	6.89447e-10	5.74539e-11	0.000211291
1399	3.33847e-09	7.26231e-10	6.05193e-11	0.000222565
1400	2.98125e-09	6.48524e-10	5.40436e-11	0.00019875
1401	4.22195e-09	9.18418e-10	7.65348e-11	0.000281463
1402	3.03824e-09	6.6092e-10	5.50767e-11	0.000202549
1403	1.68912e-09	3.67441e-10	3.062e-11	0.000112608
1404	1.86438e-09	4.05567e-10	3.37972e-11	0.000124292
1405	3.44464e-09	7.49328e-10	6.2444e-11	0.000229643
1406	3.81623e-09	8.30161e-10	6.91801e-11	0.000254415
1407	3.60041e-09	7.83213e-10	6.52678e-11	0.000240028
1408	1.57785e-09	3.43237e-10	2.86031e-11	0.00010519
1409	1.48613e-09	3.23283e-10	2.69403e-11	9.9075e-05
1410	1.52482e-09	3.31701e-10	2.76418e-11	0.000101655
1411	4.34138e-09	9.44399e-10	7.86999e-11	0.000289425
1412	4.37248e-09	9.51164e-10	7.92637e-11	0.000291499
1413	2.49882e-09	5.4358e-10	4.52983e-11	0.000166588
1414	4.46463e-09	9.71211e-10	8.09342e-11	0.000297642
1415	2.14496e-09	4.66603e-10	3.88836e-11	0.000142997
1416	1.8828e-09	4.09573e-10	3.41311e-11	0.00012552
1417	2.60429e-09	5.66522e-10	4.72101e-11	0.000173619
1418	2.01725e-09	4.38822e-10	3.65685e-11	0.000134484
1419	1.62927e-09	3.54421e-10	2.95351e-11	0.000108618
1420	3.77228e-09	8.20599e-10	6.83833e-11	0.000251485
1421	3.82086e-09	8.31167e-10	6.92639e-11	0.000254724
1422	3.08021e-09	6.70051e-10	5.58376e-11	0.000205347
1423	3.86387e-09	8.40524e-10	7.00437e-11	0.000257591
1424	3.38319e-09	7.35959e-10	6.13299e-11	0.000225546
1425	2.83548e-09	6.16815e-10	5.14012e-11	0.000189032
1426	3.17427e-09	6.90512e-10	5.75426e-11	0.000211618
1427	2.35197e-09	5.11633e-10	4.26361e-11	0.000156798
1428	3.97934e-09	8.65642e-10	7.21368e-11	0.000265289
1429	3.54082e-09	7.7025e-10	6.41875e-11	0.000236055
1430	6.21297e-09	1.35153e-09	1.12628e-10	0.000414198
1431	3.42917e-09	7.45962e-10	6.21635e-11	0.000228611
1432	4.0308e-09	8.76838e-10	7.30698e-11	0.00026872
1433	3.16627e-09	6.88773e-10	5.73977e-11	0.000211085
1434	2.88903e-09	6.28462e-10	5.23718e-11	0.000192602
1435	3.33239e-09	7.24909e-10	6.04091e-11	0.000222159
1436	1.44572e-09	3.14494e-10	2.62079e-11	9.63815e-05
1437	3.43314e-09	7.46825e-10	6.22354e-11	0.000228876
1438	2.41881e-09	5.26175e-10	4.38479e-11	0.000161254
1439	2.0039e-09	4.35918e-10	3.63265e-11	0.000133594
1440	3.95298e-09	8.59909e-10	7.16591e-11	0.000263532
1441	2.2226e-09	4.83492e-10	4.0291e-11	0.000148174
1442	1.55881e-09	3.39094e-10	2.82579e-11	0.000103921
1443	3.04051e-09	6.61415e-10	5.51179e-11	0.000202701
1444	6.07563e-09	1.32166e-09	1.10138e-10	0.000405042
1445	3.29365e-09	7.16483e-10	5.97069e-11	0.000219577
1446	4.43667e-09	9.65129e-10	8.04274e-11	0.000295778
1447	4.41317e-09	9.60016e-10	8.00013e-11	0.000294211
1448	2.4552e-09	5.34091e-10	4.45076e-11	0.00016368
1449	1.83481e-09	3.99135e-10	3.32612e-11	0.000122321
1450	2.26877e-09	4.93534e-10	4.11279e-11	0.000151251
1451	2.87556e-09	6.25534e-10	5.21278e-11	0.000191704
1452	8.61059e-09	1.8731e-09	1.56091e-10	0.000574039
1453	1.51438e-09	3.29429e-10	2.74524e-11	0.000100959
1454	2.93689e-09	6.38874e-10	5.32395e-11	0.000195793
1455	3.89549e-09	8.47403e-10	7.0617e-11	0.0002597
1456	1.46915e-09	3.19591e-10	2.66326e-11	9.79434e-05
1457	2.75382e-09	5.99049e-10	4.99208e-11	0.000183588
1458	2.94823e-09	6.4134e-10	5.3445e-11	0.000196548
1459	2.35526e-09	5.12349e-10	4.26957e-11	0.000157017
1460	2.48316e-09	5.40173e-10	4.50144e-11	0.000165544
1461	3.7456e-09	8.14796e-10	6.78996e-11	0.000249706
1462	1.54803e-09	3.36749e-10	2.80625e-11	0.000103202
1463	2.71178e-09	5.89905e-10	4.91587e-11	0.000180785
1464	1.73825e-09	3.78128e-10	3.15107e-11	0.000115883
1465	2.31797e-09	5.04237e-10	4.20197e-11	0.000154531
1466	3.89228e-09	8.46704e-10	7.05587e-11	0.000259485
1467	4.45887e-09	9.69957e-10	8.08297e-11	0.000297258
1468	1.60658e-09	3.49486e-10	2.91238e-11	0.000107105
1469	3.63969e-09	7.91758e-10	6.59798e-11	0.000242646
1470	4.07711e-09	8.86911e-10	7.39093e-11	0.000271807
1471	2.70844e-09	5.89178e-10	4.90982e-11	0.000180563
1472	2.63829e-09	5.73918e-10	4.78265e-11	0.000175886
1473	8.11021e-10	1.76425e-10	1.47021e-11	5.4068e-05
1474	3.40006e-09	7.39629e-10	6.16358e-11	0.000226671
1475	5.99394e-09	1.30389e-09	1.08657e-10	0.000399596
1476	1.54703e-09	3.36532e-10	2.80444e-11	0.000103135
1477	1.66308e-09	3.61777e-10	3.01481e-11	0.000110872
1478	4.01629e-09	8.7368e-10	7.28066e-11	0.000267752
1479	2.45523e-09	5.34096e-10	4.4508e-11	0.000163682
1480	4.16426e-09	9.05869e-10	7.5489e-11	0.000277617
1481	2.31979e-09	5.04634e-10	4.20529e-11	0.000154653
1482	3.32676e-09	7.23684e-10	6.0307e-11	0.000221784
1483	3.72719e-09	8.10792e-10	6.7566e-11	0.000248479
1484	2.22746e-09	4.84548e-10	4.0379e-11	0.000148497
1485	2.9012e-09	6.31111e-10	5.25926e-11	0.000193414
1486	3.25488e-09	7.08048e-10	5.9004e-11	0.000216992
1487	2.93904e-09	6.39342e-10	5.32785e-11	0.000195936
1488	1.33901e-09	2.91281e-10	2.42734e-11	8.92674e-05
1489	5.03918e-09	1.0962e-09	9.13496e-11	0.000335946
1490	2.08303e-09	4.53131e-10	3.77609e-11	0.000138869
1491	1.57727e-09	3.43111e-10	2.85926e-11	0.000105152
1492	3.43838e-09	7.47965e-10	6.23304e-11	0.000229225
1493	1.56483e-09	3.40405e-10	2.83671e-11	0.000104322
1494	1.76714e-09	3.84414e-10	3.20345e-11	0.00011781
1495	1.51606e-09	3.29794e-10	2.74829e-11	0.00010107
1496	2.85989e-09	6.22123e-10	5.18436e-11	0.000190659
1497	1.93224e-09	4.20329e-10	3.50274e-11	0.000128816
1498	8.44404e-10	1.83687e-10	1.53072e-11	5.62936e-05
1499	1.12868e-09	2.45526e-10	2.04605e-11	7.52452e-05
1500	5.2859e-09	1.14986e-09	9.5822e-11	0.000352393
1501	4.99783e-09	1.0872e-09	9.05999e-11	0.000333189
1502	2.75403e-09	5.99095e-10	4.99246e-11	0.000183602
1503	1.9953e-09	4.34046e-10	3.61705e-11	0.00013302
1504	7.6453e-09	1.66311e-09	1.38593e-10	0.000509686
1505	2.70367e-09	5.88141e-10	4.90118e-11	0.000180245
1506	3.12736e-09	6.80309e-10	5.66924e-11	0.000208491
1507	2.57619e-09	5.6041e-10	4.67008e-11	0.000171746
1508	3.06342e-09	6.664e-10	5.55333e-11	0.000204228
1509	4.63821e-09	1.00897e-09	8.40808e-11	0.000309214
1510	1.39873e-09	3.04273e-10	2.5356e-11	9.32489e-05
1511	3.33952e-09	7.26459e-10	6.05383e-11	0.000222634
1512	2.56957e-09	5.58969e-10	4.65808e-11	0.000171305
1513	1.98715e-09	4.32273e-10	3.60228e-11	0.000132477
1514	2.55223e-09	5.55197e-10	4.62664e-11	0.000170149
1515	4.01571e-09	8.73555e-10	7.27962e-11	0.000267714
1516	2.30407e-09	5.01214e-10	4.17678e-11	0.000153604
1517	3.61474e-09	7.86329e-10	6.55274e-11	0.000240983
1518	3.07351e-09	6.68593e-10	5.57161e-11	0.0002049
1519	2.34083e-09	5.0921e-10	4.24342e-11	0.000156055
1520	1.82925e-09	3.97924e-10	3.31604e-11	0.00012195
1521	1.84168e-09	4.00629e-10	3.33857e-11	0.000122779
1522	2.62261e-09	5.70507e-10	4.75423e-11	0.000174841
1523	1.35284e-09	2.94289e-10	2.45241e-11	9.01893e-05
1524	3.04517e-09	6.62428e-10	5.52023e-11	0.000203011
1525	1.29611e-09	2.81949e-10	2.34957e-11	8.64074e-05
1526	2.33173e-09	5.07231e-10	4.22693e-11	0.000155449
1527	3.01605e-09	6.56095e-10	5.46746e-11	0.00020107
1528	2.39436e-09	5.20855e-10	4.34046e-11	0.000159624
1529	1.66838e-09	3.6293e-10	3.02442e-11	0.000111225
1530	2.23408e-09	4.85988e-10	4.0499e-11	0.000148938
1531	2.55891e-09	5.5665e-10	4.63875e-11	0.000170594
1532	1.61957e-09	3.52312e-10	2.93593e-11	0.000107971
1533	3.97276e-09	8.64212e-10	7.20177e-11	0.000264851
1534	3.10741e-09	6.75967e-10	5.63306e-11	0.00020716
1535	3.4455e-09	7.49515e-10	6.24596e-11	0.0002297
1536	2.35345e-09	5.11957e-10	4.26631e-11	0.000156897
1537	2.22919e-09	4.84926e-10	4.04105e-11	0.000148613
1538	2.89791e-09	6.30395e-10	5.25329e-11	0.000193194
1539	3.03063e-09	6.59265e-10	5.49387e-11	0.000202042
1540	6.40009e-09	1.39224e-09	1.1602e-10	0.000426672
1541	1.99827e-09	4.34692e-10	3.62243e-11	0.000133218
1542	2.68004e-09	5.83e-10	4.85833e-11	0.000178669
1543	4.91043e-09	1.06819e-09	8.90155e-11	0.000327362
1544	2.07934e-09	4.52327e-10	3.76939e-11	0.000138622
1545	3.16948e-09	6.89471e-10	5.74559e-11	0.000211299
1546	1.70415e-09	3.70712e-10	3.08926e-11	0.00011361
1547	1.38888e-09	3.02128e-10	2.51773e-11	9.25917e-05
1548	2.21198e-09	4.81182e-10	4.00985e-11	0.000147465
1549	2.38758e-09	5.19381e-10	4.32817e-11	0.000159172
1550	2.31965e-09	5.04604e-10	4.20503e-11	0.000154644
1551	1.18646e-09	2.58095e-10	2.15079e-11	7.90972e-05
1552	1.214e-09	2.64086e-10	2.20072e-11	8.09332e-05
1553	2.87334e-09	6.2505e-10	5.20875e-11	0.000191556
1554	5.22958e-09	1.13761e-09	9.48011e-11	0.000348639
1555	6.28101e-09	1.36633e-09	1.13861e-10	0.000418734
1556	2.32953e-09	5.06753e-10	4.22294e-11	0.000155302
1557	1.82796e-09	3.97644e-10	3.3137e-11	0.000121864
1558	5.34218e-09	1.16211e-09	9.68422e-11	0.000356145
1559	5.83358e-09	1.269e-09	1.0575e-10	0.000388905
1560	4.03388e-09	8.77507e-10	7.31256e-11	0.000268925
1561	3.08995e-09	6.72171e-10	5.60142e-11	0.000205997
1562	3.2829e-09	7.14142e-10	5.95118e-11	0.00021886
1563	2.39259e-09	5.2047e-10	4.33725e-11	0.000159506
1564	2.95594e-09	6.43019e-10	5.35849e-11	0.000197063
1565	4.60254e-09	1.00121e-09	8.34341e-11	0.000306836
1566	3.52028e-09	7.65781e-10	6.38151e-11	0.000234685
1567	2.88968e-09	6.28603e-10	5.23836e-11	0.000192645
1568	2.7665e-09	6.01809e-10	5.01507e-11	0.000184433
1569	1.24543e-09	2.70924e-10	2.2577e-11	8.30288e-05
1570	2.24755e-09	4.8892e-10	4.07433e-11	0.000149837
1571	3.83424e-09	8.34078e-10	6.95065e-11	0.000255616
1572	1.86729e-09	4.062e-10	3.385e-11	0.000124486
1573	3.78326e-09	8.22989e-10	6.85824e-11	0.000252217
1574	2.29997e-09	5.00322e-10	4.16935e-11	0.000153331
1575	1.78724e-09	3.88787e-10	3.23989e-11	0.00011915
1576	5.93316e-09	1.29067e-09	1.07555e-10	0.000395544
1577	2.78208e-09	6.05197e-10	5.04331e-11	0.000185472
1578	2.02804e-09	4.41169e-10	3.67641e-11	0.000135203
1579	2.5162e-09	5.47359e-10	4.56133e-11	0.000167746
1580	2.03409e-09	4.42485e-10	3.68738e-11	0.000135606
1581	2.81808e-09	6.13029e-10	5.10858e-11	0.000187872
1582	5.31181e-09	1.1555e-09	9.62917e-11	0.000354121
1583	3.83328e-09	8.3387e-10	6.94892e-11	0.000255552
1584	2.28666e-09	4.97427e-10	4.14523e-11	0.000152444
1585	3.85065e-09	8.37648e-10	6.9804e-11	0.00025671
1586	5.52861e-09	1.20266e-09	1.00222e-10	0.000368574
1587	4.26036e-09	9.26774e-10	7.72312e-11	0.000284024
1588	4.40135e-09	9.57444e-10	7.9787e-11	0.000293423
1589	5.43967e-09	1.18331e-09	9.86096e-11	0.000362645
1590	2.4418e-09	5.31176e-10	4.42646e-11	0.000162787
1591	3.99281e-09	8.68573e-10	7.2381e-11	0.000266187
1592	2.20837e-09	4.80396e-10	4.0033e-11	0.000147225
1593	2.84325e-09	6.18505e-10	5.15421e-11	0.00018955
1594	1.29453e-09	2.81604e-10	2.3467e-11	8.63019e-05
1595	2.92453e-09	6.36186e-10	5.30155e-11	0.000194969
1596	2.90529e-09	6.31999e-10	5.26666e-11	0.000193686
1597	3.19106e-09	6.94166e-10	5.78471e-11	0.000212738
1598	3.59272e-09	7.81539e-10	6.51283e-11	0.000239515
1599	2.9269e-09	6.36702e-10	5.30585e-11	0.000195127
1600	4.26778e-09	9.28388e-10	7.73657e-11	0.000284519
1601	3.2263e-09	7.01831e-10	5.84859e-11	0.000215087
1602	4.05437e-09	8.81965e-10	7.34971e-11	0.000270292
1603	3.56334e-09	7.75148e-10	6.45957e-11	0.000237556
1604	2.98189e-09	6.48664e-10	5.40553e-11	0.000198793
1605	3.38709e-09	7.36808e-10	6.14006e-11	0.000225806
1606	1.84042e-09	4.00354e-10	3.33629e-11	0.000122695
1607	3.80413e-09	8.27528e-10	6.89607e-11	0.000253609
1608	1.94962e-09	4.24109e-10	3.53424e-11	0.000129975
1609	3.51951e-09	7.65613e-10	6.38011e-11	0.000234634
1610	4.44587e-09	9.67129e-10	8.05941e-11	0.000296391
1611	2.21895e-09	4.82698e-10	4.02248e-11	0.00014793
1612	3.15828e-09	6.87034e-10	5.72529e-11	0.000210552
1613	4.17794e-09	9.08846e-10	7.57372e-11	0.00027853
1614	2.77516e-09	6.03693e-10	5.03077e-11	0.000185011
1615	2.70312e-09	5.88022e-10	4.90018e-11	0.000180208
1616	2.57642e-09	5.60459e-10	4.67049e-11	0.000171761
1617	5.5375e-09	1.2046e-09	1.00383e-10	0.000369166
1618	2.18065e-09	4.74365e-10	3.95304e-11	0.000145376
1619	3.36787e-09	7.32628e-10	6.10523e-11	0.000224525
1620	3.04411e-09	6.62198e-10	5.51832e-11	0.000202941
1621	1.84923e-09	4.0227e-10	3.35225e-11	0.000123282
1622	3.88453e-09	8.45018e-10	7.04181e-11	0.000258968
1623	3.87683e-09	8.43344e-10	7.02787e-11	0.000258456
1624	1.47168e-09	3.20141e-10	2.66784e-11	9.8112e-05
1625	5.08639e-09	1.10646e-09	9.22054e-11	0.000339093
1626	3.88167e-09	8.44396e-10	7.03663e-11	0.000258778
1627	4.90188e-09	1.06633e-09	8.88605e-11	0.000326792
1628	1.47346e-09	3.20529e-10	2.67107e-11	9.82309e-05
1629	5.93048e-09	1.29008e-09	1.07507e-10	0.000395366
1630	1.65149e-09	3.59255e-10	2.99379e-11	0.000110099
1631	5.23776e-09	1.13939e-09	9.49494e-11	0.000349184
1632	4.11577e-09	8.9532e-10	7.461e-11	0.000274384
1633	2.11942e-09	4.61046e-10	3.84205e-11	0.000141294
1634	2.9561e-09	6.43052e-10	5.35877e-11	0.000197073
1635	4.87698e-09	1.06091e-09	8.84091e-11	0.000325132
1636	1.82671e-09	3.97373e-10	3.31144e-11	0.000121781
1637	3.53829e-09	7.69698e-10	6.41415e-11	0.000235886
1638	1.76495e-09	3.83936e-10	3.19947e-11	0.000117663
1639	5.23026e-09	1.13776e-09	9.48135e-11	0.000348684
1640	1.17752e-09	2.56152e-10	2.1346e-11	7.85016e-05
1641	2.79321e-09	6.07619e-10	5.06349e-11	0.000186214
1642	1.59662e-09	3.4732e-10	2.89434e-11	0.000106442
1643	6.27139e-09	1.36424e-09	1.13687e-10	0.000418093
1644	3.39047e-09	7.37544e-10	6.1462e-11	0.000226032
1645	1.21743e-09	2.64834e-10	2.20695e-11	8.11622e-05
1646	2.34569e-09	5.10269e-10	4.25224e-11	0.00015638
1647	2.09074e-09	4.54807e-10	3.79006e-11	0.000139383
1648	2.33842e-09	5.08686e-10	4.23905e-11	0.000155895
1649	3.02126e-09	6.57227e-10	5.47689e-11	0.000201417
1650	4.37849e-09	9.52472e-10	7.93726e-11	0.000291899
1651	3.80585e-09	8.27904e-10	6.8992e-11	0.000253724
1652	3.76769e-09	8.19602e-10	6.83001e-11	0.000251179
1653	2.09112e-09	4.5489e-10	3.79075e-11	0.000139408
1654	6.28775e-09	1.3678e-09	1.13983e-10	0.000419184
1655	3.12131e-09	6.78992e-10	5.65827e-11	0.000208087
1656	3.71702e-09	8.08578e-10	6.73815e-11	0.000247801
1657	3.83231e-09	8.33659e-10	6.94716e-11	0.000255488
1658	2.62971e-09	5.72052e-10	4.7671e-11	0.000175314
1659	2.29205e-09	4.98599e-10	4.15499e-11	0.000152803
1660	1.62643e-09	3.53805e-10	2.94837e-11	0.000108429
1661	4.25107e-09	9.24754e-10	7.70628e-11	0.000283405
1662	7.55518e-09	1.64351e-09	1.36959e-10	0.000503679
1663	2.75126e-09	5.98494e-10	4.98745e-11	0.000183417
1664	3.10917e-09	6.76352e-10	5.63627e-11	0.000207278
1665	1.89667e-09	4.1259e-10	3.43825e-11	0.000126444
1666	2.71714e-09	5.9107e-10	4.92559e-11	0.000181142
1667	3.03258e-09	6.59689e-10	5.49741e-11	0.000202172
1668	2.75787e-09	5.99932e-10	4.99943e-11	0.000183858
1669	6.96911e-09	1.51602e-09	1.26335e-10	0.000464607
1670	2.76152e-09	6.00724e-10	5.00604e-11	0.000184101
1671	1.97183e-09	4.2894e-10	3.5745e-11	0.000131455
1672	2.7489e-09	5.97979e-10	4.98316e-11	0.00018326
1673	1.03192e-09	2.24478e-10	1.87065e-11	6.87945e-05
1674	2.96157e-09	6.44243e-10	5.36869e-11	0.000197438
1675	1.74032e-09	3.7858e-10	3.15483e-11	0.000116021
1676	2.04438e-09	4.44723e-10	3.70603e-11	0.000136292
1677	2.82335e-09	6.14176e-10	5.11813e-11	0.000188224
1678	3.10921e-09	6.76359e-10	5.63632e-11	0.00020728
1679	3.07751e-09	6.69464e-10	5.57886e-11	0.000205167
1680	4.88154e-09	1.0619e-09	8.84919e-11	0.000325436
1681	3.92123e-09	8.53002e-10	7.10835e-11	0.000261415
1682	2.20696e-09	4.8009e-10	4.00075e-11	0.000147131
1683	3.36809e-09	7.32676e-10	6.10563e-11	0.00022454
1684	2.70984e-09	5.89483e-10	4.91235e-11	0.000180656
1685	2.40814e-09	5.23852e-10	4.36544e-11	0.000160542
1686	6.09827e-09	1.32658e-09	1.10548e-10	0.000406551
1687	2.12499e-09	4.62259e-10	3.85216e-11	0.000141666
1688	2.84941e-09	6.19844e-10	5.16537e-11	0.000189961
1689	1.91098e-09	4.15703e-10	3.46419e-11	0.000127398
1690	2.52456e-09	5.49179e-10	4.57649e-11	0.000168304
1691	2.97868e-09	6.47965e-10	5.39971e-11	0.000198579
1692	5.06059e-09	1.10085e-09	9.17377e-11	0.000337373
1693	4.23527e-09	9.21317e-10	7.67764e-11	0.000282352
1694	3.63154e-09	7.89983e-10	6.58319e-11	0.000242102
1695	1.52017e-09	3.30689e-10	2.75575e-11	0.000101345
1696	3.33374e-09	7.25202e-10	6.04335e-11	0.000222249
1697	1.97222e-09	4.29025e-10	3.57521e-11	0.000131481
1698	3.4718e-09	7.55236e-10	6.29363e-11	0.000231454
1699	4.22477e-09	9.19032e-10	7.6586e-11	0.000281651
1700	2.72619e-09	5.93041e-10	4.942e-11	0.000181746
1701	3.09179e-09	6.7257e-10	5.60475e-11	0.000206119
1702	3.65194e-09	7.94423e-10	6.62019e-11	0.000243463
1703	2.8463e-09	6.19167e-10	5.15972e-11	0.000189753
1704	6.13712e-09	1.33503e-09	1.11253e-10	0.000409141
1705	1.87989e-09	4.0894e-10	3.40783e-11	0.000125326
1706	4.36302e-09	9.49106e-10	7.90922e-11	0.000290868
1707	2.1579e-09	4.69416e-10	3.9118e-11	0.00014386
1708	4.38302e-09	9.53456e-10	7.94547e-11	0.000292201
1709	1.88352e-09	4.0973e-10	3.41441e-11	0.000125568
1710	3.83172e-09	8.33531e-10	6.9461e-11	0.000255448
1711	2.45348e-09	5.33716e-10	4.44763e-11	0.000163565
1712	2.79399e-09	6.07789e-10	5.06491e-11	0.000186266
1713	3.04033e-09	6.61375e-10	5.51146e-11	0.000202689
1714	5.00601e-09	1.08898e-09	9.07482e-11	0.000333734
1715	5.79991e-09	1.26168e-09	1.0514e-10	0.000386661
1716	3.99084e-09	8.68145e-10	7.23454e-11	0.000266056
1717	2.80098e-09	6.09309e-10	5.07757e-11	0.000186732
1718	2.3131e-09	5.03178e-10	4.19315e-11	0.000154206
1719	3.60006e-09	7.83136e-10	6.52613e-11	0.000240004
1720	5.7524e-09	1.25134e-09	1.04279e-10	0.000383493
1721	3.27497e-09	7.12418e-10	5.93682e-11	0.000218331
1722	4.25393e-09	9.25376e-10	7.71147e-11	0.000283596
1723	1.73729e-09	3.77921e-10	3.14934e-11	0.00011582
1724	3.31204e-09	7.20481e-10	6.00401e-11	0.000220802
1725	1.31532e-09	2.86126e-10	2.38439e-11	8.76877e-05
1726	3.82381e-09	8.31809e-10	6.93174e-11	0.000254921
1727	2.95737e-09	6.4333e-10	5.36108e-11	0.000197158
1728	2.16314e-09	4.70557e-10	3.9213e-11	0.000144209
1729	3.95558e-09	8.60474e-10	7.17062e-11	0.000263705
1730	3.73616e-09	8.12743e-10	6.77286e-11	0.000249077
1731	4.05983e-09	8.83151e-10	7.35959e-11	0.000270655
1732	2.5591e-09	5.56693e-10	4.63911e-11	0.000170607
1733	2.79609e-09	6.08246e-10	5.06872e-11	0.000186406
1734	2.2009e-09	4.7877e-10	3.98975e-11	0.000146726
1735	4.22687e-09	9.1949e-10	7.66242e-11	0.000281792
1736	3.91364e-09	8.51352e-10	7.0946e-11	0.00026091
1737	3.61933e-09	7.87327e-10	6.56106e-11	0.000241288
1738	4.36712e-09	9.49998e-10	7.91665e-11	0.000291141
1739	3.9835e-09	8.66548e-10	7.22123e-11	0.000265567
1740	3.1207e-09	6.7886e-10	5.65716e-11	0.000208047
1741	1.7524e-09	3.81207e-10	3.17672e-11	0.000116827
1742	2.0669e-09	4.49622e-10	3.74685e-11	0.000137794
1743	1.88635e-09	4.10346e-10	3.41955e-11	0.000125757
1744	2.84104e-09	6.18024e-10	5.1502e-11	0.000189403
1745	3.18199e-09	6.92191e-10	5.76826e-11	0.000212133
1746	3.41371e-09	7.42599e-10	6.18832e-11	0.000227581
1747	4.66235e-09	1.01422e-09	8.45184e-11	0.000310823
1748	1.72628e-09	3.75525e-10	3.12938e-11	0.000115085
1749	1.11446e-09	2.42432e-10	2.02027e-11	7.4297e-05
1750	4.29643e-09	9.34621e-10	7.7885e-11	0.000286429
1751	2.29449e-09	4.9913e-10	4.15942e-11	0.000152966
1752	1.20257e-09	2.616e-10	2.18e-11	8.01712e-05
1753	3.54278e-09	7.70676e-10	6.4223e-11	0.000236185
1754	2.56067e-09	5.57032e-10	4.64194e-11	0.000170711
1755	1.16267e-09	2.52921e-10	2.10767e-11	7.75114e-05
1756	1.58616e-09	3.45045e-10	2.87538e-11	0.000105744
1757	2.01187e-09	4.3765e-10	3.64709e-11	0.000134125
1758	4.01045e-09	8.7241e-10	7.27008e-11	0.000267363
1759	9.70726e-10	2.11166e-10	1.75972e-11	6.4715e-05
1760	2.88612e-09	6.27829e-10	5.23191e-11	0.000192408
1761	3.46578e-09	7.53926e-10	6.28272e-11	0.000231052
1762	2.93182e-09	6.37771e-10	5.31476e-11	0.000195455
1763	5.10651e-09	1.11084e-09	9.25701e-11	0.000340434
1764	6.07196e-09	1.32086e-09	1.10072e-10	0.000404797
1765	2.27893e-09	4.95746e-10	4.13121e-11	0.000151929
1766	4.40871e-09	9.59044e-10	7.99204e-11	0.000293914
1767	2.57071e-09	5.59218e-10	4.66015e-11	0.000171381
1768	4.41223e-09	9.59811e-10	7.99842e-11	0.000294149
1769	3.87929e-09	8.43879e-10	7.03232e-11	0.000258619
1770	2.11866e-09	4.60881e-10	3.84068e-11	0.000141244
1771	3.96258e-09	8.61998e-10	7.18332e-11	0.000264172
1772	2.13557e-09	4.6456e-10	3.87133e-11	0.000142371
1773	2.58721e-09	5.62808e-10	4.69006e-11	0.000172481
1774	3.14712e-09	6.84606e-10	5.70505e-11	0.000209808
1775	2.64722e-09	5.7586e-10	4.79884e-11	0.000176481
1776	1.9415e-09	4.22343e-10	3.51952e-11	0.000129433
1777	3.3256e-09	7.23433e-10	6.02861e-11	0.000221707
1778	6.71276e-09	1.46026e-09	1.21688e-10	0.000447517
1779	2.86353e-09	6.22917e-10	5.19097e-11	0.000190902
1780	1.51017e-09	3.28514e-10	2.73762e-11	0.000100678
1781	2.44392e-09	5.31635e-10	4.43029e-11	0.000162928
1782	3.365e-09	7.32002e-10	6.10002e-11	0.000224333
1783	6.63434e-09	1.4432e-09	1.20266e-10	0.000442289
1784	3.57279e-09	7.77204e-10	6.4767e-11	0.000238186
1785	2.15279e-09	4.68306e-10	3.90255e-11	0.000143519
1786	1.52674e-09	3.32118e-10	2.76765e-11	0.000101783
1787	6.32948e-09	1.37688e-09	1.1474e-10	0.000421965
1788	4.14234e-09	9.01101e-10	7.50917e-11	0.000276156
1789	1.97134e-09	4.28833e-10	3.57361e-11	0.000131422
1790	2.32617e-09	5.06021e-10	4.21684e-11	0.000155078
1791	2.13173e-09	4.63725e-10	3.86438e-11	0.000142116
1792	2.0269e-09	4.40919e-10	3.67433e-11	0.000135126
1793	3.07482e-09	6.68879e-10	5.574e-11	0.000204988
1794	3.93781e-09	8.56608e-10	7.1384e-11	0.000262521
1795	2.52371e-09	5.48992e-10	4.57494e-11	0.000168247
1796	4.09548e-09	8.90908e-10	7.42423e-11	0.000273032
1797	2.92399e-09	6.36068e-10	5.30057e-11	0.000194933
1798	2.58175e-09	5.61619e-10	4.68016e-11	0.000172117
1799	3.96487e-09	8.62494e-10	7.18745e-11	0.000264324
1800	5.38151e-09	1.17066e-09	9.75552e-11	0.000358767
1801	2.23211e-09	4.85561e-10	4.04634e-11	0.000148807
1802	4.6574e-09	1.01314e-09	8.44286e-11	0.000310493
1803	1.9195e-09	4.17557e-10	3.47964e-11	0.000127967
1804	2.4632e-09	5.35829e-10	4.46525e-11	0.000164213
1805	1.54255e-09	3.35558e-10	2.79632e-11	0.000102837
1806	2.64392e-09	5.75144e-10	4.79287e-11	0.000176262
1807	4.70649e-09	1.02382e-09	8.53185e-11	0.000313766
1808	1.94522e-09	4.23151e-10	3.52626e-11	0.000129681
1809	2.36103e-09	5.13605e-10	4.28004e-11	0.000157402
1810	2.18137e-09	4.74523e-10	3.95436e-11	0.000145425
1811	1.82101e-09	3.96131e-10	3.30109e-11	0.0001214
1812	4.2481e-09	9.24106e-10	7.70089e-11	0.000283206
1813	3.03544e-09	6.60313e-10	5.50261e-11	0.000202363
1814	2.95959e-09	6.43812e-10	5.3651e-11	0.000197306
1815	3.41364e-09	7.42584e-10	6.1882e-11	0.000227576
1816	2.99276e-09	6.51028e-10	5.42523e-11	0.000199517
1817	4.87254e-09	1.05994e-09	8.83287e-11	0.000324836
1818	3.25566e-09	7.08218e-10	5.90182e-11	0.000217044
1819	7.74802e-09	1.68546e-09	1.40455e-10	0.000516535
1820	2.20644e-09	4.79976e-10	3.9998e-11	0.000147096
1821	4.1504e-09	9.02855e-10	7.52379e-11	0.000276694
1822	4.47016e-09	9.72412e-10	8.10343e-11	0.00029801
1823	2.05792e-09	4.47667e-10	3.73056e-11	0.000137194
1824	2.93235e-09	6.37886e-10	5.31572e-11	0.00019549
1825	1.95553e-09	4.25394e-10	3.54495e-11	0.000130369
1826	1.76504e-09	3.83956e-10	3.19963e-11	0.000117669
1827	3.16483e-09	6.88458e-10	5.73715e-11	0.000210988
1828	2.91297e-09	6.33672e-10	5.2806e-11	0.000194198
1829	3.24238e-09	7.0533e-10	5.87775e-11	0.000216159
1830	2.61014e-09	5.67794e-10	4.73162e-11	0.000174009
1831	5.23584e-09	1.13897e-09	9.49146e-11	0.000349056
1832	3.20008e-09	6.96127e-10	5.80106e-11	0.000213339
1833	1.59861e-09	3.47753e-10	2.89794e-11	0.000106574
1834	8.88366e-10	1.9325e-10	1.61042e-11	5.92244e-05
1835	2.48125e-09	5.39756e-10	4.49797e-11	0.000165416
1836	5.94224e-09	1.29264e-09	1.0772e-10	0.000396149
1837	1.66498e-09	3.6219e-10	3.01825e-11	0.000110999
1838	2.31678e-09	5.0398e-10	4.19983e-11	0.000154452
1839	3.05938e-09	6.6552e-10	5.546e-11	0.000203959
1840	2.2231e-09	4.83601e-10	4.03001e-11	0.000148207
1841	3.28065e-09	7.13654e-10	5.94712e-11	0.00021871
1842	4.52662e-09	9.84696e-10	8.2058e-11	0.000301775
1843	1.28531e-09	2.796e-10	2.33e-11	8.56876e-05
1844	9.0793e-10	1.97506e-10	1.64588e-11	6.05287e-05
1845	2.7976e-09	6.08574e-10	5.07145e-11	0.000186507
1846	4.30906e-09	9.37368e-10	7.8114e-11	0.000287271
1847	3.64052e-09	7.91938e-10	6.59948e-11	0.000242701
1848	1.4968e-09	3.25606e-10	2.71339e-11	9.9787e-05
1849	2.16912e-09	4.71857e-10	3.93214e-11	0.000144608
1850	2.6509e-09	5.76661e-10	4.80551e-11	0.000176727
1851	2.25924e-09	4.91463e-10	4.09552e-11	0.000150616
1852	1.94824e-09	4.23809e-10	3.53174e-11	0.000129883
1853	3.89804e-09	8.47958e-10	7.06632e-11	0.00025987
1854	2.50685e-09	5.45326e-10	4.54438e-11	0.000167123
1855	3.73399e-09	8.1227e-10	6.76892e-11	0.000248933
1856	2.466e-09	5.36438e-10	4.47032e-11	0.0001644
1857	4.26557e-09	9.27908e-10	7.73257e-11	0.000284371
1858	3.01809e-09	6.56539e-10	5.47116e-11	0.000201206
1859	2.18392e-09	4.75077e-10	3.95897e-11	0.000145594
1860	2.52904e-09	5.50152e-10	4.5846e-11	0.000168603
1861	2.08575e-09	4.53722e-10	3.78102e-11	0.00013905
1862	3.58107e-09	7.79005e-10	6.49171e-11	0.000238738
1863	2.73609e-09	5.95194e-10	4.95995e-11	0.000182406
1864	5.15496e-09	1.12138e-09	9.34484e-11	0.000343664
1865	8.13176e-09	1.76894e-09	1.47411e-10	0.000542117
1866	3.25998e-09	7.09157e-10	5.90964e-11	0.000217332
1867	1.90205e-09	4.13761e-10	3.44801e-11	0.000126803
1868	6.11092e-09	1.32933e-09	1.10778e-10	0.000407395
1869	2.68703e-09	5.8452e-10	4.871e-11	0.000179135
1870	2.76385e-09	6.01233e-10	5.01027e-11	0.000184257
1871	5.47156e-09	1.19025e-09	9.91876e-11	0.000364771
1872	3.15686e-09	6.86725e-10	5.72271e-11	0.000210457
1873	1.79859e-09	3.91255e-10	3.26045e-11	0.000119906
1874	3.25838e-09	7.08809e-10	5.90674e-11	0.000217225
1875	2.22712e-09	4.84474e-10	4.03729e-11	0.000148475
1876	2.2754e-09	4.94978e-10	4.12481e-11	0.000151693
1877	7.9816e-09	1.73627e-09	1.44689e-10	0.000532107
1878	4.96093e-09	1.07917e-09	8.9931e-11	0.000330729
1879	2.05847e-09	4.47787e-10	3.73156e-11	0.000137231
1880	2.21754e-09	4.82392e-10	4.01993e-11	0.000147836
1881	3.44819e-09	7.501e-10	6.25083e-11	0.00022988
1882	1.7444e-09	3.79466e-10	3.16222e-11	0.000116293
1883	2.98333e-09	6.48976e-10	5.40813e-11	0.000198889
1884	5.59025e-09	1.21607e-09	1.01339e-10	0.000372684
1885	3.38706e-09	7.36801e-10	6.14001e-11	0.000225804
1886	4.76385e-09	1.0363e-09	8.63583e-11	0.00031759
1887	1.77161e-09	3.85385e-10	3.21154e-11	0.000118107
1888	1.80356e-09	3.92336e-10	3.26947e-11	0.000120237
1889	2.56757e-09	5.58535e-10	4.65445e-11	0.000171171
1890	3.36329e-09	7.31631e-10	6.09693e-11	0.00022422
1891	1.82981e-09	3.98047e-10	3.31706e-11	0.000121988
1892	5.66963e-09	1.23334e-09	1.02778e-10	0.000377975
1893	1.32644e-09	2.88547e-10	2.40456e-11	8.84296e-05
1894	1.99114e-09	4.3314e-10	3.6095e-11	0.000132742
1895	1.39819e-09	3.04155e-10	2.53463e-11	9.3213e-05
1896	4.47428e-09	9.73309e-10	8.11091e-11	0.000298285
1897	2.97617e-09	6.47419e-10	5.39516e-11	0.000198411
1898	2.71186e-09	5.89923e-10	4.91603e-11	0.000180791
1899	2.33613e-09	5.08188e-10	4.2349e-11	0.000155742
1900	3.27149e-09	7.11662e-10	5.93052e-11	0.0002181
1901	6.13563e-09	1.33471e-09	1.11226e-10	0.000409042
1902	2.24139e-09	4.87579e-10	4.06316e-11	0.000149426
1903	4.04795e-09	8.80568e-10	7.33807e-11	0.000269863
1904	4.25272e-09	9.25112e-10	7.70927e-11	0.000283515
1905	2.91975e-09	6.35146e-10	5.29289e-11	0.00019465
1906	2.7676e-09	6.02047e-10	5.01706e-11	0.000184507
1907	1.99614e-09	4.34228e-10	3.61857e-11	0.000133076
1908	4.85842e-09	1.05687e-09	8.80727e-11	0.000323894
1909	7.11599e-09	1.54797e-09	1.28998e-10	0.000474399
1910	2.34124e-09	5.09299e-10	4.24416e-11	0.000156082
1911	4.20165e-09	9.14003e-10	7.61669e-11	0.00028011
1912	3.02413e-09	6.57852e-10	5.4821e-11	0.000201609
1913	2.01683e-09	4.3873e-10	3.65609e-11	0.000134456
1914	3.59459e-09	7.81946e-10	6.51622e-11	0.000239639
1915	2.48297e-09	5.40131e-10	4.50109e-11	0.000165531
1916	3.76641e-09	8.19323e-10	6.82769e-11	0.000251094
1917	2.52927e-09	5.50203e-10	4.58503e-11	0.000168618
1918	5.7002e-09	1.23999e-09	1.03332e-10	0.000380013
1919	2.07395e-09	4.51154e-10	3.75962e-11	0.000138263
1920	2.79689e-09	6.08419e-10	5.07016e-11	0.000186459
1921	1.42446e-09	3.09869e-10	2.58224e-11	9.49641e-05
1922	1.26431e-09	2.75031e-10	2.29193e-11	8.42875e-05
1923	5.51571e-09	1.19986e-09	9.9988e-11	0.000367714
1924	4.67884e-09	1.01781e-09	8.48172e-11	0.000311922
1925	3.35455e-09	7.29729e-10	6.08107e-11	0.000223637
1926	2.97345e-09	6.46827e-10	5.39023e-11	0.00019823
1927	2.32572e-09	5.05923e-10	4.21602e-11	0.000155048
1928	2.72794e-09	5.9342e-10	4.94517e-11	0.000181863
1929	2.98005e-09	6.48262e-10	5.40219e-11	0.00019867
1930	3.1256e-09	6.79925e-10	5.66605e-11	0.000208373
1931	3.94838e-09	8.58907e-10	7.15756e-11	0.000263225
1932	2.41891e-09	5.26196e-10	4.38497e-11	0.000161261
1933	2.49145e-09	5.41975e-10	4.51646e-11	0.000166097
1934	3.99167e-09	8.68324e-10	7.23604e-11	0.000266111
1935	5.97658e-09	1.30011e-09	1.08343e-10	0.000398439
1936	2.02581e-09	4.40683e-10	3.67236e-11	0.000135054
1937	2.05137e-09	4.46244e-10	3.7187e-11	0.000136758
1938	2.21769e-09	4.82423e-10	4.02019e-11	0.000147846
1939	3.14317e-09	6.83747e-10	5.69789e-11	0.000209545
1940	1.17424e-09	2.55438e-10	2.12865e-11	7.82828e-05
1941	2.37951e-09	5.17626e-10	4.31355e-11	0.000158634
1942	3.95711e-09	8.60808e-10	7.1734e-11	0.000263808
1943	2.08543e-09	4.53652e-10	3.78043e-11	0.000139028
1944	3.49983e-09	7.61333e-10	6.34444e-11	0.000233322
1945	4.09984e-09	8.91856e-10	7.43214e-11	0.000273323
1946	5.68213e-09	1.23606e-09	1.03005e-10	0.000378809
1947	2.97347e-09	6.46832e-10	5.39027e-11	0.000198232
1948	2.30555e-09	5.01537e-10	4.17947e-11	0.000153704
1949	2.22804e-09	4.84674e-10	4.03895e-11	0.000148536
1950	3.86275e-09	8.4028e-10	7.00233e-11	0.000257516
1951	2.96882e-09	6.45819e-10	5.38183e-11	0.000197921
1952	1.91783e-09	4.17194e-10	3.47662e-11	0.000127855
1953	1.9889e-09	4.32653e-10	3.60544e-11	0.000132593
1954	2.86212e-09	6.22609e-10	5.18841e-11	0.000190808
1955	5.074e-09	1.10377e-09	9.19807e-11	0.000338267
1956	6.29621e-09	1.36964e-09	1.14137e-10	0.000419747
1957	2.16933e-09	4.71903e-10	3.93253e-11	0.000144622
1958	4.0581e-09	8.82775e-10	7.35646e-11	0.00027054
1959	3.02586e-09	6.58228e-10	5.48523e-11	0.000201724
1960	4.26851e-09	9.28547e-10	7.73789e-11	0.000284567
1961	1.52694e-09	3.32161e-10	2.76801e-11	0.000101796
1962	2.66829e-09	5.80445e-10	4.83704e-11	0.000177886
1963	3.36513e-09	7.32032e-10	6.10026e-11	0.000224342
1964	1.46415e-09	3.18503e-10	2.65419e-11	9.76101e-05
1965	4.38482e-09	9.53848e-10	7.94874e-11	0.000292321
1966	1.55499e-09	3.38264e-10	2.81886e-11	0.000103666
1967	1.54583e-09	3.36271e-10	2.80226e-11	0.000103055
1968	1.68506e-09	3.66559e-10	3.05465e-11	0.000112337
1969	6.84051e-09	1.48804e-09	1.24004e-10	0.000456034
1970	6.09092e-09	1.32498e-09	1.10415e-10	0.000406061
1971	2.63691e-09	5.73619e-10	4.78016e-11	0.000175794
1972	6.0388e-09	1.31365e-09	1.09471e-10	0.000402587
1973	6.19229e-09	1.34704e-09	1.12253e-10	0.000412819
1974	2.81587e-09	6.12548e-10	5.10457e-11	0.000187725
1975	4.97342e-09	1.08189e-09	9.01574e-11	0.000331561
1976	2.3329e-09	5.07485e-10	4.22904e-11	0.000155527
1977	5.26061e-09	1.14436e-09	9.53635e-11	0.000350707
1978	6.64587e-09	1.4457e-09	1.20475e-10	0.000443058
1979	1.78364e-09	3.88003e-10	3.23336e-11	0.000118909
1980	2.64865e-09	5.76173e-10	4.80144e-11	0.000176577
1981	3.84878e-09	8.37241e-10	6.97701e-11	0.000256585
1982	3.48983e-09	7.59158e-10	6.32632e-11	0.000232656
1983	3.68832e-09	8.02337e-10	6.68614e-11	0.000245888
1984	3.01843e-09	6.56612e-10	5.47177e-11	0.000201229
1985	4.40275e-09	9.57748e-10	7.98123e-11	0.000293516
1986	2.96411e-09	6.44795e-10	5.37329e-11	0.000197607
1987	3.73523e-09	8.1254e-10	6.77117e-11	0.000249015
1988	2.66604e-09	5.79955e-10	4.83295e-11	0.000177736
1989	2.09851e-09	4.56499e-10	3.80415e-11	0.000139901
1990	2.64033e-09	5.74361e-10	4.78634e-11	0.000176022
1991	1.69665e-09	3.69079e-10	3.07566e-11	0.00011311
1992	2.02803e-09	4.41166e-10	3.67638e-11	0.000135202
1993	3.65297e-09	7.94647e-10	6.62206e-11	0.000243532
1994	4.19569e-09	9.12707e-10	7.60589e-11	0.000279713
1995	2.17055e-09	4.7217e-10	3.93475e-11	0.000144704
1996	2.58411e-09	5.62134e-10	4.68445e-11	0.000172274
1997	3.98447e-09	8.66759e-10	7.22299e-11	0.000265631
1998	1.3842e-09	3.01112e-10	2.50926e-11	9.22802e-05
1999	3.57599e-09	7.779e-10	6.4825e-11	0.000238399
[truncated: 8,001 more rows]
