# Supplementary material for: Health risk assessment from habitants of Araró, Michoacán, México, exposed to arsenic by dust, using Monte Carlo probabilistic method
Source: PeerJ. 2025 Jun 10;13:e18805. doi: 10.7717/peerj.18805 (PMC12164815; doi:10.7717/peerj.18805)
Supplement: Supplemental Information 6 [file peerj-13-18805-s006.xlsx]

## Sheet: Risk Premises
Study Title:	Dermico premisas simulación.					Last simulation run:
Study File:	Dermico premisas simulación.xlsx					2022-11-04 21:38:18
	Output Cells	Histogram settings				Multi-cell output range names
Description for Reports	Range Names	Min value	Max value	Step size		title row or column (optional)
	ADD	Auto	Auto	Auto
	ADDc	Auto	Auto	Auto
	CR	Auto	Auto	Auto
	HQ	Auto	Auto	Auto
		Study	Min				Max
	Input Cells	File	Allowed		Expected		Allowed
Description for Reports	Range Names	Values	Values	10/90	Values	90/10	Values	Distributions	Parameters and chart settings
	BW	72.67	18.5	45.1879	73.0913	100.903	194.2	Normal	Mean	72.67	std dev	21.9625	X Axis Min	auto	X Axis Max	auto
	Conc	15.6	5.94	10.1171	15.7996	21.5085	42.53	Normal	Mean	15.6	std dev	4.57375	X Axis Min	auto	X Axis Max	auto
	ED	42.94	20	29.5123	43.5472	57.6608	111	Normal	Mean	42.94	std dev	11.375	X Axis Min	auto	X Axis Max	auto

## Sheet: Simulation Summary
	10000	Simulations run
					Change in expected values as simulations increase									Change in standard deviation as simulations increase
	Minimum result	Maximum result	Expected value	Std deviation	125	250	500	1000	2000	4000	8000	10000		125	250	500	1000	2000	4000	8000	10000
ADD	5.34936e-06	0.000299775	3.64013e-05	2.0171e-05	-	0.0308679	0.0477767	0.000131861	0.0104294	0.0192346	-0.00207078	0.000315881		-	0.169788	0.203332	-0.0332824	0.066158	0.00357563	0.0204252	-0.00782325
ADDc	4.0802e-06	0.000228652	2.77649e-05	1.53854e-05	-	0.0308679	0.0477767	0.000131861	0.0104294	0.0192346	-0.00207078	0.000315881		-	0.169788	0.203332	-0.0332824	0.066158	0.00357563	0.0204252	-0.00782325
CR	2.72013e-06	0.000152434	1.85099e-05	1.02569e-05	-	0.0308679	0.0477767	0.000131861	0.0104294	0.0192346	-0.00207078	0.000315881		-	0.169788	0.203332	-0.0332824	0.066158	0.00357563	0.0204252	-0.00782325
HQ	0.0178312	0.999249	0.121338	0.0672368	-	0.0308679	0.0477767	0.000131861	0.0104294	0.0192346	-0.00207078	0.000315881		-	0.169788	0.203332	-0.0332824	0.066158	0.00357563	0.0204252	-0.00782325

## Sheet: Simulation variance
This worksheet shows the convergence of the output variables as a function of the number of simulations
You should run enough simulations until the % change is very small, typically < 1.0%
ADD
	# of Sims	125	250	500	1000	2000	4000	8000	10000
	Avg Value	3.27771e-05	3.37889e-05	3.54032e-05	3.54079e-05	3.57772e-05	3.64653e-05	3.63898e-05	3.64013e-05
	% Chg		0.0308679	0.0477767	0.000131861	0.0104294	0.0192346	-0.00207078	0.000315881
	Std Dev.	1.36834e-05	1.60067e-05	1.92613e-05	1.86203e-05	1.98522e-05	1.99231e-05	2.03301e-05	2.0171e-05
	% Chg		0.169788	0.203332	-0.0332824	0.066158	0.00357563	0.0204252	-0.00782325
ADDc
	# of Sims	125	250	500	1000	2000	4000	8000	10000
	Avg Value	2.50006e-05	2.57723e-05	2.70036e-05	2.70072e-05	2.72889e-05	2.78137e-05	2.77561e-05	2.77649e-05
	% Chg		0.0308679	0.0477767	0.000131861	0.0104294	0.0192346	-0.00207078	0.000315881
	Std Dev.	1.04369e-05	1.2209e-05	1.46915e-05	1.42025e-05	1.51421e-05	1.51963e-05	1.55067e-05	1.53854e-05
	% Chg		0.169788	0.203332	-0.0332824	0.066158	0.00357563	0.0204252	-0.00782325
CR
	# of Sims	125	250	500	1000	2000	4000	8000	10000
	Avg Value	1.66671e-05	1.71815e-05	1.80024e-05	1.80048e-05	1.81926e-05	1.85425e-05	1.85041e-05	1.85099e-05
	% Chg		0.0308679	0.0477767	0.000131861	0.0104294	0.0192346	-0.00207078	0.000315881
	Std Dev.	6.95796e-06	8.13934e-06	9.79433e-06	9.46835e-06	1.00948e-05	1.01309e-05	1.03378e-05	1.02569e-05
	% Chg		0.169788	0.203332	-0.0332824	0.066158	0.00357563	0.0204252	-0.00782325
HQ
	# of Sims	125	250	500	1000	2000	4000	8000	10000
	Avg Value	0.109257	0.11263	0.118011	0.118026	0.119257	0.121551	0.121299	0.121338
	% Chg		0.0308679	0.0477767	0.000131861	0.0104294	0.0192346	-0.00207078	0.000315881
	Std Dev.	0.0456113	0.0533556	0.0642045	0.0620676	0.0661739	0.0664105	0.0677669	0.0672368
	% Chg		0.169788	0.203332	-0.0332824	0.066158	0.00357563	0.0204252	-0.00782325

## Sheet: ADD Results
ADD Results
Minimum result	5.34936e-06				3.20052e-05	Study value
Maximum result	0.000299775				0.497	of results are equal or lower
Expected value	3.64013e-05				0.503	of results are equal or greater
Std Deviation	2.0171e-05
Out of 10000 simulations		Of those with numeric values:
10000 had numeric values.			5% <=	1.39994e-05
0 had error values.			10% <=	1.67528e-05
			15% <=	1.88726e-05
			20% <=	2.09915e-05
			25% <=	2.2876e-05
			30% <=	2.4819e-05
			35% <=	2.66491e-05
			40% <=	2.83931e-05
			45% <=	3.01703e-05
			50% <=	3.21391e-05
			55% <=	3.4167e-05
			60% <=	3.63631e-05
			65% <=	3.87976e-05
			70% <=	4.16379e-05
			75% <=	4.48266e-05
			80% <=	4.84919e-05
			85% <=	5.29043e-05
			90% <=	6.02136e-05
			95% <=	7.30276e-05
			100% <=	0.000299775
If ADD is:				3.20052e-05	0.497	of results are equal or lower
(Chg to do what ifs)					0.503	of results are greater
					Cumulative				Cumulative
ADD	frequency:				frequency:				frequency:
<=5.34936E-06	1	0.0001		<=5.34936E-06	1	0.0001		=>5.34936E-06	10000	1
5.34936E-06 to 2.08454E-05	1955	0.1955		<=2.08454E-05	1956	0.1956		=>2.08454E-05	8044	0.8044
2.08454E-05 to 3.63415E-05	4038	0.4038		<=3.63415E-05	5994	0.5994		=>3.63415E-05	4006	0.4006
3.63415E-05 to 5.18376E-05	2390	0.239		<=5.18376E-05	8384	0.8384		=>5.18376E-05	1616	0.1616
5.18376E-05 to 6.73336E-05	958	0.0958		<=6.73336E-05	9342	0.9342		=>6.73336E-05	658	0.0658
6.73336E-05 to 8.28297E-05	365	0.0365		<=8.28297E-05	9707	0.9707		=>8.28297E-05	293	0.0293
8.28297E-05 to 9.83258E-05	138	0.0138		<=9.83258E-05	9845	0.9845		=>9.83258E-05	155	0.0155
9.83258E-05 to 0.000113822	61	0.0061		<=0.000113822	9906	0.9906		=>0.000113822	94	0.0094
0.000113822 to 0.000129318	41	0.0041		<=0.000129318	9947	0.9947		=>0.000129318	53	0.0053
0.000129318 to 0.000144814	25	0.0025		<=0.000144814	9972	0.9972		=>0.000144814	28	0.0028
0.000144814 to 0.00016031	16	0.0016		<=0.00016031	9988	0.9988		=>0.00016031	12	0.0012
0.00016031 to 0.000175806	7	0.0007		<=0.000175806	9995	0.9995		=>0.000175806	5	0.0005
0.000175806 to 0.000191302	1	0.0001		<=0.000191302	9996	0.9996		=>0.000191302	4	0.0004
0.000191302 to 0.000206798	1	0.0001		<=0.000206798	9997	0.9997		=>0.000206798	3	0.0003
0.000206798 to 0.000222294	1	0.0001		<=0.000222294	9998	0.9998		=>0.000222294	2	0.0002
0.000222294 to 0.00023779	1	0.0001		<=0.00023779	9999	0.9999		=>0.00023779	1	0.0001
0.00023779 to 0.000253286	0	0		<=0.000253286	9999	0.9999		=>0.000253286	1	0.0001
0.000253286 to 0.000268783	0	0		<=0.000268783	9999	0.9999		=>0.000268783	1	0.0001
0.000268783 to 0.000284279	0	0		<=0.000284279	9999	0.9999		=>0.000284279	1	0.0001
0.000284279 to 0.000299775	1	0.0001		<=0.000299775	10000	1		=>0.000299775	1	0.0001
>0.000299775	0	0
Bin Size	1.54961e-05
Number of bins	21
# of Sims	Avg Value	% Chg		Std Dev.	% Chg
125	3.27771e-05			1.36834e-05
250	3.37889e-05	0.0308679		1.60067e-05	0.169788
500	3.54032e-05	0.0477767		1.92613e-05	0.203332
1000	3.54079e-05	0.000131861		1.86203e-05	-0.0332824
2000	3.57772e-05	0.0104294		1.98522e-05	0.066158
4000	3.64653e-05	0.0192346		1.99231e-05	0.00357563
8000	3.63898e-05	-0.00207078		2.03301e-05	0.0204252
10000	3.64013e-05	0.000315881		2.0171e-05	-0.00782325

## Sheet: ADDc Results
ADDc Results
Minimum result	4.0802e-06				2.44118e-05	Study value
Maximum result	0.000228652				0.497	of results are equal or lower
Expected value	2.77649e-05				0.503	of results are equal or greater
Std Deviation	1.53854e-05
Out of 10000 simulations		Of those with numeric values:
10000 had numeric values.			5% <=	1.0678e-05
0 had error values.			10% <=	1.27781e-05
			15% <=	1.4395e-05
			20% <=	1.60112e-05
			25% <=	1.74486e-05
			30% <=	1.89306e-05
			35% <=	2.03264e-05
			40% <=	2.16567e-05
			45% <=	2.30122e-05
			50% <=	2.45139e-05
			55% <=	2.60607e-05
			60% <=	2.77358e-05
			65% <=	2.95927e-05
			70% <=	3.17591e-05
			75% <=	3.41912e-05
			80% <=	3.6987e-05
			85% <=	4.03525e-05
			90% <=	4.59276e-05
			95% <=	5.57015e-05
			100% <=	0.000228652
If ADDc is:				2.44118e-05	0.497	of results are equal or lower
(Chg to do what ifs)					0.503	of results are greater
					Cumulative				Cumulative
ADDc	frequency:				frequency:				frequency:
<=4.0802E-06	1	0.0001		<=4.0802E-06	1	0.0001		=>4.0802E-06	10000	1
4.0802E-06 to 1.58997E-05	1955	0.1955		<=1.58997E-05	1956	0.1956		=>1.58997E-05	8044	0.8044
1.58997E-05 to 2.77193E-05	4038	0.4038		<=2.77193E-05	5994	0.5994		=>2.77193E-05	4006	0.4006
2.77193E-05 to 3.95388E-05	2390	0.239		<=3.95388E-05	8384	0.8384		=>3.95388E-05	1616	0.1616
3.95388E-05 to 5.13584E-05	958	0.0958		<=5.13584E-05	9342	0.9342		=>5.13584E-05	658	0.0658
5.13584E-05 to 6.3178E-05	365	0.0365		<=6.3178E-05	9707	0.9707		=>6.3178E-05	293	0.0293
6.3178E-05 to 7.49975E-05	138	0.0138		<=7.49975E-05	9845	0.9845		=>7.49975E-05	155	0.0155
7.49975E-05 to 8.68171E-05	61	0.0061		<=8.68171E-05	9906	0.9906		=>8.68171E-05	94	0.0094
8.68171E-05 to 9.86366E-05	41	0.0041		<=9.86366E-05	9947	0.9947		=>9.86366E-05	53	0.0053
9.86366E-05 to 0.000110456	25	0.0025		<=0.000110456	9972	0.9972		=>0.000110456	28	0.0028
0.000110456 to 0.000122276	16	0.0016		<=0.000122276	9988	0.9988		=>0.000122276	12	0.0012
0.000122276 to 0.000134095	7	0.0007		<=0.000134095	9995	0.9995		=>0.000134095	5	0.0005
0.000134095 to 0.000145915	1	0.0001		<=0.000145915	9996	0.9996		=>0.000145915	4	0.0004
0.000145915 to 0.000157734	1	0.0001		<=0.000157734	9997	0.9997		=>0.000157734	3	0.0003
0.000157734 to 0.000169554	1	0.0001		<=0.000169554	9998	0.9998		=>0.000169554	2	0.0002
0.000169554 to 0.000181373	1	0.0001		<=0.000181373	9999	0.9999		=>0.000181373	1	0.0001
0.000181373 to 0.000193193	0	0		<=0.000193193	9999	0.9999		=>0.000193193	1	0.0001
0.000193193 to 0.000205013	0	0		<=0.000205013	9999	0.9999		=>0.000205013	1	0.0001
0.000205013 to 0.000216832	0	0		<=0.000216832	9999	0.9999		=>0.000216832	1	0.0001
0.000216832 to 0.000228652	1	0.0001		<=0.000228652	10000	1		=>0.000228652	1	0.0001
>0.000228652	0	0
Bin Size	1.18196e-05
Number of bins	21
# of Sims	Avg Value	% Chg		Std Dev.	% Chg
125	2.50006e-05			1.04369e-05
250	2.57723e-05	0.0308679		1.2209e-05	0.169788
500	2.70036e-05	0.0477767		1.46915e-05	0.203332
1000	2.70072e-05	0.000131861		1.42025e-05	-0.0332824
2000	2.72889e-05	0.0104294		1.51421e-05	0.066158
4000	2.78137e-05	0.0192346		1.51963e-05	0.00357563
8000	2.77561e-05	-0.00207078		1.55067e-05	0.0204252
10000	2.77649e-05	0.000315881		1.53854e-05	-0.00782325

## Sheet: CR Results
CR Results
Minimum result	2.72013e-06				1.62745e-05	Study value
Maximum result	0.000152434				0.497	of results are equal or lower
Expected value	1.85099e-05				0.503	of results are equal or greater
Std Deviation	1.02569e-05
Out of 10000 simulations		Of those with numeric values:
10000 had numeric values.			5% <=	7.11864e-06
0 had error values.			10% <=	8.51876e-06
			15% <=	9.59667e-06
			20% <=	1.06741e-05
			25% <=	1.16324e-05
			30% <=	1.26204e-05
			35% <=	1.3551e-05
			40% <=	1.44378e-05
			45% <=	1.53415e-05
			50% <=	1.63426e-05
			55% <=	1.73738e-05
			60% <=	1.84905e-05
			65% <=	1.97284e-05
			70% <=	2.11727e-05
			75% <=	2.27942e-05
			80% <=	2.4658e-05
			85% <=	2.69017e-05
			90% <=	3.06184e-05
			95% <=	3.71343e-05
			100% <=	0.000152434
If CR is:				1.62745e-05	0.497	of results are equal or lower
(Chg to do what ifs)					0.503	of results are greater
					Cumulative				Cumulative
CR	frequency:				frequency:				frequency:
<=2.72013E-06	1	0.0001		<=2.72013E-06	1	0.0001		=>2.72013E-06	10000	1
2.72013E-06 to 1.05998E-05	1955	0.1955		<=1.05998E-05	1956	0.1956		=>1.05998E-05	8044	0.8044
1.05998E-05 to 1.84795E-05	4038	0.4038		<=1.84795E-05	5994	0.5994		=>1.84795E-05	4006	0.4006
1.84795E-05 to 2.63592E-05	2390	0.239		<=2.63592E-05	8384	0.8384		=>2.63592E-05	1616	0.1616
2.63592E-05 to 3.42389E-05	958	0.0958		<=3.42389E-05	9342	0.9342		=>3.42389E-05	658	0.0658
3.42389E-05 to 4.21186E-05	365	0.0365		<=4.21186E-05	9707	0.9707		=>4.21186E-05	293	0.0293
4.21186E-05 to 4.99983E-05	138	0.0138		<=4.99983E-05	9845	0.9845		=>4.99983E-05	155	0.0155
4.99983E-05 to 5.7878E-05	61	0.0061		<=5.7878E-05	9906	0.9906		=>5.7878E-05	94	0.0094
5.7878E-05 to 6.57577E-05	41	0.0041		<=6.57577E-05	9947	0.9947		=>6.57577E-05	53	0.0053
6.57577E-05 to 7.36374E-05	25	0.0025		<=7.36374E-05	9972	0.9972		=>7.36374E-05	28	0.0028
7.36374E-05 to 8.15171E-05	16	0.0016		<=8.15171E-05	9988	0.9988		=>8.15171E-05	12	0.0012
8.15171E-05 to 8.93968E-05	7	0.0007		<=8.93968E-05	9995	0.9995		=>8.93968E-05	5	0.0005
8.93968E-05 to 9.72765E-05	1	0.0001		<=9.72765E-05	9996	0.9996		=>9.72765E-05	4	0.0004
9.72765E-05 to 0.000105156	1	0.0001		<=0.000105156	9997	0.9997		=>0.000105156	3	0.0003
0.000105156 to 0.000113036	1	0.0001		<=0.000113036	9998	0.9998		=>0.000113036	2	0.0002
0.000113036 to 0.000120916	1	0.0001		<=0.000120916	9999	0.9999		=>0.000120916	1	0.0001
0.000120916 to 0.000128795	0	0		<=0.000128795	9999	0.9999		=>0.000128795	1	0.0001
0.000128795 to 0.000136675	0	0		<=0.000136675	9999	0.9999		=>0.000136675	1	0.0001
0.000136675 to 0.000144555	0	0		<=0.000144555	9999	0.9999		=>0.000144555	1	0.0001
0.000144555 to 0.000152434	1	0.0001		<=0.000152434	10000	1		=>0.000152434	1	0.0001
>0.000152434	0	0
Bin Size	7.8797e-06
Number of bins	21
# of Sims	Avg Value	% Chg		Std Dev.	% Chg
125	1.66671e-05			6.95796e-06
250	1.71815e-05	0.0308679		8.13934e-06	0.169788
500	1.80024e-05	0.0477767		9.79433e-06	0.203332
1000	1.80048e-05	0.000131861		9.46835e-06	-0.0332824
2000	1.81926e-05	0.0104294		1.00948e-05	0.066158
4000	1.85425e-05	0.0192346		1.01309e-05	0.00357563
8000	1.85041e-05	-0.00207078		1.03378e-05	0.0204252
10000	1.85099e-05	0.000315881		1.02569e-05	-0.00782325

## Sheet: HQ Results
HQ Results
Minimum result	0.0178312				0.106684	Study value
Maximum result	0.999249				0.497	of results are equal or lower
Expected value	0.121338				0.503	of results are equal or greater
Std Deviation	0.0672368
Out of 10000 simulations		Of those with numeric values:
10000 had numeric values.			5% <=	0.0466646
0 had error values.			10% <=	0.0558428
			15% <=	0.0629088
			20% <=	0.0699718
			25% <=	0.0762534
			30% <=	0.08273
			35% <=	0.0888302
			40% <=	0.0946436
			45% <=	0.100568
			50% <=	0.10713
			55% <=	0.11389
			60% <=	0.12121
			65% <=	0.129325
			70% <=	0.138793
			75% <=	0.149422
			80% <=	0.16164
			85% <=	0.176348
			90% <=	0.200712
			95% <=	0.243425
			100% <=	0.999249
If HQ is:				0.106684	0.497	of results are equal or lower
(Chg to do what ifs)					0.503	of results are greater
					Cumulative				Cumulative
HQ	frequency:				frequency:				frequency:
<=0.017831199	1	0.0001		<=0.017831199	1	0.0001		=>0.017831199	10000	1
0.017831199 to 0.069484762	1955	0.1955		<=0.069484762	1956	0.1956		=>0.069484762	8044	0.8044
0.069484762 to 0.121138325	4038	0.4038		<=0.121138325	5994	0.5994		=>0.121138325	4006	0.4006
0.121138325 to 0.172791888	2390	0.239		<=0.172791888	8384	0.8384		=>0.172791888	1616	0.1616
0.172791888 to 0.224445451	958	0.0958		<=0.224445451	9342	0.9342		=>0.224445451	658	0.0658
0.224445451 to 0.276099014	365	0.0365		<=0.276099014	9707	0.9707		=>0.276099014	293	0.0293
0.276099014 to 0.327752577	138	0.0138		<=0.327752577	9845	0.9845		=>0.327752577	155	0.0155
0.327752577 to 0.37940614	61	0.0061		<=0.37940614	9906	0.9906		=>0.37940614	94	0.0094
0.37940614 to 0.431059703	41	0.0041		<=0.431059703	9947	0.9947		=>0.431059703	53	0.0053
0.431059703 to 0.482713266	25	0.0025		<=0.482713266	9972	0.9972		=>0.482713266	28	0.0028
0.482713266 to 0.534366829	16	0.0016		<=0.534366829	9988	0.9988		=>0.534366829	12	0.0012
0.534366829 to 0.586020392	7	0.0007		<=0.586020392	9995	0.9995		=>0.586020392	5	0.0005
0.586020392 to 0.637673955	1	0.0001		<=0.637673955	9996	0.9996		=>0.637673955	4	0.0004
0.637673955 to 0.689327518	1	0.0001		<=0.689327518	9997	0.9997		=>0.689327518	3	0.0003
0.689327518 to 0.740981081	1	0.0001		<=0.740981081	9998	0.9998		=>0.740981081	2	0.0002
0.740981081 to 0.792634644	1	0.0001		<=0.792634644	9999	0.9999		=>0.792634644	1	0.0001
0.792634644 to 0.844288207	0	0		<=0.844288207	9999	0.9999		=>0.844288207	1	0.0001
0.844288207 to 0.89594177	0	0		<=0.89594177	9999	0.9999		=>0.89594177	1	0.0001
0.89594177 to 0.947595333	0	0		<=0.947595333	9999	0.9999		=>0.947595333	1	0.0001
0.947595333 to 0.999248896	1	0.0001		<=0.999248896	10000	1		=>0.999248896	1	0.0001
>0.999248896	0	0
Bin Size	0.0516536
Number of bins	21
# of Sims	Avg Value	% Chg		Std Dev.	% Chg
125	0.109257			0.0456113
250	0.11263	0.0308679		0.0533556	0.169788
500	0.118011	0.0477767		0.0642045	0.203332
1000	0.118026	0.000131861		0.0620676	-0.0332824
2000	0.119257	0.0104294		0.0661739	0.066158
4000	0.121551	0.0192346		0.0664105	0.00357563
8000	0.121299	-0.00207078		0.0677669	0.0204252
10000	0.121338	0.000315881		0.0672368	-0.00782325

## Sheet: Simulation Input Values 1
Sim #	BW	Conc	ED
1	74.5428	13.9682	31.6463
2	64.7649	17.4217	21.3259
3	62.0663	17.6301	47.166
4	74.3445	17.2861	40.968
5	65.5946	16.4048	28.2293
6	78.3009	15.7867	41.0561
7	98.2665	14.3336	46.8464
8	73.4551	6.44783	50.2752
9	90.7877	11.6484	50.5054
10	74.2539	19.4003	38.2291
11	45.5391	13.2069	31.8533
12	69.1955	15.15	44.5354
13	84.8579	10.1061	50.0364
14	40.1867	14.7038	42.082
15	69.739	20.2251	45.998
16	81	24.7406	37.3683
17	59.555	17.6072	26.4021
18	90.4217	19.3263	43.2507
19	79.418	11.4633	50.9426
20	68.7539	17.4844	59.9715
21	50.5539	16.0896	47.293
22	56.2423	18.5129	47.5546
23	118.415	15.0158	47.7894
24	64.0264	18.6878	56.3751
25	67.2977	12.9171	51.1454
26	81.6338	20.5437	52.2522
27	92.3851	24.3054	51.5557
28	86.3201	11.5823	43.5106
29	65.0162	15.8012	41.183
30	55.3646	11.7947	42.2401
31	66.5519	10.5348	39.3334
32	68.2325	14.647	49.5939
33	96.4929	15.3445	61.916
34	57.2479	11.2996	31.9598
35	58.0187	15.4405	35.4383
36	85.8944	14.6255	49.6725
37	79.0077	17.8867	47.2274
38	100.898	18.2207	49.7091
39	89.0996	9.77177	46.7048
40	83.5882	12.4308	58.0021
41	122.775	24.1768	22.8428
42	86.4037	10.3954	61.1147
43	53.1527	13.4012	44.4857
44	67.3924	20.1166	43.4317
45	86.2506	18.9997	36.6592
46	88.028	15.2482	40.9665
47	107.601	10.8099	42.8785
48	72.9905	20.9666	36.9609
49	95.721	14.9167	55.8298
50	53.0524	20.5295	48.1201
51	81.3744	17.061	40.9071
52	75.5871	15.7581	53.4298
53	88.3749	7.16789	56.436
54	75.0261	14.0903	30.9789
55	116.651	11.703	54.1795
56	84.2164	17.916	31.797
57	94.7259	12.1904	50.3702
58	65.3194	14.6206	33.0903
59	35.628	10.1219	41.8506
60	69.5913	14.0855	31.6301
61	74.0359	21.9006	34.3226
62	34.5723	19.448	45.321
63	130.631	17.4717	40.1176
64	81.942	13.751	28.3618
65	98.5291	8.92238	54.0314
66	85.4214	25.5118	29.714
67	94.8467	15.2052	48.2796
68	71.6148	17.7636	41.8252
69	67.927	14.073	73.5456
70	93.4688	17.1236	40.2768
71	88.8412	16.0032	39.2002
72	67.0702	21.2908	29.1904
73	32.9016	15.1584	52.3084
74	66.7699	15.441	42.3347
75	98.71	23.9313	43.5524
76	65.5004	15.0776	50.3256
77	111.824	26.0835	21.7898
78	116.539	16.8648	35.0841
79	105.114	15.9696	41.2226
80	73.3694	9.57405	39.7678
81	40.1694	12.7164	32.0718
82	68.3303	15.0002	62.9044
83	94.2618	14.4498	53.165
84	53.5615	14.2788	35.9767
85	101.664	8.87905	44.236
86	81.5899	14.4498	55.702
87	75.9411	17.2493	46.6357
88	102.255	15.8011	51.0883
89	73.6898	18.1767	59.9749
90	61.1247	19.6452	39.3423
91	76.4716	19.0122	43.0404
92	55.8423	15.8022	49.4252
93	75.5458	17.8501	43.7805
94	83.7589	19.979	42.0515
95	77.6301	16.3093	37.975
96	100.876	18.6268	68.4579
97	79.1575	16.848	32.9331
98	55.1702	15.8612	39.7879
99	77.1041	8.84524	29.3355
100	65.305	17.0604	35.1892
101	99.7035	14.0489	58.1261
102	91.769	12.1737	44.6988
103	113.768	23.0551	27.7019
104	65.1107	17.072	20.0361
105	121.479	16.4416	44.6618
106	91.1188	11.1681	50.5729
107	48.9563	25.7327	26.4859
108	97.2731	15.6194	69.0346
109	37.5943	11.9083	56.0324
110	104.856	13.2954	42.7112
111	51.15	21.6828	27.213
112	59.0812	18.9967	43.7428
113	49.5092	16.3419	48.2942
114	81.2016	15.237	51.4126
115	89.9105	14.659	32.9554
116	90.0605	15.0836	43.3753
117	92.6033	14.4101	39.5896
118	83.3207	17.7463	60.0577
119	81.2523	15.6117	46.7358
120	49.8216	8.45702	39.1836
121	139.023	14.0158	49.0396
122	92.1178	19.3803	55.2037
123	92.0496	23.8625	31.93
124	73.331	19.5994	38.7131
125	43.6099	17.8584	47.5812
126	102.645	13.7952	39.7163
127	68.8111	12.3697	48.6623
128	79.7919	10.5405	29.4223
129	63.7334	9.29881	52.381
130	59.8556	17.4333	69.4046
131	90.2584	14.7597	28.1527
132	59.0523	14.4776	42.6703
133	69.0266	22.1169	48.436
134	49.7507	11.6738	48.4327
135	73.1959	16.6584	39.1651
136	100.686	21.6285	44.0631
137	64.957	17.5145	47.0799
138	72.9477	11.6894	34.1353
139	35.85	13.3513	63.5065
140	78.2874	9.52548	55.0588
141	74.6809	15.758	49.5366
142	47.8666	15.6873	42.4397
143	68.0524	15.3124	40.1985
144	57.1196	8.08932	29.0288
145	48.7876	14.0323	60.5124
146	99.7992	18.077	32.6198
147	52.873	13.5395	30.8912
148	99.426	12.4668	54.3275
149	86.4898	23.382	51.6442
150	61.141	15.0806	51.1741
151	83.8284	18.8726	48.2342
152	72.7618	15.6838	43.1862
153	48.6864	13.0733	57.6055
154	60.9301	10.085	45.5413
155	76.0849	21.039	57.6533
156	94.0378	12.5591	51.9845
157	73.0543	13.4614	30.9987
158	61.5085	16.7456	38.504
159	67.1251	19.1466	49.4415
160	79.191	25.3946	29.2024
161	85.3771	20.5181	50.9617
162	74.3042	15.4866	50.0806
163	91.9119	16.7132	57.0415
164	114.798	15.4445	63.9931
165	87.9781	20.8895	42.8265
166	66.6804	14.1197	46.0756
167	91.7933	11.4021	27.9605
168	70.0305	15.7033	46.757
169	62.5827	12.6482	54.9432
170	75.1455	25.4309	37.6499
171	89.9305	17.5149	31.7456
172	69.5995	17.846	39.3303
173	128.905	12.9599	40.7353
174	82.8802	19.617	58.081
175	76.8828	14.117	43.53
176	81.1306	25.144	43.3977
177	58.6973	11.0821	42.5646
178	47.8603	13.0029	50.8184
179	113.194	10.8306	27.9569
180	117.738	16.6761	46.6458
181	94.4398	14.9716	38.3238
182	53.563	23.4845	57.8337
183	88.9004	18.565	25.4889
184	77.1427	6.29214	40.1546
185	42.4649	18.5902	28.1381
186	86.4715	17.517	44.0581
187	65.4182	11.3936	51.8636
188	39.9975	13.8912	51.0885
189	82.617	18.1822	49.3131
190	37.8679	22.7951	49.513
191	74.2239	14.0936	63.2661
192	24.0202	19.787	33.9424
193	74.0718	13.1627	37.1748
194	128.732	18.2566	38.9277
195	68.2746	24.3092	26.7207
196	82.5916	16.5148	41.8237
197	112.078	11.7517	48.7268
198	60.3393	12.0412	42.5186
199	107.158	15.4509	23.5398
200	119.078	19.0526	35.6795
201	49.8192	17.1273	33.0034
202	52.6354	10.5944	48.2998
203	57.7214	17.1843	31.0137
204	89.4414	19.9249	44.109
205	87.2438	12.9684	47.4371
206	60.5212	8.80389	55.0953
207	75.7274	23.426	33.5872
208	60.4492	25.465	50.5206
209	95.1957	16.3868	51.744
210	84.646	11.3146	34.1035
211	53.08	17.6137	72.9842
212	97.7833	10.0671	41.901
213	49.1442	9.87209	47.5625
214	64.8797	9.84595	43.004
215	97.0333	19.2357	59.3407
216	136.086	18.7027	35.7997
217	63.6635	15.0128	44.5451
218	79.8447	11.2223	41.8571
219	59.3286	15.206	61.9332
220	71.23	14.4614	53.7952
221	95.1492	9.10652	65.7842
222	53.2463	18.8868	45.9085
223	93.2381	17.064	50.9651
224	107.106	9.18644	36.9264
225	82.7954	17.0896	61.9868
226	48.7567	7.42787	31.8601
227	87.1057	19.4962	32.3028
228	78.5283	10.0568	56.4141
229	80.3201	14.1508	45.4586
230	64.1017	19.694	38.8076
231	63.4067	12.6812	54.3948
232	55.4575	11.4231	49.6448
233	86.406	24.5744	55.1942
234	40.7224	18.9983	54.5591
235	75.2781	13.8754	31.0891
236	61.7782	16.9846	55.371
237	69.3341	17.5463	52.9096
238	95.6088	15.3977	50.8496
239	47.3285	14.2936	48.4518
240	111.983	13.2189	49.4046
241	65.8186	10.144	40.3055
242	107.543	13.0843	53.6176
243	52.4244	11.5532	30.9729
244	87.204	11.9412	62.5718
245	71.3627	9.45498	40.971
246	91.0626	18.07	39.926
247	89.8642	11.481	42.3174
248	75.0586	11.6117	47.4194
249	56.9271	6.09086	51.0268
250	54.5464	8.04604	40.9336
251	56.5322	22.5296	48.5204
252	59.3795	17.6945	59.7803
253	110.556	22.9273	41.877
254	67.5035	12.8381	41.4749
255	44.6075	15.4527	50.2063
256	69.3234	21.7077	64.3743
257	92.271	21.1915	51.7874
258	106.252	14.5749	54.981
259	96.3889	6.60274	40.9537
260	54.1558	20.7217	29.6788
261	27.1165	7.80686	50.8281
262	69.702	13.6646	42.1457
263	77.3656	20.8089	44.9441
264	71.6708	17.6377	43.2572
265	54.3826	11.5813	66.5594
266	74.6214	15.8918	36.4376
267	88.2438	12.6674	40.2181
268	85.8671	14.8778	42.1409
269	61.16	18.0822	50.7373
270	73.9633	20.2448	31.6629
271	75.9777	18.8545	47.215
272	70.4051	19.5837	54.176
273	54.3162	17.8311	48.6462
274	86.1821	10.6959	35.7768
275	26.1586	20.055	54.3097
276	65.9768	12.8967	42.4134
277	97.4661	17.1825	50.0158
278	84.269	17.996	59.8974
279	86.7849	12.3827	47.3711
280	79.0944	13.5322	53.7231
281	45.024	20.589	48.5497
282	107.634	13.5272	59.7274
283	61.8183	12.8145	26.3416
284	70.4256	13.8238	41.9547
285	108.201	14.9701	52.8976
286	41.741	14.0694	46.9591
287	45.2599	19.6786	44.1835
288	56.6409	12.0183	23.899
289	66.9059	12.7267	45.7347
290	85.8573	10.8845	56.1243
291	66.1229	18.7509	31.502
292	93.8465	20.2231	46.8979
293	113.393	12.9895	27.4892
294	64.9521	17.6059	51.9827
295	21	16.2491	41.7264
296	76.2368	15.6035	55.2325
297	70.8373	6.73597	57.2868
298	76.955	20.3089	43.826
299	83.1404	16.3342	28.255
300	67.3027	15.0138	39.0824
301	80.2732	11.7474	27.5187
302	79.3059	17.1089	34.2835
303	57.9695	17.6468	26.8647
304	60.5177	8.31882	42.8861
305	48.9488	18.6018	21.4414
306	92.6501	18.0573	49.7078
307	62.4257	15.6364	34.4192
308	82.7874	10.8194	33.6645
309	91.4611	10.3923	43.0934
310	58.7648	15.6188	48.508
311	46.1617	19.7933	60.0935
312	62.9309	17.0532	34.7614
313	43.4512	21.2757	26.4551
314	85.2435	14.6556	55.2123
315	77.2757	11.8649	30.6585
316	64.9774	13.4007	43.882
317	94.8953	15.0849	48.1328
318	90.3866	13.2757	46.4998
319	88.6775	25.548	44.8385
320	75.6058	9.45348	59.4763
321	58.7153	10.8408	42.8666
322	65.1793	11.8155	52.304
323	67.1192	14.2967	33.401
324	97.6022	12.0091	24.0739
325	49.2011	15.8789	26.6048
326	59.2613	13.5375	48.0883
327	89.1407	25.1018	22.0372
328	60.455	24.4259	42.9976
329	64.755	21.2995	47.6204
330	53.5436	13.0929	38.2328
331	94.6761	13.6637	22.6809
332	92.6557	15.6731	36.5432
333	78.2887	10.4329	53.3781
334	95.9357	16.9131	33.0415
335	77.4168	23.1354	40.3021
336	92.3718	22.6833	42.0963
337	64.4402	18.1306	37.2924
338	69.5844	14.7609	50.8633
339	79.2792	14.6797	23.5333
340	73.8338	18.434	28.9182
341	48.615	5.97603	32.024
342	59.3212	15.3991	49.8294
343	35.8506	20.6005	36.3565
344	96.7391	13.0953	40.633
345	119.959	21.0819	27.5461
346	84.3632	14.1003	35.7435
347	77.14	16.6096	56.3136
348	72.6966	19.9788	33.4997
349	52.812	14.3243	37.8119
350	25.61	16.0197	56.9548
351	26.2295	12.6184	29.515
352	71.3546	15.7739	35.4079
353	101.772	6.63662	39.3324
354	67.1902	15.927	34.1808
355	96.6125	24.2835	66.4842
356	79.9412	16.6098	32.8887
357	67.1354	14.5103	40.1391
358	76.0354	9.09172	35.0048
359	74.867	15.1003	49.5659
360	76.944	22.4098	64.534
361	34.7844	11.7232	52.9118
362	52.108	11.2465	54.6214
363	19.813	14.3132	38.4708
364	45.2925	10.1693	47.499
365	23.6596	23.8367	34.5265
366	73.314	10.1565	56.6105
367	25.2428	18.7942	53.4016
368	84.054	8.18275	42.1379
369	70.0066	18.4728	40.1796
370	59.699	18.0438	34.3583
371	69.7585	20.4644	27.8395
372	105.645	23.1329	49.4281
373	81.625	8.10987	40.0899
374	54.5192	22.0149	38.1319
375	77.4304	19.0755	26.5478
376	73.0429	14.6333	43.1879
377	70.2472	20.9235	55.5274
378	56.6425	12.5726	49.4112
379	65.0395	8.85416	32.6175
380	77.8904	19.4925	51.7712
381	55.629	12.114	61.3276
382	72.8698	20.0583	36.1014
383	63.9347	21.6033	27.638
384	66.1813	17.3444	38.4574
385	111.774	14.6955	53.0426
386	59.2995	11.5353	44.4622
387	95.0683	13.5164	35.4976
388	35.8869	20.3872	27.8889
389	94.4034	21.1172	53.6305
390	108.09	11.7632	36.3431
391	69.8948	21.5375	28.5336
392	73.3872	11.5904	46.4369
393	65.9615	17.2183	33.07
394	86.0551	23.5615	41.2288
395	68.1814	14.4874	29.7328
396	80.1348	7.5427	33.2989
397	29.9495	13.3926	26.2792
398	46.7371	15.1509	47.9453
399	59.4902	23.3209	55.954
400	104.136	13.0014	54.9235
401	79.9078	16.1137	31.4144
402	74.1323	17.9522	36.132
403	70.6413	16.3545	60.9265
404	83.8311	24.6574	63.0467
405	54.2542	20.0427	25.8285
406	67.7377	22.7817	45.5641
407	45.2975	16.8605	47.2216
408	94.0851	16.1556	43.1734
409	61.2034	12.5367	54.7897
410	66.1929	18.3646	25.2886
411	67.6882	12.5057	46.8028
412	74.0945	14.4839	22.7729
413	73.7053	13.9802	47.8224
414	53.4909	15.4551	40.7015
415	94.2217	20.8363	28.7303
416	92.5993	10.768	49.2033
417	76.3918	19.1678	41.6688
418	68.1546	18.9658	41.1044
419	113.247	18.1762	47.0404
420	91.3616	11.279	41.0606
421	85.6076	9.0306	24.5953
422	107.378	26.5083	30.227
423	74.9129	18.8554	60.9959
424	61.1249	11.9687	41.9348
425	103.341	14.1071	35.4165
426	92.685	17.7237	55.9878
427	81.1305	11.3042	34.8131
428	77.0136	17.3301	28.5355
429	106.34	12.7831	41.6467
430	60.7195	19.1055	50.9437
431	53.8215	17.8379	72.571
432	50.4575	10.0107	55.9795
433	99.3018	14.1524	49.7983
434	100.129	21.7491	70.2499
435	60.911	22.2328	54.3868
436	64.7573	23.1578	60.768
437	45.9234	20.5788	51.2225
438	89.1252	6.86097	30.0496
439	51.6205	11.9021	23.1299
440	65.7093	19.8123	37.6316
441	87.6269	13.9513	51.2835
442	33.3052	11.4638	45.1984
443	93.1239	24.7148	36.61
444	86.102	11.9819	43.7076
445	85.8631	14.5239	41.989
446	51.4469	20.6595	25.1054
447	75.4648	8.08193	25.361
448	53.1628	12.7845	53.818
449	51.051	19.5366	57.4196
450	86.8968	12.9691	30.4783
451	41.7364	22.1276	53.0357
452	76.5561	23.4882	48.5059
453	96.7132	16.4555	58.6383
454	101.134	16.6873	43.1152
455	134.423	12.8929	55.5071
456	88.0097	13.1527	42.1338
457	58.3936	21.4551	31.6723
458	58.1326	7.15259	41.858
459	39.5747	16.5684	45.022
460	83.5435	15.8933	30.8526
461	95.2928	12.4157	64.6807
462	86.4338	16.024	23.9217
463	54.3033	14.0892	57.8827
464	64.8957	12.483	43.3177
465	98.8124	15.1701	28.0181
466	89.1309	23.1244	64.4729
467	83.7045	20.6181	36.2897
468	68.8093	12.0922	52.6592
469	47.624	10.5659	46.1412
470	65.4074	15.2854	33.7883
471	61.2184	19.5134	58.1743
472	106.159	12.6794	50.9207
473	90.176	13.5799	35.4668
474	73.0622	16.7516	64.2493
475	64.5608	14.3667	46.6062
476	41.5449	18.1406	43.9903
477	93.2271	20.2773	44.6179
478	89.8026	24.2568	42.7978
479	101.72	7.85453	48.7618
480	121.693	8.8957	56.2841
481	70.4702	10.6636	43.5864
482	35.3179	17.4752	49.3169
483	75.3395	26.2505	39.5016
484	82.8847	14.8756	39.9375
485	58.43	10.6921	47.5074
486	76.114	11.1412	45.2472
487	44.767	22.0247	35.4538
488	40.1157	16.8255	50.5773
489	135.002	14.4699	32.2383
490	77.8265	9.01593	45.6656
491	76.7892	18.0845	22.1762
492	39.8641	13.9116	40.8312
493	56.3185	9.98122	36.7336
494	54.1705	13.1643	67.9985
495	81.9212	13.6816	39.6567
496	70.5664	12.6014	50.5989
497	93.4435	13.8811	32.6485
498	67.8939	18.7031	27.3054
499	86.5153	18.9186	58.3472
500	54.2385	20.1688	38.2468
501	88.9346	10.55	51.0361
502	81.6946	19.7553	34.2874
503	36.6823	14.1759	31.5151
504	114.667	18.7451	47.9073
505	62.9811	16.4151	55.4728
506	97.1676	14.3402	47.618
507	29.334	13.9733	35.1087
508	63.8866	15.3379	49.8466
509	55.4745	15.179	36.0919
510	48.0451	21.0023	28.3789
511	85.6281	23.3903	30.8472
512	64.3626	9.59118	48.9747
513	76.3795	13.7878	45.1084
514	47.4265	23.0567	42.9344
515	71.0063	17.0623	31.1152
516	35.0063	17.3923	56.8516
517	51.903	19.1374	36.0772
518	89.6537	15.4817	28.7699
519	84.7755	15.3604	46.4775
520	59.4041	18.9589	55.993
521	112.672	21.5513	30.8057
522	54.4673	20.7729	50.9447
523	45.8574	22.841	64.413
524	87.8235	15.5014	61.6534
525	87.9846	12.1306	54.5291
526	95.5063	14.5899	41.0735
527	105.505	17.7867	56.5803
528	64.5335	14.5478	52.0627
529	55.4464	17.6154	51.9302
530	108.398	10.3009	23.6139
531	79.7976	19.0881	53.4372
532	80.6229	14.0191	28.8719
533	99.1163	12.0337	31.824
534	83.2293	15.3872	49.0473
535	48.2919	18.5422	48.1366
536	60.4234	10.3652	51.5629
537	89.4016	16.8938	43.8545
538	83.2795	21.9134	54.1639
539	51.4943	9.23873	25.9245
540	78.9003	14.6341	56.1209
541	61.7683	12.5952	46.432
542	45.2776	13.7806	34.4314
543	85.5084	12.7067	53.3874
544	49.5399	14.0325	44.567
545	46.9337	23.446	24.5616
546	66.3741	11.818	34.6448
547	100.211	9.75662	45.678
548	85.183	18.4109	71.4197
549	112.945	17.9702	50.3633
550	62.9433	9.59217	31.8664
551	33.8541	16.7543	25.2536
552	53.0563	15.3085	23.8599
553	84.395	16.2	50.1654
554	68.4455	13.5428	47.9526
555	82.3579	17.3199	48.9502
556	95.6941	21.1746	77.767
557	109.271	14.7551	41.1481
558	90.3835	15.7785	32.3668
559	46.8142	11.7657	31.6781
560	95.9341	15.4425	30.655
561	71.3315	18.9065	41.3767
562	69.7246	12.5785	45.3385
563	89.3812	13.7589	30.6957
564	69.4654	21.4018	30.6971
565	73.6558	12.5796	56.2687
566	53.2545	17.3411	36.8192
567	84.916	9.14414	25.7409
568	30.339	19.7575	28.5159
569	55.2062	11.3947	53.5523
570	108.201	13.6937	26.581
571	76.5771	17.4198	46.6928
572	55.1597	14.1815	53.4328
573	78.6539	9.44342	44.841
574	37.4822	18.9475	36.3659
575	55.4585	17.6177	42.0914
576	89.2144	11.5663	47.3921
577	41.6362	16.0228	39.6771
578	95.5126	13.8793	38.6202
579	59.5198	14.8913	27.6825
580	100.163	17.242	46.1643
581	22.454	8.45198	46.2119
582	75.1221	21.6516	44.0064
583	105.002	16.6621	20.8325
584	80.9999	14.9923	50.3382
585	85.1123	14.5894	58.3154
586	62.4802	13.3141	56.6687
587	114.759	22.8902	36.1152
588	86.377	14.9885	49.5883
589	78.1092	8.4214	54.1451
590	84.4659	14.7556	42.3644
591	44.2315	16.7645	62.9106
592	70.6336	17.3042	49.4268
593	77.693	21.3459	46.7286
594	51.0816	13.0891	58.5932
595	69.9238	13.3717	35.6887
596	124.615	15.7649	42.9347
597	92.2933	12.4639	35.6536
598	114.444	15.7816	23.3086
599	68.3379	9.58938	45.2298
600	91.2971	16.0441	52.7823
601	72.9493	9.48446	49.8508
602	62.4043	24.046	60.9672
603	84.0687	9.00955	62.93
604	69.5402	22.753	32.752
605	75.3706	16.8407	48.0431
606	83.6483	11.2929	44.5339
607	78.9264	18.9534	43.2592
608	42.6514	17.2295	27.3173
609	79.2913	20.2117	39.4247
610	41.8895	12.3545	40.3178
611	81.1999	16.831	56.4923
612	39.0964	11.3551	53.09
613	50.5195	19.4981	43.7346
614	61.0712	13.6776	46.0083
615	63.1825	15.4665	33.5275
616	108.456	18.3861	36.4533
617	46.3487	16.3721	25.6747
618	109.247	13.6725	42.324
619	95.8194	12.6916	46.3801
620	57.3446	24.951	56.3823
621	29.9899	15.3643	30.8738
622	22.4122	17.1625	45.1338
623	59.904	18.81	69.8793
624	118.302	21.1164	50.0185
625	107.524	18.6055	66.8341
626	74.7108	15.668	39.6511
627	62.5005	24.4739	26.9232
628	58.7612	10.798	39.4438
629	71.0085	15.856	37.9338
630	54.1482	10.8791	37.0842
631	88.4274	19.7711	51.7908
632	53.5984	17.23	64.511
633	104.398	10.8358	40.2283
634	60.7507	13.7249	52.0171
635	75.753	16.5473	41.45
636	54.5195	13.3423	44.4196
637	42.5208	21.5884	46.5512
638	79.0681	10.5319	36.8155
639	43.4142	16.177	44.9051
640	73.5938	9.72856	50.8394
641	73.117	12.8601	38.464
642	84.312	20.4974	58.5514
643	78.6043	17.1261	33.3628
644	87.788	18.571	43.3233
645	105.704	17.4453	65.0063
646	57.9883	17.5717	55.3323
647	66.7761	10.4818	54.9882
648	39.3311	18.4483	43.6465
649	83.8368	18.5502	39.2964
650	94.8688	12.6522	49.8028
651	79.3663	18.6084	57.2987
652	36.2535	11.8542	45.2012
653	96.6147	28.5819	26.262
654	44.2226	11.9926	41.8161
655	65.2284	14.4999	62.3991
656	72.4926	18.3883	31.6423
657	68.2429	11.172	52.0126
658	31.9699	21.8439	46.0948
659	106.268	14.4414	46.1079
660	65.4823	13.8368	37.2931
661	83.2071	25.6501	35.005
662	82.6147	18.1322	52.4152
663	66.6076	18.3928	36.8269
664	35.0978	21.3763	50.0057
665	115.993	11.4277	33.406
666	103.785	13.8796	41.9138
667	64.3554	18.1776	42.6299
668	89.1828	15.8494	31.5862
669	74.9939	17.936	51.2279
670	80.9318	17.4981	54.4863
671	36.4133	20.42	29.7929
672	69.9365	15.5965	61.9381
673	86.122	11.3714	59.9691
674	38.4678	14.8977	33.7188
675	79.0301	22.8031	35.7245
676	76.6091	12.8534	64.3307
677	67.4405	18.1952	39.3368
678	62.2551	17.4249	38.2671
679	79.8631	14.6689	42.3334
680	87.7794	17.622	46.6969
681	92.4811	15.6454	39.5509
682	96.3574	12.8868	59.0735
683	120.107	18.5039	54.4874
684	96.625	15.3282	45.0604
685	81.1108	18.7467	30.2702
686	96.1997	13.0413	46.3533
687	70.2418	14.3838	40.2112
688	62.998	14.1925	48.8773
689	73.9238	10.6288	49.532
690	80.095	10.1333	40.9443
691	98.3449	13.1536	60.8728
692	87.1339	19.4918	32.2078
693	79.4013	7.63203	32.3998
694	73.4083	15.0942	33.8057
695	99.0715	25.1491	43.5781
696	95.3343	18.1305	44.1447
697	121.801	12.7109	36.5112
698	78.3726	17.8884	50.4735
699	61.4138	14.4729	65.5639
700	42.3249	23.8272	47.5334
701	88.4141	13.5429	48.162
702	69.525	20.9604	52.6562
703	27.3015	13.7692	46.9665
704	66.3819	22.5675	54.2339
705	82.1386	11.636	60.938
706	119.357	14.7844	26.9916
707	44.1069	13.5335	35.012
708	65.1613	13.3189	49.9158
709	50.446	15.5876	44.2796
710	64.7096	15.538	25.3377
711	65.723	16.486	64.9935
712	71.0916	20.3552	36.4212
713	84.8849	22.6971	47.5115
714	71.9313	15.5189	47.8866
715	72.5112	10.5286	36.6756
716	61.512	18.5428	32.8907
717	30.1227	17.3674	37.0682
718	110.92	16.5999	45.9088
719	90.8454	17.7029	27.6983
720	65.365	21.8177	37.7656
721	67.2744	21.9008	26.2178
722	85.0066	21.5539	47.8933
723	61.1955	19.6234	42.8983
724	70.987	14.3094	37.665
725	99.4702	19.1214	35.8716
726	73.3887	9.31393	30.1026
727	81.328	13.1273	32.157
728	93.2875	22.7837	44.201
729	62.7587	21.5254	38.3991
730	83.4902	9.18541	37.7084
731	60.0185	15.9576	54.2475
732	69.0814	6.45134	37.8619
733	80.9543	17.6659	45.0647
734	46.555	11.7096	43.3722
735	93.1185	13.1893	28.7581
736	82.6895	22.3848	41.8249
737	68.3819	16.4161	63.4433
738	70.307	14.3955	52.3113
739	86.5784	15.5113	32.1269
740	56.9252	22.0741	47.5634
741	88.4936	14.8632	46.8494
742	94.211	15.886	43.3117
743	76.9613	18.4786	57.2125
744	70.0338	20.5354	54.2093
745	119.215	12.4123	45.1144
746	82.7244	18.8908	35.9664
747	80.1744	13.6632	43.9607
748	109.72	20.0199	34.5843
749	79.3531	17.282	33.0887
750	46.5187	13.3918	50.7141
751	74.4001	13.8822	28.4115
752	50.4102	13.0788	40.7735
753	43.4326	19.8377	46.3709
754	84.1949	18.5074	49.4472
755	83.8275	15.0778	51.691
756	104.541	13.3042	30.1644
757	69.9208	8.67908	48.502
758	96.0099	22.3713	57.8031
759	77.0122	11.8847	24.214
760	59.1155	16.4056	34.5732
761	57.1459	11.316	48.092
762	84.1297	18.5166	34.2222
763	50.4869	17.1737	23.1877
764	56.7037	16.8431	26.3429
765	78.6551	10.8148	36.213
766	41.0765	19.6144	31.4629
767	81.22	10.6681	28.2228
768	59.7895	17.5075	28.0941
769	95.3662	20.5086	49.2639
770	69.9943	15.8638	55.5334
771	95.6968	19.1763	43.1596
772	56.1139	9.25964	40.533
773	99.2857	15.5805	36.3181
774	30.1407	17.9912	39.5588
775	102.267	15.9165	35.7798
776	86.2695	25.1521	33.9141
777	88.3889	19.7221	34.9462
778	49.8517	8.62366	54.3104
779	80.2599	19.619	52.5993
780	85.0077	24.4561	49.1932
781	37.1189	8.47871	55.1922
782	53.1166	15.1869	44.1121
783	73.7783	10.6574	23.8683
784	85.1318	15.3996	24.4255
785	51.1856	8.28681	46.9317
786	61.9478	15.1027	33.3833
787	65.9402	19.4238	28.9951
788	50.6853	17.9756	39.1315
789	87.9951	13.5686	45.6178
790	61.3359	13.8383	46.2959
791	89.884	19.8371	51.2298
792	83.2481	20.7045	61.2191
793	73.717	13.393	44.9642
794	61.8658	12.5314	56.4904
795	92.808	22.9528	41.3686
796	58.3879	9.1091	36.3163
797	65.531	22.5407	58.4958
798	67.8411	13.1833	41.0465
799	94.4236	17.0961	60.1135
800	105.401	14.1835	31.6184
801	49.0139	11.0525	40.1539
802	54.7688	20.9882	44.1161
803	84.6567	11.7926	40.7311
804	77.1728	20.0652	37.7237
805	90.8074	15.7118	31.6993
806	58.5792	15.4601	32.1117
807	55.4453	12.2774	40.1861
808	51.0413	12.7511	35.4862
809	39.9231	12.2108	30.7611
810	81.1606	8.94181	57.6377
811	62.0504	19.6965	51.9985
812	66.3607	12.1374	34.8286
813	61.5958	18.1196	55.3149
814	88.5442	17.4776	28.4211
815	77.7201	10.0796	35.4199
816	80.7401	12.2419	46.9817
817	77.6318	10.9923	39.5992
818	64.1337	11.7832	38.3005
819	23.0394	11.2509	55.9008
820	51.5908	12.7121	41.9959
821	41.5802	15.8232	44.5769
822	91.0845	17.9385	26.7998
823	101.25	22.9212	61.9287
824	71.0242	15.45	31.8489
825	80.1968	17.4245	42.742
826	85.0806	15.9851	44.8101
827	53.0878	16.902	31.4408
828	135.54	12.3451	47.5191
829	82.4386	18.7522	37.1776
830	83.4548	10.2063	22.0082
831	96.4429	9.96136	55.1192
832	39.5936	12.7025	47.1405
833	59.3417	9.63972	38.8903
834	85.6764	9.87628	50.2355
835	105.556	18.738	20.6067
836	54.041	10.9628	44.0718
837	75.8083	11.4558	49.2843
838	77.8952	15.3123	41.056
839	53.214	18.2644	48.34
840	61.5208	13.7112	33.9025
841	78.4312	16.619	46.0403
842	62.2244	19.8358	45.4866
843	98.5648	22.1194	65.7044
844	70.4234	15.7841	43.6621
845	100.342	19.0587	45.8393
846	68.4757	26.518	38.9381
847	70.9599	11.3918	57.4634
848	65.7359	15.2374	37.2872
849	65.3339	17.0985	65.1287
850	58.0394	14.5181	31.9531
851	81.5255	16.3127	47.6815
852	44.9191	27.0699	38.9441
853	40.4266	17.8624	23.1149
854	37.511	18.6586	47.2825
855	69.4625	12.7307	29.7829
856	87.5402	17.9885	24.463
857	63.3945	17.2676	48.4574
858	64.6336	20.8302	59.197
859	67.9005	18.1182	41.8527
860	71.4098	7.96072	32.3653
861	54.7986	7.89701	32.083
862	76.5867	26.0037	25.4278
863	61.1299	21.478	27.8261
864	85.6323	17.4229	26.4349
865	45.5114	13.4706	32.0789
866	95.3499	8.82486	53.4544
867	88.1859	7.77496	54.2845
868	83.7997	20.1148	66.5949
869	88.2775	25.0852	26.9301
870	54.0717	15.9949	46.9152
871	69.2456	14.406	39.103
872	44.4196	14.5714	47.209
873	65.1207	10.2335	44.5359
874	94.2644	11.1789	54.4167
875	58.1799	14.2662	54.1792
876	48.1136	18.4164	32.6685
877	24.4661	10.7819	37.4369
878	91.528	13.0109	32.2363
879	110.209	23.4539	54.4256
880	84.4813	27.9221	32.7169
881	65.2578	18.8774	32.4204
882	92.8688	11.1972	42.4433
883	102.275	11.6632	45.0566
884	105.912	19.3463	26.8658
885	76.9336	11.8943	39.206
886	66.9153	18.2708	50.1855
887	50.5224	11.306	34.885
888	98.2838	21.2871	50.3261
889	70.0531	18.5017	26.2954
890	53.4613	14.4632	35.2977
891	83.9207	8.94516	50.3839
892	73.3871	13.164	38.706
893	99.484	13.8694	33.4311
894	79.5091	14.3777	31.7159
895	35.2972	15.9621	45.9255
896	115.7	16.0145	43.3314
897	74.608	19.3765	42.313
898	85.9494	6.75336	32.314
899	30.6737	12.6774	29.7242
900	34.5538	12.0009	45.5009
901	85.2821	19.0672	49.1944
902	59.2183	14.9416	44.1514
903	93.4653	21.5798	53.0272
904	96.9352	19.6754	38.0992
905	78.7629	15.1112	38.2289
906	44.7376	15.9187	36.9057
907	59.8827	10.7153	25.6323
908	111.313	18.3535	50.6005
909	81.5296	11.6339	35.2629
910	88.8551	9.08475	50.3381
911	68.205	8.40287	26.2104
912	69.1183	16.3692	32.6344
913	57.6272	15.6869	52.5853
914	65.7405	12.0606	32.4088
915	59.7575	18.54	77.9343
916	71.4503	18.1282	48.7606
917	80.0157	13.6378	30.3873
918	83.561	9.42018	56.8867
919	105.594	10.8062	40.3829
920	42.9431	9.47382	48.0133
921	44.1861	15.5565	49.3781
922	72.8533	18.5969	39.6734
923	91.2313	12.0088	60.3084
924	39.381	12.5044	48.1418
925	66.6217	14.9614	29.968
926	57.3225	13.7749	56.2697
927	53.1359	12.0582	33.1372
928	57.1158	17.1352	44.7071
929	66.4896	12.3584	30.0857
930	93.3164	16.4181	26.9744
931	65.7303	23.8534	62.7712
932	48.0826	19.999	51.9454
933	107.316	19.0927	36.7697
934	97.4396	11.7813	49.2674
935	78.7845	19.8437	56.9595
936	57.7873	14.7754	37.5638
937	91.3055	16.5154	42.9193
938	51.7567	13.2156	31.8207
939	87.341	17.549	38.438
940	83.7643	14.6492	30.3697
941	87.5623	13.03	41.7889
942	90.2295	18.0273	61.6304
943	52.05	19.2603	43.598
944	59.3826	9.7226	45.2467
945	83.6151	14.2814	31.4006
946	71.009	9.78263	31.908
947	31.6147	15.0334	45.4158
948	83.0471	19.9076	36.4268
949	82.6388	21.5551	61.1998
950	93.0602	16.9377	47.45
951	56.6135	16.743	46.842
952	92.0885	14.0141	46.968
953	70.3384	18.8788	42.7489
954	75.4704	8.96495	28.8544
955	48.42	20.3637	50.5234
956	78.762	13.3238	44.0976
957	60.5211	14.4386	60
958	105.587	16.4162	41.0145
959	70.3749	18.4663	36.4658
960	53.0753	18.8894	39.1871
961	113.106	16.94	36.8545
962	76.2627	12.6673	38.7431
963	70.451	11.1762	40.9144
964	52.4436	12.619	34.5168
965	47.4082	17.8595	32.5762
966	63.5552	14.4769	36.4892
967	64.4104	11.6104	68.429
968	64.585	21.9306	40.6859
969	90.1665	18.5256	48.1054
970	82.9453	17.4996	40.5914
971	119.663	23.7841	41.0455
972	71.7239	21.2297	32.9422
973	50.9943	13.5435	43.712
974	31.1321	17.3408	28.4819
975	87.2826	25.0676	33.7309
976	68.4322	6.17962	48.9127
977	83.4759	13.4737	44.9069
978	77.0531	18.3363	41.2848
979	88.3993	16.4328	35.8474
980	72.9998	18.8057	36.1807
981	63.3446	14.2806	35.5211
982	35.7269	11.1106	36.8787
983	79.91	20.7278	30.0825
984	64.0602	21.0281	30.9405
985	69.3255	12.4278	62.9618
986	96.0902	18.218	40.9857
987	77.7209	17.1865	46.4914
988	56.8914	20.5305	22.239
989	39.122	12.5593	23.2373
990	34.2092	17.247	69.0776
991	82.8921	20.1376	38.7325
992	87.7113	21.696	54.0522
993	76.1244	19.3898	22.968
994	102.54	11.2427	48.9841
995	66.0833	23.2611	28.2097
996	31.0996	13.5355	45.8108
997	115.544	11.7279	47.8639
998	59.5607	9.63893	46.9413
999	53.3036	14.9836	46.5985
1000	51.5537	15.4379	30.594
1001	36.3123	17.3508	23.6949
1002	84.4331	20.8323	55.5103
1003	76.7786	20.0252	45.4426
1004	82.3239	16.4901	53.6021
1005	96.0405	14.1182	32.7376
1006	44.698	25.2594	39.5842
1007	56.5989	24.11	45.9381
1008	44.7003	16.5936	46.981
1009	81.0304	8.23346	49.6962
1010	72.2533	16.023	36.6295
1011	76.0529	16.6937	46.931
1012	27.16	15.9542	41.8029
1013	112.781	15.6482	58.1809
1014	40.3439	10.7229	33.3229
1015	67.0032	10.6171	45.627
1016	48.9894	22.9877	46.4769
1017	77.6461	20.0734	42.7987
1018	22.3195	22.0716	50.8808
1019	52.9759	18.9181	46.4174
1020	84.4249	11.7785	40.0124
1021	104.117	14.8869	37.3503
1022	65.9977	13.096	47.0049
1023	34.023	15.0349	45.0021
1024	77.0169	10.5958	47.7796
1025	81.6647	14.2167	52.0208
1026	90.0875	13.5162	44.2636
1027	38.1592	22.2603	36.7629
1028	84.8373	16.7797	41.2222
1029	76.7786	17.5172	46.1904
1030	37.6855	7.26881	46.1649
1031	30.344	12.8819	34.5432
1032	84.2371	24.8488	42.5144
1033	89.1388	15.5922	42.557
1034	55.4624	14.303	42.2199
1035	64.1237	15.7791	27.4401
1036	95.0096	9.50174	64.9557
1037	101.502	8.52546	48.2083
1038	88.2624	10.7674	51.8272
1039	69.2566	23.421	39.6172
1040	94.2519	11.8141	29.7165
1041	87.2936	14.6636	49.0341
1042	48.5807	14.606	44.1957
1043	54.4225	12.7452	39.8419
1044	87.6657	14.3542	42.9492
1045	74.4085	8.59492	43.8447
1046	47.3516	19.2134	32.2227
1047	94.2393	16.1829	49.9278
1048	102.903	10.3161	39.9101
1049	63.1118	23.604	48.8232
1050	91.5949	23.4336	51.1632
1051	72.236	7.64993	47.0757
1052	89.9059	15.1752	36.9295
1053	78.7385	21.8589	34.4005
1054	90.5206	6.91976	33.5841
1055	108.876	9.14709	22.9226
1056	91.738	15.5464	47.073
1057	20.3959	11.3548	52.704
1058	84.9591	8.20386	43.7518
1059	75.177	13.8541	52.5352
1060	74.8638	29.7053	51.6497
1061	67.5745	13.2379	33.4261
1062	108.016	19.9078	43.7298
1063	63.2873	14.1212	37.5133
1064	131.022	14.0366	34.0804
1065	55.1973	12.712	60.7169
1066	78.7691	22.8148	46.2554
1067	73.8109	12.1273	36.5776
1068	58.7125	19.0629	29.2264
1069	101.315	19.5404	34.308
1070	90.1116	9.26707	59.5981
1071	47.2931	15.9455	51.3928
1072	64.5785	16.9159	71.6526
1073	93.9189	8.37314	28.364
1074	25.8093	16.3911	48.7464
1075	101.296	18.0132	42.2772
1076	63.2699	10.7731	50.5154
1077	59.4153	14.3336	56.8389
1078	30.289	10.9458	54.1106
1079	74.3671	14.5898	37.4522
1080	81.3203	14.9191	55.0548
1081	84.8624	15.97	54.9094
1082	85.3364	9.07803	53.8795
1083	20.3479	13.729	33.0635
1084	89.486	16.065	56.5649
1085	66.8837	21.9622	29.5901
1086	66.9545	13.8499	53.4821
1087	63.9506	10.842	25.4212
1088	34.8337	21.0155	33.6477
1089	48.8762	13.282	54.8152
1090	58.8226	13.4176	65.7648
1091	71.4179	18.238	33.9374
1092	87.9949	24.1591	75.3508
1093	64.5896	17.1895	47.9089
1094	49.2961	14.8623	28.1645
1095	69.201	17.1624	53.8038
1096	76.576	13.1616	41.882
1097	65.2106	10.578	37.6941
1098	71.077	13.7129	42.2407
1099	89.6291	22.0453	51.4896
1100	41.2633	15.8252	37.7784
1101	106.968	17.8046	46.252
1102	74.1491	10.3509	35.3492
1103	29.9835	17.2532	48.0862
1104	97.9671	16.262	27.9995
1105	68.2387	16.4248	58.9377
1106	101.106	16.2841	49.4058
1107	37.4085	8.34028	48.2579
1108	96.0882	14.076	30.5944
1109	78.0216	20.6443	37.7444
1110	77.6282	16.2192	37.4822
1111	57.9458	12.0461	48.3208
1112	48.3313	14.9037	65.33
1113	83.971	15.4131	41.7596
1114	111.681	20.4195	58.1297
1115	86.7518	17.9937	31.3209
1116	85.7763	14.4451	47.1257
1117	90.4384	17.4365	37.8515
1118	108.739	20.5561	49.9273
1119	72.7007	15.4834	37.3325
1120	68.1201	16.4438	29.3972
1121	49.4172	6.31371	48.8827
1122	52.662	20.8452	37.5106
1123	78.9285	13.1406	34.2783
1124	69.6243	23.221	38.5819
1125	41.8995	8.14596	54.4941
1126	89.8181	18.0465	48.1909
1127	86.1491	9.33131	32.1194
1128	67.1513	14.893	45.2029
1129	42.4957	18.3267	43.5259
1130	68.4614	15.8986	49.5762
1131	93.1657	21.1597	35.4686
1132	68.0847	13.5286	55.2175
1133	51.578	14.9539	33.4106
1134	79.1782	27.7883	58.6957
1135	51.0719	20.1175	35.642
1136	77.325	7.08207	55.9962
1137	71.3842	11.9477	44.8417
1138	58.4484	16.8258	34.5662
1139	75.1095	15.3109	50.9088
1140	79.3832	9.34408	64.8051
1141	49.6728	8.20488	34.7052
1142	68.9972	13.1017	36.4913
1143	90.0438	13.0117	42.1027
1144	90.9136	13.9912	42.0868
1145	68.3311	17.7566	50.4885
1146	70.2434	13.2037	52.0116
1147	70.132	15.6767	56.2391
1148	45.6487	16.3465	33.1605
1149	68.6449	19.4576	32.0343
1150	60.3486	11.7266	54.84
1151	51.4659	9.2275	48.823
1152	110.906	13.0042	47.6799
1153	67.4822	18.4899	42.6619
1154	83.3857	17.4502	35.3644
1155	66.3876	21.6236	43.4885
1156	64.7913	12.2963	28.7195
1157	107.44	12.7909	33.7845
1158	62.1765	10.8614	39.5209
1159	104.361	12.7315	36.0198
1160	65.0124	11.6223	26.8448
1161	57.236	15.3303	22.8387
1162	56.803	22.5265	31.3778
1163	115.314	18.9667	44.7238
1164	93.9486	15.6525	49.7151
1165	61.5045	6.85311	57.4986
1166	95.9623	11.9406	47.6024
1167	54.7076	16.5609	38.0249
1168	80.201	15.7947	33.1874
1169	46.4134	17.6597	42.4106
1170	61.3097	7.82655	39.7618
1171	41.2436	16.0352	43.7688
1172	79.0702	16.9768	43.3247
1173	35.858	24.7649	21.7204
1174	28.2465	15.9863	50.0526
1175	64.7958	15.4644	20.3808
1176	94.9091	16.0388	48.1446
1177	74.8986	13.2049	40.1247
1178	80.4927	12.3291	49.0398
1179	110.51	22.1119	52.038
1180	44.1137	21.3106	21.1921
1181	33.0606	13.8631	26.2975
1182	94.8372	22.1184	60.3907
1183	93.0655	13.3863	45.3428
1184	122.146	19.874	28.486
1185	43.7235	9.4018	56.6016
1186	43.5692	20.5072	53.9834
1187	89.2433	13.0185	60.6011
1188	95.7105	11.4084	60.4203
1189	80.286	8.61668	57.7817
1190	108.333	13.2946	33.1482
1191	62.5792	15.6314	41.7108
1192	75.485	9.36067	63.6991
1193	38.0882	6.82015	26.2527
1194	26.7619	10.4383	39.3327
1195	77.4225	8.00339	44.9137
1196	85.4026	19.8109	52.2547
1197	56.1579	13.4466	44.5707
1198	56.4821	12.2773	45.5277
1199	45.8666	18.2086	45.3809
1200	65.1362	16.1249	39.3542
1201	111.395	14.6115	29.5008
1202	87.5	19.6183	33.5389
1203	122.073	17.7074	48.1038
1204	103.442	11.1058	41.2347
1205	88.9971	18.3401	49.2306
1206	50.3023	19.7127	36.4799
1207	54.4359	14.5345	28.6064
1208	73.9674	14.7854	31.372
1209	94.3845	17.2965	38.2392
1210	95.6575	18.1092	39.939
1211	58.1323	20.4364	49.3975
1212	77.3661	13.3728	24.414
1213	57.9613	20.2078	32.6343
1214	88.1396	14.8094	47.1581
1215	96.5754	17.5544	44.9093
1216	78.4542	11.7633	42.6707
1217	92.5401	22.5916	34.0326
1218	81.0033	24.9412	52.4317
1219	94.476	14.5647	24.0286
1220	89.0153	17.1041	31.7254
1221	83.2597	14.8541	31.8451
1222	56.0638	18.4942	53.0319
1223	83.4577	22.6071	77.646
1224	41.3072	26.8132	67.0183
1225	56.7541	15.638	44.7644
1226	113.319	14.8708	48.0663
1227	113.734	12.5095	38.4543
1228	104.839	15.6175	34.0716
1229	40.1319	8.74196	45.9874
1230	93.7896	13.3732	37.8258
1231	44.8207	18.8991	42.8146
1232	42.8244	10.8015	57.6091
1233	73.9405	22.768	20.3667
1234	54.3948	9.06503	31.5926
1235	120.778	18.2628	44.7875
1236	93.4	20.0569	55.2546
1237	62.7759	12.3824	50.5819
1238	101.414	9.30875	44.1781
1239	64.7737	18.9775	47.3022
1240	79.2427	9.18307	21.0104
1241	97.4698	12.1681	48.4362
1242	51.3344	20.1744	40.1546
1243	48.7377	10.0008	38.5891
1244	43.5301	17.5723	67.8811
1245	77.5761	7.57722	28.1201
1246	48.1633	9.59766	60.0805
1247	68.4164	14.1005	63.8509
1248	90.9152	17.3059	43.583
1249	61.8438	17.039	54.2462
1250	51.4464	22.8891	36.0763
1251	72.1633	17.5443	38.5608
1252	78.8157	8.77119	40.6278
1253	98.3445	21.3215	54.9089
1254	66.8159	11.7947	40.7034
1255	28.9363	20.9647	40.5133
1256	114.234	15.6339	31.8611
1257	99.438	15.6106	40.6049
1258	77.931	12.2425	43.35
1259	28.9257	16.8944	60.6451
1260	64.8566	19.6933	42.7496
1261	89.3471	17.4619	50.9287
1262	67.4028	8.38318	38.3122
1263	108.897	19.2263	67.4203
1264	55.1141	12.5005	40.5033
1265	89.1126	8.78018	35.8114
1266	96.7123	11.535	52.575
1267	66.3816	19.1317	54.2148
1268	99.2993	12.56	25.5053
1269	78.2785	6.53561	53.8146
1270	79.4337	13.2685	20.3065
1271	87.081	14.3565	48.9229
1272	109.553	20.426	46.1295
1273	81.3465	15.9116	27.3059
1274	62.1005	16.7834	50.3804
1275	72.6912	10.3137	35.5591
1276	89.5012	17.1966	35.0567
1277	76.0826	10.3332	26.6282
1278	86.7975	21.0456	67.3816
1279	59.6784	7.96193	42.2693
1280	101.634	17.4029	50.2724
1281	52.8202	17.7456	57.4853
1282	75.2039	14.25	42.2426
1283	76.6127	16.8783	33.5071
1284	56.5185	21.8017	63.1638
1285	61.002	22.4775	43.9944
1286	98.5209	13.5586	50.2655
1287	82.7649	7.02505	40.5275
1288	45.7562	21.7921	44.0973
1289	72.1431	13.4961	34.0431
1290	36.0592	23.229	34.7623
1291	93.6122	14.454	44.8722
1292	79.1287	12.7502	46.2492
1293	78.5928	18.1608	45.4552
1294	40.2582	12.2953	27.6942
1295	102.415	24.283	31.4258
1296	84.5097	11.5094	23.7533
1297	72.5296	12.2635	33.093
1298	72.6326	23.43	47.2255
1299	93.4229	12.0327	32.8428
1300	35.7592	16.7911	34.1884
1301	69.5148	18.4748	40.6579
1302	65.116	15.2024	44.3361
1303	77.452	13.1794	46.6224
1304	68.9935	8.98239	47.614
1305	62.4117	12.8498	23.3613
1306	74.5995	16.7471	64.4845
1307	78.2937	11.0648	26.0533
1308	88.9444	19.8579	56.0102
1309	30.5592	20.1839	37.6495
1310	96.0266	9.84895	34.7483
1311	101.064	17.4772	37.1951
1312	35.1116	15.3981	31.4166
1313	64.5223	16.0119	38.3046
1314	92.6653	21.2443	45.843
1315	65.8457	12.7695	29.5694
1316	69.1295	16.2906	58.1052
1317	99.298	13.3919	46.7539
1318	93.0326	16.7651	25.5242
1319	102.172	20.3727	35.4962
1320	59.7548	10.9116	31.0162
1321	134.054	21.0365	28.8118
1322	56.4769	11.0174	40.6191
1323	83.6441	10.7993	47.3594
1324	70.6229	12.4005	48.8724
1325	80.0737	20.5327	36.4653
1326	47.2461	23.2336	39.0513
1327	78.8416	20.4911	55.4272
1328	74.955	16.839	44.4848
1329	113.984	21.1195	53.8997
1330	64.0431	14.7985	34.7107
1331	95.2228	14.0655	40.451
1332	66.792	13.1019	43.2903
1333	91.0808	7.45892	33.8912
1334	69.9459	10.5055	54.2837
1335	80.6535	21.4633	53.6866
1336	98.0658	14.7252	30.4709
1337	79.296	12.553	36.88
1338	88.258	12.7223	34.0626
1339	85.1939	15.6276	34.7713
1340	106.863	16.1622	35.2406
1341	73.0459	20.2594	59.8165
1342	37.8047	15.323	40.6528
1343	92.0547	19.3187	45.1498
1344	71.4703	17.9007	34.6617
1345	57.6473	18.4747	39.1994
1346	44.4183	11.6652	43.1161
1347	70.719	20.326	28.5513
1348	75.7875	12.3673	72.6313
1349	72.5896	10.1561	44.839
1350	57.2958	13.6082	31.1626
1351	46.7615	20.881	52.6414
1352	96.976	20.0015	40.2943
1353	69.5332	15.4375	45.8538
1354	70.6583	14.8998	35.6542
1355	56.9451	22.0956	33.9104
1356	86.4996	17.5971	37.2881
1357	58.051	12.7108	39.9649
1358	69.2061	11.4898	51.5291
1359	53.8532	13.1178	28.7383
1360	90.3018	8.77844	32.7145
1361	51.0675	17.771	41.4002
1362	47.202	14.1536	33.5319
1363	80.9682	15.2823	49.6071
1364	57.162	16.4618	53.9565
1365	70.2346	19.9641	48.0177
1366	53.2645	17.9741	41.0052
1367	47.6063	13.0545	35.4257
1368	69.3876	13.48	36.9134
1369	84.0473	23.0233	44.0449
1370	83.0012	17.9457	51.0823
1371	102.603	13.7726	45.5181
1372	82.7514	17.2003	21.5043
1373	55.7418	24.7443	40.2915
1374	108.777	11.9788	30.5723
1375	83.1525	12.9793	34.0291
1376	101.428	13.3753	55.0616
1377	64.6309	10.8913	53.2767
1378	95.9958	8.77573	30.896
1379	85.0074	19.4376	46.0021
1380	82.6241	22.6589	59.3102
1381	40.2876	18.9619	47.7781
1382	44.1676	14.1676	70.8362
1383	55.4421	6.25081	29.6931
1384	70.6387	22.6988	48.8569
1385	90.7056	16.4983	41.5763
1386	94.5681	16.5014	54.5165
1387	34.4482	10.8449	48.2244
1388	85.0468	11.3569	51.4616
1389	111.854	17.3027	36.3561
1390	21.8936	20.2994	41.4841
1391	86.9298	12.6824	41.3553
1392	96.0525	11.3638	34.6701
1393	108.033	13.8329	61.977
1394	66.5959	12.7987	34.8993
1395	108.287	17.5013	61.3567
1396	130.308	16.3834	39.6465
1397	58.8123	19.805	43.6827
1398	81.2546	15.4095	52.4587
1399	46.0304	13.5778	39.8124
1400	72.9291	23.1988	32.9554
1401	104.228	19.6054	45.1455
1402	108.081	18.6212	41.5768
1403	73.7021	22.9852	34.0776
1404	68.5696	17.678	42.8045
1405	88.8377	14.8245	59.2201
1406	53.6317	16.7006	41.436
1407	81.2714	22.6856	52.9457
1408	83.4488	15.8183	53.4356
1409	112.383	8.8317	27.9166
1410	53.7966	19.5716	57.8438
1411	87.2274	13.2528	55.2782
1412	90.4978	14.2281	57.5881
1413	50.7866	20.8744	41.2439
1414	34.9226	7.08976	46.3738
1415	66.288	22.5527	40.6219
1416	72.95	19.8951	44.7957
1417	105.22	6.57918	38.7615
1418	110.817	7.6989	25.3546
1419	66.2657	18.0806	44.3703
1420	74.6739	11.9371	49.5929
1421	59.6344	13.1737	38.7094
1422	58.3131	6.2357	35.6489
1423	48.1987	11.3259	51.0302
1424	91.0056	15.4582	41.7624
1425	46.1537	14.2223	25.9277
1426	117.143	6.80012	42.1508
1427	75.504	15.6961	50.3512
1428	81.7965	12.211	69.9268
1429	127.552	8.46492	53.7837
1430	37.4526	15.1468	60.5885
1431	78.0938	19.0675	42.1508
1432	79.7322	17.0245	48.8691
1433	111.415	17.1849	40.5421
1434	44.3511	17.5435	25.9419
1435	87.0551	15.5659	45.2063
1436	57.5412	17.9537	40.9001
1437	81.8899	16.8399	20.6086
1438	70.3038	19.2737	54.446
1439	85.0558	14.8958	61.6119
1440	60.8518	19.6426	23.097
1441	84.6455	16.5741	43.199
1442	72.8925	21.4352	43.2875
1443	70.7952	17.5102	45.5203
1444	53.9536	14.3242	33.4934
1445	59.5319	15.2001	55.5066
1446	53.2959	13.633	42.694
1447	68.7713	19.749	49.9807
1448	83.5486	21.5359	41.286
1449	116.244	20.4294	63.6507
1450	93.8874	13.4087	44.3672
1451	121.599	17.9442	33.2166
1452	87.6046	9.80365	41.1251
1453	111.799	18.5056	44.1503
1454	52.3054	19.6542	34.4075
1455	54.9378	6.18798	77.1358
1456	89.0564	15.6998	44.8156
1457	60.1134	14.4485	40.7169
1458	82.7456	17.2574	43.0121
1459	94.6587	15.5417	33.798
1460	115.171	10.6961	49.068
1461	72.6075	16.8138	24.4065
1462	93.9869	18.3084	43.9134
1463	45.1125	8.83017	27.1784
1464	73.0918	12.8681	43.9426
1465	31.8354	9.16982	34.989
1466	88.8905	13.5882	47.5754
1467	63.3549	12.5786	53.8731
1468	74.7089	19.4044	53.6254
1469	72.5313	17.3194	40.0161
1470	71.7023	14.4209	45.4103
1471	101.414	12.3793	44.1898
1472	48.8518	15.9081	51.7124
1473	111.133	7.58212	46.5855
1474	63.0141	6.0219	68.5815
1475	81.995	19.6957	58.5206
1476	67.7801	12.3629	67.7957
1477	72.5707	14.3911	38.0641
1478	92.2362	22.3376	45.9868
1479	69.4751	15.9054	59.5794
1480	69.6867	17.5175	56.9718
1481	18.9712	22.6989	34.8776
1482	56.9803	26.1499	32.5608
1483	54.4002	16.0208	51.4538
1484	33.6195	12.6592	49.9108
1485	63.9944	9.90372	60.2377
1486	61.5695	8.30073	58.462
1487	111.736	10.4822	29.3894
1488	65.3884	22.0519	43.625
1489	66.3071	15.2878	30.2127
1490	77.4022	14.0984	35.5955
1491	90.7594	19.0884	42.9416
1492	21.6296	14.222	50.6069
1493	80.1938	18.0262	36.0888
1494	68.243	20.0621	49.2899
1495	81.3855	13.1955	39.5226
1496	88.7194	17.3617	26.3611
1497	32.3101	10.9419	49.5561
1498	68.4789	16.1189	31.8602
1499	60.8922	10.215	41.1467
1500	91.5554	17.685	37.9288
1501	18.7812	18.6082	31.6757
1502	55.1191	16.7074	43.5704
1503	69.8552	18.5011	28.6217
1504	133.334	12.841	51.2227
1505	88.0706	8.24174	36.7696
1506	66.134	10.3538	44.4796
1507	57.0392	15.2046	39.4432
1508	74.8445	13.1023	43.5122
1509	92.3279	17.8255	50.2766
1510	87.9218	16.9364	55.0213
1511	68.0268	20.6806	52.8592
1512	34.7215	13.8667	53.5836
1513	98.6999	12.1101	54.9945
1514	68.8393	24.3466	42.4575
1515	86.3112	8.96103	42.0971
1516	111.084	17.1984	46.0861
1517	65.476	25.2139	47.0802
1518	79.6757	15.3208	41.8644
1519	41.0565	23.4225	54.3218
1520	74.6547	16.6476	41.5098
1521	72.1145	15.0632	42.9709
1522	118.434	13.9211	49.5405
1523	64.455	18.2685	42.8292
1524	71.7882	18.8456	47.1825
1525	74.5009	11.4902	42.2087
1526	61.8613	14.0557	41.0446
1527	85.2542	20.6025	29.9732
1528	51.0884	18.805	37.0372
1529	65.3332	18.6198	43.9552
1530	112.06	19.1106	42.1905
1531	81.4274	12.5029	34.9215
1532	66.106	13.1491	42.1881
1533	65.6042	19.6432	51.3669
1534	24.4423	9.99744	51.695
1535	77.4861	17.4678	31.047
1536	50.1066	15.5646	36.2892
1537	103.379	18.3571	25.403
1538	114.113	22.7435	46.6004
1539	85.3255	11.5443	66.7622
1540	82.6471	13.2597	42.2747
1541	55.5218	21.735	20.599
1542	60.5524	9.77107	43.8648
1543	77.4874	16.3782	46.7414
1544	45.9338	16.6897	44.6406
1545	96.7476	7.54119	32.8072
1546	102.054	17.7594	34.5225
1547	105.141	25.0903	52.8529
1548	41.2782	23.582	41.0717
1549	40.7693	17.3995	39.0406
1550	38.1031	22.2857	31.9335
1551	94.5019	20.1671	33.8619
1552	81.8229	16.3062	37.2267
1553	51.6158	24.3502	38.244
1554	43.4379	18.1196	59.3768
1555	88.5121	22.3327	52.3607
1556	36.4898	21.8931	56.1008
1557	73.5186	15.3453	44.7156
1558	42.2078	10.6174	37.221
1559	56.4561	20.4562	50.1149
1560	23.1855	20.7871	58.6305
1561	95.5456	6.84629	69.3324
1562	62.1291	17.2417	61.455
1563	79.1838	15.8465	28.5044
1564	76.9745	16.9847	21.4664
1565	66.0891	18.8982	43.7796
1566	62.536	10.2085	56.8517
1567	32.3908	14.7467	33.8277
1568	81.2352	20.9338	50.4364
1569	107.398	17.2509	46.0907
1570	84.6301	20.2188	53.7895
1571	79.3542	11.6417	27.0318
1572	59.7734	7.72218	55.657
1573	71.3329	9.37396	56.9311
1574	87.8761	18.9458	45.7495
1575	69.7594	8.79533	30.2073
1576	95.4681	21.6433	36.5053
1577	107.089	12.9884	35.8087
1578	71.6717	19.2578	48.5717
1579	70.5462	21.5539	50.369
1580	67.93	18.9302	52.4547
1581	98.0015	19.6876	40.8257
1582	72.3392	23.4287	44.3565
1583	85.7333	19.0929	45.064
1584	57.9173	11.8823	52.9528
1585	59.0632	7.59758	42.3536
1586	63.01	23.5993	41.8875
1587	111.772	20.8454	45.7299
1588	126.352	13.2233	37.7102
1589	44.8931	11.2178	60.5438
1590	50.9757	16.5582	69.4138
1591	107.402	29.2697	51.5489
1592	75.5717	9.34859	37.9179
1593	87.89	22.8122	32.1693
1594	75.6015	21.2044	39.3456
1595	79.148	12.3332	22.4629
1596	77.622	12.819	46.8734
1597	142.474	15.3669	43.1844
1598	69.8514	12.2838	73.8875
1599	74.9651	20.2843	52.4213
1600	60.0023	18.3995	44.4384
1601	38.5693	19.3988	35.0474
1602	79.3584	12.9297	29.8661
1603	75.3871	9.25737	55.6448
1604	93.9617	22.7153	44.291
1605	48.4833	16.5201	37.2417
1606	98.0253	9.76637	26.835
1607	97.9184	12.3353	26.9788
1608	53.9257	16.7856	25.1199
1609	96.1986	14.3481	48.2668
1610	42.0818	12.7557	66.0266
1611	86.0696	18.8106	47.1008
1612	58.0745	21.1823	51.2818
1613	54.7874	13.7572	43.2714
1614	70.9425	17.3743	46.7543
1615	35.6486	22.1079	39.1178
1616	72.1685	17.7558	46.5396
1617	83.6078	15.5183	53.9692
1618	81.0617	9.9234	62.7983
1619	101.718	26.1052	47.5292
1620	95.4019	20.7896	41.2227
1621	73.735	20.6762	35.5216
1622	56.1818	16.5497	47.6749
1623	51.8404	20.0785	61.0534
1624	57.8648	17.1192	22.4344
1625	97.3702	10.9226	30.3356
1626	48.4363	26.2798	51.9874
1627	72.5114	15.6408	50.9586
1628	44.9001	22.2037	38.1395
1629	50.4198	15.381	38.4022
1630	82.2995	17.1592	55.5802
1631	117.187	17.2959	37.9154
1632	51.2726	11.3452	20.862
1633	73.3931	20.9398	42.6791
1634	112.743	13.0894	81.0973
1635	20.3653	6.1442	44.6954
1636	49.9474	22.2013	40.365
1637	55.1464	24.4575	39.3506
1638	75.321	16.5375	51.4535
1639	73.3154	19.3051	31.3054
1640	67.3247	19.9297	41.9195
1641	73.586	14.6107	50.4004
1642	47.2847	16.3529	41.0894
1643	68.7581	8.95654	61.8831
1644	92.8933	21.0375	30.0277
1645	90.4798	16.0746	35.6365
1646	80.1391	16.9089	37.5806
1647	70.1168	18.3514	44.7686
1648	28.8263	21.9528	54.9991
1649	96.7974	13.322	50.5577
1650	75.0802	15.6757	43.2155
1651	23.5274	14.4979	33.8691
1652	89.1695	13.5134	40.3237
1653	80.173	15.1288	48.0382
1654	67.0369	19.5371	51.3984
1655	72.8578	20.4209	54.7244
1656	81.521	7.68411	58.0685
1657	105.051	22.6917	56.0109
1658	79.0116	15.0327	49.4384
1659	89.451	15.1069	43.347
1660	126.915	19.3219	29.8923
1661	79.4926	16.5185	44.5082
1662	73.9003	17.0882	34.3905
1663	97.9489	7.08856	60.6752
1664	26.1014	16.3299	22.2123
1665	117.39	15.7041	48.0998
1666	97.7845	10.3711	56.0805
1667	68.1858	13.1204	38.3977
1668	78.4472	12.9218	53.9883
1669	78.9451	14.2522	41.1708
1670	45.2853	19.431	26.0043
1671	101.525	14.3803	29.045
1672	95.2571	17.5837	24.5327
1673	75.6159	15.8537	57.0213
1674	99.6869	18.7833	39.4576
1675	92.5826	8.3316	29.69
1676	59.1191	18.4361	53.2678
1677	76.4114	25.7517	47.7291
1678	27.6715	12.1891	41.6664
1679	50.7197	9.12458	47.8768
1680	74.9898	22.3296	59.317
1681	101.156	18.8834	50.1444
1682	63.4446	14.5995	34.8857
1683	74.5986	15.7722	40.4252
1684	100.173	20.5677	58.1489
1685	64.7681	21.8299	42.2685
1686	61.1814	18.3562	41.2583
1687	58.2388	10.3498	44.0555
1688	62.9196	8.38007	39.6415
1689	71.0629	19.9957	38.2339
1690	86.2689	18.5997	37.8358
1691	50.8487	16.7865	39.6588
1692	99.5984	12.5074	35.2279
1693	109.661	21.9168	34.6781
1694	64.4837	18.1321	48.1803
1695	45.9494	15.444	35.876
1696	67.0292	6.19764	52.4199
1697	71.4149	16.6114	35.1794
1698	118.832	16.4223	46.1773
1699	72.8533	15.3339	44.4176
1700	74.2494	14.798	58.518
1701	93.7463	11.0608	39.228
1702	93.458	10.3466	40.7971
1703	66.3932	16.7863	45.5546
1704	102.623	15.7982	48.1999
1705	55.5835	18.2293	36.9439
1706	71.0975	15.6787	43.8868
1707	87.0872	11.3889	55.2437
1708	61.0458	12.1065	48.0314
1709	94.592	12.0231	30.3585
1710	52.7804	19.8824	64.6273
1711	130.435	15.2866	45.3035
1712	40.1845	20.2817	50.0692
1713	78.2094	20.5169	33.6082
1714	85.9389	17.5264	52.2781
1715	59.2984	11.1845	48.423
1716	109.293	14.1459	39.1714
1717	89.7282	19.4111	48.4874
1718	49.0395	16.7603	33.2831
1719	51.3762	21.8502	57.5239
1720	83.5531	18.9013	30.8919
1721	65.8641	27.2915	56.4095
1722	108.623	18.6633	51.8729
1723	39.4827	27.5202	26.0687
1724	83.8486	23.9576	47.1357
1725	62.4684	16.7078	44.0982
1726	63.4902	12.3272	28.5456
1727	72.8718	12.4395	39.4147
1728	63.8864	7.16534	30.933
1729	70.644	24.788	49.5495
1730	76.9127	22.9456	41.5958
1731	89.2156	12.0604	54.4196
1732	74.3588	15.3602	44.1439
1733	92.3851	7.90631	56.8609
1734	83.5053	15.4839	59.4095
1735	90.3117	17.026	23.5087
1736	70.0836	21.2603	43.2812
1737	31.2452	19.1625	36.8559
1738	65.755	15.072	49.0784
1739	53.136	24.4634	28.7377
1740	82.2633	19.2651	60.7664
1741	48.3893	7.46099	44.9281
1742	53.2299	20.915	46.1401
1743	83.7967	15.9766	60.5337
1744	66.4223	18.3417	45.7315
1745	73.6834	16.5788	45.2656
1746	107.561	25.8366	57.3714
1747	86.2686	15.26	49.5317
1748	27.9744	17.4819	23.8231
1749	51.2582	14.5701	44.5501
1750	67.4754	11.4889	37.0614
1751	59.855	13.0686	46.4784
1752	115.706	16.2443	53.8669
1753	48.5538	12.7463	40.9966
1754	54.3756	12.878	38.2598
1755	117.703	15.6011	52.9616
1756	84.2843	12.4884	56.8758
1757	61.667	15.1491	41.9954
1758	128.447	23.6653	54.7746
1759	72.6533	16.0131	47.8439
1760	126.4	16.1403	34.3598
1761	64.4951	21.7408	28.3234
1762	101.244	16.3498	52.368
1763	48.9987	22.4018	36.1706
1764	74.2454	16.7645	53.8952
1765	118.779	14.8464	25.1181
1766	52.5561	6.51156	37.2302
1767	83.9856	18.5574	31.7411
1768	82.5379	15.6315	55.5113
1769	67.815	13.2441	49.6654
1770	47.5521	10.141	66.824
1771	76.283	11.9336	36.0945
1772	73.9413	10.9304	25.5287
1773	46.8284	7.19855	49.8851
1774	59.141	23.261	40.8986
1775	45.1364	18.045	33.9231
1776	54.3312	14.0585	40.5713
1777	92.1525	14.8504	53.9381
1778	89.5659	18.0827	25.8914
1779	57.5691	20.6374	49.8916
1780	67.6231	12.2993	28.2878
1781	82.3075	21.7373	30.9502
1782	78.0626	11.2762	38.5185
1783	36.5166	14.9333	34.0157
1784	86.0193	17.0595	53.5175
1785	136.491	20.378	28.1997
1786	47.6945	11.2986	37.4432
1787	128.205	20.0402	29.2255
1788	76.1852	13.0052	28.1164
1789	51.947	9.80303	51.4661
1790	76.4369	11.7477	60.9415
1791	86.4398	15.4038	37.2418
1792	61.7636	19.6188	66.5658
1793	99.4936	16.6522	30.9263
1794	83.4674	20.9148	44.1998
1795	89.7379	16.11	35.9001
1796	87.3124	13.1415	56.2837
1797	98.5554	13.2553	48.6251
1798	87.1249	14.1582	52.2803
1799	74.9103	15.4663	43.5629
1800	71.5085	14.1126	45.374
1801	84.6052	18.7287	37.4618
1802	84.9805	18.0971	54.6479
1803	120.609	9.24232	49.0588
1804	90.1211	17.129	44.2961
1805	77.258	15.8184	51.3857
1806	59.1782	17.973	45.1957
1807	79.7195	20.4356	50.3704
1808	60.5237	11.7597	35.3785
1809	68.8711	19.9015	22.8754
1810	80.8741	19.1527	41.3297
1811	69.1076	23.6425	44.9718
1812	47.0022	15.7662	46.9923
1813	34.0907	15.0596	44.5625
1814	81.1604	20.1821	52.0164
1815	77.0274	18.798	35.2867
1816	79.3314	11.0547	22.174
1817	78.792	12.1935	43.5903
1818	79.7826	7.48457	44.9956
1819	96.1755	19.0654	39.5012
1820	68.4701	21.57	26.5922
1821	68.0146	18.9505	51.6053
1822	126.983	13.2414	41.0655
1823	35.507	17.1738	36.6287
1824	127.792	8.51569	50.8878
1825	81.9012	21.3728	43.9337
1826	34.1359	23.2936	55.3884
1827	65.2553	16.6713	39.7311
1828	74.0747	18.3557	49.859
1829	77.9376	13.4276	39.2435
1830	115.809	16.1755	46.2612
1831	57.1774	13.7409	52.0856
1832	47.6051	12.7272	54.0552
1833	95.9815	16.0154	41.8302
1834	56.0809	14.3187	35.285
1835	38.0402	10.9773	34.8768
1836	34.233	22.1625	28.2694
1837	32.0158	8.09231	65.571
1838	107.147	18.7103	39.8667
1839	83.598	19.7825	37.2501
1840	67.1841	21.0449	54.4489
1841	82.929	11.81	65.7365
1842	61.6127	13.2193	44.5422
1843	73.7315	10.5606	49.1481
1844	103.269	22.7753	45.5586
1845	68.3142	19.1676	45.2683
1846	56.2727	9.65287	35.2897
1847	107.386	9.5047	58.0079
1848	96.7924	12.0287	32.2886
1849	53.2449	17.7368	23.6028
1850	46.7772	13.539	45.8311
1851	74.345	11.2319	57.534
1852	108.896	15.7422	39.3562
1853	40.7006	13.2837	26.5741
1854	36.0786	12.212	45.028
1855	62.1368	15.0837	55.771
1856	61.9306	13.9591	51.8721
1857	87.514	13.496	46.6246
1858	63.5043	12.7997	41.9393
1859	63.9792	26.9566	29.3526
1860	86.9192	13.4816	57.4768
1861	50.0638	17.0655	61.4839
1862	68.971	16.2613	46.926
1863	71.4713	14.4729	34.245
1864	51.8891	15.9961	42.9323
1865	66.1647	16.5372	56.2249
1866	73.6487	15.5665	40.7905
1867	86.189	15.3881	40.431
1868	73.0835	12.4502	57.6355
1869	73.1947	14.3708	37.1336
1870	92.5046	18.4806	24.5556
1871	76.3477	16.3638	30.3238
1872	51.5882	16.0647	59.9616
1873	68.2052	14.5149	52.2127
1874	74.3953	19.6069	59.6194
1875	66.9449	15.0366	28.3328
1876	50.9526	17.2501	30.9009
1877	126.121	19.5793	65.2512
1878	76.6133	17.6976	29.333
1879	55.6707	16.5641	47.445
1880	66.6726	16.4224	53.2469
1881	88.8985	15.9078	38.5974
1882	89.6758	12.0972	40.0007
1883	61.6077	15.0728	53.6878
1884	109.257	19.1469	56.0227
1885	60.4519	17.3182	49.335
1886	60.1404	17.938	51.5388
1887	74.4941	15.0832	44.0691
1888	68.3839	13.2129	36.007
1889	119.301	17.5655	28.1292
1890	75.6798	14.1115	21.5329
1891	81.7965	10.7384	32.8118
1892	60.3835	12.1102	30.6369
1893	102.406	23.7306	57.3396
1894	59.4559	13.0392	50.7044
1895	29.4872	17.3203	31.3306
1896	69.9582	13.0864	53.0115
1897	70.6571	16.0685	47.3641
1898	117.687	23.196	38.6191
1899	80.5862	26.6831	34.2318
1900	97.1395	14.0263	35.4845
1901	65.2285	20.7712	36.5053
1902	109.259	11.0027	29.3587
1903	109.518	26.0675	32.4873
1904	101.458	12.8751	33.5959
1905	56.2492	21.8702	21.9883
1906	93.2241	22.9429	36.2153
1907	80.6645	11.009	49.481
1908	101.599	11.3169	44.4511
1909	91.5312	9.04089	46.4114
1910	78.4451	18.5607	35.2278
1911	67.2507	16.7552	64.558
1912	50.3511	10.8021	34.5213
1913	86.8673	10.1667	48.7061
1914	74.5863	12.3531	46.8291
1915	65.0783	10.0417	68.1012
1916	54.3181	15.3559	44.8738
1917	71.5171	14.4188	29.4169
1918	55.6025	9.0474	33.6571
1919	48.9756	7.98667	30.7311
1920	78.1544	15.0462	57.9668
1921	69.1124	13.9021	43.372
1922	113.044	18.7459	31.2363
1923	46.7507	14.7386	53.3502
1924	98.7557	14.355	41.6779
1925	68.4027	12.3657	26.3481
1926	67.8617	19.6385	44.1271
1927	25.4354	13.0217	37.996
1928	91.9727	24.113	40.0783
1929	62.4337	9.74836	45.2368
1930	65.4704	12.4172	26.704
1931	82.1966	13.3023	27.4276
1932	94.7547	18.4644	35.7691
1933	133.826	6.02491	50.0036
1934	107.861	11.3345	25.9641
1935	41.9685	17.4663	56.2565
1936	105.005	15.7788	42.4598
1937	77.7044	17.6767	56.8015
1938	90.047	17.6113	49.8254
1939	45.78	12.257	34.9723
1940	74.0373	14.7895	39.7948
1941	82.1171	19.4333	33.8772
1942	71.2676	14.0518	27.8043
1943	66.9702	25.1785	58.2034
1944	73.7447	11.6902	45.4973
1945	62.9769	19.291	24.0826
1946	60.4483	18.1075	42.0161
1947	93.2057	19.1802	42.5982
1948	59.8587	10.2566	30.3074
1949	104.302	18.7424	45.6085
1950	60.3753	10.4197	55.5559
1951	73.9917	14.1642	21.2558
1952	66.0506	16.5926	46.3573
1953	59.4394	26.0986	67.3565
1954	22.1233	16.572	54.321
1955	62.6328	16.1893	43.8812
1956	74.5069	21.0497	34.0751
1957	87.3565	15.5141	41.267
1958	71.8849	14.0425	46.4278
1959	64.6105	9.54185	50.175
1960	52.7993	21.323	24.7424
1961	65.6614	23.1306	52.7431
1962	105.471	11.0602	45.488
1963	50.2959	13.7748	52.431
1964	61.1759	14.3953	50.1687
1965	73.5063	18.1896	49.1384
1966	66.8557	5.95789	21.0189
1967	76.0144	18.1519	48.6119
1968	66.6819	16.242	48.8898
1969	37.6543	16.3381	42.841
1970	88.2841	15.2283	51.8721
1971	85.3663	18.0316	26.5107
1972	104.12	17.581	74.1228
1973	25.2992	20.9057	49.8602
1974	61.3715	20.9153	33.2355
1975	61.3139	12.2365	39.9311
1976	122.879	10.5659	38.6935
1977	67.5901	8.12754	57.2749
1978	71.5624	8.48206	35.7805
1979	50.8871	12.5464	34.6697
1980	84.7429	15.1716	38.5629
1981	52.3244	14.6239	66.3802
1982	48.286	8.80979	35.8326
1983	44.7497	31.3303	21.1833
1984	112.535	15.8863	40.5864
1985	111.036	20.5332	20.1915
1986	80.0692	14.9818	35.8093
1987	70.412	16.9052	56.7175
1988	35.7977	8.25409	35.655
1989	99.5722	14.948	57.538
1990	96.7197	21.7371	31.1366
1991	85.9739	19.314	30.8485
1992	80.6692	22.012	41.7527
1993	82.0966	18.7919	51.6557
1994	73.7335	19.8323	43.5268
1995	34.3793	13.5386	55.7665
1996	55.9738	17.2861	46.7174
1997	97.1736	18.7266	50.2812
1998	74.604	19.7183	31.9925
1999	112.613	18.0062	24.1494
[truncated: 8,001 more rows]

## Sheet: Simulation Output Values 1
Sim #	ADD	ADDc	CR	HQ
1	2.05896e-05	1.57046e-05	1.04697e-05	0.0686319
2	1.9918e-05	1.51924e-05	1.01283e-05	0.0663935
3	4.65176e-05	3.5481e-05	2.3654e-05	0.155059
4	3.30736e-05	2.52267e-05	1.68178e-05	0.110245
5	2.45127e-05	1.8697e-05	1.24646e-05	0.0817091
6	2.87403e-05	2.19215e-05	1.46143e-05	0.095801
7	2.37255e-05	1.80965e-05	1.20643e-05	0.079085
8	1.53227e-05	1.16873e-05	7.79152e-06	0.0510755
9	2.24992e-05	1.71611e-05	1.14408e-05	0.0749972
10	3.46794e-05	2.64515e-05	1.76343e-05	0.115598
11	3.20743e-05	2.44645e-05	1.63097e-05	0.106914
12	3.38556e-05	2.58232e-05	1.72154e-05	0.112852
13	2.06903e-05	1.57815e-05	1.0521e-05	0.0689678
14	5.34605e-05	4.07767e-05	2.71845e-05	0.178202
15	4.63171e-05	3.53282e-05	2.35521e-05	0.15439
16	3.96293e-05	3.0227e-05	2.01514e-05	0.132098
17	2.71018e-05	2.06718e-05	1.37812e-05	0.0903394
18	3.20965e-05	2.44815e-05	1.6321e-05	0.106988
19	2.55306e-05	1.94734e-05	1.29822e-05	0.0851021
20	5.29526e-05	4.03893e-05	2.69262e-05	0.176509
21	5.22609e-05	3.98617e-05	2.65745e-05	0.174203
22	5.4349e-05	4.14545e-05	2.76363e-05	0.181163
23	2.10408e-05	1.60487e-05	1.06992e-05	0.0701359
24	5.71315e-05	4.35767e-05	2.90512e-05	0.190438
25	3.40847e-05	2.59979e-05	1.7332e-05	0.113616
26	4.56564e-05	3.48242e-05	2.32161e-05	0.152188
27	4.7094e-05	3.59207e-05	2.39471e-05	0.15698
28	2.02707e-05	1.54614e-05	1.03076e-05	0.067569
29	3.47516e-05	2.65066e-05	1.76711e-05	0.115839
30	3.12442e-05	2.38314e-05	1.58876e-05	0.104147
31	2.16181e-05	1.64891e-05	1.09927e-05	0.0720604
32	3.69636e-05	2.81938e-05	1.87959e-05	0.123212
33	3.4186e-05	2.60752e-05	1.73835e-05	0.113953
34	2.19026e-05	1.67061e-05	1.11374e-05	0.0730088
35	3.27457e-05	2.49766e-05	1.66511e-05	0.109152
36	2.93664e-05	2.23991e-05	1.49327e-05	0.0978881
37	3.71231e-05	2.83154e-05	1.8877e-05	0.123744
38	3.1168e-05	2.37732e-05	1.58488e-05	0.103893
39	1.77848e-05	1.35652e-05	9.04349e-06	0.0592825
40	2.99492e-05	2.28436e-05	1.52291e-05	0.0998307
41	1.56181e-05	1.19126e-05	7.94173e-06	0.0520602
42	2.55296e-05	1.94726e-05	1.29817e-05	0.0850986
43	3.89429e-05	2.97035e-05	1.98024e-05	0.12981
44	4.50131e-05	3.43336e-05	2.2889e-05	0.150044
45	2.80386e-05	2.13863e-05	1.42575e-05	0.0934619
46	2.46385e-05	1.87929e-05	1.25286e-05	0.0821282
47	1.49566e-05	1.14081e-05	7.60539e-06	0.0498554
48	3.68631e-05	2.81171e-05	1.87448e-05	0.122877
49	3.02078e-05	2.30409e-05	1.53606e-05	0.100693
50	6.46529e-05	4.93137e-05	3.28758e-05	0.21551
51	2.97785e-05	2.27134e-05	1.51423e-05	0.0992617
52	3.86748e-05	2.9499e-05	1.9666e-05	0.128916
53	1.5893e-05	1.21223e-05	8.08156e-06	0.0529768
54	2.02006e-05	1.54079e-05	1.02719e-05	0.0673352
55	1.88726e-05	1.4395e-05	9.59667e-06	0.0629088
56	2.34865e-05	1.79142e-05	1.19428e-05	0.0782883
57	2.25067e-05	1.71669e-05	1.14446e-05	0.0750222
58	2.57166e-05	1.96152e-05	1.30768e-05	0.0857221
59	4.12822e-05	3.14878e-05	2.09919e-05	0.137607
60	2.22283e-05	1.69545e-05	1.1303e-05	0.0740942
61	3.52519e-05	2.68882e-05	1.79255e-05	0.117506
62	8.85185e-05	6.75171e-05	4.50114e-05	0.295062
63	1.86301e-05	1.421e-05	9.47332e-06	0.0621002
64	1.65253e-05	1.26046e-05	8.40306e-06	0.0550843
65	1.69884e-05	1.29578e-05	8.63853e-06	0.0566279
66	3.08123e-05	2.35019e-05	1.56679e-05	0.102708
67	2.68734e-05	2.04976e-05	1.3665e-05	0.089578
68	3.60209e-05	2.74748e-05	1.83165e-05	0.12007
69	5.29043e-05	4.03525e-05	2.69017e-05	0.176348
70	2.56196e-05	1.95412e-05	1.30275e-05	0.0853987
71	2.45171e-05	1.87003e-05	1.24669e-05	0.0817238
72	3.21729e-05	2.45398e-05	1.63598e-05	0.107243
73	8.36754e-05	6.3823e-05	4.25487e-05	0.278918
74	3.39922e-05	2.59274e-05	1.72849e-05	0.113307
75	3.66611e-05	2.79631e-05	1.86421e-05	0.122204
76	4.02221e-05	3.06792e-05	2.04528e-05	0.134074
77	1.7647e-05	1.34602e-05	8.97345e-06	0.0588234
78	1.76283e-05	1.34459e-05	8.96395e-06	0.0587611
79	2.17448e-05	1.65857e-05	1.10572e-05	0.0724826
80	1.80178e-05	1.3743e-05	9.16198e-06	0.0600592
81	3.52518e-05	2.68881e-05	1.79254e-05	0.117506
82	4.79461e-05	3.65707e-05	2.43804e-05	0.15982
83	2.8297e-05	2.15834e-05	1.43889e-05	0.0943232
84	3.33004e-05	2.53997e-05	1.69331e-05	0.111001
85	1.34141e-05	1.02315e-05	6.82103e-06	0.0447137
86	3.42518e-05	2.61254e-05	1.74169e-05	0.114173
87	3.67793e-05	2.80532e-05	1.87022e-05	0.122598
88	2.74104e-05	2.09071e-05	1.39381e-05	0.0913679
89	5.13648e-05	3.91782e-05	2.61188e-05	0.171216
90	4.39023e-05	3.34863e-05	2.23242e-05	0.146341
91	3.71532e-05	2.83384e-05	1.88923e-05	0.123844
92	4.85614e-05	3.704e-05	2.46933e-05	0.161871
93	3.59169e-05	2.73954e-05	1.82636e-05	0.119723
94	3.48269e-05	2.6564e-05	1.77093e-05	0.11609
95	2.77007e-05	2.11286e-05	1.40857e-05	0.0923357
96	4.38898e-05	3.34767e-05	2.23178e-05	0.146299
97	2.43376e-05	1.85634e-05	1.23756e-05	0.0811254
98	3.97164e-05	3.02935e-05	2.01957e-05	0.132388
99	1.16846e-05	8.91239e-06	5.94159e-06	0.0389487
100	3.19185e-05	2.43457e-05	1.62304e-05	0.106395
101	2.84376e-05	2.16907e-05	1.44604e-05	0.0947921
102	2.05878e-05	1.57032e-05	1.04688e-05	0.068626
103	1.94915e-05	1.48671e-05	9.91137e-06	0.0649717
104	1.82405e-05	1.39128e-05	9.27521e-06	0.0608015
105	2.0988e-05	1.60085e-05	1.06723e-05	0.0699599
106	2.15217e-05	1.64156e-05	1.09437e-05	0.0717391
107	4.83369e-05	3.68687e-05	2.45791e-05	0.161123
108	3.84882e-05	2.93567e-05	1.95711e-05	0.128294
109	6.16247e-05	4.70039e-05	3.1336e-05	0.205416
110	1.88034e-05	1.43422e-05	9.56148e-06	0.0626781
111	4.0053e-05	3.05502e-05	2.03668e-05	0.13351
112	4.88342e-05	3.72481e-05	2.4832e-05	0.162781
113	5.53479e-05	4.22163e-05	2.81442e-05	0.184493
114	3.3496e-05	2.55489e-05	1.70326e-05	0.111653
115	1.86557e-05	1.42295e-05	9.48635e-06	0.0621856
116	2.52232e-05	1.92389e-05	1.28259e-05	0.0840775
117	2.13899e-05	1.63151e-05	1.08767e-05	0.0712998
118	4.44133e-05	3.3876e-05	2.2584e-05	0.148044
119	3.11784e-05	2.37812e-05	1.58541e-05	0.103928
120	2.30936e-05	1.76146e-05	1.1743e-05	0.0769788
121	1.7166e-05	1.30933e-05	8.72885e-06	0.0572199
122	4.03249e-05	3.07576e-05	2.05051e-05	0.134416
123	2.87396e-05	2.1921e-05	1.4614e-05	0.0957988
124	3.59254e-05	2.7402e-05	1.8268e-05	0.119751
125	6.76523e-05	5.16014e-05	3.4401e-05	0.225508
126	1.8533e-05	1.4136e-05	9.42398e-06	0.0617767
127	3.03727e-05	2.31666e-05	1.54444e-05	0.101242
128	1.34949e-05	1.02932e-05	6.8621e-06	0.0449829
129	2.65352e-05	2.02396e-05	1.34931e-05	0.0884507
130	7.01863e-05	5.35343e-05	3.56895e-05	0.233954
131	1.59845e-05	1.21921e-05	8.12807e-06	0.0532817
132	3.63222e-05	2.77046e-05	1.84697e-05	0.121074
133	5.38845e-05	4.11001e-05	2.74001e-05	0.179615
134	3.94586e-05	3.00969e-05	2.00646e-05	0.131529
135	3.09482e-05	2.36056e-05	1.57371e-05	0.103161
136	3.2864e-05	2.50668e-05	1.67112e-05	0.109547
137	4.40753e-05	3.36182e-05	2.24121e-05	0.146918
138	1.89921e-05	1.44861e-05	9.6574e-06	0.0633069
139	8.21186e-05	6.26355e-05	4.1757e-05	0.273729
140	2.326e-05	1.77415e-05	1.18277e-05	0.0775335
141	3.62916e-05	2.76813e-05	1.84542e-05	0.120972
142	4.82921e-05	3.68346e-05	2.45564e-05	0.160974
143	3.1405e-05	2.3954e-05	1.59694e-05	0.104683
144	1.4274e-05	1.08874e-05	7.25826e-06	0.0475799
145	6.04301e-05	4.60928e-05	3.07285e-05	0.201434
146	2.05149e-05	1.56477e-05	1.04318e-05	0.0683831
147	2.74658e-05	2.09494e-05	1.39663e-05	0.0915528
148	2.36517e-05	1.80402e-05	1.20268e-05	0.0788391
149	4.8476e-05	3.69748e-05	2.46499e-05	0.161587
150	4.38252e-05	3.34275e-05	2.2285e-05	0.146084
151	3.77038e-05	2.87584e-05	1.91722e-05	0.125679
152	3.23208e-05	2.46525e-05	1.6435e-05	0.107736
153	5.37069e-05	4.09646e-05	2.73098e-05	0.179023
154	2.61722e-05	1.99627e-05	1.33085e-05	0.0872405
155	5.53527e-05	4.222e-05	2.81467e-05	0.184509
156	2.41057e-05	1.83865e-05	1.22576e-05	0.0803522
157	1.98325e-05	1.51271e-05	1.00847e-05	0.0661082
158	3.63965e-05	2.77613e-05	1.85075e-05	0.121322
159	4.89652e-05	3.73479e-05	2.48986e-05	0.163217
160	3.25141e-05	2.48e-05	1.65333e-05	0.10838
161	4.25234e-05	3.24345e-05	2.1623e-05	0.141745
162	3.6241e-05	2.76427e-05	1.84285e-05	0.120803
163	3.60136e-05	2.74692e-05	1.83128e-05	0.120045
164	2.98926e-05	2.28004e-05	1.52003e-05	0.0996421
165	3.53065e-05	2.69299e-05	1.79533e-05	0.117688
166	3.38755e-05	2.58384e-05	1.72256e-05	0.112918
167	1.20589e-05	9.19784e-06	6.1319e-06	0.0401962
168	3.64031e-05	2.77663e-05	1.85109e-05	0.121344
169	3.85547e-05	2.94074e-05	1.9605e-05	0.128516
170	4.42396e-05	3.37435e-05	2.24957e-05	0.147465
171	2.1467e-05	1.63739e-05	1.09159e-05	0.0715567
172	3.50146e-05	2.67072e-05	1.78048e-05	0.116715
173	1.42197e-05	1.0846e-05	7.23069e-06	0.0473992
174	4.77315e-05	3.6407e-05	2.42713e-05	0.159105
175	2.77518e-05	2.11676e-05	1.41117e-05	0.0925061
176	4.66988e-05	3.56193e-05	2.37462e-05	0.155663
177	2.79024e-05	2.12824e-05	1.41883e-05	0.093008
178	4.79373e-05	3.65639e-05	2.4376e-05	0.159791
179	9.28769e-06	7.08414e-06	4.72276e-06	0.030959
180	2.29392e-05	1.74968e-05	1.16645e-05	0.0764641
181	2.10945e-05	1.60897e-05	1.07265e-05	0.070315
182	8.80412e-05	6.7153e-05	4.47687e-05	0.293471
183	1.84812e-05	1.40964e-05	9.39763e-06	0.061604
184	1.13718e-05	8.67376e-06	5.78251e-06	0.0379059
185	4.27698e-05	3.26225e-05	2.17483e-05	0.142566
186	3.09885e-05	2.36364e-05	1.57576e-05	0.103295
187	3.13627e-05	2.39218e-05	1.59479e-05	0.104542
188	6.16053e-05	4.69892e-05	3.13261e-05	0.205351
189	3.76814e-05	2.87413e-05	1.91609e-05	0.125605
190	0.000103485	7.89327e-05	5.26218e-05	0.34495
191	4.17097e-05	3.18139e-05	2.12093e-05	0.139032
192	9.70813e-05	7.40483e-05	4.93655e-05	0.323604
193	2.29367e-05	1.74948e-05	1.16632e-05	0.0764556
194	1.91682e-05	1.46204e-05	9.74695e-06	0.0638939
195	3.30329e-05	2.51957e-05	1.67971e-05	0.11011
196	2.90369e-05	2.21477e-05	1.47651e-05	0.0967895
197	1.77393e-05	1.35305e-05	9.02036e-06	0.0591309
198	2.94603e-05	2.24707e-05	1.49805e-05	0.0982011
199	1.17848e-05	8.9888e-06	5.99253e-06	0.0392827
200	1.98213e-05	1.51186e-05	1.00791e-05	0.0660711
201	3.9395e-05	3.00483e-05	2.00322e-05	0.131317
202	3.37545e-05	2.57461e-05	1.7164e-05	0.112515
203	3.20581e-05	2.44521e-05	1.63014e-05	0.10686
204	3.41173e-05	2.60228e-05	1.73485e-05	0.113724
205	2.44826e-05	1.8674e-05	1.24493e-05	0.0816087
206	2.78272e-05	2.12251e-05	1.41501e-05	0.0927575
207	3.60751e-05	2.75161e-05	1.83441e-05	0.12025
208	7.38943e-05	5.63625e-05	3.7575e-05	0.246314
209	3.09261e-05	2.35887e-05	1.57258e-05	0.103087
210	1.58278e-05	1.20726e-05	8.04839e-06	0.0527594
211	8.40889e-05	6.41384e-05	4.27589e-05	0.280296
212	1.4978e-05	1.14244e-05	7.61628e-06	0.0499268
213	3.31734e-05	2.53029e-05	1.68686e-05	0.110578
214	2.26593e-05	1.72833e-05	1.15222e-05	0.075531
215	4.0844e-05	3.11536e-05	2.07691e-05	0.136147
216	1.70828e-05	1.30298e-05	8.68653e-06	0.0569426
217	3.6472e-05	2.78188e-05	1.85459e-05	0.121573
218	2.04265e-05	1.55802e-05	1.03868e-05	0.0680884
219	5.5114e-05	4.20379e-05	2.80253e-05	0.183713
220	3.7921e-05	2.8924e-05	1.92827e-05	0.126403
221	2.18604e-05	1.66739e-05	1.11159e-05	0.0728679
222	5.65395e-05	4.31252e-05	2.87502e-05	0.188465
223	3.23854e-05	2.47018e-05	1.64678e-05	0.107951
224	1.09967e-05	8.38765e-06	5.59176e-06	0.0366555
225	4.44236e-05	3.38839e-05	2.25892e-05	0.148079
226	1.68526e-05	1.28542e-05	8.56948e-06	0.0561752
227	2.51034e-05	1.91475e-05	1.2765e-05	0.0836778
228	2.50848e-05	1.91333e-05	1.27556e-05	0.0836161
229	2.78074e-05	2.121e-05	1.414e-05	0.0926913
230	4.13971e-05	3.15754e-05	2.10503e-05	0.13799
231	3.77722e-05	2.88106e-05	1.9207e-05	0.125907
232	3.55048e-05	2.70811e-05	1.80541e-05	0.118349
233	5.45032e-05	4.15721e-05	2.77147e-05	0.181677
234	8.83767e-05	6.74089e-05	4.49393e-05	0.294589
235	1.98964e-05	1.51759e-05	1.01172e-05	0.0663212
236	5.28555e-05	4.03153e-05	2.68769e-05	0.176185
237	4.64902e-05	3.54602e-05	2.36401e-05	0.154967
238	2.84337e-05	2.16877e-05	1.44584e-05	0.094779
239	5.08061e-05	3.87521e-05	2.58348e-05	0.169354
240	2.02488e-05	1.54447e-05	1.02965e-05	0.0674961
241	2.15683e-05	1.64511e-05	1.09674e-05	0.0718942
242	2.26499e-05	1.72761e-05	1.15174e-05	0.0754996
243	2.36995e-05	1.80767e-05	1.20511e-05	0.0789985
244	2.97495e-05	2.26913e-05	1.51275e-05	0.0991651
245	1.88475e-05	1.43759e-05	9.58391e-06	0.0628251
246	2.75082e-05	2.09818e-05	1.39878e-05	0.0916941
247	1.87715e-05	1.43179e-05	9.54524e-06	0.0625716
248	2.54706e-05	1.94276e-05	1.29517e-05	0.0849022
249	1.8956e-05	1.44586e-05	9.63905e-06	0.0631866
250	2.09645e-05	1.59906e-05	1.06604e-05	0.0698818
251	6.71383e-05	5.12094e-05	3.41396e-05	0.223794
252	6.18512e-05	4.71767e-05	3.14511e-05	0.206171
253	3.01533e-05	2.29993e-05	1.53329e-05	0.100511
254	2.73872e-05	2.08895e-05	1.39263e-05	0.0912908
255	6.03871e-05	4.606e-05	3.07067e-05	0.20129
256	6.99899e-05	5.33844e-05	3.55896e-05	0.2333
257	4.1296e-05	3.14984e-05	2.09989e-05	0.137653
258	2.6186e-05	1.99732e-05	1.33155e-05	0.0872865
259	9.74045e-06	7.42948e-06	4.95299e-06	0.0324682
260	3.94289e-05	3.00742e-05	2.00495e-05	0.13143
261	5.08083e-05	3.87538e-05	2.58359e-05	0.169361
262	2.86876e-05	2.18814e-05	1.45876e-05	0.0956255
263	4.19722e-05	3.20141e-05	2.13427e-05	0.139907
264	3.69612e-05	2.8192e-05	1.87946e-05	0.123204
265	4.92146e-05	3.75382e-05	2.50255e-05	0.164049
266	2.69432e-05	2.05508e-05	1.37005e-05	0.0898106
267	2.00453e-05	1.52894e-05	1.0193e-05	0.0668176
268	2.53515e-05	1.93367e-05	1.28912e-05	0.0845051
269	5.20835e-05	3.97264e-05	2.64843e-05	0.173612
270	3.00909e-05	2.29517e-05	1.53011e-05	0.100303
271	4.06816e-05	3.10297e-05	2.06865e-05	0.135605
272	5.23223e-05	3.99086e-05	2.66057e-05	0.174408
273	5.54482e-05	4.22929e-05	2.81952e-05	0.184827
274	1.54167e-05	1.1759e-05	7.83932e-06	0.0513889
275	0.000144569	0.000110269	7.35127e-05	0.481895
276	2.87859e-05	2.19563e-05	1.46375e-05	0.095953
277	3.06146e-05	2.33511e-05	1.55674e-05	0.102049
278	4.44124e-05	3.38753e-05	2.25835e-05	0.148041
279	2.34679e-05	1.79e-05	1.19333e-05	0.0782262
280	3.19134e-05	2.43418e-05	1.62278e-05	0.106378
281	7.70843e-05	5.87957e-05	3.91971e-05	0.256948
282	2.60628e-05	1.98793e-05	1.32529e-05	0.0868762
283	1.8959e-05	1.44609e-05	9.64058e-06	0.0631966
284	2.85934e-05	2.18095e-05	1.45397e-05	0.0953114
285	2.54108e-05	1.9382e-05	1.29213e-05	0.0847027
286	5.49568e-05	4.1918e-05	2.79453e-05	0.183189
287	6.67005e-05	5.08755e-05	3.3917e-05	0.222335
288	1.76068e-05	1.34295e-05	8.95302e-06	0.0586895
289	3.02054e-05	2.30391e-05	1.53594e-05	0.100685
290	2.47043e-05	1.88431e-05	1.25621e-05	0.0823478
291	3.10168e-05	2.36579e-05	1.5772e-05	0.103389
292	3.50891e-05	2.6764e-05	1.78427e-05	0.116964
293	1.09335e-05	8.33946e-06	5.55964e-06	0.0364449
294	4.89228e-05	3.73156e-05	2.48771e-05	0.163076
295	0.000112101	8.55046e-05	5.70031e-05	0.37367
296	3.92502e-05	2.99379e-05	1.99586e-05	0.130834
297	1.89139e-05	1.44265e-05	9.61766e-06	0.0630464
298	4.01579e-05	3.06302e-05	2.04201e-05	0.13386
299	1.92739e-05	1.47011e-05	9.80073e-06	0.0642464
300	3.0271e-05	2.30891e-05	1.53927e-05	0.100903
301	1.39825e-05	1.06651e-05	7.11008e-06	0.0466085
302	2.56798e-05	1.95871e-05	1.30581e-05	0.0855993
303	2.83946e-05	2.16578e-05	1.44386e-05	0.0946487
304	2.04684e-05	1.56122e-05	1.04081e-05	0.0682282
305	2.82914e-05	2.15791e-05	1.43861e-05	0.0943048
306	3.36373e-05	2.56567e-05	1.71045e-05	0.112124
307	2.99339e-05	2.2832e-05	1.52213e-05	0.0997797
308	1.52756e-05	1.16514e-05	7.7676e-06	0.0509187
309	1.70009e-05	1.29674e-05	8.64493e-06	0.0566698
310	4.47643e-05	3.41438e-05	2.27625e-05	0.149214
311	8.94649e-05	6.82389e-05	4.54926e-05	0.298216
312	3.2706e-05	2.49463e-05	1.66309e-05	0.10902
313	4.49759e-05	3.43051e-05	2.28701e-05	0.14992
314	3.29584e-05	2.51389e-05	1.67593e-05	0.109861
315	1.6344e-05	1.24663e-05	8.31089e-06	0.0544801
316	3.14224e-05	2.39673e-05	1.59782e-05	0.104741
317	2.65661e-05	2.02631e-05	1.35088e-05	0.0885536
318	2.37134e-05	1.80873e-05	1.20582e-05	0.0790448
319	4.48521e-05	3.42107e-05	2.28071e-05	0.149507
320	2.58208e-05	1.96947e-05	1.31298e-05	0.0860692
321	2.74802e-05	2.09604e-05	1.39736e-05	0.0916005
322	3.29204e-05	2.51098e-05	1.67399e-05	0.109735
323	2.47022e-05	1.88415e-05	1.2561e-05	0.0823408
324	1.02845e-05	7.84449e-06	5.22966e-06	0.0342818
325	2.98122e-05	2.27391e-05	1.51594e-05	0.0993739
326	3.81413e-05	2.90921e-05	1.93947e-05	0.127138
327	2.15464e-05	1.64344e-05	1.09563e-05	0.0718212
328	6.03186e-05	4.60077e-05	3.06718e-05	0.201062
329	5.43848e-05	4.14817e-05	2.76545e-05	0.181283
330	3.24603e-05	2.4759e-05	1.6506e-05	0.108201
331	1.13652e-05	8.66874e-06	5.77916e-06	0.037884
332	2.14624e-05	1.63704e-05	1.09136e-05	0.0715415
333	2.46977e-05	1.88381e-05	1.25587e-05	0.0823258
334	2.02252e-05	1.54267e-05	1.02844e-05	0.0674173
335	4.18176e-05	3.18961e-05	2.12641e-05	0.139392
336	3.58921e-05	2.73765e-05	1.8251e-05	0.11964
337	3.64305e-05	2.77872e-05	1.85248e-05	0.121435
338	3.74623e-05	2.85742e-05	1.90494e-05	0.124874
339	1.51296e-05	1.15401e-05	7.69337e-06	0.0504321
340	2.50683e-05	1.91207e-05	1.27471e-05	0.0835609
341	1.3668e-05	1.04252e-05	6.95016e-06	0.0455601
342	4.49119e-05	3.42563e-05	2.28376e-05	0.149706
343	7.25356e-05	5.53262e-05	3.68841e-05	0.241785
344	1.90978e-05	1.45667e-05	9.71115e-06	0.0636592
345	1.68084e-05	1.28205e-05	8.54703e-06	0.0560281
346	2.07425e-05	1.58213e-05	1.05475e-05	0.0691418
347	4.20999e-05	3.21115e-05	2.14077e-05	0.140333
348	3.19657e-05	2.43817e-05	1.62545e-05	0.106552
349	3.56088e-05	2.71605e-05	1.8107e-05	0.118696
350	0.000123698	9.43504e-05	6.29003e-05	0.412328
351	4.93e-05	3.76034e-05	2.50689e-05	0.164333
352	2.71772e-05	2.07293e-05	1.38195e-05	0.0905908
353	8.9055e-06	6.79262e-06	4.52842e-06	0.029685
354	2.81319e-05	2.14575e-05	1.4305e-05	0.0937729
355	5.8021e-05	4.42552e-05	2.95035e-05	0.193403
356	2.37262e-05	1.8097e-05	1.20647e-05	0.0790873
357	3.01218e-05	2.29753e-05	1.53168e-05	0.100406
358	1.45327e-05	1.10848e-05	7.38984e-06	0.0484424
359	3.47111e-05	2.64757e-05	1.76505e-05	0.115704
360	6.52589e-05	4.97759e-05	3.3184e-05	0.21753
361	6.19163e-05	4.72264e-05	3.14843e-05	0.206388
362	4.09322e-05	3.12208e-05	2.08139e-05	0.136441
363	9.64955e-05	7.36015e-05	4.90677e-05	0.321652
364	3.70288e-05	2.82435e-05	1.8829e-05	0.123429
365	0.000120776	9.21216e-05	6.14144e-05	0.402588
366	2.72296e-05	2.07692e-05	1.38461e-05	0.0907652
367	0.000138048	0.000105295	7.0197e-05	0.46016
368	1.4243e-05	1.08638e-05	7.24253e-06	0.0474768
369	3.68119e-05	2.80781e-05	1.87188e-05	0.122706
370	3.60564e-05	2.75018e-05	1.83346e-05	0.120188
371	2.83564e-05	2.16287e-05	1.44191e-05	0.0945214
372	3.75789e-05	2.86631e-05	1.91087e-05	0.125263
373	1.38298e-05	1.05486e-05	7.03238e-06	0.0460992
374	5.3462e-05	4.07779e-05	2.71852e-05	0.178207
375	2.27082e-05	1.73205e-05	1.1547e-05	0.0756938
376	3.00411e-05	2.29137e-05	1.52758e-05	0.100137
377	5.74252e-05	4.38008e-05	2.92005e-05	0.191417
378	3.80798e-05	2.90452e-05	1.93635e-05	0.126933
379	1.54174e-05	1.17595e-05	7.83968e-06	0.0513912
380	4.49843e-05	3.43116e-05	2.28744e-05	0.149948
381	4.63695e-05	3.53681e-05	2.35787e-05	0.154565
382	3.45032e-05	2.63172e-05	1.75448e-05	0.115011
383	3.24249e-05	2.4732e-05	1.6488e-05	0.108083
384	3.49939e-05	2.66914e-05	1.77943e-05	0.116646
385	2.42135e-05	1.84687e-05	1.23125e-05	0.0807115
386	3.00302e-05	2.29054e-05	1.52703e-05	0.100101
387	1.75232e-05	1.33657e-05	8.91049e-06	0.0584107
388	5.50099e-05	4.19586e-05	2.79724e-05	0.183366
389	4.16534e-05	3.17709e-05	2.11806e-05	0.138845
390	1.37325e-05	1.04744e-05	6.98294e-06	0.045775
391	3.05277e-05	2.32849e-05	1.55233e-05	0.101759
392	2.54643e-05	1.94227e-05	1.29485e-05	0.0848809
393	2.99726e-05	2.28614e-05	1.52409e-05	0.0999085
394	3.91938e-05	2.98948e-05	1.99299e-05	0.130646
395	2.19356e-05	1.67312e-05	1.11542e-05	0.0731185
396	1.08824e-05	8.30048e-06	5.53365e-06	0.0362746
397	4.08014e-05	3.11211e-05	2.07474e-05	0.136005
398	5.3965e-05	4.11615e-05	2.7441e-05	0.179883
399	7.61587e-05	5.80896e-05	3.87264e-05	0.253862
400	2.38089e-05	1.81601e-05	1.21067e-05	0.0793629
401	2.1995e-05	1.67766e-05	1.11844e-05	0.0733168
402	3.03803e-05	2.31724e-05	1.54483e-05	0.101268
403	4.89749e-05	3.73554e-05	2.49036e-05	0.16325
404	6.43863e-05	4.91104e-05	3.27402e-05	0.214621
405	3.31292e-05	2.52691e-05	1.68461e-05	0.110431
406	5.32068e-05	4.05832e-05	2.70555e-05	0.177356
407	6.10274e-05	4.65483e-05	3.10322e-05	0.203425
408	2.57399e-05	1.9633e-05	1.30887e-05	0.0857998
409	3.89669e-05	2.97218e-05	1.98145e-05	0.12989
410	2.43604e-05	1.85808e-05	1.23872e-05	0.0812012
411	3.0023e-05	2.28999e-05	1.52666e-05	0.100077
412	1.54564e-05	1.17893e-05	7.85951e-06	0.0515212
413	3.14945e-05	2.40223e-05	1.60148e-05	0.104982
414	4.0831e-05	3.11436e-05	2.07624e-05	0.136103
415	2.20597e-05	1.68259e-05	1.12173e-05	0.0735323
416	1.9866e-05	1.51527e-05	1.01018e-05	0.0662198
417	3.63015e-05	2.76888e-05	1.84592e-05	0.121005
418	3.97148e-05	3.02923e-05	2.01949e-05	0.132383
419	2.62141e-05	1.99947e-05	1.33298e-05	0.0873802
420	1.76004e-05	1.34246e-05	8.94974e-06	0.058668
421	9.00833e-06	6.87106e-06	4.58071e-06	0.0300278
422	2.5909e-05	1.97619e-05	1.31746e-05	0.0863632
423	5.33051e-05	4.06582e-05	2.71055e-05	0.177684
424	2.85097e-05	2.17456e-05	1.44971e-05	0.0950322
425	1.67864e-05	1.28038e-05	8.53585e-06	0.0559548
426	3.71729e-05	2.83534e-05	1.89023e-05	0.12391
427	1.68417e-05	1.2846e-05	8.56397e-06	0.0561392
428	2.2295e-05	1.70054e-05	1.13369e-05	0.0743167
429	1.73824e-05	1.32583e-05	8.83889e-06	0.0579413
430	5.56555e-05	4.2451e-05	2.83006e-05	0.185518
431	8.35102e-05	6.3697e-05	4.24647e-05	0.278367
432	3.85617e-05	2.94127e-05	1.96085e-05	0.128539
433	2.4642e-05	1.87955e-05	1.25304e-05	0.0821399
434	5.29806e-05	4.04107e-05	2.69405e-05	0.176602
435	6.89255e-05	5.25726e-05	3.50484e-05	0.229752
436	7.54522e-05	5.75508e-05	3.83672e-05	0.251507
437	7.9696e-05	6.07877e-05	4.05252e-05	0.265653
438	8.0318e-06	6.12622e-06	4.08415e-06	0.0267727
439	1.85167e-05	1.41235e-05	9.41566e-06	0.0617222
440	3.93958e-05	3.0049e-05	2.00326e-05	0.131319
441	2.83494e-05	2.16233e-05	1.44156e-05	0.0944979
442	5.4017e-05	4.12012e-05	2.74674e-05	0.180057
443	3.37353e-05	2.57315e-05	1.71543e-05	0.112451
444	2.11183e-05	1.61079e-05	1.07386e-05	0.0703943
445	2.46604e-05	1.88096e-05	1.25397e-05	0.0822013
446	3.50039e-05	2.6699e-05	1.77993e-05	0.11668
447	9.4303e-06	7.19291e-06	4.79528e-06	0.0314343
448	4.49357e-05	3.42745e-05	2.28497e-05	0.149786
449	7.62946e-05	5.81934e-05	3.87956e-05	0.254315
450	1.57938e-05	1.20466e-05	8.03108e-06	0.0526459
451	9.76285e-05	7.44657e-05	4.96438e-05	0.325428
452	5.16717e-05	3.94123e-05	2.62749e-05	0.172239
453	3.46414e-05	2.64225e-05	1.7615e-05	0.115471
454	2.47008e-05	1.88404e-05	1.25603e-05	0.0823358
455	1.84848e-05	1.40992e-05	9.39945e-06	0.0616159
456	2.18626e-05	1.66756e-05	1.11171e-05	0.0728755
457	4.04048e-05	3.08186e-05	2.05457e-05	0.134683
458	1.78818e-05	1.36392e-05	9.09283e-06	0.0596059
459	6.5445e-05	4.99178e-05	3.32785e-05	0.21815
460	2.0379e-05	1.5544e-05	1.03627e-05	0.0679301
461	2.926e-05	2.23179e-05	1.48786e-05	0.0975334
462	1.53981e-05	1.17448e-05	7.8299e-06	0.0513271
463	5.21432e-05	3.9772e-05	2.65146e-05	0.173811
464	2.89305e-05	2.20666e-05	1.47111e-05	0.0964351
465	1.4935e-05	1.13916e-05	7.5944e-06	0.0497833
466	5.80774e-05	4.42983e-05	2.95322e-05	0.193591
467	3.10364e-05	2.36729e-05	1.57819e-05	0.103455
468	3.21308e-05	2.45076e-05	1.63384e-05	0.107103
469	3.55432e-05	2.71104e-05	1.80736e-05	0.118477
470	2.7416e-05	2.09114e-05	1.39409e-05	0.0913867
471	6.43831e-05	4.91079e-05	3.27386e-05	0.21461
472	2.11166e-05	1.61066e-05	1.07377e-05	0.0703886
473	1.85446e-05	1.41448e-05	9.42986e-06	0.0618153
474	5.11471e-05	3.90122e-05	2.60081e-05	0.17049
475	3.60098e-05	2.74663e-05	1.83109e-05	0.120033
476	6.66928e-05	5.08696e-05	3.39131e-05	0.222309
477	3.36951e-05	2.57007e-05	1.71338e-05	0.112317
478	4.0138e-05	3.06151e-05	2.041e-05	0.133793
479	1.30733e-05	9.97156e-06	6.64771e-06	0.0435775
480	1.42853e-05	1.0896e-05	7.26401e-06	0.0476175
481	2.29001e-05	1.74669e-05	1.16446e-05	0.0763335
482	8.47248e-05	6.46235e-05	4.30823e-05	0.282416
483	4.7788e-05	3.645e-05	2.43e-05	0.159293
484	2.48868e-05	1.89823e-05	1.26548e-05	0.0829559
485	3.01839e-05	2.30226e-05	1.53484e-05	0.100613
486	2.29958e-05	1.754e-05	1.16933e-05	0.0766527
487	6.05625e-05	4.61937e-05	3.07958e-05	0.201875
488	7.36541e-05	5.61793e-05	3.74529e-05	0.245514
489	1.19974e-05	9.15094e-06	6.10063e-06	0.0399912
490	1.8368e-05	1.40101e-05	9.34005e-06	0.0612266
491	1.81335e-05	1.38312e-05	9.22081e-06	0.0604449
492	4.9474e-05	3.7736e-05	2.51573e-05	0.164913
493	2.2604e-05	1.72411e-05	1.14941e-05	0.0753467
494	5.7375e-05	4.37625e-05	2.9175e-05	0.19125
495	2.29958e-05	1.75399e-05	1.16933e-05	0.0766525
496	3.13727e-05	2.39293e-05	1.59529e-05	0.104576
497	1.68395e-05	1.28442e-05	8.56282e-06	0.0561316
498	2.61167e-05	1.99204e-05	1.32803e-05	0.0870558
499	4.43002e-05	3.37898e-05	2.25265e-05	0.147667
500	4.93806e-05	3.76648e-05	2.51099e-05	0.164602
501	2.10207e-05	1.60335e-05	1.0689e-05	0.0700692
502	2.87882e-05	2.1958e-05	1.46387e-05	0.0959605
503	4.22864e-05	3.22537e-05	2.15025e-05	0.140955
504	2.71919e-05	2.07405e-05	1.3827e-05	0.0906396
505	5.01998e-05	3.82897e-05	2.55264e-05	0.167333
506	2.44003e-05	1.86112e-05	1.24075e-05	0.0813342
507	5.80672e-05	4.42904e-05	2.9527e-05	0.193557
508	4.15509e-05	3.16928e-05	2.11285e-05	0.138503
509	3.42884e-05	2.61533e-05	1.74355e-05	0.114295
510	4.30726e-05	3.28534e-05	2.19023e-05	0.143575
511	2.92566e-05	2.23153e-05	1.48769e-05	0.0975219
512	2.53396e-05	1.93276e-05	1.28851e-05	0.0844653
513	2.82725e-05	2.15647e-05	1.43765e-05	0.0942416
514	7.2472e-05	5.52777e-05	3.68518e-05	0.241573
515	2.59598e-05	1.98007e-05	1.32005e-05	0.0865326
516	9.80716e-05	7.48036e-05	4.98691e-05	0.326905
517	4.61864e-05	3.52284e-05	2.34856e-05	0.153955
518	1.72495e-05	1.3157e-05	8.77133e-06	0.0574984
519	2.92391e-05	2.2302e-05	1.4868e-05	0.0974637
520	6.20466e-05	4.73257e-05	3.15505e-05	0.206822
521	2.04587e-05	1.56048e-05	1.04032e-05	0.0681956
522	6.74605e-05	5.14552e-05	3.43034e-05	0.224868
523	0.000111396	8.49666e-05	5.66444e-05	0.371319
524	3.77839e-05	2.88195e-05	1.9213e-05	0.125946
525	2.61032e-05	1.99101e-05	1.32734e-05	0.0870106
526	2.17857e-05	1.66169e-05	1.10779e-05	0.0726189
527	3.31188e-05	2.52612e-05	1.68408e-05	0.110396
528	4.07499e-05	3.10818e-05	2.07212e-05	0.135833
529	5.72831e-05	4.36924e-05	2.91283e-05	0.190944
530	7.79129e-06	5.94277e-06	3.96185e-06	0.025971
531	4.43818e-05	3.3852e-05	2.2568e-05	0.147939
532	1.74311e-05	1.32955e-05	8.86367e-06	0.0581037
533	1.34152e-05	1.02324e-05	6.82158e-06	0.0447173
534	3.14837e-05	2.40141e-05	1.60094e-05	0.104946
535	6.41727e-05	4.89474e-05	3.26316e-05	0.213909
536	3.07114e-05	2.3425e-05	1.56167e-05	0.102371
537	2.8773e-05	2.19465e-05	1.4631e-05	0.09591
538	4.94846e-05	3.77442e-05	2.51628e-05	0.164949
539	1.61492e-05	1.23177e-05	8.21183e-06	0.0538308
540	3.6141e-05	2.75664e-05	1.83776e-05	0.12047
541	3.28734e-05	2.5074e-05	1.6716e-05	0.109578
542	3.63856e-05	2.77529e-05	1.85019e-05	0.121285
543	2.75455e-05	2.10102e-05	1.40068e-05	0.0918184
544	4.38311e-05	3.3432e-05	2.2288e-05	0.146104
545	4.2602e-05	3.24945e-05	2.1663e-05	0.142007
546	2.14177e-05	1.63363e-05	1.08908e-05	0.0713925
547	1.54412e-05	1.17777e-05	7.85179e-06	0.0514706
548	5.35954e-05	4.08796e-05	2.72531e-05	0.178651
549	2.7822e-05	2.12211e-05	1.41474e-05	0.0927401
550	1.68612e-05	1.28608e-05	8.57388e-06	0.0562041
551	4.33938e-05	3.30984e-05	2.20656e-05	0.144646
552	2.3903e-05	1.82319e-05	1.21546e-05	0.0796767
553	3.34342e-05	2.55018e-05	1.70012e-05	0.111447
554	3.29432e-05	2.51272e-05	1.67515e-05	0.109811
555	3.57422e-05	2.72622e-05	1.81748e-05	0.119141
556	5.97467e-05	4.55715e-05	3.0381e-05	0.199156
557	1.92919e-05	1.47148e-05	9.80986e-06	0.0643063
558	1.96184e-05	1.49639e-05	9.97591e-06	0.0653948
559	2.76431e-05	2.10847e-05	1.40564e-05	0.0921437
560	1.7133e-05	1.30681e-05	8.71209e-06	0.0571101
561	3.80781e-05	2.90439e-05	1.93626e-05	0.126927
562	2.83987e-05	2.16609e-05	1.44406e-05	0.0946622
563	1.6406e-05	1.25136e-05	8.3424e-06	0.0546867
564	3.28373e-05	2.50465e-05	1.66977e-05	0.109458
565	3.33668e-05	2.54504e-05	1.69669e-05	0.111223
566	4.16279e-05	3.17515e-05	2.11676e-05	0.13876
567	9.62421e-06	7.34082e-06	4.89388e-06	0.0320807
568	6.44772e-05	4.91797e-05	3.27865e-05	0.214924
569	3.83779e-05	2.92726e-05	1.95151e-05	0.127926
570	1.16802e-05	8.909e-06	5.93934e-06	0.038934
571	3.68792e-05	2.81294e-05	1.8753e-05	0.122931
572	4.76975e-05	3.6381e-05	2.4254e-05	0.158992
573	1.86927e-05	1.42578e-05	9.5052e-06	0.0623091
574	6.38279e-05	4.86844e-05	3.24563e-05	0.21276
575	4.64262e-05	3.54114e-05	2.36076e-05	0.154754
576	2.13331e-05	1.62717e-05	1.08478e-05	0.0711105
577	5.30148e-05	4.04368e-05	2.69578e-05	0.176716
578	1.94855e-05	1.48625e-05	9.90832e-06	0.0649517
579	2.40472e-05	1.83419e-05	1.22279e-05	0.0801573
580	2.75914e-05	2.10452e-05	1.40302e-05	0.0919715
581	6.03958e-05	4.60666e-05	3.0711e-05	0.201319
582	4.40379e-05	3.35897e-05	2.23931e-05	0.146793
583	1.14779e-05	8.7547e-06	5.83647e-06	0.0382596
584	3.23497e-05	2.46746e-05	1.64497e-05	0.107832
585	3.4707e-05	2.64726e-05	1.76484e-05	0.11569
586	4.19278e-05	3.19803e-05	2.13202e-05	0.139759
587	2.50116e-05	1.90775e-05	1.27183e-05	0.0833721
588	2.98764e-05	2.27881e-05	1.51921e-05	0.0995881
589	2.02689e-05	1.546e-05	1.03067e-05	0.067563
590	2.5696e-05	1.95995e-05	1.30663e-05	0.0856533
591	8.27887e-05	6.31467e-05	4.20978e-05	0.275962
592	4.20429e-05	3.2068e-05	2.13787e-05	0.140143
593	4.45763e-05	3.40004e-05	2.26669e-05	0.148588
594	5.21293e-05	3.97614e-05	2.65076e-05	0.173764
595	2.36964e-05	1.80743e-05	1.20495e-05	0.0789879
596	1.88589e-05	1.43845e-05	9.58969e-06	0.062863
597	1.67177e-05	1.27514e-05	8.5009e-06	0.0557257
598	1.116e-05	8.51222e-06	5.67481e-06	0.0371999
599	2.20365e-05	1.68082e-05	1.12055e-05	0.0734549
600	3.2206e-05	2.45649e-05	1.63766e-05	0.107353
601	2.25036e-05	1.71645e-05	1.1443e-05	0.0750121
602	8.15669e-05	6.22148e-05	4.14765e-05	0.27189
603	2.34161e-05	1.78605e-05	1.1907e-05	0.0780537
604	3.72074e-05	2.83798e-05	1.89198e-05	0.124025
605	3.72717e-05	2.84288e-05	1.89525e-05	0.124239
606	2.08751e-05	1.59223e-05	1.06149e-05	0.0695835
607	3.60688e-05	2.75113e-05	1.83409e-05	0.120229
608	3.83148e-05	2.92244e-05	1.94829e-05	0.127716
609	3.48926e-05	2.66142e-05	1.77428e-05	0.116309
610	4.12863e-05	3.14909e-05	2.09939e-05	0.137621
611	4.06567e-05	3.10107e-05	2.06738e-05	0.135522
612	5.35371e-05	4.08352e-05	2.72234e-05	0.178457
613	5.86065e-05	4.47019e-05	2.98012e-05	0.195355
614	3.57767e-05	2.72885e-05	1.81923e-05	0.119256
615	2.84961e-05	2.17352e-05	1.44902e-05	0.0949869
616	2.14566e-05	1.6366e-05	1.09106e-05	0.0715222
617	3.14892e-05	2.40182e-05	1.60121e-05	0.104964
618	1.83914e-05	1.4028e-05	9.35197e-06	0.0613047
619	2.13296e-05	1.62691e-05	1.08461e-05	0.0710988
620	8.5178e-05	6.49691e-05	4.33127e-05	0.283927
621	5.49183e-05	4.18886e-05	2.79258e-05	0.183061
622	0.000120002	9.15307e-05	6.10204e-05	0.400006
623	7.61852e-05	5.81099e-05	3.87399e-05	0.253951
624	3.0999e-05	2.36444e-05	1.57629e-05	0.10333
625	4.01535e-05	3.06269e-05	2.04179e-05	0.133845
626	2.88718e-05	2.20218e-05	1.46812e-05	0.0962394
627	3.66046e-05	2.792e-05	1.86133e-05	0.122015
628	2.51663e-05	1.91955e-05	1.2797e-05	0.0838878
629	2.94103e-05	2.24326e-05	1.4955e-05	0.0980343
630	2.58693e-05	1.97317e-05	1.31545e-05	0.086231
631	4.02054e-05	3.06665e-05	2.04443e-05	0.134018
632	7.20039e-05	5.49206e-05	3.66137e-05	0.240013
633	1.44974e-05	1.10578e-05	7.37187e-06	0.0483246
634	4.08031e-05	3.11223e-05	2.07482e-05	0.13601
635	3.1437e-05	2.39784e-05	1.59856e-05	0.10479
636	3.77436e-05	2.87887e-05	1.91925e-05	0.125812
637	8.20614e-05	6.25919e-05	4.17279e-05	0.273538
638	1.70264e-05	1.29868e-05	8.65789e-06	0.0567548
639	5.80965e-05	4.43128e-05	2.95419e-05	0.193655
640	2.33344e-05	1.77982e-05	1.18655e-05	0.0777813
641	2.34893e-05	1.79164e-05	1.19442e-05	0.0782977
642	4.94238e-05	3.76978e-05	2.51319e-05	0.164746
643	2.52385e-05	1.92505e-05	1.28337e-05	0.0841283
644	3.18207e-05	2.42711e-05	1.61807e-05	0.106069
645	3.72504e-05	2.84126e-05	1.89417e-05	0.124168
646	5.82157e-05	4.44038e-05	2.96025e-05	0.194052
647	2.99689e-05	2.28586e-05	1.52391e-05	0.0998963
648	7.10819e-05	5.42174e-05	3.61449e-05	0.23694
649	3.01894e-05	2.30268e-05	1.53512e-05	0.100631
650	2.30613e-05	1.75899e-05	1.17266e-05	0.076871
651	4.66451e-05	3.55783e-05	2.37189e-05	0.155484
652	5.13169e-05	3.91417e-05	2.60945e-05	0.171056
653	2.69752e-05	2.05752e-05	1.37168e-05	0.0899174
654	3.93733e-05	3.00318e-05	2.00212e-05	0.131244
655	4.81609e-05	3.67345e-05	2.44897e-05	0.160536
656	2.7868e-05	2.12562e-05	1.41708e-05	0.0928933
657	2.95644e-05	2.25501e-05	1.50334e-05	0.0985481
658	0.000109352	8.34081e-05	5.56054e-05	0.364508
659	2.17556e-05	1.6594e-05	1.10627e-05	0.0725187
660	2.73609e-05	2.08694e-05	1.39129e-05	0.0912029
661	3.74669e-05	2.85777e-05	1.90518e-05	0.12489
662	3.99429e-05	3.04663e-05	2.03108e-05	0.133143
663	3.53085e-05	2.69314e-05	1.79543e-05	0.117695
664	0.000105745	8.06568e-05	5.37712e-05	0.352485
665	1.14272e-05	8.71606e-06	5.81071e-06	0.0380908
666	1.9462e-05	1.48445e-05	9.89634e-06	0.0648732
667	4.18076e-05	3.18886e-05	2.1259e-05	0.139359
668	1.94903e-05	1.48661e-05	9.91075e-06	0.0649676
669	4.25398e-05	3.2447e-05	2.16313e-05	0.141799
670	4.09022e-05	3.1198e-05	2.07987e-05	0.136341
671	5.80094e-05	4.42464e-05	2.94976e-05	0.193365
672	4.7959e-05	3.65805e-05	2.4387e-05	0.159863
673	2.74926e-05	2.09698e-05	1.39799e-05	0.0916419
674	4.53402e-05	3.4583e-05	2.30554e-05	0.151134
675	3.57896e-05	2.72983e-05	1.81989e-05	0.119299
676	3.74752e-05	2.8584e-05	1.9056e-05	0.124917
677	3.68489e-05	2.81063e-05	1.87375e-05	0.12283
678	3.71887e-05	2.83655e-05	1.89103e-05	0.123962
679	2.69974e-05	2.05921e-05	1.37281e-05	0.0899913
680	3.25491e-05	2.48267e-05	1.65511e-05	0.108497
681	2.32316e-05	1.77198e-05	1.18132e-05	0.0774386
682	2.74309e-05	2.09228e-05	1.39485e-05	0.0914365
683	2.91461e-05	2.2231e-05	1.48207e-05	0.0971536
684	2.4819e-05	1.89306e-05	1.26204e-05	0.08273
685	2.42913e-05	1.8528e-05	1.2352e-05	0.0809708
686	2.1818e-05	1.66416e-05	1.10944e-05	0.0727267
687	2.85901e-05	2.18069e-05	1.4538e-05	0.0953002
688	3.82322e-05	2.91614e-05	1.9441e-05	0.127441
689	2.47272e-05	1.88605e-05	1.25737e-05	0.0824239
690	1.79858e-05	1.37186e-05	9.1457e-06	0.0599525
691	2.82686e-05	2.15618e-05	1.43745e-05	0.0942287
692	2.50159e-05	1.90807e-05	1.27205e-05	0.0833863
693	1.08129e-05	8.2475e-06	5.49834e-06	0.0360431
694	2.41348e-05	1.84087e-05	1.22725e-05	0.0804494
695	3.84088e-05	2.92961e-05	1.95307e-05	0.128029
696	2.91492e-05	2.22334e-05	1.48223e-05	0.097164
697	1.32294e-05	1.00906e-05	6.72709e-06	0.0440979
698	3.99999e-05	3.05097e-05	2.03398e-05	0.133333
699	5.36468e-05	4.09188e-05	2.72792e-05	0.178823
700	9.29105e-05	7.08671e-05	4.72447e-05	0.309702
701	2.56143e-05	1.95372e-05	1.30248e-05	0.0853811
702	5.51184e-05	4.20413e-05	2.80275e-05	0.183728
703	8.22428e-05	6.27303e-05	4.18202e-05	0.274143
704	6.40167e-05	4.88284e-05	3.25523e-05	0.213389
705	2.99733e-05	2.2862e-05	1.52413e-05	0.099911
706	1.16084e-05	8.85422e-06	5.90282e-06	0.0386945
707	3.73e-05	2.84504e-05	1.89669e-05	0.124333
708	3.54245e-05	2.70199e-05	1.80133e-05	0.118082
709	4.75055e-05	3.62346e-05	2.41564e-05	0.158352
710	2.11244e-05	1.61125e-05	1.07417e-05	0.0704146
711	5.66054e-05	4.31755e-05	2.87837e-05	0.188685
712	3.62076e-05	2.76171e-05	1.84114e-05	0.120692
713	4.4109e-05	3.3644e-05	2.24293e-05	0.14703
714	3.58713e-05	2.73606e-05	1.82404e-05	0.119571
715	1.84897e-05	1.41029e-05	9.40196e-06	0.0616324
716	3.44252e-05	2.62576e-05	1.75051e-05	0.114751
717	7.42044e-05	5.6599e-05	3.77327e-05	0.247348
718	2.38552e-05	1.81954e-05	1.21303e-05	0.0795172
719	1.87406e-05	1.42943e-05	9.52955e-06	0.0624688
720	4.37672e-05	3.33832e-05	2.22555e-05	0.145891
721	2.96343e-05	2.26034e-05	1.5069e-05	0.0987811
722	4.21636e-05	3.216e-05	2.144e-05	0.140545
723	4.7762e-05	3.64302e-05	2.42868e-05	0.159207
724	2.63615e-05	2.01071e-05	1.34047e-05	0.0878716
725	2.39423e-05	1.82619e-05	1.21746e-05	0.0798077
726	1.32647e-05	1.01175e-05	6.74503e-06	0.0442155
727	1.80219e-05	1.37461e-05	9.16408e-06	0.060073
728	3.74818e-05	2.85891e-05	1.90594e-05	0.124939
729	4.57286e-05	3.48792e-05	2.32528e-05	0.152429
730	1.44042e-05	1.09868e-05	7.32451e-06	0.0480141
731	5.00786e-05	3.81972e-05	2.54648e-05	0.166929
732	1.22767e-05	9.36396e-06	6.24264e-06	0.0409222
733	3.41445e-05	2.60436e-05	1.73624e-05	0.113815
734	3.7877e-05	2.88905e-05	1.92603e-05	0.126257
735	1.41428e-05	1.07873e-05	7.19157e-06	0.0471427
736	3.93121e-05	2.99851e-05	1.99901e-05	0.13104
737	5.28813e-05	4.0335e-05	2.689e-05	0.176271
738	3.71888e-05	2.83656e-05	1.89104e-05	0.123963
739	1.99846e-05	1.52432e-05	1.01621e-05	0.0666154
740	6.40383e-05	4.88449e-05	3.25633e-05	0.213461
741	2.73208e-05	2.08388e-05	1.38925e-05	0.0910693
742	2.53575e-05	1.93413e-05	1.28942e-05	0.0845249
743	4.76952e-05	3.63793e-05	2.42529e-05	0.158984
744	5.51897e-05	4.20957e-05	2.80638e-05	0.183966
745	1.6309e-05	1.24396e-05	8.29307e-06	0.0543633
746	2.8517e-05	2.17512e-05	1.45008e-05	0.0950567
747	2.60117e-05	1.98403e-05	1.32269e-05	0.0867057
748	2.191e-05	1.67118e-05	1.11412e-05	0.0730335
749	2.50206e-05	1.90843e-05	1.27229e-05	0.083402
750	5.06908e-05	3.86642e-05	2.57761e-05	0.168969
751	1.84063e-05	1.40393e-05	9.35956e-06	0.0613545
752	3.67294e-05	2.80152e-05	1.86768e-05	0.122431
753	7.35374e-05	5.60903e-05	3.73935e-05	0.245125
754	3.7739e-05	2.87853e-05	1.91902e-05	0.125797
755	3.22817e-05	2.46227e-05	1.64151e-05	0.107606
756	1.33286e-05	1.01663e-05	6.77755e-06	0.0444286
757	2.09033e-05	1.59439e-05	1.06293e-05	0.0696777
758	4.67643e-05	3.56692e-05	2.37795e-05	0.155881
759	1.29743e-05	9.89611e-06	6.59741e-06	0.0432478
760	3.33133e-05	2.54096e-05	1.69397e-05	0.111044
761	3.3065e-05	2.52201e-05	1.68134e-05	0.110217
762	2.61522e-05	1.99475e-05	1.32983e-05	0.087174
763	2.73862e-05	2.08887e-05	1.39258e-05	0.0912874
764	2.71684e-05	2.07225e-05	1.3815e-05	0.0905612
765	1.7288e-05	1.31864e-05	8.79092e-06	0.0576268
766	5.21639e-05	3.97877e-05	2.65252e-05	0.17388
767	1.2871e-05	9.81729e-06	6.54486e-06	0.0429033
768	2.85631e-05	2.17863e-05	1.45242e-05	0.0952102
769	3.6784e-05	2.80568e-05	1.87046e-05	0.122613
770	4.37005e-05	3.33323e-05	2.22216e-05	0.145668
771	3.00285e-05	2.29041e-05	1.52694e-05	0.100095
772	2.32232e-05	1.77134e-05	1.18089e-05	0.0774106
773	1.97882e-05	1.50933e-05	1.00622e-05	0.0659606
774	8.19861e-05	6.25345e-05	4.16897e-05	0.273287
775	1.93348e-05	1.47475e-05	9.83167e-06	0.0644492
776	3.43309e-05	2.61857e-05	1.74571e-05	0.114436
777	2.70735e-05	2.06501e-05	1.37668e-05	0.0902448
778	3.262e-05	2.48808e-05	1.65872e-05	0.108733
779	4.46423e-05	3.40507e-05	2.27005e-05	0.148808
780	4.91385e-05	3.74802e-05	2.49868e-05	0.163795
781	4.37724e-05	3.33872e-05	2.22581e-05	0.145908
782	4.37911e-05	3.34014e-05	2.22676e-05	0.14597
783	1.19711e-05	9.13092e-06	6.08728e-06	0.0399038
784	1.53408e-05	1.17011e-05	7.80075e-06	0.051136
785	2.63812e-05	2.01221e-05	1.34147e-05	0.0879373
786	2.82583e-05	2.15539e-05	1.43693e-05	0.0941944
787	2.9655e-05	2.26192e-05	1.50795e-05	0.0988499
788	4.81856e-05	3.67533e-05	2.45022e-05	0.160619
789	2.44231e-05	1.86286e-05	1.24191e-05	0.0814103
790	3.6266e-05	2.76617e-05	1.84411e-05	0.120887
791	3.92562e-05	2.99425e-05	1.99616e-05	0.130854
792	5.28646e-05	4.03222e-05	2.68815e-05	0.176215
793	2.83638e-05	2.16344e-05	1.44229e-05	0.0945461
794	3.97295e-05	3.03035e-05	2.02023e-05	0.132432
795	3.55231e-05	2.7095e-05	1.80634e-05	0.11841
796	1.96718e-05	1.50045e-05	1.0003e-05	0.0655725
797	6.98607e-05	5.32859e-05	3.5524e-05	0.232869
798	2.76947e-05	2.1124e-05	1.40827e-05	0.0923158
799	3.77901e-05	2.88242e-05	1.92161e-05	0.125967
800	1.47729e-05	1.1268e-05	7.51198e-06	0.0492431
801	3.14383e-05	2.39794e-05	1.59863e-05	0.104794
802	5.86987e-05	4.47722e-05	2.98481e-05	0.195662
803	1.96998e-05	1.50259e-05	1.00173e-05	0.065666
804	3.40552e-05	2.59754e-05	1.73169e-05	0.113517
805	1.90433e-05	1.45252e-05	9.68346e-06	0.0634777
806	2.94252e-05	2.24439e-05	1.49626e-05	0.098084
807	3.08962e-05	2.35659e-05	1.57106e-05	0.102987
808	3.07805e-05	2.34776e-05	1.56518e-05	0.102602
809	3.26669e-05	2.49165e-05	1.6611e-05	0.10889
810	2.20483e-05	1.68173e-05	1.12115e-05	0.0734944
811	5.73091e-05	4.37123e-05	2.91415e-05	0.19103
812	2.21177e-05	1.68702e-05	1.12468e-05	0.0737257
813	5.64975e-05	4.30932e-05	2.87288e-05	0.188325
814	1.94783e-05	1.4857e-05	9.90467e-06	0.0649278
815	1.59495e-05	1.21654e-05	8.11028e-06	0.0531651
816	2.4733e-05	1.8865e-05	1.25767e-05	0.0824433
817	1.9468e-05	1.48491e-05	9.89943e-06	0.0648934
818	2.44325e-05	1.86358e-05	1.24238e-05	0.0814417
819	9.47817e-05	7.22943e-05	4.81962e-05	0.315939
820	3.59286e-05	2.74044e-05	1.82696e-05	0.119762
821	5.88985e-05	4.49246e-05	2.99497e-05	0.196328
822	1.83257e-05	1.39778e-05	9.31856e-06	0.0610857
823	4.86768e-05	3.7128e-05	2.4752e-05	0.162256
824	2.4055e-05	1.83478e-05	1.22319e-05	0.0801833
825	3.22438e-05	2.45938e-05	1.63959e-05	0.107479
826	2.92313e-05	2.22961e-05	1.4864e-05	0.0974378
827	3.47556e-05	2.65097e-05	1.76731e-05	0.115852
828	1.50273e-05	1.1462e-05	7.64136e-06	0.0500912
829	2.93624e-05	2.2396e-05	1.49307e-05	0.0978746
830	9.34521e-06	7.12801e-06	4.75201e-06	0.0311507
831	1.9767e-05	1.50771e-05	1.00514e-05	0.0658898
832	5.25105e-05	4.00521e-05	2.67014e-05	0.175035
833	2.19349e-05	1.67307e-05	1.11538e-05	0.0731162
834	2.01063e-05	1.5336e-05	1.0224e-05	0.0670209
835	1.27009e-05	9.68759e-06	6.45839e-06	0.0423365
836	3.10419e-05	2.3677e-05	1.57847e-05	0.103473
837	2.58587e-05	1.97236e-05	1.31491e-05	0.0861957
838	2.80217e-05	2.13734e-05	1.4249e-05	0.0934058
839	5.76069e-05	4.39394e-05	2.92929e-05	0.192023
840	2.62345e-05	2.00102e-05	1.33402e-05	0.0874484
841	3.38723e-05	2.58359e-05	1.72239e-05	0.112908
842	5.03455e-05	3.84008e-05	2.56005e-05	0.167818
843	5.11959e-05	3.90494e-05	2.6033e-05	0.170653
844	3.39778e-05	2.59164e-05	1.72776e-05	0.113259
845	3.02299e-05	2.30577e-05	1.53718e-05	0.100766
846	5.23563e-05	3.99345e-05	2.6623e-05	0.174521
847	3.20303e-05	2.4431e-05	1.62873e-05	0.106768
848	3.00093e-05	2.28895e-05	1.52596e-05	0.100031
849	5.91807e-05	4.51398e-05	3.00932e-05	0.197269
850	2.77517e-05	2.11675e-05	1.41116e-05	0.0925057
851	3.31261e-05	2.52667e-05	1.68445e-05	0.11042
852	8.14867e-05	6.21536e-05	4.14357e-05	0.271622
853	3.54613e-05	2.70479e-05	1.80319e-05	0.118204
854	8.16599e-05	6.22857e-05	4.15238e-05	0.2722
855	1.89521e-05	1.44556e-05	9.63706e-06	0.0631736
856	1.74537e-05	1.33127e-05	8.87513e-06	0.0581788
857	4.5828e-05	3.49551e-05	2.33034e-05	0.15276
858	6.62404e-05	5.05246e-05	3.3683e-05	0.220801
859	3.87752e-05	2.95756e-05	1.9717e-05	0.129251
860	1.25275e-05	9.55525e-06	6.37017e-06	0.0417582
861	1.6053e-05	1.22444e-05	8.16291e-06	0.0535101
862	2.99764e-05	2.28644e-05	1.52429e-05	0.0999214
863	3.39453e-05	2.58916e-05	1.72611e-05	0.113151
864	1.86745e-05	1.42439e-05	9.49593e-06	0.0622484
865	3.29667e-05	2.51452e-05	1.67635e-05	0.109889
866	1.71775e-05	1.31021e-05	8.7347e-06	0.0572583
867	1.66174e-05	1.26749e-05	8.4499e-06	0.0553914
868	5.55012e-05	4.23333e-05	2.82222e-05	0.185004
869	2.65702e-05	2.02663e-05	1.35108e-05	0.0885672
870	4.81854e-05	3.67532e-05	2.45021e-05	0.160618
871	2.82455e-05	2.15441e-05	1.43627e-05	0.0941516
872	5.377e-05	4.10128e-05	2.73419e-05	0.179233
873	2.43e-05	1.85347e-05	1.23565e-05	0.0809999
874	2.24064e-05	1.70904e-05	1.13936e-05	0.0746881
875	4.61272e-05	3.51833e-05	2.34555e-05	0.153757
876	4.34165e-05	3.31157e-05	2.20771e-05	0.144722
877	5.72819e-05	4.36915e-05	2.91277e-05	0.19094
878	1.59107e-05	1.21358e-05	8.09052e-06	0.0530355
879	4.02153e-05	3.0674e-05	2.04494e-05	0.134051
880	3.75446e-05	2.8637e-05	1.90913e-05	0.125149
881	3.25625e-05	2.48369e-05	1.65579e-05	0.108542
882	1.77679e-05	1.35524e-05	9.03494e-06	0.0592265
883	1.78399e-05	1.36073e-05	9.07154e-06	0.0594664
884	1.70389e-05	1.29963e-05	8.66421e-06	0.0567962
885	2.10458e-05	1.60526e-05	1.07017e-05	0.0701526
886	4.75771e-05	3.62892e-05	2.41928e-05	0.15859
887	2.71051e-05	2.06743e-05	1.37829e-05	0.0903505
888	3.78457e-05	2.88666e-05	1.92444e-05	0.126152
889	2.41132e-05	1.83922e-05	1.22615e-05	0.0803773
890	3.31558e-05	2.52894e-05	1.68596e-05	0.110519
891	1.86466e-05	1.42226e-05	9.48175e-06	0.0621554
892	2.41065e-05	1.83871e-05	1.22581e-05	0.080355
893	1.61824e-05	1.23431e-05	8.22872e-06	0.0539415
894	1.99131e-05	1.51886e-05	1.01257e-05	0.0663769
895	7.21094e-05	5.50011e-05	3.66674e-05	0.240365
896	2.08245e-05	1.58838e-05	1.05892e-05	0.069415
897	3.8155e-05	2.91025e-05	1.94017e-05	0.127183
898	8.8157e-06	6.72413e-06	4.48275e-06	0.0293857
899	4.26545e-05	3.25345e-05	2.16897e-05	0.142182
900	5.48689e-05	4.1851e-05	2.79007e-05	0.182896
901	3.81887e-05	2.91282e-05	1.94188e-05	0.127296
902	3.86789e-05	2.95021e-05	1.96681e-05	0.12893
903	4.25094e-05	3.24238e-05	2.16159e-05	0.141698
904	2.68502e-05	2.04799e-05	1.36532e-05	0.0895007
905	2.54658e-05	1.94239e-05	1.29493e-05	0.0848861
906	4.55949e-05	3.47773e-05	2.31849e-05	0.151983
907	1.5925e-05	1.21467e-05	8.09781e-06	0.0530833
908	2.89679e-05	2.20951e-05	1.47301e-05	0.0965596
909	1.74709e-05	1.33259e-05	8.88391e-06	0.0582364
910	1.78697e-05	1.363e-05	9.08666e-06	0.0595655
911	1.12118e-05	8.55171e-06	5.70114e-06	0.0373725
912	2.68348e-05	2.04681e-05	1.36454e-05	0.0894493
913	4.97007e-05	3.7909e-05	2.52727e-05	0.165669
914	2.06437e-05	1.57459e-05	1.04973e-05	0.0688124
915	8.39529e-05	6.40347e-05	4.26898e-05	0.279843
916	4.29545e-05	3.27633e-05	2.18422e-05	0.143182
917	1.79825e-05	1.3716e-05	9.14403e-06	0.0599416
918	2.22667e-05	1.69838e-05	1.13225e-05	0.0742222
919	1.4349e-05	1.09446e-05	7.29642e-06	0.04783
920	3.67775e-05	2.80518e-05	1.87012e-05	0.122592
921	6.03601e-05	4.60394e-05	3.06929e-05	0.2012
922	3.51625e-05	2.682e-05	1.788e-05	0.117208
923	2.75627e-05	2.10233e-05	1.40155e-05	0.0918755
924	5.30746e-05	4.04824e-05	2.69883e-05	0.176915
925	2.33669e-05	1.7823e-05	1.1882e-05	0.0778898
926	4.6949e-05	3.58101e-05	2.38734e-05	0.156497
927	2.61094e-05	1.99148e-05	1.32766e-05	0.0870315
928	4.65692e-05	3.55205e-05	2.36803e-05	0.155231
929	1.9416e-05	1.48094e-05	9.87295e-06	0.0647199
930	1.64781e-05	1.25686e-05	8.37906e-06	0.054927
931	7.90923e-05	6.03272e-05	4.02182e-05	0.263641
932	7.50163e-05	5.72183e-05	3.81456e-05	0.250054
933	2.27133e-05	1.73245e-05	1.15496e-05	0.0757111
934	2.06827e-05	1.57756e-05	1.05171e-05	0.0689422
935	4.98124e-05	3.79941e-05	2.53294e-05	0.166041
936	3.33476e-05	2.54357e-05	1.69571e-05	0.111159
937	2.69547e-05	2.05596e-05	1.37064e-05	0.089849
938	2.82109e-05	2.15178e-05	1.43452e-05	0.0940365
939	2.68153e-05	2.04533e-05	1.36355e-05	0.0893844
940	1.84411e-05	1.40658e-05	9.37722e-06	0.0614702
941	2.15911e-05	1.64685e-05	1.0979e-05	0.0719705
942	4.27529e-05	3.26095e-05	2.17397e-05	0.14251
943	5.6014e-05	4.27244e-05	2.84829e-05	0.186713
944	2.57216e-05	1.9619e-05	1.30794e-05	0.0857387
945	1.86214e-05	1.42034e-05	9.46892e-06	0.0620713
946	1.52627e-05	1.16415e-05	7.76102e-06	0.0508756
947	7.49834e-05	5.71932e-05	3.81288e-05	0.249945
948	3.03182e-05	2.3125e-05	1.54167e-05	0.101061
949	5.54249e-05	4.22751e-05	2.81834e-05	0.18475
950	2.99859e-05	2.28716e-05	1.52477e-05	0.0999529
951	4.80991e-05	3.66874e-05	2.44582e-05	0.16033
952	2.48171e-05	1.89291e-05	1.26194e-05	0.0827236
953	3.98378e-05	3.03861e-05	2.02574e-05	0.132793
954	1.19007e-05	9.07718e-06	6.05145e-06	0.0396689
955	7.37758e-05	5.62721e-05	3.75147e-05	0.245919
956	2.59009e-05	1.97558e-05	1.31705e-05	0.0863364
957	4.97001e-05	3.79085e-05	2.52724e-05	0.165667
958	2.21407e-05	1.68877e-05	1.12585e-05	0.0738022
959	3.32228e-05	2.53406e-05	1.68937e-05	0.110743
960	4.84237e-05	3.6935e-05	2.46233e-05	0.161412
961	1.91649e-05	1.46179e-05	9.74527e-06	0.0638829
962	2.23437e-05	1.70425e-05	1.13617e-05	0.0744789
963	2.25357e-05	1.7189e-05	1.14593e-05	0.0751191
964	2.8837e-05	2.19953e-05	1.46635e-05	0.0961235
965	4.26094e-05	3.25001e-05	2.16668e-05	0.142031
966	2.88588e-05	2.20119e-05	1.46746e-05	0.0961959
967	4.28271e-05	3.26661e-05	2.17774e-05	0.142757
968	4.79681e-05	3.65875e-05	2.43916e-05	0.159894
969	3.4317e-05	2.61751e-05	1.74501e-05	0.11439
970	2.97343e-05	2.26797e-05	1.51198e-05	0.0991144
971	2.83257e-05	2.16053e-05	1.44035e-05	0.094419
972	3.38549e-05	2.58226e-05	1.72151e-05	0.11285
973	4.03086e-05	3.07452e-05	2.04968e-05	0.134362
974	5.50831e-05	4.20143e-05	2.80096e-05	0.18361
975	3.36359e-05	2.56556e-05	1.71037e-05	0.11212
976	1.5336e-05	1.16975e-05	7.79831e-06	0.05112
977	2.51668e-05	1.91959e-05	1.27972e-05	0.0838894
978	3.41115e-05	2.60184e-05	1.73456e-05	0.113705
979	2.31371e-05	1.76477e-05	1.17652e-05	0.0771238
980	3.23619e-05	2.46839e-05	1.64559e-05	0.107873
981	2.78042e-05	2.12076e-05	1.41384e-05	0.0926808
982	3.98205e-05	3.03729e-05	2.02486e-05	0.132735
983	2.70928e-05	2.06649e-05	1.37766e-05	0.0903094
984	3.52636e-05	2.68972e-05	1.79314e-05	0.117545
985	3.91891e-05	2.98913e-05	1.99275e-05	0.13063
986	2.69801e-05	2.05789e-05	1.37193e-05	0.0899336
987	3.56953e-05	2.72264e-05	1.81509e-05	0.118984
988	2.78648e-05	2.12537e-05	1.41692e-05	0.0928827
989	2.59012e-05	1.9756e-05	1.31707e-05	0.0863373
990	0.00012092	9.22309e-05	6.14873e-05	0.403066
991	3.26707e-05	2.49194e-05	1.66129e-05	0.108902
992	4.64224e-05	3.54084e-05	2.36056e-05	0.154741
993	2.03125e-05	1.54932e-05	1.03288e-05	0.0677082
994	1.86476e-05	1.42233e-05	9.48222e-06	0.0621585
995	3.44767e-05	2.62969e-05	1.75313e-05	0.114922
996	6.9227e-05	5.28026e-05	3.52017e-05	0.230757
997	1.68683e-05	1.28662e-05	8.57745e-06	0.0562275
998	2.63762e-05	2.01183e-05	1.34122e-05	0.0879208
999	4.54799e-05	3.46895e-05	2.31264e-05	0.1516
1000	3.18093e-05	2.42624e-05	1.61749e-05	0.106031
1001	3.93106e-05	2.9984e-05	1.99893e-05	0.131035
1002	4.7554e-05	3.62716e-05	2.4181e-05	0.158513
1003	4.11517e-05	3.13883e-05	2.09255e-05	0.137172
1004	3.72795e-05	2.84347e-05	1.89565e-05	0.124265
1005	1.67094e-05	1.2745e-05	8.49668e-06	0.055698
1006	7.76686e-05	5.92414e-05	3.94942e-05	0.258895
1007	6.7944e-05	5.18239e-05	3.45493e-05	0.22648
1008	6.05538e-05	4.61871e-05	3.07914e-05	0.201846
1009	1.75326e-05	1.33729e-05	8.91528e-06	0.0584421
1010	2.82038e-05	2.15123e-05	1.43415e-05	0.0940126
1011	3.57672e-05	2.72812e-05	1.81875e-05	0.119224
1012	8.5259e-05	6.50309e-05	4.33539e-05	0.284197
1013	2.80283e-05	2.13784e-05	1.42523e-05	0.0934277
1014	3.07514e-05	2.34555e-05	1.5637e-05	0.102505
1015	2.51029e-05	1.91471e-05	1.27647e-05	0.0836762
1016	7.57217e-05	5.77563e-05	3.85042e-05	0.252406
1017	3.84167e-05	2.93022e-05	1.95348e-05	0.128056
1018	0.0001747	0.000133251	8.88342e-05	0.582332
1019	5.7553e-05	4.38982e-05	2.92655e-05	0.191843
1020	1.93823e-05	1.47837e-05	9.85581e-06	0.0646075
1021	1.85424e-05	1.41431e-05	9.42875e-06	0.061808
1022	3.23848e-05	2.47014e-05	1.64676e-05	0.107949
1023	6.90475e-05	5.26656e-05	3.51104e-05	0.230158
1024	2.28233e-05	1.74083e-05	1.16056e-05	0.0760776
1025	3.14435e-05	2.39834e-05	1.59889e-05	0.104812
1026	2.30582e-05	1.75875e-05	1.1725e-05	0.0768606
1027	7.44611e-05	5.67949e-05	3.78632e-05	0.248204
1028	2.83085e-05	2.15922e-05	1.43948e-05	0.0943616
1029	3.65902e-05	2.7909e-05	1.8606e-05	0.121967
1030	3.09165e-05	2.35814e-05	1.57209e-05	0.103055
1031	5.09167e-05	3.88364e-05	2.5891e-05	0.169722
1032	4.35438e-05	3.32128e-05	2.21419e-05	0.145146
1033	2.58465e-05	1.97143e-05	1.31428e-05	0.0861548
1034	3.78038e-05	2.88346e-05	1.92231e-05	0.126013
1035	2.34443e-05	1.7882e-05	1.19213e-05	0.0781475
1036	2.25549e-05	1.72037e-05	1.14691e-05	0.0751831
1037	1.40589e-05	1.07234e-05	7.14892e-06	0.0468631
1038	2.19524e-05	1.67441e-05	1.11627e-05	0.0731746
1039	4.65175e-05	3.5481e-05	2.3654e-05	0.155058
1040	1.29329e-05	9.86451e-06	6.57634e-06	0.0431097
1041	2.85987e-05	2.18135e-05	1.45423e-05	0.095329
1042	4.61355e-05	3.51896e-05	2.34598e-05	0.153785
1043	3.23964e-05	2.47102e-05	1.64735e-05	0.107988
1044	2.44171e-05	1.8624e-05	1.2416e-05	0.0813903
1045	1.75843e-05	1.34124e-05	8.94157e-06	0.0586144
1046	4.53963e-05	3.46258e-05	2.30839e-05	0.151321
1047	2.97684e-05	2.27057e-05	1.51371e-05	0.0992279
1048	1.38919e-05	1.05959e-05	7.06396e-06	0.0463062
1049	6.34001e-05	4.83581e-05	3.22388e-05	0.211334
1050	4.54479e-05	3.46652e-05	2.31101e-05	0.151493
1051	1.73097e-05	1.32029e-05	8.80193e-06	0.057699
1052	2.16425e-05	1.65077e-05	1.10051e-05	0.0721416
1053	3.31585e-05	2.52915e-05	1.6861e-05	0.110528
1054	8.91387e-06	6.79901e-06	4.53267e-06	0.0297129
1055	6.68658e-06	5.10016e-06	3.4001e-06	0.0222886
1056	2.76975e-05	2.11261e-05	1.40841e-05	0.0923248
1057	0.000101875	7.7705e-05	5.18033e-05	0.339585
1058	1.46687e-05	1.11885e-05	7.45901e-06	0.0488958
1059	3.36149e-05	2.56396e-05	1.70931e-05	0.11205
1060	7.11573e-05	5.42749e-05	3.61833e-05	0.237191
1061	2.27358e-05	1.73416e-05	1.15611e-05	0.0757861
1062	2.79835e-05	2.13443e-05	1.42295e-05	0.0932783
1063	2.90622e-05	2.2167e-05	1.4778e-05	0.0968739
1064	1.26768e-05	9.66916e-06	6.44611e-06	0.042256
1065	4.85505e-05	3.70317e-05	2.46878e-05	0.161835
1066	4.6517e-05	3.54806e-05	2.36537e-05	0.155057
1067	2.08665e-05	1.59158e-05	1.06105e-05	0.0695549
1068	3.29476e-05	2.51306e-05	1.67537e-05	0.109825
1069	2.29744e-05	1.75236e-05	1.16824e-05	0.0765812
1070	2.12806e-05	1.62316e-05	1.08211e-05	0.0709352
1071	6.01632e-05	4.58892e-05	3.05928e-05	0.200544
1072	6.51671e-05	4.97059e-05	3.31372e-05	0.217224
1073	8.77993e-06	6.69685e-06	4.46457e-06	0.0292664
1074	0.000107488	8.19863e-05	5.46575e-05	0.358295
1075	2.61032e-05	1.99101e-05	1.32734e-05	0.0870108
1076	2.98646e-05	2.27791e-05	1.5186e-05	0.0995487
1077	4.76093e-05	3.63138e-05	2.42092e-05	0.158698
1078	6.78946e-05	5.17863e-05	3.45242e-05	0.226315
1079	2.55114e-05	1.94587e-05	1.29724e-05	0.0850379
1080	3.50694e-05	2.6749e-05	1.78327e-05	0.116898
1081	3.58776e-05	2.73655e-05	1.82436e-05	0.119592
1082	1.99008e-05	1.51792e-05	1.01195e-05	0.0663359
1083	7.74563e-05	5.90794e-05	3.93863e-05	0.258188
1084	3.52583e-05	2.68931e-05	1.79287e-05	0.117528
1085	3.37357e-05	2.57317e-05	1.71545e-05	0.112452
1086	3.84117e-05	2.92984e-05	1.95322e-05	0.128039
1087	1.49641e-05	1.14138e-05	7.60917e-06	0.0498802
1088	7.04831e-05	5.37607e-05	3.58404e-05	0.234944
1089	5.17196e-05	3.94489e-05	2.62992e-05	0.172399
1090	5.20849e-05	3.97275e-05	2.6485e-05	0.173616
1091	3.0091e-05	2.29518e-05	1.53012e-05	0.100303
1092	7.1829e-05	5.47872e-05	3.65248e-05	0.23943
1093	4.42695e-05	3.37663e-05	2.25109e-05	0.147565
1094	2.94824e-05	2.24876e-05	1.49917e-05	0.0982747
1095	4.63305e-05	3.53383e-05	2.35589e-05	0.154435
1096	2.49938e-05	1.90639e-05	1.27093e-05	0.0833126
1097	2.12298e-05	1.61929e-05	1.07953e-05	0.070766
1098	2.82956e-05	2.15824e-05	1.43882e-05	0.0943188
1099	4.39718e-05	3.35393e-05	2.23595e-05	0.146573
1100	5.03057e-05	3.83704e-05	2.55803e-05	0.167686
1101	2.67299e-05	2.03881e-05	1.35921e-05	0.0890998
1102	1.71333e-05	1.30683e-05	8.7122e-06	0.0571108
1103	9.60722e-05	7.32786e-05	4.88524e-05	0.320241
1104	1.61373e-05	1.23087e-05	8.20577e-06	0.0537911
1105	4.92552e-05	3.75692e-05	2.50461e-05	0.164184
1106	2.76283e-05	2.10734e-05	1.40489e-05	0.0920944
1107	3.73567e-05	2.84936e-05	1.89957e-05	0.124522
1108	1.55611e-05	1.18691e-05	7.91276e-06	0.0518703
1109	3.46758e-05	2.64488e-05	1.76325e-05	0.115586
1110	2.71909e-05	2.07397e-05	1.38265e-05	0.0906364
1111	3.48777e-05	2.66028e-05	1.77352e-05	0.116259
1112	6.99467e-05	5.33515e-05	3.55677e-05	0.233156
1113	2.66136e-05	2.02994e-05	1.3533e-05	0.0887122
1114	3.69023e-05	2.8147e-05	1.87647e-05	0.123008
1115	2.25561e-05	1.72046e-05	1.14697e-05	0.0751871
1116	2.75549e-05	2.10174e-05	1.40116e-05	0.0918498
1117	2.53383e-05	1.93267e-05	1.28845e-05	0.0844612
1118	3.27703e-05	2.49954e-05	1.66636e-05	0.109234
1119	2.76059e-05	2.10563e-05	1.40375e-05	0.0920198
1120	2.46389e-05	1.87932e-05	1.25288e-05	0.0821297
1121	2.16845e-05	1.65398e-05	1.10265e-05	0.0722818
1122	5.15526e-05	3.93215e-05	2.62143e-05	0.171842
1123	1.98149e-05	1.51137e-05	1.00758e-05	0.0660497
1124	4.46779e-05	3.40779e-05	2.27186e-05	0.148926
1125	3.67851e-05	2.80577e-05	1.87051e-05	0.122617
1126	3.36188e-05	2.56426e-05	1.70951e-05	0.112063
1127	1.20795e-05	9.21356e-06	6.14237e-06	0.0402649
1128	3.48083e-05	2.65499e-05	1.76999e-05	0.116028
1129	6.51743e-05	4.97114e-05	3.31409e-05	0.217248
1130	3.99737e-05	3.04897e-05	2.03265e-05	0.133246
1131	2.79695e-05	2.13336e-05	1.42224e-05	0.0932317
1132	3.80952e-05	2.90569e-05	1.93713e-05	0.126984
1133	3.36327e-05	2.56532e-05	1.71021e-05	0.112109
1134	7.1524e-05	5.45545e-05	3.63697e-05	0.238413
1135	4.87463e-05	3.7181e-05	2.47873e-05	0.162488
1136	1.78069e-05	1.35821e-05	9.05473e-06	0.0593562
1137	2.60587e-05	1.98762e-05	1.32508e-05	0.0868624
1138	3.45496e-05	2.63526e-05	1.75684e-05	0.115165
1139	3.60318e-05	2.74831e-05	1.8322e-05	0.120106
1140	2.64854e-05	2.02016e-05	1.34677e-05	0.0882846
1141	1.99038e-05	1.51816e-05	1.0121e-05	0.0663461
1142	2.40589e-05	1.83508e-05	1.22339e-05	0.0801964
1143	2.11242e-05	1.61124e-05	1.07416e-05	0.0704141
1144	2.24886e-05	1.71531e-05	1.14354e-05	0.074962
1145	4.55537e-05	3.47459e-05	2.31639e-05	0.151846
1146	3.39452e-05	2.58915e-05	1.7261e-05	0.113151
1147	4.36482e-05	3.32924e-05	2.2195e-05	0.145494
1148	4.12294e-05	3.14475e-05	2.0965e-05	0.137431
1149	3.15272e-05	2.40472e-05	1.60315e-05	0.105091
1150	3.69992e-05	2.82209e-05	1.8814e-05	0.123331
1151	3.03933e-05	2.31823e-05	1.54549e-05	0.101311
1152	1.94112e-05	1.48058e-05	9.87055e-06	0.0647041
1153	4.05859e-05	3.09567e-05	2.06378e-05	0.135286
1154	2.5696e-05	1.95995e-05	1.30663e-05	0.0856532
1155	4.91817e-05	3.75131e-05	2.50088e-05	0.163939
1156	1.89245e-05	1.44346e-05	9.62304e-06	0.0630816
1157	1.3965e-05	1.06517e-05	7.10115e-06	0.0465499
1158	2.39703e-05	1.82832e-05	1.21888e-05	0.079901
1159	1.52571e-05	1.16373e-05	7.75819e-06	0.050857
1160	1.66627e-05	1.27094e-05	8.47293e-06	0.0555423
1161	2.12393e-05	1.62002e-05	1.08001e-05	0.0707976
1162	4.3205e-05	3.29544e-05	2.19696e-05	0.144017
1163	2.55409e-05	1.94812e-05	1.29875e-05	0.0851364
1164	2.87587e-05	2.19356e-05	1.46237e-05	0.0958625
1165	2.22447e-05	1.6967e-05	1.13114e-05	0.074149
1166	2.05656e-05	1.56863e-05	1.04576e-05	0.0685521
1167	3.99662e-05	3.04841e-05	2.03227e-05	0.133221
1168	2.26931e-05	1.73091e-05	1.15394e-05	0.0756438
1169	5.60277e-05	4.27349e-05	2.84899e-05	0.186759
1170	1.76237e-05	1.34424e-05	8.96158e-06	0.0587456
1171	5.90841e-05	4.50661e-05	3.00441e-05	0.196947
1172	3.22973e-05	2.46346e-05	1.64231e-05	0.107658
1173	5.20842e-05	3.9727e-05	2.64847e-05	0.173614
1174	9.83552e-05	7.50199e-05	5.00133e-05	0.327851
1175	1.68887e-05	1.28818e-05	8.58786e-06	0.0562958
1176	2.82488e-05	2.15466e-05	1.43644e-05	0.0941625
1177	2.45618e-05	1.87344e-05	1.24896e-05	0.0818727
1178	2.60802e-05	1.98925e-05	1.32617e-05	0.0869339
1179	3.61521e-05	2.75748e-05	1.83832e-05	0.120507
1180	3.55455e-05	2.71122e-05	1.80748e-05	0.118485
1181	3.82871e-05	2.92033e-05	1.94689e-05	0.127624
1182	4.89028e-05	3.73003e-05	2.48669e-05	0.163009
1183	2.26448e-05	1.72722e-05	1.15148e-05	0.0754828
1184	1.60926e-05	1.22746e-05	8.18304e-06	0.0536421
1185	4.22585e-05	3.22324e-05	2.14883e-05	0.140862
1186	8.8222e-05	6.72909e-05	4.48606e-05	0.294073
1187	3.0694e-05	2.34117e-05	1.56078e-05	0.102313
1188	2.50056e-05	1.90729e-05	1.27153e-05	0.083352
1189	2.15317e-05	1.64232e-05	1.09488e-05	0.0717725
1190	1.41242e-05	1.07731e-05	7.18208e-06	0.0470805
1191	3.61747e-05	2.75921e-05	1.83947e-05	0.120582
1192	2.74264e-05	2.09193e-05	1.39462e-05	0.0914213
1193	1.63218e-05	1.24493e-05	8.29956e-06	0.0544058
1194	5.32665e-05	4.06288e-05	2.70858e-05	0.177555
1195	1.61203e-05	1.22957e-05	8.19714e-06	0.0537345
1196	4.20869e-05	3.21016e-05	2.14011e-05	0.14029
1197	3.70544e-05	2.82631e-05	1.88421e-05	0.123515
1198	3.43602e-05	2.62081e-05	1.74721e-05	0.114534
1199	6.2552e-05	4.77112e-05	3.18075e-05	0.208507
1200	3.38264e-05	2.58009e-05	1.72006e-05	0.112755
1201	1.34355e-05	1.02478e-05	6.83189e-06	0.0447849
1202	2.61091e-05	1.99146e-05	1.32764e-05	0.0870303
1203	2.42272e-05	1.84792e-05	1.23195e-05	0.0807574
1204	1.53712e-05	1.17243e-05	7.81619e-06	0.0512372
1205	3.52249e-05	2.68676e-05	1.79118e-05	0.117416
1206	4.96363e-05	3.78599e-05	2.52399e-05	0.165454
1207	2.65195e-05	2.02276e-05	1.34851e-05	0.0883983
1208	2.17733e-05	1.66074e-05	1.10716e-05	0.0725775
1209	2.43307e-05	1.85581e-05	1.23721e-05	0.0811024
1210	2.62521e-05	2.00237e-05	1.33491e-05	0.0875071
1211	6.02948e-05	4.59896e-05	3.06597e-05	0.200983
1212	1.46521e-05	1.11758e-05	7.45054e-06	0.0488403
1213	3.95043e-05	3.01317e-05	2.00878e-05	0.131681
1214	2.75113e-05	2.09841e-05	1.39894e-05	0.0917043
1215	2.83429e-05	2.16184e-05	1.44123e-05	0.0944762
1216	2.22142e-05	1.69437e-05	1.12958e-05	0.0740472
1217	2.88471e-05	2.2003e-05	1.46686e-05	0.0961569
1218	5.60529e-05	4.27541e-05	2.85027e-05	0.186843
1219	1.28617e-05	9.81017e-06	6.54011e-06	0.0428722
1220	2.11656e-05	1.61439e-05	1.07626e-05	0.0705519
1221	1.97263e-05	1.50461e-05	1.00307e-05	0.0657542
1222	6.07405e-05	4.63295e-05	3.08863e-05	0.202468
1223	7.30276e-05	5.57015e-05	3.71343e-05	0.243425
1224	0.000151044	0.000115208	7.68055e-05	0.503481
1225	4.28258e-05	3.26651e-05	2.17768e-05	0.142753
1226	2.19007e-05	1.67047e-05	1.11365e-05	0.0730025
1227	1.46853e-05	1.12012e-05	7.46743e-06	0.048951
1228	1.76226e-05	1.34415e-05	8.96103e-06	0.058742
1229	3.47814e-05	2.65293e-05	1.76862e-05	0.115938
1230	1.87266e-05	1.42836e-05	9.52239e-06	0.0624218
1231	6.26821e-05	4.78105e-05	3.18737e-05	0.20894
1232	5.04513e-05	3.84814e-05	2.56543e-05	0.168171
1233	2.17747e-05	1.66086e-05	1.10724e-05	0.0725825
1234	1.82804e-05	1.39433e-05	9.29553e-06	0.0609347
1235	2.3514e-05	1.79352e-05	1.19568e-05	0.0783801
1236	4.11978e-05	3.14235e-05	2.0949e-05	0.137326
1237	3.46416e-05	2.64227e-05	1.76151e-05	0.115472
1238	1.40796e-05	1.07391e-05	7.15943e-06	0.046932
1239	4.81183e-05	3.6702e-05	2.4468e-05	0.160394
1240	8.4538e-06	6.44809e-06	4.29873e-06	0.0281793
1241	2.09948e-05	1.60137e-05	1.06758e-05	0.0699828
1242	5.47918e-05	4.17921e-05	2.78614e-05	0.182639
1243	2.74929e-05	2.09701e-05	1.39801e-05	0.091643
1244	9.51429e-05	7.25698e-05	4.83798e-05	0.317143
1245	9.53647e-06	7.2739e-06	4.84926e-06	0.0317882
1246	4.15692e-05	3.17067e-05	2.11378e-05	0.138564
1247	4.56909e-05	3.48505e-05	2.32337e-05	0.152303
1248	2.88047e-05	2.19706e-05	1.46471e-05	0.0960155
1249	5.18927e-05	3.95809e-05	2.63873e-05	0.172976
1250	5.57295e-05	4.25074e-05	2.83383e-05	0.185765
1251	3.25502e-05	2.48275e-05	1.65517e-05	0.108501
1252	1.56985e-05	1.1974e-05	7.98263e-06	0.0523283
1253	4.13331e-05	3.15267e-05	2.10178e-05	0.137777
1254	2.49476e-05	1.90286e-05	1.26858e-05	0.0831586
1255	0.000101914	7.77342e-05	5.18228e-05	0.339712
1256	1.51398e-05	1.15478e-05	7.69855e-06	0.0504661
1257	2.21327e-05	1.68816e-05	1.12544e-05	0.0737756
1258	2.36449e-05	1.8035e-05	1.20233e-05	0.0788162
1259	0.000122983	9.38045e-05	6.25363e-05	0.409943
1260	4.50699e-05	3.43768e-05	2.29179e-05	0.150233
1261	3.45591e-05	2.63598e-05	1.75732e-05	0.115197
1262	1.65446e-05	1.26193e-05	8.41289e-06	0.0551488
1263	4.13296e-05	3.15239e-05	2.10159e-05	0.137765
1264	3.18964e-05	2.43288e-05	1.62192e-05	0.106321
1265	1.22511e-05	9.34444e-06	6.22963e-06	0.0408369
1266	2.17724e-05	1.66068e-05	1.10712e-05	0.0725746
1267	5.42516e-05	4.13801e-05	2.75868e-05	0.180839
1268	1.12011e-05	8.54361e-06	5.69574e-06	0.0373371
1269	1.56003e-05	1.1899e-05	7.9327e-06	0.052001
1270	1.17772e-05	8.98298e-06	5.98865e-06	0.0392572
1271	2.80045e-05	2.13603e-05	1.42402e-05	0.0933482
1272	2.98625e-05	2.27775e-05	1.5185e-05	0.0995417
1273	1.85447e-05	1.41449e-05	9.42991e-06	0.0618156
1274	4.72755e-05	3.60591e-05	2.40394e-05	0.157585
1275	1.75175e-05	1.33614e-05	8.9076e-06	0.0583917
1276	2.3387e-05	1.78383e-05	1.18922e-05	0.0779567
1277	1.25568e-05	9.57763e-06	6.38509e-06	0.041856
1278	5.67263e-05	4.32677e-05	2.88451e-05	0.189088
1279	1.95801e-05	1.49346e-05	9.95643e-06	0.0652671
1280	2.98883e-05	2.27971e-05	1.51981e-05	0.0996276
1281	6.70559e-05	5.11465e-05	3.40977e-05	0.22352
1282	2.77916e-05	2.11979e-05	1.4132e-05	0.0926388
1283	2.56303e-05	1.95494e-05	1.30329e-05	0.0854343
1284	8.45972e-05	6.45261e-05	4.30174e-05	0.281991
1285	5.62846e-05	4.29308e-05	2.86205e-05	0.187615
1286	2.40184e-05	1.83199e-05	1.22133e-05	0.0800614
1287	1.19438e-05	9.11005e-06	6.07336e-06	0.0398125
1288	7.29206e-05	5.56198e-05	3.70799e-05	0.243069
1289	2.21122e-05	1.6866e-05	1.1244e-05	0.0737073
1290	7.77519e-05	5.93049e-05	3.95366e-05	0.259173
1291	2.40559e-05	1.83485e-05	1.22323e-05	0.0801863
1292	2.58747e-05	1.97358e-05	1.31572e-05	0.0862489
1293	3.6469e-05	2.78166e-05	1.85444e-05	0.121563
1294	2.93672e-05	2.23997e-05	1.49331e-05	0.0978907
1295	2.58711e-05	1.9733e-05	1.31553e-05	0.0862369
1296	1.12321e-05	8.56721e-06	5.71147e-06	0.0374403
1297	1.94278e-05	1.48185e-05	9.87897e-06	0.0647593
1298	5.2894e-05	4.03446e-05	2.68964e-05	0.176313
1299	1.46872e-05	1.12026e-05	7.46842e-06	0.0489575
1300	5.5739e-05	4.25146e-05	2.83431e-05	0.185797
1301	3.75177e-05	2.86164e-05	1.90776e-05	0.125059
1302	3.59394e-05	2.74126e-05	1.82751e-05	0.119798
1303	2.75453e-05	2.101e-05	1.40067e-05	0.0918176
1304	2.15232e-05	1.64167e-05	1.09445e-05	0.071744
1305	1.66999e-05	1.27378e-05	8.49184e-06	0.0556663
1306	5.02628e-05	3.83377e-05	2.55585e-05	0.167543
1307	1.27841e-05	9.75099e-06	6.50066e-06	0.0426136
1308	4.34181e-05	3.31169e-05	2.20779e-05	0.144727
1309	8.63398e-05	6.58553e-05	4.39035e-05	0.287799
1310	1.23743e-05	9.43842e-06	6.29228e-06	0.0412476
1311	2.23331e-05	1.70345e-05	1.13563e-05	0.0744438
1312	4.7837e-05	3.64874e-05	2.43249e-05	0.159457
1313	3.30044e-05	2.5174e-05	1.67826e-05	0.110015
1314	3.6491e-05	2.78333e-05	1.85556e-05	0.121637
1315	1.99104e-05	1.51865e-05	1.01244e-05	0.0663679
1316	4.75419e-05	3.62624e-05	2.41749e-05	0.158473
1317	2.18931e-05	1.66989e-05	1.11326e-05	0.0729771
1318	1.59703e-05	1.21812e-05	8.12082e-06	0.0532342
1319	2.45747e-05	1.87443e-05	1.24962e-05	0.0819158
1320	1.9665e-05	1.49994e-05	9.9996e-06	0.0655501
1321	1.56983e-05	1.19738e-05	7.98253e-06	0.0523277
1322	2.75122e-05	2.09848e-05	1.39899e-05	0.0917073
1323	2.12302e-05	1.61933e-05	1.07955e-05	0.0707675
1324	2.97953e-05	2.27262e-05	1.51508e-05	0.0993176
1325	3.24657e-05	2.47631e-05	1.65087e-05	0.108219
1326	6.66769e-05	5.08575e-05	3.3905e-05	0.222256
1327	5.00174e-05	3.81505e-05	2.54337e-05	0.166725
1328	3.4699e-05	2.64665e-05	1.76443e-05	0.115663
1329	3.46748e-05	2.6448e-05	1.7632e-05	0.115583
1330	2.78482e-05	2.12411e-05	1.41607e-05	0.0928274
1331	2.07459e-05	1.58238e-05	1.05492e-05	0.069153
1332	2.94842e-05	2.24889e-05	1.49926e-05	0.0982806
1333	9.63663e-06	7.35029e-06	4.90019e-06	0.0321221
1334	2.83083e-05	2.1592e-05	1.43947e-05	0.0943608
1335	4.96053e-05	3.78362e-05	2.52241e-05	0.165351
1336	1.58861e-05	1.21171e-05	8.07805e-06	0.0529538
1337	2.0271e-05	1.54616e-05	1.03077e-05	0.0675701
1338	1.70482e-05	1.30034e-05	8.66893e-06	0.0568272
1339	2.2146e-05	1.68917e-05	1.12612e-05	0.0738199
1340	1.85056e-05	1.4115e-05	9.41001e-06	0.0616852
1341	5.76024e-05	4.39359e-05	2.92906e-05	0.192008
1342	5.72106e-05	4.36371e-05	2.90914e-05	0.190702
1343	3.28986e-05	2.50932e-05	1.67288e-05	0.109662
1344	3.01428e-05	2.29913e-05	1.53275e-05	0.100476
1345	4.3618e-05	3.32694e-05	2.21796e-05	0.145393
1346	3.93151e-05	2.99874e-05	1.99916e-05	0.13105
1347	2.84924e-05	2.17325e-05	1.44883e-05	0.0949748
1348	4.11518e-05	3.13883e-05	2.09255e-05	0.137173
1349	2.1782e-05	1.66141e-05	1.10761e-05	0.0726067
1350	2.56981e-05	1.96011e-05	1.30674e-05	0.0856602
1351	8.16166e-05	6.22526e-05	4.15018e-05	0.272055
1352	2.88556e-05	2.20095e-05	1.4673e-05	0.0961854
1353	3.53467e-05	2.69605e-05	1.79737e-05	0.117822
1354	2.61045e-05	1.99111e-05	1.32741e-05	0.0870152
1355	4.56848e-05	3.48459e-05	2.32306e-05	0.152283
1356	2.63382e-05	2.00893e-05	1.33929e-05	0.0877939
1357	3.0383e-05	2.31745e-05	1.54496e-05	0.101277
1358	2.97037e-05	2.26564e-05	1.51042e-05	0.0990124
1359	2.43052e-05	1.85387e-05	1.23591e-05	0.0810174
1360	1.10421e-05	8.42229e-06	5.61486e-06	0.0368069
1361	5.00219e-05	3.81539e-05	2.5436e-05	0.16674
1362	3.49103e-05	2.66277e-05	1.77518e-05	0.116368
1363	3.25093e-05	2.47963e-05	1.65309e-05	0.108364
1364	5.39514e-05	4.11512e-05	2.74341e-05	0.179838
1365	4.73901e-05	3.61466e-05	2.40977e-05	0.157967
1366	4.80437e-05	3.66451e-05	2.44301e-05	0.160146
1367	3.3729e-05	2.57266e-05	1.71511e-05	0.11243
1368	2.48989e-05	1.89915e-05	1.2661e-05	0.0829964
1369	4.18918e-05	3.19528e-05	2.13018e-05	0.139639
1370	3.83473e-05	2.92492e-05	1.94995e-05	0.127824
1371	2.12143e-05	1.61811e-05	1.07874e-05	0.0707144
1372	1.55193e-05	1.18373e-05	7.89153e-06	0.0517311
1373	6.21007e-05	4.7367e-05	3.1578e-05	0.207002
1374	1.16894e-05	8.91603e-06	5.94402e-06	0.0389646
1375	1.84424e-05	1.40668e-05	9.37788e-06	0.0614745
1376	2.52107e-05	1.92293e-05	1.28195e-05	0.0840356
1377	3.1172e-05	2.37763e-05	1.58509e-05	0.103907
1378	9.80666e-06	7.47998e-06	4.98665e-06	0.0326889
1379	3.65218e-05	2.78569e-05	1.85712e-05	0.121739
1380	5.64742e-05	4.30754e-05	2.87169e-05	0.188247
1381	7.8078e-05	5.95536e-05	3.97024e-05	0.26026
1382	7.88927e-05	6.0175e-05	4.01167e-05	0.262976
1383	1.16236e-05	8.86585e-06	5.91057e-06	0.0387454
1384	5.45098e-05	4.15771e-05	2.7718e-05	0.181699
1385	2.62566e-05	2.00271e-05	1.33514e-05	0.0875219
1386	3.30287e-05	2.51925e-05	1.6795e-05	0.110096
1387	5.27126e-05	4.02063e-05	2.68042e-05	0.175709
1388	2.38601e-05	1.81991e-05	1.21328e-05	0.0795336
1389	1.95268e-05	1.4894e-05	9.92932e-06	0.0650894
1390	0.000133548	0.000101863	6.79085e-05	0.445158
1391	2.09484e-05	1.59783e-05	1.06522e-05	0.0698281
1392	1.42416e-05	1.08627e-05	7.2418e-06	0.0474719
1393	2.75534e-05	2.10162e-05	1.40108e-05	0.0918447
1394	2.32875e-05	1.77624e-05	1.18416e-05	0.0776249
1395	3.44305e-05	2.62617e-05	1.75078e-05	0.114768
1396	1.73071e-05	1.32009e-05	8.80063e-06	0.0576905
1397	5.10746e-05	3.89569e-05	2.59713e-05	0.170249
1398	3.4542e-05	2.63468e-05	1.75645e-05	0.11514
1399	4.07746e-05	3.11006e-05	2.07337e-05	0.135915
1400	3.63983e-05	2.77626e-05	1.85084e-05	0.121328
1401	2.94846e-05	2.24892e-05	1.49928e-05	0.0982819
1402	2.48712e-05	1.89704e-05	1.26469e-05	0.082904
1403	3.69e-05	2.81453e-05	1.87635e-05	0.123
1404	3.83159e-05	2.92253e-05	1.94835e-05	0.12772
1405	3.43115e-05	2.61709e-05	1.74473e-05	0.114372
1406	4.47999e-05	3.41709e-05	2.27806e-05	0.149333
1407	5.13135e-05	3.91391e-05	2.60927e-05	0.171045
1408	3.51689e-05	2.68249e-05	1.78833e-05	0.11723
1409	7.61717e-06	5.80996e-06	3.87331e-06	0.0253906
1410	7.30662e-05	5.57309e-05	3.71539e-05	0.243554
1411	2.91606e-05	2.22421e-05	1.4828e-05	0.0972018
1412	3.14362e-05	2.39778e-05	1.59852e-05	0.104787
1413	5.88591e-05	4.48945e-05	2.99297e-05	0.196197
1414	3.26878e-05	2.49325e-05	1.66217e-05	0.108959
1415	4.79858e-05	3.66009e-05	2.44006e-05	0.159953
1416	4.24175e-05	3.23538e-05	2.15692e-05	0.141392
1417	8.41514e-06	6.41861e-06	4.27907e-06	0.0280505
1418	6.116e-06	4.66495e-06	3.10996e-06	0.0203867
1419	4.20346e-05	3.20616e-05	2.13744e-05	0.140115
1420	2.75257e-05	2.09951e-05	1.39967e-05	0.0917524
1421	2.96904e-05	2.26462e-05	1.50975e-05	0.0989679
1422	1.32359e-05	1.00956e-05	6.73043e-06	0.0441198
1423	4.16343e-05	3.17564e-05	2.11709e-05	0.138781
1424	2.463e-05	1.87864e-05	1.25243e-05	0.0821001
1425	2.77407e-05	2.11591e-05	1.4106e-05	0.0924689
1426	8.49558e-06	6.47996e-06	4.31998e-06	0.0283186
1427	3.6343e-05	2.77205e-05	1.84803e-05	0.121143
1428	3.62452e-05	2.76458e-05	1.84305e-05	0.120817
1429	1.2393e-05	9.45268e-06	6.30179e-06	0.0413099
1430	8.50781e-05	6.48929e-05	4.32619e-05	0.283594
1431	3.57332e-05	2.72553e-05	1.81702e-05	0.119111
1432	3.62296e-05	2.7634e-05	1.84226e-05	0.120765
1433	2.1712e-05	1.65607e-05	1.10405e-05	0.0723734
1434	3.56288e-05	2.71757e-05	1.81171e-05	0.118763
1435	2.80653e-05	2.14066e-05	1.42711e-05	0.0935508
1436	4.43086e-05	3.37962e-05	2.25308e-05	0.147695
1437	1.47145e-05	1.12234e-05	7.48228e-06	0.0490483
1438	5.18253e-05	3.95295e-05	2.6353e-05	0.172751
1439	3.74638e-05	2.85754e-05	1.90502e-05	0.124879
1440	2.58862e-05	1.97446e-05	1.3163e-05	0.0862873
1441	2.9369e-05	2.2401e-05	1.4934e-05	0.0978966
1442	4.41973e-05	3.37113e-05	2.24742e-05	0.147324
1443	3.90914e-05	2.98168e-05	1.98779e-05	0.130305
1444	3.08744e-05	2.35493e-05	1.56995e-05	0.102915
1445	4.92072e-05	3.75325e-05	2.50217e-05	0.164024
1446	3.79188e-05	2.89223e-05	1.92816e-05	0.126396
1447	4.98344e-05	3.8011e-05	2.53406e-05	0.166115
1448	3.69502e-05	2.81836e-05	1.87891e-05	0.123167
1449	3.88399e-05	2.9625e-05	1.975e-05	0.129466
1450	2.20004e-05	1.67807e-05	1.11871e-05	0.0733346
1451	1.70192e-05	1.29813e-05	8.65421e-06	0.0567307
1452	1.59792e-05	1.21881e-05	8.12539e-06	0.0532641
1453	2.53739e-05	1.93538e-05	1.29025e-05	0.0845796
1454	4.48901e-05	3.42397e-05	2.28265e-05	0.149634
1455	3.01664e-05	2.30092e-05	1.53395e-05	0.100555
1456	2.74313e-05	2.09231e-05	1.39487e-05	0.0914378
1457	3.39794e-05	2.59177e-05	1.72784e-05	0.113265
1458	3.11466e-05	2.37569e-05	1.58379e-05	0.103822
1459	1.92672e-05	1.4696e-05	9.7973e-06	0.064224
1460	1.58223e-05	1.20684e-05	8.04558e-06	0.0527409
1461	1.96236e-05	1.49678e-05	9.97852e-06	0.0654119
1462	2.97008e-05	2.26541e-05	1.51027e-05	0.0990025
1463	1.84708e-05	1.40885e-05	9.39233e-06	0.0615692
1464	2.68609e-05	2.0488e-05	1.36587e-05	0.0895362
1465	3.49921e-05	2.66901e-05	1.77934e-05	0.11664
1466	2.52509e-05	1.926e-05	1.284e-05	0.0841697
1467	3.71375e-05	2.83265e-05	1.88843e-05	0.123792
1468	4.83601e-05	3.68864e-05	2.45909e-05	0.1612
1469	3.31765e-05	2.53052e-05	1.68701e-05	0.110588
1470	3.17104e-05	2.4187e-05	1.61246e-05	0.105701
1471	1.87286e-05	1.42852e-05	9.52345e-06	0.0624288
1472	5.84685e-05	4.45966e-05	2.97311e-05	0.194895
1473	1.10353e-05	8.41715e-06	5.61144e-06	0.0367845
1474	2.27558e-05	1.73568e-05	1.15712e-05	0.0758525
1475	4.88069e-05	3.72272e-05	2.48181e-05	0.16269
1476	4.29348e-05	3.27483e-05	2.18322e-05	0.143116
1477	2.62082e-05	1.99902e-05	1.33268e-05	0.0873608
1478	3.86686e-05	2.94943e-05	1.96628e-05	0.128895
1479	4.73588e-05	3.61227e-05	2.40818e-05	0.157863
1480	4.97247e-05	3.79272e-05	2.52848e-05	0.165749
1481	0.000144892	0.000110516	7.3677e-05	0.482973
1482	5.18835e-05	3.95739e-05	2.63826e-05	0.172945
1483	5.26124e-05	4.01299e-05	2.67532e-05	0.175375
1484	6.52525e-05	4.9771e-05	3.31807e-05	0.217508
1485	3.23678e-05	2.46884e-05	1.64589e-05	0.107893
1486	2.73661e-05	2.08734e-05	1.39156e-05	0.0912204
1487	9.57281e-06	7.30162e-06	4.86774e-06	0.0319094
1488	5.10822e-05	3.89627e-05	2.59751e-05	0.170274
1489	2.4186e-05	1.84477e-05	1.22985e-05	0.0806199
1490	2.25113e-05	1.71704e-05	1.14469e-05	0.0750378
1491	3.13577e-05	2.39179e-05	1.59453e-05	0.104526
1492	0.000115534	8.81227e-05	5.87485e-05	0.385112
1493	2.8166e-05	2.14835e-05	1.43223e-05	0.0938865
1494	5.03112e-05	3.83746e-05	2.55831e-05	0.167704
1495	2.22492e-05	1.69705e-05	1.13136e-05	0.074164
1496	1.79112e-05	1.36617e-05	9.1078e-06	0.0597041
1497	5.82693e-05	4.44446e-05	2.96297e-05	0.194231
1498	2.60386e-05	1.98608e-05	1.32405e-05	0.0867952
1499	2.39664e-05	1.82802e-05	1.21868e-05	0.0798879
1500	2.54377e-05	1.94025e-05	1.2935e-05	0.0847924
1501	0.000108967	8.31142e-05	5.54095e-05	0.363224
1502	4.5855e-05	3.49757e-05	2.33171e-05	0.15285
1503	2.63198e-05	2.00753e-05	1.33835e-05	0.0877326
1504	1.71282e-05	1.30644e-05	8.70962e-06	0.0570939
1505	1.19472e-05	9.11266e-06	6.07511e-06	0.039824
1506	2.41782e-05	1.84418e-05	1.22945e-05	0.0805941
1507	3.65058e-05	2.78446e-05	1.85631e-05	0.121686
1508	2.64477e-05	2.01728e-05	1.34486e-05	0.0881589
1509	3.37027e-05	2.57065e-05	1.71377e-05	0.112342
1510	3.67998e-05	2.80688e-05	1.87126e-05	0.122666
1511	5.57946e-05	4.25571e-05	2.83714e-05	0.185982
1512	7.43015e-05	5.66731e-05	3.77821e-05	0.247672
1513	2.34282e-05	1.78698e-05	1.19132e-05	0.0780941
1514	5.21368e-05	3.97671e-05	2.65114e-05	0.173789
1515	1.51751e-05	1.15747e-05	7.7165e-06	0.0505837
1516	2.47738e-05	1.88961e-05	1.25974e-05	0.0825795
1517	6.29484e-05	4.80136e-05	3.2009e-05	0.209828
1518	2.79505e-05	2.13191e-05	1.42128e-05	0.0931684
1519	0.0001076	8.20717e-05	5.47144e-05	0.358668
1520	3.21391e-05	2.45139e-05	1.63426e-05	0.10713
1521	3.11644e-05	2.37705e-05	1.5847e-05	0.103881
1522	2.02182e-05	1.54214e-05	1.02809e-05	0.0673941
1523	4.21478e-05	3.21481e-05	2.1432e-05	0.140493
1524	4.30059e-05	3.28025e-05	2.18683e-05	0.143353
1525	2.26024e-05	1.72399e-05	1.14933e-05	0.0753414
1526	3.23801e-05	2.46978e-05	1.64652e-05	0.107934
1527	2.51492e-05	1.91824e-05	1.27883e-05	0.0838307
1528	4.73345e-05	3.61042e-05	2.40694e-05	0.157782
1529	4.3495e-05	3.31756e-05	2.21171e-05	0.144983
1530	2.4982e-05	1.90549e-05	1.27033e-05	0.0832733
1531	1.86175e-05	1.42004e-05	9.46693e-06	0.0620583
1532	2.91363e-05	2.22236e-05	1.48157e-05	0.0971211
1533	5.34012e-05	4.07315e-05	2.71543e-05	0.178004
1534	7.34148e-05	5.59968e-05	3.73312e-05	0.244716
1535	2.43009e-05	1.85354e-05	1.23569e-05	0.0810031
1536	3.91391e-05	2.98531e-05	1.99021e-05	0.130464
1537	1.56619e-05	1.19461e-05	7.96405e-06	0.0522065
1538	3.2248e-05	2.4597e-05	1.6398e-05	0.107493
1539	3.13624e-05	2.39215e-05	1.59477e-05	0.104541
1540	2.35492e-05	1.7962e-05	1.19747e-05	0.0784973
1541	2.79981e-05	2.13554e-05	1.4237e-05	0.0933271
1542	2.45762e-05	1.87454e-05	1.24969e-05	0.0819208
1543	3.43025e-05	2.6164e-05	1.74427e-05	0.114342
1544	5.63164e-05	4.29551e-05	2.86367e-05	0.187721
1545	8.87887e-06	6.77231e-06	4.51487e-06	0.0295962
1546	2.08588e-05	1.59099e-05	1.06066e-05	0.0695292
1547	4.37918e-05	3.3402e-05	2.2268e-05	0.145973
1548	8.14686e-05	6.21398e-05	4.14265e-05	0.271562
1549	5.78506e-05	4.41253e-05	2.94168e-05	0.192835
1550	6.48486e-05	4.9463e-05	3.29753e-05	0.216162
1551	2.50901e-05	1.91374e-05	1.27583e-05	0.0836338
1552	2.57585e-05	1.96472e-05	1.30981e-05	0.0858618
1553	6.2643e-05	4.77806e-05	3.18537e-05	0.20881
1554	8.59974e-05	6.55941e-05	4.37294e-05	0.286658
1555	4.58703e-05	3.49874e-05	2.33249e-05	0.152901
1556	0.000116867	8.914e-05	5.94267e-05	0.389558
1557	3.2406e-05	2.47175e-05	1.64783e-05	0.10802
1558	3.25089e-05	2.4796e-05	1.65307e-05	0.108363
1559	6.30479e-05	4.80895e-05	3.20597e-05	0.21016
1560	0.000182511	0.00013921	9.28064e-05	0.608371
1561	1.72492e-05	1.31568e-05	8.77118e-06	0.0574975
1562	5.9215e-05	4.5166e-05	3.01107e-05	0.197383
1563	1.9806e-05	1.5107e-05	1.00713e-05	0.0660202
1564	1.64459e-05	1.25441e-05	8.3627e-06	0.0548198
1565	4.34662e-05	3.31536e-05	2.21024e-05	0.144887
1566	3.22227e-05	2.45777e-05	1.63851e-05	0.107409
1567	5.34729e-05	4.07862e-05	2.71908e-05	0.178243
1568	4.51269e-05	3.44203e-05	2.29469e-05	0.150423
1569	2.5705e-05	1.96064e-05	1.30709e-05	0.0856835
1570	4.46188e-05	3.40328e-05	2.26885e-05	0.148729
1571	1.37692e-05	1.05024e-05	7.00161e-06	0.0458974
1572	2.49655e-05	1.90423e-05	1.26949e-05	0.0832184
1573	2.5976e-05	1.9813e-05	1.32087e-05	0.0865866
1574	3.42467e-05	2.61215e-05	1.74143e-05	0.114156
1575	1.32236e-05	1.00862e-05	6.72415e-06	0.0440786
1576	2.8735e-05	2.19175e-05	1.46116e-05	0.0957833
1577	1.50796e-05	1.15019e-05	7.66793e-06	0.0502653
1578	4.53138e-05	3.45629e-05	2.30419e-05	0.151046
1579	5.34324e-05	4.07553e-05	2.71702e-05	0.178108
1580	5.07536e-05	3.87121e-05	2.58081e-05	0.169179
1581	2.84763e-05	2.17201e-05	1.44801e-05	0.0949208
1582	4.98792e-05	3.80451e-05	2.53634e-05	0.166264
1583	3.4845e-05	2.65778e-05	1.77186e-05	0.11615
1584	3.77197e-05	2.87705e-05	1.91804e-05	0.125732
1585	1.89163e-05	1.44283e-05	9.61889e-06	0.0630544
1586	5.44707e-05	4.15473e-05	2.76982e-05	0.181569
1587	2.96119e-05	2.25863e-05	1.50576e-05	0.0987063
1588	1.37027e-05	1.04517e-05	6.96778e-06	0.0456757
1589	5.25277e-05	4.00652e-05	2.67102e-05	0.175092
1590	7.8286e-05	5.97122e-05	3.98082e-05	0.260953
1591	4.8777e-05	3.72044e-05	2.48029e-05	0.16259
1592	1.62862e-05	1.24222e-05	8.28148e-06	0.0542874
1593	2.89907e-05	2.21125e-05	1.47417e-05	0.0966356
1594	3.8316e-05	2.92253e-05	1.94835e-05	0.12772
1595	1.21531e-05	9.26975e-06	6.17983e-06	0.0405105
1596	2.68772e-05	2.05004e-05	1.3667e-05	0.0895906
1597	1.61721e-05	1.23352e-05	8.22345e-06	0.053907
1598	4.51148e-05	3.44111e-05	2.29407e-05	0.150383
1599	4.9249e-05	3.75644e-05	2.50429e-05	0.164163
1600	4.73136e-05	3.60882e-05	2.40588e-05	0.157712
1601	6.12038e-05	4.66829e-05	3.11219e-05	0.204013
1602	1.68952e-05	1.28868e-05	8.59118e-06	0.0563175
1603	2.37248e-05	1.8096e-05	1.2064e-05	0.0790828
1604	3.71768e-05	2.83564e-05	1.89043e-05	0.123923
1605	4.40593e-05	3.3606e-05	2.2404e-05	0.146864
1606	9.28293e-06	7.08051e-06	4.72034e-06	0.0309431
1607	1.18004e-05	9.00069e-06	6.00046e-06	0.0393346
1608	2.71485e-05	2.07074e-05	1.38049e-05	0.0904952
1609	2.49956e-05	1.90652e-05	1.27102e-05	0.0833186
1610	6.94889e-05	5.30023e-05	3.53349e-05	0.23163
1611	3.57412e-05	2.72614e-05	1.81743e-05	0.119137
1612	6.49441e-05	4.95358e-05	3.30239e-05	0.21648
1613	3.7726e-05	2.87753e-05	1.91835e-05	0.125753
1614	3.97568e-05	3.03243e-05	2.02162e-05	0.132523
1615	8.42302e-05	6.42462e-05	4.28308e-05	0.280767
1616	3.97561e-05	3.03238e-05	2.02159e-05	0.13252
1617	3.47801e-05	2.65283e-05	1.76855e-05	0.115934
1618	2.6692e-05	2.03592e-05	1.35728e-05	0.0889733
1619	4.23523e-05	3.2304e-05	2.1536e-05	0.141174
1620	3.119e-05	2.379e-05	1.586e-05	0.103967
1621	3.45842e-05	2.63789e-05	1.75859e-05	0.115281
1622	4.8761e-05	3.71922e-05	2.47948e-05	0.162537
1623	8.21033e-05	6.26239e-05	4.17493e-05	0.273678
1624	2.30448e-05	1.75773e-05	1.17182e-05	0.0768161
1625	1.18152e-05	9.01195e-06	6.00797e-06	0.0393839
1626	9.7935e-05	7.46994e-05	4.97996e-05	0.32645
1627	3.81644e-05	2.91097e-05	1.94065e-05	0.127215
1628	6.54851e-05	4.99484e-05	3.32989e-05	0.218284
1629	4.06751e-05	3.10248e-05	2.06832e-05	0.135584
1630	4.02355e-05	3.06895e-05	2.04596e-05	0.134118
1631	1.94298e-05	1.482e-05	9.87998e-06	0.0647659
1632	1.60277e-05	1.22251e-05	8.15004e-06	0.0534257
1633	4.22786e-05	3.22478e-05	2.14985e-05	0.140929
1634	3.26908e-05	2.49347e-05	1.66232e-05	0.108969
1635	4.68194e-05	3.57113e-05	2.38075e-05	0.156065
1636	6.22958e-05	4.75158e-05	3.16772e-05	0.207653
1637	6.05947e-05	4.62183e-05	3.08122e-05	0.201982
1638	3.92245e-05	2.99183e-05	1.99455e-05	0.130748
1639	2.8621e-05	2.18305e-05	1.45537e-05	0.0954033
1640	4.30855e-05	3.28633e-05	2.19089e-05	0.143618
1641	3.47454e-05	2.65019e-05	1.76679e-05	0.115818
1642	4.93393e-05	3.76333e-05	2.50889e-05	0.164464
1643	2.79883e-05	2.1348e-05	1.4232e-05	0.0932944
1644	2.36113e-05	1.80094e-05	1.20063e-05	0.0787044
1645	2.19822e-05	1.67668e-05	1.11779e-05	0.0732741
1646	2.75311e-05	2.09992e-05	1.39995e-05	0.0917703
1647	4.06826e-05	3.10305e-05	2.0687e-05	0.135609
1648	0.000145427	0.000110924	7.39491e-05	0.484757
1649	2.41591e-05	1.84272e-05	1.22848e-05	0.0805303
1650	3.13277e-05	2.38951e-05	1.59301e-05	0.104426
1651	7.24644e-05	5.52719e-05	3.68479e-05	0.241548
1652	2.12176e-05	1.61836e-05	1.07891e-05	0.0707253
1653	3.14739e-05	2.40066e-05	1.60044e-05	0.104913
1654	5.20097e-05	3.96701e-05	2.64468e-05	0.173366
1655	5.32559e-05	4.06206e-05	2.70804e-05	0.17752
1656	1.90044e-05	1.44955e-05	9.66366e-06	0.0633479
1657	4.20076e-05	3.20411e-05	2.13607e-05	0.140025
1658	3.26588e-05	2.49103e-05	1.66069e-05	0.108863
1659	2.54177e-05	1.93872e-05	1.29248e-05	0.0847257
1660	1.5801e-05	1.20521e-05	8.03475e-06	0.05267
1661	3.21123e-05	2.44935e-05	1.6329e-05	0.107041
1662	2.76107e-05	2.106e-05	1.404e-05	0.0920358
1663	1.52461e-05	1.16289e-05	7.75259e-06	0.0508203
1664	4.82507e-05	3.6803e-05	2.45353e-05	0.160836
1665	2.23417e-05	1.7041e-05	1.13607e-05	0.0744723
1666	2.06517e-05	1.5752e-05	1.05013e-05	0.068839
1667	2.56536e-05	1.95672e-05	1.30448e-05	0.085512
1668	3.08769e-05	2.35512e-05	1.57008e-05	0.102923
1669	2.58068e-05	1.9684e-05	1.31227e-05	0.0860228
1670	3.8741e-05	2.95495e-05	1.96997e-05	0.129137
1671	1.42842e-05	1.08952e-05	7.26347e-06	0.047614
1672	1.57235e-05	1.1993e-05	7.99533e-06	0.0524115
1673	4.15091e-05	3.16609e-05	2.11072e-05	0.138364
1674	2.58139e-05	1.96894e-05	1.31263e-05	0.0860463
1675	9.2768e-06	7.07583e-06	4.71722e-06	0.0309227
1676	5.7676e-05	4.3992e-05	2.9328e-05	0.192253
1677	5.58495e-05	4.25989e-05	2.83993e-05	0.186165
1678	6.37253e-05	4.86062e-05	3.24041e-05	0.212418
1679	2.99054e-05	2.28102e-05	1.52068e-05	0.0996847
1680	6.13263e-05	4.67764e-05	3.11842e-05	0.204421
1681	3.25012e-05	2.47901e-05	1.65267e-05	0.108337
1682	2.78727e-05	2.12598e-05	1.41732e-05	0.0929091
1683	2.96758e-05	2.26351e-05	1.509e-05	0.0989193
1684	4.1454e-05	3.16189e-05	2.10792e-05	0.13818
1685	4.94649e-05	3.77291e-05	2.51527e-05	0.164883
1686	4.29796e-05	3.27825e-05	2.1855e-05	0.143265
1687	2.71837e-05	2.07342e-05	1.38228e-05	0.0906123
1688	1.83316e-05	1.39823e-05	9.32156e-06	0.0611053
1689	3.73534e-05	2.84911e-05	1.89941e-05	0.124511
1690	2.83233e-05	2.16035e-05	1.44023e-05	0.0944111
1691	4.54578e-05	3.46727e-05	2.31152e-05	0.151526
1692	1.536e-05	1.17157e-05	7.81049e-06	0.0511999
1693	2.40642e-05	1.83549e-05	1.22366e-05	0.080214
1694	4.70387e-05	3.58786e-05	2.39191e-05	0.156796
1695	4.18671e-05	3.19339e-05	2.12893e-05	0.139557
1696	1.68285e-05	1.28359e-05	8.55726e-06	0.0560951
1697	2.84115e-05	2.16707e-05	1.44471e-05	0.0947049
1698	2.21573e-05	1.69004e-05	1.12669e-05	0.0738576
1699	3.246e-05	2.47587e-05	1.65058e-05	0.1082
1700	4.04938e-05	3.08864e-05	2.0591e-05	0.134979
1701	1.607e-05	1.22573e-05	8.17157e-06	0.0535668
1702	1.5682e-05	1.19613e-05	7.97422e-06	0.0522732
1703	3.99901e-05	3.05022e-05	2.03348e-05	0.1333
1704	2.57632e-05	1.96508e-05	1.31005e-05	0.0858774
1705	4.20682e-05	3.20873e-05	2.13915e-05	0.140227
1706	3.36029e-05	2.56305e-05	1.7087e-05	0.11201
1707	2.50842e-05	1.91328e-05	1.27552e-05	0.0836138
1708	3.30734e-05	2.52266e-05	1.68177e-05	0.110245
1709	1.33977e-05	1.0219e-05	6.81268e-06	0.044659
1710	8.45283e-05	6.44735e-05	4.29824e-05	0.281761
1711	1.84347e-05	1.4061e-05	9.374e-06	0.0614491
1712	8.77417e-05	6.69246e-05	4.46164e-05	0.292472
1713	3.06116e-05	2.33489e-05	1.55659e-05	0.102039
1714	3.70179e-05	2.82353e-05	1.88235e-05	0.123393
1715	3.17114e-05	2.41877e-05	1.61251e-05	0.105705
1716	1.76033e-05	1.34268e-05	8.95121e-06	0.0586776
1717	3.64199e-05	2.77791e-05	1.85194e-05	0.1214
1718	3.94954e-05	3.0125e-05	2.00833e-05	0.131651
1719	8.49435e-05	6.47902e-05	4.31935e-05	0.283145
1720	2.4264e-05	1.85072e-05	1.23382e-05	0.0808799
1721	8.11559e-05	6.19013e-05	4.12675e-05	0.27052
1722	3.09454e-05	2.36034e-05	1.57356e-05	0.103151
1723	6.30888e-05	4.81206e-05	3.20804e-05	0.210296
1724	4.67613e-05	3.5667e-05	2.3778e-05	0.155871
1725	4.09513e-05	3.12354e-05	2.08236e-05	0.136504
1726	1.92436e-05	1.4678e-05	9.7853e-06	0.0641453
1727	2.33609e-05	1.78184e-05	1.18789e-05	0.0778697
1728	1.20459e-05	9.18796e-06	6.12531e-06	0.040153
1729	6.03663e-05	4.60441e-05	3.0696e-05	0.201221
1730	4.30864e-05	3.2864e-05	2.19093e-05	0.143621
1731	2.55427e-05	1.94825e-05	1.29884e-05	0.0851422
1732	3.16609e-05	2.41492e-05	1.60995e-05	0.105536
1733	1.68956e-05	1.28871e-05	8.59137e-06	0.0563188
1734	3.82482e-05	2.91736e-05	1.94491e-05	0.127494
1735	1.53882e-05	1.17373e-05	7.82484e-06	0.051294
1736	4.55871e-05	3.47713e-05	2.31809e-05	0.151957
1737	7.84809e-05	5.9861e-05	3.99073e-05	0.261603
1738	3.90591e-05	2.97921e-05	1.98614e-05	0.130197
1739	4.59376e-05	3.50387e-05	2.33591e-05	0.153125
1740	4.94103e-05	3.76874e-05	2.5125e-05	0.164701
1741	2.40522e-05	1.83457e-05	1.22304e-05	0.0801739
1742	6.29464e-05	4.8012e-05	3.2008e-05	0.209821
1743	4.00721e-05	3.05648e-05	2.03765e-05	0.133574
1744	4.38459e-05	3.34432e-05	2.22955e-05	0.146153
1745	3.53623e-05	2.69724e-05	1.79816e-05	0.117874
1746	4.78479e-05	3.64958e-05	2.43305e-05	0.159493
1747	3.0421e-05	2.32035e-05	1.5469e-05	0.101403
1748	5.16911e-05	3.94271e-05	2.62847e-05	0.172304
1749	4.3968e-05	3.35364e-05	2.23576e-05	0.14656
1750	2.19101e-05	1.67118e-05	1.11412e-05	0.0730337
1751	3.52345e-05	2.6875e-05	1.79166e-05	0.117448
1752	2.62578e-05	2.0028e-05	1.3352e-05	0.0875258
1753	3.73678e-05	2.85021e-05	1.90014e-05	0.124559
1754	3.14613e-05	2.3997e-05	1.5998e-05	0.104871
1755	2.43735e-05	1.85907e-05	1.23938e-05	0.0812449
1756	2.92602e-05	2.23181e-05	1.48787e-05	0.097534
1757	3.58199e-05	2.73214e-05	1.82143e-05	0.1194
1758	3.50393e-05	2.6726e-05	1.78173e-05	0.116798
1759	3.6613e-05	2.79264e-05	1.86176e-05	0.122043
1760	1.52337e-05	1.16194e-05	7.74626e-06	0.0507788
1761	3.31499e-05	2.52849e-05	1.68566e-05	0.1105
1762	2.93629e-05	2.23964e-05	1.49309e-05	0.0978762
1763	5.74173e-05	4.37947e-05	2.91965e-05	0.191391
1764	4.22533e-05	3.22285e-05	2.14857e-05	0.140844
1765	1.09007e-05	8.31449e-06	5.543e-06	0.0363358
1766	1.60157e-05	1.22159e-05	8.14393e-06	0.0533856
1767	2.43514e-05	1.85739e-05	1.23826e-05	0.0811713
1768	3.65021e-05	2.78418e-05	1.85612e-05	0.121674
1769	3.36774e-05	2.56873e-05	1.71248e-05	0.112258
1770	4.948e-05	3.77407e-05	2.51604e-05	0.164933
1771	1.96053e-05	1.49539e-05	9.96924e-06	0.0653511
1772	1.31029e-05	9.9942e-06	6.6628e-06	0.0436764
1773	2.66253e-05	2.03084e-05	1.35389e-05	0.0887512
1774	5.58518e-05	4.26007e-05	2.84005e-05	0.186173
1775	4.70886e-05	3.59166e-05	2.39444e-05	0.156962
1776	3.64499e-05	2.78019e-05	1.85346e-05	0.1215
1777	3.01797e-05	2.30194e-05	1.53463e-05	0.100599
1778	1.81495e-05	1.38435e-05	9.22897e-06	0.0604984
1779	6.20986e-05	4.73654e-05	3.1577e-05	0.206995
1780	1.78638e-05	1.36255e-05	9.08367e-06	0.0595459
1781	2.83804e-05	2.1647e-05	1.44313e-05	0.0946013
1782	1.93186e-05	1.47352e-05	9.82345e-06	0.0643954
1783	4.82987e-05	3.68396e-05	2.45597e-05	0.160996
1784	3.68515e-05	2.81083e-05	1.87389e-05	0.122838
1785	1.4618e-05	1.11498e-05	7.43322e-06	0.0487268
1786	3.07977e-05	2.34908e-05	1.56605e-05	0.102659
1787	1.58617e-05	1.20984e-05	8.0656e-06	0.0528722
1788	1.66646e-05	1.27109e-05	8.47391e-06	0.0555488
1789	3.37217e-05	2.57211e-05	1.71474e-05	0.112406
1790	3.25202e-05	2.48046e-05	1.65364e-05	0.108401
1791	2.30427e-05	1.75757e-05	1.17171e-05	0.0768089
1792	7.34142e-05	5.59963e-05	3.73309e-05	0.244714
1793	1.79719e-05	1.3708e-05	9.13864e-06	0.0599063
1794	3.84543e-05	2.93309e-05	1.95539e-05	0.128181
1795	2.23771e-05	1.7068e-05	1.13787e-05	0.0745902
1796	2.9413e-05	2.24347e-05	1.49564e-05	0.0980435
1797	2.27069e-05	1.73196e-05	1.15464e-05	0.0756896
1798	2.94979e-05	2.24994e-05	1.49996e-05	0.0983263
1799	3.12285e-05	2.38194e-05	1.58796e-05	0.104095
1800	3.10917e-05	2.3715e-05	1.581e-05	0.103639
1801	2.87931e-05	2.19618e-05	1.46412e-05	0.095977
1802	4.04065e-05	3.08199e-05	2.05466e-05	0.134688
1803	1.30529e-05	9.95606e-06	6.63737e-06	0.0435098
1804	2.92321e-05	2.22967e-05	1.48644e-05	0.0974404
1805	3.653e-05	2.78631e-05	1.85754e-05	0.121767
1806	4.76589e-05	3.63516e-05	2.42344e-05	0.158863
1807	4.48319e-05	3.41953e-05	2.27969e-05	0.14944
1808	2.38671e-05	1.82045e-05	1.21364e-05	0.0795571
1809	2.29513e-05	1.7506e-05	1.16706e-05	0.0765042
1810	3.39838e-05	2.59209e-05	1.72806e-05	0.113279
1811	5.34191e-05	4.07451e-05	2.71634e-05	0.178064
1812	5.47299e-05	4.1745e-05	2.783e-05	0.182433
1813	6.83494e-05	5.21332e-05	3.47555e-05	0.227831
1814	4.4911e-05	3.42556e-05	2.28371e-05	0.149703
1815	2.98997e-05	2.28059e-05	1.52039e-05	0.0996658
1816	1.07284e-05	8.18301e-06	5.45534e-06	0.0357612
1817	2.34219e-05	1.7865e-05	1.191e-05	0.0780731
1818	1.46561e-05	1.11788e-05	7.45256e-06	0.0488536
1819	2.71882e-05	2.07376e-05	1.38251e-05	0.0906273
1820	2.90867e-05	2.21857e-05	1.47905e-05	0.0969555
1821	4.99231e-05	3.80786e-05	2.53858e-05	0.16641
1822	1.48681e-05	1.13405e-05	7.56036e-06	0.0495602
1823	6.15124e-05	4.69183e-05	3.12789e-05	0.205041
1824	1.17738e-05	8.98044e-06	5.98696e-06	0.0392462
1825	3.98068e-05	3.03624e-05	2.02416e-05	0.132689
1826	0.00013123	0.000100095	6.673e-05	0.437433
1827	3.52431e-05	2.68815e-05	1.7921e-05	0.117477
1828	4.28977e-05	3.272e-05	2.18133e-05	0.142992
1829	2.34751e-05	1.79055e-05	1.1937e-05	0.0782503
1830	2.24348e-05	1.71121e-05	1.1408e-05	0.0747828
1831	4.34607e-05	3.31495e-05	2.20996e-05	0.144869
1832	5.01771e-05	3.82723e-05	2.55149e-05	0.167257
1833	2.42342e-05	1.84845e-05	1.2323e-05	0.0807806
1834	3.12801e-05	2.38587e-05	1.59058e-05	0.104267
1835	3.49443e-05	2.66536e-05	1.77691e-05	0.116481
1836	6.35447e-05	4.84684e-05	3.23123e-05	0.211816
1837	5.75452e-05	4.38923e-05	2.92616e-05	0.191817
1838	2.41713e-05	1.84365e-05	1.2291e-05	0.080571
1839	3.06056e-05	2.33443e-05	1.55628e-05	0.102019
1840	5.92188e-05	4.51689e-05	3.01126e-05	0.197396
1841	3.2504e-05	2.47923e-05	1.65282e-05	0.108347
1842	3.31817e-05	2.53092e-05	1.68728e-05	0.110606
1843	2.44416e-05	1.86427e-05	1.24285e-05	0.0814721
1844	3.48863e-05	2.66093e-05	1.77396e-05	0.116288
1845	4.41002e-05	3.36372e-05	2.24248e-05	0.147001
1846	2.10182e-05	1.60315e-05	1.06877e-05	0.0700606
1847	1.78266e-05	1.35971e-05	9.06476e-06	0.059422
1848	1.3932e-05	1.06266e-05	7.08438e-06	0.04644
1849	2.72991e-05	2.08223e-05	1.38815e-05	0.0909972
1850	4.60576e-05	3.51302e-05	2.34201e-05	0.153525
1851	3.01796e-05	2.30194e-05	1.53463e-05	0.100599
1852	1.9754e-05	1.50673e-05	1.00449e-05	0.0658468
1853	3.01137e-05	2.29691e-05	1.53127e-05	0.100379
1854	5.29186e-05	4.03634e-05	2.6909e-05	0.176395
1855	4.70062e-05	3.58538e-05	2.39025e-05	0.156687
1856	4.05953e-05	3.09639e-05	2.06426e-05	0.135318
1857	2.4965e-05	1.90419e-05	1.26946e-05	0.0832166
1858	2.93498e-05	2.23864e-05	1.49243e-05	0.0978327
1859	4.294e-05	3.27523e-05	2.18348e-05	0.143133
1860	3.09533e-05	2.36095e-05	1.57397e-05	0.103178
1861	7.27687e-05	5.55039e-05	3.70026e-05	0.242562
1862	3.84142e-05	2.93002e-05	1.95335e-05	0.128047
1863	2.40774e-05	1.83649e-05	1.22433e-05	0.080258
1864	4.59527e-05	3.50502e-05	2.33668e-05	0.153176
1865	4.87925e-05	3.72163e-05	2.48109e-05	0.162642
1866	2.99347e-05	2.28325e-05	1.52217e-05	0.0997823
1867	2.50631e-05	1.91168e-05	1.27445e-05	0.0835438
1868	3.40906e-05	2.60024e-05	1.73349e-05	0.113635
1869	2.53137e-05	1.93079e-05	1.28719e-05	0.084379
1870	1.70331e-05	1.29919e-05	8.66128e-06	0.056777
1871	2.25663e-05	1.72123e-05	1.14749e-05	0.0752209
1872	6.48313e-05	4.94497e-05	3.29665e-05	0.216104
1873	3.85799e-05	2.94266e-05	1.96177e-05	0.1286
1874	5.45555e-05	4.1612e-05	2.77413e-05	0.181852
1875	2.20958e-05	1.68535e-05	1.12357e-05	0.0736527
1876	3.63233e-05	2.77054e-05	1.84703e-05	0.121078
1877	3.51713e-05	2.68267e-05	1.78845e-05	0.117238
1878	2.35263e-05	1.79446e-05	1.19631e-05	0.0784211
1879	4.90141e-05	3.73853e-05	2.49235e-05	0.16338
1880	4.55378e-05	3.47337e-05	2.31558e-05	0.151793
1881	2.39808e-05	1.82912e-05	1.21941e-05	0.0799359
1882	1.87356e-05	1.42905e-05	9.52697e-06	0.0624518
1883	4.56061e-05	3.47858e-05	2.31906e-05	0.15202
1884	3.4088e-05	2.60004e-05	1.73336e-05	0.113627
1885	4.90724e-05	3.74297e-05	2.49531e-05	0.163575
1886	5.3374e-05	4.07107e-05	2.71405e-05	0.177913
1887	3.09809e-05	2.36305e-05	1.57537e-05	0.10327
1888	2.41557e-05	1.84246e-05	1.22831e-05	0.0805189
1889	1.43802e-05	1.09684e-05	7.31229e-06	0.047934
1890	1.39407e-05	1.06332e-05	7.08882e-06	0.0464691
1891	1.49564e-05	1.14079e-05	7.60526e-06	0.0498545
1892	2.13337e-05	1.62722e-05	1.08481e-05	0.0711124
1893	4.61344e-05	3.51888e-05	2.34592e-05	0.153781
1894	3.8609e-05	2.94488e-05	1.96326e-05	0.128697
1895	6.38968e-05	4.8737e-05	3.24913e-05	0.212989
1896	3.44302e-05	2.62615e-05	1.75076e-05	0.114767
1897	3.73989e-05	2.85258e-05	1.90172e-05	0.124663
1898	2.64287e-05	2.01584e-05	1.34389e-05	0.0880958
1899	3.93546e-05	3.00175e-05	2.00117e-05	0.131182
1900	1.77899e-05	1.35692e-05	9.04611e-06	0.0592997
1901	4.03616e-05	3.07856e-05	2.05237e-05	0.134539
1902	1.02652e-05	7.82972e-06	5.21981e-06	0.0342173
1903	2.68483e-05	2.04784e-05	1.36523e-05	0.0894944
1904	1.48027e-05	1.12907e-05	7.52713e-06	0.0493424
1905	2.96837e-05	2.26411e-05	1.50941e-05	0.0989457
1906	3.09457e-05	2.36037e-05	1.57358e-05	0.103152
1907	2.34472e-05	1.78842e-05	1.19228e-05	0.0781574
1908	1.71913e-05	1.31125e-05	8.7417e-06	0.0573042
1909	1.59168e-05	1.21404e-05	8.09363e-06	0.0530559
1910	2.89403e-05	2.20741e-05	1.47161e-05	0.0964677
1911	5.58461e-05	4.25963e-05	2.83976e-05	0.186154
1912	2.57143e-05	1.96134e-05	1.30756e-05	0.0857143
1913	1.97923e-05	1.50965e-05	1.00643e-05	0.0659744
1914	2.69292e-05	2.05401e-05	1.36934e-05	0.0897638
1915	3.64851e-05	2.78288e-05	1.85525e-05	0.121617
1916	4.40465e-05	3.35963e-05	2.23975e-05	0.146822
1917	2.05923e-05	1.57067e-05	1.04711e-05	0.068641
1918	1.90149e-05	1.45035e-05	9.66903e-06	0.0633831
1919	1.74002e-05	1.32719e-05	8.84794e-06	0.0580006
1920	3.87472e-05	2.95543e-05	1.97028e-05	0.129157
1921	3.02916e-05	2.31048e-05	1.54032e-05	0.100972
1922	1.79848e-05	1.37178e-05	9.14522e-06	0.0599494
1923	5.83973e-05	4.45423e-05	2.96948e-05	0.194658
1924	2.10346e-05	1.6044e-05	1.0696e-05	0.0701153
1925	1.6538e-05	1.26143e-05	8.40951e-06	0.0551266
1926	4.43382e-05	3.38187e-05	2.25458e-05	0.147794
1927	6.75391e-05	5.15151e-05	3.43434e-05	0.22513
1928	3.64829e-05	2.78271e-05	1.85514e-05	0.12161
1929	2.45241e-05	1.87056e-05	1.24704e-05	0.081747
1930	1.75851e-05	1.34129e-05	8.94196e-06	0.058617
1931	1.54117e-05	1.17552e-05	7.83678e-06	0.0513722
1932	2.42009e-05	1.84591e-05	1.23061e-05	0.0806697
1933	7.81627e-06	5.96182e-06	3.97455e-06	0.0260542
1934	9.47332e-06	7.22573e-06	4.81715e-06	0.0315777
1935	8.12903e-05	6.20038e-05	4.13359e-05	0.270968
1936	2.21529e-05	1.6897e-05	1.12647e-05	0.0738431
1937	4.48645e-05	3.42202e-05	2.28135e-05	0.149548
1938	3.38348e-05	2.58073e-05	1.72049e-05	0.112783
1939	3.25103e-05	2.47971e-05	1.65314e-05	0.108368
1940	2.76005e-05	2.10522e-05	1.40348e-05	0.0920018
1941	2.78361e-05	2.12319e-05	1.41546e-05	0.0927871
1942	1.90344e-05	1.45184e-05	9.67893e-06	0.063448
1943	7.59775e-05	5.79515e-05	3.86343e-05	0.253258
1944	2.50417e-05	1.91004e-05	1.27336e-05	0.0834724
1945	2.56132e-05	1.95364e-05	1.30242e-05	0.0853774
1946	4.36996e-05	3.33317e-05	2.22211e-05	0.145665
1947	3.04363e-05	2.32151e-05	1.54767e-05	0.101454
1948	1.80307e-05	1.37528e-05	9.16853e-06	0.0601022
1949	2.84557e-05	2.17044e-05	1.44696e-05	0.0948522
1950	3.32899e-05	2.53917e-05	1.69278e-05	0.110966
1951	1.41278e-05	1.07759e-05	7.18393e-06	0.0470926
1952	4.04337e-05	3.08406e-05	2.05604e-05	0.134779
1953	0.000102686	7.83233e-05	5.22155e-05	0.342287
1954	0.00014128	0.000107761	7.18407e-05	0.470935
1955	3.93816e-05	3.00381e-05	2.00254e-05	0.131272
1956	3.34253e-05	2.5495e-05	1.69967e-05	0.111418
1957	2.54461e-05	1.94089e-05	1.29393e-05	0.0848204
1958	3.14901e-05	2.40189e-05	1.60126e-05	0.104967
1959	2.57279e-05	1.96238e-05	1.30826e-05	0.0857598
1960	3.46937e-05	2.64624e-05	1.76416e-05	0.115646
1961	6.45106e-05	4.92052e-05	3.28034e-05	0.215035
1962	1.6562e-05	1.26326e-05	8.42172e-06	0.0552067
1963	4.98575e-05	3.80286e-05	2.53524e-05	0.166192
1964	4.09885e-05	3.12638e-05	2.08425e-05	0.136628
1965	4.22191e-05	3.22024e-05	2.14683e-05	0.14073
1966	6.50358e-06	4.96058e-06	3.30705e-06	0.0216786
1967	4.0305e-05	3.07424e-05	2.04949e-05	0.13435
1968	4.13465e-05	3.15369e-05	2.10246e-05	0.137822
1969	6.45408e-05	4.92281e-05	3.28188e-05	0.215136
1970	3.10665e-05	2.36958e-05	1.57972e-05	0.103555
1971	1.94428e-05	1.48299e-05	9.88659e-06	0.0648093
1972	4.34561e-05	3.31459e-05	2.20973e-05	0.144854
1973	0.000143054	0.000109114	7.27427e-05	0.476848
1974	3.93268e-05	2.99964e-05	1.99976e-05	0.131089
1975	2.76694e-05	2.11047e-05	1.40698e-05	0.0922313
1976	1.1552e-05	8.8112e-06	5.87413e-06	0.0385065
1977	2.39127e-05	1.82393e-05	1.21596e-05	0.0797091
1978	1.47249e-05	1.12313e-05	7.48755e-06	0.0490829
1979	2.96792e-05	2.26377e-05	1.50918e-05	0.0989307
1980	2.3971e-05	1.82838e-05	1.21892e-05	0.0799035
1981	6.4415e-05	4.91322e-05	3.27548e-05	0.214717
1982	2.26992e-05	1.73137e-05	1.15425e-05	0.0756641
1983	5.1494e-05	3.92768e-05	2.61845e-05	0.171647
1984	1.98932e-05	1.51734e-05	1.01156e-05	0.0663107
1985	1.29643e-05	9.88849e-06	6.59232e-06	0.0432145
1986	2.3264e-05	1.77445e-05	1.18297e-05	0.0775466
1987	4.72802e-05	3.60627e-05	2.40418e-05	0.157601
1988	2.85446e-05	2.17722e-05	1.45148e-05	0.0951486
1989	2.99907e-05	2.28753e-05	1.52502e-05	0.0999691
1990	2.42967e-05	1.85322e-05	1.23548e-05	0.0809889
1991	2.40618e-05	1.8353e-05	1.22353e-05	0.0802059
1992	3.95571e-05	3.0172e-05	2.01147e-05	0.131857
1993	4.10536e-05	3.13135e-05	2.08756e-05	0.136845
1994	4.06493e-05	3.1005e-05	2.067e-05	0.135498
1995	7.62496e-05	5.8159e-05	3.87727e-05	0.254165
1996	5.00934e-05	3.82085e-05	2.54723e-05	0.166978
1997	3.36437e-05	2.56616e-05	1.71077e-05	0.112146
1998	2.93592e-05	2.23936e-05	1.4929e-05	0.0978638
1999	1.34069e-05	1.02261e-05	6.81739e-06	0.0446898
[truncated: 8,001 more rows]
