# Supplementary material for: Health risk assessment from habitants of Araró, Michoacán, México, exposed to arsenic by dust, using Monte Carlo probabilistic method
Source: PeerJ. 2025 Jun 10;13:e18805. doi: 10.7717/peerj.18805 (PMC12164815; doi:10.7717/peerj.18805)
Supplement: Supplemental Information 7 [file peerj-13-18805-s007.xlsx]

## Sheet: Risk Premises
Study Title:	Ingestión premisas simulación.					Last simulation run:
Study File:	Ingestión premisas simulación.xlsx					2022-11-04 19:34:33
	Output Cells	Histogram settings				Multi-cell output range names
Description for Reports	Range Names	Min value	Max value	Step size		title row or column (optional)
	ADD	Auto	Auto	Auto
	ADDc	Auto	Auto	Auto
	CR	Auto	Auto	Auto
	HQ	Auto	Auto	Auto
		Study	Min				Max
	Input Cells	File	Allowed		Expected		Allowed
Description for Reports	Range Names	Values	Values	10/90	Values	90/10	Values	Distributions	Parameters and chart settings
	BW	60.9	25.9	41.0454	61.621	82.2958	158.4	Normal	Mean	60.9	std dev	16.5625	X Axis Min	auto	X Axis Max	auto
	Cs	15.6	5.94	10.1171	15.7996	21.5085	42.53	Normal	Mean	15.6	std dev	4.57375	X Axis Min	auto	X Axis Max	auto
	ED	15.88	13	14.9189	15.8801	16.8415	19	Normal	Mean	15.88	std dev	0.75	X Axis Min	auto	X Axis Max	auto
	IR	30	4	15.5031	30.4649	45.488	100	Normal	Mean	30	std dev	12	X Axis Min	auto	X Axis Max	auto

## Sheet: Simulation Summary
	10000	Simulations run
					Change in expected values as simulations increase									Change in standard deviation as simulations increase
	Minimum result	Maximum result	Expected value	Std deviation	125	250	500	1000	2000	4000	8000	10000		125	250	500	1000	2000	4000	8000	10000
ADD	4.80923e-07	5.05465e-05	8.34488e-06	4.84903e-06	-	-0.0229507	0.00672666	0.0168277	0.0321504	-0.000486084	0.0033012	-0.00158673		-	-0.0452777	0.0267116	0.0493711	0.0593639	-0.0151204	0.00240687	-0.00571765
ADDc	1.09101e-07	1.14668e-05	1.8931e-06	1.10004e-06	-	-0.0229507	0.00672666	0.0168277	0.0321504	-0.000486084	0.0033012	-0.00158673		-	-0.0452777	0.0267116	0.0493711	0.0593639	-0.0151204	0.00240687	-0.00571765
CR	7.27339e-08	7.64456e-06	1.26206e-06	7.33358e-07	-	-0.0229507	0.00672666	0.0168277	0.0321504	-0.000486084	0.0033012	-0.00158673		-	-0.0452777	0.0267116	0.0493711	0.0593639	-0.0151204	0.00240687	-0.00571765
HQ	0.00160308	0.168488	0.0278163	0.0161634	-	-0.0229507	0.00672666	0.0168277	0.0321504	-0.000486084	0.0033012	-0.00158673		-	-0.0452777	0.0267116	0.0493711	0.0593639	-0.0151204	0.00240687	-0.00571765

## Sheet: Simulation variance
This worksheet shows the convergence of the output variables as a function of the number of simulations
You should run enough simulations until the % change is very small, typically < 1.0%
ADD
	# of Sims	125	250	500	1000	2000	4000	8000	10000
	Avg Value	8.07367e-06	7.88838e-06	7.94144e-06	8.07508e-06	8.33469e-06	8.33064e-06	8.35814e-06	8.34488e-06
	% Chg		-0.0229507	0.00672666	0.0168277	0.0321504	-0.000486084	0.0033012	-0.00158673
	Std Dev.	4.53334e-06	4.32808e-06	4.44369e-06	4.66308e-06	4.9399e-06	4.8652e-06	4.87691e-06	4.84903e-06
	% Chg		-0.0452777	0.0267116	0.0493711	0.0593639	-0.0151204	0.00240687	-0.00571765
ADDc
	# of Sims	125	250	500	1000	2000	4000	8000	10000
	Avg Value	1.83157e-06	1.78953e-06	1.80157e-06	1.83189e-06	1.89078e-06	1.88987e-06	1.8961e-06	1.8931e-06
	% Chg		-0.0229507	0.00672666	0.0168277	0.0321504	-0.000486084	0.0033012	-0.00158673
	Std Dev.	1.02842e-06	9.81856e-07	1.00808e-06	1.05785e-06	1.12065e-06	1.10371e-06	1.10636e-06	1.10004e-06
	% Chg		-0.0452777	0.0267116	0.0493711	0.0593639	-0.0151204	0.00240687	-0.00571765
CR
	# of Sims	125	250	500	1000	2000	4000	8000	10000
	Avg Value	1.22105e-06	1.19302e-06	1.20105e-06	1.22126e-06	1.26052e-06	1.25991e-06	1.26407e-06	1.26206e-06
	% Chg		-0.0229507	0.00672666	0.0168277	0.0321504	-0.000486084	0.0033012	-0.00158673
	Std Dev.	6.85613e-07	6.5457e-07	6.72055e-07	7.05235e-07	7.47101e-07	7.35804e-07	7.37575e-07	7.33358e-07
	% Chg		-0.0452777	0.0267116	0.0493711	0.0593639	-0.0151204	0.00240687	-0.00571765
HQ
	# of Sims	125	250	500	1000	2000	4000	8000	10000
	Avg Value	0.0269122	0.0262946	0.0264715	0.0269169	0.0277823	0.0277688	0.0278605	0.0278163
	% Chg		-0.0229507	0.00672666	0.0168277	0.0321504	-0.000486084	0.0033012	-0.00158673
	Std Dev.	0.0151111	0.0144269	0.0148123	0.0155436	0.0164663	0.0162173	0.0162564	0.0161634
	% Chg		-0.0452777	0.0267116	0.0493711	0.0593639	-0.0151204	0.00240687	-0.00571765

## Sheet: ADD Results
ADD Results
Minimum result	4.80923e-07				7.68473e-06	Study value
Maximum result	5.05465e-05				0.5267	of results are equal or lower
Expected value	8.34488e-06				0.4733	of results are equal or greater
Std Deviation	4.84903e-06
Out of 10000 simulations		Of those with numeric values:
10000 had numeric values.			5% <=	2.42494e-06
0 had error values.			10% <=	3.21026e-06
			15% <=	3.84507e-06
			20% <=	4.38396e-06
			25% <=	4.91323e-06
			30% <=	5.42523e-06
			35% <=	5.90998e-06
			40% <=	6.41572e-06
			45% <=	6.89882e-06
			50% <=	7.39419e-06
			55% <=	7.94661e-06
			60% <=	8.48927e-06
			65% <=	9.09804e-06
			70% <=	9.81032e-06
			75% <=	1.06347e-05
			80% <=	1.16334e-05
			85% <=	1.29384e-05
			90% <=	1.46602e-05
			95% <=	1.76866e-05
			100% <=	5.05465e-05
If ADD is:				7.68473e-06	0.5267	of results are equal or lower
(Chg to do what ifs)					0.4733	of results are greater
					Cumulative				Cumulative
ADD	frequency:				frequency:				frequency:
<=4.80923E-07	1	0.0001		<=4.80923E-07	1	0.0001		=>4.80923E-07	10000	1
4.80923E-07 to 3.11595E-06	922	0.0922		<=3.11595E-06	923	0.0923		=>3.11595E-06	9077	0.9077
3.11595E-06 to 5.75099E-06	2420	0.242		<=5.75099E-06	3343	0.3343		=>5.75099E-06	6657	0.6657
5.75099E-06 to 8.38602E-06	2558	0.2558		<=8.38602E-06	5901	0.5901		=>8.38602E-06	4099	0.4099
8.38602E-06 to 1.1021E-05	1806	0.1806		<=1.1021E-05	7707	0.7707		=>1.1021E-05	2293	0.2293
1.1021E-05 to 1.36561E-05	1023	0.1023		<=1.36561E-05	8730	0.873		=>1.36561E-05	1270	0.127
1.36561E-05 to 1.62911E-05	584	0.0584		<=1.62911E-05	9314	0.9314		=>1.62911E-05	686	0.0686
1.62911E-05 to 1.89261E-05	313	0.0313		<=1.89261E-05	9627	0.9627		=>1.89261E-05	373	0.0373
1.89261E-05 to 2.15612E-05	170	0.017		<=2.15612E-05	9797	0.9797		=>2.15612E-05	203	0.0203
2.15612E-05 to 2.41962E-05	112	0.0112		<=2.41962E-05	9909	0.9909		=>2.41962E-05	91	0.0091
2.41962E-05 to 2.68312E-05	41	0.0041		<=2.68312E-05	9950	0.995		=>2.68312E-05	50	0.005
2.68312E-05 to 2.94663E-05	26	0.0026		<=2.94663E-05	9976	0.9976		=>2.94663E-05	24	0.0024
2.94663E-05 to 3.21013E-05	9	0.0009		<=3.21013E-05	9985	0.9985		=>3.21013E-05	15	0.0015
3.21013E-05 to 3.47363E-05	6	0.0006		<=3.47363E-05	9991	0.9991		=>3.47363E-05	9	0.0009
3.47363E-05 to 3.73714E-05	4	0.0004		<=3.73714E-05	9995	0.9995		=>3.73714E-05	5	0.0005
3.73714E-05 to 4.00064E-05	1	0.0001		<=4.00064E-05	9996	0.9996		=>4.00064E-05	4	0.0004
4.00064E-05 to 4.26414E-05	2	0.0002		<=4.26414E-05	9998	0.9998		=>4.26414E-05	2	0.0002
4.26414E-05 to 4.52765E-05	1	0.0001		<=4.52765E-05	9999	0.9999		=>4.52765E-05	1	0.0001
4.52765E-05 to 4.79115E-05	0	0		<=4.79115E-05	9999	0.9999		=>4.79115E-05	1	0.0001
4.79115E-05 to 5.05465E-05	1	0.0001		<=5.05465E-05	10000	1		=>5.05465E-05	1	0.0001
>5.05465E-05	0	0
Bin Size	2.63503e-06
Number of bins	21
# of Sims	Avg Value	% Chg		Std Dev.	% Chg
125	8.07367e-06			4.53334e-06
250	7.88838e-06	-0.0229507		4.32808e-06	-0.0452777
500	7.94144e-06	0.00672666		4.44369e-06	0.0267116
1000	8.07508e-06	0.0168277		4.66308e-06	0.0493711
2000	8.33469e-06	0.0321504		4.9399e-06	0.0593639
4000	8.33064e-06	-0.000486084		4.8652e-06	-0.0151204
8000	8.35814e-06	0.0033012		4.87691e-06	0.00240687
10000	8.34488e-06	-0.00158673		4.84903e-06	-0.00571765

## Sheet: ADDc Results
ADDc Results
Minimum result	1.09101e-07				1.74334e-06	Study value
Maximum result	1.14668e-05				0.5267	of results are equal or lower
Expected value	1.8931e-06				0.4733	of results are equal or greater
Std Deviation	1.10004e-06
Out of 10000 simulations		Of those with numeric values:
10000 had numeric values.			5% <=	5.50115e-07
0 had error values.			10% <=	7.2827e-07
			15% <=	8.72281e-07
			20% <=	9.94533e-07
			25% <=	1.1146e-06
			30% <=	1.23075e-06
			35% <=	1.34072e-06
			40% <=	1.45545e-06
			45% <=	1.56505e-06
			50% <=	1.67742e-06
			55% <=	1.80275e-06
			60% <=	1.92585e-06
			65% <=	2.06396e-06
			70% <=	2.22554e-06
			75% <=	2.41256e-06
			80% <=	2.63911e-06
			85% <=	2.93516e-06
			90% <=	3.32577e-06
			95% <=	4.01234e-06
			100% <=	1.14668e-05
If ADDc is:				1.74334e-06	0.5267	of results are equal or lower
(Chg to do what ifs)					0.4733	of results are greater
					Cumulative				Cumulative
ADDc	frequency:				frequency:				frequency:
<=1.09101E-07	1	0.0001		<=1.09101E-07	1	0.0001		=>1.09101E-07	10000	1
1.09101E-07 to 7.06877E-07	922	0.0922		<=7.06877E-07	923	0.0923		=>7.06877E-07	9077	0.9077
7.06877E-07 to 1.30465E-06	2420	0.242		<=1.30465E-06	3343	0.3343		=>1.30465E-06	6657	0.6657
1.30465E-06 to 1.90243E-06	2558	0.2558		<=1.90243E-06	5901	0.5901		=>1.90243E-06	4099	0.4099
1.90243E-06 to 2.5002E-06	1806	0.1806		<=2.5002E-06	7707	0.7707		=>2.5002E-06	2293	0.2293
2.5002E-06 to 3.09798E-06	1023	0.1023		<=3.09798E-06	8730	0.873		=>3.09798E-06	1270	0.127
3.09798E-06 to 3.69575E-06	584	0.0584		<=3.69575E-06	9314	0.9314		=>3.69575E-06	686	0.0686
3.69575E-06 to 4.29353E-06	313	0.0313		<=4.29353E-06	9627	0.9627		=>4.29353E-06	373	0.0373
4.29353E-06 to 4.89131E-06	170	0.017		<=4.89131E-06	9797	0.9797		=>4.89131E-06	203	0.0203
4.89131E-06 to 5.48908E-06	112	0.0112		<=5.48908E-06	9909	0.9909		=>5.48908E-06	91	0.0091
5.48908E-06 to 6.08686E-06	41	0.0041		<=6.08686E-06	9950	0.995		=>6.08686E-06	50	0.005
6.08686E-06 to 6.68463E-06	26	0.0026		<=6.68463E-06	9976	0.9976		=>6.68463E-06	24	0.0024
6.68463E-06 to 7.28241E-06	9	0.0009		<=7.28241E-06	9985	0.9985		=>7.28241E-06	15	0.0015
7.28241E-06 to 7.88018E-06	6	0.0006		<=7.88018E-06	9991	0.9991		=>7.88018E-06	9	0.0009
7.88018E-06 to 8.47796E-06	4	0.0004		<=8.47796E-06	9995	0.9995		=>8.47796E-06	5	0.0005
8.47796E-06 to 9.07574E-06	1	0.0001		<=9.07574E-06	9996	0.9996		=>9.07574E-06	4	0.0004
9.07574E-06 to 9.67351E-06	2	0.0002		<=9.67351E-06	9998	0.9998		=>9.67351E-06	2	0.0002
9.67351E-06 to 1.02713E-05	1	0.0001		<=1.02713E-05	9999	0.9999		=>1.02713E-05	1	0.0001
1.02713E-05 to 1.08691E-05	0	0		<=1.08691E-05	9999	0.9999		=>1.08691E-05	1	0.0001
1.08691E-05 to 1.14668E-05	1	0.0001		<=1.14668E-05	10000	1		=>1.14668E-05	1	0.0001
>1.14668E-05	0	0
Bin Size	5.97776e-07
Number of bins	21
# of Sims	Avg Value	% Chg		Std Dev.	% Chg
125	1.83157e-06			1.02842e-06
250	1.78953e-06	-0.0229507		9.81856e-07	-0.0452777
500	1.80157e-06	0.00672666		1.00808e-06	0.0267116
1000	1.83189e-06	0.0168277		1.05785e-06	0.0493711
2000	1.89078e-06	0.0321504		1.12065e-06	0.0593639
4000	1.88987e-06	-0.000486084		1.10371e-06	-0.0151204
8000	1.8961e-06	0.0033012		1.10636e-06	0.00240687
10000	1.8931e-06	-0.00158673		1.10004e-06	-0.00571765

## Sheet: CR Results
CR Results
Minimum result	7.27339e-08				1.16222e-06	Study value
Maximum result	7.64456e-06				0.5267	of results are equal or lower
Expected value	1.26206e-06				0.4733	of results are equal or greater
Std Deviation	7.33358e-07
Out of 10000 simulations		Of those with numeric values:
10000 had numeric values.			5% <=	3.66744e-07
0 had error values.			10% <=	4.85513e-07
			15% <=	5.81521e-07
			20% <=	6.63022e-07
			25% <=	7.43068e-07
			30% <=	8.20501e-07
			35% <=	8.93814e-07
			40% <=	9.70302e-07
			45% <=	1.04336e-06
			50% <=	1.11828e-06
			55% <=	1.20183e-06
			60% <=	1.2839e-06
			65% <=	1.37597e-06
			70% <=	1.48369e-06
			75% <=	1.60837e-06
			80% <=	1.75941e-06
			85% <=	1.95677e-06
			90% <=	2.21718e-06
			95% <=	2.67489e-06
			100% <=	7.64456e-06
If CR is:				1.16222e-06	0.5267	of results are equal or lower
(Chg to do what ifs)					0.4733	of results are greater
					Cumulative				Cumulative
CR	frequency:				frequency:				frequency:
<=7.27339E-08	1	0.0001		<=7.27339E-08	1	0.0001		=>7.27339E-08	10000	1
7.27339E-08 to 4.71251E-07	922	0.0922		<=4.71251E-07	923	0.0923		=>4.71251E-07	9077	0.9077
4.71251E-07 to 8.69768E-07	2420	0.242		<=8.69768E-07	3343	0.3343		=>8.69768E-07	6657	0.6657
8.69768E-07 to 1.26829E-06	2558	0.2558		<=1.26829E-06	5901	0.5901		=>1.26829E-06	4099	0.4099
1.26829E-06 to 1.6668E-06	1806	0.1806		<=1.6668E-06	7707	0.7707		=>1.6668E-06	2293	0.2293
1.6668E-06 to 2.06532E-06	1023	0.1023		<=2.06532E-06	8730	0.873		=>2.06532E-06	1270	0.127
2.06532E-06 to 2.46384E-06	584	0.0584		<=2.46384E-06	9314	0.9314		=>2.46384E-06	686	0.0686
2.46384E-06 to 2.86235E-06	313	0.0313		<=2.86235E-06	9627	0.9627		=>2.86235E-06	373	0.0373
2.86235E-06 to 3.26087E-06	170	0.017		<=3.26087E-06	9797	0.9797		=>3.26087E-06	203	0.0203
3.26087E-06 to 3.65939E-06	112	0.0112		<=3.65939E-06	9909	0.9909		=>3.65939E-06	91	0.0091
3.65939E-06 to 4.0579E-06	41	0.0041		<=4.0579E-06	9950	0.995		=>4.0579E-06	50	0.005
4.0579E-06 to 4.45642E-06	26	0.0026		<=4.45642E-06	9976	0.9976		=>4.45642E-06	24	0.0024
4.45642E-06 to 4.85494E-06	9	0.0009		<=4.85494E-06	9985	0.9985		=>4.85494E-06	15	0.0015
4.85494E-06 to 5.25346E-06	6	0.0006		<=5.25346E-06	9991	0.9991		=>5.25346E-06	9	0.0009
5.25346E-06 to 5.65197E-06	4	0.0004		<=5.65197E-06	9995	0.9995		=>5.65197E-06	5	0.0005
5.65197E-06 to 6.05049E-06	1	0.0001		<=6.05049E-06	9996	0.9996		=>6.05049E-06	4	0.0004
6.05049E-06 to 6.44901E-06	2	0.0002		<=6.44901E-06	9998	0.9998		=>6.44901E-06	2	0.0002
6.44901E-06 to 6.84752E-06	1	0.0001		<=6.84752E-06	9999	0.9999		=>6.84752E-06	1	0.0001
6.84752E-06 to 7.24604E-06	0	0		<=7.24604E-06	9999	0.9999		=>7.24604E-06	1	0.0001
7.24604E-06 to 7.64456E-06	1	0.0001		<=7.64456E-06	10000	1		=>7.64456E-06	1	0.0001
>7.64456E-06	0	0
Bin Size	3.98517e-07
Number of bins	21
# of Sims	Avg Value	% Chg		Std Dev.	% Chg
125	1.22105e-06			6.85613e-07
250	1.19302e-06	-0.0229507		6.5457e-07	-0.0452777
500	1.20105e-06	0.00672666		6.72055e-07	0.0267116
1000	1.22126e-06	0.0168277		7.05235e-07	0.0493711
2000	1.26052e-06	0.0321504		7.47101e-07	0.0593639
4000	1.25991e-06	-0.000486084		7.35804e-07	-0.0151204
8000	1.26407e-06	0.0033012		7.37575e-07	0.00240687
10000	1.26206e-06	-0.00158673		7.33358e-07	-0.00571765

## Sheet: HQ Results
HQ Results
Minimum result	0.00160308				0.0256158	Study value
Maximum result	0.168488				0.5267	of results are equal or lower
Expected value	0.0278163				0.4733	of results are equal or greater
Std Deviation	0.0161634
Out of 10000 simulations		Of those with numeric values:
10000 had numeric values.			5% <=	0.00808314
0 had error values.			10% <=	0.0107009
			15% <=	0.0128169
			20% <=	0.0146132
			25% <=	0.0163774
			30% <=	0.0180841
			35% <=	0.0196999
			40% <=	0.0213857
			45% <=	0.0229961
			50% <=	0.0246473
			55% <=	0.0264887
			60% <=	0.0282976
			65% <=	0.0303268
			70% <=	0.0327011
			75% <=	0.035449
			80% <=	0.0387778
			85% <=	0.0431279
			90% <=	0.0488673
			95% <=	0.0589554
			100% <=	0.168488
If HQ is:				0.0256158	0.5267	of results are equal or lower
(Chg to do what ifs)					0.4733	of results are greater
					Cumulative				Cumulative
HQ	frequency:				frequency:				frequency:
<=0.001603078	1	0.0001		<=0.001603078	1	0.0001		=>0.001603078	10000	1
0.001603078 to 0.010386515	922	0.0922		<=0.010386515	923	0.0923		=>0.010386515	9077	0.9077
0.010386515 to 0.019169952	2420	0.242		<=0.019169952	3343	0.3343		=>0.019169952	6657	0.6657
0.019169952 to 0.027953389	2558	0.2558		<=0.027953389	5901	0.5901		=>0.027953389	4099	0.4099
0.027953389 to 0.036736827	1806	0.1806		<=0.036736827	7707	0.7707		=>0.036736827	2293	0.2293
0.036736827 to 0.045520264	1023	0.1023		<=0.045520264	8730	0.873		=>0.045520264	1270	0.127
0.045520264 to 0.054303701	584	0.0584		<=0.054303701	9314	0.9314		=>0.054303701	686	0.0686
0.054303701 to 0.063087138	313	0.0313		<=0.063087138	9627	0.9627		=>0.063087138	373	0.0373
0.063087138 to 0.071870575	170	0.017		<=0.071870575	9797	0.9797		=>0.071870575	203	0.0203
0.071870575 to 0.080654012	112	0.0112		<=0.080654012	9909	0.9909		=>0.080654012	91	0.0091
0.080654012 to 0.089437449	41	0.0041		<=0.089437449	9950	0.995		=>0.089437449	50	0.005
0.089437449 to 0.098220887	26	0.0026		<=0.098220887	9976	0.9976		=>0.098220887	24	0.0024
0.098220887 to 0.107004324	9	0.0009		<=0.107004324	9985	0.9985		=>0.107004324	15	0.0015
0.107004324 to 0.115787761	6	0.0006		<=0.115787761	9991	0.9991		=>0.115787761	9	0.0009
0.115787761 to 0.124571198	4	0.0004		<=0.124571198	9995	0.9995		=>0.124571198	5	0.0005
0.124571198 to 0.133354635	1	0.0001		<=0.133354635	9996	0.9996		=>0.133354635	4	0.0004
0.133354635 to 0.142138072	2	0.0002		<=0.142138072	9998	0.9998		=>0.142138072	2	0.0002
0.142138072 to 0.150921509	1	0.0001		<=0.150921509	9999	0.9999		=>0.150921509	1	0.0001
0.150921509 to 0.159704947	0	0		<=0.159704947	9999	0.9999		=>0.159704947	1	0.0001
0.159704947 to 0.168488384	1	0.0001		<=0.168488384	10000	1		=>0.168488384	1	0.0001
>0.168488384	0	0
Bin Size	0.00878344
Number of bins	21
# of Sims	Avg Value	% Chg		Std Dev.	% Chg
125	0.0269122			0.0151111
250	0.0262946	-0.0229507		0.0144269	-0.0452777
500	0.0264715	0.00672666		0.0148123	0.0267116
1000	0.0269169	0.0168277		0.0155436	0.0493711
2000	0.0277823	0.0321504		0.0164663	0.0593639
4000	0.0277688	-0.000486084		0.0162173	-0.0151204
8000	0.0278605	0.0033012		0.0162564	0.00240687
10000	0.0278163	-0.00158673		0.0161634	-0.00571765

## Sheet: Simulation Input Values 1
Sim #	BW	Cs	ED	IR
1	64.1107	17.2181	14.9552	18.5743
2	49.8766	10.6753	15.3965	59.3348
3	47.6677	12.2921	15.5122	13.3834
4	58.7877	12.5051	15.5723	7.2406
5	72.825	9.64908	16.2145	35.1102
6	47.8856	21.8025	17.2035	41.8429
7	76.4022	22.9906	15.9179	27.7085
8	62.0703	18.0641	16.8271	32.8158
9	55.7725	13.6762	16.2775	24.4767
10	51.2297	17.8514	15.1591	23.6039
11	43.4643	9.15707	15.4307	26.7198
12	79.3597	10.7503	16.1553	42.1948
13	37.8621	7.00559	16.1644	14.4538
14	73.5512	20.0874	16.5097	18.9196
15	45.7587	22.9919	16.4167	34.7835
16	81.8446	16.8039	16.1125	41.9544
17	52.4319	18.5244	15.6783	21.6225
18	46.434	8.0654	16.5061	22.6035
19	67.1397	13.5838	15.4161	18.9845
20	47.1761	7.80427	15.3	23.3513
21	48.5012	11.0475	16.0035	27.7213
22	63.2285	12.1034	15.8436	33.6829
23	56.421	17.7982	15.7269	13.0404
24	58.7204	15.4284	15.6478	25.9878
25	53.2549	20.8689	15.7205	44.2387
26	44.2055	15.5873	15.7161	31.0194
27	61.6375	18.2494	14.8965	36.8729
28	62.5264	11.6849	15.4638	30.1225
29	52.8117	18.2308	15.784	14.8665
30	62.0995	12.8536	15.7153	31.797
31	55.2942	14.3139	15.7367	36.5016
32	66.7575	17.9535	15.6787	26.0366
33	45.1683	18.9502	15.7271	41.3076
34	59.1304	11.6255	15.9663	29.9499
35	62.5765	21.5429	16.4748	46.1154
36	44.091	18.7762	15.6587	45.0034
37	41.4541	13.9519	15.5503	9.078
38	94.1518	10.8285	15.0281	26.9934
39	80.682	18.2285	16.537	28.2759
40	72.066	14.3783	15.2495	21.9544
41	66.5085	8.95535	15.7585	55.3963
42	55.6065	13.0234	16.331	32.0718
43	60.7227	16.0455	15.6374	35.1753
44	53.7426	21.0037	14.5152	43.3483
45	58.0159	18.5657	15.3496	17.1392
46	45.9609	10.9884	15.9771	37.1247
47	53.3733	16.8311	15.2369	11.7345
48	71.333	13.5605	15.7235	29.6333
49	58.6858	15.5569	15.3885	19.4438
50	86.3303	15.4382	15.1049	18.323
51	51.353	21.1421	16.8094	25.4916
52	70.9114	19.0089	16.5901	6.68347
53	61.7606	11.8977	15.5161	27.8143
54	99.1839	7.01613	15.7228	35.2195
55	79.4043	20.2499	16.7264	43.057
56	80.0039	13.3087	15.4319	30.5452
57	62.7872	17.1454	15.9801	19.1681
58	52.3026	13.9141	16.1712	24.7258
59	74.225	13.954	15.8671	29.9577
60	58.8342	10.4033	15.205	35.8418
61	54.6421	12.7915	15.8093	58.6513
62	50.6976	12.9357	15.6973	29.9621
63	63.3359	14.1265	15.7369	52.7423
64	68.3048	12.2318	15.8889	6.48022
65	79.9524	19.1321	16.1436	31.067
66	79.4291	15.3237	16.4382	36.8841
67	76.1394	14.147	14.64	20.1957
68	66.5531	13.7256	15.234	44.981
69	58.9184	15.533	15.1221	61.6374
70	58.2909	21.9718	17.9037	26.555
71	73.5063	16.8954	14.5023	18.9178
72	88.5146	17.8747	15.3231	31.2654
73	50.022	20.2072	16.6042	39.8714
74	63.1334	7.09422	15.4227	37.0218
75	52.3939	14.9714	15.4571	17.7283
76	76.0676	18.0669	15.5509	40.1348
77	74.1837	13.399	15.2563	24.6026
78	30.5494	14.0392	17.0639	35.4517
79	62.2023	15.4876	17.2826	34.7081
80	68.5762	8.51618	15.827	38.1919
81	75.1682	17.3455	14.6543	21.3588
82	87.111	18.32	16.0885	28.7135
83	77.2559	16.8695	15.8645	28.3546
84	48.0438	17.7765	16.7455	37.3289
85	52.6828	19.996	15.7148	27.4871
86	65.0719	10.9528	14.9941	30.7271
87	78.323	21.9062	15.9065	31.5502
88	55.9484	18.6498	14.249	24.1529
89	63.2243	9.81162	16.0185	32.0688
90	89.8394	16.387	16.0367	28.6766
91	73.3317	22.966	15.35	25.7278
92	68.6657	16.8983	15.562	9.91988
93	88.1661	8.76221	15.7362	35.1683
94	69.088	13.2769	16.051	39.0537
95	74.5579	23.069	14.475	32.901
96	44.2439	17.2289	16.7597	31.1383
97	40.7579	17.747	15.4618	51.076
98	43.3673	22.3078	16.3939	19.3933
99	77.664	22.4002	16.2578	39.1726
100	40.042	13.4565	15.435	7.71921
101	64.0994	15.0009	15.8863	38.7221
102	55.6986	13.0015	15.9354	24.5873
103	30.6774	16.228	15.3651	42.3769
104	69.404	10.3603	14.9541	39.3764
105	64.3407	17.4172	15.2825	34.6441
106	68.9159	15.2795	16.1198	11.9637
107	70.9364	18.3799	17.196	25.6908
108	73.7314	11.8744	15.4754	33.582
109	77.0608	19.6409	15.7472	33.7556
110	77.2135	28.9915	15.9527	31.1658
111	65.6486	13.8958	16.2176	38.8847
112	50.0717	17.4368	15.533	27.5783
113	73.4645	22.8673	15.1647	57.3475
114	94.7396	20.4419	15.0042	24.7274
115	65.8828	11.7321	15.9936	42.6498
116	73.4815	19.2184	16.7167	54.3186
117	61.3671	15.6537	15.2164	41.6429
118	71.8183	17.3985	15.7741	20.55
119	56.9053	15.7411	16.0725	39.5283
120	75.5824	11.3849	15.2115	30.9473
121	53.4505	17.2179	14.6478	28.7871
122	48.7858	9.70535	15.6602	31.7475
123	80.5606	16.3437	17.5832	59.6128
124	38.4313	17.5673	16.4634	32.0176
125	72.4215	18.5301	16.0175	27.4718
126	74.1732	10.8515	14.7897	52.6874
127	47.6279	20.8662	15.1432	17.5756
128	64.0034	13.6111	15.7047	41.1141
129	64.546	15.047	16.5726	30.159
130	80.9997	13.4235	16.5168	20.4781
131	75.8301	11.4712	15.8717	30.1974
132	36.2075	13.0413	16.6668	35.314
133	41.0017	19.0808	16.384	17.2787
134	59.1226	18.137	15.5174	33.0308
135	81.2064	12.7728	15.5373	38.9716
136	46.9822	20.1344	15.9575	4.60152
137	62.2108	9.70977	15.3805	34.9853
138	61.4824	17.4681	15.4923	32.2734
139	76.7522	19.1605	17.2122	38.3934
140	33.398	9.21214	15.7985	25.2329
141	53.1833	14.54	15.4738	33.9159
142	54.1184	27.2816	16.632	24.1648
143	62.8404	20.19	15.1251	9.67432
144	63.8355	14.0105	14.7285	18.3839
145	87.3341	12.8696	15.8341	37.5962
146	34.424	18.4443	17.5591	39.933
147	54.1444	18.3693	16.2508	44.2538
148	72.3038	18.3056	15.3799	39.9439
149	59.0145	16.143	15.3843	33.5455
150	73.076	15.9859	16.4058	51.689
151	56.3459	21.7491	15.0743	30.7211
152	77.3024	14.9431	15.1693	40.1633
153	43.8183	13.4863	15.5652	17.3256
154	77.7939	13.2895	15.7371	16.0425
155	40.9293	13.7729	15.8298	24.1273
156	35.0331	11.9816	18.0813	32.5783
157	87.6918	17.7605	15.792	45.3801
158	47.6842	15.6582	15.6409	20.3069
159	52.701	14.2237	15.8508	46.2819
160	54.8256	6.66264	15.792	31.7229
161	26.9951	15.5347	16.9275	39.8365
162	67.7753	18.9774	16.3847	32.3959
163	70.6647	16.5738	15.9958	33.9244
164	55.4583	15.5876	15.8476	15.7813
165	56.2409	12.2551	15.1661	34.3267
166	52.8014	12.3452	14.8031	27.1677
167	76.2209	15.9958	17.175	36.2016
168	56.1597	19.1268	16.1755	32.0764
169	43.8418	16.7903	14.8642	40.2818
170	37.2881	11.4138	15.9637	15.7878
171	53.7847	8.64969	15.1877	33.3012
172	86.7067	12.6878	16.4616	28.7899
173	67.4986	16.319	16.5092	45.2036
174	41.002	10.0967	16.0654	26.6231
175	48.5844	12.5982	17.3567	14.5907
176	75.7803	16.6512	17.0008	32.8003
177	60.7684	13.4442	16.2389	39.4144
178	77.1022	19.6343	16.9678	17.3379
179	71.0321	14.9215	15.5999	18.0241
180	33.3115	17.4915	15.7364	4.48204
181	61.9455	13.5679	15.6321	32.3052
182	82.2027	13.0637	15.8283	31.9134
183	52.6711	11.7833	16.0096	6.56889
184	84.4695	16.9401	16.5731	8.10615
185	77.2014	13.1836	16.3583	34.2467
186	48.0728	19.7765	15.7421	12.1084
187	69.1703	14.0913	15.0059	19.3189
188	93.3477	20.3387	17.0684	19.683
189	73.7727	11.5238	16.9124	32.5237
190	88.4228	22.0293	15.3295	24.8989
191	77.8569	6.95034	16.43	26.3735
192	99.4086	20.4196	15.4873	50.3171
193	46.8865	12.9609	15.4304	30.2451
194	55.0144	16.4907	15.4679	71.564
195	61.3024	15.7346	16.0648	56.6897
196	79.5798	14.4505	15.2622	39.7897
197	59.4847	19.875	15.9719	18.1722
198	56.9467	10.0284	16.113	26.7716
199	65.3552	8.95868	15.484	47.5619
200	63.3497	19.4045	16.1287	35.4543
201	54.3627	16.739	17.4834	32.8109
202	82.9315	12.098	15.7599	30.4245
203	63.1958	13.1654	15.7148	21.043
204	71.345	7.61611	16.0258	40.2513
205	34.0675	11.874	17.3276	18.6462
206	61.9975	13.1774	15.7203	49.9992
207	40.84	10.4531	15.9357	29.0342
208	85.4871	17.2907	15.6597	51.4533
209	61.5735	22.2606	16.2099	49.9155
210	50.5528	19.1708	14.5692	23.1239
211	46.5269	15.4409	16.3362	12.4138
212	61.7384	17.7246	16.7433	36.5319
213	66.7204	15.6721	14.9439	16.1926
214	52.282	13.9643	15.5297	13.9684
215	72.902	24.1341	14.9706	15.1723
216	73.622	25.2512	15.1431	48.1078
217	65.9688	18.6788	15.3458	41.4493
218	76.0159	18.6046	16.3341	19.4671
219	61.0665	17.3075	15.7057	21.7647
220	51.8131	17.5341	15.8048	5.46771
221	57.9478	10.232	16.3453	30.8297
222	46.0255	12.8594	15.3958	21.0871
223	60.3316	14.4737	14.4001	37.5321
224	75.7489	10.3574	17.3797	38.4361
225	54.2311	25.8663	15.4855	24.3851
226	53.5218	12.9714	16.9296	19.7017
227	71.953	10.557	15.437	33.8219
228	46.76	19.888	15.5775	22.3969
229	27.9671	14.0957	16.7626	26.4242
230	70.6618	13.851	17.2036	24.6561
231	63.9651	25.8026	16.3485	20.6199
232	62.3177	15.262	15.7616	45.1318
233	55.7866	16.0632	16.203	17.1509
234	38.6796	13.3525	16.7971	15.5988
235	60.8386	13.8798	15.276	11.5859
236	45.4281	14.2987	15.4244	32.1133
237	39.6486	12.8461	15.697	21.7639
238	59.1257	13.1315	15.5043	44.0067
239	73.2974	23.6866	16.3111	35.3751
240	64.0056	12.5539	14.0346	31.9337
241	79.6349	18.0364	16.7848	29.613
242	68.1519	20.4449	14.546	28.6963
243	71.464	23.8902	14.0846	45.0117
244	66.1904	23.2346	15.5911	20.2197
245	84.3838	16.8287	14.1382	33.5483
246	73.6294	7.31465	17.313	21.2467
247	68.3025	14.1301	15.0892	26.6222
248	57.5431	18.4628	15.8976	20.5248
249	58.5581	14.5404	15.8765	28.9663
250	51.7477	13.49	16.1616	33.0815
251	56.3746	18.5282	15.8378	15.5245
252	38.3277	11.936	16.1591	14.9964
253	80.2028	19.2275	15.5353	15.7424
254	89.3714	15.0864	16.6444	20.1839
255	90.6981	20.5598	16.072	22.8487
256	49.5937	11.1876	16.1674	46.56
257	67.955	18.0914	16.8561	39.4131
258	57.6561	16.8286	17.0682	36.4292
259	74.2856	14.0092	15.5531	40.2182
260	89.0202	18.4903	16.7081	29.9867
261	48.1408	10.2986	15.7014	6.14388
262	59.3095	11.9331	17.1605	18.9495
263	76.6099	20.6256	17.5841	25.7015
264	69.5027	12.6866	14.3865	40.9636
265	80.2575	13.1235	15.7984	19.0386
266	35.3887	11.7097	16.1474	20.082
267	61.9747	15.0128	15.2584	40.3342
268	38.6724	21.5905	16.1542	24.3059
269	52.9372	11.6239	15.0628	51.0962
270	54.4949	17.2084	16.6492	35.7197
271	70.3676	11.4823	15.9132	59.5498
272	37.0362	15.5219	16.2414	28.6765
273	32.0161	19.1576	15.903	17.3908
274	69.7022	20.2462	15.7373	25.4188
275	61.4644	14.2815	15.0199	30.6462
276	58.0667	16.6905	16.7017	29.3013
277	52.7581	24.1944	17.0762	42.8667
278	62.6286	14.5229	15.8837	41.4989
279	86.4743	15.8112	15.896	8.73423
280	80.938	11.9959	14.6	40.2376
281	70.9373	15.9974	16.5384	32.5281
282	56.7885	18.2288	16.8246	35.382
283	54.0346	16.0197	16.4977	17.8937
284	65.0619	20.8855	16.2062	15.3538
285	50.3454	16.2664	16.6976	11.4113
286	36.3139	14.6855	16.2168	35.5563
287	52.8203	17.338	15.6188	37.7114
288	94.6995	13.7876	15.743	24.5998
289	42.7703	14.104	14.9402	22.9428
290	64.1308	14.5817	15.1028	45.2079
291	69.9273	13.33	16.6389	45.4604
292	68.9935	17.2947	15.4051	33.812
293	76.379	16.2709	16.4917	29.2282
294	47.6917	20.0599	16.8109	34.0249
295	65.9514	12.2062	14.9794	34.0987
296	32.1439	14.0455	15.7511	10.1569
297	88.0577	14.7786	15.0607	30.2938
298	38.2054	18.2354	15.749	26.9137
299	55.0806	13.2656	16.1929	54.1949
300	34.5418	11.4124	15.7353	39.3402
301	66.2783	18.9387	13.9713	22.0577
302	75.2348	17.8876	14.9029	34.3305
303	83.9207	19.3364	16.3565	16.5385
304	59.1329	14.3654	15.9284	21.7465
305	84.6093	19.6527	14.7562	29.4142
306	81.5453	10.4575	16.2287	19.6685
307	54.5749	11.8829	15.5796	38.185
308	50.5531	23.0953	16.9047	46.3657
309	57.605	19.7414	15.9937	29.2303
310	60.5313	16.7694	15.8415	17.9353
311	55.4179	14.7857	16.6445	38.1908
312	72.1217	7.5197	14.2409	30.2453
313	88.3417	13.0254	17.331	38.9009
314	101.925	22.0059	14.6363	43.9056
315	85.5824	16.5865	16.6749	23.4152
316	58.0513	9.81148	15.8848	32.9193
317	93.1323	7.84446	15.1187	9.65627
318	43.8844	11.5366	17.1167	21.6433
319	34.4584	12.3107	16.4583	12.9652
320	76.9232	13.2562	16.1041	35.8763
321	80.6616	18.8749	16.1936	31.2218
322	65.7727	22.9452	15.3161	38.5091
323	59.5572	9.76597	16.7498	36.6034
324	45.1992	16.7012	16.5885	40.4646
325	50.6953	14.0321	16.0259	33.8088
326	80.0697	17.0636	16.5148	19.5654
327	69.6705	19.68	15.8678	32.8685
328	52.6377	19.4688	15.6009	39.6728
329	66.5725	13.7366	15.7578	36.0007
330	72.1122	19.0845	14.3955	29.83
331	80.8991	25.8619	16.4839	22.0556
332	68.9649	16.7366	15.1705	36.7925
333	71.1913	14.7841	14.3674	26.521
334	52.4574	11.7644	15.8638	43.7532
335	56.7202	15.435	15.1803	28.7042
336	105.892	21.7814	15.8834	46.3669
337	63.7891	16.9521	15.6349	33.1156
338	78.4866	23.039	14.6568	39.6199
339	79.7683	14.6907	15.5103	20.8582
340	45.7334	21.9589	16.557	52.5838
341	56.5826	10.684	16.4356	29.5632
342	91.9005	13.453	16.516	49.1661
343	45.8793	11.0071	14.9463	41.0645
344	57.889	7.69953	16.6238	36.8338
345	70.5794	15.5133	16.3931	27.8723
346	59.3251	20.657	14.8744	23.7052
347	59.1483	13.3089	16.3222	38.966
348	45.865	23.6248	15.9601	21.2106
349	51.8898	14.5377	14.9378	13.0913
350	56.7248	14.2913	15.9059	11.4246
351	37.4688	18.4888	16.0089	42.1793
352	42.5309	16.7398	15.0989	42.5145
353	41.3677	20.8993	16.6904	24.6993
354	39.7565	22.5484	16.9377	35.7655
355	68.3329	16.2306	15.4967	11.1925
356	48.3539	10.4919	15.0385	17.8759
357	58.9108	10.5822	15.4972	24.5205
358	42.2199	19.6339	15.7067	43.9903
359	41.4952	10.3927	16.631	35.7071
360	67.0782	25.7846	15.279	54.1658
361	74.6222	17.6787	17.3391	28.7288
362	52.3735	16.3434	15.5398	32.9997
363	62.9771	8.75752	15.5695	21.4218
364	77.2543	20.1322	15.6174	26.9284
365	82.6431	12.2487	16.175	26.1896
366	69.03	28.0625	15.415	10.6224
367	54.0586	12.336	15.2703	29.7488
368	60.6645	16.9272	16.5344	38.1394
369	73.8746	19.3583	15.6441	52.8033
370	65.1298	11.0245	14.8463	36.2458
371	41.3748	18.7128	14.9516	28.9534
372	63.1896	15.4611	14.3457	33.5608
373	68.8313	16.7718	15.7477	26.6482
374	65.4135	13.846	16.7318	21.6054
375	72.9814	24.4303	17.1055	27.8126
376	47.6372	21.1158	16.32	41.3273
377	40.7037	10.6652	15.588	6.69122
378	61.9156	10.3141	17.4058	34.3213
379	57.2344	15.771	16.8048	45.2747
380	82.6753	15.4227	16.7762	28.9593
381	76.0158	10.865	16.9201	30.7213
382	57.4874	12.921	13.8127	14.7031
383	58.147	12.3731	15.5811	34.5319
384	53.5495	11.8962	16.3418	43.1172
385	75.5449	16.9887	15.1684	39.1975
386	65.3358	20.6839	16.4881	13.2105
387	59.2678	12.6928	17.2982	36.0616
388	57.6285	12.3007	16.3511	33.0892
389	54.1827	19.2194	15.6821	48.0348
390	67.3922	11.5525	15.7701	23.2438
391	55.4738	22.9096	16.2268	23.9247
392	55.6863	26.116	16.1068	30.4131
393	83.6956	10.6089	15.0218	26.4698
394	55.6415	19.3458	15.491	35.4685
395	51.9972	21.4871	16.124	34.1176
396	43.4868	13.8987	16.2335	23.1819
397	57.2767	10.8076	16.4467	41.9778
398	60.2408	24.1797	15.795	33.3897
399	102.261	12.2078	15.996	44.4967
400	66.5281	11.1649	15.7598	28.6249
401	65.1572	15.5366	13.3266	25.8668
402	52.7088	13.1014	14.8327	49.4846
403	53.913	10.7212	17.7069	12.6896
404	66.1512	15.8858	15.613	35.5396
405	86.635	15.0567	15.2612	30.4491
406	63.9634	14.0573	15.4021	19.2006
407	51.8665	12.9266	16.0099	26.6457
408	62.8359	10.9384	15.4583	28.7704
409	83.8504	16.259	16.4658	15.0429
410	76.2925	16.104	17.1433	28.4614
411	59.8831	19.4241	16.5373	22.7885
412	37.0757	6.72532	15.4793	31.5803
413	50.8146	16.6795	15.6483	20.147
414	78.9479	14.6514	15.6196	15.986
415	71.9785	9.99626	15.8509	27.5163
416	42.712	14.0084	16.3212	51.194
417	99.9375	16.7105	16.7896	16.4731
418	71.5263	20.1024	17.1128	41.4654
419	48.3385	20.8612	16.0957	38.6142
420	82.6122	17.2391	15.0852	48.6458
421	52.8685	20.3465	15.792	28.3333
422	72.412	21.4773	15.7246	28.63
423	50.5716	15.1982	15.8838	40.442
424	64.1155	14.4072	17.6868	37.3104
425	81.359	15.2667	17.2594	28.9171
426	88.9277	18.3389	15.01	29.6553
427	67.4577	16.2855	14.799	30.6128
428	43.5606	16.3055	16.7304	53.2939
429	61.1091	16.5802	16.4172	35.0439
430	64.988	9.15052	15.2873	38.2329
431	49.118	17.5668	15.1737	52.267
432	64.0085	24.1475	16.0362	8.61632
433	70.8342	17.8616	15.1003	27.0763
434	68.4889	22.5844	15.6079	18.7898
435	57.4077	19.5325	16.3595	24.632
436	53.624	11.7962	15.6483	17.9463
437	77.2837	22.3331	16.2561	56.8855
438	51.7205	14.8287	14.9841	14.504
439	49.4677	23.7571	14.3885	16.9049
440	39.1149	18.8906	16.5744	26.3124
441	69.5539	11.8749	17.237	39.4488
442	49.1984	16.3786	15.2217	28.309
443	61.1428	13.0247	16.3446	52.4247
444	70.8207	15.5142	16.4371	16.63
445	66.9944	18.8711	15.058	38.4199
446	78.0612	10.6777	15.3977	43.1638
447	54.8332	14.4646	15.6499	9.98259
448	57.9136	16.3829	17.6602	16.6948
449	67.5811	17.6575	15.9808	11.3017
450	51.8088	19.1617	15.766	4.72119
451	75.9487	12.5146	15.0737	42.2163
452	73.9919	12.4322	16.3194	35.211
453	80.6306	15.6757	15.9106	39.4809
454	50.8389	14.0766	14.8827	40.7949
455	44.349	6.3972	15.7724	13.6017
456	66.3168	6.66652	15.7837	22.6572
457	70.4433	9.11796	16.0236	23.1196
458	71.9504	7.16965	16.5957	27.5337
459	81.9769	11.0474	17.1982	37.7558
460	31.6971	17.5519	16.9008	37.2088
461	75.125	15.0807	15.9422	17.6179
462	84.8926	10.8629	15.9129	21.369
463	75.2291	13.8918	16.1089	8.02809
464	54.5023	11.1934	14.9283	12.3057
465	31.6826	23.2501	15.7638	21.3902
466	50.4788	13.8499	15.4148	47.5525
467	82.3813	16.1444	16.0635	28.0759
468	43.1813	19.2348	15.3839	32.6686
469	63.5892	10.63	16.0564	34.2134
470	59.6408	15.761	15.7733	27.1282
471	59.0871	22.3533	15.5221	35.3416
472	49.681	6.71117	16.6813	40.7405
473	73.479	19.939	15.9692	36.3227
474	60.841	18.9525	16.1862	41.3444
475	97.9066	22.8686	15.7964	36.7443
476	72.1691	17.2356	16.169	31.0602
477	53.0877	9.44618	14.9289	6.4886
478	63.3284	15.5131	16.4488	33.2077
479	50.4867	12.9404	17.0421	39.3537
480	95.9169	17.1374	16.1101	39.466
481	38.2883	12.3236	15.5056	28.717
482	40.2144	13.404	16.8809	26.9115
483	52.6138	20.9947	17.07	25.4455
484	61.8866	12.5966	14.0393	42.3788
485	48.294	20.1105	15.8188	14.3219
486	77.9447	10.1464	15.7306	15.7249
487	56.179	22.588	16.8177	17.3334
488	47.3646	13.1748	15.4027	16.1794
489	70.0119	10.43	15.4594	37.8184
490	28.2361	22.1965	16.9415	5.9251
491	81.1563	15.2237	15.0532	15.5479
492	67.9991	12.2436	16.5391	28.033
493	83.7399	9.59467	16.1298	61.7807
494	57.4582	13.0051	15.3055	55.1074
495	57.9851	16.6166	15.9618	32.3544
496	47.5345	19.3844	15.9326	10.0682
497	73.4594	14.613	17.3164	11.8538
498	84.8185	16.9241	16.2271	23.2
499	60.9234	14.821	16.6357	18.9955
500	82.2723	12.2158	16.2745	15.2583
501	78.4056	14.3211	15.7104	34.8691
502	57.8555	12.8613	15.2511	20.0277
503	51.8304	14.7499	16.4025	38.1554
504	49.4626	6.28378	16.7011	52.4056
505	63.8769	13.1094	16.3393	10.3635
506	80.4261	23.1161	15.3832	21.7475
507	49.4896	12.6224	15.643	60.0602
508	82.8791	19.467	15.6973	19.2537
509	72.5795	12.0265	15.8599	18.8298
510	52.003	13.6556	15.2689	10.6554
511	75.7869	16.3769	15.6601	17.6815
512	80.2551	16.1667	15.181	40.9717
513	30.0001	14.3559	15.7501	34.0552
514	26.0158	9.28841	16.1819	24.1395
515	44.3886	13.9579	17.3392	18.6451
516	56.4057	15.2961	15.7646	33.3557
517	76.8284	10.8095	16.2639	22.0652
518	82.7704	10.8976	15.3644	18.1773
519	72.3896	10.5182	17.2226	22.8598
520	79.3603	17.8917	16.6872	16.1274
521	91.4712	18.1347	14.9101	39.0517
522	44.6145	22.4039	15.4054	9.02689
523	53.618	19.2438	16.7377	47.5947
524	72.4783	15.315	15.0924	25.297
525	31.0201	13.0461	14.2943	11.0221
526	46.7208	11.622	15.6908	43.6543
527	40.0577	17.4063	16.293	15.8199
528	39.579	18.2388	16.1061	24.7903
529	80.6765	13.6952	14.8378	20.4952
530	68.0273	23.279	16.0667	41.6658
531	63.0158	13.3893	16.325	13.4624
532	45.5098	16.3478	16.6271	26.2777
533	65.5123	16.3839	15.1707	33.3449
534	60.2583	15.4245	14.6346	25.4519
535	56.3967	16.7803	15.7303	24.1593
536	61.942	14.5646	16.127	8.51468
537	63.4419	22.4835	15.7201	42.8044
538	75.4524	13.2747	15.2276	14.7351
539	65.2187	16.7324	15.9839	31.3379
540	85.3718	21.438	14.6521	15.1739
541	53.8582	17.2757	15.2258	40.9465
542	34.2255	11.5103	16.3194	27.0685
543	66.5861	10.4492	16.4239	27.7918
544	84.7891	14.701	16.1566	39.2843
545	43.9057	10.4252	16.0885	43.8055
546	43.3256	16.4807	15.3694	22.5532
547	51.9024	14.4369	15.2903	23.7257
548	66.5674	13.323	17.0729	60.0746
549	45.0499	9.90863	16.0532	19.2199
550	58.8704	23.1036	15.3659	46.648
551	57.0158	20.7038	15.6563	13.6103
552	57.5183	15.9311	15.993	24.5009
553	67.307	12.5678	15.6467	17.1561
554	66.2161	12.9621	16.2301	24.5823
555	34.8367	13.0469	13.9373	32.072
556	84.8096	10.8033	15.4692	25.908
557	75.0346	23.0719	16.6029	17.9864
558	58.3073	12.7311	15.8297	36.8371
559	64.1166	17.5529	14.7745	39.4018
560	33.3015	15.3774	15.2244	52.7591
561	38.1179	19.805	14.7637	44.9177
562	82.7562	20.1586	16.5194	31.789
563	62.8536	12.5511	16.5591	4.11717
564	85.391	9.6217	15.9893	21.3132
565	47.0313	18.674	15.7835	22.1509
566	52.2891	11.74	14.8962	32.4075
567	74.8202	16.2198	16.3499	40.1096
568	91.5311	19.5909	17.0684	30.142
569	40.6252	20.5886	16.0452	27.2337
570	43.1903	19.1794	14.4012	38.0556
571	57.4379	13.5038	15.9931	47.0795
572	75.1128	17.8146	15.0975	26.3087
573	26.633	16.0494	15.5843	38.483
574	46.8882	12.9763	15.9127	23.3717
575	71.1292	16.3463	15.447	27.5151
576	53.855	7.79605	15.3097	36.4876
577	56.0448	14.5436	16.6278	52.7001
578	60.4849	17.2502	16.3852	35.4873
579	53.3767	15.969	15.0652	32.1561
580	69.7969	15.0167	15.8227	32.4742
581	83.497	13.8351	15.7521	49.8111
582	51.5251	7.97617	15.0936	33.9624
583	29.4957	18.393	16.1062	46.6846
584	52.5244	18.2404	15.7618	25.5379
585	63.5476	15.5016	16.3509	42.9648
586	40.1701	22.9184	15.6618	16.0396
587	84.8657	21.7358	15.8043	21.6254
588	74.0361	21.9352	16.9742	33.769
589	62.6023	11.9504	16.0932	15.2223
590	70.4816	6.60365	15.6716	26.2655
591	54.4326	9.12946	16.1705	32.4517
592	31.47	13.988	17.6651	21.2962
593	52.3615	10.6957	15.1831	25.6325
594	43.3587	12.1804	15.5666	43.4301
595	80.1246	15.4686	15.747	20.6486
596	47.3126	17.001	16.9817	23.1915
597	63.2749	11.0207	16.4894	30.5051
598	67.4429	18.6109	16.1765	24.2847
599	54.3023	17.2877	15.4534	35.9051
600	68.893	15.6871	15.4686	16.1512
601	50.2302	14.335	14.7799	37.9346
602	72.8403	6.05883	14.2185	36.1515
603	76.9873	13.1837	17.1466	39.2014
604	41.4593	9.48146	16.7608	25.3373
605	65.8835	12.0492	16.7541	28.6442
606	49.5768	18.5385	15.5765	21.0539
607	68.4849	15.1015	15.7416	30.669
608	56.9322	17.8085	16.3731	40.3844
609	38.6568	12.8031	15.541	23.8697
610	41.5087	20.3389	16.5605	26.5187
611	58.9791	14.1027	17.0481	20.1275
612	68.884	20.5156	15.2116	32.8923
613	55.8801	14.7343	16.452	20.1143
614	67.5191	16.0653	16.7048	44.8597
615	109.444	16.1497	17.4733	25.7904
616	54.702	14.7577	16.4008	11.5819
617	58.781	19.6354	16.6444	24.2557
618	55.4028	12.5566	15.1273	36.9812
619	56.3587	18.5274	15.473	39.2657
620	34.7055	15.0988	15.3856	40.3492
621	60.9513	19.5834	15.6808	10.0306
622	30.7686	17.7196	16.1175	13.9728
623	91.3132	23.0741	16.6906	29.7545
624	69.0148	12.7059	16.3466	35.3778
625	102.859	7.82516	15.9522	11.4504
626	68.1035	18.8106	15.7656	29.3518
627	52.4499	14.812	16.9376	39.4124
628	56.3501	14.613	15.8642	38.5406
629	66.6372	14.4356	16.146	22.4761
630	62.5959	17.8012	14.4579	33.2005
631	49.1138	17.8808	17.228	19.4824
632	63.5252	18.35	14.8324	27.5629
633	55.9119	13.3212	16.5693	18.6316
634	81.9791	8.80994	15.7736	42.3884
635	60.1096	18.3715	15.8751	42.2356
636	50.4799	13.2379	15.3603	28.1848
637	48.6868	14.5992	15.0635	24.7398
638	38.7811	15.4249	15.2917	29.0692
639	75.163	11.7612	16.362	16.7928
640	54.3553	11.8635	14.8427	22.5454
641	70.2707	8.65948	16.7501	8.53579
642	47.1671	15.0535	15.6827	35.629
643	83.9806	17.008	15.2559	32.2989
644	62.4708	9.59628	14.5169	32.1381
645	53.7103	17.069	17.0973	31.8133
646	57.8856	14.4147	16.2859	24.2295
647	53.3116	15.3333	15.7309	31.8683
648	67.5187	15.7899	15.7774	23.9596
649	47.715	18.1425	15.8996	27.57
650	47.2608	27.9174	14.9901	28.66
651	73.3986	15.6745	15.1953	37.6375
652	72.8809	12.8453	16.9046	35.7536
653	71.341	11.4571	17.3538	26.5068
654	48.492	11.3134	16.6724	27.9827
655	51.0603	17.9776	15.9101	64.9249
656	46.0004	14.6324	15.4597	17.9808
657	62.1211	10.9423	13.7738	29.3006
658	58.1684	9.9196	15.669	41.4712
659	37.8161	13.0793	16.3006	29.6298
660	60.0014	12.4507	16.1974	28.0849
661	59.7661	26.1278	15.8841	51.457
662	26.669	12.0783	15.7747	29.3732
663	69.3526	19.0076	15.4983	33.0647
664	59.4148	13.361	15.6717	29.2845
665	69.3318	13.215	16.1377	25.8293
666	57.6798	11.5964	17.6884	28.8387
667	79.5809	20.9738	14.8246	55.1665
668	47.4458	14.6422	14.7466	29.5238
669	63.9957	23.242	16.5371	28.4677
670	53.9116	22.8293	15.3872	15.2384
671	65.5815	16.799	14.7764	30.7794
672	28.9476	16.8874	15.9475	46.6593
673	71.5581	8.38769	16.2467	21.4463
674	69.6628	17.4045	16.2894	18.6389
675	45.7634	16.3284	15.6449	29.5889
676	46.6204	21.4534	15.8483	12.4072
677	94.4707	11.3902	18.9044	36.6265
678	71.9492	8.85667	17.4196	10.9319
679	39.6011	9.5475	16.9855	27.0576
680	70.4678	15.6523	15.0639	36.1835
681	53.5987	14.9448	15.3852	40.1794
682	82.2707	13.417	14.9866	4.73617
683	39.5041	14.9622	16.5921	42.118
684	96.2096	23.0412	14.8736	61.3406
685	93.0011	21.2302	16.4383	35.273
686	32.0595	17.6023	16.3795	11.4023
687	44.807	17.4054	17.2758	16.162
688	32.0528	9.11216	16.4975	32.9231
689	28.1624	11.4513	16.0132	22.0895
690	54.1271	16.7681	15.7926	28.1525
691	62.5516	15.5286	16.5431	19.505
692	100.736	23.6276	15.6468	42.1314
693	48.5129	22.0454	16.3822	21.0844
694	76.9625	8.769	16.1816	36.5987
695	30.5996	19.4292	16.3214	55.9269
696	31.4044	16.0993	15.8226	9.87808
697	46.1274	13.7335	16.0544	26.3016
698	54.1273	17.6312	15.8173	27.3051
699	61.9487	15.9228	16.9415	20.8455
700	75.5826	18.7011	15.3738	29.8722
701	59.6203	16.7941	15.8362	36.9128
702	54.3191	16.7258	16.7397	34.1432
703	61.5098	16.4814	16.3325	50.483
704	44.7093	7.61266	15.5868	23.8501
705	71.3717	18.3242	15.5794	27.6013
706	53.1241	14.7559	15.0441	33.6272
707	51.5962	9.41447	16.2829	29.5593
708	46.3959	10.1861	16.154	41.7024
709	81.9308	24.5681	15.6626	46.3859
710	97.002	26.6729	16.3757	42.4685
711	55.7441	15.1154	16.2111	25.7422
712	49.1653	22.7822	15.4037	36.3753
713	40.9295	20.8568	14.5935	43.6883
714	52.9782	14.1506	15.8189	12.1851
715	63.8953	13.588	16.2555	26.4883
716	82.901	18.2398	16.0453	38.8181
717	74.5253	11.636	14.048	20.8835
718	62.3378	21.7052	15.491	22.3433
719	82.5298	16.7496	14.847	33.2498
720	32.6822	21.5693	15.3625	17.4458
721	65.103	23.0955	15.3003	17.1366
722	40.8582	11.3147	15.8856	35.1983
723	67.7459	14.5594	15.7181	24.6433
724	71.8487	11.8609	14.9804	20.0089
725	58.4268	14.5977	16.7321	10.6307
726	73.3834	16.4578	16.4457	26.1835
727	44.2167	15.5895	14.9121	25.7019
728	64.3863	13.5422	15.9675	29.2856
729	40.0716	14.506	16.1361	29.7393
730	60.0373	12.7987	15.5318	41.6454
731	60.2525	14.4914	16.3169	29.5506
732	49.2401	12.6239	14.5906	15.7285
733	74.3673	15.7316	16.5352	29.5882
734	85.6891	16.6888	15.4772	12.4731
735	51.5929	14.9839	15.3569	52.2651
736	66.6573	16.034	16.5242	6.1656
737	60.7235	10.4794	16.3967	21.2161
738	87.5834	19.4525	17.022	26.1546
739	70.0383	11.619	17.2672	45.8899
740	59.9044	7.88482	15.2374	14.9866
741	60.2887	15.1038	16.827	28.5318
742	54.6174	14.3504	16.3416	22.8623
743	43.4488	15.1117	15.7779	34.6188
744	70.4576	21.7489	16.5927	30.6965
745	51.2489	22.3144	16.8897	15.6967
746	48.783	10.3265	15.7254	31.8799
747	49.2739	13.3215	15.8381	39.8276
748	63.7797	15.7263	16.008	35.8398
749	67.2631	12.3591	16.3239	28.5143
750	83.9956	25.746	15.4164	44.7166
751	35.6281	10.0885	15.211	29.5776
752	59.9032	15.8907	15.3892	33.4587
753	53.579	15.7015	16.9663	59.3983
754	50.9581	17.6667	16.2289	21.385
755	51.5852	17.4344	16.9612	18.8273
756	68.8535	8.67496	15.0775	28.2211
757	56.2819	17.922	15.4109	23.2742
758	58.8009	24.1608	15.5502	35.4513
759	74.5912	17.4076	15.6082	32.9132
760	50.5136	19.45	15.8886	34.6921
761	79.0597	23.341	15.7709	44.3798
762	51.2742	16.88	14.0053	42.4805
763	67.5738	21.6873	14.844	50.0931
764	64.9852	16.6847	16.3939	4.27389
765	58.4308	12.0111	16.2263	15.6554
766	73.1935	16.5829	16.3688	34.881
767	46.0836	15.265	17.1	36.4364
768	52.6742	16.283	15.9722	31.5797
769	35.5794	17.4211	15.7774	31.9244
770	45.4141	10.4972	16.5802	21.5595
771	88.0131	17.26	14.6445	31.7039
772	51.3015	8.49651	16.5146	30.9233
773	84.4199	17.943	15.8199	11.3267
774	104.902	18.5437	16.4783	60.4265
775	72.8097	24.3258	16.3537	29.0041
776	66.8597	18.1249	16.2112	29.1104
777	59.2071	18.2366	16.2443	57.249
778	43.5041	14.6299	15.9987	36.1625
779	50.3428	16.8181	16.1541	38.741
780	55.4328	16.3732	15.074	25.8849
781	62.5105	14.6492	16.4477	17.8622
782	54.0981	18.621	16.6286	11.578
783	63.5208	15.6453	15.9563	23.3221
784	44.2133	10.8784	15.9982	32.5214
785	58.4936	7.60041	16.8808	38.1841
786	63.3993	8.53511	17.3246	27.8479
787	45.4458	15.9516	16.7166	13.5932
788	58.0367	13.6165	13.8936	23.8055
789	43.8384	13.3055	16.9289	23.0698
790	51.8806	21.4146	15.5983	33.4148
791	67.2943	7.17463	16.0336	23.2271
792	75.2896	12.8137	17.5093	51.9262
793	54.1685	11.6474	16.7905	29.9409
794	51.1526	7.67761	16.1238	35.5555
795	74.1597	16.8523	16.7915	22.6184
796	43.6326	14.1778	15.4323	22.4472
797	86.6844	22.0316	15.0924	27.1152
798	61.0433	15.906	16.2495	49.084
799	66.8493	9.83481	15.3623	35.0699
800	63.7292	13.3655	16.8166	17.0037
801	41.5495	23.6012	15.4399	22.1547
802	47.3932	17.221	16.2361	53.7002
803	61.1886	16.973	15.6102	25.3257
804	57.9165	25.5674	14.9649	39.3532
805	52.7476	7.34544	14.9802	31.7141
806	80.2115	21.7957	13.8115	32.729
807	86.5286	15.5799	15.2173	28.567
808	54.2481	16.2483	15.7782	34.1149
809	46.1054	10.222	16.3585	11.2831
810	49.9427	10.5138	15.4749	42.581
811	71.4307	13.7409	17.0388	25.5267
812	45.5786	14.8606	16.206	26.5508
813	68.225	14.8557	15.8426	38.8026
814	53.3145	13.665	15.7894	13.1995
815	88.6435	28.4311	14.7601	35.7437
816	32.3294	12.9854	16.5031	55.0872
817	86.9376	15.081	16.9478	48.4223
818	53.3632	19.558	16.1084	41.9474
819	80.8979	16.3111	15.4475	24.3581
820	52.2932	9.79447	16.0896	27.7365
821	82.2066	21.413	14.779	37.9276
822	37.5832	11.6221	17.0977	13.7847
823	55.9583	16.0476	15.669	32.0833
824	73.4718	9.8217	16.3023	39.9336
825	71.8696	15.466	16.9468	24.5509
826	86.6946	19.6861	15.8229	25.687
827	34.8617	7.86776	15.4274	36.5472
828	99.893	16.4031	17.4678	54.7858
829	47.7304	6.66262	15.8725	10.3464
830	57.721	14.2031	16.3222	38.1376
831	58.1967	12.637	16.0693	41.4587
832	52.9001	15.8417	15.6115	17.7837
833	73.4092	9.50266	14.6116	18.1358
834	75.7788	7.27228	15.4251	31.9221
835	65.613	21.0964	15.3689	23.7332
836	67.6283	12.174	14.5363	37.8391
837	44.0052	15.807	14.798	17.3127
838	67.2943	11.2645	17.0184	25.3063
839	86.1249	21.0353	15.5838	37.4383
840	45.7639	11.8596	15.7925	27.668
841	53.2738	14.296	15.5654	37.7337
842	70.2298	14.8672	16.4563	45.6973
843	59.1423	12.8595	17.577	23.4548
844	48.667	13.2342	14.9964	30.116
845	30.3326	20.1094	17.0168	8.99015
846	70.709	10.1952	15.4531	35.1733
847	36.1515	17.4978	15.198	34.7824
848	52.9898	15.884	14.0812	18.5636
849	30.71	19.9625	17.2692	46.4845
850	45.5184	15.8438	16.4816	5.02099
851	57.5193	14.2567	16.2221	18.878
852	71.3237	13.3552	15.9088	9.59663
853	48.382	19.7404	15.5439	43.7623
854	46.4198	19.4997	17.2664	27.2224
855	59.6324	16.4559	14.847	5.1691
856	40.1353	13.4148	14.9157	35.8368
857	63.1522	18.6933	16.2782	27.3026
858	29.8682	17.0257	15.755	27.7516
859	65.4818	12.797	16.0541	45.3278
860	64.9135	13.6796	15.9878	38.1514
861	32.6552	12.1741	15.7561	37.4018
862	61.7282	19.5059	17.0613	37.8959
863	41.2444	13.7938	15.9833	27.9799
864	70.8239	18.7389	16.8031	31.2412
865	102.84	13.9089	15.4786	41.8265
866	75.5451	7.11688	15.048	54.4493
867	68.5026	19.7583	16.7529	35.8008
868	100.455	19.8379	15.4173	31.4886
869	62.6096	15.6048	16.5127	19.8137
870	33.6213	16.169	15.5344	43.7794
871	62.6763	18.7226	16.9214	37.2258
872	53.4372	17.1779	16.5737	33.2119
873	44.2238	25.9729	15.832	38.5925
874	64.836	11.7391	15.9297	40.2194
875	42.8538	19.9142	14.9704	44.3614
876	66.0957	14.8222	15.6201	18.8245
877	78.581	17.4184	15.1823	31.7389
878	61.3944	16.0601	15.3007	32.2636
879	50.4613	10.2517	15.2812	34.3285
880	46.1468	12.4172	15.7462	29.7107
881	56.1513	17.2829	15.8269	44.253
882	82.2574	12.9186	15.4471	31.627
883	76.8215	21.564	15.7056	27.6341
884	71.5046	21.4433	15.9188	8.61997
885	51.357	13.8364	15.1874	23.3094
886	40.5876	14.1145	16.6297	25.4865
887	69.3472	10.683	16.8546	22.027
888	60.1797	14.354	15.9841	24.6393
889	57.4769	13.9713	16.0247	37.5532
890	29.3937	12.8918	16.6153	19.0688
891	50.4469	9.8191	14.1469	49.9514
892	53.4007	8.03837	14.491	31.7565
893	71.6975	13.6778	16.5036	33.8355
894	69.7558	12.0326	14.986	7.98914
895	66.4139	12.3001	16.9315	23.9627
896	71.7613	18.0799	15.396	29.0472
897	68.3278	12.5324	16.7516	14.9376
898	62.6728	16.255	15.8185	11.7142
899	71.0057	8.342	14.5905	25.9184
900	95.334	8.70803	17.2509	57.6579
901	46.06	15.4799	16.6234	19.4212
902	55.8637	18.9903	16.1555	13.4281
903	28.7098	9.64274	15.0369	29.3914
904	61.5051	20.332	15.812	49.793
905	86.6027	13.3691	14.9539	18.2382
906	40.617	17.0129	17.3069	28.7804
907	75.8894	23.9255	16.4931	35.617
908	54.4314	7.86468	16.4785	21.7567
909	49.8886	19.0095	15.9417	29.5557
910	55.0068	12.0981	14.9677	20.3626
911	32.7188	20.1456	15.8867	31.5077
912	71.3301	21.2506	15.3069	5.52943
913	69.1974	11.1947	15.2748	43.03
914	86.0982	24.5545	16.0845	45.2992
915	43.3596	25.4369	16.9408	19.0611
916	80.0879	13.2474	16.2078	12.4888
917	33.7881	15.4549	15.3706	19.4795
918	55.689	18.2719	15.1602	41.0719
919	63.2423	11.8787	16.7476	28.1352
920	71.4887	19.7186	16.6116	28.8191
921	48.2255	23.7654	16.6707	22.8927
922	57.0046	18.813	16.1973	30.152
923	126.536	14.4086	16.3784	30.3382
924	59.4871	19.3724	15.7178	18.733
925	71.1615	15.4182	15.0529	45.3637
926	43.0609	18.6866	14.9712	44.6975
927	67.3607	6.62448	14.9797	34.7497
928	52.0666	15.9008	15.9754	39.1814
929	80.536	10.8355	16.507	48.4657
930	86.7745	16.8123	16.4718	18.4155
931	86.297	19.6732	16.5461	26.0195
932	70.536	16.1066	16.146	13.8552
933	48.2483	13.2596	16.5143	30.6205
934	57.5897	15.3955	15.2483	39.2247
935	62.2588	18.4805	16.9453	27.3832
936	59.759	17.1672	15.535	18.7542
937	63.1534	16.1605	15.5918	6.74532
938	58.5561	19.34	15.0244	27.4686
939	55.1127	19.0619	16.4814	31.3216
940	76.7868	15.5741	15.5902	47.5154
941	71.0222	21.5421	14.8464	16.0774
942	46.8343	16.5929	14.3557	33.2042
943	41.5513	23.3249	16.3834	18.6378
944	57.5931	13.3067	15.1974	34.4407
945	87.2411	11.1677	16.0177	41.068
946	65.3636	20.2667	16.4697	35.7515
947	73.7051	13.0836	16.5069	42.1752
948	86.3796	10.824	15.8539	22.0742
949	62.5825	9.65922	16.1119	17.7435
950	45.6421	14.7625	15.0935	22.8539
951	90.5797	20.7007	16.2538	23.7454
952	44.9575	17.5204	15.5506	31.7816
953	41.1123	21.522	16.0872	55.0051
954	53.3724	9.70954	16.5153	23.9103
955	81.5237	14.7977	15.9344	17.3344
956	71.8712	7.00822	16.087	30.5627
957	31.7523	11.1241	15.7261	36.473
958	80.3901	17.8494	17.1164	9.40449
959	53.0706	12.8077	16.4256	17.8851
960	62.6894	10.9032	16.2828	42.2294
961	47.8157	11.155	16.5919	21.1343
962	32.1453	31.6028	16.1388	16.7542
963	65.3682	18.2109	15.8843	37.5459
964	58.7292	15.7479	15.6838	28.3534
965	56.1	18.5811	16.5802	11.2747
966	39.7846	11.352	14.5251	17.1154
967	90.3679	15.8275	15.8319	35.1969
968	40.1568	11.3882	15.8551	46.4562
969	72.5926	12.8566	15.4205	33.1429
970	76.6769	21.7375	14.8136	23.2055
971	70.4757	17.8205	16.2124	57.1868
972	57.1137	15.2053	14.4101	14.7501
973	74.4607	14.313	15.4382	30.665
974	49.5228	10.7042	17.0281	8.98414
975	59.0879	15.2482	15.552	55.3412
976	61.1297	22.7296	15.5131	14.9023
977	46.5989	23.9663	15.2794	37.2042
978	65.9646	8.63894	14.566	16.3169
979	55.5256	22.7864	15.21	39.5763
980	57.5371	21.4493	15.4189	46.7117
981	42.5963	17.7964	15.6405	29.1353
982	41.1858	8.55266	15.9171	28.6915
983	43.7729	12.4052	15.6567	45.3951
984	91.8682	16.6098	15.2355	18.6986
985	50.8912	16.2869	16.7573	32.0885
986	101.181	22.2913	15.7677	16.6397
987	75.2305	12.0793	16.088	37.6488
988	82.7007	14.7541	16.3374	27.4551
989	88.242	21.4243	17.0043	34.0458
990	75.7735	13.9853	16.1073	32.8754
991	41.0268	10.855	15.7774	39.9334
992	70.4608	24.1268	15.5986	20.9381
993	48.1385	13.7607	16.6038	21.0103
994	43.6567	18.6497	14.3218	27.3872
995	62.5517	14.6452	15.7973	22.3614
996	87.1423	7.93484	17.4636	26.1689
997	74.1231	12.0459	16.0788	25.3161
998	65.1042	20.0189	16.6742	31.9412
999	52.1102	23.2275	14.9634	20.1868
1000	56.3633	20.4263	14.9201	27.0111
1001	63.7101	13.1809	14.9524	33.29
1002	61.2756	7.64622	15.7429	22.2255
1003	95.477	16.7728	14.7362	34.6278
1004	44.2013	12.8846	16.2451	13.5031
1005	46.4424	14.5347	16.6116	22.2544
1006	34.5994	21.3786	15.629	45.9209
1007	65.6634	24.1432	15.1695	35.95
1008	87.2641	11.6158	14.9413	24.8461
1009	85.2415	18.5199	15.2805	6.41433
1010	36.8838	21.5733	15.1582	9.8949
1011	64.5457	20.8063	17.5278	35.4124
1012	70.1592	18.3989	17.2828	24.0273
1013	52.2317	18.4208	16.9044	43.9083
1014	66.9793	19.7388	15.9983	28.8358
1015	62.8944	14.1759	15.502	19.8942
1016	68.0336	12.7814	15.0761	27.6212
1017	36.9913	9.11179	16.7143	8.74535
1018	39.4103	17.2364	15.958	19.2939
1019	56.28	19.4705	15.2103	15.6051
1020	50.5233	14.8886	16.3543	24.7282
1021	50.797	18.2652	15.3667	55.1065
1022	26.0274	17.0651	15.5759	30.1944
1023	50.1579	18.1244	16.9504	30.5287
1024	47.8546	10.148	14.9842	49.2702
1025	44.3876	20.3118	15.841	27.8841
1026	49.0101	12.9183	15.7938	50.6622
1027	62.8532	21.9897	14.7718	38.275
1028	59.8024	14.8289	16.8178	27.8372
1029	50.2104	21.5985	15.3505	25.5571
1030	77.0766	13.8774	16.099	24.5306
1031	82.1798	15.5494	15.7406	27.7123
1032	49.5672	18.9252	17.0123	19.389
1033	54.0817	16.5377	15.7953	54.9497
1034	43.5432	20.3943	16.5457	34.3684
1035	47.7575	18.776	14.5976	26.1487
1036	101.16	18.6211	15.5901	44.4287
1037	57.6324	19.7543	15.4866	39.2445
1038	72.255	7.08047	15.4559	19.7298
1039	66.4391	12.7594	15.3073	36.348
1040	57.441	12.5066	15.8856	27.8829
1041	73.3229	19.5702	15.2504	29.1888
1042	60.3279	14.3546	15.9229	30.6409
1043	62.8476	20.243	15.9061	38.2635
1044	60.0025	14.5228	14.0741	55.2171
1045	83.5839	26.2661	16.6038	8.19808
1046	57.8728	17.8805	15.4016	27.0533
1047	65.3435	16.2419	16.3134	16.5061
1048	55.9632	16.7225	16.335	49.9989
1049	65.7398	8.41343	15.0069	35.8426
1050	83.0393	22.349	15.8632	43.8827
1051	69.6988	18.2137	16.7868	35.5135
1052	64.5669	15.0067	16.4494	44.9742
1053	88.5439	12.4382	16.8512	30.4157
1054	55.1231	15.0126	15.317	54.9457
1055	81.4303	13.4577	15.8651	40.09
1056	77.3847	15.7805	14.5324	5.64091
1057	79.148	17.0699	15.6973	12.5492
1058	60.7264	17.0406	17.5842	41.7723
1059	82.2248	16.3872	16.9498	53.8069
1060	82.2455	16.2917	15.3021	30.4857
1061	49.0027	22.7899	15.1459	35.2375
1062	37.6805	18.7348	17.0963	46.3507
1063	75.343	14.8302	16.0082	24.5349
1064	73.2738	23.7823	15.0974	38.4192
1065	41.3079	14.5022	16.1354	15.9883
1066	76.4896	10.6366	14.9441	47.7912
1067	90.9237	12.8511	15.4887	39.9612
1068	50.5593	22.1668	17.03	26.1096
1069	53.6601	16.7634	15.9715	43.6739
1070	37.814	20.2947	15.9912	41.688
1071	59.4365	10.6379	16.0952	16.9825
1072	56.8964	10.9135	15.4221	29.1633
1073	49.5496	20.1147	14.0223	33.3191
1074	68.0334	13.6759	15.8483	30.322
1075	47.9705	11.1654	16.513	26.7525
1076	52.874	21.2969	16.5605	59.6421
1077	75.405	19.0053	15.5703	20.2374
1078	36.9113	15.6388	16.5691	56.6195
1079	53.2298	12.6156	15.525	29.1345
1080	46.3963	22.4412	16.2599	26.5285
1081	63.7836	17.7038	14.7709	35.6062
1082	68.4047	17.3691	15.9342	27.4152
1083	55.9442	7.62593	14.7717	45.9683
1084	74.9662	13.5812	16.5355	16.1169
1085	40.3784	19.5924	15.7557	24.0396
1086	65.7085	13.7744	16.875	44.8691
1087	40.2975	14.3916	15.7271	33.5025
1088	57.4769	12.8719	16.0491	47.5611
1089	50.0972	17.61	16.9433	34.0701
1090	51.5714	14.4747	15.8956	38.7574
1091	58.8944	15.0426	17.4157	38.1228
1092	63.3212	11.9422	16.2959	38.9793
1093	39.6281	12.8102	15.7556	24.9376
1094	81.2804	10.4794	16.143	33.8094
1095	64.5239	16.9307	16.3314	58.6992
1096	76.7283	9.69116	16.7608	52.0389
1097	77.872	15.2522	16.3836	34.9011
1098	41.853	19.9262	15.59	13.3007
1099	57.979	14.872	15.2536	37.6522
1100	36.7229	22.2979	16.3218	28.2252
1101	57.6104	18.7777	16.6989	26.8679
1102	68.2867	21.4207	13.7385	30.941
1103	78.8399	19.6141	14.8615	12.0446
1104	42.145	17.0809	14.3714	25.5243
1105	49.2409	16.9892	15.5079	49.3596
1106	54.4527	21.304	17.0635	47.6449
1107	54.3932	16.0912	15.8772	28.2328
1108	79.5128	18.7233	16.4823	11.2935
1109	74.6499	20.8876	17.1277	20.7537
1110	65.7367	18.9619	15.8483	21.8747
1111	83.3013	24.8633	16.515	36.3534
1112	64.3174	10.5823	14.8084	44.1919
1113	51.1001	16.7182	15.5024	33.1794
1114	40.7901	13.565	16.1686	20.5252
1115	65.8409	8.28397	17.8376	42.49
1116	86.5939	17.31	16.509	51.1042
1117	52.1359	18.7754	15.1261	12.0072
1118	68.9729	18.2441	15.0575	39.4071
1119	76.4829	17.761	15.5915	13.1935
1120	55.3507	19.2719	16.5136	25.3446
1121	81.244	21.3771	15.7365	44.6987
1122	51.596	21.459	14.8449	17.7263
1123	26.6511	14.2656	16.6019	31.3603
1124	45.9058	10.4032	15.1219	18.4235
1125	73.9151	11.2321	16.3686	30.6361
1126	66.4872	10.8074	15.8701	28.8044
1127	59.9801	20.752	16.5026	26.7848
1128	56.9357	10.8225	14.4701	37.7789
1129	59.7545	20.7766	15.5681	34.0501
1130	65.1319	13.6607	16.1595	43.0313
1131	70.4281	19.8582	16.914	14.0806
1132	43.3456	14.8113	16.2242	24.0507
1133	49.2413	10.7666	16.4565	30.7062
1134	51.7876	11.2758	15.7176	36.968
1135	67.2044	15.7947	15.6533	11.8056
1136	41.6737	19.6195	16.0706	25.7289
1137	66.1384	14.2846	16.7598	37.9402
1138	33.7392	16.9217	16.9906	34.5483
1139	57.9983	15.2354	16.1367	56.8628
1140	52.8207	14.0368	15.9825	34.0661
1141	57.0321	12.3727	16.2888	14.6389
1142	59.9337	20.6929	16.0187	30.2922
1143	59.828	14.9951	15.6219	39.5163
1144	86.271	14.8121	15.9607	15.4944
1145	66.2478	16.7589	16.0275	34.2143
1146	57.4471	14.3214	17.3039	27.5374
1147	58.3836	15.3013	15.9122	34.1942
1148	59.5966	16.6211	16.5658	9.18793
1149	63.6553	16.8865	14.7038	34.8763
1150	92.1092	21.1784	13.8297	37.6427
1151	49.0357	19.7433	15.4439	51.7086
1152	66.3856	17.5925	16.7958	45.7338
1153	72.6618	17.5738	17.2387	36.7279
1154	60.1869	13.4693	16.5061	13.1879
1155	28.7634	28.4508	14.9052	28.3795
1156	56.4131	18.7429	15.8882	28.269
1157	106.699	14.5966	15.6192	33.1094
1158	63.1007	21.2789	16.3508	24.0528
1159	47.9763	19.1871	16.1846	55.0869
1160	45.5504	17.6108	16.1536	24.0194
1161	71.7565	16.4298	15.6465	7.06133
1162	35.4506	14.9396	15.9546	29.1379
1163	46.6714	21.5767	16.5739	43.3967
1164	61.7113	17.2326	16.3684	55.2188
1165	75.0615	10.9613	15.5705	31.0796
1166	74.8381	10.5022	16.2681	30.0546
1167	29.3226	13.4471	16.4449	33.4637
1168	83.8307	12.2428	15.9773	56.7657
1169	85.3696	7.56116	16.6078	22.6746
1170	86.1073	18.0251	14.691	20.8586
1171	59.6906	11.2678	16.2178	31.2404
1172	50.049	20.2896	16.5178	48.5252
1173	90.5539	12.8941	14.9617	29.2186
1174	48.6373	10.025	17.1767	16.3989
1175	84.5761	13.2919	16.482	34.1207
1176	67.786	16.5072	16.434	31.595
1177	63.86	9.83178	16.2359	33.1227
1178	52.6645	15.3021	14.7305	21.4321
1179	53.5096	21.4645	16.0551	29.2521
1180	56.0952	17.5292	16.3606	53.3685
1181	53.1289	19.7851	16.1647	25.8155
1182	34.4053	10.9201	15.4437	40.9807
1183	79.9333	14.1688	16.5292	45.0827
1184	85.858	16.6416	15.3631	32.9582
1185	28.5351	24.6999	15.5997	36.7837
1186	64.8568	18.8587	16.4373	26.803
1187	57.2954	14.4955	17.3869	11.3171
1188	39.3751	8.96972	14.7545	38.2825
1189	55.6106	14.4344	16.6934	23.9524
1190	44.6835	22.9363	16.3448	27.3653
1191	86.1029	16.8632	14.6717	38.739
1192	45.2323	12.6443	15.4359	41.2029
1193	35.8	17.1285	15.4004	41.0732
1194	59.7332	15.1816	16.6618	8.59461
1195	41.377	21.257	16.2845	24.0178
1196	34.2797	9.38066	15.6357	40.1452
1197	54.4178	10.7872	16.1133	4.75469
1198	33.6035	12.2985	14.3667	12.2781
1199	56.253	24.6956	16.4208	19.4884
1200	48.7118	9.53414	16.3803	30.0107
1201	73.3734	13.1149	16.8434	6.12928
1202	61.3272	14.6849	16.4173	50.0239
1203	57.6638	20.0657	15.516	18.3138
1204	58.4442	8.50883	14.6263	57.4887
1205	43.3934	17.6104	15.4942	20.6426
1206	70.4093	14.7964	16.6408	26.2167
1207	43.3097	17.8859	16.2407	21.3923
1208	68.313	6.75212	15.1521	32.5284
1209	61.3725	10.2996	15.4607	21.1286
1210	73.8736	22.1522	15.4571	23.1079
1211	71.049	15.1363	16.1873	18.2771
1212	51.0269	12.485	16.6575	18.7132
1213	72.137	16.3051	17.0372	12.4855
1214	75.569	13.9298	16.7025	33.2259
1215	62.3263	15.2604	17.0229	27.0824
1216	54.1928	17.8409	16.0802	35.6892
1217	82.2724	9.17768	15.8288	19.7773
1218	49.9726	16.4948	15.993	28.4263
1219	47.9269	19.4351	16.5727	16.4825
1220	42.2766	21.889	16.6216	18.6334
1221	33.9272	11.9336	14.36	35.0138
1222	70.3635	8.6047	15.1973	23.2421
1223	73.5672	13.4695	15.5515	24.4649
1224	59.6513	9.6601	16.2589	27.2563
1225	85.7195	19.1831	16.1855	36.0878
1226	74.4154	13.3921	17.4582	20.602
1227	98.5443	17.8125	15.3607	31.6588
1228	78.1408	18.2172	15.9686	36.733
1229	58.0236	8.762	15.8249	22.3198
1230	37.2853	15.6684	15.4351	37.3425
1231	50.4067	14.6904	15.6096	21.7712
1232	68.1061	16.641	17.1181	27.8404
1233	61.0209	11.6303	14.7867	30.7
1234	38.5174	9.12561	16.3619	40.018
1235	68.8293	12.9475	15.7163	19.1007
1236	63.6558	19.1978	16.2838	17.8227
1237	54.7672	16.0365	15.543	44.7646
1238	64.9353	18.3136	15.4817	34.4506
1239	64.3621	12.7834	15.6819	26.8481
1240	58.3599	16.9431	16.6921	37.7142
1241	58.656	18.4341	15.5838	6.19194
1242	65.9762	14.2334	15.0218	37.7934
1243	62.6367	17.2295	15.9631	18.795
1244	58.0517	17.3644	16.3136	23.0217
1245	60.1328	17.416	15.871	41.5514
1246	57.9883	12.4712	16.1714	40.6574
1247	56.3976	21.3436	15.5844	10.6528
1248	86.4612	18.0603	16.5935	16.171
1249	57.5077	14.8302	15.6632	29.2894
1250	62.7849	18.8037	15.9709	41.4336
1251	48.008	19.3134	15.9591	40.8149
1252	65.2794	20.2518	17.7617	43.5106
1253	59.4506	14.9982	16.772	25.9082
1254	71.309	16.8487	16.3698	4.05597
1255	54.504	13.6082	14.992	29.9647
1256	53.3016	14.3086	15.4047	25.8281
1257	37.334	13.5463	14.9112	18.2034
1258	26.6405	18.4945	15.7128	42.0516
1259	55.3792	18.9703	15.5157	26.5317
1260	49.1989	21.4956	17.0317	36.4557
1261	90.4206	23.0893	15.6816	39.075
1262	68.0616	13.671	17.4192	8.02472
1263	40.5393	16.8641	16.1022	38.0575
1264	46.9146	16.3873	15.3491	12.9732
1265	58.5729	14.305	15.6193	19.8409
1266	77.9971	10.3007	15.9959	34.6827
1267	65.2645	18.9061	15.1539	29.8498
1268	54.4739	23.397	16.0049	33.9932
1269	46.3787	22.7128	15.5695	26.4238
1270	90.9699	18.945	16.1663	24.6711
1271	72.5161	18.6533	16.7596	26.0934
1272	68.0525	10.8812	15.9406	12.8792
1273	75.8521	11.1166	15.6142	21.5051
1274	66.2542	9.438	16.4292	37.0491
1275	53.4482	19.4955	15.7633	30.7736
1276	70.5443	15.0806	15.3391	16.1636
1277	47.0866	14.7016	15.5716	8.72362
1278	28.4003	15.7466	16.1528	35.0477
1279	75.5385	14.6582	15.6458	25.3596
1280	53.3222	14.6498	14.3887	37.3623
1281	59.8863	13.579	15.7598	23.6453
1282	65.1397	18.1981	15.3583	21.3253
1283	91.5844	13.625	15.8472	29.6474
1284	62.7709	20.1609	15.8683	14.7044
1285	71.9791	8.46709	16.4831	9.85652
1286	66.0193	19.364	16.4322	40.081
1287	62.3392	19.2667	16.6154	36.2993
1288	73.3792	15.5347	16.2613	28.5571
1289	74.3846	20.7482	15.9383	23.8126
1290	57.033	18.961	16.6511	31.8153
1291	50.334	16.5336	15.9534	25.5608
1292	61.7202	10.2839	15.293	35.0495
1293	76.351	19.0964	16.492	31.8654
1294	60.8892	21.1651	15.4941	38.2302
1295	56.4637	26.2368	15.5458	33.9013
1296	70.8606	17.0655	16.453	28.7502
1297	87.105	9.58122	15.407	32.2171
1298	41.8878	12.027	15.0489	29.8646
1299	76.9734	17.7815	16.8339	45.5807
1300	42.0675	11.3189	15.9883	39.1243
1301	47.2308	9.77941	15.9821	36.4136
1302	84.3799	18.0637	16.3366	29.278
1303	91.0972	18.517	15.6569	30.0106
1304	45.7519	15.4065	15.3368	48.4295
1305	43.2855	16.9737	14.8961	67.0284
1306	70.5837	22.7274	14.7408	30.898
1307	35.0086	14.2335	16.1015	29.7
1308	64.3272	20.3989	15.5646	19.0683
1309	46.8002	11.5982	14.3695	23.0332
1310	68.8713	16.9856	15.5181	46.9022
1311	59.3259	14.9968	16.0661	33.0419
1312	28.7799	10.5466	16.6144	13.7912
1313	87.8562	15.1158	16.6548	25.4255
1314	61.0154	19.1697	14.2327	26.296
1315	32.5528	23.6051	16.9155	33.588
1316	71.5858	20.9436	15.6512	40.8023
1317	66.175	7.39465	16.3273	32.4212
1318	46.4642	7.0685	15.3186	40.1142
1319	73.9218	11.0443	16.3628	40.7645
1320	53.5152	24.2015	17.8666	27.71
1321	34.8489	9.43429	15.0655	38.026
1322	37.5907	13.1119	17.2507	19.6328
1323	47.4799	18.7914	15.4168	28.5939
1324	45.8314	20.0731	15.4727	42.1839
1325	78.4506	15.8027	15.6672	26.682
1326	93.7134	10.4042	16.7947	17.3568
1327	46.5449	12.967	15.3988	39.0545
1328	53.3282	9.45891	15.8619	26.3509
1329	79.627	16.8155	16.3297	32.5253
1330	74.0924	15.9687	15.1509	42.3259
1331	60.5256	11.3897	15.2535	11.4933
1332	42.4316	17.4485	16.5359	25.7905
1333	40.4483	13.6942	15.2097	20.7136
1334	76.6271	16.2494	16.1574	38.3306
1335	71.1303	16.2825	16.391	24.827
1336	62.9298	18.1784	16.3224	26.1473
1337	76.1799	23.4497	14.6739	28.3134
1338	68.0814	15.62	15.7337	32.3693
1339	74.4774	19.2519	16.572	42.9291
1340	72.8263	17.8062	17.1345	21.7619
1341	61.5276	23.0591	16.7081	34.6786
1342	41.4534	21.9888	16.652	22.6811
1343	75.2305	15.337	16.0145	18.0415
1344	48.127	12.4831	15.8294	11.4669
1345	86.9395	8.14365	15.6995	29.602
1346	49.8652	16.8575	15.9157	9.17842
1347	43.6394	15.4938	15.7094	33.2979
1348	53.4772	15.668	15.1067	15.0617
1349	49.9457	18.1054	16.6379	26.3808
1350	66.0104	12.9636	15.5839	28.4651
1351	86.9268	29.4302	15.7091	43.4943
1352	39.5499	15.8744	14.9113	22.3777
1353	74.5335	8.48451	16.7162	12.5662
1354	50.1477	12.3046	16.8135	32.6309
1355	46.6038	12.4781	16.1672	19.7147
1356	98.601	12.5113	16.3494	46.3999
1357	44.54	27.5454	17.131	17.2502
1358	36.4461	18.3609	16.1469	35.969
1359	78.8085	13.4129	15.3516	7.05757
1360	68.3001	17.4371	15.0744	40.7552
1361	38.9947	13.2023	16.3689	34.9658
1362	78.5976	13.8853	16.4863	17.002
1363	75.0657	16.9416	17.1404	11.1148
1364	37.1951	23.9152	16.1721	52.3941
1365	64.1227	10.5189	17.0399	35.32
1366	90.6959	19.5302	15.9973	16.9324
1367	75.1319	19.5782	15.3174	26.1903
1368	67.3131	20.2788	16.1292	42.5596
1369	56.9902	12.7771	15.9666	40.638
1370	67.5054	14.3123	16.6188	20.9881
1371	74.5488	8.94111	16.33	61.8768
1372	58.1631	16.2822	15.4919	27.1752
1373	29.5197	16.0942	15.4818	41.5167
1374	73.3844	15.6035	14.8974	35.6737
1375	71.8611	12.7676	17.9196	33.4706
1376	51.6938	20.7716	16.3616	54.444
1377	67.7779	16.7735	15.3992	30.8807
1378	84.1956	13.7809	16.3018	25.9493
1379	36.1773	11.1038	16.3417	17.7894
1380	58.3031	10.0804	17.083	31.7301
1381	53.9656	13.6855	16.3892	50.5577
1382	86.6181	14.2208	15.5306	26.8879
1383	57.583	19.0859	16.7236	39.8359
1384	54.6372	20.7483	15.1775	26.3237
1385	54.2633	21.3862	15.5627	27.405
1386	85.4428	13.4043	16.5024	16.7418
1387	70.2954	14.2037	16.0787	50.6843
1388	72.4232	24.2843	16.9866	48.1217
1389	47.8835	17.6595	16.5996	28.5905
1390	49.2553	9.85965	15.4206	19.5496
1391	40.6043	15.5024	15.6443	24.4445
1392	66.0673	15.5985	17.2489	51.0208
1393	71.444	13.3618	15.494	43.746
1394	59.5705	23.3999	14.9979	27.9712
1395	80.4271	20.921	16.5435	18.6742
1396	74.1346	13.0229	15.7758	49.1815
1397	69.9328	8.80604	16.3338	28.7791
1398	53.442	24.5383	17.2991	14.3389
1399	63.7173	8.02792	16.0773	44.0897
1400	57.4396	10.7706	16.1223	16.0647
1401	69.2878	13.3879	15.5146	47.0814
1402	70.2421	11.2155	15.3893	41.0404
1403	37.8254	10.3003	15.8174	20.7348
1404	33.1202	27.1637	16.5279	32.8701
1405	103.358	11.5074	15.6439	36.3727
1406	59.4708	17.2454	16.1874	18.1354
1407	57.4585	7.90315	16.8673	22.943
1408	71.7701	13.0117	16.4602	16.2472
1409	31.593	10.6916	15.3676	43.6378
1410	65.5047	12.4988	16.3033	25.6212
1411	71.9703	13.1789	15.7291	47.1825
1412	49.2943	15.4781	14.8295	29.7529
1413	43.0736	12.274	16.4419	44.6652
1414	73.3673	9.92435	14.8302	27.8633
1415	34.4756	15.3958	16.3604	39.8154
1416	77.6072	26.6243	16.6159	43.4424
1417	72.7097	8.15497	15.8056	41.8653
1418	64.2061	17.6159	16.1612	27.1998
1419	71.712	19.6909	15.9852	45.5719
1420	77.1186	8.06397	15.9843	8.73472
1421	51.1478	14.803	15.9611	47.8588
1422	51.1246	17.2694	15.9319	26.014
1423	31.3728	14.3188	15.7972	24.5254
1424	47.3183	7.53086	15.4694	36.8452
1425	64.3306	15.691	15.5788	27.9516
1426	35.9323	14.5283	16.6357	32.795
1427	79.0824	14.8	16.4387	11.4597
1428	86.823	27.2582	17.0547	20.6505
1429	70.8016	10.4644	15.5297	52.4369
1430	34.7739	17.0602	16.0942	4.19826
1431	56.6382	14.5563	14.8524	25.9498
1432	51.2433	11.7851	16.1647	15.3471
1433	56.5728	11.3941	15.7316	33.5186
1434	47.3241	9.86378	16.6026	12.0112
1435	33.6359	12.197	16.3814	36.6579
1436	46.7563	19.551	15.2789	54.8708
1437	67.4684	20.9054	16.9248	25.4746
1438	52.7071	20.1501	15.8484	31.3571
1439	53.3199	12.9779	17.1579	52.7838
1440	72.7636	8.51467	16.0422	28.3508
1441	60.9027	17.0151	16.6196	16.6964
1442	54.4307	16.612	16.1888	38.4189
1443	58.9688	16.5436	17.8046	10.2985
1444	86.2233	13.2797	15.9741	28.5482
1445	73.8189	20.7408	16.5378	12.3667
1446	94.6605	14.0436	15.494	44.2953
1447	83.3635	18.0774	14.9957	19.2935
1448	68.9526	17.6216	15.4893	32.9951
1449	53.5222	18.1656	15.9318	15.5438
1450	58.7103	16.8248	15.5807	27.6687
1451	60.4017	20.0127	16.7141	29.9019
1452	64.9694	18.8981	15.9632	23.584
1453	88.8149	17.6786	14.9876	46.3106
1454	54.4674	19.775	17.1734	44.6705
1455	76.77	11.802	16.2347	45.2269
1456	95.4445	15.2976	17.1489	12.8691
1457	69.7153	19.222	16.628	19.9452
1458	48.788	18.5326	16.0768	23.4575
1459	36.0338	11.0033	16.6125	26.5456
1460	67.9139	24.7952	16.4768	31.3821
1461	56.6113	14.3561	17.062	16.3215
1462	72.5762	12.376	16.6607	23.6123
1463	75.5672	17.2977	15.2563	40.0083
1464	81.438	21.6377	15.1272	51.232
1465	63.6391	17.2909	16.9529	54.0396
1466	76.5066	11.4789	16.04	27.1613
1467	63.2168	11.7545	15.1876	49.4634
1468	47.9842	16.8497	14.4008	28.5774
1469	76.03	17.9995	15.4952	19.6072
1470	40.6072	16.0823	16.7836	26.1589
1471	31.0103	16.8662	15.7009	45.5382
1472	58.4206	17.722	16.0574	26.9119
1473	27.7371	24.2439	16.666	28.9751
1474	62.3623	16.0329	14.8613	20.1137
1475	49.2111	21.631	16.4599	54.269
1476	65.5935	24.0242	15.5344	27.8044
1477	51.6523	10.1326	16.0496	37.6119
1478	51.126	17.2834	16.4354	17.6697
1479	57.0347	14.1703	15.7793	37.8076
1480	30.1531	16.4194	16.9247	27.5338
1481	94.8539	7.90766	16.4689	19.8111
1482	72.7667	16.5502	16.4289	36.9793
1483	28.8609	16.2563	16.5083	21.9703
1484	77.2236	13.6846	15.8817	36.6568
1485	84.369	23.3683	15.4648	35.2048
1486	53.4525	11.0759	16.1922	41.6816
1487	48.7041	15.3925	16.6549	12.4984
1488	55.1895	19.257	14.6692	25.1651
1489	43.9109	20.8262	16.2831	46.6341
1490	39.5607	12.9722	17.4439	41.0275
1491	58.1295	14.323	16.0219	31.3394
1492	70.8603	18.0577	17.695	26.9191
1493	63.3039	14.24	16.2458	26.0787
1494	70.2802	22.4777	15.3087	28.5123
1495	68.089	18.7461	17.2768	42.0339
1496	78.7388	13.6333	14.3387	32.1309
1497	51.1332	15.7955	15.6966	43.4312
1498	51.6472	6.38161	15.9358	40.8563
1499	70.0618	11.8039	16.8244	21.4059
1500	43.3209	8.83171	14.566	41.3561
1501	63.104	16.1492	16.3669	31.847
1502	38.2949	15.3573	15.5256	18.1023
1503	98.5891	10.3842	16.4669	39.602
1504	51.782	21.8869	16.0342	17.7129
1505	44.8808	17.0964	16.2153	28.1981
1506	79.7286	8.44777	17.601	46.4521
1507	57.8311	18.1668	15.5459	21.8344
1508	66.2678	18.8254	15.863	14.4306
1509	52.9335	12.3442	16.2213	47.9577
1510	81.3938	15.6944	14.9792	15.7012
1511	38.0112	23.2881	17.2842	21.1744
1512	89.2669	22.5627	15.8174	34.7984
1513	46.0401	28.6322	15.4702	26.8175
1514	63.5486	13.397	15.3274	18.1139
1515	73.4637	14.4491	14.6814	36.0864
1516	57.0693	8.40274	16.2075	25.2745
1517	47.9289	16.5538	15.8726	46.1202
1518	66.8638	12.0305	15.0049	36.0213
1519	63.8323	20.432	15.2003	42.1338
1520	55.0407	25.9529	15.8941	48.7847
1521	39.9125	21.978	15.8971	40.524
1522	42.021	11.8182	16.5751	33.1839
1523	73.8499	14.0367	15.2468	16.937
1524	58.6158	20.1587	16.1545	28.7363
1525	73.8893	11.4316	16.5225	35.4605
1526	51.105	15.75	16.1088	9.40986
1527	94.9604	12.3155	15.2574	23.1284
1528	62.4652	24.8213	17.5082	18.399
1529	58.8688	19.3891	14.9356	25.0362
1530	64.8557	17.1494	14.6272	27.0232
1531	94.4152	16.0824	15.3427	38.7928
1532	69.3117	16.6065	15.9683	28.1857
1533	55.8889	21.0691	16.6041	23.7424
1534	81.2852	13.5371	16.6394	30.1513
1535	75.6364	11.8402	15.9092	40.6239
1536	45.7765	15.4666	16.4146	8.66286
1537	78.6648	17.253	17.8961	30.1988
1538	46.0631	18.1239	16.8165	38.2909
1539	79.1302	17.318	15.7069	29.546
1540	40.0708	21.2143	14.5491	38.6862
1541	46.5178	13.7009	15.8568	20.5582
1542	69.4435	17.9219	14.7557	39.8242
1543	50.5758	13.546	15.6825	26.1895
1544	35.4354	16.3627	14.6381	31.6066
1545	55.4309	14.0154	16.3451	30.527
1546	68.7928	8.52412	17.6554	49.5037
1547	27.8355	14.4204	15.1311	17.7767
1548	61.8804	19.2587	16.0005	28.9877
1549	50.1012	19.9072	17.4082	43.8504
1550	52.8012	8.51981	15.5465	47.3122
1551	41.6604	17.2004	16.6598	9.56081
1552	56.4934	12.3116	17.2923	19.2138
1553	71.0448	12.0105	15.5411	29.3787
1554	42.2029	16.4493	14.3806	38.7816
1555	87.0412	10.3445	16.1561	24.6728
1556	49.2759	16.0273	16.3491	24.6418
1557	68.7362	10.9053	15.5469	29.2644
1558	69.3654	26.2811	15.7482	32.2304
1559	58.4072	21.1584	16.0528	39.2614
1560	81.2347	18.5227	15.0131	43.2067
1561	81.2966	12.5768	15.4277	32.323
1562	61.849	13.2301	15.9721	37.8075
1563	52.1541	14.5169	15.223	20.0859
1564	51.2324	20.808	15.884	24.6082
1565	82.2589	15.2518	16.0207	38.8322
1566	77.7508	8.92166	16.3007	38.7873
1567	78.7145	12.5412	16.4184	14.2539
1568	69.0911	16.496	16.0375	29.8348
1569	44.7181	14.2175	16.3605	32.3237
1570	61.6204	19.0166	15.8124	50.4515
1571	91.6431	21.6008	16.6868	34.3506
1572	62.9863	15.5196	15.5828	35.6061
1573	46.2048	16.4574	15.6344	9.44994
1574	28.3477	15.9302	15.6115	38.9611
1575	54.1665	21.9158	15.621	36.0687
1576	41.6448	12.9168	15.7241	25.8747
1577	79.2028	6.45786	15.9114	24.5402
1578	59.6518	14.1768	15.8527	33.3981
1579	49.0688	11.7773	15.3011	15.8847
1580	60.619	13.7499	15.5311	29.8005
1581	64.8511	17.0455	17.3491	23.3349
1582	45.8845	11.4554	16.0356	43.5251
1583	60.1526	14.5196	16.4839	42.8198
1584	86.8838	12.6167	16.6079	16.1276
1585	55.8434	17.6448	15.4843	42.232
1586	40.9567	6.01622	16.7182	32.1482
1587	81.2587	9.32762	16.3389	10.0376
1588	61.8973	12.3772	15.5825	20.0291
1589	52.203	14.9308	15.7019	22.9699
1590	63.0055	15.6355	14.4827	21.0258
1591	60.2884	16.8822	15.314	25.3024
1592	50.5865	9.39704	16.0299	18.9913
1593	54.0737	14.5779	15.3121	34.35
1594	60.0135	7.32471	15.735	22.7539
1595	41.3857	9.23763	16.1203	44.5273
1596	79.1316	13.6532	16.1707	36.5765
1597	90.0398	16.9614	15.5782	22.4523
1598	66.6676	19.5456	15.6548	32.5961
1599	65.7828	13.0511	16.9195	22.979
1600	81.0296	17.5421	15.8138	43.0152
1601	70.4656	17.961	14.6139	24.7722
1602	83.845	15.8169	16.0233	25.5062
1603	37.9777	15.6827	16.047	37.14
1604	79.3836	18.2531	15.8903	31.9
1605	76.5806	17.4573	15.8442	30.3805
1606	65.1054	18.3661	15.6191	41.8125
1607	88.7945	22.3877	15.27	19.4422
1608	60.7338	18.8481	16.0677	33.7831
1609	66.0994	13.7105	15.3321	43.2055
1610	70.8267	19.6055	16.3712	41.0017
1611	66.8011	24.4837	16.4682	25.3923
1612	54.5115	11.566	15.5869	22.9904
1613	87.4765	15.6246	15.6026	35.0739
1614	76.1003	7.82789	15.8359	23.9289
1615	42.027	17.6236	15.2733	30.7085
1616	60.075	20.3363	15.2752	18.0344
1617	82.9942	19.5312	16.7252	42.5469
1618	35.3273	21.6117	15.0848	31.498
1619	67.5682	13.295	16.1283	22.8274
1620	46.2147	20.178	16.8075	17.1423
1621	80.0373	11.0213	14.6099	33.6922
1622	79.8173	10.1122	16.0307	10.7064
1623	70.3021	14.6509	15.7655	27.6179
1624	27.8861	15.7362	15.5924	25.5814
1625	59.2553	18.3008	15.691	27.3109
1626	85.6501	17.3089	16.7035	32.2131
1627	32.0952	19.2574	15.4489	7.22941
1628	74.1058	15.1218	16.4939	19.0792
1629	61.9544	21.6671	16.2854	46.4698
1630	44.734	18.2656	15.5488	15.3603
1631	66.0926	15.0601	14.6771	27.3952
1632	62.1958	15.9292	16.2249	21.7541
1633	45.9977	14.1284	17.4197	12.5843
1634	71.826	19.6277	15.9897	47.0307
1635	69.5524	17.9708	16.8363	17.2146
1636	63.2043	19.7957	16.2928	27.8548
1637	74.8368	7.07713	15.8672	12.948
1638	39.7215	17.2463	15.6551	30.2888
1639	72.4941	8.40394	15.2769	7.94769
1640	57.1562	17.7583	16.6438	42.9371
1641	97.3695	7.59069	16.4212	25.9982
1642	82.7036	11.4499	16.7744	33.9091
1643	62.461	13.4346	16.1376	17.5442
1644	81.9143	18.1215	15.475	46.5618
1645	65.355	19.6196	16.0012	34.2993
1646	38.4372	17.4621	15.6786	23.0158
1647	28.7413	15.7542	14.7414	40.5126
1648	36.1543	18.7071	15.9037	21.0603
1649	73.2918	21.7634	16.5977	41.0234
1650	62.6062	15.5561	16.3199	28.8541
1651	85.2771	17.3074	16.0296	20.769
1652	82.6958	11.8589	16.2186	42.4291
1653	61.9834	9.01421	15.0462	30.9574
1654	63.1364	6.35318	15.7943	24.8348
1655	39.7832	19.0105	15.4309	45.9721
1656	61.7332	13.6379	15.6571	28.5029
1657	62.6435	16.4682	17.5866	45.1169
1658	68.1286	8.18424	15.3357	26.2967
1659	75.6664	9.42781	17.218	47.7961
1660	46.4601	9.77565	16.3489	28.1169
1661	59.2331	11.4417	14.8672	41.914
1662	40.4788	22.0511	14.7359	32.618
1663	39.8801	15.4813	17.1913	25.0283
1664	73.0459	23.955	15.6027	47.2749
1665	86.6836	21.8332	15.6394	31.1458
1666	54.3618	11.8897	15.2412	19.6559
1667	49.8254	10.2207	16.6019	28.0138
1668	54.4172	17.1796	15.0254	22.8522
1669	81.4835	7.61979	14.5419	27.4909
1670	40.0969	18.6558	15.0654	35.9865
1671	74.7107	14.1245	15.6825	38.7316
1672	51.127	8.68701	15.1858	14.8259
1673	60.0047	9.23764	15.9155	17.7086
1674	54.7667	17.0077	16.153	40.7489
1675	61.9484	21.3421	16.3134	16.8753
1676	44.1171	15.1857	16.78	22.6553
1677	40.2872	19.579	15.8999	35.3055
1678	53.2571	11.0398	16.2975	31.6243
1679	59.6229	16.5216	14.9797	32.9292
1680	76.6417	13.04	16.7574	44.7607
1681	58.307	12.329	17.1423	17.3979
1682	59.9525	22.9298	16.0697	17.3785
1683	83.6345	16.4247	15.111	28.3561
1684	56.5335	12.4303	14.5524	24.6394
1685	55.9292	17.2379	14.5663	31.2988
1686	75.5168	19.6514	14.8308	26.8914
1687	50.4968	17.332	15.3384	20.0722
1688	51.7285	15.5082	15.233	14.59
1689	62.364	11.9165	16.966	29.7775
1690	77.2825	9.78666	14.8994	36.383
1691	52.4345	17.5644	16.4242	42.4739
1692	66.4863	16.9826	15.5987	36.0469
1693	44.1819	19.984	15.9712	25.6941
1694	59.776	11.388	16.7061	32.5791
1695	61.9409	9.43587	15.2041	37.2706
1696	33.2713	22.0201	16.374	16.6106
1697	76.0341	21.3893	15.2022	50.5721
1698	45.6951	16.3867	15.1617	21.9384
1699	74.282	15.653	15.4883	23.1434
1700	67.6172	12.5917	15.3578	16.079
1701	56.3287	16.178	14.9962	28.8386
1702	70.7918	18.7282	15.1062	36.1713
1703	51.1874	16.3367	15.9732	22.1899
1704	64.1241	24.4716	16.1796	19.2252
1705	52.8225	15.2111	15.5497	50.4645
1706	79.0502	15.2669	16.0619	32.0085
1707	34.6531	8.77214	15.9316	42.7425
1708	46.0927	22.6496	15.6731	13.658
1709	51.0398	16.4125	14.542	38.9559
1710	65.054	18.1376	15.9522	38.2976
1711	58.3999	8.73477	14.838	31.0764
1712	40.7455	12.6913	14.9666	42.3631
1713	48.1925	7.54948	16.3041	29.7732
1714	46.0831	18.1289	15.4066	27.1985
1715	104.393	20.5736	15.5122	21.3143
1716	52.6474	18.3517	16.3624	25.0916
1717	52.1185	9.2724	17.1033	16.2989
1718	89.3899	13.3025	16.9239	31.2034
1719	63.5592	12.044	16.2368	36.0145
1720	56.5085	12.9385	14.8087	5.97982
1721	41.2093	12.108	15.1842	19.5157
1722	59.02	22.3783	15.067	23.4423
1723	58.2129	14.2666	16.6122	22.7876
1724	62.1162	12.3578	14.9945	16.982
1725	31.6587	17.3202	15.5693	26.9492
1726	71.5757	13.722	14.9595	39.2595
1727	73.4077	23.7119	15.5324	18.4782
1728	74.1364	17.1924	15.7084	41.1121
1729	53.1723	19.4915	16.7193	41.036
1730	58.8031	13.0969	14.3123	38.7236
1731	68.6254	17.4281	14.3353	37.68
1732	37.7963	18.5518	15.0693	29.9936
1733	68.8734	15.859	15.4158	49.0528
1734	41.244	11.4064	16.2328	40.2195
1735	60.7783	14.7055	14.7079	32.9924
1736	63.832	8.92723	16.3892	42.223
1737	40.1249	21.1772	15.469	30.1817
1738	62.1319	17.3345	15.1471	35.9451
1739	76.3888	15.261	16.562	33.3648
1740	67.9255	14.448	17.0188	39.5361
1741	75.0155	12.2629	17.0715	29.8813
1742	70.5901	16.6529	16.4708	29.348
1743	61.3752	12.6051	16.9688	44.5949
1744	28.0761	18.6136	16.1361	29.9389
1745	49.8257	10.5987	15.8389	17.6724
1746	93.6854	10.9378	14.9533	29.0676
1747	67.4437	15.4512	15.4041	39.8723
1748	63.3507	14.1447	14.5412	27.1362
1749	45.3702	14.8343	15.687	51.3779
1750	76.7636	18.4198	17.1275	20.4358
1751	65.0664	10.2182	17.1575	49.0196
1752	57.9634	19.6248	16.0456	19.2665
1753	62.6748	11.8177	15.8022	35.1358
1754	36.494	24.02	15.6542	30.3062
1755	87.5482	13.9758	15.6594	19.8101
1756	33.0558	19.7992	17.3612	38.6036
1757	64.239	19.1466	16.1951	21.8937
1758	71.0206	18.7781	16.3042	27.3371
1759	62.643	17.5972	15.1861	35.3152
1760	36.3536	14.7371	15.0829	24.2112
1761	72.5194	18.628	15.4082	50.0811
1762	39.0391	12.4206	15.9095	20.715
1763	60.2406	18.6763	15.2855	37.2228
1764	57.0539	21.2952	15.4496	22.4893
1765	74.9123	22.3971	16.4296	22.4114
1766	69.4665	19.8373	16.0752	29.4886
1767	41.4798	16.2907	16.115	53.9536
1768	48.3101	18.6151	16.6091	23.4253
1769	68.6774	14.6652	16.9719	46.8625
1770	53.466	10.6418	14.58	10.1051
1771	52.5799	19.1815	15.457	47.3186
1772	72.0538	15.4832	15.5274	33.65
1773	62.6059	18.626	16.888	4.38859
1774	38.3693	10.8329	16.5998	15.6764
1775	58.7982	13.5072	16.4282	18.7452
1776	84.935	11.5907	15.9236	13.9384
1777	80.3094	15.3462	15.8299	10.4418
1778	75.4701	15.4905	15.4156	27.6103
1779	69.2274	10.2974	16.4695	44.0773
1780	62.7955	10.3944	15.5496	40.8002
1781	50.5562	17.0834	14.9049	52.1267
1782	69.8049	21.0512	16.7026	24.0708
1783	102.074	13.3409	17.1067	19.9904
1784	41.9251	18.5813	15.7186	38.8216
1785	73.8768	23.0207	15.9159	31.4796
1786	57.2885	14.3668	15.7274	26.4159
1787	63.3936	12.7292	15.0201	31.5609
1788	58.2903	18.367	16.282	18.6356
1789	72.758	14.9471	16.3364	41.5319
1790	76.8567	13.6886	17.5272	29.5385
1791	77.95	16.9415	15.7431	32.6905
1792	60.8741	6.46593	15.6374	29.9224
1793	74.0928	14.0563	17.225	14.6569
1794	40.141	12.9694	16.7042	36.7981
1795	63.6589	12.3742	15.2951	20.8602
1796	64.3047	19.7985	16.6509	29.047
1797	69.0104	12.151	16.2999	44.7581
1798	66.2357	7.79183	16.079	27.5678
1799	68.1964	12.782	14.9582	33.5146
1800	47.1435	16.315	16.523	11.0622
1801	62.8581	18.9757	16.3014	56.7797
1802	32.049	17.8461	14.0829	19.8132
1803	55.2994	9.17434	17.2508	18.7868
1804	42.5479	22.6584	15.1585	29.6034
1805	69.437	23.3014	15.7388	21.6338
1806	62.2405	10.3579	16.8283	15.6192
1807	52.3374	21.4895	15.9986	26.7546
1808	81.3557	10.1038	15.325	36.9699
1809	46.0277	17.6558	15.8618	26.2433
1810	43.1646	12.6317	16.0979	33.6821
1811	75.778	12.8988	16.2492	21.9477
1812	65.6325	8.86083	14.0885	28.3833
1813	75.6177	13.959	16.3108	41.8408
1814	53.8117	23.4011	16.2684	41.9372
1815	71.9485	18.1108	16.3013	20.9962
1816	62.6725	18.138	16.5002	51.0349
1817	66.9984	18.7057	16.8044	22.6594
1818	45.4392	6.20875	16.3736	54.9187
1819	59.984	8.39492	14.6116	13.8539
1820	55.5554	23.668	16.551	32.8133
1821	68.6806	20.0816	14.6263	32.0674
1822	95.4038	15.613	16.0762	30.0169
1823	66.6303	14.8865	15.584	42.8955
1824	33.0642	28.7228	15.9498	47.3522
1825	45.6196	20.4016	15.8252	43.9061
1826	53.1093	17.9996	15.6323	14.9937
1827	39.5474	11.9595	15.9296	40.2961
1828	72.2216	12.4678	16.2439	39.7574
1829	66.8215	13.0658	16.2669	32.7285
1830	44.9421	14.3781	16.3932	62.8179
1831	104.708	18.6146	15.7786	48.0985
1832	55.9824	12.2902	15.4266	40.9511
1833	80.7551	15.7246	15.5961	14.9335
1834	69.8058	12.8392	16.1694	36.6013
1835	67.28	14.5927	15.9806	23.0751
1836	53.7666	14.4994	16.2742	37.0253
1837	66.2287	23.0177	14.7075	48.2071
1838	55.0405	20.4073	15.3833	43.1577
1839	51.6588	11.5812	15.0875	37.623
1840	50.8873	17.6087	16.1831	32.9896
1841	72.2005	13.0997	16.67	11.6719
1842	58.3933	12.2709	15.4232	25.0454
1843	50.9813	25.6607	15.8646	29.757
1844	66.2753	18.7102	17.3417	50.4295
1845	72.1696	9.17997	15.0415	23.8744
1846	60.4719	18.8391	16.1878	22.5235
1847	48.2124	23.7092	14.969	56.7212
1848	36.7755	17.0408	16.3503	31.4068
1849	55.0816	9.64462	15.95	37.2228
1850	52.7837	7.17636	16.1189	6.01471
1851	101.858	15.9138	16.4496	46.3942
1852	62.3407	15.6918	15.4204	26.1848
1853	63.9542	14.1567	17.2352	34.4396
1854	89.4669	21.3974	16.1198	21.4205
1855	69.6968	13.7462	15.8861	20.5072
1856	46.3074	20.9187	15.1413	36.1343
1857	66.0279	11.8243	15.9906	33.8242
1858	70.9231	15.0545	15.6264	39.6371
1859	70.1726	13.4336	15.9986	13.1071
1860	59.3138	15.0823	15.3591	62.0595
1861	41.1643	18.1805	15.8517	18.6484
1862	32.8965	19.5919	16.5299	34.1802
1863	65.6669	15.308	17.1204	7.17285
1864	47.7039	16.7124	14.8046	28.0481
1865	81.9235	8.99664	15.4661	14.0826
1866	50.9455	10.9647	16.2094	24.9723
1867	66.7893	15.8272	16.5526	26.1382
1868	63.0469	21.3064	16.9723	32.5174
1869	62.3665	13.937	15.9535	56.2335
1870	79.1764	22.34	14.6816	19.126
1871	70.9333	28.2417	15.7105	36.0243
1872	70.5124	18.1364	15.8001	21.5568
1873	49.9405	19.665	15.4388	34.4508
1874	69.4067	19.0668	16.4384	22.561
1875	72.9156	7.88518	16.6571	10.8717
1876	50.8899	8.35268	16.0422	39.8834
1877	59.4378	15.5913	15.7879	43.3841
1878	60.4464	23.0878	16.4671	12.8061
1879	60.9466	12.5462	14.9475	34.8422
1880	54.6446	11.1457	15.286	9.90465
1881	51.999	12.4646	15.8641	45.3592
1882	85.708	28.4795	15.8769	25.3498
1883	57.7503	12.5478	16.498	30.8075
1884	86.484	19.7574	14.3546	24.6127
1885	54.7725	14.0533	15.3082	27.6186
1886	48.1419	16.4884	15.7533	30.8134
1887	87.6338	15.8157	15.8733	46.8369
1888	50.6976	13.2209	15.1047	19.9231
1889	87.5587	23.6192	15.5957	24.0989
1890	70.3231	16.7312	16.6778	40.1365
1891	60.6253	19.046	14.5931	25.0259
1892	76.8078	10.8533	17.9953	29.5419
1893	65.8692	14.1062	16.616	36.2556
1894	29.8499	12.0637	15.4606	33.4182
1895	71.5695	26.5637	15.9121	31.1864
1896	55.1837	10.822	15.2659	21.7503
1897	45.1935	11.7597	16.7738	51.3917
1898	29.5485	20.4053	15.8755	34.6952
1899	65.6648	14.3636	15.3751	30.7221
1900	78.6041	13.6115	16.2135	40.1116
1901	67.6288	13.1168	17.1059	37.4127
1902	76.372	11.0243	15.8888	43.0997
1903	51.6354	15.0509	16.5812	31.4169
1904	62.8653	25.6715	15.9514	36.7938
1905	55.7284	18.6669	16.3641	44.3834
1906	73.7349	7.87781	16.0289	28.0191
1907	46.3783	21.2264	14.7906	15.4271
1908	84.4663	17.3148	15.2478	40.2942
1909	80.4745	21.8374	15.2897	31.5292
1910	61.3248	17.6727	15.3482	40.5092
1911	104.871	17.7583	14.8093	53.2782
1912	70.6464	9.65807	15.4895	16.8821
1913	92.1318	14.2752	16.0328	15.1949
1914	80.0684	15.0954	15.3874	35.5737
1915	66.4369	7.95581	15.1575	16.7862
1916	85.7619	14.1275	16.3568	7.19895
1917	69.3528	13.1102	15.2144	59.3022
1918	33.6041	17.3343	17.4906	22.6739
1919	59.2711	22.288	16.6607	39.8965
1920	72.688	17.3969	14.6129	25.5844
1921	81.5448	8.47767	16.2014	20.8265
1922	55.2165	17.8015	16.9172	25.0937
1923	67.0434	11.5876	16.1182	39.9232
1924	74.5998	14.9289	13.8991	30.1554
1925	55.5925	20.1038	16.2161	18.948
1926	63.5872	21.1282	16.9231	30.5534
1927	63.8826	7.35582	15.2751	35.3954
1928	50.3274	18.6659	17.2997	48.8646
1929	34.1245	20.0341	16.0461	37.1608
1930	34.5674	6.43122	16.2289	37.2721
1931	59.3991	19.3987	16.0916	27.4681
1932	46.5987	15.2366	15.4022	36.9166
1933	73.5423	15.6622	14.5555	53.3127
1934	60.9149	10.0401	15.076	17.3115
1935	74.5244	8.3171	14.8355	22.3892
1936	80.1978	18.6161	15.7747	16.6702
1937	67.0639	16.2835	16.8634	23.351
1938	75.3115	14.7331	15.8753	19.7473
1939	51.5559	17.2894	15.0214	36.339
1940	77.9972	24.4696	15.5576	37.6949
1941	88.599	13.4068	15.4546	16.964
1942	60.0837	11.5411	15.9882	46.2088
1943	67.0225	15.5761	15.8233	44.8547
1944	74.7561	28.0941	15.5636	28.5333
1945	81.4461	17.3575	16.5776	45.5761
1946	33.3511	21.5415	15.1144	44.9223
1947	56.1873	11.7675	15.9871	9.32512
1948	40.9506	18.688	17.3617	41.6973
1949	77.0952	16.0075	14.3195	38.4994
1950	43.5698	16.5908	15.1378	36.4186
1951	59.1348	15.4787	15.2499	32.5819
1952	35.839	11.0541	17.1764	22.0178
1953	60.474	20.3868	15.3337	33.7319
1954	33.4307	14.7581	13.9809	11.8949
1955	68.8739	20.687	16.7961	10.8706
1956	32.9753	7.74829	16.607	10.5381
1957	75.5076	18.3902	14.8289	34.5416
1958	50.769	20.7113	15.617	49.9696
1959	43.8786	9.3998	15.613	21.464
1960	69.6352	15.2013	15.6977	41.5063
1961	62.7556	14.7238	15.3667	32.5006
1962	65.1209	11.027	16.0413	19.5106
1963	44.1015	16.8103	15.1623	47.283
1964	71.724	18.2566	15.7609	31.0414
1965	85.0752	14.1663	14.8284	31.9873
1966	63.7703	14.8843	15.6585	24.5129
1967	78.6157	10.5158	16.6991	28.2946
1968	37.6983	24.025	14.922	38.3833
1969	52.339	8.426	16.5279	50.356
1970	26.5326	12.2618	15.9982	14.4177
1971	65.4817	17.5516	16.8767	26.4062
1972	31.6453	18.9777	16.1947	18.2086
1973	75.7022	13.7237	15.8926	20.3208
1974	46.0568	22.8088	16.5365	21.0969
1975	64.9556	16.1814	16.2864	33.8575
1976	56.4564	14.938	15.7422	30.6802
1977	73.4221	13.6875	16.7455	5.7749
1978	101.446	19.2848	15.7971	37.126
1979	75.388	19.8647	15.106	29.7368
1980	46.8482	20.0115	16.6618	28.9646
1981	52.1516	18.1289	17.0029	24.7844
1982	65.8729	12.4749	14.849	41.6809
1983	60.2571	19.0088	15.6658	31.3334
1984	72.1264	7.48486	16.1537	43.5654
1985	71.9677	14.0426	17.0959	24.7817
1986	60.3361	7.45602	15.9313	11.9609
1987	40.6843	22.2914	16.5392	33.0848
1988	65.2624	14.5158	16.4031	43.36
1989	71.3754	15.2414	15.7654	28.8828
1990	50.9419	10.5176	16.7108	18.6575
1991	57.8626	9.12817	14.7359	37.3266
1992	63.2888	16.0038	15.6956	41.6224
1993	42.0329	14.7474	15.187	27.4718
1994	82.7093	18.7883	15.7531	17.8876
1995	57.6054	12.6281	14.5842	21.6816
1996	67.8326	12.8282	14.5343	26.927
1997	30.6438	21.4306	15.2001	16.7187
1998	63.3509	14.2245	16.5378	22.7427
1999	53.6667	18.7076	16.8006	36.7236
[truncated: 8,001 more rows]

## Sheet: Simulation Output Values 1
Sim #	ADD	ADDc	CR	HQ
1	4.69799e-06	1.06577e-06	7.10515e-07	0.01566
2	1.2313e-05	2.79329e-06	1.8622e-06	0.0410434
3	3.37124e-06	7.6479e-07	5.0986e-07	0.0112375
4	1.51035e-06	3.42634e-07	2.28423e-07	0.0050345
5	4.74997e-06	1.07756e-06	7.18376e-07	0.0158332
6	2.0639e-05	4.6821e-06	3.1214e-06	0.0687966
7	8.35779e-06	1.89602e-06	1.26402e-06	0.0278593
8	1.01198e-05	2.29576e-06	1.53051e-06	0.0337328
9	6.15227e-06	1.39569e-06	9.30457e-07	0.0205076
10	7.85158e-06	1.78119e-06	1.18746e-06	0.0261719
11	5.47008e-06	1.24093e-06	8.27284e-07	0.0182336
12	5.81492e-06	1.31916e-06	8.79437e-07	0.0193831
13	2.72227e-06	6.17566e-07	4.11711e-07	0.00907423
14	5.37196e-06	1.21867e-06	8.12445e-07	0.0179065
15	1.8068e-05	4.09886e-06	2.73258e-06	0.0602268
16	8.73998e-06	1.98273e-06	1.32182e-06	0.0291333
17	7.54231e-06	1.71103e-06	1.14068e-06	0.025141
18	4.08094e-06	9.25789e-07	6.17193e-07	0.0136031
19	3.72875e-06	8.45895e-07	5.6393e-07	0.0124292
20	3.72187e-06	8.44333e-07	5.62889e-07	0.0124062
21	6.36338e-06	1.44358e-06	9.62386e-07	0.0212113
22	6.4329e-06	1.45935e-06	9.729e-07	0.021443
23	4.07399e-06	9.24214e-07	6.16142e-07	0.01358
24	6.72829e-06	1.52636e-06	1.01757e-06	0.0224276
25	1.71616e-05	3.89323e-06	2.59549e-06	0.0572054
26	1.08249e-05	2.4557e-06	1.63713e-06	0.0360829
27	1.02411e-05	2.32326e-06	1.54884e-06	0.0341369
28	5.48174e-06	1.24357e-06	8.29048e-07	0.0182725
29	5.10098e-06	1.15719e-06	7.71462e-07	0.0170033
30	6.51323e-06	1.47757e-06	9.85048e-07	0.0217108
31	9.36382e-06	2.12425e-06	1.41617e-06	0.0312127
32	6.91345e-06	1.56837e-06	1.04558e-06	0.0230448
33	1.71636e-05	3.89369e-06	2.59579e-06	0.0572121
34	5.9204e-06	1.34309e-06	8.95391e-07	0.0197347
35	1.64706e-05	3.73647e-06	2.49098e-06	0.054902
36	1.88977e-05	4.28708e-06	2.85805e-06	0.0629923
37	2.99187e-06	6.78728e-07	4.52485e-07	0.00997292
38	2.93801e-06	6.66509e-07	4.4434e-07	0.00979338
39	6.65266e-06	1.5092e-06	1.00614e-06	0.0221755
40	4.20631e-06	9.54232e-07	6.36155e-07	0.014021
41	7.40201e-06	1.6792e-06	1.11947e-06	0.0246734
42	7.72474e-06	1.75241e-06	1.16827e-06	0.0257491
43	9.15277e-06	2.07637e-06	1.38425e-06	0.0305092
44	1.54853e-05	3.51296e-06	2.34197e-06	0.0516178
45	5.30153e-06	1.20269e-06	8.01794e-07	0.0176718
46	8.93006e-06	2.02585e-06	1.35057e-06	0.0297669
47	3.55059e-06	8.05476e-07	5.36984e-07	0.0118353
48	5.57783e-06	1.26537e-06	8.43581e-07	0.0185928
49	4.9948e-06	1.13311e-06	7.55403e-07	0.0166493
50	3.11674e-06	7.07054e-07	4.71369e-07	0.0103891
51	1.11092e-05	2.52019e-06	1.68013e-06	0.0370306
52	1.87173e-06	4.24615e-07	2.83076e-07	0.00623909
53	5.23543e-06	1.1877e-06	7.91797e-07	0.0174514
54	2.4667e-06	5.59589e-07	3.7306e-07	0.00822235
55	1.15658e-05	2.62378e-06	1.74919e-06	0.0385526
56	4.93782e-06	1.12018e-06	7.46787e-07	0.0164594
57	5.26726e-06	1.19492e-06	7.9661e-07	0.0175575
58	6.69844e-06	1.51959e-06	1.01306e-06	0.0223281
59	5.62732e-06	1.2766e-06	8.51065e-07	0.0187577
60	6.06827e-06	1.37663e-06	9.17754e-07	0.0202276
61	1.36689e-05	3.1009e-06	2.06726e-06	0.0455631
62	7.55703e-06	1.71437e-06	1.14291e-06	0.0251901
63	1.16577e-05	2.64462e-06	1.76308e-06	0.0388589
64	1.16111e-06	2.63406e-07	1.75604e-07	0.00387036
65	7.55757e-06	1.71449e-06	1.14299e-06	0.0251919
66	7.36592e-06	1.67101e-06	1.11401e-06	0.0245531
67	3.45941e-06	7.84792e-07	5.23195e-07	0.0115314
68	8.89932e-06	2.01887e-06	1.34592e-06	0.0296644
69	1.54743e-05	3.51045e-06	2.3403e-06	0.0515809
70	1.1285e-05	2.56009e-06	1.70673e-06	0.0376168
71	3.97101e-06	9.00852e-07	6.00568e-07	0.0132367
72	6.09235e-06	1.38209e-06	9.21395e-07	0.0203078
73	1.68413e-05	3.82057e-06	2.54705e-06	0.0561377
74	4.04029e-06	9.16568e-07	6.11045e-07	0.0134676
75	4.93093e-06	1.11862e-06	7.45745e-07	0.0164364
76	9.33492e-06	2.11769e-06	1.4118e-06	0.0311164
77	4.26917e-06	9.68491e-07	6.45661e-07	0.0142306
78	1.75068e-05	3.97153e-06	2.64769e-06	0.0583558
79	9.40518e-06	2.13363e-06	1.42242e-06	0.0313506
80	4.72705e-06	1.07236e-06	7.1491e-07	0.0157568
81	4.54823e-06	1.0318e-06	6.87866e-07	0.0151608
82	6.11793e-06	1.3879e-06	9.25263e-07	0.0203931
83	6.18545e-06	1.40321e-06	9.35476e-07	0.0206182
84	1.45647e-05	3.3041e-06	2.20273e-06	0.0485489
85	1.03243e-05	2.34215e-06	1.56143e-06	0.0344145
86	4.88343e-06	1.10784e-06	7.3856e-07	0.0162781
87	8.83899e-06	2.00519e-06	1.33679e-06	0.0294633
88	7.22423e-06	1.63887e-06	1.09258e-06	0.0240808
89	5.02007e-06	1.13884e-06	7.59226e-07	0.0167336
90	5.28234e-06	1.19834e-06	7.98891e-07	0.0176078
91	7.78852e-06	1.76688e-06	1.17792e-06	0.0259617
92	2.39235e-06	5.42721e-07	3.61814e-07	0.00797449
93	3.46347e-06	7.85712e-07	5.23808e-07	0.0115449
94	7.58591e-06	1.72092e-06	1.14728e-06	0.0252864
95	9.27923e-06	2.10506e-06	1.40337e-06	0.0309308
96	1.27972e-05	2.90313e-06	1.93542e-06	0.0426572
97	2.16541e-05	4.9124e-06	3.27493e-06	0.0721804
98	1.02986e-05	2.33631e-06	1.55754e-06	0.0343287
99	1.15671e-05	2.62408e-06	1.74939e-06	0.038557
100	2.52142e-06	5.72002e-07	3.81335e-07	0.00840473
101	9.06555e-06	2.05659e-06	1.37106e-06	0.0302185
102	5.75937e-06	1.30655e-06	8.71036e-07	0.0191979
103	2.16901e-05	4.92055e-06	3.28037e-06	0.0723003
104	5.53517e-06	1.25569e-06	8.37129e-07	0.0184506
105	9.02542e-06	2.04748e-06	1.36499e-06	0.0300847
106	2.69255e-06	6.10824e-07	4.07216e-07	0.00897517
107	7.20825e-06	1.63524e-06	1.09016e-06	0.0240275
108	5.27056e-06	1.19566e-06	7.97109e-07	0.0175685
109	8.53155e-06	1.93544e-06	1.2903e-06	0.0284385
110	1.17554e-05	2.66681e-06	1.77787e-06	0.0391848
111	8.40566e-06	1.90688e-06	1.27126e-06	0.0280189
112	9.3939e-06	2.13107e-06	1.42072e-06	0.031313
113	1.70465e-05	3.86713e-06	2.57809e-06	0.0568218
114	5.04116e-06	1.14362e-06	7.62416e-07	0.0168039
115	7.64917e-06	1.73527e-06	1.15685e-06	0.0254972
116	1.49551e-05	3.39267e-06	2.26178e-06	0.0498503
117	1.01785e-05	2.30907e-06	1.53938e-06	0.0339284
118	4.94519e-06	1.12185e-06	7.47901e-07	0.016484
119	1.10669e-05	2.5106e-06	1.67373e-06	0.0368896
120	4.4653e-06	1.01299e-06	6.75324e-07	0.0148843
121	8.55355e-06	1.94043e-06	1.29362e-06	0.0285118
122	6.22838e-06	1.41295e-06	9.41969e-07	0.0207613
123	1.3391e-05	3.03785e-06	2.02524e-06	0.0446368
124	1.51733e-05	3.44216e-06	2.29477e-06	0.0505775
125	7.0899e-06	1.6084e-06	1.07226e-06	0.023633
126	7.17891e-06	1.62859e-06	1.08572e-06	0.0239297
127	7.34281e-06	1.66577e-06	1.11051e-06	0.024476
128	8.64691e-06	1.96161e-06	1.30774e-06	0.028823
129	7.33734e-06	1.66453e-06	1.10969e-06	0.0244578
130	3.52979e-06	8.00758e-07	5.33839e-07	0.011766
131	4.5657e-06	1.03576e-06	6.90508e-07	0.015219
132	1.33496e-05	3.02846e-06	2.01898e-06	0.0444988
133	8.29612e-06	1.88203e-06	1.25469e-06	0.0276537
134	9.90148e-06	2.24622e-06	1.49748e-06	0.0330049
135	5.99746e-06	1.36057e-06	9.07045e-07	0.0199915
136	1.98163e-06	4.49547e-07	2.99698e-07	0.00660544
137	5.2887e-06	1.19978e-06	7.99853e-07	0.017629
138	8.9455e-06	2.02935e-06	1.3529e-06	0.0298183
139	1.03887e-05	2.35674e-06	1.57116e-06	0.0346289
140	6.92427e-06	1.57082e-06	1.04721e-06	0.0230809
141	9.03525e-06	2.04971e-06	1.36647e-06	0.0301175
142	1.27586e-05	2.89437e-06	1.92958e-06	0.0425286
143	2.96051e-06	6.71613e-07	4.47742e-07	0.00986837
144	3.74228e-06	8.48963e-07	5.65975e-07	0.0124743
145	5.52417e-06	1.2532e-06	8.35465e-07	0.0184139
146	2.36584e-05	5.36708e-06	3.57805e-06	0.0788613
147	1.53643e-05	3.48549e-06	2.32366e-06	0.0512142
148	9.7944e-06	2.22193e-06	1.48129e-06	0.032648
149	8.88973e-06	2.0167e-06	1.34447e-06	0.0296324
150	1.16817e-05	2.65008e-06	1.76672e-06	0.0389391
151	1.12565e-05	2.55362e-06	1.70241e-06	0.0375217
152	7.41635e-06	1.68245e-06	1.12164e-06	0.0247212
153	5.22672e-06	1.18572e-06	7.9048e-07	0.0174224
154	2.71587e-06	6.16114e-07	4.10743e-07	0.0090529
155	8.09326e-06	1.83601e-06	1.22401e-06	0.0269775
156	1.26866e-05	2.87804e-06	1.91869e-06	0.0422886
157	9.14008e-06	2.07349e-06	1.38233e-06	0.0304669
158	6.56784e-06	1.48996e-06	9.93308e-07	0.0218928
159	1.24683e-05	2.82851e-06	1.88568e-06	0.0415609
160	3.83373e-06	8.6971e-07	5.79807e-07	0.0127791
161	2.44366e-05	5.54362e-06	3.69575e-06	0.0814554
162	9.35929e-06	2.12322e-06	1.41548e-06	0.0311976
163	8.01468e-06	1.81819e-06	1.21212e-06	0.0267156
164	4.42659e-06	1.0042e-06	6.69468e-07	0.0147553
165	7.14369e-06	1.6206e-06	1.0804e-06	0.0238123
166	5.92118e-06	1.34326e-06	8.95508e-07	0.0197373
167	8.21685e-06	1.86405e-06	1.2427e-06	0.0273895
168	1.11278e-05	2.52443e-06	1.68295e-06	0.0370928
169	1.44401e-05	3.27583e-06	2.18389e-06	0.0481335
170	4.85807e-06	1.10209e-06	7.34725e-07	0.0161936
171	5.12204e-06	1.16197e-06	7.74647e-07	0.0170735
172	4.36712e-06	9.90712e-07	6.60475e-07	0.0145571
173	1.13618e-05	2.57751e-06	1.71834e-06	0.0378727
174	6.63243e-06	1.50461e-06	1.00308e-06	0.0221081
175	4.13527e-06	9.38116e-07	6.2541e-07	0.0137842
176	7.71585e-06	1.7504e-06	1.16693e-06	0.0257195
177	8.91694e-06	2.02287e-06	1.34858e-06	0.0297231
178	4.71759e-06	1.07022e-06	7.1348e-07	0.0157253
179	3.7195e-06	8.43796e-07	5.62531e-07	0.0123983
180	2.3322e-06	5.29076e-07	3.52717e-07	0.00777399
181	6.96533e-06	1.58014e-06	1.05342e-06	0.0232178
182	5.05518e-06	1.1468e-06	7.64536e-07	0.0168506
183	1.48155e-06	3.361e-07	2.24067e-07	0.0049385
184	1.69662e-06	3.8489e-07	2.56593e-07	0.00565539
185	6.02441e-06	1.36668e-06	9.1112e-07	0.0200814
186	4.93795e-06	1.12021e-06	7.46807e-07	0.0164598
187	3.719e-06	8.43681e-07	5.62454e-07	0.0123967
188	4.60949e-06	1.0457e-06	6.97131e-07	0.015365
189	5.41073e-06	1.22746e-06	8.18308e-07	0.0180358
190	5.98816e-06	1.35846e-06	9.05638e-07	0.0199605
191	2.43593e-06	5.52609e-07	3.68406e-07	0.00811978
192	1.00801e-05	2.28674e-06	1.52449e-06	0.0336002
193	8.12399e-06	1.84299e-06	1.22866e-06	0.02708
194	2.08947e-05	4.74012e-06	3.16008e-06	0.0696491
195	1.472e-05	3.33934e-06	2.22623e-06	0.0490667
196	6.94413e-06	1.57532e-06	1.05022e-06	0.0231471
197	6.10685e-06	1.38538e-06	9.23589e-07	0.0203562
198	4.78367e-06	1.08521e-06	7.23473e-07	0.0159456
199	6.35705e-06	1.44214e-06	9.61428e-07	0.0211902
200	1.103e-05	2.50224e-06	1.66816e-06	0.0367668
201	1.1123e-05	2.52333e-06	1.68222e-06	0.0370766
202	4.40475e-06	9.9925e-07	6.66167e-07	0.0146825
203	4.33824e-06	9.8416e-07	6.56107e-07	0.0144608
204	4.3363e-06	9.83721e-07	6.55814e-07	0.0144543
205	7.09142e-06	1.60874e-06	1.07249e-06	0.0236381
206	1.05204e-05	2.38662e-06	1.59108e-06	0.0350679
207	7.45742e-06	1.69177e-06	1.12785e-06	0.0248581
208	1.02626e-05	2.32814e-06	1.55209e-06	0.0342086
209	1.84208e-05	4.17888e-06	2.78592e-06	0.0614026
210	8.04527e-06	1.82513e-06	1.21675e-06	0.0268176
211	4.23811e-06	9.61446e-07	6.40964e-07	0.014127
212	1.10582e-05	2.50862e-06	1.67241e-06	0.0368605
213	3.5793e-06	8.11991e-07	5.41327e-07	0.011931
214	3.64859e-06	8.27709e-07	5.51806e-07	0.012162
215	4.73514e-06	1.0742e-06	7.16134e-07	0.0157838
216	1.57345e-05	3.56949e-06	2.37966e-06	0.0524484
217	1.13414e-05	2.57287e-06	1.71525e-06	0.0378046
218	4.90076e-06	1.11177e-06	7.41182e-07	0.0163359
219	6.10087e-06	1.38403e-06	9.22684e-07	0.0203362
220	1.84156e-06	4.17771e-07	2.78514e-07	0.00613854
221	5.60318e-06	1.27112e-06	8.47414e-07	0.0186773
222	5.71203e-06	1.29582e-06	8.63877e-07	0.0190401
223	8.16493e-06	1.85227e-06	1.23485e-06	0.0272164
224	5.75183e-06	1.30484e-06	8.69896e-07	0.0191728
225	1.13418e-05	2.57298e-06	1.71532e-06	0.0378061
226	5.09042e-06	1.1548e-06	7.69865e-07	0.0169681
227	4.82392e-06	1.09434e-06	7.29561e-07	0.0160797
228	9.34439e-06	2.11984e-06	1.41323e-06	0.031148
229	1.40582e-05	3.18921e-06	2.12614e-06	0.0468607
230	5.23588e-06	1.1878e-06	7.91865e-07	0.0174529
231	8.56315e-06	1.94261e-06	1.29507e-06	0.0285438
232	1.09707e-05	2.48877e-06	1.65918e-06	0.0365689
233	5.03887e-06	1.1431e-06	7.62069e-07	0.0167962
234	5.69579e-06	1.29213e-06	8.6142e-07	0.018986
235	2.54267e-06	5.76822e-07	3.84548e-07	0.00847556
236	9.81775e-06	2.22723e-06	1.48482e-06	0.0327258
237	6.97023e-06	1.58125e-06	1.05416e-06	0.0232341
238	9.54239e-06	2.16476e-06	1.44317e-06	0.031808
239	1.17421e-05	2.66379e-06	1.77586e-06	0.0391404
240	5.53554e-06	1.25578e-06	8.37184e-07	0.0184518
241	7.08914e-06	1.60822e-06	1.07215e-06	0.0236305
242	7.88544e-06	1.78887e-06	1.19258e-06	0.0262848
243	1.3346e-05	3.02764e-06	2.01843e-06	0.0444867
244	6.96855e-06	1.58087e-06	1.05391e-06	0.0232285
245	5.95672e-06	1.35132e-06	9.00882e-07	0.0198557
246	2.3012e-06	5.22043e-07	3.48029e-07	0.00767066
247	5.23322e-06	1.18719e-06	7.91462e-07	0.0174441
248	6.59273e-06	1.49561e-06	9.97071e-07	0.0219758
249	7.19091e-06	1.63131e-06	1.08754e-06	0.0239697
250	8.77691e-06	1.99111e-06	1.3274e-06	0.0292564
251	5.08874e-06	1.15442e-06	7.69612e-07	0.0169625
252	4.75224e-06	1.07808e-06	7.18719e-07	0.0158408
253	3.6921e-06	8.37579e-07	5.58386e-07	0.012307
254	3.57116e-06	8.10143e-07	5.40095e-07	0.0119039
255	5.24207e-06	1.1892e-06	7.928e-07	0.0174736
256	1.06933e-05	2.42586e-06	1.61724e-06	0.0356444
257	1.11377e-05	2.52667e-06	1.68445e-06	0.0371258
258	1.14285e-05	2.59263e-06	1.72842e-06	0.0380949
259	7.42845e-06	1.6852e-06	1.12347e-06	0.0247615
260	6.5533e-06	1.48666e-06	9.91109e-07	0.0218443
261	1.29955e-06	2.94813e-07	1.96542e-07	0.00433184
262	4.12009e-06	9.34671e-07	6.23114e-07	0.0137336
263	7.66215e-06	1.73821e-06	1.15881e-06	0.0255405
264	6.77401e-06	1.53673e-06	1.02449e-06	0.02258
265	3.09714e-06	7.02609e-07	4.68406e-07	0.0103238
266	6.75679e-06	1.53283e-06	1.02188e-06	0.0225226
267	9.38816e-06	2.12977e-06	1.41985e-06	0.0312939
268	1.38042e-05	3.13158e-06	2.08772e-06	0.0460139
269	1.06423e-05	2.41428e-06	1.60952e-06	0.0354743
270	1.18259e-05	2.68279e-06	1.78853e-06	0.0394197
271	9.73743e-06	2.209e-06	1.47267e-06	0.0324581
272	1.22918e-05	2.78849e-06	1.85899e-06	0.0409727
273	1.04213e-05	2.36415e-06	1.5761e-06	0.0347376
274	7.317e-06	1.65991e-06	1.10661e-06	0.02439
275	6.73509e-06	1.5279e-06	1.0186e-06	0.0224503
276	8.85806e-06	2.00951e-06	1.33968e-06	0.0295269
277	2.11391e-05	4.79556e-06	3.19704e-06	0.0704638
278	9.62539e-06	2.18359e-06	1.45573e-06	0.0320846
279	1.5986e-06	3.62655e-07	2.4177e-07	0.00532868
280	5.48294e-06	1.24384e-06	8.2923e-07	0.0182765
281	7.63972e-06	1.73313e-06	1.15542e-06	0.0254657
282	1.2033e-05	2.72978e-06	1.81985e-06	0.0401101
283	5.51133e-06	1.25028e-06	8.33523e-07	0.0183711
284	5.02994e-06	1.14108e-06	7.60718e-07	0.0167665
285	3.87676e-06	8.79471e-07	5.86314e-07	0.0129225
286	1.46841e-05	3.3312e-06	2.2208e-06	0.048947
287	1.2175e-05	2.76198e-06	1.84132e-06	0.0405832
288	3.55065e-06	8.0549e-07	5.36993e-07	0.0118355
289	7.11791e-06	1.61475e-06	1.0765e-06	0.0237264
290	9.77607e-06	2.21777e-06	1.47851e-06	0.0325869
291	9.08012e-06	2.05989e-06	1.37326e-06	0.0302671
292	8.22224e-06	1.86527e-06	1.24352e-06	0.0274075
293	6.46629e-06	1.46692e-06	9.77949e-07	0.0215543
294	1.51504e-05	3.43697e-06	2.29132e-06	0.0505013
295	5.95306e-06	1.35049e-06	9.0033e-07	0.0198435
296	4.40211e-06	9.98649e-07	6.65766e-07	0.0146737
297	4.82189e-06	1.09388e-06	7.29253e-07	0.016073
298	1.27399e-05	2.89015e-06	1.92677e-06	0.0424665
299	1.33095e-05	3.01935e-06	2.0129e-06	0.0443649
300	1.28793e-05	2.92176e-06	1.94784e-06	0.042931
301	5.54532e-06	1.258e-06	8.38664e-07	0.0184844
302	7.6601e-06	1.73775e-06	1.1585e-06	0.0255337
303	3.92503e-06	8.90422e-07	5.93614e-07	0.0130834
304	5.29906e-06	1.20213e-06	8.0142e-07	0.0176635
305	6.34869e-06	1.44025e-06	9.60163e-07	0.0211623
306	2.57771e-06	5.84772e-07	3.89848e-07	0.00859237
307	8.15699e-06	1.85047e-06	1.23365e-06	0.02719
308	2.25492e-05	5.11545e-06	3.4103e-06	0.0751641
309	1.00891e-05	2.28877e-06	1.52585e-06	0.0336302
310	4.95669e-06	1.12446e-06	7.4964e-07	0.0165223
311	1.068e-05	2.42283e-06	1.61522e-06	0.0356
312	2.828e-06	6.41551e-07	4.27701e-07	0.00942665
313	6.25975e-06	1.42007e-06	9.46712e-07	0.0208658
314	8.73691e-06	1.98203e-06	1.32135e-06	0.029123
315	4.76519e-06	1.08102e-06	7.20678e-07	0.015884
316	5.56549e-06	1.26257e-06	8.41714e-07	0.0185516
317	7.74347e-07	1.75666e-07	1.17111e-07	0.00258116
318	6.13279e-06	1.39127e-06	9.27511e-07	0.0204426
319	4.80064e-06	1.08906e-06	7.26039e-07	0.0160021
320	6.26981e-06	1.42235e-06	9.48234e-07	0.0208994
321	7.45021e-06	1.69013e-06	1.12676e-06	0.024834
322	1.29571e-05	2.93941e-06	1.95961e-06	0.0431903
323	6.33084e-06	1.4362e-06	9.57464e-07	0.0211028
324	1.56188e-05	3.54323e-06	2.36215e-06	0.0520626
325	9.44402e-06	2.14244e-06	1.4283e-06	0.0314801
326	4.33627e-06	9.83714e-07	6.55809e-07	0.0144542
327	9.27732e-06	2.10463e-06	1.40308e-06	0.0309244
328	1.44157e-05	3.2703e-06	2.1802e-06	0.0480523
329	7.37124e-06	1.67222e-06	1.11481e-06	0.0245708
330	7.15651e-06	1.62351e-06	1.08234e-06	0.023855
331	7.31888e-06	1.66034e-06	1.10689e-06	0.0243963
332	8.53002e-06	1.9351e-06	1.29006e-06	0.0284334
333	4.98295e-06	1.13042e-06	7.53611e-07	0.0166098
334	9.80236e-06	2.22374e-06	1.48249e-06	0.0326745
335	7.46695e-06	1.69393e-06	1.12929e-06	0.0248898
336	9.53944e-06	2.16409e-06	1.44273e-06	0.0317981
337	8.66472e-06	1.96565e-06	1.31044e-06	0.0288824
338	1.07342e-05	2.43513e-06	1.62342e-06	0.0357807
339	3.75196e-06	8.51159e-07	5.67439e-07	0.0125065
340	2.63244e-05	5.97189e-06	3.98126e-06	0.0877481
341	5.77745e-06	1.31066e-06	8.7377e-07	0.0192582
342	7.48551e-06	1.69814e-06	1.13209e-06	0.0249517
343	9.2727e-06	2.10358e-06	1.40239e-06	0.030909
344	5.12855e-06	1.16345e-06	7.75632e-07	0.0170952
345	6.32427e-06	1.43471e-06	9.56471e-07	0.0210809
346	7.73145e-06	1.75394e-06	1.16929e-06	0.0257715
347	9.01181e-06	2.04439e-06	1.36293e-06	0.0300394
348	1.09805e-05	2.49102e-06	1.66068e-06	0.0366018
349	3.45012e-06	7.82684e-07	5.21789e-07	0.0115004
350	2.88303e-06	6.54036e-07	4.36024e-07	0.00961011
351	2.09822e-05	4.75996e-06	3.17331e-06	0.0699406
352	1.59102e-05	3.60934e-06	2.40623e-06	0.053034
353	1.31151e-05	2.97526e-06	1.98351e-06	0.0437172
354	2.1636e-05	4.90827e-06	3.27218e-06	0.0721199
355	2.59431e-06	5.88538e-07	3.92358e-07	0.0086477
356	3.67318e-06	8.33288e-07	5.55525e-07	0.0122439
357	4.29846e-06	9.75136e-07	6.50091e-07	0.0143282
358	2.0234e-05	4.59023e-06	3.06015e-06	0.0674467
359	9.36603e-06	2.12475e-06	1.4165e-06	0.0312201
360	2.00331e-05	4.54466e-06	3.02977e-06	0.0667771
361	7.43148e-06	1.68588e-06	1.12392e-06	0.0247716
362	1.00771e-05	2.28606e-06	1.52404e-06	0.0335903
363	2.92065e-06	6.62571e-07	4.41714e-07	0.00973551
364	6.9014e-06	1.56563e-06	1.04375e-06	0.0230047
365	3.95371e-06	8.96927e-07	5.97951e-07	0.013179
366	4.19183e-06	9.50946e-07	6.33964e-07	0.0139728
367	6.52793e-06	1.48091e-06	9.87272e-07	0.0217598
368	1.10806e-05	2.51372e-06	1.67581e-06	0.0369354
369	1.36312e-05	3.09233e-06	2.06155e-06	0.0454372
370	5.73591e-06	1.30123e-06	8.67488e-07	0.0191197
371	1.23294e-05	2.79701e-06	1.86467e-06	0.041098
372	7.41819e-06	1.68287e-06	1.12191e-06	0.0247273
373	6.43915e-06	1.46077e-06	9.73845e-07	0.0214638
374	4.8185e-06	1.09311e-06	7.2874e-07	0.0160617
375	1.00286e-05	2.27507e-06	1.51671e-06	0.0334288
376	1.88265e-05	4.27092e-06	2.84728e-06	0.062755
377	1.721e-06	3.90421e-07	2.60281e-07	0.00573666
378	6.2667e-06	1.42164e-06	9.47763e-07	0.020889
379	1.3202e-05	2.99497e-06	1.99665e-06	0.0440067
380	5.7071e-06	1.2947e-06	8.63132e-07	0.0190237
381	4.67865e-06	1.06138e-06	7.0759e-07	0.0155955
382	2.87449e-06	6.52099e-07	4.34732e-07	0.00958163
383	7.20974e-06	1.63558e-06	1.09039e-06	0.0240325
384	9.85725e-06	2.23619e-06	1.49079e-06	0.0328575
385	8.41977e-06	1.91008e-06	1.27339e-06	0.0280659
386	4.34232e-06	9.85085e-07	6.56724e-07	0.0144744
387	8.4127e-06	1.90848e-06	1.27232e-06	0.0280423
388	7.27234e-06	1.64978e-06	1.09985e-06	0.0242411
389	1.68264e-05	3.81719e-06	2.54479e-06	0.056088
390	3.95692e-06	8.97655e-07	5.98436e-07	0.0131897
391	1.00962e-05	2.29039e-06	1.52693e-06	0.033654
392	1.4467e-05	3.28193e-06	2.18795e-06	0.0482232
393	3.17386e-06	7.20012e-07	4.80008e-07	0.0105795
394	1.20298e-05	2.72905e-06	1.81936e-06	0.0400993
395	1.43153e-05	3.24752e-06	2.16501e-06	0.0477175
396	7.57408e-06	1.71823e-06	1.14549e-06	0.0252469
397	8.20349e-06	1.86102e-06	1.24068e-06	0.027345
398	1.33303e-05	3.02408e-06	2.01606e-06	0.0444345
399	5.35077e-06	1.21386e-06	8.0924e-07	0.0178359
400	4.76757e-06	1.08156e-06	7.21038e-07	0.0158919
401	5.17614e-06	1.17424e-06	7.8283e-07	0.0172538
402	1.14888e-05	2.60632e-06	1.73755e-06	0.038296
403	2.81376e-06	6.38321e-07	4.25547e-07	0.00937919
404	8.39111e-06	1.90358e-06	1.26906e-06	0.0279704
405	5.08569e-06	1.15372e-06	7.69149e-07	0.0169523
406	4.09274e-06	9.28467e-07	6.18978e-07	0.0136425
407	6.69521e-06	1.51886e-06	1.01257e-06	0.0223174
408	4.87532e-06	1.106e-06	7.37334e-07	0.0162511
409	3.02448e-06	6.86124e-07	4.57416e-07	0.0100816
410	6.48562e-06	1.47131e-06	9.80872e-07	0.0216187
411	7.69778e-06	1.7463e-06	1.1642e-06	0.0256593
412	5.58396e-06	1.26676e-06	8.44507e-07	0.0186132
413	6.5166e-06	1.47834e-06	9.85558e-07	0.021722
414	2.91809e-06	6.6199e-07	4.41327e-07	0.00972698
415	3.81443e-06	8.65331e-07	5.76887e-07	0.0127148
416	1.72567e-05	3.9148e-06	2.60987e-06	0.0575223
417	2.91222e-06	6.60659e-07	4.40439e-07	0.00970741
418	1.25585e-05	2.84899e-06	1.89933e-06	0.0418617
419	1.68909e-05	3.83182e-06	2.55454e-06	0.0563029
420	9.64315e-06	2.18762e-06	1.45841e-06	0.0321438
421	1.08437e-05	2.45997e-06	1.63998e-06	0.0361457
422	8.40853e-06	1.90753e-06	1.27169e-06	0.0280284
423	1.21569e-05	2.75787e-06	1.83858e-06	0.0405229
424	9.33785e-06	2.11836e-06	1.41224e-06	0.0311262
425	5.89753e-06	1.3379e-06	8.91932e-07	0.0196584
426	5.78057e-06	1.31136e-06	8.74242e-07	0.0192686
427	6.8874e-06	1.56245e-06	1.04164e-06	0.022958
428	2.10172e-05	4.76789e-06	3.17859e-06	0.0700572
429	9.82977e-06	2.22995e-06	1.48664e-06	0.0327659
430	5.18238e-06	1.17566e-06	7.83774e-07	0.0172746
431	1.78617e-05	4.05205e-06	2.70137e-06	0.0595389
432	3.28253e-06	7.44665e-07	4.96443e-07	0.0109418
433	6.49237e-06	1.47284e-06	9.81894e-07	0.0216412
434	6.08982e-06	1.38152e-06	9.21013e-07	0.0202994
435	8.63391e-06	1.95866e-06	1.30578e-06	0.0287797
436	3.89023e-06	8.82526e-07	5.88351e-07	0.0129674
437	1.68279e-05	3.81752e-06	2.54501e-06	0.0560929
438	3.92381e-06	8.90145e-07	5.9343e-07	0.0130794
439	7.35613e-06	1.66879e-06	1.11253e-06	0.0245204
440	1.32633e-05	3.00888e-06	2.00592e-06	0.0442111
441	7.31058e-06	1.65846e-06	1.10564e-06	0.0243686
442	9.03363e-06	2.04934e-06	1.36623e-06	0.0301121
443	1.14943e-05	2.60755e-06	1.73837e-06	0.0383142
444	3.77084e-06	8.55443e-07	5.70295e-07	0.0125695
445	1.02619e-05	2.328e-06	1.552e-06	0.0342065
446	5.72489e-06	1.29873e-06	8.65821e-07	0.019083
447	2.59518e-06	5.88735e-07	3.9249e-07	0.00865059
448	5.25213e-06	1.19148e-06	7.94322e-07	0.0175071
449	2.97163e-06	6.74136e-07	4.49424e-07	0.00990544
450	1.73362e-06	3.93283e-07	2.62189e-07	0.00577872
451	6.6031e-06	1.49796e-06	9.9864e-07	0.0220103
452	6.07986e-06	1.37926e-06	9.19506e-07	0.0202662
453	7.69045e-06	1.74463e-06	1.16309e-06	0.0256348
454	1.05862e-05	2.40155e-06	1.60103e-06	0.0352872
455	1.9487e-06	4.42076e-07	2.94717e-07	0.00649565
456	2.26382e-06	5.13563e-07	3.42376e-07	0.00754606
457	3.01959e-06	6.85015e-07	4.56676e-07	0.0100653
458	2.8673e-06	6.50468e-07	4.33645e-07	0.00955767
459	5.51042e-06	1.25008e-06	8.33385e-07	0.0183681
460	2.19284e-05	4.9746e-06	3.3164e-06	0.0730945
461	3.5505e-06	8.05456e-07	5.36971e-07	0.011835
462	2.74005e-06	6.21601e-07	4.144e-07	0.00913351
463	1.50384e-06	3.41156e-07	2.27438e-07	0.00501279
464	2.37581e-06	5.3897e-07	3.59313e-07	0.00791938
465	1.55823e-05	3.53496e-06	2.35664e-06	0.0519411
466	1.26648e-05	2.87311e-06	1.91541e-06	0.0422161
467	5.56566e-06	1.26261e-06	8.41739e-07	0.0185522
468	1.40974e-05	3.1981e-06	2.13207e-06	0.0469914
469	5.78287e-06	1.31189e-06	8.74591e-07	0.0192762
470	7.12091e-06	1.61543e-06	1.07695e-06	0.0237364
471	1.30688e-05	2.96475e-06	1.9765e-06	0.0435626
472	5.78115e-06	1.3115e-06	8.7433e-07	0.0192705
473	9.91181e-06	2.24856e-06	1.49904e-06	0.0330394
474	1.31275e-05	2.97806e-06	1.98538e-06	0.0437583
475	8.53738e-06	1.93676e-06	1.29118e-06	0.0284579
476	7.55289e-06	1.71343e-06	1.14229e-06	0.0251763
477	1.0854e-06	2.46232e-07	1.64155e-07	0.00361802
478	8.42602e-06	1.9115e-06	1.27434e-06	0.0280867
479	1.08251e-05	2.45575e-06	1.63717e-06	0.0360836
480	7.15356e-06	1.62284e-06	1.08189e-06	0.0238452
481	9.0251e-06	2.04741e-06	1.36494e-06	0.0300837
482	9.53535e-06	2.16316e-06	1.44211e-06	0.0317845
483	1.09145e-05	2.47604e-06	1.65069e-06	0.0363818
484	7.62604e-06	1.73002e-06	1.15335e-06	0.0254201
485	5.94092e-06	1.34774e-06	8.98493e-07	0.0198031
486	2.02772e-06	4.60003e-07	3.06668e-07	0.00675906
487	7.3808e-06	1.67439e-06	1.11626e-06	0.0246027
488	4.36515e-06	9.90266e-07	6.60178e-07	0.0145505
489	5.48479e-06	1.24426e-06	8.29509e-07	0.0182826
490	4.9691e-06	1.12728e-06	7.51518e-07	0.0165637
491	2.7647e-06	6.27191e-07	4.18127e-07	0.00921565
492	5.25698e-06	1.19258e-06	7.95055e-07	0.0175233
493	7.19e-06	1.6311e-06	1.0874e-06	0.0239667
494	1.20218e-05	2.72722e-06	1.81815e-06	0.0400725
495	9.31948e-06	2.11419e-06	1.40946e-06	0.0310649
496	4.11937e-06	9.34509e-07	6.23006e-07	0.0137312
497	2.57132e-06	5.83322e-07	3.88881e-07	0.00857106
498	4.73035e-06	1.07311e-06	7.1541e-07	0.0157678
499	4.84099e-06	1.09821e-06	7.32142e-07	0.0161366
500	2.32183e-06	5.26725e-07	3.5115e-07	0.00773945
501	6.30101e-06	1.42943e-06	9.52952e-07	0.0210034
502	4.27583e-06	9.70003e-07	6.46669e-07	0.0142528
503	1.12155e-05	2.54432e-06	1.69621e-06	0.037385
504	7.00191e-06	1.58843e-06	1.05896e-06	0.0233397
505	2.18841e-06	4.96456e-07	3.30971e-07	0.0072947
506	6.05514e-06	1.37365e-06	9.15768e-07	0.0201838
507	1.50898e-05	3.42322e-06	2.28215e-06	0.0502992
508	4.47035e-06	1.01413e-06	6.76088e-07	0.0149012
509	3.11615e-06	7.0692e-07	4.7128e-07	0.0103872
510	2.69035e-06	6.10326e-07	4.06884e-07	0.00896784
511	3.76791e-06	8.54778e-07	5.69852e-07	0.0125597
512	7.89012e-06	1.78993e-06	1.19329e-06	0.0263004
513	1.6163e-05	3.6667e-06	2.44446e-06	0.0538767
514	8.78238e-06	1.99235e-06	1.32823e-06	0.0292746
515	6.40167e-06	1.45226e-06	9.68177e-07	0.0213389
516	8.9797e-06	2.03711e-06	1.35807e-06	0.0299323
517	3.17953e-06	7.21299e-07	4.80866e-07	0.0105984
518	2.31552e-06	5.25291e-07	3.50194e-07	0.00771838
519	3.60234e-06	8.17216e-07	5.44811e-07	0.0120078
520	3.82074e-06	8.66762e-07	5.77841e-07	0.0127358
521	7.26937e-06	1.64911e-06	1.09941e-06	0.0242312
522	4.39752e-06	9.9761e-07	6.65073e-07	0.0146584
523	1.80046e-05	4.08448e-06	2.72299e-06	0.0600154
524	5.08026e-06	1.15249e-06	7.68329e-07	0.0169342
525	4.17267e-06	9.466e-07	6.31067e-07	0.0139089
526	1.07298e-05	2.43414e-06	1.62276e-06	0.0357661
527	7.05304e-06	1.60003e-06	1.06669e-06	0.0235101
528	1.15865e-05	2.62848e-06	1.75232e-06	0.0386217
529	3.25082e-06	7.37472e-07	4.91648e-07	0.0108361
530	1.44257e-05	3.27257e-06	2.18171e-06	0.0480856
531	2.94058e-06	6.67092e-07	4.44728e-07	0.00980195
532	9.88341e-06	2.24212e-06	1.49475e-06	0.0329447
533	7.9667e-06	1.8073e-06	1.20487e-06	0.0265557
534	6.00403e-06	1.36206e-06	9.08039e-07	0.0200134
535	7.12062e-06	1.61536e-06	1.07691e-06	0.0237354
536	2.03322e-06	4.6125e-07	3.075e-07	0.00677739
537	1.50169e-05	3.40668e-06	2.27112e-06	0.0500562
538	2.4859e-06	5.63945e-07	3.75963e-07	0.00828634
539	8.09263e-06	1.83587e-06	1.22391e-06	0.0269754
540	3.51575e-06	7.97574e-07	5.31716e-07	0.0117192
541	1.2593e-05	2.85682e-06	1.90455e-06	0.0419768
542	9.35526e-06	2.12231e-06	1.41487e-06	0.0311842
543	4.51069e-06	1.02328e-06	6.82188e-07	0.0150356
544	6.92988e-06	1.57209e-06	1.04806e-06	0.0230996
545	1.05379e-05	2.39061e-06	1.59374e-06	0.0351265
546	8.3032e-06	1.88364e-06	1.25576e-06	0.0276773
547	6.35438e-06	1.44154e-06	9.61024e-07	0.0211813
548	1.29268e-05	2.93253e-06	1.95502e-06	0.0430893
549	4.27348e-06	9.6947e-07	6.46313e-07	0.0142449
550	1.77143e-05	4.01861e-06	2.67907e-06	0.0590475
551	4.87261e-06	1.10539e-06	7.36925e-07	0.016242
552	6.83442e-06	1.55044e-06	1.03362e-06	0.0227814
553	3.15638e-06	7.16047e-07	4.77365e-07	0.0105213
554	4.9182e-06	1.11573e-06	7.43819e-07	0.016394
555	1.0542e-05	2.39154e-06	1.59436e-06	0.0351401
556	3.21486e-06	7.29315e-07	4.8621e-07	0.0107162
557	5.78228e-06	1.31175e-06	8.74501e-07	0.0192743
558	8.01776e-06	1.81889e-06	1.21259e-06	0.0267259
559	1.00359e-05	2.27671e-06	1.51781e-06	0.033453
560	2.33564e-05	5.29856e-06	3.53238e-06	0.0778546
561	2.16974e-05	4.92222e-06	3.28148e-06	0.0723247
562	8.05531e-06	1.8274e-06	1.21827e-06	0.026851
563	8.57309e-07	1.94487e-07	1.29658e-07	0.0028577
564	2.41806e-06	5.48555e-07	3.65703e-07	0.00806021
565	8.74166e-06	1.98311e-06	1.32207e-06	0.0291389
566	6.82538e-06	1.54839e-06	1.03226e-06	0.0227513
567	8.95243e-06	2.03092e-06	1.35395e-06	0.0298414
568	6.93429e-06	1.57309e-06	1.04873e-06	0.0231143
569	1.39454e-05	3.16362e-06	2.10908e-06	0.0464848
570	1.53255e-05	3.4767e-06	2.3178e-06	0.0510849
571	1.11473e-05	2.52884e-06	1.6859e-06	0.0371577
572	5.9322e-06	1.34576e-06	8.97174e-07	0.019774
573	2.27585e-05	5.16293e-06	3.44196e-06	0.0758617
574	6.48143e-06	1.47036e-06	9.80239e-07	0.0216048
575	6.15088e-06	1.39537e-06	9.30248e-07	0.0205029
576	5.09226e-06	1.15521e-06	7.70143e-07	0.0169742
577	1.43196e-05	3.24851e-06	2.16568e-06	0.0477321
578	1.04429e-05	2.36904e-06	1.57936e-06	0.0348096
579	9.12668e-06	2.07045e-06	1.3803e-06	0.0304223
580	6.96159e-06	1.57929e-06	1.05286e-06	0.0232053
581	8.18701e-06	1.85728e-06	1.23819e-06	0.02729
582	4.99708e-06	1.13362e-06	7.55748e-07	0.0166569
583	2.95263e-05	6.69826e-06	4.46551e-06	0.0984211
584	8.80267e-06	1.99695e-06	1.3313e-06	0.0293422
585	1.07915e-05	2.44813e-06	1.63208e-06	0.0359716
586	9.02539e-06	2.04747e-06	1.36498e-06	0.0300846
587	5.51228e-06	1.2505e-06	8.33667e-07	0.0183743
588	1.06944e-05	2.4261e-06	1.6174e-06	0.035648
589	2.94485e-06	6.68061e-07	4.45374e-07	0.00981618
590	2.4286e-06	5.50945e-07	3.67296e-07	0.00809533
591	5.54236e-06	1.25732e-06	8.38216e-07	0.0184745
592	1.053e-05	2.3888e-06	1.59253e-06	0.0350999
593	5.00607e-06	1.13566e-06	7.57109e-07	0.0166869
594	1.19596e-05	2.71313e-06	1.80875e-06	0.0398654
595	3.95297e-06	8.9676e-07	5.9784e-07	0.0131766
596	8.91163e-06	2.02167e-06	1.34778e-06	0.0297054
597	5.51702e-06	1.25158e-06	8.34383e-07	0.0183901
598	6.82648e-06	1.54864e-06	1.03242e-06	0.0227549
599	1.11236e-05	2.52348e-06	1.68232e-06	0.0370788
600	3.58238e-06	8.12688e-07	5.41792e-07	0.0119413
601	1.0076e-05	2.28581e-06	1.52388e-06	0.0335867
602	2.69245e-06	6.10801e-07	4.072e-07	0.00897482
603	7.24852e-06	1.64438e-06	1.09625e-06	0.0241617
604	6.11586e-06	1.38743e-06	9.24952e-07	0.0203862
605	5.527e-06	1.25384e-06	8.35893e-07	0.0184233
606	7.7223e-06	1.75186e-06	1.16791e-06	0.025741
607	6.70383e-06	1.52081e-06	1.01388e-06	0.0223461
608	1.30246e-05	2.95471e-06	1.96981e-06	0.0434152
609	7.73689e-06	1.75517e-06	1.17011e-06	0.0257896
610	1.35507e-05	3.07408e-06	2.04939e-06	0.0451692
611	5.16678e-06	1.17212e-06	7.81413e-07	0.0172226
612	9.38393e-06	2.12881e-06	1.41921e-06	0.0312798
613	5.49473e-06	1.24652e-06	8.31012e-07	0.0183158
614	1.12282e-05	2.54719e-06	1.69813e-06	0.0374272
615	4.18753e-06	9.4997e-07	6.33314e-07	0.0139584
616	3.22707e-06	7.32083e-07	4.88056e-07	0.0107569
617	8.49248e-06	1.92658e-06	1.28439e-06	0.0283083
618	7.98424e-06	1.81128e-06	1.20752e-06	0.0266141
619	1.25774e-05	2.85328e-06	1.90219e-06	0.0419248
620	1.70076e-05	3.85829e-06	2.5722e-06	0.056692
621	3.18235e-06	7.2194e-07	4.81293e-07	0.0106078
622	8.16725e-06	1.8528e-06	1.2352e-06	0.0272242
623	7.90253e-06	1.79275e-06	1.19516e-06	0.0263418
624	6.70459e-06	1.52098e-06	1.01399e-06	0.0223486
625	8.75073e-07	1.98517e-07	1.32344e-07	0.00291691
626	8.04873e-06	1.82591e-06	1.21727e-06	0.0268291
627	1.18714e-05	2.69311e-06	1.79541e-06	0.0395714
628	9.98462e-06	2.26508e-06	1.51005e-06	0.0332821
629	4.95054e-06	1.12306e-06	7.4871e-07	0.0165018
630	8.59611e-06	1.95009e-06	1.30006e-06	0.0286537
631	7.69503e-06	1.74567e-06	1.16378e-06	0.0256501
632	7.43665e-06	1.68706e-06	1.1247e-06	0.0247888
633	4.63174e-06	1.05074e-06	7.00496e-07	0.0154391
634	4.52477e-06	1.02648e-06	6.84318e-07	0.0150826
635	1.29046e-05	2.92751e-06	1.95167e-06	0.0430155
636	7.14935e-06	1.62188e-06	1.08125e-06	0.0238312
637	7.03704e-06	1.5964e-06	1.06427e-06	0.0234568
638	1.11337e-05	2.52576e-06	1.68384e-06	0.0371123
639	2.70743e-06	6.14201e-07	4.09467e-07	0.00902478
640	4.5993e-06	1.04338e-06	6.9559e-07	0.015331
641	1.1095e-06	2.51698e-07	1.67799e-07	0.00369834
642	1.12298e-05	2.54756e-06	1.69837e-06	0.0374327
643	6.28417e-06	1.42561e-06	9.50407e-07	0.0209472
644	4.51304e-06	1.02381e-06	6.82543e-07	0.0150435
645	1.08852e-05	2.46938e-06	1.64625e-06	0.0362839
646	6.18788e-06	1.40377e-06	9.35844e-07	0.0206263
647	9.0798e-06	2.05982e-06	1.37321e-06	0.030266
648	5.56699e-06	1.26291e-06	8.41941e-07	0.0185566
649	1.04958e-05	2.38104e-06	1.58736e-06	0.0349858
650	1.59811e-05	3.62542e-06	2.41695e-06	0.0532703
651	7.69102e-06	1.74476e-06	1.16318e-06	0.0256367
652	6.7082e-06	1.5218e-06	1.01454e-06	0.0223607
653	4.652e-06	1.05534e-06	7.03559e-07	0.0155067
654	6.85424e-06	1.55493e-06	1.03662e-06	0.0228475
655	2.29025e-05	5.1956e-06	3.46373e-06	0.0763417
656	5.5682e-06	1.26319e-06	8.42124e-07	0.0185607
657	4.47661e-06	1.01555e-06	6.77034e-07	0.014922
658	6.97823e-06	1.58306e-06	1.05537e-06	0.0232608
659	1.05194e-05	2.3864e-06	1.59093e-06	0.0350647
660	5.94427e-06	1.3485e-06	8.99e-07	0.0198142
661	2.25011e-05	5.10453e-06	3.40302e-06	0.0750036
662	1.32148e-05	2.99787e-06	1.99858e-06	0.0440493
663	8.84428e-06	2.00639e-06	1.33759e-06	0.0294809
664	6.49902e-06	1.47435e-06	9.82899e-07	0.0216634
665	5.00309e-06	1.13499e-06	7.56658e-07	0.016677
666	6.45823e-06	1.4651e-06	9.7673e-07	0.0215274
667	1.3573e-05	3.07913e-06	2.05276e-06	0.0452434
668	8.46103e-06	1.91945e-06	1.27963e-06	0.0282034
669	1.07667e-05	2.44251e-06	1.62834e-06	0.0358892
670	6.25261e-06	1.41845e-06	9.45633e-07	0.020842
671	7.33638e-06	1.66431e-06	1.10954e-06	0.0244546
672	2.73357e-05	6.20129e-06	4.13419e-06	0.0911189
673	2.57188e-06	5.83449e-07	3.88966e-07	0.00857292
674	4.77679e-06	1.08365e-06	7.22432e-07	0.0159226
675	1.0401e-05	2.35954e-06	1.57303e-06	0.03467
676	5.69805e-06	1.29264e-06	8.61763e-07	0.0189935
677	5.25702e-06	1.19259e-06	7.95062e-07	0.0175234
678	1.47614e-06	3.34874e-07	2.23249e-07	0.00492048
679	6.9775e-06	1.5829e-06	1.05526e-06	0.0232583
680	7.62406e-06	1.72957e-06	1.15305e-06	0.0254135
681	1.08541e-05	2.46232e-06	1.64155e-06	0.0361802
682	7.28935e-07	1.65364e-07	1.10243e-07	0.00242978
683	1.66676e-05	3.78115e-06	2.52077e-06	0.0555585
684	1.37594e-05	3.12141e-06	2.08094e-06	0.0458646
685	8.33517e-06	1.89089e-06	1.26059e-06	0.0277839
686	6.45736e-06	1.4649e-06	9.76599e-07	0.0215245
687	6.83e-06	1.54943e-06	1.03296e-06	0.0227667
688	9.72354e-06	2.20585e-06	1.47057e-06	0.0324118
689	9.05729e-06	2.05471e-06	1.36981e-06	0.030191
690	8.67338e-06	1.96762e-06	1.31175e-06	0.0289113
691	5.04436e-06	1.14435e-06	7.629e-07	0.0168145
692	9.73672e-06	2.20885e-06	1.47256e-06	0.0324557
693	9.88427e-06	2.24232e-06	1.49488e-06	0.0329476
694	4.24921e-06	9.63964e-07	6.42643e-07	0.014164
695	3.64979e-05	8.2798e-06	5.51987e-06	0.12166
696	5.04564e-06	1.14464e-06	7.63093e-07	0.0168188
697	7.91673e-06	1.79597e-06	1.19731e-06	0.0263891
698	8.85914e-06	2.00976e-06	1.33984e-06	0.0295305
699	5.7161e-06	1.29674e-06	8.64492e-07	0.0190537
700	7.15555e-06	1.62329e-06	1.08219e-06	0.0238518
701	1.03691e-05	2.3523e-06	1.5682e-06	0.0345636
702	1.10825e-05	2.51414e-06	1.67609e-06	0.0369416
703	1.39123e-05	3.1561e-06	2.10407e-06	0.0463743
704	3.98597e-06	9.04246e-07	6.0283e-07	0.0132866
705	6.95231e-06	1.57718e-06	1.05145e-06	0.0231744
706	8.8487e-06	2.00739e-06	1.33826e-06	0.0294957
707	5.53035e-06	1.2546e-06	8.36399e-07	0.0184345
708	9.31362e-06	2.11286e-06	1.40857e-06	0.0310454
709	1.3719e-05	3.11225e-06	2.07484e-06	0.04573
710	1.20422e-05	2.73186e-06	1.82124e-06	0.0401407
711	7.12572e-06	1.61652e-06	1.07768e-06	0.0237524
712	1.635e-05	3.70912e-06	2.47275e-06	0.0545001
713	2.04591e-05	4.64129e-06	3.09419e-06	0.0681969
714	3.24215e-06	7.35505e-07	4.90337e-07	0.0108072
715	5.76618e-06	1.3081e-06	8.72066e-07	0.0192206
716	8.62965e-06	1.9577e-06	1.30513e-06	0.0287655
717	2.88449e-06	6.54368e-07	4.36245e-07	0.00961497
718	7.58907e-06	1.72164e-06	1.14776e-06	0.0252969
719	6.30914e-06	1.43127e-06	9.54183e-07	0.0210305
720	1.11385e-05	2.52685e-06	1.68456e-06	0.0371283
721	5.85734e-06	1.32878e-06	8.85853e-07	0.0195245
722	9.75074e-06	2.21203e-06	1.47468e-06	0.0325025
723	5.24214e-06	1.18922e-06	7.92811e-07	0.0174738
724	3.11599e-06	7.06886e-07	4.71257e-07	0.0103866
725	2.79857e-06	6.34876e-07	4.2325e-07	0.00932857
726	6.08137e-06	1.3796e-06	9.19735e-07	0.0202712
727	8.50942e-06	1.93042e-06	1.28695e-06	0.0283647
728	6.19351e-06	1.40504e-06	9.36695e-07	0.020645
729	1.09393e-05	2.48166e-06	1.65444e-06	0.0364644
730	8.68329e-06	1.96987e-06	1.31324e-06	0.0289443
731	7.30275e-06	1.65668e-06	1.10445e-06	0.0243425
732	3.70497e-06	8.40499e-07	5.60333e-07	0.0123499
733	6.5173e-06	1.4785e-06	9.85664e-07	0.0217243
734	2.36765e-06	5.37118e-07	3.58079e-07	0.00789216
735	1.46791e-05	3.33006e-06	2.22004e-06	0.0489303
736	1.54326e-06	3.50099e-07	2.33399e-07	0.00514419
737	3.78051e-06	8.57635e-07	5.71757e-07	0.0126017
738	6.22674e-06	1.41258e-06	9.41721e-07	0.0207558
739	8.27788e-06	1.8779e-06	1.25193e-06	0.0275929
740	1.89277e-06	4.29388e-07	2.86258e-07	0.00630922
741	7.57422e-06	1.71827e-06	1.14551e-06	0.0252474
742	6.18158e-06	1.40234e-06	9.34891e-07	0.0206053
743	1.19632e-05	2.71393e-06	1.80929e-06	0.0398773
744	9.90065e-06	2.24603e-06	1.49736e-06	0.0330022
745	7.26906e-06	1.64904e-06	1.09936e-06	0.0242302
746	6.68274e-06	1.51603e-06	1.01068e-06	0.0222758
747	1.07392e-05	2.43627e-06	1.62418e-06	0.0357973
748	8.90834e-06	2.02092e-06	1.34728e-06	0.0296945
749	5.38576e-06	1.2218e-06	8.14533e-07	0.0179525
750	1.33062e-05	3.0186e-06	2.0124e-06	0.0443539
751	8.0224e-06	1.81994e-06	1.21329e-06	0.0267413
752	8.60137e-06	1.95128e-06	1.30086e-06	0.0286712
753	1.85976e-05	4.219e-06	2.81266e-06	0.061992
754	7.5769e-06	1.71887e-06	1.14592e-06	0.0252563
755	6.79637e-06	1.5418e-06	1.02787e-06	0.0226546
756	3.37594e-06	7.65857e-07	5.10571e-07	0.0112531
757	7.19232e-06	1.63163e-06	1.08775e-06	0.0239744
758	1.42641e-05	3.23592e-06	2.15728e-06	0.0475471
759	7.54961e-06	1.71268e-06	1.14179e-06	0.0251654
760	1.33652e-05	3.032e-06	2.02133e-06	0.0445508
761	1.30123e-05	2.95194e-06	1.96796e-06	0.0433744
762	1.2334e-05	2.79806e-06	1.86537e-06	0.0411133
763	1.50281e-05	3.40923e-06	2.27282e-06	0.0500937
764	1.13281e-06	2.56987e-07	1.71324e-07	0.00377604
765	3.28833e-06	7.45981e-07	4.97321e-07	0.0109611
766	8.14602e-06	1.84798e-06	1.23199e-06	0.0271534
767	1.29967e-05	2.94839e-06	1.96559e-06	0.0433223
768	9.81881e-06	2.22747e-06	1.48498e-06	0.0327294
769	1.55305e-05	3.5232e-06	2.3488e-06	0.0517683
770	5.20307e-06	1.18035e-06	7.86903e-07	0.0173436
771	5.73362e-06	1.30071e-06	8.67142e-07	0.0191121
772	5.32615e-06	1.20828e-06	8.05517e-07	0.0177538
773	2.39831e-06	5.44074e-07	3.62716e-07	0.00799438
774	1.10841e-05	2.51451e-06	1.67634e-06	0.036947
775	9.97934e-06	2.26389e-06	1.50926e-06	0.0332645
776	8.05609e-06	1.82758e-06	1.21839e-06	0.0268536
777	1.80379e-05	4.09203e-06	2.72802e-06	0.0601264
778	1.22519e-05	2.77942e-06	1.85295e-06	0.0408395
779	1.31656e-05	2.98672e-06	1.99115e-06	0.0438854
780	7.25757e-06	1.64643e-06	1.09762e-06	0.0241919
781	4.3356e-06	9.83563e-07	6.55708e-07	0.014452
782	4.17312e-06	9.46702e-07	6.31135e-07	0.0139104
783	5.77187e-06	1.30939e-06	8.72926e-07	0.0192396
784	8.06121e-06	1.82874e-06	1.21916e-06	0.0268707
785	5.27417e-06	1.19648e-06	7.97656e-07	0.0175806
786	4.09006e-06	9.2786e-07	6.18573e-07	0.0136335
787	5.02259e-06	1.13941e-06	7.59608e-07	0.016742
788	4.88659e-06	1.10856e-06	7.39039e-07	0.0162886
789	7.46446e-06	1.69337e-06	1.12891e-06	0.0248815
790	1.35479e-05	3.07344e-06	2.04896e-06	0.0451597
791	2.50033e-06	5.67217e-07	3.78145e-07	0.00833442
792	9.74419e-06	2.21054e-06	1.47369e-06	0.0324806
793	6.80708e-06	1.54423e-06	1.02949e-06	0.0226903
794	5.41853e-06	1.22923e-06	8.19488e-07	0.0180618
795	5.43492e-06	1.23295e-06	8.21968e-07	0.0181164
796	7.08825e-06	1.60802e-06	1.07201e-06	0.0236275
797	6.54977e-06	1.48586e-06	9.90575e-07	0.0218326
798	1.30874e-05	2.96897e-06	1.97931e-06	0.0436246
799	4.99126e-06	1.1323e-06	7.54869e-07	0.0166375
800	3.77642e-06	8.56707e-07	5.71138e-07	0.0125881
801	1.22356e-05	2.77574e-06	1.85049e-06	0.0407854
802	1.99504e-05	4.52588e-06	3.01725e-06	0.0665012
803	6.90571e-06	1.56661e-06	1.04441e-06	0.023019
804	1.63715e-05	3.71399e-06	2.47599e-06	0.0545717
805	4.16614e-06	9.45119e-07	6.30079e-07	0.0138871
806	7.73499e-06	1.75474e-06	1.16982e-06	0.0257833
807	4.92899e-06	1.11818e-06	7.4545e-07	0.01643
808	1.01525e-05	2.30318e-06	1.53545e-06	0.0338418
809	2.57695e-06	5.846e-07	3.89733e-07	0.00858984
810	8.73529e-06	1.98166e-06	1.32111e-06	0.0291176
811	5.26883e-06	1.19527e-06	7.96848e-07	0.0175628
812	8.83443e-06	2.00415e-06	1.3361e-06	0.0294481
813	8.42924e-06	1.91223e-06	1.27482e-06	0.0280975
814	3.36387e-06	7.63117e-07	5.08745e-07	0.0112129
815	1.06558e-05	2.41735e-06	1.61157e-06	0.0355194
816	2.29945e-05	5.21647e-06	3.47765e-06	0.0766484
817	8.96459e-06	2.03368e-06	1.35579e-06	0.029882
818	1.55952e-05	3.53788e-06	2.35858e-06	0.0519839
819	4.77744e-06	1.0838e-06	7.22531e-07	0.0159248
820	5.26359e-06	1.19408e-06	7.96055e-07	0.0175453
821	9.19432e-06	2.0858e-06	1.39053e-06	0.0306477
822	4.58964e-06	1.04119e-06	6.94128e-07	0.0152988
823	9.07849e-06	2.05952e-06	1.37301e-06	0.0302616
824	5.48028e-06	1.24324e-06	8.28827e-07	0.0182676
825	5.63817e-06	1.27906e-06	8.52706e-07	0.0187939
826	5.81186e-06	1.31846e-06	8.78974e-07	0.0193729
827	8.01307e-06	1.81782e-06	1.21188e-06	0.0267102
828	9.89568e-06	2.2449e-06	1.4966e-06	0.0329856
829	1.44356e-06	3.27483e-07	2.18322e-07	0.00481188
830	9.64564e-06	2.18818e-06	1.45879e-06	0.0321521
831	9.10976e-06	2.06662e-06	1.37774e-06	0.0303659
832	5.23553e-06	1.18772e-06	7.91812e-07	0.0174518
833	2.16012e-06	4.90038e-07	3.26692e-07	0.00720039
834	2.97572e-06	6.75064e-07	4.50043e-07	0.00991907
835	7.38532e-06	1.67541e-06	1.11694e-06	0.0246177
836	6.23517e-06	1.41449e-06	9.42996e-07	0.0207839
837	5.79513e-06	1.31467e-06	8.76445e-07	0.0193171
838	4.53972e-06	1.02987e-06	6.86579e-07	0.0151324
839	8.97344e-06	2.03569e-06	1.35713e-06	0.0299115
840	7.13057e-06	1.61762e-06	1.07841e-06	0.0237686
841	9.92521e-06	2.2516e-06	1.50107e-06	0.033084
842	1.00249e-05	2.27422e-06	1.51614e-06	0.0334163
843	5.64484e-06	1.28057e-06	8.53714e-07	0.0188161
844	7.73387e-06	1.75448e-06	1.16966e-06	0.0257796
845	6.38681e-06	1.44889e-06	9.65929e-07	0.0212894
846	4.93514e-06	1.11957e-06	7.46381e-07	0.0164505
847	1.6112e-05	3.65513e-06	2.43676e-06	0.0537068
848	4.93422e-06	1.11936e-06	7.46242e-07	0.0164474
849	3.28598e-05	7.45449e-06	4.96966e-06	0.109533
850	1.81389e-06	4.11493e-07	2.74329e-07	0.00604629
851	4.77989e-06	1.08435e-06	7.22901e-07	0.015933
852	1.8002e-06	4.08389e-07	2.72259e-07	0.00600068
853	1.74776e-05	3.96491e-06	2.64327e-06	0.0582586
854	1.24337e-05	2.82068e-06	1.88046e-06	0.0414458
855	1.33365e-06	3.02549e-07	2.01699e-07	0.00444551
856	1.12508e-05	2.55231e-06	1.70154e-06	0.0375025
857	8.28435e-06	1.87936e-06	1.25291e-06	0.0276145
858	1.56947e-05	3.56046e-06	2.37364e-06	0.0523157
859	8.95549e-06	2.03162e-06	1.35441e-06	0.0298516
860	8.09445e-06	1.83628e-06	1.22419e-06	0.0269815
861	1.38349e-05	3.13855e-06	2.09236e-06	0.0461163
862	1.28658e-05	2.91869e-06	1.9458e-06	0.0428859
863	9.41851e-06	2.13666e-06	1.42444e-06	0.031395
864	8.74646e-06	1.9842e-06	1.3228e-06	0.0291549
865	5.51398e-06	1.25089e-06	8.33923e-07	0.0183799
866	4.86077e-06	1.1027e-06	7.35134e-07	0.0162026
867	1.08937e-05	2.47131e-06	1.64754e-06	0.0363123
868	6.03721e-06	1.36958e-06	9.13056e-07	0.020124
869	5.13512e-06	1.16494e-06	7.76626e-07	0.0171171
870	2.0596e-05	4.67235e-06	3.1149e-06	0.0686534
871	1.18493e-05	2.6881e-06	1.79207e-06	0.0394977
872	1.11426e-05	2.52779e-06	1.68519e-06	0.0371421
873	2.25972e-05	5.12634e-06	3.41756e-06	0.075324
874	7.30485e-06	1.65716e-06	1.10477e-06	0.0243495
875	1.9434e-05	4.40874e-06	2.93916e-06	0.06478
876	4.15235e-06	9.41989e-07	6.27993e-07	0.0138412
877	6.72619e-06	1.52588e-06	1.01726e-06	0.0224206
878	8.13192e-06	1.84478e-06	1.22986e-06	0.0271064
879	6.71121e-06	1.52249e-06	1.01499e-06	0.0223707
880	7.92725e-06	1.79835e-06	1.1989e-06	0.0264242
881	1.35751e-05	3.07961e-06	2.05308e-06	0.0452504
882	4.83163e-06	1.09609e-06	7.30727e-07	0.0161054
883	7.67175e-06	1.74039e-06	1.16026e-06	0.0255725
884	2.59134e-06	5.87864e-07	3.91909e-07	0.00863779
885	6.00602e-06	1.36251e-06	9.0834e-07	0.0200201
886	9.28149e-06	2.10557e-06	1.40372e-06	0.0309383
887	3.60153e-06	8.17032e-07	5.44688e-07	0.0120051
888	5.91546e-06	1.34196e-06	8.94643e-07	0.0197182
889	9.21148e-06	2.08969e-06	1.39313e-06	0.0307049
890	8.75068e-06	1.98515e-06	1.32344e-06	0.0291689
891	8.66157e-06	1.96494e-06	1.30996e-06	0.0288719
892	4.36216e-06	9.89586e-07	6.59724e-07	0.0145405
893	6.70832e-06	1.52183e-06	1.01455e-06	0.0223611
894	1.30052e-06	2.95032e-07	1.96688e-07	0.00433507
895	4.73186e-06	1.07346e-06	7.15638e-07	0.0157729
896	7.09526e-06	1.60961e-06	1.07307e-06	0.0236509
897	2.89017e-06	6.55656e-07	4.37104e-07	0.00963391
898	3.02644e-06	6.8657e-07	4.57713e-07	0.0100881
899	2.79773e-06	6.34686e-07	4.23124e-07	0.00932577
900	5.72125e-06	1.29791e-06	8.65272e-07	0.0190708
901	6.83265e-06	1.55004e-06	1.03336e-06	0.0227755
902	4.64394e-06	1.05351e-06	7.0234e-07	0.0154798
903	9.34756e-06	2.12056e-06	1.41371e-06	0.0311585
904	1.63898e-05	3.71815e-06	2.47877e-06	0.0546328
905	2.65129e-06	6.01464e-07	4.00976e-07	0.00883763
906	1.31382e-05	2.9805e-06	1.987e-06	0.0437941
907	1.16624e-05	2.64571e-06	1.76381e-06	0.0388748
908	3.26206e-06	7.40021e-07	4.93347e-07	0.0108735
909	1.13057e-05	2.56478e-06	1.70985e-06	0.0376856
910	4.22124e-06	9.57619e-07	6.38413e-07	0.0140708
911	1.94081e-05	4.40286e-06	2.93524e-06	0.0646936
912	1.58787e-06	3.6022e-07	2.40147e-07	0.0052929
913	6.69605e-06	1.51905e-06	1.0127e-06	0.0223202
914	1.30853e-05	2.9685e-06	1.979e-06	0.0436178
915	1.19291e-05	2.70621e-06	1.80414e-06	0.0397638
916	2.10842e-06	4.7831e-07	3.18874e-07	0.00702807
917	8.62426e-06	1.95647e-06	1.30432e-06	0.0287475
918	1.28651e-05	2.91853e-06	1.94569e-06	0.0428836
919	5.57329e-06	1.26434e-06	8.42893e-07	0.0185776
920	8.31535e-06	1.8864e-06	1.2576e-06	0.0277178
921	1.18431e-05	2.6867e-06	1.79113e-06	0.0394772
922	1.01497e-05	2.30253e-06	1.53502e-06	0.0338324
923	3.56303e-06	8.08299e-07	5.38866e-07	0.0118768
924	6.03823e-06	1.36981e-06	9.1321e-07	0.0201274
925	9.31682e-06	2.11359e-06	1.40906e-06	0.0310561
926	1.82867e-05	4.14847e-06	2.76564e-06	0.0609556
927	3.22365e-06	7.31307e-07	4.87538e-07	0.0107455
928	1.20376e-05	2.73082e-06	1.82055e-06	0.0401254
929	6.77815e-06	1.53767e-06	1.02511e-06	0.0225938
930	3.7009e-06	8.39575e-07	5.59717e-07	0.0123363
931	6.18052e-06	1.4021e-06	9.3473e-07	0.0206017
932	3.21677e-06	7.29746e-07	4.86498e-07	0.0107226
933	8.75128e-06	1.98529e-06	1.32353e-06	0.0291709
934	1.00689e-05	2.2842e-06	1.5228e-06	0.033563
935	8.67355e-06	1.96766e-06	1.31177e-06	0.0289118
936	5.27052e-06	1.19566e-06	7.97104e-07	0.0175684
937	1.69475e-06	3.84467e-07	2.56311e-07	0.00564918
938	8.58356e-06	1.94724e-06	1.29816e-06	0.0286119
939	1.12435e-05	2.55067e-06	1.70045e-06	0.0374784
940	9.46134e-06	2.14637e-06	1.43092e-06	0.0315378
941	4.55912e-06	1.03427e-06	6.89513e-07	0.0151971
942	1.06347e-05	2.41256e-06	1.60837e-06	0.035449
943	1.0794e-05	2.4487e-06	1.63246e-06	0.03598
944	7.61538e-06	1.7276e-06	1.15174e-06	0.0253846
945	5.30267e-06	1.20295e-06	8.01966e-07	0.0176756
946	1.14968e-05	2.60814e-06	1.73876e-06	0.0383227
947	7.78219e-06	1.76545e-06	1.17696e-06	0.0259406
948	2.76152e-06	6.2647e-07	4.17647e-07	0.00920506
949	2.77859e-06	6.30344e-07	4.20229e-07	0.00926198
950	7.0258e-06	1.59385e-06	1.06257e-06	0.0234193
951	5.55441e-06	1.26006e-06	8.40038e-07	0.0185147
952	1.21287e-05	2.75149e-06	1.83432e-06	0.0404291
953	2.91704e-05	6.61752e-06	4.41168e-06	0.0972347
954	4.52378e-06	1.02625e-06	6.84167e-07	0.0150793
955	3.15722e-06	7.16238e-07	4.77492e-07	0.0105241
956	3.01905e-06	6.84892e-07	4.56595e-07	0.0100635
957	1.26541e-05	2.87068e-06	1.91379e-06	0.0421804
958	2.25071e-06	5.10589e-07	3.40392e-07	0.00750235
959	4.46458e-06	1.01282e-06	6.75215e-07	0.0148819
960	7.53106e-06	1.70847e-06	1.13898e-06	0.0251035
961	5.15146e-06	1.16865e-06	7.79097e-07	0.0171715
962	1.67399e-05	3.79755e-06	2.5317e-06	0.0557995
963	1.04627e-05	2.37355e-06	1.58236e-06	0.0348758
964	7.50889e-06	1.70344e-06	1.13563e-06	0.0250296
965	3.899e-06	8.84517e-07	5.89678e-07	0.0129967
966	4.46698e-06	1.01337e-06	6.75577e-07	0.0148899
967	6.14589e-06	1.39424e-06	9.29492e-07	0.0204863
968	1.3154e-05	2.98408e-06	1.98939e-06	0.0438467
969	5.69996e-06	1.29308e-06	8.62052e-07	0.0189999
970	6.13686e-06	1.39219e-06	9.28126e-07	0.0204562
971	1.4763e-05	3.34909e-06	2.23272e-06	0.0492099
972	3.56342e-06	8.08388e-07	5.38925e-07	0.0118781
973	5.73051e-06	1.30001e-06	8.66672e-07	0.0191017
974	2.0823e-06	4.72384e-07	3.14923e-07	0.00694099
975	1.39864e-05	3.17292e-06	2.11528e-06	0.0466214
976	5.41301e-06	1.22798e-06	8.18653e-07	0.0180434
977	1.84109e-05	4.17664e-06	2.78443e-06	0.0613696
978	1.96009e-06	4.44661e-07	2.96441e-07	0.00653364
979	1.55559e-05	3.52897e-06	2.35265e-06	0.0518531
980	1.6908e-05	3.83571e-06	2.55714e-06	0.0563601
981	1.19889e-05	2.71978e-06	1.81318e-06	0.0399631
982	5.97201e-06	1.35479e-06	9.03195e-07	0.0199067
983	1.26841e-05	2.87747e-06	1.91832e-06	0.0422803
984	3.24352e-06	7.35816e-07	4.90544e-07	0.0108117
985	1.08368e-05	2.4584e-06	1.63893e-06	0.0361226
986	3.63996e-06	8.2575e-07	5.505e-07	0.0121332
987	6.12423e-06	1.38932e-06	9.26216e-07	0.0204141
988	5.03919e-06	1.14318e-06	7.62118e-07	0.0167973
989	8.85122e-06	2.00796e-06	1.33864e-06	0.0295041
990	6.15459e-06	1.39621e-06	9.30808e-07	0.0205153
991	1.04974e-05	2.38141e-06	1.58761e-06	0.0349914
992	7.04247e-06	1.59764e-06	1.06509e-06	0.0234749
993	6.27967e-06	1.42459e-06	9.49725e-07	0.0209322
994	1.05516e-05	2.3937e-06	1.5958e-06	0.0351718
995	5.20821e-06	1.18152e-06	7.87679e-07	0.0173607
996	2.62046e-06	5.94471e-07	3.96314e-07	0.00873488
997	4.1657e-06	9.4502e-07	6.30013e-07	0.0138857
998	1.03128e-05	2.33954e-06	1.55969e-06	0.0343761
999	8.47865e-06	1.92344e-06	1.28229e-06	0.0282622
1000	9.19725e-06	2.08646e-06	1.39097e-06	0.0306575
1001	6.48504e-06	1.47118e-06	9.80785e-07	0.0216168
1002	2.74944e-06	6.2373e-07	4.1582e-07	0.00916479
1003	5.64501e-06	1.28061e-06	8.53741e-07	0.0188167
1004	4.0266e-06	9.13463e-07	6.08975e-07	0.013422
1005	7.28565e-06	1.6528e-06	1.10187e-06	0.0242855
1006	2.79257e-05	6.33514e-06	4.22342e-06	0.0930855
1007	1.26268e-05	2.86447e-06	1.90965e-06	0.0420893
1008	3.11177e-06	7.05927e-07	4.70618e-07	0.0103726
1009	1.34099e-06	3.04213e-07	2.02809e-07	0.00446996
1010	5.52445e-06	1.25326e-06	8.35508e-07	0.0184148
1011	1.25997e-05	2.85833e-06	1.90556e-06	0.041999
1012	6.85766e-06	1.55571e-06	1.03714e-06	0.0228589
1013	1.64843e-05	3.73958e-06	2.49305e-06	0.0549476
1014	8.5612e-06	1.94217e-06	1.29478e-06	0.0285373
1015	4.37725e-06	9.93011e-07	6.62007e-07	0.0145908
1016	4.92645e-06	1.1176e-06	7.45067e-07	0.0164215
1017	2.26736e-06	5.14366e-07	3.42911e-07	0.00755786
1018	8.47978e-06	1.9237e-06	1.28247e-06	0.0282659
1019	5.17102e-06	1.17308e-06	7.82055e-07	0.0172367
1020	7.5047e-06	1.70249e-06	1.135e-06	0.0250157
1021	1.91743e-05	4.34982e-06	2.89988e-06	0.0639142
1022	1.9418e-05	4.40512e-06	2.93675e-06	0.0647268
1023	1.1775e-05	2.67125e-06	1.78083e-06	0.0392501
1024	9.8588e-06	2.23654e-06	1.49103e-06	0.0328627
1025	1.27284e-05	2.88753e-06	1.92502e-06	0.0424281
1026	1.32813e-05	3.01296e-06	2.00864e-06	0.0442711
1027	1.24563e-05	2.82581e-06	1.88387e-06	0.0415211
1028	7.31025e-06	1.65838e-06	1.10559e-06	0.0243675
1029	1.0627e-05	2.41082e-06	1.60721e-06	0.0354235
1030	4.47758e-06	1.01577e-06	6.77181e-07	0.0149253
1031	5.1975e-06	1.17909e-06	7.8606e-07	0.017325
1032	7.93075e-06	1.79915e-06	1.19943e-06	0.0264358
1033	1.67135e-05	3.79158e-06	2.52772e-06	0.0557117
1034	1.67719e-05	3.80484e-06	2.53656e-06	0.0559065
1035	9.45018e-06	2.14384e-06	1.42923e-06	0.0315006
1036	8.02895e-06	1.82142e-06	1.21428e-06	0.0267632
1037	1.31184e-05	2.976e-06	1.984e-06	0.0437279
1038	1.88174e-06	4.26887e-07	2.84591e-07	0.00627248
1039	6.72876e-06	1.52647e-06	1.01765e-06	0.0224292
1040	6.07306e-06	1.37772e-06	9.18479e-07	0.0202435
1041	7.48173e-06	1.69728e-06	1.13152e-06	0.0249391
1042	7.3105e-06	1.65844e-06	1.10563e-06	0.0243683
1043	1.23448e-05	2.8005e-06	1.867e-06	0.0411493
1044	1.18447e-05	2.68707e-06	1.79138e-06	0.0394825
1045	2.69366e-06	6.11077e-07	4.07385e-07	0.00897888
1046	8.10664e-06	1.83905e-06	1.22603e-06	0.0270221
1047	4.21474e-06	9.56144e-07	6.37429e-07	0.0140491
1048	1.53684e-05	3.48643e-06	2.32428e-06	0.0512279
1049	4.33496e-06	9.83416e-07	6.55611e-07	0.0144499
1050	1.1798e-05	2.67646e-06	1.78431e-06	0.0393267
1051	9.81032e-06	2.22554e-06	1.48369e-06	0.0327011
1052	1.08278e-05	2.45635e-06	1.63757e-06	0.0360925
1053	4.53394e-06	1.02856e-06	6.85704e-07	0.0151131
1054	1.44338e-05	3.27441e-06	2.18294e-06	0.0481127
1055	6.61934e-06	1.50164e-06	1.0011e-06	0.0220645
1056	1.0527e-06	2.38812e-07	1.59208e-07	0.00350899
1057	2.67537e-06	6.06927e-07	4.04618e-07	0.0089179
1058	1.29798e-05	2.94456e-06	1.96304e-06	0.0432661
1059	1.1446e-05	2.5966e-06	1.73107e-06	0.0381532
1060	5.81904e-06	1.32009e-06	8.8006e-07	0.0193968
1061	1.56305e-05	3.54588e-06	2.36392e-06	0.0521016
1062	2.48108e-05	5.62851e-06	3.75234e-06	0.0827028
1063	4.86832e-06	1.10441e-06	7.36276e-07	0.0162277
1064	1.18551e-05	2.68942e-06	1.79294e-06	0.039517
1065	5.70339e-06	1.29385e-06	8.62569e-07	0.0190113
1066	6.25417e-06	1.4188e-06	9.45868e-07	0.0208472
1067	5.50891e-06	1.24974e-06	8.33158e-07	0.018363
1068	1.22763e-05	2.78496e-06	1.85664e-06	0.0409209
1069	1.37223e-05	3.113e-06	2.07533e-06	0.045741
1070	2.25306e-05	5.11122e-06	3.40748e-06	0.0751018
1071	3.08072e-06	6.98883e-07	4.65922e-07	0.0102691
1072	5.4326e-06	1.23242e-06	8.21616e-07	0.0181087
1073	1.19435e-05	2.70948e-06	1.80632e-06	0.0398118
1074	6.08309e-06	1.37999e-06	9.19994e-07	0.020277
1075	6.475e-06	1.4689e-06	9.79266e-07	0.0215833
1076	2.50525e-05	5.68335e-06	3.7889e-06	0.0835085
1077	5.00125e-06	1.13457e-06	7.56379e-07	0.0166708
1078	2.50298e-05	5.6782e-06	3.78546e-06	0.0834328
1079	6.75057e-06	1.53142e-06	1.02094e-06	0.0225019
1080	1.31384e-05	2.98053e-06	1.98702e-06	0.0437946
1081	9.19263e-06	2.08541e-06	1.39028e-06	0.0306421
1082	6.98495e-06	1.58459e-06	1.05639e-06	0.0232832
1083	5.82878e-06	1.3223e-06	8.81534e-07	0.0194293
1084	3.04034e-06	6.89722e-07	4.59815e-07	0.0101345
1085	1.15732e-05	2.62545e-06	1.7503e-06	0.0385772
1086	9.99519e-06	2.26748e-06	1.51165e-06	0.0333173
1087	1.18497e-05	2.68819e-06	1.79212e-06	0.039499
1088	1.07647e-05	2.44205e-06	1.62803e-06	0.0358824
1089	1.27781e-05	2.8988e-06	1.93253e-06	0.0425936
1090	1.08888e-05	2.4702e-06	1.6468e-06	0.036296
1091	1.06788e-05	2.42257e-06	1.61505e-06	0.0355961
1092	7.54392e-06	1.71139e-06	1.14093e-06	0.0251464
1093	7.99823e-06	1.81446e-06	1.20964e-06	0.0266608
1094	4.43119e-06	1.00525e-06	6.70165e-07	0.0147706
1095	1.58402e-05	3.59346e-06	2.39564e-06	0.0528007
1096	6.93736e-06	1.57379e-06	1.04919e-06	0.0231245
1097	7.05262e-06	1.59994e-06	1.06662e-06	0.0235087
1098	6.21682e-06	1.41033e-06	9.4022e-07	0.0207227
1099	9.27711e-06	2.10458e-06	1.40305e-06	0.0309237
1100	1.7615e-05	3.99609e-06	2.66406e-06	0.0587166
1101	9.20898e-06	2.08912e-06	1.39275e-06	0.0306966
1102	8.39695e-06	1.90491e-06	1.26994e-06	0.0279898
1103	2.80431e-06	6.36178e-07	4.24119e-07	0.00934771
1104	9.36202e-06	2.12384e-06	1.41589e-06	0.0312067
1105	1.66311e-05	3.77288e-06	2.51525e-06	0.0554369
1106	2.00298e-05	4.5439e-06	3.02927e-06	0.066766
1107	8.35066e-06	1.89441e-06	1.26294e-06	0.0278355
1108	2.7602e-06	6.26171e-07	4.17447e-07	0.00920066
1109	6.26329e-06	1.42087e-06	9.47248e-07	0.0208776
1110	6.29721e-06	1.42857e-06	9.52378e-07	0.0209907
1111	1.12844e-05	2.55996e-06	1.70664e-06	0.0376148
1112	6.78037e-06	1.53817e-06	1.02545e-06	0.0226012
1113	1.0597e-05	2.40401e-06	1.60268e-06	0.0353234
1114	6.94987e-06	1.57663e-06	1.05109e-06	0.0231662
1115	6.00501e-06	1.36228e-06	9.08187e-07	0.0200167
1116	1.06203e-05	2.40929e-06	1.6062e-06	0.035401
1117	4.11882e-06	9.34383e-07	6.22922e-07	0.0137294
1118	9.88373e-06	2.2422e-06	1.4948e-06	0.0329458
1119	3.00817e-06	6.82424e-07	4.5495e-07	0.0100272
1120	9.17653e-06	2.08176e-06	1.38784e-06	0.0305884
1121	1.16549e-05	2.644e-06	1.76267e-06	0.0388498
1122	6.8919e-06	1.56348e-06	1.04232e-06	0.022973
1123	1.75495e-05	3.98123e-06	2.65415e-06	0.0584983
1124	3.97582e-06	9.01943e-07	6.01295e-07	0.0132527
1125	4.79867e-06	1.08861e-06	7.25742e-07	0.0159956
1126	4.6792e-06	1.06151e-06	7.07674e-07	0.0155973
1127	9.63036e-06	2.18472e-06	1.45648e-06	0.0321012
1128	6.54353e-06	1.48445e-06	9.89631e-07	0.0218118
1129	1.16067e-05	2.63306e-06	1.75537e-06	0.038689
1130	9.18418e-06	2.0835e-06	1.389e-06	0.0306139
1131	4.22874e-06	9.5932e-07	6.39547e-07	0.0140958
1132	8.39628e-06	1.90476e-06	1.26984e-06	0.0279876
1133	6.95766e-06	1.5784e-06	1.05226e-06	0.0231922
1134	7.96683e-06	1.80733e-06	1.20489e-06	0.0265561
1135	2.73501e-06	6.20456e-07	4.13637e-07	0.00911669
1136	1.22583e-05	2.78087e-06	1.85391e-06	0.0408608
1137	8.64829e-06	1.96193e-06	1.30795e-06	0.0288276
1138	1.85393e-05	4.20577e-06	2.80385e-06	0.0617977
1139	1.51786e-05	3.44337e-06	2.29558e-06	0.0505952
1140	9.11131e-06	2.06697e-06	1.37798e-06	0.030371
1141	3.25755e-06	7.38999e-07	4.92666e-07	0.0108585
1142	1.05501e-05	2.39336e-06	1.59557e-06	0.0351669
1143	9.74328e-06	2.21033e-06	1.47356e-06	0.0324776
1144	2.67379e-06	6.06568e-07	4.04379e-07	0.00891263
1145	8.73568e-06	1.98175e-06	1.32117e-06	0.0291189
1146	7.48052e-06	1.69701e-06	1.13134e-06	0.0249351
1147	8.97985e-06	2.03714e-06	1.35809e-06	0.0299328
1148	2.67313e-06	6.06418e-07	4.04279e-07	0.00891043
1149	8.56673e-06	1.94342e-06	1.29562e-06	0.0285558
1150	7.53758e-06	1.70995e-06	1.13997e-06	0.0251253
1151	2.02476e-05	4.59332e-06	3.06221e-06	0.0674921
1152	1.28186e-05	2.908e-06	1.93867e-06	0.0427288
1153	9.64291e-06	2.18756e-06	1.45837e-06	0.032143
1154	3.06768e-06	6.95926e-07	4.6395e-07	0.0102256
1155	2.63479e-05	5.9772e-06	3.9848e-06	0.0878262
1156	9.39707e-06	2.13179e-06	1.4212e-06	0.0313236
1157	4.45503e-06	1.01065e-06	6.7377e-07	0.0148501
1158	8.35161e-06	1.89462e-06	1.26308e-06	0.0278387
1159	2.24533e-05	5.09369e-06	3.39579e-06	0.0748443
1160	9.44645e-06	2.143e-06	1.42866e-06	0.0314882
1161	1.59303e-06	3.61391e-07	2.40927e-07	0.00531011
1162	1.2337e-05	2.79873e-06	1.86582e-06	0.0411232
1163	2.09394e-05	4.75026e-06	3.16684e-06	0.0697981
1164	1.58939e-05	3.60564e-06	2.40376e-06	0.0529796
1165	4.45013e-06	1.00954e-06	6.7303e-07	0.0148338
1166	4.3207e-06	9.80182e-07	6.53455e-07	0.0144023
1167	1.58921e-05	3.60523e-06	2.40349e-06	0.0529736
1168	8.34098e-06	1.89221e-06	1.26147e-06	0.0278033
1169	2.10033e-06	4.76474e-07	3.17649e-07	0.00700109
1170	4.03948e-06	9.16385e-07	6.10923e-07	0.0134649
1171	6.02274e-06	1.3663e-06	9.10867e-07	0.0200758
1172	2.0462e-05	4.64195e-06	3.09463e-06	0.0682066
1173	3.9199e-06	8.89257e-07	5.92838e-07	0.0130663
1174	3.6561e-06	8.29412e-07	5.52941e-07	0.012187
1175	5.56567e-06	1.26261e-06	8.41742e-07	0.0185522
1176	7.96242e-06	1.80633e-06	1.20422e-06	0.0265414
1177	5.21381e-06	1.18279e-06	7.88526e-07	0.0173794
1178	5.77649e-06	1.31044e-06	8.73626e-07	0.019255
1179	1.18633e-05	2.69128e-06	1.79419e-06	0.0395445
1180	1.71819e-05	3.89783e-06	2.59855e-06	0.0572728
1181	9.78594e-06	2.22001e-06	1.48001e-06	0.0326198
1182	1.26496e-05	2.86966e-06	1.91311e-06	0.0421655
1183	8.31794e-06	1.88698e-06	1.25799e-06	0.0277265
1184	6.18023e-06	1.40203e-06	9.34687e-07	0.0206008
1185	3.12778e-05	7.0956e-06	4.7304e-06	0.104259
1186	8.06716e-06	1.83009e-06	1.22006e-06	0.0268905
1187	3.13487e-06	7.11167e-07	4.74111e-07	0.0104496
1188	8.10271e-06	1.83816e-06	1.22544e-06	0.027009
1189	6.53554e-06	1.48263e-06	9.88423e-07	0.0217851
1190	1.44578e-05	3.27986e-06	2.18658e-06	0.0481928
1191	7.00975e-06	1.59021e-06	1.06014e-06	0.0233658
1192	1.11958e-05	2.53984e-06	1.69323e-06	0.0373193
1193	1.90579e-05	4.32343e-06	2.88229e-06	0.0635265
1194	2.29192e-06	5.19938e-07	3.46625e-07	0.00763972
1195	1.26532e-05	2.87048e-06	1.91365e-06	0.0421775
1196	1.08168e-05	2.45386e-06	1.63591e-06	0.0360559
1197	9.56363e-07	2.16958e-07	1.44638e-07	0.00318788
1198	4.06542e-06	9.22269e-07	6.14846e-07	0.0135514
1199	8.84693e-06	2.00699e-06	1.33799e-06	0.0294898
1200	6.05889e-06	1.3745e-06	9.16336e-07	0.0201963
1201	1.16202e-06	2.63613e-07	1.75742e-07	0.00387341
1202	1.23836e-05	2.80931e-06	1.87287e-06	0.0412787
1203	6.22674e-06	1.41258e-06	9.4172e-07	0.0207558
1204	7.70893e-06	1.74882e-06	1.16588e-06	0.0256964
1205	8.17388e-06	1.8543e-06	1.2362e-06	0.0272463
1206	5.77334e-06	1.30972e-06	8.73149e-07	0.0192445
1207	9.03521e-06	2.0497e-06	1.36647e-06	0.0301174
1208	3.06776e-06	6.95943e-07	4.63962e-07	0.0102259
1209	3.4522e-06	7.83157e-07	5.22105e-07	0.0115073
1210	6.74477e-06	1.5301e-06	1.02007e-06	0.0224826
1211	3.96912e-06	9.00424e-07	6.00283e-07	0.0132304
1212	4.80279e-06	1.08955e-06	7.26365e-07	0.0160093
1213	3.02775e-06	6.86866e-07	4.57911e-07	0.0100925
1214	6.44182e-06	1.46137e-06	9.74249e-07	0.0214727
1215	7.10831e-06	1.61257e-06	1.07505e-06	0.0236944
1216	1.18974e-05	2.69902e-06	1.79935e-06	0.0396582
1217	2.19909e-06	4.98879e-07	3.32586e-07	0.00733029
1218	9.4496e-06	2.14371e-06	1.42914e-06	0.0314987
1219	6.97545e-06	1.58243e-06	1.05495e-06	0.0232515
1220	1.00981e-05	2.29083e-06	1.52722e-06	0.0336604
1221	1.11369e-05	2.52649e-06	1.68432e-06	0.037123
1222	2.72007e-06	6.17068e-07	4.11379e-07	0.00906691
1223	4.38663e-06	9.95138e-07	6.63426e-07	0.0146221
1224	4.51927e-06	1.02523e-06	6.83486e-07	0.0150642
1225	8.23144e-06	1.86736e-06	1.24491e-06	0.0274381
1226	4.0761e-06	9.24691e-07	6.16461e-07	0.013587
1227	5.53541e-06	1.25575e-06	8.37165e-07	0.0184514
1228	8.61147e-06	1.95357e-06	1.30238e-06	0.0287049
1229	3.35877e-06	7.61962e-07	5.07974e-07	0.0111959
1230	1.52527e-05	3.46019e-06	2.3068e-06	0.0508425
1231	6.23694e-06	1.41489e-06	9.43263e-07	0.0207898
1232	7.33288e-06	1.66352e-06	1.10901e-06	0.0244429
1233	5.44846e-06	1.23602e-06	8.24014e-07	0.0181615
1234	9.76883e-06	2.21613e-06	1.47742e-06	0.0325628
1235	3.55602e-06	8.06709e-07	5.37806e-07	0.0118534
1236	5.51177e-06	1.25039e-06	8.3359e-07	0.0183726
1237	1.28295e-05	2.91046e-06	1.9403e-06	0.0427649
1238	9.4724e-06	2.14888e-06	1.43259e-06	0.0315747
1239	5.26598e-06	1.19462e-06	7.96416e-07	0.0175533
1240	1.15091e-05	2.61093e-06	1.74062e-06	0.0383638
1241	1.90967e-06	4.33222e-07	2.88815e-07	0.00636557
1242	7.71274e-06	1.74969e-06	1.16646e-06	0.0257091
1243	5.197e-06	1.17898e-06	7.85984e-07	0.0173233
1244	7.07429e-06	1.60485e-06	1.0699e-06	0.023581
1245	1.20276e-05	2.72854e-06	1.81903e-06	0.0400919
1246	8.90443e-06	2.02003e-06	1.34669e-06	0.0296814
1247	3.9565e-06	8.97561e-07	5.98374e-07	0.0131883
1248	3.52964e-06	8.00723e-07	5.33815e-07	0.0117655
1249	7.45008e-06	1.6901e-06	1.12674e-06	0.0248336
1250	1.24801e-05	2.8312e-06	1.88746e-06	0.0416003
1251	1.65015e-05	3.74347e-06	2.49565e-06	0.0550048
1252	1.50979e-05	3.42506e-06	2.28337e-06	0.0503262
1253	6.90323e-06	1.56605e-06	1.04403e-06	0.0230108
1254	9.87895e-07	2.24111e-07	1.49407e-07	0.00329298
1255	7.06304e-06	1.6023e-06	1.0682e-06	0.0235435
1256	6.72597e-06	1.52583e-06	1.01722e-06	0.0224199
1257	6.20198e-06	1.40696e-06	9.37976e-07	0.0206733
1258	2.88859e-05	6.55297e-06	4.36865e-06	0.0962863
1259	8.88004e-06	2.0145e-06	1.343e-06	0.0296001
1260	1.70831e-05	3.87541e-06	2.58361e-06	0.0569435
1261	9.85333e-06	2.2353e-06	1.4902e-06	0.0328444
1262	1.76809e-06	4.01104e-07	2.67403e-07	0.00589363
1263	1.60532e-05	3.64179e-06	2.42786e-06	0.0535108
1264	4.38002e-06	9.9364e-07	6.62426e-07	0.0146001
1265	4.76614e-06	1.08123e-06	7.20822e-07	0.0158871
1266	4.6138e-06	1.04667e-06	6.97783e-07	0.0153793
1267	8.25165e-06	1.87194e-06	1.24796e-06	0.0275055
1268	1.47152e-05	3.33825e-06	2.2255e-06	0.0490507
1269	1.26874e-05	2.87822e-06	1.91882e-06	0.0422913
1270	5.23053e-06	1.18658e-06	7.91055e-07	0.0174351
1271	7.08381e-06	1.60701e-06	1.07134e-06	0.0236127
1272	2.06718e-06	4.68954e-07	3.12636e-07	0.00689059
1273	3.09895e-06	7.03019e-07	4.68679e-07	0.0103298
1274	5.46021e-06	1.23869e-06	8.25792e-07	0.0182007
1275	1.11423e-05	2.52771e-06	1.68514e-06	0.0371411
1276	3.33768e-06	7.57176e-07	5.04784e-07	0.0111256
1277	2.67082e-06	6.05896e-07	4.0393e-07	0.00890275
1278	1.97661e-05	4.48407e-06	2.98938e-06	0.0658869
1279	4.84846e-06	1.09991e-06	7.33272e-07	0.0161615
1280	9.30102e-06	2.11e-06	1.40667e-06	0.0310034
1281	5.32094e-06	1.20709e-06	8.04728e-07	0.0177365
1282	5.76193e-06	1.30714e-06	8.71424e-07	0.0192064
1283	4.40154e-06	9.9852e-07	6.6568e-07	0.0146718
1284	4.71931e-06	1.07061e-06	7.1374e-07	0.015731
1285	1.20348e-06	2.73018e-07	1.82012e-07	0.0040116
1286	1.21649e-05	2.7597e-06	1.8398e-06	0.0405497
1287	1.17383e-05	2.66292e-06	1.77528e-06	0.0391277
1288	6.19085e-06	1.40444e-06	9.36293e-07	0.0206362
1289	6.66647e-06	1.51234e-06	1.00822e-06	0.0222216
1290	1.10908e-05	2.51603e-06	1.67735e-06	0.0369694
1291	8.43495e-06	1.91353e-06	1.27569e-06	0.0281165
1292	5.62413e-06	1.27587e-06	8.50582e-07	0.0187471
1293	8.27709e-06	1.87772e-06	1.25181e-06	0.0275903
1294	1.29659e-05	2.94141e-06	1.96094e-06	0.0432196
1295	1.54213e-05	3.49843e-06	2.33229e-06	0.0514043
1296	7.17379e-06	1.62743e-06	1.08495e-06	0.0239126
1297	3.43821e-06	7.79984e-07	5.19989e-07	0.0114607
1298	8.12607e-06	1.84346e-06	1.22897e-06	0.0270869
1299	1.11621e-05	2.5322e-06	1.68813e-06	0.0372069
1300	1.05987e-05	2.40439e-06	1.60293e-06	0.035329
1301	7.58812e-06	1.72142e-06	1.14761e-06	0.0252937
1302	6.44793e-06	1.46276e-06	9.75172e-07	0.0214931
1303	6.01445e-06	1.36442e-06	9.09614e-07	0.0200482
1304	1.57503e-05	3.57307e-06	2.38204e-06	0.052501
1305	2.46555e-05	5.59327e-06	3.72884e-06	0.0821848
1306	9.23524e-06	2.09508e-06	1.39672e-06	0.0307841
1307	1.22436e-05	2.77756e-06	1.85171e-06	0.0408121
1308	5.92668e-06	1.34451e-06	8.9634e-07	0.0197556
1309	5.1652e-06	1.17176e-06	7.81175e-07	0.0172173
1310	1.13037e-05	2.56433e-06	1.70956e-06	0.0376791
1311	8.45042e-06	1.91704e-06	1.27803e-06	0.0281681
1312	5.28761e-06	1.19953e-06	7.99688e-07	0.0176254
1313	4.58795e-06	1.04081e-06	6.93872e-07	0.0152932
1314	7.40461e-06	1.67979e-06	1.11986e-06	0.024682
1315	2.59439e-05	5.88556e-06	3.92371e-06	0.0864797
1316	1.17654e-05	2.66907e-06	1.77938e-06	0.039218
1317	3.72492e-06	8.45025e-07	5.6335e-07	0.0124164
1318	5.88677e-06	1.33545e-06	8.90303e-07	0.0196226
1319	6.2756e-06	1.42367e-06	9.4911e-07	0.0209187
1320	1.40992e-05	3.19849e-06	2.13233e-06	0.0469972
1321	9.7664e-06	2.21558e-06	1.47705e-06	0.0325547
1322	7.43916e-06	1.68763e-06	1.12508e-06	0.0247972
1323	1.09867e-05	2.49242e-06	1.66161e-06	0.0366224
1324	1.80017e-05	4.08381e-06	2.72254e-06	0.0600056
1325	5.30265e-06	1.20294e-06	8.01963e-07	0.0176755
1326	2.03797e-06	4.62329e-07	3.08219e-07	0.00679324
1327	1.05506e-05	2.39347e-06	1.59565e-06	0.0351685
1328	4.66858e-06	1.0591e-06	7.06067e-07	0.0155619
1329	7.06314e-06	1.60232e-06	1.06822e-06	0.0235438
1330	8.70345e-06	1.97444e-06	1.31629e-06	0.0290115
1331	2.07747e-06	4.7129e-07	3.14193e-07	0.00692491
1332	1.10435e-05	2.5053e-06	1.6702e-06	0.0368117
1333	6.71677e-06	1.52375e-06	1.01583e-06	0.0223892
1334	8.27032e-06	1.87618e-06	1.25079e-06	0.0275677
1335	5.86604e-06	1.33075e-06	8.87169e-07	0.0195535
1336	7.76355e-06	1.76122e-06	1.17414e-06	0.0258785
1337	8.05345e-06	1.82698e-06	1.21799e-06	0.0268448
1338	7.3581e-06	1.66924e-06	1.11283e-06	0.024527
1339	1.15804e-05	2.6271e-06	1.7514e-06	0.0386014
1340	5.74115e-06	1.30242e-06	8.68281e-07	0.0191372
1341	1.36745e-05	3.10216e-06	2.0681e-06	0.0455816
1342	1.2616e-05	2.86203e-06	1.90802e-06	0.0420533
1343	3.7092e-06	8.41459e-07	5.60973e-07	0.012364
1344	2.96479e-06	6.72583e-07	4.48389e-07	0.00988263
1345	2.74131e-06	6.21886e-07	4.14591e-07	0.00913771
1346	3.10984e-06	7.05489e-07	4.70326e-07	0.0103661
1347	1.16951e-05	2.65312e-06	1.76875e-06	0.0389837
1348	4.19795e-06	9.52335e-07	6.3489e-07	0.0139932
1349	1.00195e-05	2.273e-06	1.51533e-06	0.0333984
1350	5.48592e-06	1.24452e-06	8.29679e-07	0.0182864
1351	1.4567e-05	3.30464e-06	2.20309e-06	0.0485568
1352	8.43401e-06	1.91332e-06	1.27554e-06	0.0281134
1353	1.5058e-06	3.41602e-07	2.27734e-07	0.00501934
1354	8.47721e-06	1.92312e-06	1.28208e-06	0.0282574
1355	5.37408e-06	1.21915e-06	8.12765e-07	0.0179136
1356	6.06162e-06	1.37512e-06	9.16748e-07	0.0202054
1357	1.15087e-05	2.61082e-06	1.74055e-06	0.0383622
1358	1.84252e-05	4.17988e-06	2.78658e-06	0.0614172
1359	1.1612e-06	2.63426e-07	1.75617e-07	0.00387066
1360	9.87701e-06	2.24067e-06	1.49378e-06	0.0329234
1361	1.22027e-05	2.76828e-06	1.84552e-06	0.0406758
1362	3.11829e-06	7.07407e-07	4.71605e-07	0.0103943
1363	2.7076e-06	6.14239e-07	4.09493e-07	0.00902535
1364	3.43074e-05	7.78287e-06	5.18858e-06	0.114358
1365	6.21721e-06	1.41042e-06	9.40279e-07	0.020724
1366	3.67309e-06	8.33266e-07	5.5551e-07	0.0122436
1367	6.58296e-06	1.49339e-06	9.95595e-07	0.0219432
1368	1.30228e-05	2.95431e-06	1.96954e-06	0.0434093
1369	9.16061e-06	2.07815e-06	1.38543e-06	0.0305354
1370	4.65689e-06	1.05645e-06	7.04299e-07	0.015523
1371	7.63159e-06	1.73128e-06	1.15419e-06	0.0254386
1372	7.42152e-06	1.68363e-06	1.12242e-06	0.0247384
1373	2.20674e-05	5.00615e-06	3.33743e-06	0.073558
1374	7.11583e-06	1.61428e-06	1.07618e-06	0.0237194
1375	6.71054e-06	1.52233e-06	1.01489e-06	0.0223685
1376	2.25401e-05	5.11339e-06	3.40893e-06	0.0751338
1377	7.41092e-06	1.68122e-06	1.12081e-06	0.0247031
1378	4.36012e-06	9.89124e-07	6.59416e-07	0.0145337
1379	5.6188e-06	1.27467e-06	8.49777e-07	0.0187293
1380	5.90162e-06	1.33882e-06	8.92549e-07	0.0196721
1381	1.32324e-05	3.00186e-06	2.00124e-06	0.0441079
1382	4.31726e-06	9.79401e-07	6.52934e-07	0.0143909
1383	1.39051e-05	3.15447e-06	2.10298e-06	0.0463503
1384	9.55414e-06	2.16743e-06	1.44495e-06	0.0318471
1385	1.0585e-05	2.40129e-06	1.60086e-06	0.0352834
1386	2.7294e-06	6.19185e-07	4.1279e-07	0.00909801
1387	1.03692e-05	2.35234e-06	1.56822e-06	0.0345641
1388	1.72601e-05	3.91558e-06	2.61038e-06	0.0575336
1389	1.1022e-05	2.50043e-06	1.66695e-06	0.0367401
1390	3.80012e-06	8.62085e-07	5.74723e-07	0.0126671
1391	9.19421e-06	2.08577e-06	1.39051e-06	0.0306474
1392	1.30844e-05	2.96829e-06	1.97886e-06	0.0436147
1393	7.98273e-06	1.81094e-06	1.20729e-06	0.0266091
1394	1.03771e-05	2.35411e-06	1.56941e-06	0.0345902
1395	5.06055e-06	1.14802e-06	7.65348e-07	0.0168685
1396	8.5828e-06	1.94707e-06	1.29805e-06	0.0286093
1397	3.72747e-06	8.45602e-07	5.63735e-07	0.0124249
1398	7.17218e-06	1.62706e-06	1.08471e-06	0.0239073
1399	5.62401e-06	1.27585e-06	8.50564e-07	0.0187467
1400	3.05827e-06	6.93791e-07	4.62527e-07	0.0101942
1401	8.88783e-06	2.01627e-06	1.34418e-06	0.0296261
1402	6.3504e-06	1.44063e-06	9.60423e-07	0.021168
1403	5.62409e-06	1.27586e-06	8.50576e-07	0.018747
1404	2.80585e-05	6.36528e-06	4.24352e-06	0.0935285
1405	3.98934e-06	9.0501e-07	6.0334e-07	0.0132978
1406	5.3607e-06	1.21611e-06	8.10742e-07	0.017869
1407	3.3519e-06	7.60403e-07	5.06935e-07	0.011173
1408	3.0532e-06	6.92639e-07	4.6176e-07	0.0101773
1409	1.42913e-05	3.24207e-06	2.16138e-06	0.0476375
1410	5.01903e-06	1.1386e-06	7.59068e-07	0.0167301
1411	8.55776e-06	1.94139e-06	1.29426e-06	0.0285259
1412	8.72418e-06	1.97914e-06	1.31943e-06	0.0290806
1413	1.31779e-05	2.98949e-06	1.993e-06	0.0439262
1414	3.51989e-06	7.98511e-07	5.32341e-07	0.011733
1415	1.83182e-05	4.15561e-06	2.77041e-06	0.0610606
1416	1.55942e-05	3.53765e-06	2.35843e-06	0.0519806
1417	4.67352e-06	1.06022e-06	7.06814e-07	0.0155784
1418	7.59484e-06	1.72294e-06	1.14863e-06	0.0253161
1419	1.25961e-05	2.85752e-06	1.90502e-06	0.0419871
1420	9.19355e-07	2.08562e-07	1.39041e-07	0.00306452
1421	1.39218e-05	3.15827e-06	2.10551e-06	0.0464062
1422	8.81602e-06	1.99998e-06	1.33332e-06	0.0293867
1423	1.11352e-05	2.52609e-06	1.68406e-06	0.0371172
1424	5.71241e-06	1.2959e-06	8.63934e-07	0.0190414
1425	6.68839e-06	1.51731e-06	1.01154e-06	0.0222946
1426	1.38908e-05	3.15123e-06	2.10082e-06	0.0463028
1427	2.2201e-06	5.03645e-07	3.35763e-07	0.00740032
1428	6.96286e-06	1.57957e-06	1.05305e-06	0.0232095
1429	7.57919e-06	1.71939e-06	1.14626e-06	0.025264
1430	2.08747e-06	4.73557e-07	3.15705e-07	0.00695823
1431	6.23766e-06	1.41506e-06	9.43371e-07	0.0207922
1432	3.59288e-06	8.15069e-07	5.4338e-07	0.0119763
1433	6.6878e-06	1.51717e-06	1.01145e-06	0.0222927
1434	2.61742e-06	5.93779e-07	3.95853e-07	0.00872472
1435	1.37125e-05	3.11078e-06	2.07386e-06	0.0457084
1436	2.20756e-05	5.008e-06	3.33867e-06	0.0735852
1437	8.41278e-06	1.9085e-06	1.27233e-06	0.0280426
1438	1.1964e-05	2.71413e-06	1.80942e-06	0.0398801
1439	1.38813e-05	3.14906e-06	2.09937e-06	0.0462709
1440	3.35145e-06	7.603e-07	5.06866e-07	0.0111715
1441	4.88193e-06	1.1075e-06	7.38334e-07	0.0162731
1442	1.19533e-05	2.71168e-06	1.80779e-06	0.0398442
1443	3.23939e-06	7.34879e-07	4.89919e-07	0.010798
1444	4.42291e-06	1.00337e-06	6.68912e-07	0.014743
1445	3.6186e-06	8.20906e-07	5.47271e-07	0.012062
1446	6.41179e-06	1.45456e-06	9.69707e-07	0.0213726
1447	3.95081e-06	8.96269e-07	5.97513e-07	0.0131694
1448	8.22478e-06	1.86585e-06	1.2439e-06	0.0274159
1449	5.29282e-06	1.20071e-06	8.00476e-07	0.0176427
1450	7.77963e-06	1.76486e-06	1.17658e-06	0.0259321
1451	1.04277e-05	2.36559e-06	1.57706e-06	0.0347589
1452	6.89596e-06	1.5644e-06	1.04293e-06	0.0229865
1453	8.70009e-06	1.97368e-06	1.31579e-06	0.0290003
1454	1.75391e-05	3.97887e-06	2.65258e-06	0.0584636
1455	7.10815e-06	1.61253e-06	1.07502e-06	0.0236938
1456	2.22744e-06	5.0531e-07	3.36873e-07	0.00742479
1457	5.75837e-06	1.30633e-06	8.70886e-07	0.0191946
1458	9.021e-06	2.04648e-06	1.36432e-06	0.03007
1459	8.47991e-06	1.92373e-06	1.28249e-06	0.0282664
1460	1.18881e-05	2.6969e-06	1.79793e-06	0.039627
1461	4.44704e-06	1.00884e-06	6.72562e-07	0.0148235
1462	4.22442e-06	9.58341e-07	6.38894e-07	0.0140814
1463	8.7984e-06	1.99598e-06	1.33065e-06	0.029328
1464	1.29668e-05	2.94162e-06	1.96108e-06	0.0432228
1465	1.56747e-05	3.55592e-06	2.37061e-06	0.052249
1466	4.11632e-06	9.33816e-07	6.22544e-07	0.0137211
1467	8.79618e-06	1.99548e-06	1.33032e-06	0.0293206
1468	9.1002e-06	2.06445e-06	1.3763e-06	0.030334
1469	4.52934e-06	1.02751e-06	6.85008e-07	0.0150978
1470	1.09496e-05	2.484e-06	1.656e-06	0.0364987
1471	2.44884e-05	5.55537e-06	3.70358e-06	0.081628
1472	8.25501e-06	1.87271e-06	1.24847e-06	0.0275167
1473	2.65795e-05	6.02975e-06	4.01983e-06	0.0885984
1474	4.83937e-06	1.09785e-06	7.31897e-07	0.0161312
1475	2.47254e-05	5.60913e-06	3.73942e-06	0.082418
1476	9.96197e-06	2.25995e-06	1.50663e-06	0.0332066
1477	7.45714e-06	1.69171e-06	1.1278e-06	0.0248571
1478	6.18225e-06	1.40249e-06	9.34992e-07	0.0206075
1479	9.33374e-06	2.11743e-06	1.41162e-06	0.0311125
1480	1.59795e-05	3.62506e-06	2.41671e-06	0.053265
1481	1.71283e-06	3.88568e-07	2.59045e-07	0.00570944
1482	8.70138e-06	1.97397e-06	1.31598e-06	0.0290046
1483	1.28647e-05	2.91846e-06	1.94564e-06	0.0428825
1484	6.49656e-06	1.47379e-06	9.82528e-07	0.0216552
1485	9.49598e-06	2.15423e-06	1.43615e-06	0.0316533
1486	8.8067e-06	1.99786e-06	1.33191e-06	0.0293557
1487	4.14276e-06	9.39814e-07	6.26542e-07	0.0138092
1488	8.11123e-06	1.84009e-06	1.22673e-06	0.0270374
1489	2.26792e-05	5.14494e-06	3.42996e-06	0.0755974
1490	1.47781e-05	3.35251e-06	2.23501e-06	0.0492603
1491	7.79097e-06	1.76744e-06	1.17829e-06	0.0259699
1492	7.64398e-06	1.73409e-06	1.15606e-06	0.0254799
1493	6.00143e-06	1.36147e-06	9.07644e-07	0.0200048
1494	8.79105e-06	1.99431e-06	1.32954e-06	0.0293035
1495	1.25907e-05	2.85628e-06	1.90419e-06	0.0419689
1496	5.02338e-06	1.13959e-06	7.59726e-07	0.0167446
1497	1.32614e-05	3.00844e-06	2.00563e-06	0.0442046
1498	5.06601e-06	1.14926e-06	7.66174e-07	0.0168867
1499	3.8209e-06	8.66799e-07	5.77866e-07	0.0127363
1500	7.73349e-06	1.7544e-06	1.1696e-06	0.0257783
1501	8.39993e-06	1.90558e-06	1.27039e-06	0.0279998
1502	7.09751e-06	1.61012e-06	1.07341e-06	0.0236584
1503	4.32534e-06	9.81234e-07	6.54156e-07	0.0144178
1504	7.55949e-06	1.71492e-06	1.14328e-06	0.0251983
1505	1.09683e-05	2.48824e-06	1.65883e-06	0.0365611
1506	5.45531e-06	1.23758e-06	8.25051e-07	0.0181844
1507	6.71464e-06	1.52326e-06	1.01551e-06	0.0223821
1508	4.09508e-06	9.28998e-07	6.19332e-07	0.0136503
1509	1.14242e-05	2.59166e-06	1.72777e-06	0.0380807
1510	2.85578e-06	6.47853e-07	4.31902e-07	0.00951925
1511	1.41199e-05	3.2032e-06	2.13547e-06	0.0470663
1512	8.76078e-06	1.98744e-06	1.32496e-06	0.0292026
1513	1.62473e-05	3.68582e-06	2.45721e-06	0.0541577
1514	3.6858e-06	8.3615e-07	5.57433e-07	0.012286
1515	6.56187e-06	1.48861e-06	9.92405e-07	0.0218729
1516	3.7981e-06	8.61626e-07	5.74418e-07	0.0126603
1517	1.59216e-05	3.61193e-06	2.40795e-06	0.053072
1518	6.12396e-06	1.38926e-06	9.26177e-07	0.0204132
1519	1.29093e-05	2.92856e-06	1.95238e-06	0.043031
1520	2.30235e-05	5.22304e-06	3.48203e-06	0.076745
1521	2.23387e-05	5.06768e-06	3.37846e-06	0.0744622
1522	9.74131e-06	2.20989e-06	1.47326e-06	0.032471
1523	3.09087e-06	7.01186e-07	4.67457e-07	0.0103029
1524	1.00536e-05	2.28074e-06	1.52049e-06	0.0335121
1525	5.70817e-06	1.29494e-06	8.63292e-07	0.0190272
1526	2.9418e-06	6.67368e-07	4.44912e-07	0.00980599
1527	2.88195e-06	6.53791e-07	4.35861e-07	0.0096065
1528	8.06069e-06	1.82862e-06	1.21908e-06	0.026869
1529	7.75553e-06	1.7594e-06	1.17293e-06	0.0258518
1530	6.58184e-06	1.49314e-06	9.95425e-07	0.0219395
1531	6.3843e-06	1.44832e-06	9.65549e-07	0.021281
1532	6.79062e-06	1.5405e-06	1.027e-06	0.0226354
1533	9.35855e-06	2.12305e-06	1.41537e-06	0.0311952
1534	5.26148e-06	1.1936e-06	7.95736e-07	0.0175383
1535	6.37102e-06	1.44531e-06	9.63541e-07	0.0212367
1536	3.02546e-06	6.86348e-07	4.57566e-07	0.0100849
1537	7.46418e-06	1.6933e-06	1.12887e-06	0.0248806
1538	1.59544e-05	3.61936e-06	2.41291e-06	0.0531812
1539	6.3958e-06	1.45093e-06	9.67288e-07	0.0213193
1540	1.87647e-05	4.25691e-06	2.83794e-06	0.062549
1541	6.04615e-06	1.37161e-06	9.14407e-07	0.0201538
1542	9.55014e-06	2.16652e-06	1.44434e-06	0.0318338
1543	6.92723e-06	1.57149e-06	1.04766e-06	0.0230908
1544	1.34533e-05	3.05199e-06	2.03466e-06	0.0448445
1545	7.94463e-06	1.8023e-06	1.20153e-06	0.0264821
1546	6.81978e-06	1.54712e-06	1.03141e-06	0.0227326
1547	8.77508e-06	1.99069e-06	1.32713e-06	0.0292503
1548	9.09013e-06	2.06216e-06	1.37477e-06	0.0303004
1549	1.91002e-05	4.33302e-06	2.88868e-06	0.0636673
1550	7.47382e-06	1.69549e-06	1.13033e-06	0.0249127
1551	4.14122e-06	9.39465e-07	6.2631e-07	0.0138041
1552	4.55965e-06	1.03439e-06	6.89593e-07	0.0151988
1553	4.86062e-06	1.10267e-06	7.35111e-07	0.0162021
1554	1.36885e-05	3.10533e-06	2.07022e-06	0.0456283
1555	2.98325e-06	6.7677e-07	4.5118e-07	0.00994415
1556	8.25165e-06	1.87195e-06	1.24796e-06	0.0275055
1557	4.54556e-06	1.03119e-06	6.87462e-07	0.0151519
1558	1.21101e-05	2.74727e-06	1.83151e-06	0.040367
1559	1.43775e-05	3.26164e-06	2.17443e-06	0.0479251
1560	9.31392e-06	2.11293e-06	1.40862e-06	0.0310464
1561	4.85805e-06	1.10208e-06	7.34722e-07	0.0161935
1562	8.13426e-06	1.84531e-06	1.23021e-06	0.0271142
1563	5.35953e-06	1.21585e-06	8.10565e-07	0.0178651
1564	9.9971e-06	2.26791e-06	1.51194e-06	0.0333237
1565	7.26375e-06	1.64783e-06	1.09856e-06	0.0242125
1566	4.56863e-06	1.03643e-06	6.9095e-07	0.0152288
1567	2.348e-06	5.32661e-07	3.55107e-07	0.00782667
1568	7.19394e-06	1.632e-06	1.088e-06	0.0239798
1569	1.05878e-05	2.40193e-06	1.60128e-06	0.0352928
1570	1.55034e-05	3.51707e-06	2.34471e-06	0.0516782
1571	8.50797e-06	1.93009e-06	1.28673e-06	0.0283599
1572	8.60905e-06	1.95302e-06	1.30202e-06	0.0286968
1573	3.31386e-06	7.51773e-07	5.01182e-07	0.0110462
1574	2.15243e-05	4.88295e-06	3.2553e-06	0.0717478
1575	1.43554e-05	3.25662e-06	2.17108e-06	0.0478512
1576	7.94665e-06	1.80276e-06	1.20184e-06	0.0264888
1577	2.00486e-06	4.54817e-07	3.03211e-07	0.00668286
1578	7.92371e-06	1.79755e-06	1.19837e-06	0.0264124
1579	3.67359e-06	8.33379e-07	5.55586e-07	0.0122453
1580	6.61099e-06	1.49975e-06	9.99833e-07	0.0220366
1581	6.70073e-06	1.52011e-06	1.01341e-06	0.0223358
1582	1.09728e-05	2.48926e-06	1.6595e-06	0.036576
1583	1.07289e-05	2.43393e-06	1.62262e-06	0.0357631
1584	2.44929e-06	5.55639e-07	3.70426e-07	0.00816431
1585	1.30115e-05	2.95174e-06	1.96783e-06	0.0433715
1586	4.97159e-06	1.12784e-06	7.51894e-07	0.016572
1587	1.18551e-06	2.68942e-07	1.79295e-07	0.00395171
1588	3.93006e-06	8.91563e-07	5.94375e-07	0.0131002
1589	6.49605e-06	1.47368e-06	9.8245e-07	0.0216535
1590	4.75866e-06	1.07954e-06	7.1969e-07	0.0158622
1591	6.83271e-06	1.55005e-06	1.03337e-06	0.0227757
1592	3.56117e-06	8.07877e-07	5.38585e-07	0.0118706
1593	8.92935e-06	2.02569e-06	1.35046e-06	0.0297645
1594	2.75178e-06	6.24261e-07	4.16174e-07	0.00917261
1595	1.00893e-05	2.28882e-06	1.52588e-06	0.0336309
1596	6.42638e-06	1.45787e-06	9.71914e-07	0.0214213
1597	4.14912e-06	9.41257e-07	6.27505e-07	0.0138304
1598	9.42096e-06	2.13721e-06	1.42481e-06	0.0314032
1599	4.8574e-06	1.10194e-06	7.34624e-07	0.0161913
1600	9.27357e-06	2.10378e-06	1.40252e-06	0.0309119
1601	5.81076e-06	1.31821e-06	8.78808e-07	0.0193692
1602	4.85502e-06	1.1014e-06	7.34264e-07	0.0161834
1603	1.5498e-05	3.51584e-06	2.34389e-06	0.0516601
1604	7.33972e-06	1.66507e-06	1.11005e-06	0.0244657
1605	6.90995e-06	1.56757e-06	1.04505e-06	0.0230332
1606	1.16015e-05	2.63188e-06	1.75459e-06	0.0386716
1607	4.71365e-06	1.06933e-06	7.12884e-07	0.0157122
1608	1.06082e-05	2.40655e-06	1.60436e-06	0.0353607
1609	8.65257e-06	1.9629e-06	1.3086e-06	0.0288419
1610	1.17007e-05	2.65438e-06	1.76959e-06	0.0390022
1611	9.65144e-06	2.1895e-06	1.45967e-06	0.0321715
1612	4.78795e-06	1.08618e-06	7.2412e-07	0.0159598
1613	6.15527e-06	1.39637e-06	9.30911e-07	0.0205176
1614	2.45456e-06	5.56834e-07	3.71223e-07	0.00818186
1615	1.23853e-05	2.8097e-06	1.87314e-06	0.0412845
1616	5.8724e-06	1.3322e-06	8.88131e-07	0.0195747
1617	1.05455e-05	2.39233e-06	1.59489e-06	0.0351518
1618	1.83041e-05	4.15243e-06	2.76828e-06	0.0610138
1619	4.56185e-06	1.03489e-06	6.89926e-07	0.0152062
1620	7.92174e-06	1.7971e-06	1.19807e-06	0.0264058
1621	4.26842e-06	9.68321e-07	6.45547e-07	0.0142281
1622	1.36928e-06	3.10631e-07	2.07087e-07	0.00456426
1623	5.71403e-06	1.29627e-06	8.64179e-07	0.0190468
1624	1.41742e-05	3.21552e-06	2.14368e-06	0.0472474
1625	8.33446e-06	1.89073e-06	1.26049e-06	0.0277815
1626	6.84748e-06	1.5534e-06	1.0356e-06	0.0228249
1627	4.21994e-06	9.57323e-07	6.38215e-07	0.0140665
1628	4.04374e-06	9.17351e-07	6.11567e-07	0.0134791
1629	1.66666e-05	3.78094e-06	2.52062e-06	0.0555553
1630	6.14107e-06	1.39315e-06	9.28764e-07	0.0204702
1631	5.76954e-06	1.30886e-06	8.72574e-07	0.0192318
1632	5.69256e-06	1.2914e-06	8.60932e-07	0.0189752
1633	4.2401e-06	9.61897e-07	6.41265e-07	0.0141337
1634	1.29407e-05	2.93569e-06	1.95713e-06	0.0431357
1635	4.71572e-06	1.06979e-06	7.13196e-07	0.0157191
1636	8.95093e-06	2.03058e-06	1.35372e-06	0.0298364
1637	1.22347e-06	2.77553e-07	1.85036e-07	0.00407824
1638	1.29646e-05	2.9411e-06	1.96074e-06	0.0432152
1639	8.86354e-07	2.01076e-07	1.3405e-07	0.00295451
1640	1.39821e-05	3.17194e-06	2.11463e-06	0.046607
1641	2.09583e-06	4.75455e-07	3.1697e-07	0.00698611
1642	4.95897e-06	1.12498e-06	7.49985e-07	0.0165299
1643	3.83478e-06	8.69947e-07	5.79965e-07	0.0127826
1644	1.00379e-05	2.27718e-06	1.51812e-06	0.0334598
1645	1.03753e-05	2.35371e-06	1.56914e-06	0.0345843
1646	1.03235e-05	2.34197e-06	1.56131e-06	0.0344118
1647	2.06144e-05	4.67652e-06	3.11768e-06	0.0687146
1648	1.09133e-05	2.47577e-06	1.65051e-06	0.0363778
1649	1.27321e-05	2.88838e-06	1.92558e-06	0.0424404
1650	7.36813e-06	1.67151e-06	1.11434e-06	0.0245604
1651	4.25488e-06	9.65249e-07	6.43499e-07	0.0141829
1652	6.21422e-06	1.40974e-06	9.39826e-07	0.0207141
1653	4.26571e-06	9.67707e-07	6.45138e-07	0.014219
1654	2.48555e-06	5.63865e-07	3.7591e-07	0.00828517
1655	2.13466e-05	4.84264e-06	3.22842e-06	0.0711554
1656	6.20838e-06	1.40841e-06	9.38943e-07	0.0206946
1657	1.31353e-05	2.97984e-06	1.98656e-06	0.0437844
1658	3.05072e-06	6.92078e-07	4.61386e-07	0.0101691
1659	6.45701e-06	1.46482e-06	9.76547e-07	0.0215234
1660	6.09074e-06	1.38173e-06	9.21152e-07	0.0203025
1661	7.57992e-06	1.71956e-06	1.14637e-06	0.0252664
1662	1.64887e-05	3.74058e-06	2.49372e-06	0.0549623
1663	1.05182e-05	2.38613e-06	1.59075e-06	0.0350607
1664	1.52329e-05	3.45568e-06	2.30379e-06	0.0507762
1665	7.72592e-06	1.75268e-06	1.16845e-06	0.0257531
1666	4.12609e-06	9.36033e-07	6.24022e-07	0.0137536
1667	6.00776e-06	1.3629e-06	9.08603e-07	0.0200259
1668	6.82619e-06	1.54857e-06	1.03238e-06	0.022754
1669	2.35415e-06	5.34055e-07	3.56037e-07	0.00784716
1670	1.58844e-05	3.60349e-06	2.40233e-06	0.052948
1671	7.23135e-06	1.64048e-06	1.09366e-06	0.0241045
1672	2.40896e-06	5.46489e-07	3.64326e-07	0.00802986
1673	2.73231e-06	6.19845e-07	4.1323e-07	0.00910771
1674	1.2872e-05	2.92011e-06	1.94674e-06	0.0429067
1675	5.97245e-06	1.35489e-06	9.03262e-07	0.0199082
1676	8.24021e-06	1.86935e-06	1.24623e-06	0.0274674
1677	1.71795e-05	3.89729e-06	2.59819e-06	0.0572649
1678	6.72784e-06	1.52626e-06	1.01751e-06	0.0224261
1679	8.60744e-06	1.95266e-06	1.30177e-06	0.0286915
1680	8.03644e-06	1.82312e-06	1.21542e-06	0.0267881
1681	3.97119e-06	9.00893e-07	6.00595e-07	0.0132373
1682	6.72612e-06	1.52587e-06	1.01725e-06	0.0224204
1683	5.29908e-06	1.20213e-06	8.01422e-07	0.0176636
1684	4.96467e-06	1.12627e-06	7.50848e-07	0.0165489
1685	8.8485e-06	2.00735e-06	1.33823e-06	0.029495
1686	6.53546e-06	1.48262e-06	9.8841e-07	0.0217849
1687	6.6544e-06	1.5096e-06	1.0064e-06	0.0221813
1688	4.19588e-06	9.51865e-07	6.34577e-07	0.0139863
1689	6.07899e-06	1.37906e-06	9.19375e-07	0.0202633
1690	4.32284e-06	9.80668e-07	6.53779e-07	0.0144095
1691	1.47154e-05	3.3383e-06	2.22554e-06	0.0490515
1692	9.0444e-06	2.05179e-06	1.36786e-06	0.030148
1693	1.16885e-05	2.65161e-06	1.76774e-06	0.0389615
1694	6.52958e-06	1.48128e-06	9.87522e-07	0.0217653
1695	5.43601e-06	1.2332e-06	8.22133e-07	0.01812
1696	1.13354e-05	2.57153e-06	1.71435e-06	0.0377848
1697	1.36193e-05	3.08964e-06	2.05976e-06	0.0453978
1698	7.51145e-06	1.70403e-06	1.13602e-06	0.0250382
1699	4.75657e-06	1.07906e-06	7.19374e-07	0.0158552
1700	2.89578e-06	6.56928e-07	4.37952e-07	0.0096526
1701	7.82172e-06	1.77441e-06	1.18294e-06	0.0260724
1702	9.10293e-06	2.06506e-06	1.37671e-06	0.0303431
1703	7.12357e-06	1.61603e-06	1.07735e-06	0.0237452
1704	7.4753e-06	1.69582e-06	1.13055e-06	0.0249177
1705	1.42298e-05	3.22814e-06	2.15209e-06	0.0474328
1706	6.25256e-06	1.41844e-06	9.45626e-07	0.0208419
1707	1.0855e-05	2.46255e-06	1.6417e-06	0.0361835
1708	6.62398e-06	1.5027e-06	1.0018e-06	0.0220799
1709	1.14713e-05	2.60234e-06	1.73489e-06	0.0382375
1710	1.07263e-05	2.43333e-06	1.62222e-06	0.0357542
1711	4.34304e-06	9.8525e-07	6.56833e-07	0.0144768
1712	1.24362e-05	2.82123e-06	1.88082e-06	0.0414539
1713	4.78862e-06	1.08633e-06	7.24222e-07	0.0159621
1714	1.03808e-05	2.35496e-06	1.56998e-06	0.0346027
1715	4.10328e-06	9.30858e-07	6.20572e-07	0.0136776
1716	9.01204e-06	2.04445e-06	1.36296e-06	0.0300401
1717	3.12311e-06	7.085e-07	4.72334e-07	0.0104104
1718	4.94874e-06	1.12266e-06	7.48438e-07	0.0164958
1719	6.97783e-06	1.58297e-06	1.05531e-06	0.0232594
1720	1.2768e-06	2.89651e-07	1.93101e-07	0.004256
1721	5.4828e-06	1.24381e-06	8.29209e-07	0.018276
1722	8.43345e-06	1.91319e-06	1.27546e-06	0.0281115
1723	5.8422e-06	1.32534e-06	8.83563e-07	0.019474
1724	3.19011e-06	7.23698e-07	4.82466e-07	0.0106337
1725	1.44553e-05	3.27928e-06	2.18619e-06	0.0481842
1726	7.09024e-06	1.60847e-06	1.07231e-06	0.0236341
1727	5.83813e-06	1.32442e-06	8.82947e-07	0.0194604
1728	9.43095e-06	2.13948e-06	1.42632e-06	0.0314365
1729	1.58377e-05	3.59291e-06	2.39527e-06	0.0527925
1730	7.77324e-06	1.76341e-06	1.17561e-06	0.0259108
1731	8.6384e-06	1.95968e-06	1.30645e-06	0.0287947
1732	1.39704e-05	3.16929e-06	2.11286e-06	0.0465681
1733	1.09649e-05	2.48747e-06	1.65831e-06	0.0365497
1734	1.13702e-05	2.57941e-06	1.71961e-06	0.0379006
1735	7.3934e-06	1.67725e-06	1.11816e-06	0.0246447
1736	6.09445e-06	1.38257e-06	9.21714e-07	0.0203148
1737	1.55171e-05	3.52017e-06	2.34678e-06	0.0517238
1738	9.56566e-06	2.17004e-06	1.44669e-06	0.0318855
1739	6.9519e-06	1.57709e-06	1.05139e-06	0.023173
1740	9.01254e-06	2.04456e-06	1.36304e-06	0.0300418
1741	5.25127e-06	1.19129e-06	7.94191e-07	0.0175042
1742	7.18105e-06	1.62907e-06	1.08605e-06	0.0239368
1743	9.78673e-06	2.22019e-06	1.48013e-06	0.0326224
1744	2.01687e-05	4.57542e-06	3.05028e-06	0.0672291
1745	3.74947e-06	8.50594e-07	5.67063e-07	0.0124982
1746	3.19559e-06	7.24943e-07	4.83295e-07	0.010652
1747	8.86087e-06	2.01015e-06	1.3401e-06	0.0295362
1748	5.54806e-06	1.25862e-06	8.39078e-07	0.0184935
1749	1.65944e-05	3.76456e-06	2.50971e-06	0.0553147
1750	5.28889e-06	1.19982e-06	7.99882e-07	0.0176296
1751	8.31746e-06	1.88688e-06	1.25792e-06	0.0277249
1752	6.59115e-06	1.49525e-06	9.96832e-07	0.0219705
1753	6.59263e-06	1.49558e-06	9.97057e-07	0.0219754
1754	1.96636e-05	4.46084e-06	2.97389e-06	0.0655455
1755	3.11845e-06	7.07444e-07	4.71629e-07	0.0103948
1756	2.52789e-05	5.73471e-06	3.82314e-06	0.0842632
1757	6.65497e-06	1.50973e-06	1.00648e-06	0.0221832
1758	7.4211e-06	1.68353e-06	1.12235e-06	0.024737
1759	9.48695e-06	2.15218e-06	1.43479e-06	0.0316232
1760	9.32215e-06	2.1148e-06	1.40986e-06	0.0310738
1761	1.24821e-05	2.83165e-06	1.88777e-06	0.041607
1762	6.60291e-06	1.49792e-06	9.98612e-07	0.0220097
1763	1.11081e-05	2.51996e-06	1.67997e-06	0.0370271
1764	8.16654e-06	1.85264e-06	1.23509e-06	0.0272218
1765	6.93241e-06	1.57267e-06	1.04844e-06	0.023108
1766	8.52444e-06	1.93383e-06	1.28922e-06	0.0284148
1767	2.15032e-05	4.87815e-06	3.2521e-06	0.0716772
1768	9.44074e-06	2.1417e-06	1.4278e-06	0.0314691
1769	1.0695e-05	2.42623e-06	1.61749e-06	0.03565
1770	1.84665e-06	4.18926e-07	2.79284e-07	0.0061555
1771	1.68023e-05	3.81172e-06	2.54115e-06	0.0560076
1772	7.07028e-06	1.60394e-06	1.0693e-06	0.0235676
1773	1.38853e-06	3.14998e-07	2.09999e-07	0.00462844
1774	4.62657e-06	1.04957e-06	6.99714e-07	0.0154219
1775	4.45485e-06	1.01061e-06	6.73742e-07	0.0148495
1776	1.90732e-06	4.3269e-07	2.8846e-07	0.00635775
1777	1.98901e-06	4.51222e-07	3.00815e-07	0.00663005
1778	5.50137e-06	1.24803e-06	8.32017e-07	0.0183379
1779	6.7998e-06	1.54258e-06	1.02839e-06	0.022666
1780	6.61304e-06	1.50022e-06	1.00014e-06	0.0220435
1781	1.65325e-05	3.75052e-06	2.50035e-06	0.0551084
1782	7.63512e-06	1.73208e-06	1.15472e-06	0.0254504
1783	2.81455e-06	6.385e-07	4.25667e-07	0.00938182
1784	1.70309e-05	3.86359e-06	2.57573e-06	0.0567698
1785	9.83155e-06	2.23036e-06	1.4869e-06	0.0327718
1786	6.56092e-06	1.48839e-06	9.92262e-07	0.0218697
1787	5.99415e-06	1.35981e-06	9.06543e-07	0.0199805
1788	6.02062e-06	1.36582e-06	9.10548e-07	0.0200687
1789	8.77737e-06	1.99121e-06	1.32747e-06	0.0292579
1790	5.80667e-06	1.31728e-06	8.78189e-07	0.0193556
1791	7.04365e-06	1.5979e-06	1.06527e-06	0.0234788
1792	3.12973e-06	7.10002e-07	4.73335e-07	0.0104324
1793	3.01609e-06	6.84222e-07	4.56148e-07	0.0100536
1794	1.25064e-05	2.83718e-06	1.89145e-06	0.0416881
1795	3.90552e-06	8.85995e-07	5.90663e-07	0.0130184
1796	9.37733e-06	2.12731e-06	1.41821e-06	0.0312578
1797	8.08916e-06	1.83508e-06	1.22339e-06	0.0269639
1798	3.28366e-06	7.44922e-07	4.96615e-07	0.0109455
1799	5.91698e-06	1.34231e-06	8.94872e-07	0.0197233
1800	3.98332e-06	9.03645e-07	6.0243e-07	0.0132777
1801	1.75957e-05	3.9917e-06	2.66113e-06	0.0586522
1802	9.78415e-06	2.21961e-06	1.47974e-06	0.0326138
1803	3.38583e-06	7.68099e-07	5.12066e-07	0.0112861
1804	1.50487e-05	3.4139e-06	2.27594e-06	0.0501623
1805	7.19523e-06	1.63229e-06	1.08819e-06	0.0239841
1806	2.75453e-06	6.24885e-07	4.1659e-07	0.00918178
1807	1.10673e-05	2.51071e-06	1.6738e-06	0.0368912
1808	4.43096e-06	1.00519e-06	6.7013e-07	0.0147699
1809	1.00551e-05	2.28107e-06	1.52071e-06	0.033517
1810	9.992e-06	2.26676e-06	1.51117e-06	0.0333067
1811	3.82275e-06	8.67218e-07	5.78146e-07	0.0127425
1812	3.39965e-06	7.71234e-07	5.14156e-07	0.0113322
1813	7.93334e-06	1.79973e-06	1.19982e-06	0.0264445
1814	1.86833e-05	4.23843e-06	2.82562e-06	0.0622776
1815	5.42536e-06	1.23078e-06	8.20521e-07	0.0180845
1816	1.53468e-05	3.48152e-06	2.32102e-06	0.0511559
1817	6.69466e-06	1.51873e-06	1.01249e-06	0.0223155
1818	7.73728e-06	1.75526e-06	1.17017e-06	0.0257909
1819	1.78403e-06	4.0472e-07	2.69813e-07	0.00594676
1820	1.457e-05	3.30532e-06	2.20354e-06	0.0485668
1821	8.63599e-06	1.95914e-06	1.30609e-06	0.0287866
1822	4.97303e-06	1.12817e-06	7.52111e-07	0.0165768
1823	9.405e-06	2.13359e-06	1.42239e-06	0.03135
1824	4.13157e-05	9.37276e-06	6.24851e-06	0.137719
1825	1.95676e-05	4.43906e-06	2.95937e-06	0.0652254
1826	5.00236e-06	1.13482e-06	7.56548e-07	0.0166745
1827	1.2224e-05	2.77309e-06	1.84873e-06	0.0407465
1828	7.0207e-06	1.5927e-06	1.0618e-06	0.0234023
1829	6.55542e-06	1.48714e-06	9.9143e-07	0.0218514
1830	2.07465e-05	4.70648e-06	3.13766e-06	0.0691549
1831	8.49621e-06	1.92743e-06	1.28495e-06	0.0283207
1832	8.7336e-06	1.98128e-06	1.32085e-06	0.029112
1833	2.85587e-06	6.47874e-07	4.31916e-07	0.00951955
1834	6.85466e-06	1.55503e-06	1.03669e-06	0.0228489
1835	5.03656e-06	1.14258e-06	7.6172e-07	0.0167885
1836	1.02325e-05	2.32132e-06	1.54755e-06	0.0341084
1837	1.55173e-05	3.5202e-06	2.3468e-06	0.0517242
1838	1.55011e-05	3.51653e-06	2.34435e-06	0.0516703
1839	8.01361e-06	1.81795e-06	1.21196e-06	0.026712
1840	1.16334e-05	2.63911e-06	1.75941e-06	0.0387778
1841	2.22304e-06	5.04312e-07	3.36208e-07	0.00741012
1842	5.11172e-06	1.15963e-06	7.73086e-07	0.0170391
1843	1.49632e-05	3.39451e-06	2.26301e-06	0.0498774
1844	1.55472e-05	3.52698e-06	2.35132e-06	0.0518238
1845	2.87648e-06	6.5255e-07	4.35033e-07	0.00958826
1846	7.15286e-06	1.62268e-06	1.08178e-06	0.0238429
1847	2.62934e-05	5.96484e-06	3.97656e-06	0.0876446
1848	1.49841e-05	3.39925e-06	2.26617e-06	0.049947
1849	6.54634e-06	1.48508e-06	9.90055e-07	0.0218211
1850	8.30052e-07	1.88303e-07	1.25536e-07	0.00276684
1851	7.5084e-06	1.70333e-06	1.13556e-06	0.025028
1852	6.40026e-06	1.45194e-06	9.67963e-07	0.0213342
1853	8.27403e-06	1.87702e-06	1.25135e-06	0.0275801
1854	5.20042e-06	1.17975e-06	7.86501e-07	0.0173347
1855	4.04616e-06	9.179e-07	6.11933e-07	0.0134872
1856	1.55639e-05	3.53078e-06	2.35385e-06	0.0518796
1857	6.09943e-06	1.3837e-06	9.22466e-07	0.0203314
1858	8.27916e-06	1.87819e-06	1.25212e-06	0.0275972
1859	2.52793e-06	5.7348e-07	3.8232e-07	0.00842645
1860	1.52629e-05	3.46249e-06	2.30832e-06	0.0508762
1861	8.2215e-06	1.86511e-06	1.2434e-06	0.027405
1862	2.11894e-05	4.80697e-06	3.20465e-06	0.0706314
1863	1.80271e-06	4.08957e-07	2.72638e-07	0.00600903
1864	9.16086e-06	2.07821e-06	1.38547e-06	0.0305362
1865	1.5062e-06	3.41692e-07	2.27795e-07	0.00502067
1866	5.48616e-06	1.24457e-06	8.29716e-07	0.0182872
1867	6.45634e-06	1.46467e-06	9.76445e-07	0.0215211
1868	1.1745e-05	2.66443e-06	1.77629e-06	0.0391499
1869	1.26246e-05	2.86398e-06	1.90932e-06	0.0420819
1870	4.98924e-06	1.13185e-06	7.54563e-07	0.0166308
1871	1.41898e-05	3.21905e-06	2.14604e-06	0.0472993
1872	5.5167e-06	1.2515e-06	8.34335e-07	0.018389
1873	1.31887e-05	2.99195e-06	1.99463e-06	0.0439623
1874	6.41572e-06	1.45545e-06	9.70302e-07	0.0213857
1875	1.23321e-06	2.79762e-07	1.86508e-07	0.0041107
1876	6.61303e-06	1.50021e-06	1.00014e-06	0.0220434
1877	1.13142e-05	2.5667e-06	1.71113e-06	0.0377139
1878	5.0722e-06	1.15067e-06	7.6711e-07	0.0169073
1879	6.7513e-06	1.53158e-06	1.02105e-06	0.0225043
1880	1.94465e-06	4.41157e-07	2.94105e-07	0.00648216
1881	1.08621e-05	2.46415e-06	1.64277e-06	0.036207
1882	8.42175e-06	1.91053e-06	1.27369e-06	0.0280725
1883	6.95423e-06	1.57762e-06	1.05174e-06	0.0231808
1884	5.08271e-06	1.15305e-06	7.68699e-07	0.0169424
1885	6.83114e-06	1.54969e-06	1.03313e-06	0.0227705
1886	1.04692e-05	2.37502e-06	1.58335e-06	0.0348975
1887	8.44929e-06	1.91678e-06	1.27785e-06	0.0281643
1888	4.94185e-06	1.12109e-06	7.47395e-07	0.0164728
1889	6.38439e-06	1.44834e-06	9.65563e-07	0.0212813
1890	1.0029e-05	2.27514e-06	1.51676e-06	0.0334299
1891	7.22501e-06	1.63905e-06	1.0927e-06	0.0240834
1892	4.73047e-06	1.07314e-06	7.15427e-07	0.0157682
1893	8.12417e-06	1.84303e-06	1.22868e-06	0.0270806
1894	1.31491e-05	2.98296e-06	1.98864e-06	0.0438303
1895	1.15985e-05	2.63121e-06	1.75414e-06	0.0386618
1896	4.10049e-06	9.30225e-07	6.2015e-07	0.0136683
1897	1.41251e-05	3.20438e-06	2.13625e-06	0.0470837
1898	2.39527e-05	5.43384e-06	3.62256e-06	0.0798423
1899	6.50652e-06	1.47605e-06	9.84034e-07	0.0216884
1900	7.09183e-06	1.60883e-06	1.07256e-06	0.0236394
1901	7.81647e-06	1.77322e-06	1.18215e-06	0.0260549
1902	6.2249e-06	1.41216e-06	9.41441e-07	0.0207497
1903	9.56187e-06	2.16918e-06	1.44612e-06	0.0318729
1904	1.50926e-05	3.42386e-06	2.28257e-06	0.0503086
1905	1.53199e-05	3.47544e-06	2.31696e-06	0.0510665
1906	3.02162e-06	6.85475e-07	4.56984e-07	0.0100721
1907	6.57631e-06	1.49188e-06	9.94589e-07	0.021921
1908	7.93107e-06	1.79922e-06	1.19948e-06	0.0264369
1909	8.23767e-06	1.86877e-06	1.24585e-06	0.0274589
1910	1.12831e-05	2.55966e-06	1.70644e-06	0.0376104
1911	8.41355e-06	1.90867e-06	1.27245e-06	0.0280452
1912	2.2512e-06	5.107e-07	3.40466e-07	0.00750398
1913	2.37702e-06	5.39244e-07	3.59496e-07	0.0079234
1914	6.4987e-06	1.47428e-06	9.82851e-07	0.0216623
1915	1.91868e-06	4.35267e-07	2.90178e-07	0.00639561
1916	1.22148e-06	2.77101e-07	1.84734e-07	0.0040716
1917	1.07404e-05	2.43654e-06	1.62436e-06	0.0358013
1918	1.28823e-05	2.92244e-06	1.94829e-06	0.042941
1919	1.574e-05	3.57074e-06	2.38049e-06	0.0524668
1920	5.6347e-06	1.27827e-06	8.52181e-07	0.0187823
1921	2.20902e-06	5.01133e-07	3.34088e-07	0.00736341
1922	8.61847e-06	1.95516e-06	1.30344e-06	0.0287282
1923	7.00371e-06	1.58884e-06	1.05923e-06	0.0233457
1924	5.28191e-06	1.19824e-06	7.98827e-07	0.0176064
1925	6.99716e-06	1.58735e-06	1.05824e-06	0.0233239
1926	1.08189e-05	2.45434e-06	1.63623e-06	0.0360629
1927	3.9204e-06	8.8937e-07	5.92913e-07	0.013068
1928	1.97436e-05	4.47897e-06	2.98598e-06	0.0658119
1929	2.20448e-05	5.00103e-06	3.33402e-06	0.0734827
1930	7.0868e-06	1.60769e-06	1.07179e-06	0.0236227
1931	9.09015e-06	2.06217e-06	1.37478e-06	0.0303005
1932	1.17076e-05	2.65595e-06	1.77064e-06	0.0390253
1933	1.04069e-05	2.36089e-06	1.57392e-06	0.0346898
1934	2.70886e-06	6.14523e-07	4.09682e-07	0.00902952
1935	2.33433e-06	5.2956e-07	3.5304e-07	0.0077811
1936	3.84394e-06	8.72026e-07	5.81351e-07	0.0128131
1937	6.02086e-06	1.36588e-06	9.10584e-07	0.0200695
1938	3.86201e-06	8.76125e-07	5.84083e-07	0.0128734
1939	1.15276e-05	2.61511e-06	1.74341e-06	0.0384252
1940	1.15857e-05	2.62829e-06	1.7522e-06	0.0386189
1941	2.49822e-06	5.6674e-07	3.77827e-07	0.00832742
1942	8.93638e-06	2.02728e-06	1.35152e-06	0.0297879
1943	1.03871e-05	2.35638e-06	1.57092e-06	0.0346235
1944	1.05095e-05	2.38415e-06	1.58943e-06	0.0350315
1945	1.01397e-05	2.30027e-06	1.53351e-06	0.0337991
1946	2.76164e-05	6.26497e-06	4.17665e-06	0.0920546
1947	1.96617e-06	4.4604e-07	2.9736e-07	0.0065539
1948	2.08043e-05	4.7196e-06	3.1464e-06	0.0693476
1949	7.20822e-06	1.63524e-06	1.09016e-06	0.0240274
1950	1.32196e-05	2.99895e-06	1.9993e-06	0.0440652
1951	8.19002e-06	1.85796e-06	1.23864e-06	0.0273001
1952	7.34554e-06	1.66639e-06	1.11093e-06	0.0244851
1953	1.09804e-05	2.49099e-06	1.66066e-06	0.0366014
1954	4.62305e-06	1.04877e-06	6.99181e-07	0.0154102
1955	3.45346e-06	7.83442e-07	5.22295e-07	0.0115115
1956	2.58953e-06	5.87455e-07	3.91636e-07	0.00863178
1957	7.85595e-06	1.78218e-06	1.18812e-06	0.0261865
1958	2.00476e-05	4.54794e-06	3.03196e-06	0.0668253
1959	4.52078e-06	1.02557e-06	6.83714e-07	0.0150693
1960	8.95677e-06	2.03191e-06	1.35461e-06	0.0298559
1961	7.37884e-06	1.67394e-06	1.11596e-06	0.0245961
1962	3.33729e-06	7.57087e-07	5.04725e-07	0.0111243
1963	1.72084e-05	3.90385e-06	2.60257e-06	0.0573614
1964	7.842e-06	1.77901e-06	1.18601e-06	0.02614
1965	4.97367e-06	1.12831e-06	7.52208e-07	0.0165789
1966	5.64165e-06	1.27985e-06	8.53233e-07	0.0188055
1967	3.97997e-06	9.02885e-07	6.01923e-07	0.0132666
1968	2.29859e-05	5.21451e-06	3.47634e-06	0.0766196
1969	8.43751e-06	1.91411e-06	1.27607e-06	0.028125
1970	6.7126e-06	1.5228e-06	1.0152e-06	0.0223753
1971	7.52211e-06	1.70645e-06	1.13763e-06	0.0250737
1972	1.11361e-05	2.5263e-06	1.6842e-06	0.0371203
1973	3.6868e-06	8.36378e-07	5.57585e-07	0.0122893
1974	1.08798e-05	2.46816e-06	1.64544e-06	0.036266
1975	8.65025e-06	1.96237e-06	1.30825e-06	0.0288342
1976	8.04736e-06	1.8256e-06	1.21707e-06	0.0268245
1977	1.13525e-06	2.57539e-07	1.71692e-07	0.00378415
1978	7.02079e-06	1.59272e-06	1.06181e-06	0.0234026
1979	7.45373e-06	1.69093e-06	1.12729e-06	0.0248458
1980	1.29815e-05	2.94496e-06	1.9633e-06	0.0432718
1981	9.22479e-06	2.09271e-06	1.39514e-06	0.0307493
1982	7.381e-06	1.67443e-06	1.11629e-06	0.0246033
1983	9.75118e-06	2.21212e-06	1.47475e-06	0.0325039
1984	4.59888e-06	1.04329e-06	6.95526e-07	0.0153296
1985	5.20572e-06	1.18095e-06	7.87303e-07	0.0173524
1986	1.48285e-06	3.36394e-07	2.24263e-07	0.00494282
1987	1.888e-05	4.28306e-06	2.85537e-06	0.0629333
1988	9.96192e-06	2.25993e-06	1.50662e-06	0.0332064
1989	6.12311e-06	1.38907e-06	9.26048e-07	0.0204104
1990	4.05361e-06	9.1959e-07	6.1306e-07	0.013512
1991	5.46425e-06	1.2396e-06	8.26403e-07	0.0182142
1992	1.04028e-05	2.35994e-06	1.5733e-06	0.0346759
1993	9.21793e-06	2.09115e-06	1.3941e-06	0.0307264
1994	4.0309e-06	9.14438e-07	6.09626e-07	0.0134363
1995	4.36515e-06	9.90266e-07	6.60177e-07	0.0145505
1996	4.66078e-06	1.05733e-06	7.04887e-07	0.0155359
1997	1.11916e-05	2.53888e-06	1.69259e-06	0.0373052
1998	5.31806e-06	1.20644e-06	8.04293e-07	0.0177269
1999	1.35435e-05	3.07244e-06	2.0483e-06	0.045145
[truncated: 8,001 more rows]
