# Supplementary material for: Health risk assessment from habitants of Araró, Michoacán, México, exposed to arsenic by dust, using Monte Carlo probabilistic method
Source: PeerJ. 2025 Jun 10;13:e18805. doi: 10.7717/peerj.18805 (PMC12164815; doi:10.7717/peerj.18805)
Supplement: Supplemental Information 8 [file peerj-13-18805-s008.xlsx]

## Sheet: Risk Premises
Study Title:	Dermico premisas simulación.					Last simulation run:
Study File:	Dermico premisas simulación.xlsx					2022-11-04 21:11:30
	Output Cells	Histogram settings				Multi-cell output range names
Description for Reports	Range Names	Min value	Max value	Step size		title row or column (optional)
	ADD	Auto	Auto	Auto
	ADDc	Auto	Auto	Auto
	CR	Auto	Auto	Auto
	HQ	Auto	Auto	Auto
		Study	Min				Max
	Input Cells	File	Allowed		Expected		Allowed
Description for Reports	Range Names	Values	Values	10/90	Values	90/10	Values	Distributions	Parameters and chart settings
	BW	33.81	8.9	20.3513	34.1459	47.9418	96.65	Normal	Mean	33.81	std dev	10.9688	X Axis Min	auto	X Axis Max	auto
	Conc	15.6	5.94	10.1171	15.7996	21.5085	42.53	Normal	Mean	15.6	std dev	4.57375	X Axis Min	auto	X Axis Max	auto
	ED	8.82	6	7.85888	8.82022	9.78155	12	Normal	Mean	8.82	std dev	0.75	X Axis Min	auto	X Axis Max	auto

## Sheet: Simulation Summary
	10000	Simulations run
					Change in expected values as simulations increase									Change in standard deviation as simulations increase
	Minimum result	Maximum result	Expected value	Std deviation	125	250	500	1000	2000	4000	8000	10000		125	250	500	1000	2000	4000	8000	10000
ADD	1.29453e-05	0.000361301	6.75206e-05	3.51724e-05	-	0.0113681	0.00614403	-0.0194812	0.0104466	-0.00213194	-0.00637312	-0.00141929		-	0.0751507	0.110833	-0.0579061	0.0353946	-0.0273436	-0.00845525	-0.00664784
ADDc	1.56714e-06	4.37387e-05	8.17396e-06	4.25792e-06	-	0.0113681	0.00614403	-0.0194812	0.0104466	-0.00213194	-0.00637312	-0.00141929		-	0.0751507	0.110833	-0.0579061	0.0353946	-0.0273436	-0.00845525	-0.00664784
CR	1.04476e-06	2.91591e-05	5.44931e-06	2.83862e-06	-	0.0113681	0.00614403	-0.0194812	0.0104466	-0.00213194	-0.00637312	-0.00141929		-	0.0751507	0.110833	-0.0579061	0.0353946	-0.0273436	-0.00845525	-0.00664784
HQ	0.0431509	1.20434	0.225069	0.117241	-	0.0113681	0.00614403	-0.0194812	0.0104466	-0.00213194	-0.00637312	-0.00141929		-	0.0751507	0.110833	-0.0579061	0.0353946	-0.0273436	-0.00845525	-0.00664784

## Sheet: Simulation variance
This worksheet shows the convergence of the output variables as a function of the number of simulations
You should run enough simulations until the % change is very small, typically < 1.0%
ADD
	# of Sims	125	250	500	1000	2000	4000	8000	10000
	Avg Value	6.76422e-05	6.84112e-05	6.88315e-05	6.74906e-05	6.81956e-05	6.80502e-05	6.76165e-05	6.75206e-05
	% Chg		0.0113681	0.00614403	-0.0194812	0.0104466	-0.00213194	-0.00637312	-0.00141929
	Std Dev.	3.15143e-05	3.38827e-05	3.7638e-05	3.54585e-05	3.67136e-05	3.57097e-05	3.54077e-05	3.51724e-05
	% Chg		0.0751507	0.110833	-0.0579061	0.0353946	-0.0273436	-0.00845525	-0.00664784
ADDc
	# of Sims	125	250	500	1000	2000	4000	8000	10000
	Avg Value	8.18868e-06	8.28177e-06	8.33266e-06	8.17033e-06	8.25568e-06	8.23808e-06	8.18558e-06	8.17396e-06
	% Chg		0.0113681	0.00614403	-0.0194812	0.0104466	-0.00213194	-0.00637312	-0.00141929
	Std Dev.	3.81509e-06	4.10179e-06	4.55641e-06	4.29257e-06	4.4445e-06	4.32297e-06	4.28642e-06	4.25792e-06
	% Chg		0.0751507	0.110833	-0.0579061	0.0353946	-0.0273436	-0.00845525	-0.00664784
CR
	# of Sims	125	250	500	1000	2000	4000	8000	10000
	Avg Value	5.45912e-06	5.52118e-06	5.5551e-06	5.44688e-06	5.50379e-06	5.49205e-06	5.45705e-06	5.44931e-06
	% Chg		0.0113681	0.00614403	-0.0194812	0.0104466	-0.00213194	-0.00637312	-0.00141929
	Std Dev.	2.54339e-06	2.73453e-06	3.03761e-06	2.86171e-06	2.963e-06	2.88198e-06	2.85761e-06	2.83862e-06
	% Chg		0.0751507	0.110833	-0.0579061	0.0353946	-0.0273436	-0.00845525	-0.00664784
HQ
	# of Sims	125	250	500	1000	2000	4000	8000	10000
	Avg Value	0.225474	0.228037	0.229438	0.224969	0.227319	0.226834	0.225388	0.225069
	% Chg		0.0113681	0.00614403	-0.0194812	0.0104466	-0.00213194	-0.00637312	-0.00141929
	Std Dev.	0.105048	0.112942	0.12546	0.118195	0.122379	0.119032	0.118026	0.117241
	% Chg		0.0751507	0.110833	-0.0579061	0.0353946	-0.0273436	-0.00845525	-0.00664784

## Sheet: ADD Results
ADD Results
Minimum result	1.29453e-05				5.97977e-05	Study value
Maximum result	0.000361301				0.4987	of results are equal or lower
Expected value	6.75206e-05				0.5013	of results are equal or greater
Std Deviation	3.51724e-05
Out of 10000 simulations		Of those with numeric values:
10000 had numeric values.			5% <=	2.84097e-05
0 had error values.			10% <=	3.40287e-05
			15% <=	3.80308e-05
			20% <=	4.14291e-05
			25% <=	4.4663e-05
			30% <=	4.76278e-05
			35% <=	5.05447e-05
			40% <=	5.35139e-05
			45% <=	5.67036e-05
			50% <=	5.99108e-05
			55% <=	6.34574e-05
			60% <=	6.71452e-05
			65% <=	7.12678e-05
			70% <=	7.56402e-05
			75% <=	8.11813e-05
			80% <=	8.76869e-05
			85% <=	9.60594e-05
			90% <=	0.00010766
			95% <=	0.000130104
			100% <=	0.000361301
If ADD is:				5.97977e-05	0.4987	of results are equal or lower
(Chg to do what ifs)					0.5013	of results are greater
					Cumulative				Cumulative
ADD	frequency:				frequency:				frequency:
<=1.29453E-05	1	0.0001		<=1.29453E-05	1	0.0001		=>1.29453E-05	10000	1
1.29453E-05 to 3.12798E-05	741	0.0741		<=3.12798E-05	742	0.0742		=>3.12798E-05	9258	0.9258
3.12798E-05 to 4.96143E-05	2585	0.2585		<=4.96143E-05	3327	0.3327		=>4.96143E-05	6673	0.6673
4.96143E-05 to 6.79488E-05	2768	0.2768		<=6.79488E-05	6095	0.6095		=>6.79488E-05	3905	0.3905
6.79488E-05 to 8.62833E-05	1807	0.1807		<=8.62833E-05	7902	0.7902		=>8.62833E-05	2098	0.2098
8.62833E-05 to 0.000104618	991	0.0991		<=0.000104618	8893	0.8893		=>0.000104618	1107	0.1107
0.000104618 to 0.000122952	491	0.0491		<=0.000122952	9384	0.9384		=>0.000122952	616	0.0616
0.000122952 to 0.000141287	244	0.0244		<=0.000141287	9628	0.9628		=>0.000141287	372	0.0372
0.000141287 to 0.000159621	122	0.0122		<=0.000159621	9750	0.975		=>0.000159621	250	0.025
0.000159621 to 0.000177956	87	0.0087		<=0.000177956	9837	0.9837		=>0.000177956	163	0.0163
0.000177956 to 0.00019629	51	0.0051		<=0.00019629	9888	0.9888		=>0.00019629	112	0.0112
0.00019629 to 0.000214625	34	0.0034		<=0.000214625	9922	0.9922		=>0.000214625	78	0.0078
0.000214625 to 0.000232959	34	0.0034		<=0.000232959	9956	0.9956		=>0.000232959	44	0.0044
0.000232959 to 0.000251294	11	0.0011		<=0.000251294	9967	0.9967		=>0.000251294	33	0.0033
0.000251294 to 0.000269628	10	0.001		<=0.000269628	9977	0.9977		=>0.000269628	23	0.0023
0.000269628 to 0.000287963	5	0.0005		<=0.000287963	9982	0.9982		=>0.000287963	18	0.0018
0.000287963 to 0.000306297	7	0.0007		<=0.000306297	9989	0.9989		=>0.000306297	11	0.0011
0.000306297 to 0.000324632	3	0.0003		<=0.000324632	9992	0.9992		=>0.000324632	8	0.0008
0.000324632 to 0.000342966	6	0.0006		<=0.000342966	9998	0.9998		=>0.000342966	2	0.0002
0.000342966 to 0.000361301	2	0.0002		<=0.000361301	10000	1		=>0.000361301	1	0.0001
>0.000361301	0	0
Bin Size	1.83345e-05
Number of bins	21
# of Sims	Avg Value	% Chg		Std Dev.	% Chg
125	6.76422e-05			3.15143e-05
250	6.84112e-05	0.0113681		3.38827e-05	0.0751507
500	6.88315e-05	0.00614403		3.7638e-05	0.110833
1000	6.74906e-05	-0.0194812		3.54585e-05	-0.0579061
2000	6.81956e-05	0.0104466		3.67136e-05	0.0353946
4000	6.80502e-05	-0.00213194		3.57097e-05	-0.0273436
8000	6.76165e-05	-0.00637312		3.54077e-05	-0.00845525
10000	6.75206e-05	-0.00141929		3.51724e-05	-0.00664784

## Sheet: ADDc Results
ADDc Results
Minimum result	1.56714e-06				7.23904e-06	Study value
Maximum result	4.37387e-05				0.4987	of results are equal or lower
Expected value	8.17396e-06				0.5013	of results are equal or greater
Std Deviation	4.25792e-06
Out of 10000 simulations		Of those with numeric values:
10000 had numeric values.			5% <=	3.43925e-06
0 had error values.			10% <=	4.11947e-06
			15% <=	4.60396e-06
			20% <=	5.01536e-06
			25% <=	5.40685e-06
			30% <=	5.76577e-06
			35% <=	6.11888e-06
			40% <=	6.47833e-06
			45% <=	6.86447e-06
			50% <=	7.25273e-06
			55% <=	7.68208e-06
			60% <=	8.12852e-06
			65% <=	8.62759e-06
			70% <=	9.15692e-06
			75% <=	9.82771e-06
			80% <=	1.06153e-05
			85% <=	1.16288e-05
			90% <=	1.30332e-05
			95% <=	1.57503e-05
			100% <=	4.37387e-05
If ADDc is:				7.23904e-06	0.4987	of results are equal or lower
(Chg to do what ifs)					0.5013	of results are greater
					Cumulative				Cumulative
ADDc	frequency:				frequency:				frequency:
<=1.56714E-06	1	0.0001		<=1.56714E-06	1	0.0001		=>1.56714E-06	10000	1
1.56714E-06 to 3.78669E-06	741	0.0741		<=3.78669E-06	742	0.0742		=>3.78669E-06	9258	0.9258
3.78669E-06 to 6.00625E-06	2585	0.2585		<=6.00625E-06	3327	0.3327		=>6.00625E-06	6673	0.6673
6.00625E-06 to 8.2258E-06	2768	0.2768		<=8.2258E-06	6095	0.6095		=>8.2258E-06	3905	0.3905
8.2258E-06 to 1.04454E-05	1807	0.1807		<=1.04454E-05	7902	0.7902		=>1.04454E-05	2098	0.2098
1.04454E-05 to 1.26649E-05	991	0.0991		<=1.26649E-05	8893	0.8893		=>1.26649E-05	1107	0.1107
1.26649E-05 to 1.48845E-05	491	0.0491		<=1.48845E-05	9384	0.9384		=>1.48845E-05	616	0.0616
1.48845E-05 to 1.7104E-05	244	0.0244		<=1.7104E-05	9628	0.9628		=>1.7104E-05	372	0.0372
1.7104E-05 to 1.93236E-05	122	0.0122		<=1.93236E-05	9750	0.975		=>1.93236E-05	250	0.025
1.93236E-05 to 2.15431E-05	87	0.0087		<=2.15431E-05	9837	0.9837		=>2.15431E-05	163	0.0163
2.15431E-05 to 2.37627E-05	51	0.0051		<=2.37627E-05	9888	0.9888		=>2.37627E-05	112	0.0112
2.37627E-05 to 2.59822E-05	34	0.0034		<=2.59822E-05	9922	0.9922		=>2.59822E-05	78	0.0078
2.59822E-05 to 2.82018E-05	34	0.0034		<=2.82018E-05	9956	0.9956		=>2.82018E-05	44	0.0044
2.82018E-05 to 3.04213E-05	11	0.0011		<=3.04213E-05	9967	0.9967		=>3.04213E-05	33	0.0033
3.04213E-05 to 3.26409E-05	10	0.001		<=3.26409E-05	9977	0.9977		=>3.26409E-05	23	0.0023
3.26409E-05 to 3.48605E-05	5	0.0005		<=3.48605E-05	9982	0.9982		=>3.48605E-05	18	0.0018
3.48605E-05 to 3.708E-05	7	0.0007		<=3.708E-05	9989	0.9989		=>3.708E-05	11	0.0011
3.708E-05 to 3.92996E-05	3	0.0003		<=3.92996E-05	9992	0.9992		=>3.92996E-05	8	0.0008
3.92996E-05 to 4.15191E-05	6	0.0006		<=4.15191E-05	9998	0.9998		=>4.15191E-05	2	0.0002
4.15191E-05 to 4.37387E-05	2	0.0002		<=4.37387E-05	10000	1		=>4.37387E-05	1	0.0001
>4.37387E-05	0	0
Bin Size	2.21955e-06
Number of bins	21
# of Sims	Avg Value	% Chg		Std Dev.	% Chg
125	8.18868e-06			3.81509e-06
250	8.28177e-06	0.0113681		4.10179e-06	0.0751507
500	8.33266e-06	0.00614403		4.55641e-06	0.110833
1000	8.17033e-06	-0.0194812		4.29257e-06	-0.0579061
2000	8.25568e-06	0.0104466		4.4445e-06	0.0353946
4000	8.23808e-06	-0.00213194		4.32297e-06	-0.0273436
8000	8.18558e-06	-0.00637312		4.28642e-06	-0.00845525
10000	8.17396e-06	-0.00141929		4.25792e-06	-0.00664784

## Sheet: CR Results
CR Results
Minimum result	1.04476e-06				4.82603e-06	Study value
Maximum result	2.91591e-05				0.4987	of results are equal or lower
Expected value	5.44931e-06				0.5013	of results are equal or greater
Std Deviation	2.83862e-06
Out of 10000 simulations		Of those with numeric values:
10000 had numeric values.			5% <=	2.29283e-06
0 had error values.			10% <=	2.74632e-06
			15% <=	3.06931e-06
			20% <=	3.34357e-06
			25% <=	3.60456e-06
			30% <=	3.84384e-06
			35% <=	4.07926e-06
			40% <=	4.31888e-06
			45% <=	4.57631e-06
			50% <=	4.83515e-06
			55% <=	5.12139e-06
			60% <=	5.41901e-06
			65% <=	5.75173e-06
			70% <=	6.10461e-06
			75% <=	6.55181e-06
			80% <=	7.07685e-06
			85% <=	7.75256e-06
			90% <=	8.6888e-06
			95% <=	1.05002e-05
			100% <=	2.91591e-05
If CR is:				4.82603e-06	0.4987	of results are equal or lower
(Chg to do what ifs)					0.5013	of results are greater
					Cumulative				Cumulative
CR	frequency:				frequency:				frequency:
<=1.04476E-06	1	0.0001		<=1.04476E-06	1	0.0001		=>1.04476E-06	10000	1
1.04476E-06 to 2.52446E-06	741	0.0741		<=2.52446E-06	742	0.0742		=>2.52446E-06	9258	0.9258
2.52446E-06 to 4.00417E-06	2585	0.2585		<=4.00417E-06	3327	0.3327		=>4.00417E-06	6673	0.6673
4.00417E-06 to 5.48387E-06	2768	0.2768		<=5.48387E-06	6095	0.6095		=>5.48387E-06	3905	0.3905
5.48387E-06 to 6.96357E-06	1807	0.1807		<=6.96357E-06	7902	0.7902		=>6.96357E-06	2098	0.2098
6.96357E-06 to 8.44327E-06	991	0.0991		<=8.44327E-06	8893	0.8893		=>8.44327E-06	1107	0.1107
8.44327E-06 to 9.92298E-06	491	0.0491		<=9.92298E-06	9384	0.9384		=>9.92298E-06	616	0.0616
9.92298E-06 to 1.14027E-05	244	0.0244		<=1.14027E-05	9628	0.9628		=>1.14027E-05	372	0.0372
1.14027E-05 to 1.28824E-05	122	0.0122		<=1.28824E-05	9750	0.975		=>1.28824E-05	250	0.025
1.28824E-05 to 1.43621E-05	87	0.0087		<=1.43621E-05	9837	0.9837		=>1.43621E-05	163	0.0163
1.43621E-05 to 1.58418E-05	51	0.0051		<=1.58418E-05	9888	0.9888		=>1.58418E-05	112	0.0112
1.58418E-05 to 1.73215E-05	34	0.0034		<=1.73215E-05	9922	0.9922		=>1.73215E-05	78	0.0078
1.73215E-05 to 1.88012E-05	34	0.0034		<=1.88012E-05	9956	0.9956		=>1.88012E-05	44	0.0044
1.88012E-05 to 2.02809E-05	11	0.0011		<=2.02809E-05	9967	0.9967		=>2.02809E-05	33	0.0033
2.02809E-05 to 2.17606E-05	10	0.001		<=2.17606E-05	9977	0.9977		=>2.17606E-05	23	0.0023
2.17606E-05 to 2.32403E-05	5	0.0005		<=2.32403E-05	9982	0.9982		=>2.32403E-05	18	0.0018
2.32403E-05 to 2.472E-05	7	0.0007		<=2.472E-05	9989	0.9989		=>2.472E-05	11	0.0011
2.472E-05 to 2.61997E-05	3	0.0003		<=2.61997E-05	9992	0.9992		=>2.61997E-05	8	0.0008
2.61997E-05 to 2.76794E-05	6	0.0006		<=2.76794E-05	9998	0.9998		=>2.76794E-05	2	0.0002
2.76794E-05 to 2.91591E-05	2	0.0002		<=2.91591E-05	10000	1		=>2.91591E-05	1	0.0001
>2.91591E-05	0	0
Bin Size	1.4797e-06
Number of bins	21
# of Sims	Avg Value	% Chg		Std Dev.	% Chg
125	5.45912e-06			2.54339e-06
250	5.52118e-06	0.0113681		2.73453e-06	0.0751507
500	5.5551e-06	0.00614403		3.03761e-06	0.110833
1000	5.44688e-06	-0.0194812		2.86171e-06	-0.0579061
2000	5.50379e-06	0.0104466		2.963e-06	0.0353946
4000	5.49205e-06	-0.00213194		2.88198e-06	-0.0273436
8000	5.45705e-06	-0.00637312		2.85761e-06	-0.00845525
10000	5.44931e-06	-0.00141929		2.83862e-06	-0.00664784

## Sheet: HQ Results
HQ Results
Minimum result	0.0431509				0.199326	Study value
Maximum result	1.20434				0.4987	of results are equal or lower
Expected value	0.225069				0.5013	of results are equal or greater
Std Deviation	0.117241
Out of 10000 simulations		Of those with numeric values:
10000 had numeric values.			5% <=	0.0946991
0 had error values.			10% <=	0.113429
			15% <=	0.126769
			20% <=	0.138097
			25% <=	0.148877
			30% <=	0.158759
			35% <=	0.168482
			40% <=	0.17838
			45% <=	0.189012
			50% <=	0.199703
			55% <=	0.211525
			60% <=	0.223817
			65% <=	0.237559
			70% <=	0.252134
			75% <=	0.270604
			80% <=	0.29229
			85% <=	0.320198
			90% <=	0.358867
			95% <=	0.433682
			100% <=	1.20434
If HQ is:				0.199326	0.4987	of results are equal or lower
(Chg to do what ifs)					0.5013	of results are greater
					Cumulative				Cumulative
HQ	frequency:				frequency:				frequency:
<=0.043150943	1	0.0001		<=0.043150943	1	0.0001		=>0.043150943	10000	1
0.043150943 to 0.104265978	741	0.0741		<=0.104265978	742	0.0742		=>0.104265978	9258	0.9258
0.104265978 to 0.165381012	2585	0.2585		<=0.165381012	3327	0.3327		=>0.165381012	6673	0.6673
0.165381012 to 0.226496047	2768	0.2768		<=0.226496047	6095	0.6095		=>0.226496047	3905	0.3905
0.226496047 to 0.287611081	1807	0.1807		<=0.287611081	7902	0.7902		=>0.287611081	2098	0.2098
0.287611081 to 0.348726116	991	0.0991		<=0.348726116	8893	0.8893		=>0.348726116	1107	0.1107
0.348726116 to 0.40984115	491	0.0491		<=0.40984115	9384	0.9384		=>0.40984115	616	0.0616
0.40984115 to 0.470956185	244	0.0244		<=0.470956185	9628	0.9628		=>0.470956185	372	0.0372
0.470956185 to 0.532071219	122	0.0122		<=0.532071219	9750	0.975		=>0.532071219	250	0.025
0.532071219 to 0.593186254	87	0.0087		<=0.593186254	9837	0.9837		=>0.593186254	163	0.0163
0.593186254 to 0.654301288	51	0.0051		<=0.654301288	9888	0.9888		=>0.654301288	112	0.0112
0.654301288 to 0.715416323	34	0.0034		<=0.715416323	9922	0.9922		=>0.715416323	78	0.0078
0.715416323 to 0.776531357	34	0.0034		<=0.776531357	9956	0.9956		=>0.776531357	44	0.0044
0.776531357 to 0.837646392	11	0.0011		<=0.837646392	9967	0.9967		=>0.837646392	33	0.0033
0.837646392 to 0.898761426	10	0.001		<=0.898761426	9977	0.9977		=>0.898761426	23	0.0023
0.898761426 to 0.959876461	5	0.0005		<=0.959876461	9982	0.9982		=>0.959876461	18	0.0018
0.959876461 to 1.020991495	7	0.0007		<=1.020991495	9989	0.9989		=>1.020991495	11	0.0011
1.020991495 to 1.08210653	3	0.0003		<=1.08210653	9992	0.9992		=>1.08210653	8	0.0008
1.08210653 to 1.143221564	6	0.0006		<=1.143221564	9998	0.9998		=>1.143221564	2	0.0002
1.143221564 to 1.204336599	2	0.0002		<=1.204336599	10000	1		=>1.204336599	1	0.0001
>1.204336599	0	0
Bin Size	0.061115
Number of bins	21
# of Sims	Avg Value	% Chg		Std Dev.	% Chg
125	0.225474			0.105048
250	0.228037	0.0113681		0.112942	0.0751507
500	0.229438	0.00614403		0.12546	0.110833
1000	0.224969	-0.0194812		0.118195	-0.0579061
2000	0.227319	0.0104466		0.122379	0.0353946
4000	0.226834	-0.00213194		0.119032	-0.0273436
8000	0.225388	-0.00637312		0.118026	-0.00845525
10000	0.225069	-0.00141929		0.117241	-0.00664784

## Sheet: Simulation Input Values 1
Sim #	BW	Conc	ED
1	43.0099	14.3596	8.96865
2	35.4123	17.9925	10.26
3	26.3651	16.4352	9.54292
4	27.9246	14	8.25593
5	21.4469	20.9609	8.69693
6	42.7968	13.5797	9.5156
7	25.5939	19.4098	8.68266
8	32.4398	20.0019	9.37994
9	30.5216	11.7242	6.11284
10	27.452	8.75156	9.34945
11	40.0826	11.4265	8.77075
12	33.06	6.93946	8.00283
13	23.1243	23.6628	7.9715
14	30.8725	24.7985	7.35783
15	38.8086	19.1744	10.319
16	42.4551	14.1692	10.6251
17	38.2863	8.65767	9.49876
18	18.6262	14.4497	7.5066
19	34.7404	12.5879	8.10516
20	21.1984	13.7995	9.62997
21	33.0726	10.0866	9.96822
22	38.5956	16.2772	8.9545
23	38.7365	14.287	9.67495
24	33.0452	17.8828	8.67001
25	41.5644	9.59368	8.24296
26	47.3514	14.659	8.06794
27	23.1487	21.5238	7.86298
28	25.1653	22.3281	7.61128
29	35.7346	13.1083	8.81159
30	24.8807	19.424	9.40316
31	41.3635	15.6733	9.90693
32	35.9344	9.23459	9.07766
33	32.7232	15.2515	8.09656
34	29.1819	18.3944	9.4179
35	19.2022	11.4596	8.98252
36	27.5422	17.4228	8.97815
37	29.8802	12.9417	10.1
38	16.3969	8.61377	7.63318
39	25.3186	18.5421	9.56699
40	33.5494	20.8284	8.0795
41	38.7253	23.0807	9.69777
42	26.4716	13.6245	8.68667
43	28.2844	16.8675	8.98125
44	51.7886	11.1909	7.24278
45	37.7673	11.5452	8.79401
46	25.0189	20.5577	8.58057
47	37.5691	21.21	9.23095
48	31.9767	21.5949	10.4413
49	52.0352	14.0842	8.51824
50	23.5047	10.2067	9.84399
51	44.019	17.3395	8.18899
52	31.2781	14.1663	7.96526
53	36.562	23.2714	9.37168
54	21.1486	13.6991	9.4293
55	28.9854	15.1622	8.84544
56	52.3433	7.0979	7.49184
57	60.0153	10.831	9.49156
58	44.8205	14.0693	9.77469
59	23.287	12.0538	8.11131
60	50.5685	23.528	8.6028
61	28.4411	20.232	8.82613
62	24.5106	19.2256	9.99818
63	48.146	11.1274	9.07102
64	31.8601	17.0406	9.23668
65	21.3498	19.0985	8.45051
66	39.5684	12.567	8.56901
67	46.906	11.66	8.59928
68	30.6441	20.3999	8.76642
69	26.3681	23.4197	9.79545
70	27.76	10.4811	8.891
71	40.2025	14.5381	8.48156
72	35.5555	8.76457	8.51754
73	44.5862	13.5855	7.92974
74	30.8474	13.6536	8.00737
75	12.7262	21.4641	8.54868
76	39.2178	18.9356	9.35935
77	41.8203	18.1631	8.1864
78	25.0139	14.9696	9.66366
79	31.1791	19.599	8.32303
80	47.1747	12.7292	9.28093
81	25.9024	23.324	8.39277
82	27.135	8.72364	8.53427
83	38.7278	16.9335	9.34836
84	29.693	17.6484	9.58742
85	37.0953	14.0096	7.99716
86	25.4684	14.8799	8.44058
87	29.706	17.796	10.1427
88	26.9564	10.5308	9.049
89	36.0406	14.1973	7.96663
90	47.0359	13.0733	10.3046
91	31.3246	8.85687	9.74173
92	54.1184	13.3083	6.97444
93	32.1506	15.4949	8.77501
94	35.0078	23.5751	9.4375
95	25.5761	16.237	8.60044
96	30.6002	9.91326	8.22075
97	41.9245	14.5766	9.27635
98	33.6128	18.5564	8.45055
99	44.9109	23.1991	8.17982
100	39.4758	17.6931	9.28829
101	26.9084	15.6061	8.81121
102	44.7506	15.6311	8.55057
103	32.3583	17.3133	8.53646
104	26.8255	17.1527	9.13137
105	44.8628	14.8452	8.69634
106	35.1951	16.0923	8.78835
107	19.452	14.4098	9.35825
108	42.4773	16.1352	8.2419
109	9.489	10.4257	8.79463
110	40.7917	17.995	9.01796
111	39.8111	14.2457	7.78055
112	40.9674	17.691	8.95879
113	33.2183	21.7573	8.54768
114	25.337	18.1454	10.0308
115	28.0478	15.5824	9.49821
116	16.162	23.2784	9.6395
117	65.3341	22.7143	8.33225
118	28.3812	19.8463	8.21297
119	32.8313	21.4211	9.17982
120	25.2251	15.7085	8.81249
121	46.7689	20.9336	9.65284
122	38.0781	25.4859	7.89742
123	43.0219	12.1303	8.6353
124	39.4726	18.8287	8.671
125	44.1033	17.1511	8.9852
126	27.6534	14.8417	8.7055
127	34.4728	17.4424	7.47898
128	41.2266	15.3974	8.5435
129	32.8274	10.6264	8.92972
130	38.3412	11.875	8.16626
131	42.9631	26.565	8.4483
132	44.8888	11.9766	9.68796
133	33.9994	23.1622	7.58816
134	22.2337	16.9554	7.93981
135	27.9683	14.3165	8.13641
136	42.5914	15.1215	9.12958
137	29.7823	16.158	8.94386
138	31.7235	8.28334	9.27937
139	32.2829	18.9511	8.49424
140	25.515	12.2329	9.58883
141	13.3591	16.3732	7.99139
142	36.3961	17.6342	8.33915
143	32.6363	17.5388	8.99235
144	29.7936	20.478	9.10793
145	29.0895	12.9868	9.64044
146	34.4165	13.111	9.88733
147	37.8368	13.7355	9.01545
148	50.62	6.05533	8.21138
149	27.2589	13.8633	9.27614
150	32.8592	16.6822	8.59027
151	51.6071	10.8965	9.33121
152	33.7942	8.10294	9.22762
153	41.1233	19.2149	9.06426
154	49.2911	15.805	8.7905
155	41.2332	10.6969	8.50007
156	44.9092	15.47	9.26866
157	32.2543	11.6181	9.15636
158	40.8161	23.2877	8.34177
159	48.7874	21.8655	10.3474
160	42.0354	20.6468	9.61178
161	13.193	12.65	9.30237
162	33.2631	17.3914	8.02597
163	18.1856	18.5176	8.46643
164	17.9326	18.7747	8.91981
165	35.7209	15.4704	8.34428
166	13.0189	14.4636	8.73997
167	24.7878	21.5959	9.84264
168	41.298	9.14827	8.32955
169	24.1964	11.3861	8.39024
170	32.4067	15.0024	8.04242
171	30.6239	13.7302	8.67421
172	34.37	17.2262	9.29852
173	9.2718	17.4827	9.31546
174	19.3904	11.1707	9.40571
175	46.3866	15.2146	7.36188
176	34.5401	22.1785	9.2509
177	28.5528	19.1325	7.54387
178	54.1306	25.4663	9.35143
179	30.8244	13.231	7.83446
180	29.3851	11.0104	9.25309
181	53.4127	17.216	9.51127
182	29.0565	16.2133	9.50254
183	38.8124	20.0116	7.91736
184	24.5845	16.6064	8.13668
185	17.7865	16.3799	7.15041
186	35.6793	11.2268	9.33551
187	27.009	16.9092	9.62357
188	32.9309	7.42988	9.50739
189	50.6327	14.1133	8.02645
190	27.4737	14.9897	8.65463
191	35.7081	17.0953	9.46594
192	30.8619	18.0529	8.27523
193	24.6776	19.6229	9.70851
194	38.6166	12.3525	9.88656
195	21.6059	14.499	9.4973
196	18.7929	11.8121	9.35673
197	27.4518	13.557	9.5139
198	21.011	19.6082	8.12717
199	25.1325	14.0596	7.61265
200	41.0181	20.693	9.0126
201	13.045	7.74529	8.90893
202	18.7733	12.608	8.96011
203	35.5875	15.0472	8.04842
204	22.5422	13.0485	8.05807
205	38.5521	25.2944	9.8462
206	23.4245	11.4453	10.6332
207	33.1999	23.5219	9.09268
208	31.1226	10.247	9.10978
209	52.0492	16.3546	9.02543
210	34.2988	16.9322	7.43707
211	19.1524	17.5775	9.05385
212	47.2758	10.3291	10.7876
213	36.5165	13.6442	9.94764
214	30.8287	11.454	8.81991
215	49.7328	11.672	9.17258
216	34.8521	15.1715	9.73317
217	51.6977	22.8712	9.652
218	16.7869	15.9819	8.00078
219	39.3717	16.8201	7.69027
220	27.6588	12.4965	8.12041
221	47.9461	14.3612	8.52424
222	47.0204	16.8866	8.49436
223	26.9452	9.97883	9.53982
224	29.3817	15.1755	7.74268
225	34.088	19.9258	9.20638
226	35.4918	18.5898	8.44614
227	53.0713	21.412	9.00485
228	31.0494	24.5681	8.28155
229	39.1303	8.94615	8.61487
230	50.2753	32.5791	8.09865
231	26.324	11.6687	10.4041
232	23.1834	17.5256	10.1971
233	45.7014	11.7663	9.45561
234	17.9434	12.0863	8.47823
235	17.5043	16.9054	9.56236
236	11.9695	16.3576	8.98815
237	41.4073	25.5027	9.4368
238	43.5106	16.8572	7.90778
239	36.8382	7.16287	8.20457
240	42.6153	14.651	8.5006
241	29.8504	14.4087	9.08889
242	42.1736	23.4566	7.77096
243	31.189	12.9413	8.41961
244	41.6447	15.711	9.37943
245	38.3346	14.5379	9.04076
246	35.8644	10.7096	8.90295
247	39.8308	7.8663	9.28244
248	11.5359	19.399	8.76503
249	37.5419	7.09508	9.65671
250	24.6937	20.3979	8.57792
251	18.9792	8.18738	7.29763
252	54.0482	12.6488	9.92014
253	33.0605	17.0188	8.85639
254	40.5385	16.4607	7.57052
255	27.9346	15.4297	8.43567
256	21.2505	15.7244	9.30837
257	18.1887	14.6944	7.42107
258	25.0542	19.8951	10.0487
259	30.2771	17.442	8.48631
260	24.2017	17.4635	7.3969
261	42.4038	13.9309	9.4772
262	46.006	17.2707	9.82575
263	8.98382	22.3944	9.1833
264	28.6836	14.5677	7.84638
265	29.6086	9.42158	7.69691
266	33.6535	13.3309	7.05475
267	22.9059	21.4181	8.42512
268	39.1542	14.908	8.5726
269	24.4481	13.2094	9.93358
270	22.4382	13.8332	9.04974
271	47.0525	19.3135	8.05365
272	27.1755	25.9554	8.93217
273	46.6648	12.6031	9.46073
274	17.278	18.7268	9.22883
275	33.4228	11.0987	8.38642
276	48.88	18.3896	7.77051
277	44.4269	16.6292	10.2276
278	43.973	15.1976	8.57422
279	44.7672	19.4796	11.1644
280	36.7658	20.8762	9.28539
281	29.6944	13.8637	8.74189
282	41.9974	10.2144	9.10869
283	13.2442	21.7721	8.60652
284	14.225	16.0688	9.03692
285	44.2699	13.386	8.04657
286	39.8049	6.48503	8.93281
287	24.1022	15.8989	7.42118
288	30.9326	13.7884	8.42143
289	25.7228	15.676	8.01311
290	42.5376	14.3186	8.625
291	36.9696	11.5086	10.8635
292	31.5159	12.9472	8.3195
293	44.6171	6.25121	8.51548
294	39.6898	19.8659	8.39194
295	21.4501	20.4655	7.73008
296	38.7082	19.6635	8.84591
297	25.7677	8.21429	8.53194
298	20.4225	8.45147	10.1607
299	39.4114	9.82858	8.31909
300	21.1049	12.4548	9.02391
301	34.4872	11.8397	8.91517
302	27.7433	22.5243	9.58685
303	26.7491	15.7465	8.75309
304	48.9149	13.5923	9.25401
305	44.9589	6.88728	8.77684
306	17.9902	17.2249	8.45471
307	46.5385	13.9866	8.94006
308	31.7831	10.2821	7.92879
309	17.9072	19.7851	8.67539
310	11.7157	11.5184	8.32133
311	16.9247	16.1038	8.93359
312	35.5119	9.5607	9.52839
313	44.0439	17.6376	8.43002
314	44.4968	10.973	9.65405
315	31.0483	18.4909	7.88615
316	28.098	15.4682	8.91428
317	39.0414	18.9422	9.32615
318	13.7897	17.6755	9.23854
319	31.3241	19.892	8.26808
320	33.7625	22.609	9.54841
321	39.2077	22.2472	8.81117
322	46.6036	17.3952	10.8938
323	37.9822	16.5129	8.47314
324	49.548	13.3606	8.82062
325	17.4742	14.5038	10.1278
326	34.8698	12.721	7.98909
327	17.6647	16.3341	8.55675
328	35.6588	20.1159	8.44932
329	25.4217	22.6777	7.9401
330	34.3118	17.8331	8.87535
331	37.8207	13.4815	8.66112
332	23.6117	15.0534	9.74646
333	52.7942	7.76005	9.05147
334	28.864	9.26645	9.07862
335	24.504	19.2865	8.54664
336	16.9423	14.594	9.80881
337	55.4005	16.264	7.97285
338	30.9478	20.0288	8.29639
339	35.1259	24.4229	9.63517
340	21.9861	11.0276	8.77372
341	36.5619	14.9627	10.0253
342	26.93	6.60911	7.43351
343	44.6954	20.6495	9.07532
344	25.749	14.6613	9.5959
345	41.7141	20.0544	9.64904
346	57.5997	11.4263	8.56805
347	23.237	17.0101	9.76298
348	36.6964	16.4208	8.49258
349	26.4745	13.5326	8.39356
350	43.1573	12.5006	8.52504
351	31.9233	24.8736	7.94754
352	42.098	12.5642	8.719
353	23.3683	15.9006	8.93845
354	18.4157	20.0342	7.82468
355	32.3457	22.3824	7.31227
356	35.3481	12.0781	8.56473
357	39.3558	20.4554	9.06771
358	32.8188	17.7564	8.43404
359	28.1332	17.3308	9.38369
360	29.5074	15.0913	8.97379
361	14.7421	16.6403	9.58323
362	28.3521	14.6003	7.60104
363	54.648	17.3182	8.83892
364	39.2281	15.9261	9.50075
365	40.0846	11.0067	7.90831
366	29.6265	15.745	9.5314
367	23.3346	12.0162	7.60116
368	16.3058	11.8284	8.23157
369	58.8369	17.8402	8.2637
370	37.3628	16.2429	9.56342
371	32.8939	9.44685	9.75582
372	47.898	13.2873	9.32285
373	37.4121	19.5621	8.83083
374	37.9316	17.9909	8.91975
375	37.8235	13.9564	8.70104
376	52.8378	19.7946	9.74921
377	47.3809	17.7986	9.04746
378	43.6749	14.5934	8.81653
379	28.0566	17.4787	8.77131
380	42.5936	12.6246	8.91639
381	41.3535	13.6158	9.2662
382	20.2554	15.185	8.44791
383	40.2323	16.4994	9.89554
384	35.7625	12.7019	8.26037
385	30.8855	10.8235	9.48417
386	58.0851	10.8989	7.36798
387	55.9653	13.6483	9.49665
388	22.6837	15.3136	8.71705
389	50.1781	18.2076	8.47163
390	35.8655	19.3478	9.08123
391	27.8764	18.0129	8.86702
392	29.81	17.1661	8.66767
393	31.2309	20.3295	10.7449
394	18.2728	15.0982	9.6818
395	38.0277	11.2658	8.32047
396	33.9851	22.8105	10.3588
397	10.726	21.2676	10.6219
398	32.712	22.8073	8.36384
399	37.8493	14.2845	9.3647
400	26.0329	17.6704	9.30819
401	36.6972	12.6939	8.30269
402	29.8236	6.60097	8.71982
403	36.6666	19.5195	8.59048
404	35.1983	7.29492	8.87848
405	30.495	12.5203	7.72228
406	26.731	22.3197	9.12681
407	50.9053	17.0087	8.16215
408	18.9415	12.7608	7.58329
409	49.6833	8.66934	7.42317
410	49.3142	8.88694	9.00956
411	41.7919	22.9096	8.93441
412	39.524	19.5071	8.64768
413	21.5081	7.40476	7.53834
414	14.3905	14.9547	9.318
415	25.2463	20.4443	8.26283
416	50.4389	12.8257	7.7681
417	37.6421	18.1583	8.16425
418	44.0989	10.73	8.21809
419	46.942	14.7186	8.94545
420	35.0258	13.5872	6.77594
421	28.948	23.7838	8.47009
422	55.5113	15.771	8.46602
423	44.4937	22.7658	8.51427
424	49.1628	7.53381	8.93573
425	14.2099	14.6623	7.45667
426	29.3222	17.3222	10.5972
427	29.9587	15.2685	8.08502
428	54.6337	9.20243	8.99297
429	25.681	18.6249	7.82032
430	43.3386	9.42464	9.75667
431	40.1634	23.4761	9.42782
432	35.9786	16.0528	7.95959
433	37.9253	11.487	8.7415
434	31.2933	22.1693	8.2201
435	14.3162	22.4844	9.48374
436	31.4891	9.03005	7.93479
437	36.9421	11.7125	8.69245
438	24.3241	11.771	8.29713
439	20.4515	23.7158	9.27559
440	31.4577	16.5865	9.50459
441	35.7607	21.3367	8.57914
442	10.5696	16.0158	8.95549
443	46.371	11.3923	8.46265
444	39.0053	14.8564	7.68933
445	24.2271	18.039	9.19438
446	36.3845	24.7886	8.80316
447	21.6676	9.55681	8.28649
448	38.7277	22.9432	9.55125
449	40.5776	13.0318	7.73619
450	42.5476	10.0886	9.15718
451	35.5259	17.1561	9.76708
452	36.9918	10.3445	7.49641
453	37.8832	18.3261	10.3627
454	23.2026	14.8289	7.82955
455	49.4117	14.9371	8.91018
456	23.5158	17.4289	8.95101
457	32.1724	22.1685	8.565
458	42.8567	22.3887	8.18467
459	35.438	14.762	9.12974
460	30.6189	10.3371	9.00594
461	42.7773	13.231	9.16626
462	27.4246	24.4128	8.495
463	21.386	16.2205	8.8636
464	43.7604	15.7647	7.94169
465	47.9333	17.9866	7.74519
466	17.6339	14.4518	8.64142
467	36.2103	21.3275	7.88786
468	65.1845	22.3511	9.3409
469	19.5461	16.2348	9.91733
470	47.4961	19.7708	8.66864
471	49.6384	11.2672	7.77921
472	36.2691	19.3173	9.22593
473	29.02	16.0655	7.83156
474	35.9564	17.1564	7.98503
475	17.7941	17.0828	9.40092
476	15.9571	15.3749	8.06333
477	23.7712	10.6822	9.01062
478	46.8574	26.7016	10.3559
479	34.0213	10.6891	8.86602
480	39.8774	16.6149	8.50832
481	46.1175	10.1278	8.42925
482	38.2147	19.3818	10.0607
483	24.5452	21.2518	8.85214
484	24.1598	11.9785	10.0661
485	33.5819	8.16553	8.85285
486	37.143	11.8209	8.24332
487	27.3408	24.5807	9.251
488	38.7771	11.5728	9.15452
489	36.0407	15.2744	9.73013
490	35.4706	12.0483	9.78639
491	43.7163	14.0626	8.32871
492	38.1024	12.1171	8.6703
493	34.7319	18.9188	8.41649
494	25.1384	14.1108	9.56409
495	35.3168	12.4767	7.82247
496	33.2155	15.5587	7.84194
497	42.0323	15.371	9.31429
498	27.3124	14.3055	9.66422
499	23.0712	15.6717	8.80764
500	31.7538	10.5604	9.89996
501	33.4596	22.8457	8.49861
502	28.7366	16.3679	8.0293
503	38.1775	19.8938	9.80639
504	43.9814	19.2772	8.11513
505	45.6301	12.1181	7.6278
506	25.4337	14.631	9.19827
507	33.1778	18.2441	9.78724
508	35.6994	9.91574	8.44861
509	50.0675	13.4002	9.03081
510	43.6829	16.9148	9.87414
511	19.202	18.5157	6.77714
512	34.6433	11.2228	7.40188
513	43.2614	13.7781	8.44548
514	20.2491	13.551	9.34124
515	30.9585	10.3296	9.17159
516	40.8254	16.4511	8.77417
517	25.9526	15.4902	8.43839
518	35.7731	13.5866	8.47753
519	40.1109	20.3168	8.2093
520	43.3129	11.2204	7.51523
521	25.9556	10.8993	7.79095
522	39.22	13.9039	9.6255
523	13.1879	21.7293	9.38701
524	36.6561	7.54987	8.6513
525	50.5163	14.1618	8.17608
526	41.4325	18.1131	9.71063
527	32.6292	21.0271	9.58766
528	23.341	18.5091	9.63823
529	39.3175	15.9217	8.27054
530	49.5023	10.35	9.06061
531	62.4031	18.1643	9.37717
532	48.0437	19.0122	9.47631
533	32.4306	11.9053	7.72806
534	33.6674	21.0144	9.21039
535	33.8731	18.9172	9.08719
536	53.6453	13.7021	9.01091
537	29.5969	14.8587	8.55554
538	33.0885	10.9107	7.14507
539	49.9829	10.3088	8.6195
540	53.2529	13.2986	8.94522
541	36.3171	8.22537	8.30415
542	29.9306	17.0228	10.0807
543	43.4068	10.4447	8.17045
544	45.8877	15.0657	8.45939
545	34.6782	14.6215	8.53972
546	24.7325	13.7442	9.45694
547	57.6352	11.5489	7.12771
548	23.7456	22.9188	8.38581
549	16.7624	13.2039	7.4917
550	47.0443	20.2118	8.64286
551	36.5886	19.5773	8.83626
552	30.1975	9.06319	8.85787
553	24.4179	9.34508	9.60479
554	39.0056	15.5017	7.87879
555	28.9446	21.5321	7.97803
556	34.7336	12.5365	9.34145
557	52.0948	11.2368	8.4039
558	15.7636	9.72854	9.76082
559	45.7828	13.6657	8.77405
560	28.4775	12.0564	9.17328
561	32.284	17.2845	9.36393
562	38.9188	19.2334	9.62888
563	37.8514	18.2489	9.77639
564	18.4265	16.2647	8.81505
565	26.4394	11.9335	9.61191
566	42.5847	9.34623	9.5496
567	45.1825	15.0819	8.58056
568	29.5758	14.5434	9.25256
569	11.1658	14.0101	9.37468
570	38.6232	13.2721	8.49783
571	37.4199	7.58836	9.01942
572	32.5479	15.155	8.22103
573	28.9926	19.4598	7.87488
574	33.5053	10.6016	9.25456
575	36.0764	16.8393	8.58618
576	32.8662	11.5371	8.82552
577	43.1474	9.73598	9.46839
578	28.9925	15.7868	9.05393
579	33.7751	18.3078	8.12741
580	30.0941	13.5207	8.45413
581	32.5911	17.269	8.67566
582	33.6342	18.4042	9.04803
583	29.3586	14.8843	7.55725
584	33.1311	16.9128	8.55488
585	28.5949	19.1683	8.97291
586	14.8139	19.1026	8.03947
587	33.3429	16.5039	9.18729
588	20.3853	19.0784	8.65679
589	27.5161	12.7891	9.24827
590	36.4936	25.0953	9.18424
591	23.8586	13.1638	9.54437
592	34.378	18.8258	8.95901
593	25.5856	22.0478	7.68834
594	30.6683	20.155	8.08911
595	28.9066	20.7267	9.58184
596	15.9941	11.9244	9.54517
597	29.835	16.0882	9.77366
598	35.0658	10.809	9.10433
599	31.5077	18.4999	8.97393
600	35.7981	12.0176	9.66427
601	44.506	9.79842	11.099
602	38.1478	13.753	8.31346
603	42.7774	19.6305	8.82163
604	21.9192	13.0313	7.82292
605	37.1377	10.8717	8.63672
606	34.9419	10.3869	8.44709
607	21.3605	6.64597	9.91281
608	36.2801	22.5582	8.98633
609	33.611	14.2464	8.49178
610	28.5973	19.6351	8.06535
611	17.9399	10.7949	8.62303
612	31.9024	14.6055	9.75079
613	20.4068	17.7449	9.29561
614	52.8722	8.33645	9.13601
615	36.1033	13.0545	9.24324
616	64.3763	21.7291	8.9516
617	29.156	26.1034	9.03218
618	39.0683	16.5833	9.23903
619	27.4363	14.6184	8.68187
620	29.0772	12.1706	8.62476
621	27.0367	17.9138	9.30308
622	28.7327	13.8369	7.99218
623	36.8431	14.2962	8.60139
624	35.9607	21.0452	6.9766
625	32.5101	20.3424	9.74545
626	41.4082	10.5651	8.34963
627	33.9876	16.5087	9.83431
628	32.4321	17.4927	8.29482
629	42.9136	14.7081	7.90358
630	14.0099	12.2429	9.88093
631	32.5923	18.369	8.25343
632	56.8356	14.4404	9.36551
633	41.0073	18.9299	8.36036
634	40.6886	13.8918	9.09136
635	42.2939	8.13962	7.90217
636	33.9199	8.02507	9.90477
637	39.4718	14.0037	9.63724
638	35.4868	19.7759	8.09531
639	24.2332	16.8125	9.57682
640	46.5863	23.503	9.61518
641	39.1751	19.5302	7.5821
642	25.1265	23.7188	8.13095
643	36.1446	21.1445	8.55168
644	57.0122	14.7742	9.56481
645	28.0354	6.80887	10.1342
646	33.7677	19.6227	8.3855
647	18.8586	18.0749	9.17061
648	32.3865	15.6913	9.8835
649	44.6924	19.3885	8.27827
650	38.8901	12.2782	8.53751
651	27.4544	16.484	9.08852
652	14.4503	18.886	9.35187
653	32.1771	19.8662	7.81612
654	56.2373	14.9021	7.92087
655	36.8432	15.6144	9.74833
656	52.2495	18.7476	8.49802
657	44.6241	7.33568	6.59126
658	30.0275	17.6884	10.2949
659	17.4954	18.7324	10.7111
660	43.9761	14.0777	8.94805
661	37.9363	19.9242	9.25442
662	38.9325	9.2474	8.73551
663	27.4896	21.5335	9.89171
664	38.0939	19.1622	8.59733
665	42.7571	13.9855	10.0447
666	26.1173	14.3452	8.40952
667	25.5346	15.1636	9.53689
668	49.7546	18.2562	7.45056
669	24.6859	19.3778	8.6429
670	29.3511	14.6404	10.4758
671	36.1531	19.5769	8.3661
672	48.7177	16.4606	9.39468
673	42.6149	13.5851	9.1623
674	38.6005	19.1838	9.00565
675	30.1217	13.8705	9.21101
676	24.5731	18.9101	9.45505
677	39.0317	15.6775	8.46415
678	55.5239	21.8757	9.43119
679	41.7517	24.0491	8.14709
680	33.8054	13.748	8.60539
681	40.2281	18.7782	8.26451
682	27.0156	10.6579	8.32572
683	38.1352	14.6251	9.20019
684	45.2331	13.7195	8.12385
685	24.3105	12.5972	9.14783
686	43.6202	17.4864	10.1796
687	32.7673	22.0749	7.97134
688	32.0835	17.4553	9.32077
689	38.4252	7.90669	8.72103
690	42.2218	16.9895	8.38959
691	38.6392	16.3135	8.08773
692	24.984	15.0188	9.42156
693	14.6139	11.1622	7.797
694	37.1232	16.509	9.24409
695	24.5346	12.6526	10.2264
696	45.1978	10.0737	9.43903
697	42.0481	15.0722	8.82925
698	26.8848	17.8651	10.6
699	27.6549	25.5527	8.95229
700	32.9278	18.7538	8.00932
701	39.1067	17.1625	10.2495
702	36.498	12.3936	8.69535
703	31.4194	26.5282	8.02477
704	40.0065	20.5073	7.61764
705	10.1902	11.2551	8.8676
706	24.124	15.1194	8.93059
707	32.9124	13.1769	8.95648
708	21.8916	11.9281	9.65164
709	40.2233	14.2627	9.1028
710	27.5276	16.1124	9.96598
711	23.3725	14.7395	8.26402
712	43.0804	8.95956	8.78514
713	11.1159	19.5512	8.13914
714	13.5712	25.4712	8.43773
715	41.2351	14.1923	7.4685
716	21.3641	16.7704	7.93782
717	24.185	19.2345	8.84252
718	56.0764	9.37557	9.89948
719	45.7457	21.0869	9.33221
720	12.3379	15.8009	8.42374
721	37.1053	13.947	10.309
722	42.7022	19.1648	8.16488
723	41.4225	20.8005	8.87381
724	25.8236	7.33893	7.70096
725	19.1999	13.7856	8.90443
726	26.3757	17.6171	8.80486
727	39.7901	11.9012	9.20624
728	50.9186	6.89394	8.80823
729	29.5438	18.2573	9.2985
730	33.1492	13.4251	8.46476
731	38.9502	17.8309	9.51132
732	37.7617	15.0642	8.61761
733	46.443	11.9204	9.45553
734	31.7457	19.4635	9.05219
735	26.5955	12.5697	10.837
736	26.139	6.3631	8.46967
737	51.936	11.2065	7.95782
738	36.9778	15.7059	8.68173
739	42.9702	15.5901	8.60878
740	31.8223	10.2685	9.4402
741	51.3861	17.6051	9.85706
742	20.0718	11.5279	9.18833
743	46.8473	14.309	7.50676
744	26.932	26.3914	9.44345
745	46.027	20.9123	7.94981
746	41.0936	12.232	8.63096
747	53.37	12.5025	9.81718
748	17.0979	10.579	8.79908
749	22.8528	17.383	9.01445
750	38.0738	12.3604	10.1108
751	27.8618	11.2121	8.79388
752	24.9281	18.6027	8.64566
753	35.0683	22.46	9.4714
754	41.6181	9.86999	9.09622
755	41.5294	21.6399	9.87151
756	39.6459	13.5332	8.25855
757	22.3992	17.8934	8.95955
758	18.7214	6.33557	10.6039
759	23.6432	6.32147	8.24608
760	36.7699	22.3743	8.22414
761	34.7826	12.4703	8.8541
762	23.5206	18.468	9.119
763	34.518	18.0808	9.26501
764	23.8862	18.1171	7.88406
765	49.6564	17.0135	8.83465
766	37.0458	22.227	8.37846
767	43.5389	10.406	8.55533
768	28.2141	24.8957	7.99833
769	16.9538	12.896	7.83589
770	51.0364	14.8953	7.29027
771	33.6549	9.80555	7.96692
772	39.2662	15.8873	8.00872
773	46.6405	9.71514	8.93768
774	33.507	17.966	8.41371
775	27.2777	18.0577	8.27537
776	30.6431	10.7467	9.83261
777	31.7231	17.1061	8.24671
778	34.079	14.2379	9.31269
779	22.6666	10.3728	8.89479
780	33.8862	14.9487	9.50575
781	13.7417	16.1806	10.1469
782	34.6644	13.8636	8.79739
783	40.2252	19.2743	8.24513
784	24.493	21.0978	9.13469
785	41.171	14.712	7.49878
786	53.4544	19.6288	9.0004
787	39.5629	17.9914	9.2036
788	48.6475	9.36864	9.39527
789	60.6992	17.5675	7.9848
790	53.07	18.4762	9.51891
791	41.3537	8.53199	9.41952
792	45.2749	14.0044	8.63977
793	33.5313	19.3748	9.08141
794	34.5977	16.1075	9.02428
795	34.5237	10.5199	8.07093
796	40.4036	15.9462	8.40246
797	32.0925	21.5549	8.20519
798	47.0378	6.24244	8.38943
799	50.5349	13.7181	10.2676
800	40.4479	22.8636	8.90401
801	50.0061	14.4179	8.9302
802	17.8088	15.4043	8.97441
803	40.5878	17.1282	9.51284
804	41.8815	19.5004	9.36058
805	37.3815	25.395	8.84901
806	43.3372	11.8939	8.55023
807	27.4271	9.38992	9.76461
808	54.1471	17.9202	8.58623
809	38.9548	21.4191	8.43315
810	36.638	9.86985	8.97839
811	37.1468	19.2132	8.64055
812	30.4649	14.2901	8.33637
813	47.8571	14.3856	7.84626
814	20.6277	17.1223	8.9433
815	41.2917	21.5382	8.32199
816	57.2573	21.0911	8.99296
817	23.7677	15.3652	9.50862
818	41.7286	24.0026	8.71644
819	24.3731	9.18513	10.1079
820	48.8199	18.2352	10.2176
821	23.3407	21.2394	8.1641
822	36.2669	14.9392	9.91071
823	41.9891	6.92919	9.50629
824	51.802	15.4975	9.35673
825	24.4057	13.7166	7.20077
826	29.5891	11.7919	8.34466
827	38.5155	14.3319	8.53792
828	26.1451	17.7736	9.27461
829	31.9183	26.3545	9.30198
830	47.9012	10.4759	8.7962
831	39.9392	20.2983	10.0452
832	28.2607	17.859	9.63361
833	28.7622	11.6664	8.2999
834	42.5417	6.58966	9.78322
835	51.3245	15.3892	9.44907
836	26.4192	10.3032	8.8436
837	26.6331	15.3509	9.73852
838	20.502	19.5188	8.62499
839	30.5284	8.89132	8.33994
840	29.8834	18.6048	8.79085
841	42.0378	19.7267	9.09908
842	25.454	15.4351	8.02958
843	34.0471	13.5511	8.51044
844	29.1163	22.7027	8.41499
845	48.1473	15.4818	8.12531
846	40.28	15.0419	9.02485
847	42.8955	11.691	8.39506
848	36.2255	17.519	8.69253
849	28.7238	15.5564	7.99241
850	38.5506	21.8055	7.80171
851	34.31	13.1741	9.92051
852	35.5516	18.9314	9.38397
853	18.7551	16.6657	8.70247
854	40.7655	15.8105	8.96062
855	47.4752	14.5791	9.04433
856	22.7591	18.7682	8.30547
857	19.7643	30.2178	9.02468
858	43.1802	13.726	9.42423
859	51.5719	21.4789	10.0552
860	34.092	14.3413	6.43202
861	36.6298	23.2277	7.9686
862	45.3105	9.9888	8.78749
863	37.1386	14.2352	9.3514
864	16.6656	16.2279	9.54661
865	47.0625	15.5459	7.61911
866	22.7642	17.9488	10.3246
867	21.1198	17.3922	8.53642
868	44.2632	13.8705	9.6274
869	28.0911	15.9302	9.67511
870	39.4424	20.2782	10.24
871	35.4281	20.4007	10.4266
872	58.0809	15.3768	8.68842
873	33.0647	9.90877	9.0268
874	44.2998	11.2197	8.96745
875	41.7509	21.4195	9.01122
876	37.4022	19.951	8.45163
877	42.9081	25.3094	8.15354
878	25.407	14.0237	9.06904
879	32.0951	10.7509	9.51194
880	44.5126	13.783	7.86044
881	23.2344	14.55	7.52699
882	40.0808	12.0868	8.78543
883	28.4302	11.308	10.1914
884	22.0204	21.4292	10.1931
885	23.7734	24.6894	8.22127
886	43.7225	15.6554	9.05632
887	38.2454	16.4641	8.20135
888	45.2903	12.3073	8.41359
889	50.135	12.7893	8.70846
890	35.4595	18.5553	8.36413
891	30.8731	8.7978	8.54437
892	26.376	12.3564	8.73458
893	39.1733	7.46373	9.3957
894	30.1557	16.6724	9.0556
895	30.1286	19.5972	9.76744
896	19.3791	8.36453	9.19545
897	38.214	20.2254	10.2813
898	39.1711	17.6582	7.35872
899	55.4221	13.1385	8.35066
900	26.5346	15.9383	8.10715
901	27.3038	16.2596	9.62908
902	39.7536	13.7672	8.98051
903	29.1456	20.4485	8.66255
904	16.2619	10.0345	8.22973
905	34.2831	15.1529	7.29867
906	29.6673	18.8182	7.34338
907	39.9789	14.2163	9.03541
908	47.6661	7.83538	9.42624
909	31.6271	16.917	9.26269
910	34.505	11.1172	9.44203
911	24.2435	13.3534	8.77023
912	20.2914	19.0897	8.28164
913	48.0906	15.0933	7.74221
914	35.8796	14.9135	8.70571
915	36.383	20.7226	8.3628
916	16.8302	17.2157	8.32449
917	42.9861	17.6604	8.74912
918	14.7973	21.6552	8.15591
919	38.0269	16.0631	8.77942
920	34.4012	18.7968	8.0108
921	22.7324	13.2621	8.21096
922	37.6877	13.9993	9.54325
923	31.8337	19.7156	8.94376
924	27.0453	12.3758	8.35828
925	42.6277	9.67925	8.82485
926	33.3916	14.269	9.53197
927	23.3397	7.90524	10.0421
928	36.19	19.948	7.7123
929	21.1354	16.4095	8.99662
930	46.5237	17.4427	8.55618
931	27.9509	19.0588	8.14489
932	29.9128	19.5598	10.3123
933	37.584	9.59619	9.01133
934	45.7375	14.7866	9.033
935	36.4305	15.5414	9.96141
936	21.0655	12.0731	8.61408
937	23.395	21.1849	9.33906
938	34.7299	18.7495	8.56104
939	47.8762	17.1435	7.90387
940	36.2419	16.8189	9.10387
941	49.5633	19.7543	8.04405
942	35.2351	20.1675	8.69005
943	33.0816	13.7798	8.671
944	16.4675	18.6424	8.47528
945	29.4139	24.2506	8.20762
946	36.2618	20.5493	9.28907
947	25.7591	19.8081	8.8093
948	18.8006	17.5822	8.40789
949	65.8971	9.19701	8.65105
950	21.2081	16.2353	8.78877
951	25.7973	19.8165	8.27049
952	31.1968	20.5003	7.22732
953	38.9967	11.7465	8.41566
954	33.8195	9.70693	9.00343
955	31.3484	15.3792	8.66773
956	19.6543	18.8808	7.86386
957	42.1784	16.9776	9.15934
958	24.7718	11.8221	8.57376
959	35.5319	13.8532	8.98312
960	9.89108	15.8015	7.76941
961	45.8108	7.51082	7.98133
962	31.8967	15.4256	8.64333
963	35.9008	18.0247	7.91102
964	32.3765	22.2516	8.76918
965	35.8408	27.3567	9.32461
966	45.9794	8.54484	9.38956
967	49.1894	8.65184	8.99602
968	16.4305	18.0739	7.7367
969	39.8066	15.9148	7.8416
970	41.0174	14.725	8.72142
971	30.3568	6.95619	8.70797
972	13.8267	23.5499	8.83106
973	36.2919	9.80321	8.7436
974	21.8785	16.0596	10.1098
975	12.5459	13.129	9.32932
976	34.722	21.9667	7.10365
977	38.8265	19.2137	8.49382
978	34.064	11.9628	8.48991
979	33.2951	23.6338	8.65026
980	29.14	22.1791	8.82397
981	31.5586	17.5032	8.02237
982	33.8868	17.923	8.31866
983	30.179	9.12148	8.73006
984	42.0578	17.559	9.62079
985	30.166	15.7003	8.31123
986	63.0473	16.049	8.80587
987	17.8783	14.9791	9.15046
988	48.3081	17.442	8.75798
989	35.0467	18.2625	8.06636
990	30.8827	18.2516	8.96321
991	39.723	17.431	8.77481
992	50.569	24.628	7.43199
993	13.2	15.2877	7.31214
994	23.7412	24.9331	9.21867
995	29.6102	14.3192	7.03135
996	46.9041	12.5267	9.02789
997	44.8361	10.9418	8.5734
998	39.6409	15.0209	9.88549
999	35.1783	24.1391	8.80865
1000	34.0106	21.2237	9.81827
1001	14.5304	7.02442	7.82806
1002	25.92	15.626	8.92399
1003	12.9792	10.8317	9.61206
1004	33.2065	16.416	9.56626
1005	18.1727	11.224	9.15206
1006	26.9965	20.5889	9.64187
1007	39.2067	11.1415	8.94891
1008	43.0265	24.0839	8.45186
1009	31.6135	16.9104	9.14519
1010	15.3836	23.991	10.2747
1011	44.5743	7.16862	9.39424
1012	33.2721	18.6106	8.37091
1013	31.1387	19.4138	8.74268
1014	30.5588	16.4501	7.57916
1015	38.7077	9.52397	9.11189
1016	32.5918	19.1691	7.29462
1017	29.2084	12.2074	8.23708
1018	39.3848	17.024	9.23481
1019	11.4078	19.5328	10.5526
1020	41.5401	17.5727	9.28101
1021	46.1344	14.447	8.05035
1022	28.017	13.7282	9.2287
1023	28.5813	19.496	7.79953
1024	51.4408	14.7066	8.35584
1025	36.417	24.0021	10.4137
1026	53.8582	16.8648	9.57532
1027	44.7767	11.4515	9.5662
1028	41.6297	15.5619	8.26342
1029	48.5735	11.1689	9.18022
1030	39.9974	16.321	8.02253
1031	24.711	8.19354	7.8932
1032	17.5106	26.9959	8.28512
1033	21.7113	15.5039	8.75448
1034	45.2624	15.1128	8.38504
1035	18.0878	13.6314	8.47221
1036	9.37469	11.0421	8.80865
1037	45.4517	16.9062	6.82799
1038	27.4861	19.0803	8.2986
1039	23.7435	19.4501	8.51132
1040	32.4354	10.1392	8.94994
1041	35.0803	16.1393	9.94694
1042	15.0904	16.6358	8.33634
1043	34.2712	14.2194	8.94428
1044	37.024	20.2676	8.7309
1045	31.6613	9.29306	8.96211
1046	20.4176	11.0971	10.2136
1047	45.5382	18.0849	8.42259
1048	15.2234	14.7539	9.60388
1049	35.279	15.0786	9.88849
1050	32.118	19.7334	9.57388
1051	33.0417	21.5055	8.52333
1052	41.2114	15.7549	9.29248
1053	25.3238	12.5769	9.69389
1054	26.7697	7.58294	9.62767
1055	20.7135	17.2018	9.72942
1056	37.6308	9.06717	7.98248
1057	34.4489	16.9322	9.28762
1058	37.6006	20.1912	8.67308
1059	26.9396	14.7134	8.96419
1060	23.6332	14.2437	8.12265
1061	26.3043	17.0567	9.81745
1062	26.1897	14.0729	8.88503
1063	36.5773	11.0333	9.80063
1064	29.1156	12.2758	8.64246
1065	53.4458	22.3977	8.6984
1066	41.5168	12.0522	9.29445
1067	49.8148	19.6159	9.28564
1068	32.2583	13.3467	8.61927
1069	12.3928	17.7005	8.87032
1070	26.4728	11.6038	8.23382
1071	15.0852	16.0189	7.75825
1072	36.0513	10.3571	7.30085
1073	38.9877	20.3019	8.52159
1074	35.2043	19.1443	9.30241
1075	29.5979	18.5774	9.54547
1076	51.6382	20.9751	10.006
1077	20.5586	18.1459	7.40178
1078	31.851	9.83872	9.0978
1079	41.7575	20.5622	7.99479
1080	43.7324	17.9207	10.4713
1081	27.3842	9.19195	7.72932
1082	36.3609	15.4202	9.10192
1083	18.3675	18.1174	10.2574
1084	48.8664	13.5357	7.6791
1085	46.4272	16.2108	9.05676
1086	42.4147	10.358	9.51281
1087	29.4748	16.7712	8.06379
1088	54.1342	19.2369	8.838
1089	60.181	6.99567	8.03657
1090	13.8074	20.1931	8.73777
1091	24.0027	12.0927	9.06841
1092	27.8871	13.4548	7.95304
1093	26.7911	17.1922	9.56031
1094	24.1079	15.1057	7.98166
1095	29.6225	21.4129	9.53391
1096	41.4822	15.5195	9.13716
1097	24.9774	19.9857	9.6821
1098	53.3896	12.2118	8.37213
1099	27.7122	18.4156	8.01751
1100	21.7291	11.0891	6.68258
1101	48.4375	13.7739	8.32923
1102	43.0485	15.8404	9.30286
1103	37.3189	12.9107	8.97345
1104	28.8843	19.7057	7.90153
1105	21.453	19.3599	8.46599
1106	21.5303	18.3355	8.39109
1107	27.3124	12.1959	9.37081
1108	31.0422	14.8491	8.78278
1109	18.801	15.3936	8.51586
1110	35.1658	18.7131	7.91224
1111	43.3973	13.4749	8.11262
1112	47.3119	16.8161	9.44056
1113	31.3267	14.919	8.66098
1114	25.6636	18.8684	9.17612
1115	15.3952	15.8301	8.99127
1116	29.4369	20.7905	9.61773
1117	30.9296	18.4394	8.89785
1118	36.6106	10.9254	9.3033
1119	50.2059	14.8435	9.70687
1120	20.9063	13.8775	9.3156
1121	33.1794	27.1854	10.7632
1122	27.1573	19.2968	9.06002
1123	37.6562	26.2934	10.0874
1124	31.8158	16.729	8.33005
1125	53.2604	12.2945	9.97527
1126	24.5219	15.5343	9.49189
1127	49.0422	13.8839	11.3521
1128	37.6222	17.9047	8.93757
1129	11.4556	21.027	8.36995
1130	20.1459	19.0297	9.25621
1131	40.4475	9.77734	10.2765
1132	43.457	17.0819	7.99755
1133	49.0952	9.17952	9.34828
1134	23.0964	19.6035	9.28539
1135	18.1001	17.281	8.50104
1136	34.2252	21.3736	9.91093
1137	33.7572	12.2963	8.55511
1138	48.199	17.8805	8.86662
1139	21.8386	21.3125	7.37591
1140	45.5375	14.0359	9.39364
1141	49.0304	19.6638	9.66993
1142	30.9754	21.4293	8.99565
1143	36.8924	11.6735	9.24002
1144	42.5072	14.1795	7.85618
1145	37.4838	14.2758	9.34482
1146	38.6317	7.54153	7.6166
1147	28.9182	15.4504	8.33284
1148	37.6526	10.0227	9.42969
1149	37.3542	22.367	8.3867
1150	30.3916	19.9382	9.2073
1151	20.6233	18.3991	8.76328
1152	50.0634	11.6093	8.66187
1153	48.3702	14.107	9.60486
1154	40.5331	13.5725	8.37043
1155	47.824	16.4842	7.74729
1156	31.5891	16.169	9.04422
1157	25.6821	14.2482	9.0852
1158	38.3147	14.7963	7.59923
1159	17.7755	13.1353	10.1605
1160	30.5833	15.9628	9.43531
1161	18.5049	14.8244	8.67977
1162	26.1823	16.6059	9.01905
1163	19.3533	22.6407	9.12394
1164	23.7731	12.6337	7.3073
1165	49.5267	9.06476	9.27825
1166	30.3842	19.4659	9.6467
1167	29.7877	18.9424	7.66922
1168	13.9074	12.28	8.2548
1169	38.6695	15.7241	8.04227
1170	39.43	20.4657	8.66373
1171	27.8506	22.1671	8.71061
1172	19.4434	11.8483	9.01019
1173	31.7403	14.0294	10.4392
1174	41.0095	19.5088	7.57104
1175	40.6936	13.8622	9.11778
1176	40.3198	12.8602	8.38929
1177	32.7498	18.7211	7.7978
1178	31.0654	17.9286	8.89269
1179	34.3981	23.9953	9.08254
1180	15.248	12.5372	8.37298
1181	32.7823	16.3047	10.2715
1182	35.1966	16.3659	9.24792
1183	29.9211	9.20574	8.01142
1184	41.0388	12.7994	9.04113
1185	24.1078	17.6865	9.31845
1186	50.9648	8.99529	9.24389
1187	20.5907	17.2928	9.4506
1188	27.488	14.7518	9.81055
1189	38.4641	25.3715	9.18438
1190	27.5188	13.4039	9.97636
1191	29.4895	24.8162	8.73094
1192	20.4224	13.5381	9.44693
1193	54.0544	21.1921	8.36973
1194	29.7837	13.6459	9.83176
1195	18.9717	15.8823	8.31947
1196	22.1999	17.7083	7.99335
1197	34.7204	11.988	10.3722
1198	50.5817	12.4351	10.3806
1199	25.6897	19.3873	7.85635
1200	30.1077	15.2047	8.0456
1201	19.5629	14.9076	8.43857
1202	39.9856	14.5949	9.28459
1203	52.6462	14.7125	8.89678
1204	44.1784	15.4178	9.11036
1205	38.9842	11.5046	8.4752
1206	38.046	14.2615	8.23509
1207	15.4466	12.7015	8.70729
1208	37.1666	14.2486	9.66573
1209	10.443	23.044	8.78089
1210	36.477	8.21992	8.71749
1211	31.4226	18.8469	9.78602
1212	21.0915	24.1078	8.98197
1213	25.0573	9.35065	9.08885
1214	22.0455	9.23552	7.90865
1215	48.2667	16.2684	8.70239
1216	33.2864	18.5772	8.76654
1217	38.9664	8.10105	8.60363
1218	40.5702	16.4908	8.98363
1219	29.7166	13.8472	8.62477
1220	29.2611	18.0863	9.2407
1221	28.2854	20.8234	8.93813
1222	11.2851	10.7512	9.65496
1223	37.5144	19.938	8.64205
1224	45.6918	20.8076	9.77594
1225	17.7674	15.4313	8.59999
1226	32.5596	14.1802	9.75879
1227	31.6347	19.4433	8.25877
1228	51.3917	18.3358	9.37301
1229	49.5283	12.9972	9.14568
1230	28.3861	14.9455	8.91805
1231	37.8148	13.2934	10.0053
1232	44.4433	18.0318	9.13005
1233	34.7098	14.031	8.73257
1234	37.056	13.0281	8.79378
1235	24.3256	13.7613	8.84255
1236	44.651	13.2472	9.35579
1237	26.7907	19.8887	9.73107
1238	37.1958	9.74535	8.45336
1239	38.4929	19.8928	7.95273
1240	35.9725	9.98329	7.25339
1241	25.3348	15.8361	9.56668
1242	31.1194	16.5979	7.89544
1243	26.8303	19.9062	8.81298
1244	18.8548	15.1158	7.88222
1245	28.4774	22.1585	8.48264
1246	36.6911	18.8026	7.33704
1247	55.4053	8.52212	8.67367
1248	23.3973	13.9754	9.15318
1249	34.8318	12.344	8.13041
1250	31.372	25.5058	8.00133
1251	37.1338	16.3851	7.34433
1252	38.9971	19.7486	8.86496
1253	41.2522	24.1851	9.45149
1254	27.7142	16.3942	8.68045
1255	52.1199	15.7939	7.77297
1256	35.2509	20.0425	8.51346
1257	32.3769	11.4475	6.93433
1258	47.5007	20.0966	7.94992
1259	20.1751	8.81328	7.97216
1260	15.4753	11.4803	8.89256
1261	46.1133	17.1384	8.35775
1262	11.1006	15.2579	10.0428
1263	24.8638	19.2392	9.14453
1264	20.1296	18.4941	8.71193
1265	25.3286	10.6571	9.48751
1266	49.8868	20.6187	8.05021
1267	24.2694	19.337	8.85163
1268	39.6915	12.5729	9.22726
1269	40.5327	15.0757	7.78376
1270	25.5956	14.3387	7.59837
1271	42.9525	19.7193	9.16837
1272	27.2335	10.3149	7.87697
1273	26.8784	14.6933	8.26096
1274	31.2171	18.8812	10.0743
1275	42.747	15.4633	8.71612
1276	30.4662	13.7663	8.97116
1277	23.6698	14.5354	9.54624
1278	37.8707	17.1985	8.47581
1279	32.7453	21.2386	9.33985
1280	37.6411	18.7962	8.89999
1281	31.9079	24.4332	9.82495
1282	45.1225	15.294	8.22358
1283	29.3039	13.8954	9.48228
1284	46.8032	16.0136	8.6574
1285	51.406	19.302	7.95313
1286	52.5873	17.373	9.91815
1287	24.6421	15.6212	9.92266
1288	36.599	21.8646	8.68128
1289	25.1062	19.7931	8.39201
1290	33.2457	19.805	10.0597
1291	27.5971	16.1366	9.11875
1292	36.4009	11.3529	9.14557
1293	22.8419	18.3956	7.74086
1294	28.1087	15.8233	7.90482
1295	42.5658	20.167	7.93998
1296	47.9699	21.1432	8.58961
1297	26.1952	16.357	7.52136
1298	40.3941	6.62541	7.09594
1299	36.3511	17.6251	9.11784
1300	55.7004	14.1862	8.82489
1301	44.3531	17.7191	9.51645
1302	41.9467	15.2389	9.19868
1303	26.5503	13.2617	9.09111
1304	20.0211	15.4126	8.77544
1305	42.8162	21.2224	9.08705
1306	40.1456	11.6462	8.94536
1307	26.0179	13.0389	9.06867
1308	17.8946	15.8368	8.3897
1309	30.1913	22.0397	7.29183
1310	48.4386	14.0186	8.96057
1311	31.0625	26.5737	9.20106
1312	19.7912	15.9168	9.31721
1313	27.3714	8.24885	9.44735
1314	42.6621	19.9095	9.0474
1315	40.2862	14.5598	7.52261
1316	41.0938	9.08523	7.72391
1317	17.3149	13.646	8.22296
1318	25.1711	12.2607	8.4154
1319	24.7656	20.8193	9.0307
1320	29.8323	17.6286	9.32866
1321	30.8486	24.8368	8.45846
1322	33.7722	16.2242	6.84388
1323	33.5697	15.1066	8.75669
1324	22.715	17.0262	8.92381
1325	51.643	17.1671	9.14705
1326	25.4992	18.9282	10.0467
1327	38.3762	17.7738	8.4924
1328	39.1356	14.5211	9.52036
1329	11.3572	15.8558	8.70335
1330	29.9535	18.8419	8.80061
1331	25.3356	12.0062	9.61364
1332	33.6271	16.7561	8.05454
1333	16.7285	9.04234	8.84398
1334	39.0502	21.8385	8.69339
1335	50.3089	11.6409	8.46141
1336	38.928	9.1977	8.51331
1337	29.7347	14.0228	9.65876
1338	39.4616	14.2571	8.28795
1339	36.8743	17.1305	8.53818
1340	26.9816	24.3617	8.74003
1341	30.5761	21.3391	8.12516
1342	43.9701	16.7462	8.94889
1343	32.5763	13.8023	8.18915
1344	33.6011	18.6754	8.84793
1345	42.919	17.3956	9.14408
1346	43.6557	25.3669	7.7557
1347	39.0822	10.5194	8.09991
1348	29.7785	16.7452	8.61025
1349	38.068	14.4687	8.26953
1350	31.9495	23.1534	8.76268
1351	30.5064	11.357	8.59982
1352	31.5721	6.93683	10.7716
1353	47.6106	12.2831	9.41828
1354	29.8823	10.4876	9.41242
1355	36.7954	18.4321	9.37919
1356	45.0046	18.3887	9.21794
1357	20.1387	13.9642	9.7255
1358	30.5066	20.6028	10.09
1359	41.5347	7.75374	8.39833
1360	39.7986	17.7062	7.09889
1361	32.9286	11.0851	8.95701
1362	43.1021	21.9798	8.996
1363	23.8583	15.7698	8.6338
1364	34.4268	15.632	8.77104
1365	33.4107	15.517	7.92589
1366	33.6867	7.8453	7.35519
1367	21.7174	20.1589	7.64087
1368	19.2529	20.6985	7.83626
1369	24.2182	12.6015	9.97269
1370	32.3911	17.8121	8.53922
1371	22.2972	16.3101	8.5806
1372	32.4608	16.9141	8.0168
1373	51.5684	7.71871	8.08159
1374	42.0438	15.1895	8.83393
1375	54.4219	27.0912	7.95532
1376	43.525	15.0204	9.05607
1377	27.4198	15.1718	8.62126
1378	29.3644	18.0266	9.23178
1379	30.2335	15.8323	7.8426
1380	62.1857	13.9025	8.40928
1381	46.0751	17.5827	9.05334
1382	47.1515	10.6546	9.89243
1383	47.4171	11.9381	7.17085
1384	10.3581	18.2585	9.14354
1385	19.1625	18.0988	7.97212
1386	25.9558	12.2723	10.248
1387	34.1481	19.6548	8.97681
1388	51.5521	18.8974	9.3711
1389	44.0231	10.6884	9.1643
1390	42.8684	18.025	9.71242
1391	35.9303	24.4535	9.41556
1392	12.216	12.0325	7.87304
1393	33.4812	21.3701	9.88102
1394	27.5289	13.5121	8.83853
1395	54.0016	18.5175	8.69454
1396	25.8121	21.3642	8.51805
1397	30.3818	9.35308	9.25309
1398	57.4438	14.2616	8.8641
1399	27.261	23.3592	9.44395
1400	35.5474	16.4877	7.50229
1401	44.0904	21.0485	9.10799
1402	54.6768	19.9782	9.24573
1403	45.8501	15.0345	8.37338
1404	56.5096	15.7567	8.64694
1405	49.9554	17.8267	9.0964
1406	34.4589	13.4557	8.93818
1407	21.3485	25.686	8.69854
1408	52.0611	28.3375	8.85033
1409	39.0108	23.2828	7.25186
1410	37.3451	9.24231	9.48256
1411	34.3793	10.6559	9.27869
1412	35.362	15.3258	10.088
1413	33.6114	21.3306	9.52299
1414	16.6919	24.0597	8.53474
1415	16.6242	19.4395	9.17368
1416	38.323	7.5813	8.61474
1417	35.0207	14.4334	7.8073
1418	39.3316	16.2079	9.74535
1419	28.2465	11.8994	9.31547
1420	29.1642	10.9399	8.56952
1421	31.106	11.8133	8.38965
1422	13.8544	15.6107	9.69009
1423	36.8618	12.7556	8.66231
1424	34.8846	17.3038	8.52048
1425	46.6362	13.409	7.7374
1426	12.7094	11.2685	9.14344
1427	36.0956	8.86905	8.98843
1428	12.1982	22.4885	10.7043
1429	21.7186	17.81	8.42772
1430	19.432	15.3817	10.0687
1431	44.6757	18.1954	8.08843
1432	34.3953	15.8324	9.33642
1433	15.3234	10.3761	8.20522
1434	32.1557	14.7761	10.3408
1435	29.2431	21.8809	8.0565
1436	40.1219	17.0381	9.47021
1437	33.5286	22.2912	8.99069
1438	29.8943	18.2528	9.50868
1439	31.6396	16.6264	7.92231
1440	37.6536	11.8247	9.4372
1441	18.6179	12.2103	8.17373
1442	42.0817	16.1169	9.73422
1443	29.0197	12.8097	8.9841
1444	31.6569	17.6823	8.5201
1445	33.3241	8.91213	10.4092
1446	22.3584	10.7406	7.93602
1447	60.9012	21.721	9.28693
1448	56.7579	18.9091	9.36068
1449	48.1878	15.6758	8.4692
1450	53.414	24.3255	8.95094
1451	36.3937	15.3837	8.50931
1452	37.7035	8.34133	7.54235
1453	42.8782	9.23596	8.89146
1454	31.4219	15.5192	9.51483
1455	17.507	19.6555	8.96347
1456	58.7407	16.5106	8.83921
1457	15.3336	10.5915	9.2298
1458	38.1449	12.895	9.2337
1459	32.2116	13.7519	9.40009
1460	40.6997	23.6679	8.24189
1461	42.3676	18.6963	9.17243
1462	23.0444	20.0796	9.09588
1463	23.7546	14.2701	8.34215
1464	29.206	14.8548	9.62088
1465	30.5076	17.0584	9.70829
1466	44.6286	18.3696	10.2576
1467	50.416	17.2857	9.13968
1468	29.4593	15.6834	7.85461
1469	13.6379	13.0841	9.38432
1470	26.0688	7.28467	8.34041
1471	24.146	12.7795	8.5866
1472	24.3614	18.6852	9.33609
1473	38.5273	13.7462	8.84617
1474	18.9581	7.59466	8.52897
1475	29.9725	11.4951	7.68515
1476	35.9322	6.31183	8.70255
1477	46.4566	17.8255	8.4636
1478	49.2646	16.3269	8.75592
1479	39.6723	20.1568	9.50201
1480	48.2144	6.11545	8.29424
1481	43.8973	15.9263	8.83271
1482	52.8201	14.2134	10.2149
1483	18.2706	19.7579	8.48557
1484	42.9575	19.962	7.83727
1485	22.5938	16.8184	9.47292
1486	25.0297	21.4661	8.47654
1487	12.2949	17.9205	8.43532
1488	43.42	18.3247	8.57787
1489	23.9013	17.6162	9.76855
1490	44.7152	9.16465	8.51529
1491	15.3822	10.7746	8.04251
1492	31.5648	11.8237	9.34448
1493	28.2175	12.2081	8.18026
1494	41.6115	16.78	9.14049
1495	22.8473	13.3762	9.71234
1496	26.8107	13.2131	8.51967
1497	38.5776	15.8489	9.89666
1498	34.1691	13.1255	8.81438
1499	39.1628	14.5417	8.44037
1500	37.0221	10.2055	6.81378
1501	19.6324	18.7989	8.60585
1502	29.8374	19.4865	8.98857
1503	28.4833	16.4422	8.6909
1504	21.5887	17.2018	10.5682
1505	27.0733	16.7778	8.88
1506	38.0129	15.7183	8.77345
1507	30.2599	26.0878	8.04306
1508	44.1714	18.6988	9.45406
1509	21.3242	21.6066	9.29627
1510	31.9352	18.1846	10.1057
1511	31.06	12.3414	8.05792
1512	28.3227	16.4502	8.39749
1513	35.4469	17.9292	9.64855
1514	28.3832	7.69156	9.55091
1515	49.9794	21.7423	7.90943
1516	26.8425	25.0331	7.03575
1517	28.5771	14.4643	8.92547
1518	35.2425	10.3939	9.77
1519	34.7938	15.1903	7.79094
1520	24.2247	14.5094	9.59909
1521	24.0707	13.8538	9.38404
1522	32.4109	15.9566	8.04363
1523	21.7645	13.6625	8.19507
1524	30.8192	21.2338	9.68679
1525	31.5118	15.519	9.023
1526	49.8755	21.7737	8.43698
1527	34.7912	13.1763	8.97756
1528	24.5008	14.2098	8.70543
1529	30.5027	14.2905	8.44814
1530	31.2874	15.0028	8.83914
1531	25.4838	8.84935	8.83413
1532	32.5728	12.7871	8.90188
1533	34.0351	14.9055	9.02143
1534	48.7104	15.7448	8.50796
1535	31.6441	11.3508	9.56058
1536	26.8323	11.7319	8.72723
1537	32.3794	14.2541	8.26291
1538	31.6986	16.6548	7.27554
1539	30.4114	8.38503	9.19907
1540	52.2563	9.86761	8.89823
1541	33.7513	6.10638	9.2637
1542	33.7188	15.0935	9.89626
1543	49.085	14.7583	8.5659
1544	29.0688	15.7651	8.67546
1545	27.1342	11.5739	8.79905
1546	20.7915	16.6048	8.42577
1547	25.9767	21.0542	8.8267
1548	22.783	9.50013	8.40868
1549	37.2154	6.50105	7.76844
1550	43.5351	20.2307	8.32054
1551	52.0766	18.9495	8.8495
1552	46.3585	14.8415	8.8895
1553	43.5912	14.6221	9.33011
1554	30.7434	25.6386	8.61616
1555	27.2345	12.6559	9.0116
1556	21.1177	16.8294	10.0136
1557	41.5878	12.5733	9.07447
1558	45.6139	12.9386	8.05527
1559	43.3749	23.4304	8.56127
1560	10.8452	10.0044	9.04061
1561	50.9264	21.0285	10.7389
1562	42.3834	12.23	9.73492
1563	36.5016	13.9877	8.97972
1564	43.1014	11.5332	9.62023
1565	35.3354	19.0187	9.67051
1566	26.7319	12.2105	8.54561
1567	35.1233	11.609	9.4579
1568	42.265	9.86765	8.41776
1569	31.2965	15.0071	9.70137
1570	46.5037	11.7698	9.26314
1571	29.8275	19.2665	9.15781
1572	49.7681	10.4039	8.97217
1573	26.2729	16.9733	7.7809
1574	46.8443	9.39712	7.85269
1575	46.4762	8.07423	8.18126
1576	23.9685	17.0137	7.5942
1577	40.5689	12.0835	9.59399
1578	36.8675	16.5314	8.52169
1579	39.766	16.7022	8.19088
1580	31.3945	17.5207	9.18748
1581	40.3776	23.6978	8.02452
1582	20.2584	10.1726	7.73462
1583	24.1711	9.05026	8.05285
1584	31.067	10.9803	8.97372
1585	38.7622	24.9149	8.31403
1586	17.4459	11.0648	9.9267
1587	31.4914	18.8667	9.31677
1588	31.487	15.3764	8.31812
1589	33.3357	20.2094	8.89223
1590	28.3958	20.4892	8.45468
1591	36.4969	25.1457	8.92813
1592	28.895	15.1907	9.78342
1593	33.4037	18.5268	9.74858
1594	46.5398	6.67576	10.1168
1595	53.5793	18.2876	8.93247
1596	31.1151	18.5186	8.47662
1597	25.7629	11.8102	7.99696
1598	56.2429	23.8222	8.05996
1599	18.7502	24.325	9.26357
1600	49.3456	21.6367	8.62154
1601	13.8656	15.4512	10.1307
1602	26.0036	18.6836	9.63234
1603	34.6252	18.0863	7.66029
1604	13.0303	24.1244	9.46554
1605	41.7796	11.0461	7.80485
1606	23.1246	19.2267	7.61165
1607	42.8944	10.2365	9.91954
1608	45.1172	26.6523	7.49595
1609	48.2196	24.4205	9.22227
1610	47.6932	16.7238	8.52696
1611	33.2889	10.0294	8.94894
1612	44.7581	7.18646	9.03826
1613	44.4653	24.1141	7.94441
1614	23.8913	20.8907	9.59983
1615	39.5937	21.6393	8.65385
1616	28.3262	16.3787	8.60051
1617	44.5945	18.0642	9.0391
1618	42.4011	12.8153	9.36266
1619	36.4814	16.7859	9.38754
1620	37.1478	11.4855	9.08182
1621	34.5941	7.75239	7.91951
1622	33.533	12.9469	7.8483
1623	26.964	13.7366	7.63739
1624	11.5622	25.6022	10.1541
1625	20.3692	14.0816	9.14648
1626	55.894	10.277	8.64421
1627	36.1844	14.2898	9.1298
1628	41.0644	23.7775	8.4829
1629	46.5765	12.325	8.4443
1630	18.7889	15.239	7.90941
1631	58.9232	14.1121	9.66262
1632	30.2843	8.55972	9.53799
1633	39.9894	14.8503	8.5309
1634	43.1884	15.9803	7.07883
1635	41.95	13.8427	9.24306
1636	26.6486	21.895	8.84148
1637	39.4263	11.1549	9.68462
1638	44.0375	14.7788	8.18872
1639	28.7202	9.46228	7.73668
1640	24.1144	19.9822	8.60307
1641	52.8643	15.1843	8.7595
1642	29.1728	19.0845	8.32549
1643	36.8351	17.0225	7.54496
1644	28.8693	6.36633	9.32869
1645	43.1228	20.7379	8.17602
1646	17.7606	16.3756	9.09516
1647	48.8716	7.50089	8.89324
1648	30.008	9.55964	9.27437
1649	15.6713	13.8218	9.58389
1650	36.7109	12.7582	8.63143
1651	43.8852	16.0115	8.05055
1652	52.4213	19.0864	7.64776
1653	38.2555	15.2215	8.65229
1654	47.5661	11.4246	7.6056
1655	32.0969	18.2049	8.36144
1656	30.4647	21.8677	8.06644
1657	35.9544	19.6135	9.51543
1658	19.0921	8.41614	9.41253
1659	47.5802	10.4101	8.68293
1660	33.0752	17.9038	8.6324
1661	45.7917	17.4286	9.94942
1662	35.6223	23.3896	9.65636
1663	17.8494	8.92107	9.85868
1664	42.7228	10.3775	9.17295
1665	12.8342	21.3501	9.33719
1666	25.6301	13.7704	8.47735
1667	36.1812	17.2281	9.10984
1668	14.402	19.3804	8.18144
1669	38.3234	11.8994	9.97267
1670	16.5099	15.258	9.61343
1671	10.9324	12.7551	9.28745
1672	44.1303	15.6775	8.37136
1673	33.328	15.7309	9.81061
1674	53.2664	14.5663	7.10639
1675	33.607	10.5827	7.96981
1676	43.8364	14.8007	8.78557
1677	45.8641	16.1472	9.19684
1678	36.8723	26.1311	9.74738
1679	41.1972	14.6489	9.69036
1680	35.0862	9.27826	9.3864
1681	56.1701	24.0436	9.72555
1682	31.491	10.958	8.61156
1683	10.3181	9.20385	8.31196
1684	19.3769	11.7276	9.79803
1685	49.1698	21.9273	8.78427
1686	16.3721	18.2026	7.30962
1687	50.4107	17.1769	8.64268
1688	48.8211	16.8714	9.46676
1689	35.4699	18.0628	9.28983
1690	24.2498	14.0735	9.06158
1691	23.4958	15.7663	9.28247
1692	43.0191	10.3848	8.79198
1693	35.9003	12.489	7.79435
1694	51.2807	14.9335	8.09105
1695	13.6654	12.5692	8.44617
1696	31.847	21.4437	9.96013
1697	38.6827	14.0362	8.34593
1698	35.5952	20.7337	9.37596
1699	28.3129	21.6508	9.13834
1700	23.2366	6.23724	8.45389
1701	17.6815	13.5707	9.10222
1702	29.7281	14.8024	7.49608
1703	30.9006	18.2815	9.31262
1704	20.413	14.3221	8.53898
1705	26.2948	17.3902	9.67132
1706	44.7727	12.3139	8.96984
1707	38.1495	8.37313	8.05363
1708	30.5599	19.8413	7.60269
1709	48.3948	10.8162	9.20153
1710	24.3874	15.1213	9.48149
1711	9.53284	16.3125	9.08413
1712	39.079	14.5484	8.96638
1713	25.8516	12.0188	7.84836
1714	48.2307	13.4312	7.07882
1715	44.4982	16.6511	9.50369
1716	18.7937	10.247	8.72091
1717	29.7897	14.4242	9.11048
1718	39.5945	13.4248	9.01999
1719	11.178	20.9522	8.13313
1720	18.1632	17.6742	10.0629
1721	19.6404	11.1784	7.93905
1722	40.2194	18.3518	9.2688
1723	30.0846	15.1772	8.42096
1724	45.9015	17.2373	9.50645
1725	52.0465	24.719	8.48447
1726	50.5457	13.4027	10.8445
1727	24.0453	20.4141	8.48508
1728	49.1035	19.39	8.03935
1729	28.6514	16.3179	8.33558
1730	44.1105	13.7196	8.98907
1731	22.6991	15.1019	9.30319
1732	41.7695	18.6346	8.95186
1733	60.7184	15.3933	8.68172
1734	27.8538	19.084	8.8465
1735	31.8307	12.4462	8.43307
1736	14.9263	19.0231	9.15396
1737	47.395	21.9231	8.77356
1738	44.7771	19.5201	8.10407
1739	63.8161	17.7662	8.45942
1740	42.5207	23.0475	9.16007
1741	15.3579	18.2116	7.52958
1742	60.5057	16.0689	8.00899
1743	28.0241	21.2337	7.8316
1744	57.9271	15.5393	8.53056
1745	44.2305	17.9436	9.66328
1746	53.3716	6.81726	8.28631
1747	18.2579	9.12892	9.2254
1748	30.3708	14.3595	8.16554
1749	32.2476	11.4886	8.06986
1750	36.0725	15.1665	9.4746
1751	33.6197	11.8553	10.0795
1752	33.4956	12.4067	9.56642
1753	38.2164	19.7775	8.14382
1754	32.8561	17.8047	8.35742
1755	33.1736	21.8199	9.02903
1756	50.9803	14.0771	9.3347
1757	42.3321	16.7058	8.0401
1758	32.0864	21.7822	9.8201
1759	29.4739	17.808	9.78559
1760	60.7568	11.5469	7.9717
1761	48.9348	11.0541	8.42638
1762	24.6631	18.2428	9.9745
1763	38.3761	12.9459	8.29564
1764	29.176	19.563	7.73581
1765	31.6844	13.9745	8.38193
1766	26.9114	12.8741	9.40337
1767	29.126	14.4347	8.24386
1768	22.2189	21.2688	7.41186
1769	38.5447	7.77083	9.30518
1770	20.0204	20.0288	9.06308
1771	59.58	16.8213	9.54445
1772	30.2352	19.0526	8.71291
1773	64.0464	9.63166	8.20341
1774	36.47	15.09	8.24492
1775	35.8815	15.5842	10.1713
1776	27.889	19.6001	9.1832
1777	56.9817	18.6604	8.10767
1778	38.9757	21.9953	8.22548
1779	21.8497	10.3952	8.45271
1780	57.3037	12.215	9.76922
1781	20.8027	15.2944	8.40877
1782	30.1489	24.6609	8.47819
1783	39.9088	14.9792	10.6742
1784	42.3211	8.72025	8.73035
1785	47.4962	15.8295	10.1739
1786	19.7841	24.3177	8.74078
1787	47.1059	14.1112	8.39426
1788	30.4623	19.1803	10.0378
1789	11.3216	7.66904	8.7252
1790	26.278	15.3797	9.57342
1791	41.1447	15.5604	8.8997
1792	32.9749	17.7547	8.82614
1793	29.7149	19.232	9.26019
1794	38.3751	13.1282	10.2711
1795	30.716	12.1048	8.10513
1796	49.191	9.18054	9.47814
1797	38.7433	20.5835	8.02848
1798	23.9858	9.26451	8.37737
1799	25.2577	12.699	8.23382
1800	11.8293	19.2831	8.58429
1801	37.686	18.3213	7.53014
1802	42.8258	9.83352	8.66912
1803	49.6035	15.4242	8.36395
1804	32.4615	15.3636	7.98031
1805	38.0896	16.7439	8.67128
1806	31.0417	19.6169	8.7797
1807	54.0809	15.0727	9.50939
1808	23.7486	21.8468	9.25271
1809	54.5947	10.951	10.1621
1810	47.6054	18.1499	8.55569
1811	28.1743	12.2947	9.63715
1812	38.2071	14.8766	7.53059
1813	17.0938	14.7334	8.33056
1814	32.4777	15.3925	8.79383
1815	30.3534	14.8489	9.34822
1816	25.4601	18.0787	7.72298
1817	25.3293	24.8329	8.38989
1818	17.149	13.464	9.19513
1819	29.5427	15.6232	8.54158
1820	42.7648	17.6845	9.69166
1821	31.2849	13.7369	8.03638
1822	29.6507	16.2776	8.66612
1823	36.2412	12.836	8.48747
1824	41.7221	20.0253	9.95857
1825	30.795	17.6462	7.70432
1826	36.663	15.8691	7.9691
1827	31.0078	18.9468	9.46567
1828	24.5718	17.7755	9.15404
1829	18.2152	17.7312	9.02121
1830	17.4996	17.2653	10.2682
1831	26.0355	12.0081	8.29662
1832	33.2318	12.6558	7.99231
1833	42.8177	10.8713	8.84968
1834	43.236	18.2778	9.47938
1835	32.9139	14.5265	9.4305
1836	25.0386	17.5641	9.59822
1837	36.4496	17.4489	7.27671
1838	54.9926	22.171	9.51515
1839	28.3131	29.968	8.67685
1840	44.7928	23.0667	8.285
1841	33.1809	17.0793	7.13683
1842	14.5006	13.7855	8.73092
1843	33.5082	27.8435	8.93999
1844	42.3576	19.4976	8.62714
1845	35.8797	13.766	8.96898
1846	50.3915	17.0666	8.7506
1847	38.238	17.3142	9.8025
1848	37.6172	13.9475	7.97419
1849	50.3131	13.9592	6.83757
1850	59.9073	11.8731	8.22182
1851	38.7534	16.1588	7.79442
1852	23.6827	12.1938	9.41017
1853	50.2116	12.1533	8.9541
1854	35.1699	15.6909	8.00448
1855	23.1489	16.8505	8.99301
1856	43.0654	14.2074	10.0893
1857	33.2113	16.8254	9.49843
1858	29.2554	15.5047	8.46181
1859	38.9686	23.1126	9.42779
1860	53.051	13.3377	9.68175
1861	42.1065	25.0663	8.97208
1862	28.7131	21.9625	8.54685
1863	27.5555	23.292	7.47921
1864	24.5896	14.5427	9.68601
1865	37.5904	16.3258	7.8624
1866	39.8034	17.5407	8.04439
1867	35.4737	21.8324	8.90281
1868	27.0785	11.3887	8.59303
1869	31.6983	7.20228	9.92924
1870	26.3722	18.0049	9.48488
1871	9.74089	25.4539	9.40973
1872	50.9089	18.5733	9.24058
1873	20.5133	17.5616	9.17518
1874	42.7858	14.655	8.54188
1875	15.4195	17.3709	8.2952
1876	51.484	13.6559	9.59613
1877	39.5985	17.3796	8.25019
1878	31.7408	15.635	9.8256
1879	39.719	15.1428	8.21978
1880	36.3819	15.3751	9.84165
1881	41.6778	15.0676	9.00974
1882	39.4937	12.2469	9.54772
1883	29.6576	20.2223	9.03931
1884	31.2384	21.4863	8.30448
1885	31.6203	11.8127	7.93539
1886	10.9229	8.9267	8.9958
1887	23.4963	14.9364	8.40326
1888	40.4074	17.6062	8.84661
1889	37.8682	11.7399	9.72115
1890	25.0417	18.9154	8.70634
1891	36.5814	19.2972	8.52888
1892	23.3992	17.3537	7.70016
1893	24.2838	20.6511	8.01884
1894	20.4232	18.5592	8.6926
1895	15.9245	19.4992	9.13116
1896	50.6254	27.4847	9.58708
1897	22.6226	20.066	8.66682
1898	32.9917	20.3234	8.43272
1899	36.8308	14.1888	10.0053
1900	43.5396	23.3885	10.1206
1901	36.301	23.8299	8.77283
1902	40.5072	16.0895	8.93509
1903	35.691	7.9726	7.5373
1904	50.7816	7.61421	7.658
1905	53.6759	16.1111	8.56331
1906	48.3881	11.7384	9.35391
1907	24.7289	11.3473	8.42736
1908	60.2362	11.102	9.0115
1909	30.2756	25.1124	9.49897
1910	11.2531	12.0243	8.62641
1911	55.1293	16.493	9.23901
1912	38.4101	11.5174	8.122
1913	32.7667	6.48971	8.85636
1914	23.7809	17.8277	9.72496
1915	35.695	14.0794	8.55083
1916	30.8318	18.2788	8.01742
1917	36.5935	12.4927	9.16104
1918	53.9554	13.3733	9.44873
1919	24.7496	9.38168	7.77127
1920	29.9096	11.2709	8.77042
1921	28.1558	19.4256	9.44658
1922	12.9367	16.605	8.53409
1923	23.5887	7.43285	8.60794
1924	40.0139	7.27107	9.6708
1925	48.0988	13.9954	9.34352
1926	51.317	11.8659	7.99036
1927	37.9586	21.7859	9.09863
1928	16.1578	14.9213	7.95697
1929	33.0883	14.5947	7.74272
1930	29.1406	18.7209	7.85277
1931	39.6743	17.3182	8.78627
1932	23.3385	23.5892	9.25305
1933	63.4337	17.8322	8.77333
1934	25.2917	16.8014	9.4252
1935	37.8665	15.9235	8.77328
1936	12.3669	17.2302	9.19588
1937	42.582	22.1751	9.16357
1938	37.2513	10.1011	9.54742
1939	34.6943	16.2519	7.67434
1940	59.3675	13.2943	9.32954
1941	23.315	20.3407	8.71324
1942	32.2771	7.32989	9.14663
1943	59.1111	8.18935	9.26113
1944	28.8613	10.1273	9.06318
1945	30.6913	14.5286	9.70276
1946	35.3557	11.4594	8.87603
1947	26.2361	15.799	8.59855
1948	49.2547	13.7108	9.17559
1949	42.6816	12.446	10.3592
1950	23.2719	13.9978	9.1846
1951	31.8917	18.5765	7.91111
1952	27.1415	14.7089	9.3839
1953	26.2044	15.0296	8.66651
1954	32.0994	16.1051	9.89365
1955	21.3824	11.2106	7.3289
1956	40.2731	12.8528	8.55408
1957	43.334	15.9736	9.02123
1958	28.9074	12.8778	8.37782
1959	23.2697	15.5495	8.73388
1960	51.2289	19.7118	9.65144
1961	38.1629	17.4699	10.3189
1962	40.0077	14.0105	7.27377
1963	38.7224	16.073	8.60962
1964	38.6976	19.1209	8.38455
1965	26.2144	10.6023	8.90485
1966	41.1875	19.301	9.74252
1967	29.7722	13.8466	7.97731
1968	39.2445	18.7279	7.3916
1969	41.0443	10.9153	9.19899
1970	32.9651	21.1304	8.98314
1971	17.6715	16.2497	8.23619
1972	16.9961	15.3488	7.72696
1973	39.7053	18.6892	8.25339
1974	38.1086	18.7293	8.80059
1975	36.6406	25.7827	9.01797
1976	37.2299	14.3972	8.37335
1977	54.6907	8.82201	9.12672
1978	50.0044	22.4731	9.12518
1979	40.1316	15.9041	7.73089
1980	39.6266	14.9808	7.06533
1981	46.1213	19.9315	9.389
1982	22.2255	13.6638	7.61982
1983	32.8363	12.1334	9.85066
1984	20.9158	9.99849	7.17043
1985	37.0418	8.46933	8.66427
1986	53.4106	14.4949	7.46596
1987	39.9952	17.4106	9.5872
1988	31.4258	18.1613	8.83086
1989	64.5735	9.55416	8.8793
1990	40.4644	16.0724	7.77398
1991	52.7652	15.8628	8.14174
1992	28.8749	23.7733	8.8941
1993	27.7109	19.3087	8.75979
1994	35.8971	19.0966	9.41099
1995	29.8842	15.9662	8.33559
1996	34.8497	18.8062	9.03943
1997	31.7891	7.18197	8.87308
1998	42.6594	17.9718	7.77248
1999	15.5821	15.4172	7.87425
[truncated: 8,001 more rows]

## Sheet: Simulation Output Values 1
Sim #	ADD	ADDc	CR	HQ
1	4.39985e-05	5.32641e-06	3.55094e-06	0.146662
2	7.65986e-05	9.27293e-06	6.18196e-06	0.255329
3	8.74103e-05	1.05818e-05	7.05453e-06	0.291368
4	6.08199e-05	7.36278e-06	4.90852e-06	0.202733
5	0.000124896	1.51197e-05	1.00798e-05	0.41632
6	4.43661e-05	5.37091e-06	3.58061e-06	0.147887
7	9.67547e-05	1.1713e-05	7.80867e-06	0.322516
8	8.49827e-05	1.02879e-05	6.8586e-06	0.283276
9	3.45029e-05	4.17688e-06	2.78459e-06	0.11501
10	4.3796e-05	5.30189e-06	3.53459e-06	0.145987
11	3.67394e-05	4.44763e-06	2.96509e-06	0.122465
12	2.46833e-05	2.98813e-06	1.99209e-06	0.0822777
13	0.00011986	1.45101e-05	9.67341e-06	0.399533
14	8.68439e-05	1.05132e-05	7.00882e-06	0.28948
15	7.49147e-05	9.06909e-06	6.04606e-06	0.249716
16	5.21058e-05	6.30786e-06	4.20524e-06	0.173686
17	3.15618e-05	3.82083e-06	2.54722e-06	0.105206
18	8.55688e-05	1.03589e-05	6.90591e-06	0.285229
19	4.31535e-05	5.22411e-06	3.48274e-06	0.143845
20	9.21135e-05	1.11512e-05	7.43411e-06	0.307045
21	4.46715e-05	5.40788e-06	3.60525e-06	0.148905
22	5.54906e-05	6.71762e-06	4.47842e-06	0.184969
23	5.2433e-05	6.34748e-06	4.23165e-06	0.174777
24	6.89416e-05	8.34599e-06	5.564e-06	0.229805
25	2.79565e-05	3.38438e-06	2.25626e-06	0.0931884
26	3.67005e-05	4.44292e-06	2.96195e-06	0.122335
27	0.000107428	1.30051e-05	8.67006e-06	0.358093
28	9.92301e-05	1.20127e-05	8.00845e-06	0.330767
29	4.74949e-05	5.74967e-06	3.83312e-06	0.158316
30	0.000107867	1.30582e-05	8.70548e-06	0.359556
31	5.51591e-05	6.6775e-06	4.45167e-06	0.183864
32	3.42782e-05	4.14968e-06	2.76645e-06	0.114261
33	5.54491e-05	6.71261e-06	4.47507e-06	0.18483
34	8.72296e-05	1.05599e-05	7.03995e-06	0.290765
35	7.87683e-05	9.5356e-06	6.35707e-06	0.262561
36	8.34528e-05	1.01027e-05	6.73513e-06	0.278176
37	6.42784e-05	7.78147e-06	5.18765e-06	0.214261
38	5.89217e-05	7.13299e-06	4.75532e-06	0.196406
39	0.000102951	1.24631e-05	8.30877e-06	0.343171
40	7.37044e-05	8.92256e-06	5.94838e-06	0.245681
41	8.49301e-05	1.02815e-05	6.85436e-06	0.2831
42	6.56945e-05	7.9529e-06	5.30193e-06	0.218982
43	7.87001e-05	9.52734e-06	6.35156e-06	0.262334
44	2.29971e-05	2.784e-06	1.856e-06	0.076657
45	3.95012e-05	4.78196e-06	3.18798e-06	0.131671
46	0.0001036	1.25417e-05	8.36113e-06	0.345334
47	7.65762e-05	9.27022e-06	6.18015e-06	0.255254
48	0.000103612	1.25431e-05	8.36207e-06	0.345372
49	3.38782e-05	4.10125e-06	2.73417e-06	0.112927
50	6.2811e-05	7.60383e-06	5.06922e-06	0.20937
51	4.73983e-05	5.73798e-06	3.82532e-06	0.157994
52	5.30092e-05	6.41723e-06	4.27816e-06	0.176697
53	8.76488e-05	1.06107e-05	7.07377e-06	0.292163
54	8.97485e-05	1.08648e-05	7.24323e-06	0.299162
55	6.79891e-05	8.23068e-06	5.48712e-06	0.22663
56	1.49277e-05	1.80713e-06	1.20476e-06	0.0497591
57	2.51699e-05	3.04703e-06	2.03136e-06	0.0838995
58	4.50853e-05	5.45798e-06	3.63865e-06	0.150284
59	6.16935e-05	7.46854e-06	4.97903e-06	0.205645
60	5.8814e-05	7.11996e-06	4.74664e-06	0.196047
61	9.22569e-05	1.11685e-05	7.44567e-06	0.307523
62	0.000115235	1.39502e-05	9.30012e-06	0.384116
63	3.08054e-05	3.72926e-06	2.48618e-06	0.102685
64	7.25924e-05	8.78795e-06	5.85864e-06	0.241975
65	0.000111077	1.34469e-05	8.96458e-06	0.370257
66	3.99897e-05	4.84111e-06	3.2274e-06	0.133299
67	3.14099e-05	3.80245e-06	2.53497e-06	0.1047
68	8.5751e-05	1.03809e-05	6.92061e-06	0.285837
69	0.000127839	1.54761e-05	1.03174e-05	0.42613
70	4.93256e-05	5.9713e-06	3.98087e-06	0.164419
71	4.50679e-05	5.45587e-06	3.63725e-06	0.150226
72	3.08513e-05	3.73482e-06	2.48988e-06	0.102838
73	3.55036e-05	4.29802e-06	2.86535e-06	0.118345
74	5.20781e-05	6.30451e-06	4.20301e-06	0.173594
75	0.00021186	2.56475e-05	1.70983e-05	0.706199
76	6.64013e-05	8.03847e-06	5.35898e-06	0.221338
77	5.22433e-05	6.32452e-06	4.21634e-06	0.174144
78	8.49781e-05	1.02873e-05	6.85823e-06	0.28326
79	7.68757e-05	9.30648e-06	6.20432e-06	0.256252
80	3.67978e-05	4.45469e-06	2.9698e-06	0.122659
81	0.000111046	1.34431e-05	8.96208e-06	0.370154
82	4.03155e-05	4.88054e-06	3.25369e-06	0.134385
83	6.00615e-05	7.27098e-06	4.84732e-06	0.200205
84	8.37315e-05	1.01364e-05	6.75763e-06	0.279105
85	4.43793e-05	5.3725e-06	3.58167e-06	0.147931
86	7.24617e-05	8.77213e-06	5.84809e-06	0.241539
87	8.92823e-05	1.08084e-05	7.20561e-06	0.297608
88	5.1944e-05	6.28828e-06	4.19219e-06	0.173147
89	4.61131e-05	5.5824e-06	3.7216e-06	0.15371
90	4.20846e-05	5.09471e-06	3.39647e-06	0.140282
91	4.04732e-05	4.89964e-06	3.26643e-06	0.134911
92	2.52014e-05	3.05085e-06	2.0339e-06	0.0840047
93	6.21418e-05	7.52281e-06	5.01521e-06	0.207139
94	9.33863e-05	1.13052e-05	7.53682e-06	0.311288
95	8.02285e-05	9.71237e-06	6.47491e-06	0.267428
96	3.91327e-05	4.73736e-06	3.15824e-06	0.130442
97	4.73918e-05	5.73719e-06	3.8248e-06	0.157973
98	6.85505e-05	8.29864e-06	5.53243e-06	0.228502
99	6.20868e-05	7.51616e-06	5.01077e-06	0.206956
100	6.11709e-05	7.40528e-06	4.93685e-06	0.203903
101	7.50896e-05	9.09026e-06	6.06017e-06	0.250299
102	4.38855e-05	5.31273e-06	3.54182e-06	0.146285
103	6.71133e-05	8.12466e-06	5.41644e-06	0.223711
104	8.5794e-05	1.03861e-05	6.92408e-06	0.28598
105	4.22836e-05	5.11881e-06	3.41254e-06	0.140945
106	5.90445e-05	7.14785e-06	4.76524e-06	0.196815
107	0.000101865	1.23316e-05	8.22109e-06	0.339549
108	4.60026e-05	5.56902e-06	3.71268e-06	0.153342
109	0.000141983	1.71883e-05	1.14589e-05	0.473278
110	5.84553e-05	7.07653e-06	4.71768e-06	0.194851
111	4.09099e-05	4.9525e-06	3.30167e-06	0.136366
112	5.68461e-05	6.88172e-06	4.58782e-06	0.189487
113	8.22645e-05	9.95884e-06	6.63923e-06	0.274215
114	0.000105556	1.27785e-05	8.51897e-06	0.351853
115	7.75379e-05	9.38665e-06	6.25777e-06	0.25846
116	0.000204009	2.46971e-05	1.64647e-05	0.680031
117	4.25655e-05	5.15294e-06	3.43529e-06	0.141885
118	8.43891e-05	1.0216e-05	6.8107e-06	0.281297
119	8.80083e-05	1.06542e-05	7.10279e-06	0.293361
120	8.06374e-05	9.76186e-06	6.50791e-06	0.268791
121	6.34862e-05	7.68557e-06	5.12371e-06	0.211621
122	7.76686e-05	9.40246e-06	6.26831e-06	0.258895
123	3.57764e-05	4.33105e-06	2.88737e-06	0.119255
124	6.07758e-05	7.35745e-06	4.90497e-06	0.202586
125	5.13434e-05	6.21557e-06	4.14371e-06	0.171145
126	6.86538e-05	8.31114e-06	5.54076e-06	0.228846
127	5.56043e-05	6.73139e-06	4.48759e-06	0.185348
128	4.6886e-05	5.67597e-06	3.78398e-06	0.156287
129	4.24741e-05	5.14187e-06	3.42791e-06	0.14158
130	3.71645e-05	4.4991e-06	2.9994e-06	0.123882
131	7.67574e-05	9.29216e-06	6.19478e-06	0.255858
132	3.79809e-05	4.59792e-06	3.06528e-06	0.126603
133	7.59596e-05	9.19558e-06	6.13038e-06	0.253199
134	8.89699e-05	1.07706e-05	7.1804e-06	0.296566
135	6.11985e-05	7.40862e-06	4.93908e-06	0.203995
136	4.76278e-05	5.76577e-06	3.84384e-06	0.158759
137	7.12999e-05	8.63149e-06	5.75432e-06	0.237666
138	3.56024e-05	4.30999e-06	2.87333e-06	0.118675
139	7.32696e-05	8.86994e-06	5.91329e-06	0.244232
140	6.75516e-05	8.17771e-06	5.45181e-06	0.225172
141	0.000143918	1.74225e-05	1.1615e-05	0.479726
142	5.93691e-05	7.18715e-06	4.79143e-06	0.197897
143	7.10083e-05	8.59618e-06	5.73078e-06	0.236694
144	9.19859e-05	1.11357e-05	7.4238e-06	0.30662
145	6.32408e-05	7.65586e-06	5.1039e-06	0.210803
146	5.53457e-05	6.70008e-06	4.46672e-06	0.184486
147	4.80899e-05	5.82171e-06	3.88114e-06	0.1603
148	1.44334e-05	1.74729e-06	1.16486e-06	0.0481114
149	6.93205e-05	8.39186e-06	5.59457e-06	0.231068
150	6.40827e-05	7.75778e-06	5.17185e-06	0.213609
151	2.89503e-05	3.50469e-06	2.33646e-06	0.0965009
152	3.25107e-05	3.93571e-06	2.6238e-06	0.108369
153	6.22326e-05	7.53381e-06	5.02254e-06	0.207442
154	4.14168e-05	5.01387e-06	3.34258e-06	0.138056
155	3.24018e-05	3.92253e-06	2.61502e-06	0.108006
156	4.69147e-05	5.67943e-06	3.78629e-06	0.156382
157	4.84628e-05	5.86685e-06	3.91124e-06	0.161543
158	6.99343e-05	8.46616e-06	5.64411e-06	0.233114
159	6.81427e-05	8.24927e-06	5.49952e-06	0.227142
160	6.9371e-05	8.39798e-06	5.59865e-06	0.231237
161	0.000131062	1.58663e-05	1.05775e-05	0.436875
162	6.16604e-05	7.46453e-06	4.97635e-06	0.205535
163	0.000126676	1.53353e-05	1.02235e-05	0.422254
164	0.000137221	1.66118e-05	1.10745e-05	0.457403
165	5.31014e-05	6.42839e-06	4.2856e-06	0.177005
166	0.000142676	1.72722e-05	1.15148e-05	0.475587
167	0.000126003	1.52538e-05	1.01692e-05	0.420011
168	2.71124e-05	3.28219e-06	2.18813e-06	0.0903746
169	5.80146e-05	7.02317e-06	4.68212e-06	0.193382
170	5.47079e-05	6.62287e-06	4.41525e-06	0.18236
171	5.71454e-05	6.91796e-06	4.61197e-06	0.190485
172	6.84794e-05	8.29004e-06	5.52669e-06	0.228265
173	0.000258098	3.1245e-05	2.083e-05	0.860327
174	7.96201e-05	9.63872e-06	6.42581e-06	0.2654
175	3.54809e-05	4.29527e-06	2.86351e-06	0.11827
176	8.72828e-05	1.05664e-05	7.04424e-06	0.290943
177	7.42771e-05	8.9919e-06	5.9946e-06	0.24759
178	6.46454e-05	7.8259e-06	5.21727e-06	0.215485
179	4.94132e-05	5.98191e-06	3.98794e-06	0.164711
180	5.09445e-05	6.16728e-06	4.11152e-06	0.169815
181	4.50467e-05	5.4533e-06	3.63553e-06	0.150156
182	7.79123e-05	9.43197e-06	6.28798e-06	0.259708
183	5.99829e-05	7.26146e-06	4.84098e-06	0.199943
184	8.07603e-05	9.77675e-06	6.51783e-06	0.269201
185	9.67583e-05	1.17135e-05	7.80897e-06	0.322528
186	4.3163e-05	5.22527e-06	3.48351e-06	0.143877
187	8.8529e-05	1.07172e-05	7.14481e-06	0.295097
188	3.15193e-05	3.81568e-06	2.54379e-06	0.105064
189	3.28745e-05	3.97974e-06	2.65316e-06	0.109582
190	6.93843e-05	8.39958e-06	5.59972e-06	0.231281
191	6.65901e-05	8.06132e-06	5.37421e-06	0.221967
192	7.1128e-05	8.61067e-06	5.74045e-06	0.237093
193	0.000113435	1.37323e-05	9.15488e-06	0.378117
194	4.64687e-05	5.62545e-06	3.7503e-06	0.154896
195	9.36488e-05	1.1337e-05	7.55801e-06	0.312163
196	8.64161e-05	1.04614e-05	6.97429e-06	0.288054
197	6.90378e-05	8.35763e-06	5.57176e-06	0.230126
198	0.000111447	1.34916e-05	8.99443e-06	0.37149
199	6.2576e-05	7.57538e-06	5.05025e-06	0.208587
200	6.68088e-05	8.0878e-06	5.39187e-06	0.222696
201	7.7724e-05	9.40917e-06	6.27278e-06	0.25908
202	8.84213e-05	1.07042e-05	7.13612e-06	0.294738
203	5.0004e-05	6.05343e-06	4.03562e-06	0.16668
204	6.85379e-05	8.29711e-06	5.53141e-06	0.22846
205	9.49254e-05	1.14916e-05	7.66104e-06	0.316418
206	7.63408e-05	9.24173e-06	6.16115e-06	0.254469
207	9.46595e-05	1.14594e-05	7.63958e-06	0.315532
208	4.40722e-05	5.33532e-06	3.55688e-06	0.146907
209	4.16706e-05	5.0446e-06	3.36307e-06	0.138902
210	5.39476e-05	6.53083e-06	4.35389e-06	0.179825
211	0.000122097	1.47809e-05	9.85394e-06	0.40699
212	3.46325e-05	4.19257e-06	2.79505e-06	0.115442
213	5.46156e-05	6.6117e-06	4.4078e-06	0.182052
214	4.81508e-05	5.82907e-06	3.88605e-06	0.160503
215	3.16322e-05	3.82936e-06	2.5529e-06	0.105441
216	6.22575e-05	7.53681e-06	5.02454e-06	0.207525
217	6.2744e-05	7.59572e-06	5.06381e-06	0.209147
218	0.000111925	1.35495e-05	9.03301e-06	0.373083
219	4.8275e-05	5.84411e-06	3.89608e-06	0.160917
220	5.39101e-05	6.5263e-06	4.35087e-06	0.1797
221	3.7517e-05	4.54176e-06	3.02784e-06	0.125057
222	4.48252e-05	5.42648e-06	3.61766e-06	0.149417
223	5.19127e-05	6.28449e-06	4.18966e-06	0.173042
224	5.87616e-05	7.11361e-06	4.74241e-06	0.195872
225	7.90752e-05	9.57275e-06	6.38183e-06	0.263584
226	6.50043e-05	7.86934e-06	5.24623e-06	0.216681
227	5.3384e-05	6.4626e-06	4.3084e-06	0.177947
228	9.62868e-05	1.16564e-05	7.77091e-06	0.320956
229	2.89407e-05	3.50352e-06	2.33568e-06	0.0964689
230	7.71139e-05	9.33532e-06	6.22354e-06	0.257046
231	6.77658e-05	8.20365e-06	5.4691e-06	0.225886
232	0.000113269	1.37122e-05	9.14145e-06	0.377562
233	3.57716e-05	4.33046e-06	2.88697e-06	0.119239
234	8.39136e-05	1.01585e-05	6.77232e-06	0.279712
235	0.000135701	1.64278e-05	1.09519e-05	0.452337
236	0.00018049	2.18499e-05	1.45666e-05	0.601632
237	8.54024e-05	1.03387e-05	6.89248e-06	0.284675
238	4.50174e-05	5.44975e-06	3.63317e-06	0.150058
239	2.34413e-05	2.83777e-06	1.89185e-06	0.0781375
240	4.29425e-05	5.19856e-06	3.46571e-06	0.143142
241	6.44645e-05	7.804e-06	5.20267e-06	0.214882
242	6.35091e-05	7.68834e-06	5.12556e-06	0.211697
243	5.13341e-05	6.21444e-06	4.14296e-06	0.171114
244	5.19945e-05	6.2944e-06	4.19626e-06	0.173315
245	5.03794e-05	6.09887e-06	4.06591e-06	0.167931
246	3.90643e-05	4.72907e-06	3.15272e-06	0.130214
247	2.69371e-05	3.26097e-06	2.17398e-06	0.0897903
248	0.000216579	2.62188e-05	1.74792e-05	0.721931
249	2.68168e-05	3.24641e-06	2.16427e-06	0.0893894
250	0.000104116	1.26042e-05	8.40278e-06	0.347054
251	4.62579e-05	5.59992e-06	3.73328e-06	0.154193
252	3.41133e-05	4.12972e-06	2.75315e-06	0.113711
253	6.69905e-05	8.10979e-06	5.40653e-06	0.223302
254	4.51694e-05	5.46815e-06	3.64544e-06	0.150565
255	6.84654e-05	8.28834e-06	5.52556e-06	0.228218
256	0.000101208	1.22521e-05	8.16808e-06	0.33736
257	8.80953e-05	1.06647e-05	7.10981e-06	0.293651
258	0.00011725	1.41941e-05	9.46277e-06	0.390833
259	7.1835e-05	8.69627e-06	5.79751e-06	0.23945
260	7.8428e-05	9.49441e-06	6.3296e-06	0.261427
261	4.57501e-05	5.53845e-06	3.6923e-06	0.1525
262	5.41998e-05	6.56137e-06	4.37425e-06	0.180666
263	0.000336367	4.07202e-05	2.71468e-05	1.12122
264	5.85549e-05	7.08858e-06	4.72572e-06	0.195183
265	3.59881e-05	4.35668e-06	2.90445e-06	0.11996
266	4.10625e-05	4.97098e-06	3.31399e-06	0.136875
267	0.000115757	1.40134e-05	9.34225e-06	0.385856
268	4.79611e-05	5.80611e-06	3.87074e-06	0.15987
269	7.8864e-05	9.54718e-06	6.36479e-06	0.26288
270	8.19796e-05	9.92436e-06	6.61624e-06	0.273265
271	4.85744e-05	5.88036e-06	3.92024e-06	0.161915
272	0.000125355	1.51753e-05	1.01169e-05	0.41785
273	3.75447e-05	4.54512e-06	3.03008e-06	0.125149
274	0.000146979	1.77931e-05	1.1862e-05	0.489929
275	4.09205e-05	4.95378e-06	3.30252e-06	0.136402
276	4.29564e-05	5.20025e-06	3.46683e-06	0.143188
277	5.62518e-05	6.80978e-06	4.53985e-06	0.187506
278	4.35431e-05	5.27128e-06	3.51418e-06	0.145144
279	7.13824e-05	8.64147e-06	5.76098e-06	0.237941
280	7.7472e-05	9.37867e-06	6.25245e-06	0.25824
281	5.99718e-05	7.26012e-06	4.84008e-06	0.199906
282	3.25523e-05	3.94075e-06	2.62716e-06	0.108508
283	0.000207891	2.51671e-05	1.67781e-05	0.692971
284	0.000149999	1.81587e-05	1.21058e-05	0.499997
285	3.57512e-05	4.328e-06	2.88533e-06	0.119171
286	2.13846e-05	2.58879e-06	1.72586e-06	0.0712818
287	7.19314e-05	8.70793e-06	5.80529e-06	0.239771
288	5.51592e-05	6.67751e-06	4.45167e-06	0.183864
289	7.17551e-05	8.68659e-06	5.79106e-06	0.239184
290	4.266e-05	5.16437e-06	3.44292e-06	0.1422
291	4.96917e-05	6.01562e-06	4.01042e-06	0.165639
292	5.02201e-05	6.07959e-06	4.05306e-06	0.1674
293	1.75311e-05	2.12229e-06	1.41486e-06	0.0584369
294	6.17201e-05	7.47177e-06	4.98118e-06	0.205734
295	0.000108371	1.31193e-05	8.74619e-06	0.361237
296	6.60291e-05	7.9934e-06	5.32893e-06	0.220097
297	3.99649e-05	4.8381e-06	3.2254e-06	0.133216
298	6.17852e-05	7.47964e-06	4.98643e-06	0.205951
299	3.04846e-05	3.69043e-06	2.46029e-06	0.101615
300	7.82501e-05	9.47287e-06	6.31525e-06	0.260834
301	4.49726e-05	5.44433e-06	3.62955e-06	0.149909
302	0.000114369	1.38453e-05	9.23021e-06	0.381228
303	7.57136e-05	9.1658e-06	6.11053e-06	0.252379
304	3.77849e-05	4.5742e-06	3.04947e-06	0.12595
305	1.97564e-05	2.39168e-06	1.59446e-06	0.0658546
306	0.000118948	1.43997e-05	9.59979e-06	0.396493
307	3.948e-05	4.7794e-06	3.18627e-06	0.1316
308	3.76901e-05	4.56271e-06	3.04181e-06	0.125634
309	0.000140843	1.70503e-05	1.13669e-05	0.469477
310	0.000120213	1.45528e-05	9.70186e-06	0.400709
311	0.000124902	1.51205e-05	1.00804e-05	0.416341
312	3.76939e-05	4.56319e-06	3.04212e-06	0.125646
313	4.96043e-05	6.00504e-06	4.00336e-06	0.165348
314	3.49819e-05	4.23487e-06	2.82325e-06	0.116606
315	6.90116e-05	8.35446e-06	5.56964e-06	0.230039
316	7.21089e-05	8.72941e-06	5.81961e-06	0.240363
317	6.64881e-05	8.04898e-06	5.36598e-06	0.221627
318	0.000174003	2.10646e-05	1.40431e-05	0.58001
319	7.71509e-05	9.3398e-06	6.22653e-06	0.25717
320	9.39539e-05	1.1374e-05	7.58264e-06	0.31318
321	7.34637e-05	8.89343e-06	5.92895e-06	0.244879
322	5.97484e-05	7.23307e-06	4.82205e-06	0.199161
323	5.41284e-05	6.55272e-06	4.36848e-06	0.180428
324	3.4949e-05	4.23089e-06	2.82059e-06	0.116497
325	0.000123519	1.49531e-05	9.96873e-06	0.411731
326	4.28258e-05	5.18445e-06	3.4563e-06	0.142753
327	0.000116261	1.40744e-05	9.38294e-06	0.387536
328	7.00374e-05	8.47865e-06	5.65243e-06	0.233458
329	0.000104077	1.25995e-05	8.39966e-06	0.346925
330	6.77806e-05	8.20544e-06	5.47029e-06	0.225935
331	4.53648e-05	5.49181e-06	3.6612e-06	0.151216
332	9.13039e-05	1.10531e-05	7.36877e-06	0.304346
333	1.95494e-05	2.36663e-06	1.57775e-06	0.0651647
334	4.28265e-05	5.18453e-06	3.45635e-06	0.142755
335	9.88436e-05	1.19659e-05	7.97726e-06	0.329479
336	0.000124153	1.50298e-05	1.00198e-05	0.413842
337	3.43924e-05	4.16351e-06	2.77567e-06	0.114641
338	7.88952e-05	9.55096e-06	6.36731e-06	0.262984
339	9.84384e-05	1.19168e-05	7.94456e-06	0.328128
340	6.46626e-05	7.82797e-06	5.21865e-06	0.215542
341	6.0286e-05	7.29815e-06	4.86543e-06	0.200953
342	2.68063e-05	3.24514e-06	2.16343e-06	0.0893545
343	6.16092e-05	7.45834e-06	4.97223e-06	0.205364
344	8.02849e-05	9.7192e-06	6.47947e-06	0.267616
345	6.81626e-05	8.25169e-06	5.50112e-06	0.227209
346	2.49748e-05	3.02342e-06	2.01562e-06	0.0832494
347	0.000105013	1.27128e-05	8.4752e-06	0.350045
348	5.58402e-05	6.75994e-06	4.50663e-06	0.186134
349	6.30428e-05	7.63188e-06	5.08792e-06	0.210143
350	3.62834e-05	4.39242e-06	2.92828e-06	0.120945
351	9.09914e-05	1.10153e-05	7.34354e-06	0.303305
352	3.82362e-05	4.62883e-06	3.08588e-06	0.127454
353	8.93683e-05	1.08188e-05	7.21255e-06	0.297894
354	0.00012508	1.5142e-05	1.00947e-05	0.416933
355	7.43495e-05	9.00067e-06	6.00045e-06	0.247832
356	4.30016e-05	5.20572e-06	3.47048e-06	0.143339
357	6.9252e-05	8.38357e-06	5.58904e-06	0.23084
358	6.70507e-05	8.11708e-06	5.41139e-06	0.223502
359	8.49393e-05	1.02826e-05	6.8551e-06	0.283131
360	6.74386e-05	8.16404e-06	5.44269e-06	0.224795
361	0.000158946	1.92418e-05	1.28279e-05	0.529819
362	5.75156e-05	6.96277e-06	4.64184e-06	0.191719
363	4.1159e-05	4.98266e-06	3.32177e-06	0.137197
364	5.66771e-05	6.86126e-06	4.57417e-06	0.188924
365	3.1908e-05	3.86275e-06	2.57517e-06	0.10636
366	7.44311e-05	9.01055e-06	6.00703e-06	0.248104
367	5.75151e-05	6.96271e-06	4.6418e-06	0.191717
368	8.77407e-05	1.06218e-05	7.08119e-06	0.292469
369	3.68181e-05	4.45715e-06	2.97144e-06	0.122727
370	6.10903e-05	7.39552e-06	4.93035e-06	0.203634
371	4.11691e-05	4.98388e-06	3.32259e-06	0.13723
372	3.80018e-05	4.60045e-06	3.06697e-06	0.126673
373	6.78487e-05	8.21368e-06	5.47579e-06	0.226162
374	6.21641e-05	7.52552e-06	5.01701e-06	0.207214
375	4.71757e-05	5.71103e-06	3.80735e-06	0.157252
376	5.3667e-05	6.49687e-06	4.33124e-06	0.17889
377	4.99398e-05	6.04565e-06	4.03043e-06	0.166466
378	4.32871e-05	5.24028e-06	3.49352e-06	0.14429
379	8.02926e-05	9.72013e-06	6.48009e-06	0.267642
380	3.88327e-05	4.70104e-06	3.13403e-06	0.129442
381	4.48301e-05	5.42708e-06	3.61805e-06	0.149434
382	9.30595e-05	1.12657e-05	7.51045e-06	0.310198
383	5.96305e-05	7.2188e-06	4.81253e-06	0.198768
384	4.31098e-05	5.21882e-06	3.47922e-06	0.143699
385	4.8837e-05	5.91215e-06	3.94144e-06	0.16279
386	2.03143e-05	2.45923e-06	1.63949e-06	0.0677144
387	3.40304e-05	4.11968e-06	2.74645e-06	0.113435
388	8.64708e-05	1.04681e-05	6.97871e-06	0.288236
389	4.5169e-05	5.4681e-06	3.6454e-06	0.150563
390	7.1984e-05	8.7143e-06	5.80953e-06	0.239947
391	8.419e-05	1.01919e-05	6.79462e-06	0.280633
392	7.3341e-05	8.87858e-06	5.91905e-06	0.24447
393	0.000102774	1.24417e-05	8.29444e-06	0.342579
394	0.000117547	1.42301e-05	9.48676e-06	0.391824
395	3.622e-05	4.38475e-06	2.92317e-06	0.120733
396	0.000102163	1.23677e-05	8.24515e-06	0.340543
397	0.000309471	3.74642e-05	2.49761e-05	1.03157
398	8.56861e-05	1.03731e-05	6.91537e-06	0.28562
399	5.19323e-05	6.28686e-06	4.19124e-06	0.173108
400	9.28382e-05	1.12389e-05	7.49259e-06	0.309461
401	4.22005e-05	5.10874e-06	3.40583e-06	0.140668
402	2.8359e-05	3.43311e-06	2.28874e-06	0.0945302
403	6.71972e-05	8.13481e-06	5.42321e-06	0.223991
404	2.7038e-05	3.27319e-06	2.18212e-06	0.0901266
405	4.65872e-05	5.6398e-06	3.75986e-06	0.155291
406	0.000111977	1.35558e-05	9.03718e-06	0.373256
407	4.00728e-05	4.85116e-06	3.23411e-06	0.133576
408	7.50688e-05	9.08774e-06	6.05849e-06	0.250229
409	1.90328e-05	2.30408e-06	1.53606e-06	0.0634425
410	2.38572e-05	2.88813e-06	1.92542e-06	0.0795241
411	7.19661e-05	8.71213e-06	5.80809e-06	0.239887
412	6.27145e-05	7.59215e-06	5.06143e-06	0.209048
413	3.81348e-05	4.61655e-06	3.0777e-06	0.127116
414	0.000142285	1.72249e-05	1.14833e-05	0.474285
415	9.83194e-05	1.19024e-05	7.93495e-06	0.327731
416	2.90247e-05	3.51369e-06	2.34246e-06	0.0967489
417	5.787e-05	7.00567e-06	4.67045e-06	0.1929
418	2.93818e-05	3.55693e-06	2.37128e-06	0.0979393
419	4.12138e-05	4.9893e-06	3.3262e-06	0.137379
420	3.86231e-05	4.67566e-06	3.11711e-06	0.128744
421	0.000102256	1.2379e-05	8.25266e-06	0.340853
422	3.53421e-05	4.27848e-06	2.85232e-06	0.117807
423	6.4013e-05	7.74934e-06	5.16622e-06	0.213377
424	2.01208e-05	2.4358e-06	1.62387e-06	0.0670693
425	0.000113055	1.36863e-05	9.12421e-06	0.37685
426	9.19884e-05	1.1136e-05	7.42401e-06	0.306628
427	6.05468e-05	7.32972e-06	4.88648e-06	0.201823
428	2.22578e-05	2.6945e-06	1.79633e-06	0.0741926
429	8.3338e-05	1.00888e-05	6.72587e-06	0.277793
430	3.11765e-05	3.77419e-06	2.51613e-06	0.103922
431	8.09736e-05	9.80257e-06	6.53505e-06	0.269912
432	5.21836e-05	6.31728e-06	4.21152e-06	0.173945
433	3.89045e-05	4.70974e-06	3.13983e-06	0.129682
434	8.55685e-05	1.03588e-05	6.90588e-06	0.285228
435	0.000218862	2.64952e-05	1.76635e-05	0.72954
436	3.3435e-05	4.0476e-06	2.6984e-06	0.11145
437	4.04954e-05	4.90232e-06	3.26822e-06	0.134985
438	5.89985e-05	7.14229e-06	4.76153e-06	0.196662
439	0.000158048	1.91331e-05	1.27554e-05	0.526828
440	7.36375e-05	8.91447e-06	5.94298e-06	0.245458
441	7.52144e-05	9.10537e-06	6.07025e-06	0.250715
442	0.000199395	2.41386e-05	1.60924e-05	0.664651
443	3.05497e-05	3.69832e-06	2.46554e-06	0.101832
444	4.30344e-05	5.2097e-06	3.47313e-06	0.143448
445	0.000100594	1.21778e-05	8.11851e-06	0.335313
446	8.81273e-05	1.06686e-05	7.11239e-06	0.293758
447	5.37042e-05	6.50137e-06	4.33425e-06	0.179014
448	8.31437e-05	1.00653e-05	6.71018e-06	0.277146
449	3.65074e-05	4.41955e-06	2.94636e-06	0.121691
450	3.19046e-05	3.86234e-06	2.57489e-06	0.106349
451	6.93064e-05	8.39015e-06	5.59343e-06	0.231021
452	3.08029e-05	3.72897e-06	2.48598e-06	0.102676
453	7.36602e-05	8.91722e-06	5.94481e-06	0.245534
454	7.3527e-05	8.9011e-06	5.93406e-06	0.24509
455	3.95783e-05	4.79131e-06	3.1942e-06	0.131928
456	9.74804e-05	1.18009e-05	7.86724e-06	0.324935
457	8.67195e-05	1.04982e-05	6.99877e-06	0.289065
458	6.28272e-05	7.60579e-06	5.07053e-06	0.209424
459	5.58818e-05	6.76498e-06	4.50999e-06	0.186273
460	4.46759e-05	5.40841e-06	3.60561e-06	0.14892
461	4.16589e-05	5.04318e-06	3.36212e-06	0.138863
462	0.000111116	1.34516e-05	8.96774e-06	0.370388
463	9.87824e-05	1.19585e-05	7.97232e-06	0.329275
464	4.2039e-05	5.08919e-06	3.39279e-06	0.14013
465	4.27051e-05	5.16982e-06	3.44655e-06	0.14235
466	0.000104063	1.25977e-05	8.39846e-06	0.346875
467	6.82658e-05	8.26418e-06	5.50945e-06	0.227553
468	4.7063e-05	5.69739e-06	3.79826e-06	0.156877
469	0.000121037	1.46526e-05	9.76839e-06	0.403456
470	5.30218e-05	6.41875e-06	4.27917e-06	0.176739
471	2.59459e-05	3.14098e-06	2.09399e-06	0.0864864
472	7.22031e-05	8.74082e-06	5.82722e-06	0.240677
473	6.37063e-05	7.71221e-06	5.14147e-06	0.212354
474	5.59839e-05	6.77735e-06	4.51823e-06	0.186613
475	0.000132615	1.60542e-05	1.07028e-05	0.442049
476	0.000114159	1.38199e-05	9.2133e-06	0.38053
477	5.94976e-05	7.20271e-06	4.80181e-06	0.198325
478	8.67125e-05	1.04973e-05	6.99821e-06	0.289042
479	4.09314e-05	4.95511e-06	3.30341e-06	0.136438
480	5.20896e-05	6.30591e-06	4.20394e-06	0.173632
481	2.72005e-05	3.29286e-06	2.19524e-06	0.0906683
482	7.49771e-05	9.07664e-06	6.05109e-06	0.249924
483	0.00011262	1.36336e-05	9.08906e-06	0.375399
484	7.33342e-05	8.87775e-06	5.9185e-06	0.244447
485	3.163e-05	3.82909e-06	2.55273e-06	0.105433
486	3.85489e-05	4.66669e-06	3.11113e-06	0.128496
487	0.00012221	1.47946e-05	9.86309e-06	0.407367
488	4.01454e-05	4.85995e-06	3.23997e-06	0.133818
489	6.05935e-05	7.33538e-06	4.89025e-06	0.201978
490	4.88444e-05	5.91305e-06	3.94203e-06	0.162815
491	3.93674e-05	4.76577e-06	3.17718e-06	0.131225
492	4.0515e-05	4.9047e-06	3.2698e-06	0.13505
493	6.73649e-05	8.15511e-06	5.43674e-06	0.22455
494	7.88849e-05	9.54971e-06	6.36648e-06	0.26295
495	4.06068e-05	4.91582e-06	3.27721e-06	0.135356
496	5.39752e-05	6.53418e-06	4.35612e-06	0.179917
497	5.005e-05	6.05899e-06	4.03933e-06	0.166833
498	7.43782e-05	9.00414e-06	6.00276e-06	0.247927
499	8.79106e-05	1.06424e-05	7.0949e-06	0.293035
500	4.83789e-05	5.8567e-06	3.90447e-06	0.161263
501	8.52644e-05	1.0322e-05	6.88134e-06	0.284215
502	6.72003e-05	8.13519e-06	5.42346e-06	0.224001
503	7.50854e-05	9.08975e-06	6.05983e-06	0.250285
504	5.22646e-05	6.32709e-06	4.21806e-06	0.174215
505	2.97658e-05	3.60341e-06	2.40227e-06	0.0992193
506	7.77514e-05	9.41249e-06	6.27499e-06	0.259171
507	7.90809e-05	9.57345e-06	6.3823e-06	0.263603
508	3.44815e-05	4.17428e-06	2.78286e-06	0.114938
509	3.55156e-05	4.29948e-06	2.86632e-06	0.118385
510	5.61814e-05	6.80125e-06	4.53417e-06	0.187271
511	9.60231e-05	1.16244e-05	7.74963e-06	0.320077
512	3.52338e-05	4.26536e-06	2.84358e-06	0.117446
513	3.95231e-05	4.78462e-06	3.18974e-06	0.131744
514	9.18558e-05	1.112e-05	7.4133e-06	0.306186
515	4.49661e-05	5.44354e-06	3.62903e-06	0.149887
516	5.19525e-05	6.28931e-06	4.19287e-06	0.173175
517	7.40069e-05	8.95919e-06	5.9728e-06	0.24669
518	4.73107e-05	5.72737e-06	3.81825e-06	0.157702
519	6.10993e-05	7.39661e-06	4.93107e-06	0.203664
520	2.86067e-05	3.4631e-06	2.30873e-06	0.0953557
521	4.80722e-05	5.81956e-06	3.87971e-06	0.160241
522	5.01405e-05	6.06995e-06	4.04663e-06	0.167135
523	0.000227265	2.75125e-05	1.83417e-05	0.757552
524	2.61825e-05	3.16962e-06	2.11308e-06	0.0872749
525	3.36796e-05	4.07722e-06	2.71815e-06	0.112265
526	6.23788e-05	7.5515e-06	5.03433e-06	0.207929
527	9.07866e-05	1.09905e-05	7.32701e-06	0.302622
528	0.000112305	1.35955e-05	9.0637e-06	0.374351
529	4.92124e-05	5.9576e-06	3.97173e-06	0.164041
530	2.7836e-05	3.3698e-06	2.24653e-06	0.0927867
531	4.0107e-05	4.85531e-06	3.23687e-06	0.13369
532	5.51026e-05	6.67066e-06	4.44711e-06	0.183675
533	4.16863e-05	5.0465e-06	3.36433e-06	0.138954
534	8.4474e-05	1.02263e-05	6.81754e-06	0.28158
535	7.45707e-05	9.02744e-06	6.01829e-06	0.248569
536	3.38189e-05	4.09407e-06	2.72938e-06	0.11273
537	6.31127e-05	7.64035e-06	5.09357e-06	0.210376
538	3.46192e-05	4.19097e-06	2.79398e-06	0.115397
539	2.6122e-05	3.1623e-06	2.1082e-06	0.0870734
540	3.2824e-05	3.97363e-06	2.64909e-06	0.109413
541	2.76361e-05	3.34559e-06	2.2304e-06	0.0921203
542	8.42443e-05	1.01985e-05	6.79901e-06	0.280814
543	2.88882e-05	3.49717e-06	2.33145e-06	0.0962939
544	4.08101e-05	4.94042e-06	3.29361e-06	0.136034
545	5.29072e-05	6.40489e-06	4.26992e-06	0.176357
546	7.72212e-05	9.34831e-06	6.23221e-06	0.257404
547	2.09864e-05	2.54059e-06	1.69373e-06	0.0699547
548	0.00011893	1.43975e-05	9.59834e-06	0.396433
549	8.6713e-05	1.04974e-05	6.99825e-06	0.289043
550	5.45622e-05	6.60523e-06	4.40349e-06	0.181874
551	6.94724e-05	8.41024e-06	5.60683e-06	0.231575
552	3.9064e-05	4.72904e-06	3.15269e-06	0.130213
553	5.40131e-05	6.53876e-06	4.35917e-06	0.180044
554	4.60095e-05	5.56986e-06	3.71324e-06	0.153365
555	8.7207e-05	1.05572e-05	7.03812e-06	0.29069
556	4.95423e-05	5.99753e-06	3.99835e-06	0.165141
557	2.66358e-05	3.22449e-06	2.14966e-06	0.0887858
558	8.85148e-05	1.07155e-05	7.14367e-06	0.295049
559	3.84827e-05	4.65867e-06	3.10578e-06	0.128276
560	5.70659e-05	6.90833e-06	4.60555e-06	0.19022
561	7.36658e-05	8.91789e-06	5.94526e-06	0.245553
562	6.99212e-05	8.46458e-06	5.64305e-06	0.233071
563	6.92582e-05	8.38431e-06	5.58954e-06	0.230861
564	0.000114331	1.38408e-05	9.22722e-06	0.381105
565	6.37474e-05	7.71719e-06	5.14479e-06	0.212491
566	3.07967e-05	3.72821e-06	2.48547e-06	0.102656
567	4.2086e-05	5.09488e-06	3.39659e-06	0.140287
568	6.68539e-05	8.09325e-06	5.3955e-06	0.222846
569	0.00017284	2.09238e-05	1.39492e-05	0.576133
570	4.29078e-05	5.19437e-06	3.46291e-06	0.143026
571	2.68758e-05	3.25355e-06	2.16903e-06	0.089586
572	5.62465e-05	6.80914e-06	4.53943e-06	0.187488
573	7.7666e-05	9.40215e-06	6.2681e-06	0.258887
574	4.30279e-05	5.2089e-06	3.4726e-06	0.143426
575	5.88894e-05	7.12908e-06	4.75272e-06	0.196298
576	4.55222e-05	5.51086e-06	3.67391e-06	0.151741
577	3.13934e-05	3.80044e-06	2.53363e-06	0.104645
578	7.24405e-05	8.76956e-06	5.84637e-06	0.241468
579	6.47335e-05	7.83656e-06	5.22437e-06	0.215778
580	5.58113e-05	6.75645e-06	4.5043e-06	0.186038
581	6.75474e-05	8.17721e-06	5.45147e-06	0.225158
582	7.27486e-05	8.80686e-06	5.87124e-06	0.242495
583	5.6298e-05	6.81537e-06	4.54358e-06	0.18766
584	6.41698e-05	7.76832e-06	5.17888e-06	0.213899
585	8.83822e-05	1.06994e-05	7.13296e-06	0.294607
586	0.000152331	1.8441e-05	1.2294e-05	0.507769
587	6.68201e-05	8.08916e-06	5.39277e-06	0.222734
588	0.000119047	1.44117e-05	9.60779e-06	0.396823
589	6.31613e-05	7.64624e-06	5.09749e-06	0.210538
590	9.28016e-05	1.12345e-05	7.48964e-06	0.309339
591	7.73784e-05	9.36734e-06	6.24489e-06	0.257928
592	7.20892e-05	8.72703e-06	5.81802e-06	0.240297
593	9.73507e-05	1.17852e-05	7.85677e-06	0.324502
594	7.81145e-05	9.45645e-06	6.3043e-06	0.260382
595	0.000100953	1.22212e-05	8.14749e-06	0.336509
596	0.000104568	1.26588e-05	8.43923e-06	0.348559
597	7.74418e-05	9.37502e-06	6.25001e-06	0.258139
598	4.12371e-05	4.99211e-06	3.32808e-06	0.137457
599	7.74234e-05	9.37278e-06	6.24852e-06	0.258078
600	4.76719e-05	5.7711e-06	3.8474e-06	0.158906
601	3.59054e-05	4.34666e-06	2.89777e-06	0.119685
602	4.40397e-05	5.3314e-06	3.55427e-06	0.146799
603	5.94844e-05	7.20111e-06	4.80074e-06	0.198281
604	6.83388e-05	8.27302e-06	5.51535e-06	0.227796
605	3.71509e-05	4.49744e-06	2.99829e-06	0.123836
606	3.68964e-05	4.46663e-06	2.97775e-06	0.122988
607	4.53189e-05	5.48626e-06	3.6575e-06	0.151063
608	8.21022e-05	9.93919e-06	6.62613e-06	0.273674
609	5.28883e-05	6.40259e-06	4.26839e-06	0.176294
610	8.13707e-05	9.85064e-06	6.56709e-06	0.271236
611	7.62419e-05	9.22976e-06	6.15317e-06	0.25414
612	6.55947e-05	7.94082e-06	5.29388e-06	0.218649
613	0.000118772	1.43784e-05	9.5856e-06	0.395907
614	2.11664e-05	2.56238e-06	1.70825e-06	0.0705546
615	4.91104e-05	5.94525e-06	3.9635e-06	0.163701
616	4.43968e-05	5.37462e-06	3.58308e-06	0.147989
617	0.000118823	1.43845e-05	9.58968e-06	0.396075
618	5.76246e-05	6.97597e-06	4.65065e-06	0.192082
619	6.7971e-05	8.22849e-06	5.48566e-06	0.22657
620	5.30448e-05	6.42154e-06	4.28103e-06	0.176816
621	9.05726e-05	1.09646e-05	7.30974e-06	0.301909
622	5.65542e-05	6.84639e-06	4.56426e-06	0.188514
623	4.90423e-05	5.937e-06	3.958e-06	0.163474
624	5.99936e-05	7.26275e-06	4.84184e-06	0.199979
625	8.96029e-05	1.08472e-05	7.23148e-06	0.298676
626	3.13033e-05	3.78954e-06	2.52636e-06	0.104344
627	7.01897e-05	8.49708e-06	5.66472e-06	0.233966
628	6.57392e-05	7.95831e-06	5.30554e-06	0.219131
629	3.98034e-05	4.81856e-06	3.21237e-06	0.132678
630	0.000126876	1.53595e-05	1.02397e-05	0.422921
631	6.83504e-05	8.27442e-06	5.51628e-06	0.227835
632	3.49645e-05	4.23277e-06	2.82184e-06	0.116548
633	5.67086e-05	6.86508e-06	4.57672e-06	0.189029
634	4.56092e-05	5.52139e-06	3.68093e-06	0.152031
635	2.23465e-05	2.70524e-06	1.80349e-06	0.0744882
636	3.4433e-05	4.16842e-06	2.77895e-06	0.114777
637	5.02394e-05	6.08192e-06	4.05461e-06	0.167465
638	6.62886e-05	8.02483e-06	5.34988e-06	0.220962
639	9.76295e-05	1.18189e-05	7.87928e-06	0.325432
640	7.12786e-05	8.6289e-06	5.7526e-06	0.237595
641	5.55422e-05	6.72388e-06	4.48258e-06	0.185141
642	0.000112781	1.36532e-05	9.10211e-06	0.375937
643	7.35093e-05	8.89895e-06	5.93263e-06	0.245031
644	3.64207e-05	4.40904e-06	2.93936e-06	0.121402
645	3.61656e-05	4.37817e-06	2.91878e-06	0.120552
646	7.16016e-05	8.66801e-06	5.77867e-06	0.238672
647	0.000129152	1.5635e-05	1.04233e-05	0.430507
648	7.03625e-05	8.518e-06	5.67867e-06	0.234542
649	5.277e-05	6.38827e-06	4.25885e-06	0.1759
650	3.96063e-05	4.7947e-06	3.19646e-06	0.132021
651	8.01826e-05	9.70682e-06	6.47121e-06	0.267275
652	0.000179597	2.17418e-05	1.44945e-05	0.598656
653	7.0908e-05	8.58404e-06	5.72269e-06	0.23636
654	3.08413e-05	3.73362e-06	2.48908e-06	0.102804
655	6.07062e-05	7.34902e-06	4.89934e-06	0.202354
656	4.4804e-05	5.42392e-06	3.61595e-06	0.149347
657	1.59212e-05	1.9274e-06	1.28493e-06	0.0530707
658	8.91107e-05	1.07876e-05	7.19176e-06	0.297036
659	0.000168516	2.04003e-05	1.36002e-05	0.561718
660	4.20902e-05	5.09539e-06	3.39692e-06	0.140301
661	7.14185e-05	8.64584e-06	5.7639e-06	0.238062
662	3.04882e-05	3.69087e-06	2.46058e-06	0.101627
663	0.000113856	1.37832e-05	9.18882e-06	0.379519
664	6.35464e-05	7.69285e-06	5.12857e-06	0.211821
665	4.82771e-05	5.84437e-06	3.89625e-06	0.160924
666	6.78713e-05	8.21642e-06	5.47762e-06	0.226238
667	8.3218e-05	1.00743e-05	6.71619e-06	0.277393
668	4.017e-05	4.86294e-06	3.24196e-06	0.1339
669	9.969e-05	1.20684e-05	8.04557e-06	0.3323
670	7.67808e-05	9.295e-06	6.19667e-06	0.255936
671	6.65667e-05	8.05848e-06	5.37232e-06	0.221889
672	4.66421e-05	5.64644e-06	3.7643e-06	0.155474
673	4.29181e-05	5.19562e-06	3.46375e-06	0.14306
674	6.57646e-05	7.96139e-06	5.30759e-06	0.219215
675	6.23243e-05	7.54491e-06	5.02994e-06	0.207748
676	0.000106914	1.29429e-05	8.6286e-06	0.356381
677	4.99551e-05	6.04751e-06	4.03167e-06	0.166517
678	5.45989e-05	6.60968e-06	4.40645e-06	0.181996
679	6.89547e-05	8.34758e-06	5.56505e-06	0.229849
680	5.14234e-05	6.22526e-06	4.15017e-06	0.171411
681	5.66863e-05	6.86238e-06	4.57492e-06	0.188954
682	4.82629e-05	5.84265e-06	3.8951e-06	0.160876
683	5.1845e-05	6.27629e-06	4.1842e-06	0.172817
684	3.6206e-05	4.38306e-06	2.92204e-06	0.120687
685	6.9652e-05	8.43198e-06	5.62132e-06	0.232173
686	5.99626e-05	7.259e-06	4.83934e-06	0.199875
687	7.89086e-05	9.55258e-06	6.36839e-06	0.263029
688	7.45131e-05	9.02047e-06	6.01364e-06	0.248377
689	2.63684e-05	3.19212e-06	2.12808e-06	0.0878945
690	4.96044e-05	6.00505e-06	4.00337e-06	0.165348
691	5.01743e-05	6.07404e-06	4.04936e-06	0.167248
692	8.32207e-05	1.00746e-05	6.7164e-06	0.277402
693	8.75081e-05	1.05936e-05	7.06242e-06	0.291694
694	6.04054e-05	7.31261e-06	4.87507e-06	0.201351
695	7.74923e-05	9.38113e-06	6.25409e-06	0.258308
696	3.09127e-05	3.74226e-06	2.49484e-06	0.103042
697	4.6504e-05	5.62971e-06	3.75314e-06	0.155013
698	0.0001035	1.25296e-05	8.35306e-06	0.345
699	0.000121545	1.4714e-05	9.80936e-06	0.405149
700	6.70284e-05	8.11438e-06	5.40959e-06	0.223428
701	6.6095e-05	8.00138e-06	5.33425e-06	0.220317
702	4.33863e-05	5.25229e-06	3.50153e-06	0.144621
703	9.95586e-05	1.20524e-05	8.03496e-06	0.331862
704	5.73766e-05	6.94594e-06	4.63063e-06	0.191255
705	0.000143916	1.74222e-05	1.16148e-05	0.479718
706	8.22436e-05	9.95631e-06	6.63754e-06	0.274145
707	5.269e-05	6.37859e-06	4.2524e-06	0.175633
708	7.72737e-05	9.35466e-06	6.23644e-06	0.257579
709	4.74281e-05	5.74158e-06	3.82772e-06	0.158094
710	8.57132e-05	1.03763e-05	6.91756e-06	0.285711
711	7.65785e-05	9.2705e-06	6.18034e-06	0.255262
712	2.68468e-05	3.25004e-06	2.16669e-06	0.0894893
713	0.000210351	2.54648e-05	1.69765e-05	0.701169
714	0.000232698	2.81701e-05	1.87801e-05	0.77566
715	3.77706e-05	4.57246e-06	3.04831e-06	0.125902
716	9.15581e-05	1.10839e-05	7.38928e-06	0.305194
717	0.000103335	1.25096e-05	8.33976e-06	0.344451
718	2.43201e-05	2.94417e-06	1.96278e-06	0.0810671
719	6.32096e-05	7.65209e-06	5.10139e-06	0.210699
720	0.000158518	1.91901e-05	1.27934e-05	0.528395
721	5.69376e-05	6.8928e-06	4.5952e-06	0.189792
722	5.38443e-05	6.51833e-06	4.34555e-06	0.179481
723	6.54762e-05	7.92647e-06	5.28431e-06	0.218254
724	3.21586e-05	3.89308e-06	2.59538e-06	0.107195
725	9.39437e-05	1.13727e-05	7.58181e-06	0.313146
726	8.64152e-05	1.04613e-05	6.97422e-06	0.288051
727	4.04608e-05	4.89814e-06	3.26543e-06	0.134869
728	1.75233e-05	2.12135e-06	1.41424e-06	0.0584111
729	8.44346e-05	1.02216e-05	6.81437e-06	0.281449
730	5.03729e-05	6.09808e-06	4.06539e-06	0.16791
731	6.39796e-05	7.74529e-06	5.16353e-06	0.213265
732	5.05149e-05	6.11527e-06	4.07685e-06	0.168383
733	3.5661e-05	4.31708e-06	2.87805e-06	0.11887
734	8.15503e-05	9.87238e-06	6.58159e-06	0.271834
735	7.52596e-05	9.11084e-06	6.07389e-06	0.250865
736	3.02959e-05	3.66758e-06	2.44506e-06	0.100986
737	2.52308e-05	3.05441e-06	2.03627e-06	0.0841025
738	5.41831e-05	6.55934e-06	4.37289e-06	0.18061
739	4.58943e-05	5.55591e-06	3.70394e-06	0.152981
740	4.47603e-05	5.41863e-06	3.61242e-06	0.149201
741	4.96221e-05	6.0072e-06	4.0048e-06	0.165407
742	7.75422e-05	9.38716e-06	6.25811e-06	0.258474
743	3.36909e-05	4.07859e-06	2.71906e-06	0.112303
744	0.000135975	1.6461e-05	1.0974e-05	0.453252
745	5.30741e-05	6.42509e-06	4.28339e-06	0.176914
746	3.77502e-05	4.57e-06	3.04666e-06	0.125834
747	3.37928e-05	4.09091e-06	2.72727e-06	0.112643
748	7.99975e-05	9.6844e-06	6.45627e-06	0.266658
749	0.000100754	1.21971e-05	8.13142e-06	0.335846
750	4.82312e-05	5.83881e-06	3.89254e-06	0.160771
751	5.1999e-05	6.29493e-06	4.19662e-06	0.17333
752	9.48031e-05	1.14767e-05	7.65116e-06	0.31601
753	8.91346e-05	1.07905e-05	7.19368e-06	0.297115
754	3.1698e-05	3.83732e-06	2.55821e-06	0.10566
755	7.55821e-05	9.14988e-06	6.09992e-06	0.25194
756	4.14232e-05	5.01464e-06	3.34309e-06	0.138077
757	0.000105168	1.27315e-05	8.48768e-06	0.35056
758	5.2729e-05	6.38331e-06	4.25554e-06	0.175763
759	3.23963e-05	3.92185e-06	2.61457e-06	0.107988
760	7.35332e-05	8.90184e-06	5.93456e-06	0.245111
761	4.66439e-05	5.64666e-06	3.76444e-06	0.15548
762	0.00010521	1.27365e-05	8.49103e-06	0.350699
763	7.13105e-05	8.63276e-06	5.75518e-06	0.237702
764	8.78672e-05	1.06371e-05	7.0914e-06	0.292891
765	4.44779e-05	5.38444e-06	3.58963e-06	0.14826
766	7.38657e-05	8.9421e-06	5.9614e-06	0.246219
767	3.00454e-05	3.63726e-06	2.42484e-06	0.100151
768	0.000103704	1.25543e-05	8.36951e-06	0.345679
769	8.75812e-05	1.06025e-05	7.06832e-06	0.291937
770	3.12644e-05	3.78483e-06	2.52322e-06	0.104215
771	3.41075e-05	4.12902e-06	2.75268e-06	0.113692
772	4.76136e-05	5.76404e-06	3.84269e-06	0.158712
773	2.73557e-05	3.31165e-06	2.20776e-06	0.0911856
774	6.62886e-05	8.02482e-06	5.34988e-06	0.220962
775	8.04968e-05	9.74484e-06	6.49656e-06	0.268323
776	5.06695e-05	6.13399e-06	4.08932e-06	0.168898
777	6.53421e-05	7.91023e-06	5.27349e-06	0.217807
778	5.71706e-05	6.921e-06	4.614e-06	0.190569
779	5.98109e-05	7.24064e-06	4.82709e-06	0.19937
780	6.16175e-05	7.45934e-06	4.97289e-06	0.205392
781	0.000175559	2.1253e-05	1.41686e-05	0.585196
782	5.16992e-05	6.25864e-06	4.17243e-06	0.172331
783	5.80517e-05	7.02766e-06	4.68511e-06	0.193506
784	0.000115618	1.39966e-05	9.33107e-06	0.385394
785	3.93738e-05	4.76654e-06	3.17769e-06	0.131246
786	4.85634e-05	5.87903e-06	3.91935e-06	0.161878
787	6.14993e-05	7.44503e-06	4.96336e-06	0.204998
788	2.65866e-05	3.21854e-06	2.14569e-06	0.0886219
789	3.39569e-05	4.11078e-06	2.74052e-06	0.11319
790	4.86953e-05	5.895e-06	3.93e-06	0.162318
791	2.85562e-05	3.45699e-06	2.30466e-06	0.0951875
792	3.92686e-05	4.75381e-06	3.16921e-06	0.130895
793	7.71041e-05	9.33413e-06	6.22275e-06	0.257014
794	6.17346e-05	7.47352e-06	4.98235e-06	0.205782
795	3.61374e-05	4.37475e-06	2.9165e-06	0.120458
796	4.87283e-05	5.89899e-06	3.93266e-06	0.162428
797	8.0978e-05	9.8031e-06	6.5354e-06	0.269927
798	1.63597e-05	1.98049e-06	1.32033e-06	0.0545324
799	4.0955e-05	4.95796e-06	3.30531e-06	0.136517
800	7.39557e-05	8.95298e-06	5.96866e-06	0.246519
801	3.78334e-05	4.58007e-06	3.05338e-06	0.126111
802	0.000114064	1.38085e-05	9.20567e-06	0.380215
803	5.89878e-05	7.14099e-06	4.76066e-06	0.196626
804	6.40414e-05	7.75278e-06	5.16852e-06	0.213471
805	8.83328e-05	1.06935e-05	7.12898e-06	0.294443
806	3.44807e-05	4.17419e-06	2.7828e-06	0.114936
807	4.91217e-05	5.94661e-06	3.96441e-06	0.163739
808	4.17547e-05	5.05478e-06	3.36985e-06	0.139182
809	6.81345e-05	8.24828e-06	5.49885e-06	0.227115
810	3.55397e-05	4.30239e-06	2.86826e-06	0.118466
811	6.56685e-05	7.94975e-06	5.29983e-06	0.218895
812	5.74576e-05	6.95575e-06	4.63716e-06	0.191525
813	3.46561e-05	4.19543e-06	2.79695e-06	0.11552
814	0.00010908	1.32051e-05	8.8034e-06	0.3636
815	6.37839e-05	7.7216e-06	5.14774e-06	0.212613
816	4.86752e-05	5.89257e-06	3.92838e-06	0.162251
817	9.03245e-05	1.09346e-05	7.28972e-06	0.301082
818	7.36716e-05	8.9186e-06	5.94573e-06	0.245572
819	5.59723e-05	6.77594e-06	4.51729e-06	0.186574
820	5.60791e-05	6.78887e-06	4.52592e-06	0.18693
821	0.000109162	1.32151e-05	8.81004e-06	0.363874
822	5.99869e-05	7.26195e-06	4.8413e-06	0.199956
823	2.30512e-05	2.79055e-06	1.86037e-06	0.0768373
824	4.11315e-05	4.97933e-06	3.31956e-06	0.137105
825	5.94664e-05	7.19893e-06	4.79929e-06	0.198221
826	4.88648e-05	5.91552e-06	3.94368e-06	0.162883
827	4.66829e-05	5.65137e-06	3.76758e-06	0.15561
828	9.2644e-05	1.12154e-05	7.47691e-06	0.308813
829	0.000112857	1.36623e-05	9.1082e-06	0.376189
830	2.82668e-05	3.42195e-06	2.2813e-06	0.0942228
831	7.5016e-05	9.08135e-06	6.05423e-06	0.250053
832	8.94539e-05	1.08292e-05	7.21945e-06	0.29818
833	4.94678e-05	5.98852e-06	3.99234e-06	0.164893
834	2.22672e-05	2.69564e-06	1.7971e-06	0.0742241
835	4.1631e-05	5.03981e-06	3.35987e-06	0.13877
836	5.06779e-05	6.135e-06	4.09e-06	0.168926
837	8.24785e-05	9.98475e-06	6.6565e-06	0.274928
838	0.000120657	1.46066e-05	9.73775e-06	0.402191
839	3.56912e-05	4.32074e-06	2.88049e-06	0.118971
840	8.04197e-05	9.73551e-06	6.49034e-06	0.268066
841	6.27404e-05	7.59528e-06	5.06352e-06	0.209135
842	7.15456e-05	8.66122e-06	5.77415e-06	0.238485
843	4.97716e-05	6.0253e-06	4.01686e-06	0.165905
844	9.6412e-05	1.16715e-05	7.78102e-06	0.321373
845	3.83906e-05	4.64752e-06	3.09835e-06	0.127969
846	4.95212e-05	5.99498e-06	3.99665e-06	0.165071
847	3.36203e-05	4.07004e-06	2.71336e-06	0.112068
848	6.17701e-05	7.47781e-06	4.98521e-06	0.2059
849	6.36038e-05	7.6998e-06	5.1332e-06	0.212013
850	6.48428e-05	7.84979e-06	5.2332e-06	0.216143
851	5.59719e-05	6.77589e-06	4.51726e-06	0.186573
852	7.34255e-05	8.88881e-06	5.92587e-06	0.244752
853	0.000113627	1.37556e-05	9.1704e-06	0.378758
854	5.10656e-05	6.18194e-06	4.1213e-06	0.170219
855	4.08111e-05	4.94054e-06	3.2937e-06	0.136037
856	0.000100639	1.21833e-05	8.12219e-06	0.335465
857	0.000202745	2.45441e-05	1.63627e-05	0.675817
858	4.40192e-05	5.32891e-06	3.55261e-06	0.146731
859	6.15352e-05	7.44938e-06	4.96625e-06	0.205117
860	3.97574e-05	4.81299e-06	3.20866e-06	0.132525
861	7.4249e-05	8.9885e-06	5.99233e-06	0.247497
862	2.84653e-05	3.44598e-06	2.29732e-06	0.0948843
863	5.26685e-05	6.37599e-06	4.25066e-06	0.175562
864	0.000136593	1.65358e-05	1.10238e-05	0.455309
865	3.69812e-05	4.4769e-06	2.9846e-06	0.123271
866	0.000119616	1.44806e-05	9.65372e-06	0.39872
867	0.000103294	1.25047e-05	8.33647e-06	0.344315
868	4.43298e-05	5.36652e-06	3.57768e-06	0.147766
869	8.06202e-05	9.75979e-06	6.50652e-06	0.268734
870	7.73577e-05	9.36483e-06	6.24322e-06	0.257859
871	8.82222e-05	1.06801e-05	7.12005e-06	0.294074
872	3.37995e-05	4.09173e-06	2.72782e-06	0.112665
873	3.97489e-05	4.81195e-06	3.20797e-06	0.132496
874	3.33722e-05	4.04e-06	2.69333e-06	0.111241
875	6.79302e-05	8.22355e-06	5.48236e-06	0.226434
876	6.62437e-05	8.01938e-06	5.34625e-06	0.220812
877	7.06685e-05	8.55505e-06	5.70337e-06	0.235562
878	7.35543e-05	8.9044e-06	5.93626e-06	0.245181
879	4.6818e-05	5.66774e-06	3.77849e-06	0.15606
880	3.57638e-05	4.32953e-06	2.88635e-06	0.119213
881	6.92614e-05	8.38471e-06	5.5898e-06	0.230871
882	3.89292e-05	4.71272e-06	3.14182e-06	0.129764
883	5.9563e-05	7.21062e-06	4.80708e-06	0.198543
884	0.000145755	1.76449e-05	1.17633e-05	0.485849
885	0.000125457	1.51877e-05	1.01251e-05	0.418189
886	4.76484e-05	5.76826e-06	3.84551e-06	0.158828
887	5.18776e-05	6.28024e-06	4.18683e-06	0.172925
888	3.35951e-05	4.06699e-06	2.71133e-06	0.111984
889	3.26425e-05	3.95166e-06	2.63444e-06	0.108808
890	6.4312e-05	7.78554e-06	5.19036e-06	0.214373
891	3.57776e-05	4.33119e-06	2.88746e-06	0.119259
892	6.01258e-05	7.27876e-06	4.85251e-06	0.200419
893	2.63046e-05	3.1844e-06	2.12294e-06	0.087682
894	7.35667e-05	8.90589e-06	5.93726e-06	0.245222
895	9.33539e-05	1.13013e-05	7.53421e-06	0.31118
896	5.83198e-05	7.06013e-06	4.70675e-06	0.194399
897	7.99579e-05	9.67961e-06	6.45308e-06	0.266526
898	4.87436e-05	5.90085e-06	3.9339e-06	0.162479
899	2.90884e-05	3.52141e-06	2.34761e-06	0.0969614
900	7.1554e-05	8.66225e-06	5.77483e-06	0.238513
901	8.42575e-05	1.02001e-05	6.80008e-06	0.280858
902	4.56988e-05	5.53224e-06	3.68816e-06	0.152329
903	8.93041e-05	1.08111e-05	7.20737e-06	0.29768
904	7.46181e-05	9.03318e-06	6.02212e-06	0.248727
905	4.7402e-05	5.73843e-06	3.82562e-06	0.158007
906	6.84434e-05	8.28568e-06	5.52379e-06	0.228145
907	4.72105e-05	5.71525e-06	3.81017e-06	0.157368
908	2.2768e-05	2.75627e-06	1.83751e-06	0.0758935
909	7.28013e-05	8.81323e-06	5.87549e-06	0.242671
910	4.47006e-05	5.4114e-06	3.6076e-06	0.149002
911	7.09814e-05	8.59293e-06	5.72862e-06	0.236605
912	0.000114482	1.38591e-05	9.23941e-06	0.381608
913	3.57048e-05	4.32238e-06	2.88158e-06	0.119016
914	5.31707e-05	6.43679e-06	4.29119e-06	0.177236
915	6.99898e-05	8.47288e-06	5.64859e-06	0.233299
916	0.000125121	1.5147e-05	1.0098e-05	0.41707
917	5.2817e-05	6.39396e-06	4.26264e-06	0.176057
918	0.000175383	2.12317e-05	1.41545e-05	0.584612
919	5.4493e-05	6.59686e-06	4.39791e-06	0.181643
920	6.43166e-05	7.78609e-06	5.19073e-06	0.214389
921	7.03875e-05	8.52103e-06	5.68068e-06	0.234625
922	5.20883e-05	6.30575e-06	4.20383e-06	0.173628
923	8.13917e-05	9.85318e-06	6.56879e-06	0.271306
924	5.61995e-05	6.80345e-06	4.53563e-06	0.187332
925	2.94438e-05	3.56443e-06	2.37629e-06	0.098146
926	5.98515e-05	7.24555e-06	4.83037e-06	0.199505
927	4.99783e-05	6.05032e-06	4.03354e-06	0.166594
928	6.24642e-05	7.56185e-06	5.04123e-06	0.208214
929	0.000102636	1.2425e-05	8.28336e-06	0.342121
930	4.71363e-05	5.70626e-06	3.80417e-06	0.157121
931	8.16059e-05	9.87911e-06	6.58607e-06	0.27202
932	9.90835e-05	1.19949e-05	7.99662e-06	0.330278
933	3.38082e-05	4.09278e-06	2.72852e-06	0.112694
934	4.29105e-05	5.1947e-06	3.46313e-06	0.143035
935	6.24426e-05	7.55923e-06	5.03949e-06	0.208142
936	7.25421e-05	8.78187e-06	5.85458e-06	0.241807
937	0.000124263	1.50431e-05	1.00288e-05	0.41421
938	6.79125e-05	8.22141e-06	5.48094e-06	0.226375
939	4.15868e-05	5.03446e-06	3.3563e-06	0.138623
940	6.20797e-05	7.51529e-06	5.01019e-06	0.206932
941	4.71099e-05	5.70307e-06	3.80205e-06	0.157033
942	7.30862e-05	8.84773e-06	5.89849e-06	0.243621
943	5.30718e-05	6.42481e-06	4.2832e-06	0.176906
944	0.000140982	1.70672e-05	1.13781e-05	0.469941
945	9.94316e-05	1.20371e-05	8.02471e-06	0.331439
946	7.73492e-05	9.36381e-06	6.24254e-06	0.257831
947	9.9538e-05	1.20499e-05	8.0333e-06	0.331793
948	0.000115538	1.39869e-05	9.32461e-06	0.385127
949	1.77413e-05	2.14774e-06	1.43183e-06	0.0591376
950	9.88603e-05	1.19679e-05	7.97861e-06	0.329534
951	9.33515e-05	1.1301e-05	7.53402e-06	0.311172
952	6.97852e-05	8.44812e-06	5.63208e-06	0.232617
953	3.72482e-05	4.50923e-06	3.00615e-06	0.124161
954	3.79716e-05	4.59679e-06	3.06453e-06	0.126572
955	6.24826e-05	7.56407e-06	5.04271e-06	0.208275
956	0.000111003	1.34379e-05	8.95858e-06	0.37001
957	5.41736e-05	6.5582e-06	4.37213e-06	0.180579
958	6.01234e-05	7.27847e-06	4.85231e-06	0.200411
959	5.14631e-05	6.23006e-06	4.15337e-06	0.171544
960	0.000182381	2.20788e-05	1.47192e-05	0.607936
961	1.92279e-05	2.3277e-06	1.5518e-06	0.0640929
962	6.14203e-05	7.43547e-06	4.95698e-06	0.204734
963	5.83623e-05	7.06527e-06	4.71018e-06	0.194541
964	8.85577e-05	1.07207e-05	7.14713e-06	0.295192
965	0.000104581	1.26605e-05	8.4403e-06	0.348603
966	2.56403e-05	3.10398e-06	2.06932e-06	0.0854675
967	2.325e-05	2.81462e-06	1.87642e-06	0.0775002
968	0.000125053	1.51388e-05	1.00925e-05	0.416843
969	4.60666e-05	5.57677e-06	3.71785e-06	0.153555
970	4.60056e-05	5.56938e-06	3.71292e-06	0.153352
971	2.93203e-05	3.54948e-06	2.36632e-06	0.0977344
972	0.000221015	2.67558e-05	1.78372e-05	0.736716
973	3.47045e-05	4.20129e-06	2.80086e-06	0.115682
974	0.000109043	1.32006e-05	8.80037e-06	0.363475
975	0.000143455	1.73665e-05	1.15777e-05	0.478184
976	6.60357e-05	7.9942e-06	5.32947e-06	0.220119
977	6.1762e-05	7.47684e-06	4.98456e-06	0.205873
978	4.38105e-05	5.30365e-06	3.53577e-06	0.146035
979	9.02234e-05	1.09223e-05	7.28156e-06	0.300745
980	9.86858e-05	1.19468e-05	7.96452e-06	0.328953
981	6.5379e-05	7.91471e-06	5.27647e-06	0.21793
982	6.46502e-05	7.82648e-06	5.21765e-06	0.215501
983	3.87716e-05	4.69365e-06	3.1291e-06	0.129239
984	5.902e-05	7.1449e-06	4.76326e-06	0.196733
985	6.35611e-05	7.69463e-06	5.12976e-06	0.21187
986	3.29374e-05	3.98736e-06	2.65824e-06	0.109791
987	0.000112652	1.36375e-05	9.09167e-06	0.375506
988	4.64639e-05	5.62486e-06	3.74991e-06	0.15488
989	6.17627e-05	7.47692e-06	4.98461e-06	0.205876
990	7.7837e-05	9.42286e-06	6.2819e-06	0.259457
991	5.65789e-05	6.84938e-06	4.56625e-06	0.188596
992	5.31847e-05	6.43848e-06	4.29232e-06	0.177282
993	0.000124437	1.50642e-05	1.00428e-05	0.41479
994	0.000142259	1.72217e-05	1.14811e-05	0.474195
995	4.99635e-05	6.04852e-06	4.03235e-06	0.166545
996	3.54282e-05	4.28889e-06	2.85926e-06	0.118094
997	3.07434e-05	3.72175e-06	2.48117e-06	0.102478
998	5.50411e-05	6.66321e-06	4.44214e-06	0.18347
999	8.88161e-05	1.0752e-05	7.16798e-06	0.296054
1000	9.00282e-05	1.08987e-05	7.26581e-06	0.300094
1001	5.56062e-05	6.73162e-06	4.48775e-06	0.185354
1002	7.90509e-05	9.56981e-06	6.37987e-06	0.263503
1003	0.000117869	1.42691e-05	9.51275e-06	0.392898
1004	6.949e-05	8.41238e-06	5.60825e-06	0.231633
1005	8.30586e-05	1.0055e-05	6.70332e-06	0.276862
1006	0.000108049	1.30803e-05	8.72023e-06	0.360165
1007	3.73673e-05	4.52364e-06	3.01576e-06	0.124558
1008	6.9515e-05	8.4154e-06	5.61027e-06	0.231717
1009	7.18804e-05	8.70175e-06	5.80117e-06	0.239601
1010	0.00023545	2.85034e-05	1.90022e-05	0.784835
1011	2.21998e-05	2.68748e-06	1.79165e-06	0.0739994
1012	6.88001e-05	8.32886e-06	5.55257e-06	0.229334
1013	8.00926e-05	9.69591e-06	6.46394e-06	0.266975
1014	5.995e-05	7.25747e-06	4.83831e-06	0.199833
1015	3.29432e-05	3.98806e-06	2.65871e-06	0.109811
1016	6.30424e-05	7.63184e-06	5.0879e-06	0.210141
1017	5.05853e-05	6.1238e-06	4.08253e-06	0.168618
1018	5.86539e-05	7.10057e-06	4.73372e-06	0.195513
1019	0.000265497	3.21408e-05	2.14272e-05	0.884991
1020	5.76902e-05	6.9839e-06	4.65594e-06	0.192301
1021	3.70429e-05	4.48437e-06	2.98958e-06	0.123476
1022	6.64459e-05	8.04386e-06	5.36258e-06	0.221486
1023	7.81751e-05	9.46379e-06	6.30919e-06	0.260584
1024	3.51018e-05	4.24939e-06	2.83293e-06	0.117006
1025	0.000100852	1.2209e-05	8.13935e-06	0.336173
1026	4.40574e-05	5.33353e-06	3.55569e-06	0.146858
1027	3.59488e-05	4.35192e-06	2.90128e-06	0.119829
1028	4.53895e-05	5.4948e-06	3.6632e-06	0.151298
1029	3.10171e-05	3.75489e-06	2.50326e-06	0.10339
1030	4.81019e-05	5.82315e-06	3.8821e-06	0.16034
1031	3.84566e-05	4.65551e-06	3.10367e-06	0.128189
1032	0.000187686	2.27211e-05	1.51474e-05	0.625621
1033	9.18589e-05	1.11203e-05	7.41356e-06	0.306196
1034	4.11385e-05	4.98018e-06	3.32012e-06	0.137128
1035	9.3818e-05	1.13575e-05	7.57167e-06	0.312727
1036	0.000152455	1.8456e-05	1.2304e-05	0.508183
1037	3.73187e-05	4.51775e-06	3.01184e-06	0.124396
1038	8.4647e-05	1.02473e-05	6.83151e-06	0.282157
1039	0.000102449	1.24024e-05	8.26827e-06	0.341498
1040	4.11093e-05	4.97664e-06	3.31776e-06	0.137031
1041	6.72431e-05	8.14037e-06	5.42692e-06	0.224144
1042	0.000135037	1.63475e-05	1.08983e-05	0.450124
1043	5.45297e-05	6.6013e-06	4.40087e-06	0.181766
1044	7.02287e-05	8.5018e-06	5.66787e-06	0.234096
1045	3.86524e-05	4.67922e-06	3.11948e-06	0.128841
1046	8.15685e-05	9.87458e-06	6.58306e-06	0.271895
1047	4.91498e-05	5.95002e-06	3.96668e-06	0.163833
1048	0.000136766	1.65567e-05	1.10378e-05	0.455886
1049	6.21028e-05	7.51809e-06	5.01206e-06	0.207009
1050	8.64326e-05	1.04634e-05	6.97562e-06	0.288109
1051	8.15142e-05	9.86801e-06	6.57868e-06	0.271714
1052	5.21995e-05	6.3192e-06	4.2128e-06	0.173998
1053	7.0742e-05	8.56395e-06	5.7093e-06	0.235807
1054	4.0073e-05	4.85119e-06	3.23413e-06	0.133577
1055	0.000118725	1.43727e-05	9.5818e-06	0.39575
1056	2.8262e-05	3.42137e-06	2.28091e-06	0.0942067
1057	6.70778e-05	8.12036e-06	5.41358e-06	0.223593
1058	6.84346e-05	8.28461e-06	5.52308e-06	0.228115
1059	7.19401e-05	8.70898e-06	5.80599e-06	0.2398
1060	7.19338e-05	8.70822e-06	5.80548e-06	0.239779
1061	9.35413e-05	1.1324e-05	7.54933e-06	0.311804
1062	7.01533e-05	8.49268e-06	5.66179e-06	0.233844
1063	4.34396e-05	5.25875e-06	3.50583e-06	0.144799
1064	5.35425e-05	6.48179e-06	4.32119e-06	0.178475
1065	5.35631e-05	6.48428e-06	4.32285e-06	0.178544
1066	3.96465e-05	4.79955e-06	3.1997e-06	0.132155
1067	5.37276e-05	6.5042e-06	4.33614e-06	0.179092
1068	5.24009e-05	6.34359e-06	4.22906e-06	0.17467
1069	0.000186163	2.25366e-05	1.50244e-05	0.620542
1070	5.30319e-05	6.41998e-06	4.27999e-06	0.176773
1071	0.000121055	1.46548e-05	9.76987e-06	0.403517
1072	3.08195e-05	3.73097e-06	2.48732e-06	0.102732
1073	6.52028e-05	7.89337e-06	5.26225e-06	0.217343
1074	7.43319e-05	8.99853e-06	5.99902e-06	0.247773
1075	8.80356e-05	1.06575e-05	7.10499e-06	0.293452
1076	5.97213e-05	7.22979e-06	4.81986e-06	0.199071
1077	9.5997e-05	1.16213e-05	7.74752e-06	0.31999
1078	4.12942e-05	4.99902e-06	3.33268e-06	0.137647
1079	5.78465e-05	7.00283e-06	4.66856e-06	0.192822
1080	6.30505e-05	7.63282e-06	5.08855e-06	0.210168
1081	3.81229e-05	4.61511e-06	3.07674e-06	0.127076
1082	5.67185e-05	6.86627e-06	4.57752e-06	0.189062
1083	0.000148669	1.79977e-05	1.19985e-05	0.495563
1084	3.12549e-05	3.78368e-06	2.52245e-06	0.104183
1085	4.64668e-05	5.62521e-06	3.75014e-06	0.154889
1086	3.41353e-05	4.13237e-06	2.75492e-06	0.113784
1087	6.74202e-05	8.16181e-06	5.44121e-06	0.224734
1088	4.6148e-05	5.58663e-06	3.72442e-06	0.153827
1089	1.3727e-05	1.66178e-06	1.10785e-06	0.0457568
1090	0.000187771	2.27313e-05	1.51542e-05	0.625903
1091	6.71324e-05	8.12697e-06	5.41798e-06	0.223775
1092	5.63825e-05	6.8256e-06	4.5504e-06	0.187942
1093	9.01465e-05	1.0913e-05	7.27536e-06	0.300488
1094	7.3487e-05	8.89625e-06	5.93083e-06	0.244957
1095	0.000101265	1.22591e-05	8.17271e-06	0.337551
1096	5.023e-05	6.08078e-06	4.05386e-06	0.167433
1097	0.000113836	1.37808e-05	9.1872e-06	0.379452
1098	2.81381e-05	3.40636e-06	2.27091e-06	0.0937936
1099	7.8287e-05	9.47734e-06	6.31823e-06	0.260957
1100	5.01113e-05	6.06641e-06	4.04427e-06	0.167038
1101	3.4803e-05	4.21321e-06	2.8088e-06	0.11601
1102	5.02991e-05	6.08915e-06	4.05943e-06	0.167664
1103	4.5616e-05	5.52222e-06	3.68148e-06	0.152053
1104	7.92098e-05	9.58904e-06	6.39269e-06	0.264033
1105	0.000112261	1.35901e-05	9.06009e-06	0.374202
1106	0.000105002	1.27114e-05	8.47427e-06	0.350006
1107	6.14846e-05	7.44325e-06	4.96217e-06	0.204949
1108	6.17326e-05	7.47328e-06	4.98219e-06	0.205775
1109	0.000102453	1.24028e-05	8.26854e-06	0.341509
1110	6.18674e-05	7.48959e-06	4.99306e-06	0.206225
1111	3.70135e-05	4.48081e-06	2.98721e-06	0.123378
1112	4.93048e-05	5.96878e-06	3.97919e-06	0.164349
1113	6.06078e-05	7.33711e-06	4.89141e-06	0.202026
1114	9.91315e-05	1.20007e-05	8.0005e-06	0.330438
1115	0.000135849	1.64457e-05	1.09638e-05	0.45283
1116	9.98121e-05	1.20831e-05	8.05543e-06	0.332707
1117	7.79461e-05	9.43606e-06	6.29071e-06	0.25982
1118	4.07948e-05	4.93857e-06	3.29238e-06	0.135983
1119	4.21693e-05	5.10497e-06	3.40331e-06	0.140564
1120	9.08622e-05	1.09997e-05	7.33312e-06	0.302874
1121	0.000129583	1.56871e-05	1.04581e-05	0.431942
1122	9.45939e-05	1.14514e-05	7.63428e-06	0.315313
1123	0.000103497	1.25292e-05	8.3528e-06	0.344989
1124	6.43591e-05	7.79123e-06	5.19415e-06	0.21453
1125	3.38351e-05	4.09604e-06	2.73069e-06	0.112784
1126	8.83544e-05	1.06961e-05	7.13072e-06	0.294515
1127	4.7223e-05	5.71676e-06	3.81117e-06	0.15741
1128	6.25e-05	7.56617e-06	5.04411e-06	0.208333
1129	0.000225745	2.73284e-05	1.82189e-05	0.752483
1130	0.000128474	1.55529e-05	1.03686e-05	0.428247
1131	3.65014e-05	4.41882e-06	2.94588e-06	0.121671
1132	4.61923e-05	5.59199e-06	3.72799e-06	0.153974
1133	2.56832e-05	3.10917e-06	2.07278e-06	0.0856105
1134	0.000115805	1.40192e-05	9.34611e-06	0.386015
1135	0.00011926	1.44375e-05	9.62502e-06	0.397535
1136	9.09458e-05	1.10098e-05	7.33986e-06	0.303153
1137	4.57898e-05	5.54326e-06	3.69551e-06	0.152633
1138	4.83322e-05	5.85104e-06	3.90069e-06	0.161107
1139	0.00010577	1.28043e-05	8.53623e-06	0.352565
1140	4.25444e-05	5.15037e-06	3.43358e-06	0.141815
1141	5.69852e-05	6.89856e-06	4.59904e-06	0.189951
1142	9.14449e-05	1.10702e-05	7.38014e-06	0.304816
1143	4.29608e-05	5.20078e-06	3.46719e-06	0.143203
1144	3.85076e-05	4.66169e-06	3.10779e-06	0.128359
1145	5.22955e-05	6.33084e-06	4.22056e-06	0.174318
1146	2.18481e-05	2.6449e-06	1.76327e-06	0.0728269
1147	6.5418e-05	7.91943e-06	5.27962e-06	0.21806
1148	3.68827e-05	4.46498e-06	2.97665e-06	0.122942
1149	7.37897e-05	8.9329e-06	5.95527e-06	0.245966
1150	8.87567e-05	1.07448e-05	7.16318e-06	0.295856
1151	0.000114879	1.39072e-05	9.27144e-06	0.382931
1152	2.95143e-05	3.57297e-06	2.38198e-06	0.0983811
1153	4.11609e-05	4.98289e-06	3.32193e-06	0.137203
1154	4.11846e-05	4.98576e-06	3.32384e-06	0.137282
1155	3.92381e-05	4.75011e-06	3.16674e-06	0.130794
1156	6.80229e-05	8.23477e-06	5.48985e-06	0.226743
1157	7.40628e-05	8.96595e-06	5.9773e-06	0.246876
1158	4.31215e-05	5.22024e-06	3.48016e-06	0.143738
1159	0.000110323	1.33556e-05	8.90375e-06	0.367745
1160	7.23629e-05	8.76017e-06	5.84011e-06	0.24121
1161	0.000102173	1.23689e-05	8.24595e-06	0.340576
1162	8.40529e-05	1.01753e-05	6.78356e-06	0.280176
1163	0.000156839	1.89868e-05	1.26578e-05	0.522797
1164	5.70609e-05	6.90772e-06	4.60515e-06	0.190203
1165	2.49528e-05	3.02076e-06	2.01384e-06	0.083176
1166	9.08117e-05	1.09936e-05	7.32904e-06	0.302706
1167	7.16614e-05	8.67525e-06	5.7835e-06	0.238871
1168	0.000107102	1.29656e-05	8.64374e-06	0.357006
1169	4.80522e-05	5.81714e-06	3.8781e-06	0.160174
1170	6.60757e-05	7.99904e-06	5.3327e-06	0.220252
1171	0.000101873	1.23326e-05	8.22174e-06	0.339576
1172	8.06777e-05	9.76675e-06	6.51117e-06	0.268926
1173	6.78001e-05	8.2078e-06	5.47187e-06	0.226
1174	5.29222e-05	6.4067e-06	4.27113e-06	0.176407
1175	4.56386e-05	5.52495e-06	3.6833e-06	0.152129
1176	3.93178e-05	4.75976e-06	3.17317e-06	0.131059
1177	6.54986e-05	7.92919e-06	5.28613e-06	0.218329
1178	7.54116e-05	9.12923e-06	6.08616e-06	0.251372
1179	9.30969e-05	1.12702e-05	7.51347e-06	0.310323
1180	0.000101159	1.22462e-05	8.1641e-06	0.337196
1181	7.5066e-05	9.0874e-06	6.05827e-06	0.25022
1182	6.31856e-05	7.64918e-06	5.09945e-06	0.210619
1183	3.62182e-05	4.38454e-06	2.92302e-06	0.120727
1184	4.14338e-05	5.01593e-06	3.34395e-06	0.138113
1185	0.000100453	1.21607e-05	8.10716e-06	0.334844
1186	2.39738e-05	2.90224e-06	1.93482e-06	0.0799125
1187	0.000116625	1.41185e-05	9.41232e-06	0.38875
1188	7.73626e-05	9.36543e-06	6.24362e-06	0.257875
1189	8.90179e-05	1.07764e-05	7.18426e-06	0.296726
1190	7.14019e-05	8.64382e-06	5.76255e-06	0.238006
1191	0.000107961	1.30696e-05	8.71307e-06	0.359869
1192	9.20194e-05	1.11398e-05	7.42651e-06	0.306731
1193	4.82159e-05	5.83696e-06	3.89131e-06	0.16072
1194	6.619e-05	8.01288e-06	5.34192e-06	0.220633
1195	0.000102338	1.2389e-05	8.25931e-06	0.341128
1196	9.36898e-05	1.1342e-05	7.56132e-06	0.312299
1197	5.2622e-05	6.37036e-06	4.24691e-06	0.175407
1198	3.74986e-05	4.53953e-06	3.02635e-06	0.124995
1199	8.71196e-05	1.05466e-05	7.03106e-06	0.290399
1200	5.97027e-05	7.22753e-06	4.81836e-06	0.199009
1201	9.44889e-05	1.14387e-05	7.62581e-06	0.314963
1202	4.97964e-05	6.02829e-06	4.01886e-06	0.165988
1203	3.65333e-05	4.42267e-06	2.94845e-06	0.121778
1204	4.6718e-05	5.65562e-06	3.77042e-06	0.155727
1205	3.67511e-05	4.44904e-06	2.96603e-06	0.122504
1206	4.53588e-05	5.49108e-06	3.66072e-06	0.151196
1207	0.000105206	1.27361e-05	8.49074e-06	0.350687
1208	5.44489e-05	6.59152e-06	4.39435e-06	0.181496
1209	0.000284713	3.4467e-05	2.2978e-05	0.949044
1210	2.88653e-05	3.4944e-06	2.3296e-06	0.0962177
1211	8.62465e-05	1.04409e-05	6.9606e-06	0.287488
1212	0.000150855	1.82623e-05	1.21749e-05	0.502849
1213	4.98372e-05	6.03323e-06	4.02215e-06	0.166124
1214	4.86834e-05	5.89355e-06	3.92903e-06	0.162278
1215	4.30995e-05	5.21757e-06	3.47838e-06	0.143665
1216	7.18917e-05	8.70312e-06	5.80208e-06	0.239639
1217	2.62827e-05	3.18175e-06	2.12117e-06	0.0876089
1218	5.36565e-05	6.49559e-06	4.33039e-06	0.178855
1219	5.90534e-05	7.14894e-06	4.76596e-06	0.196845
1220	8.39267e-05	1.01601e-05	6.77338e-06	0.279756
1221	9.66877e-05	1.17049e-05	7.80326e-06	0.322292
1222	0.000135157	1.63619e-05	1.09079e-05	0.450522
1223	6.74897e-05	8.17022e-06	5.44681e-06	0.224966
1224	6.54153e-05	7.9191e-06	5.2794e-06	0.218051
1225	0.000109752	1.32865e-05	8.85767e-06	0.365841
1226	6.24506e-05	7.5602e-06	5.04013e-06	0.208169
1227	7.4586e-05	9.02929e-06	6.01953e-06	0.24862
1228	4.91385e-05	5.94865e-06	3.96576e-06	0.163795
1229	3.52653e-05	4.26917e-06	2.84612e-06	0.117551
1230	6.8994e-05	8.35233e-06	5.56822e-06	0.22998
1231	5.16822e-05	6.25659e-06	4.17106e-06	0.172274
1232	5.44305e-05	6.58929e-06	4.39286e-06	0.181435
1233	5.18699e-05	6.27931e-06	4.18621e-06	0.1729
1234	4.54291e-05	5.4996e-06	3.6664e-06	0.15143
1235	7.35035e-05	8.89825e-06	5.93217e-06	0.245012
1236	4.0786e-05	4.9375e-06	3.29167e-06	0.135953
1237	0.00010615	1.28504e-05	8.56693e-06	0.353833
1238	3.25439e-05	3.93973e-06	2.62649e-06	0.10848
1239	6.03906e-05	7.31081e-06	4.87387e-06	0.201302
1240	2.95788e-05	3.58077e-06	2.38718e-06	0.0985959
1241	8.78676e-05	1.06371e-05	7.09143e-06	0.292892
1242	6.18777e-05	7.49085e-06	4.9939e-06	0.206259
1243	9.60777e-05	1.16311e-05	7.75403e-06	0.320259
1244	9.28522e-05	1.12406e-05	7.49372e-06	0.309507
1245	9.69857e-05	1.1741e-05	7.82731e-06	0.323286
1246	5.52479e-05	6.68824e-06	4.45883e-06	0.18416
1247	1.96036e-05	2.37319e-06	1.58212e-06	0.0653453
1248	8.03355e-05	9.72532e-06	6.48355e-06	0.267785
1249	4.23377e-05	5.12535e-06	3.4169e-06	0.141126
1250	9.55863e-05	1.15716e-05	7.71438e-06	0.318621
1251	4.76176e-05	5.76453e-06	3.84302e-06	0.158725
1252	6.59657e-05	7.98573e-06	5.32382e-06	0.219886
1253	8.14212e-05	9.85675e-06	6.57117e-06	0.271404
1254	7.54513e-05	9.13405e-06	6.08937e-06	0.251504
1255	3.46105e-05	4.18991e-06	2.79327e-06	0.115368
1256	7.11254e-05	8.61036e-06	5.74024e-06	0.237085
1257	3.60259e-05	4.36126e-06	2.90751e-06	0.120086
1258	4.94221e-05	5.98298e-06	3.98865e-06	0.16474
1259	5.11722e-05	6.19484e-06	4.12989e-06	0.170574
1260	9.69343e-05	1.17348e-05	7.82317e-06	0.323114
1261	4.56424e-05	5.52542e-06	3.68361e-06	0.152141
1262	0.000202832	2.45547e-05	1.63698e-05	0.676108
1263	0.000103972	1.25868e-05	8.39118e-06	0.346574
1264	0.000117611	1.42379e-05	9.49193e-06	0.392038
1265	5.86566e-05	7.1009e-06	4.73393e-06	0.195522
1266	4.88898e-05	5.91855e-06	3.9457e-06	0.162966
1267	0.000103631	1.25454e-05	8.36362e-06	0.345436
1268	4.29484e-05	5.19928e-06	3.46619e-06	0.143161
1269	4.25399e-05	5.14983e-06	3.43322e-06	0.1418
1270	6.25459e-05	7.57174e-06	5.04783e-06	0.208486
1271	6.18487e-05	7.48733e-06	4.99155e-06	0.206162
1272	4.38386e-05	5.30705e-06	3.53803e-06	0.146129
1273	6.63561e-05	8.03299e-06	5.35532e-06	0.221187
1274	8.9534e-05	1.08389e-05	7.22592e-06	0.298447
1275	4.63294e-05	5.60858e-06	3.73905e-06	0.154431
1276	5.95641e-05	7.21076e-06	4.80717e-06	0.198547
1277	8.61394e-05	1.04279e-05	6.95196e-06	0.287131
1278	5.65594e-05	6.84702e-06	4.56468e-06	0.188531
1279	8.90131e-05	1.07758e-05	7.18388e-06	0.29671
1280	6.53032e-05	7.90553e-06	5.27035e-06	0.217677
1281	0.000110547	1.33827e-05	8.92183e-06	0.368491
1282	4.09566e-05	4.95816e-06	3.30544e-06	0.136522
1283	6.60688e-05	7.99821e-06	5.33214e-06	0.220229
1284	4.35248e-05	5.26906e-06	3.51271e-06	0.145083
1285	4.38795e-05	5.312e-06	3.54133e-06	0.146265
1286	4.81462e-05	5.82852e-06	3.88568e-06	0.160487
1287	9.24276e-05	1.11892e-05	7.45945e-06	0.308092
1288	7.62065e-05	9.22546e-06	6.15031e-06	0.254022
1289	9.72153e-05	1.17688e-05	7.84585e-06	0.324051
1290	8.80566e-05	1.066e-05	7.10668e-06	0.293522
1291	7.83467e-05	9.48456e-06	6.32304e-06	0.261156
1292	4.19124e-05	5.07387e-06	3.38258e-06	0.139708
1293	9.16027e-05	1.10893e-05	7.39288e-06	0.305342
1294	6.53861e-05	7.91556e-06	5.27704e-06	0.217954
1295	5.5276e-05	6.69165e-06	4.4611e-06	0.184253
1296	5.56304e-05	6.73454e-06	4.4897e-06	0.185435
1297	6.90106e-05	8.35434e-06	5.56956e-06	0.230035
1298	1.71018e-05	2.07032e-06	1.38021e-06	0.0570059
1299	6.49594e-05	7.86391e-06	5.24261e-06	0.216531
1300	3.30259e-05	3.99808e-06	2.66539e-06	0.110086
1301	5.58636e-05	6.76279e-06	4.50852e-06	0.186212
1302	4.91041e-05	5.94448e-06	3.96299e-06	0.16368
1303	6.67244e-05	8.07758e-06	5.38505e-06	0.222415
1304	9.92641e-05	1.20168e-05	8.0112e-06	0.33088
1305	6.61829e-05	8.01202e-06	5.34135e-06	0.22061
1306	3.81313e-05	4.61613e-06	3.07742e-06	0.127104
1307	6.67801e-05	8.08432e-06	5.38955e-06	0.2226
1308	0.000109101	1.32076e-05	8.8051e-06	0.36367
1309	7.82161e-05	9.46875e-06	6.3125e-06	0.26072
1310	3.81052e-05	4.61297e-06	3.07531e-06	0.127017
1311	0.000115662	1.40018e-05	9.33457e-06	0.385538
1312	0.000110104	1.33291e-05	8.88607e-06	0.367015
1313	4.18352e-05	5.06453e-06	3.37635e-06	0.139451
1314	6.20409e-05	7.5106e-06	5.00707e-06	0.206803
1315	3.99487e-05	4.83615e-06	3.2241e-06	0.133162
1316	2.50919e-05	3.03759e-06	2.02506e-06	0.0836395
1317	9.52252e-05	1.15279e-05	7.68524e-06	0.317417
1318	6.02317e-05	7.29157e-06	4.86105e-06	0.200772
1319	0.000111551	1.35042e-05	9.00283e-06	0.371837
1320	8.10005e-05	9.80582e-06	6.53721e-06	0.270002
1321	0.000100067	1.21139e-05	8.07596e-06	0.333555
1322	4.83106e-05	5.84842e-06	3.89895e-06	0.161035
1323	5.79023e-05	7.00959e-06	4.67306e-06	0.193008
1324	9.82862e-05	1.18984e-05	7.93228e-06	0.327621
1325	4.46789e-05	5.40877e-06	3.60585e-06	0.14893
1326	0.000109583	1.3266e-05	8.844e-06	0.365277
1327	5.77945e-05	6.99653e-06	4.66435e-06	0.192648
1328	5.19061e-05	6.2837e-06	4.18913e-06	0.17302
1329	0.000178541	2.1614e-05	1.44093e-05	0.595138
1330	8.13441e-05	9.84742e-06	6.56495e-06	0.271147
1331	6.69417e-05	8.10388e-06	5.40259e-06	0.223139
1332	5.8974e-05	7.13933e-06	4.75955e-06	0.19658
1333	7.02437e-05	8.50362e-06	5.66908e-06	0.234146
1334	7.14375e-05	8.64814e-06	5.76542e-06	0.238125
1335	2.87688e-05	3.48272e-06	2.32181e-06	0.0958961
1336	2.95564e-05	3.57806e-06	2.38538e-06	0.0985213
1337	6.6931e-05	8.10259e-06	5.40173e-06	0.223103
1338	4.39987e-05	5.32643e-06	3.55095e-06	0.146662
1339	5.82838e-05	7.05576e-06	4.70384e-06	0.194279
1340	0.000115955	1.40374e-05	9.35826e-06	0.386517
1341	8.33227e-05	1.00869e-05	6.72463e-06	0.277742
1342	5.00798e-05	6.06261e-06	4.04174e-06	0.166933
1343	5.09829e-05	6.17193e-06	4.11462e-06	0.169943
1344	7.22594e-05	8.74764e-06	5.83176e-06	0.240865
1345	5.44585e-05	6.59269e-06	4.39512e-06	0.181528
1346	6.62193e-05	8.01643e-06	5.34429e-06	0.220731
1347	3.20352e-05	3.87814e-06	2.58543e-06	0.106784
1348	7.11443e-05	8.61265e-06	5.74177e-06	0.237148
1349	4.61837e-05	5.59094e-06	3.72729e-06	0.153946
1350	9.33092e-05	1.12959e-05	7.5306e-06	0.311031
1351	4.70433e-05	5.69501e-06	3.79667e-06	0.156811
1352	3.47756e-05	4.20989e-06	2.80659e-06	0.115919
1353	3.57036e-05	4.32224e-06	2.88149e-06	0.119012
1354	4.854e-05	5.8762e-06	3.91747e-06	0.1618
1355	6.90371e-05	8.35754e-06	5.5717e-06	0.230124
1356	5.53433e-05	6.6998e-06	4.46653e-06	0.184478
1357	9.90908e-05	1.19958e-05	7.99721e-06	0.330303
1358	0.000100129	1.21215e-05	8.08098e-06	0.333763
1359	2.30372e-05	2.78885e-06	1.85924e-06	0.0767906
1360	4.64072e-05	5.618e-06	3.74533e-06	0.154691
1361	4.43065e-05	5.36369e-06	3.57579e-06	0.147688
1362	6.7408e-05	8.16033e-06	5.44022e-06	0.224693
1363	8.38544e-05	1.01513e-05	6.76754e-06	0.279515
1364	5.85201e-05	7.08438e-06	4.72292e-06	0.195067
1365	5.40889e-05	6.54793e-06	4.36529e-06	0.180296
1366	2.51699e-05	3.04704e-06	2.03136e-06	0.0838997
1367	0.000104217	1.26164e-05	8.41092e-06	0.34739
1368	0.000123791	1.4986e-05	9.99065e-06	0.412636
1369	7.62481e-05	9.23051e-06	6.15367e-06	0.25416
1370	6.89992e-05	8.35297e-06	5.56864e-06	0.229997
1371	9.22273e-05	1.11649e-05	7.44329e-06	0.307424
1372	6.13802e-05	7.43061e-06	4.95374e-06	0.204601
1373	1.77744e-05	2.15175e-06	1.4345e-06	0.059248
1374	4.68955e-05	5.67711e-06	3.78474e-06	0.156318
1375	5.81901e-05	7.04442e-06	4.69628e-06	0.193967
1376	4.59219e-05	5.55925e-06	3.70617e-06	0.153073
1377	7.00937e-05	8.48546e-06	5.65697e-06	0.233646
1378	8.32752e-05	1.00812e-05	6.7208e-06	0.277584
1379	6.03467e-05	7.3055e-06	4.87033e-06	0.201156
1380	2.76247e-05	3.34421e-06	2.22947e-06	0.0920822
1381	5.0765e-05	6.14556e-06	4.09704e-06	0.169217
1382	3.28458e-05	3.97627e-06	2.65085e-06	0.109486
1383	2.65283e-05	3.21148e-06	2.14099e-06	0.0884276
1384	0.00023683	2.86704e-05	1.91136e-05	0.789435
1385	0.000110639	1.33938e-05	8.92921e-06	0.368796
1386	7.11974e-05	8.61908e-06	5.74605e-06	0.237325
1387	7.59208e-05	9.19088e-06	6.12725e-06	0.253069
1388	5.04759e-05	6.11055e-06	4.0737e-06	0.168253
1389	3.26941e-05	3.95791e-06	2.63861e-06	0.10898
1390	6.0007e-05	7.26438e-06	4.84292e-06	0.200023
1391	9.41592e-05	1.13988e-05	7.5992e-06	0.313864
1392	0.000113947	1.37943e-05	9.19622e-06	0.379824
1393	9.26708e-05	1.12186e-05	7.47908e-06	0.308903
1394	6.37458e-05	7.71699e-06	5.14466e-06	0.212486
1395	4.38084e-05	5.30339e-06	3.53559e-06	0.146028
1396	0.000103595	1.25411e-05	8.36076e-06	0.345318
1397	4.18567e-05	5.06712e-06	3.37808e-06	0.139522
1398	3.23366e-05	3.91463e-06	2.60976e-06	0.107789
1399	0.000118907	1.43947e-05	9.59646e-06	0.396355
1400	5.11309e-05	6.18984e-06	4.12656e-06	0.170436
1401	6.38905e-05	7.73451e-06	5.15634e-06	0.212968
1402	4.96399e-05	6.00935e-06	4.00623e-06	0.165466
1403	4.03446e-05	4.88407e-06	3.25605e-06	0.134482
1404	3.54276e-05	4.28882e-06	2.85921e-06	0.118092
1405	4.76973e-05	5.77418e-06	3.84945e-06	0.158991
1406	5.12852e-05	6.20852e-06	4.13902e-06	0.170951
1407	0.000153784	1.86169e-05	1.24113e-05	0.512614
1408	7.07854e-05	8.56919e-06	5.7128e-06	0.235951
1409	6.35969e-05	7.69897e-06	5.13265e-06	0.21199
1410	3.44833e-05	4.17451e-06	2.78301e-06	0.114944
1411	4.22585e-05	5.11576e-06	3.41051e-06	0.140862
1412	6.42436e-05	7.77725e-06	5.18483e-06	0.214145
1413	8.88028e-05	1.07504e-05	7.16691e-06	0.296009
1414	0.000180764	2.1883e-05	1.45887e-05	0.602546
1415	0.000157624	1.90818e-05	1.27212e-05	0.525415
1416	2.50417e-05	3.03151e-06	2.02101e-06	0.0834722
1417	4.72805e-05	5.72372e-06	3.81581e-06	0.157602
1418	5.90091e-05	7.14357e-06	4.76238e-06	0.196697
1419	5.76638e-05	6.98071e-06	4.6538e-06	0.192213
1420	4.72341e-05	5.71811e-06	3.81207e-06	0.157447
1421	4.68176e-05	5.66768e-06	3.77845e-06	0.156059
1422	0.000160435	1.94221e-05	1.29481e-05	0.534784
1423	4.40449e-05	5.33202e-06	3.55468e-06	0.146816
1424	6.21025e-05	7.51806e-06	5.01204e-06	0.207008
1425	3.26893e-05	3.95733e-06	2.63822e-06	0.108964
1426	0.000119121	1.44206e-05	9.61376e-06	0.39707
1427	3.24521e-05	3.92861e-06	2.61907e-06	0.108174
1428	0.000289975	3.5104e-05	2.34027e-05	0.966584
1429	0.00010155	1.22935e-05	8.19567e-06	0.338499
1430	0.000117111	1.41773e-05	9.45151e-06	0.390369
1431	4.84051e-05	5.85986e-06	3.90657e-06	0.16135
1432	6.31487e-05	7.6447e-06	5.09647e-06	0.210496
1433	8.16406e-05	9.88332e-06	6.58888e-06	0.272135
1434	6.9822e-05	8.45257e-06	5.63505e-06	0.23274
1435	8.85775e-05	1.07231e-05	7.14872e-06	0.295258
1436	5.9093e-05	7.15373e-06	4.76916e-06	0.196977
1437	8.78309e-05	1.06327e-05	7.08847e-06	0.29277
1438	8.53094e-05	1.03275e-05	6.88497e-06	0.284365
1439	6.11722e-05	7.40543e-06	4.93696e-06	0.203907
1440	4.35477e-05	5.27183e-06	3.51455e-06	0.145159
1441	7.87688e-05	9.53566e-06	6.35711e-06	0.262563
1442	5.47805e-05	6.63166e-06	4.42111e-06	0.182602
1443	5.82718e-05	7.05431e-06	4.70287e-06	0.194239
1444	6.99281e-05	8.46541e-06	5.64361e-06	0.233094
1445	4.09049e-05	4.9519e-06	3.30126e-06	0.13635
1446	5.60178e-05	6.78145e-06	4.52097e-06	0.186726
1447	4.86702e-05	5.89196e-06	3.92797e-06	0.162234
1448	4.58236e-05	5.54735e-06	3.69824e-06	0.152745
1449	4.04829e-05	4.90082e-06	3.26721e-06	0.134943
1450	5.9898e-05	7.25118e-06	4.83412e-06	0.19966
1451	5.28524e-05	6.39825e-06	4.2655e-06	0.176175
1452	2.45186e-05	2.9682e-06	1.9788e-06	0.0817288
1453	2.8142e-05	3.40684e-06	2.27123e-06	0.0938067
1454	6.90516e-05	8.35931e-06	5.57287e-06	0.230172
1455	0.000147872	1.79012e-05	1.19341e-05	0.492906
1456	3.65068e-05	4.41947e-06	2.94631e-06	0.121689
1457	9.36789e-05	1.13407e-05	7.56043e-06	0.312263
1458	4.58668e-05	5.55258e-06	3.70172e-06	0.152889
1459	5.89682e-05	7.13862e-06	4.75908e-06	0.196561
1460	7.04259e-05	8.52568e-06	5.68379e-06	0.234753
1461	5.94761e-05	7.2001e-06	4.80007e-06	0.198254
1462	0.000116459	1.40984e-05	9.3989e-06	0.388196
1463	7.36366e-05	8.91436e-06	5.94291e-06	0.245455
1464	7.19028e-05	8.70446e-06	5.80298e-06	0.239676
1465	7.97644e-05	9.65618e-06	6.43746e-06	0.265881
1466	6.20395e-05	7.51043e-06	5.00695e-06	0.206798
1467	4.60454e-05	5.5742e-06	3.71614e-06	0.153485
1468	6.14437e-05	7.43831e-06	4.95887e-06	0.204812
1469	0.000132292	1.60151e-05	1.06767e-05	0.440973
1470	3.42462e-05	4.1458e-06	2.76387e-06	0.114154
1471	6.67769e-05	8.08393e-06	5.38929e-06	0.22259
1472	0.00010522	1.27378e-05	8.49187e-06	0.350733
1473	4.63774e-05	5.61439e-06	3.74293e-06	0.154591
1474	5.02049e-05	6.07775e-06	4.05183e-06	0.16735
1475	4.3309e-05	5.24293e-06	3.49529e-06	0.144363
1476	2.24623e-05	2.71926e-06	1.81284e-06	0.0748744
1477	4.77183e-05	5.77672e-06	3.85115e-06	0.159061
1478	4.26391e-05	5.16184e-06	3.44123e-06	0.14213
1479	7.09393e-05	8.58783e-06	5.72522e-06	0.236464
1480	1.54584e-05	1.87137e-06	1.24758e-06	0.051528
1481	4.70878e-05	5.70039e-06	3.80026e-06	0.156959
1482	4.03895e-05	4.8895e-06	3.25967e-06	0.134632
1483	0.000134836	1.63231e-05	1.08821e-05	0.449455
1484	5.35139e-05	6.47833e-06	4.31888e-06	0.17838
1485	0.000103613	1.25433e-05	8.36221e-06	0.345378
1486	0.00010682	1.29315e-05	8.62103e-06	0.356068
1487	0.000180661	2.18706e-05	1.45804e-05	0.602204
1488	5.31941e-05	6.43961e-06	4.29307e-06	0.177314
1489	0.000105793	1.28072e-05	8.53814e-06	0.352644
1490	2.56446e-05	3.10451e-06	2.06967e-06	0.085482
1491	8.27775e-05	1.0021e-05	6.68063e-06	0.275925
1492	5.14328e-05	6.22639e-06	4.15093e-06	0.171443
1493	5.20034e-05	6.29547e-06	4.19698e-06	0.173345
1494	5.41607e-05	6.55663e-06	4.37109e-06	0.180536
1495	8.35522e-05	1.01147e-05	6.74315e-06	0.278507
1496	6.16957e-05	7.46881e-06	4.9792e-06	0.205652
1497	5.97434e-05	7.23247e-06	4.82165e-06	0.199145
1498	4.97519e-05	6.02291e-06	4.01527e-06	0.16584
1499	4.60511e-05	5.5749e-06	3.7166e-06	0.153504
1500	2.75993e-05	3.34113e-06	2.22742e-06	0.0919975
1501	0.000121085	1.46584e-05	9.77226e-06	0.403616
1502	8.62581e-05	1.04423e-05	6.96154e-06	0.287527
1503	7.37173e-05	8.92413e-06	5.94942e-06	0.245724
1504	0.000123732	1.49789e-05	9.98592e-06	0.412441
1505	8.08619e-05	9.78905e-06	6.52603e-06	0.26954
1506	5.33066e-05	6.45324e-06	4.30216e-06	0.177689
1507	0.000101889	1.23346e-05	8.22304e-06	0.33963
1508	5.88067e-05	7.11907e-06	4.74604e-06	0.196022
1509	0.000138407	1.67554e-05	1.11702e-05	0.461356
1510	8.45542e-05	1.0236e-05	6.82402e-06	0.281847
1511	4.7046e-05	5.69533e-06	3.79689e-06	0.15682
1512	7.16674e-05	8.67597e-06	5.78398e-06	0.238891
1513	7.17103e-05	8.68116e-06	5.78744e-06	0.239034
1514	3.80306e-05	4.60394e-06	3.0693e-06	0.126769
1515	5.05588e-05	6.12059e-06	4.08039e-06	0.168529
1516	9.64137e-05	1.16717e-05	7.78115e-06	0.321379
1517	6.63815e-05	8.03607e-06	5.35738e-06	0.221272
1518	4.23394e-05	5.12556e-06	3.41704e-06	0.141131
1519	4.99792e-05	6.05042e-06	4.03362e-06	0.166597
1520	8.44809e-05	1.02272e-05	6.81811e-06	0.281603
1521	7.93611e-05	9.60736e-06	6.40491e-06	0.264537
1522	5.81885e-05	7.04423e-06	4.69615e-06	0.193962
1523	7.55911e-05	9.15097e-06	6.10064e-06	0.25197
1524	9.80672e-05	1.18719e-05	7.9146e-06	0.326891
1525	6.52949e-05	7.90452e-06	5.26968e-06	0.21765
1526	5.41212e-05	6.55185e-06	4.3679e-06	0.180404
1527	4.99596e-05	6.04805e-06	4.03204e-06	0.166532
1528	7.4188e-05	8.98112e-06	5.98741e-06	0.247293
1529	5.81575e-05	7.04048e-06	4.69365e-06	0.193858
1530	6.22802e-05	7.53957e-06	5.02638e-06	0.207601
1531	4.50762e-05	5.45688e-06	3.63792e-06	0.150254
1532	5.13496e-05	6.21632e-06	4.14422e-06	0.171165
1533	5.80541e-05	7.02796e-06	4.68531e-06	0.193514
1534	4.04089e-05	4.89186e-06	3.26124e-06	0.134696
1535	5.03914e-05	6.10033e-06	4.06688e-06	0.167971
1536	5.60689e-05	6.78764e-06	4.52509e-06	0.186896
1537	5.34491e-05	6.47049e-06	4.31366e-06	0.178164
1538	5.61696e-05	6.79983e-06	4.53322e-06	0.187232
1539	3.7269e-05	4.51174e-06	3.00783e-06	0.12423
1540	2.46896e-05	2.98889e-06	1.9926e-06	0.0822987
1541	2.46272e-05	2.98134e-06	1.98756e-06	0.0820905
1542	6.50917e-05	7.87992e-06	5.25328e-06	0.216972
1543	3.78439e-05	4.58134e-06	3.05423e-06	0.126146
1544	6.91351e-05	8.36941e-06	5.57961e-06	0.23045
1545	5.51485e-05	6.67621e-06	4.45081e-06	0.183828
1546	9.8877e-05	1.19699e-05	7.97996e-06	0.32959
1547	0.000105121	1.27259e-05	8.4839e-06	0.350404
1548	5.15209e-05	6.23706e-06	4.15804e-06	0.171736
1549	1.99402e-05	2.41394e-06	1.60929e-06	0.0664675
1550	5.68147e-05	6.87792e-06	4.58528e-06	0.189382
1551	4.73163e-05	5.72806e-06	3.81871e-06	0.157721
1552	4.18178e-05	5.06242e-06	3.37495e-06	0.139393
1553	4.59869e-05	5.56712e-06	3.71142e-06	0.15329
1554	0.000105582	1.27817e-05	8.52112e-06	0.351941
1555	6.15334e-05	7.44916e-06	4.9661e-06	0.205111
1556	0.00011726	1.41953e-05	9.46356e-06	0.390866
1557	4.03126e-05	4.8802e-06	3.25346e-06	0.134375
1558	3.35743e-05	4.06446e-06	2.70964e-06	0.111914
1559	6.79541e-05	8.22644e-06	5.48429e-06	0.226514
1560	0.000122543	1.48349e-05	9.88993e-06	0.408476
1561	6.51566e-05	7.88779e-06	5.25852e-06	0.217189
1562	4.12763e-05	4.99687e-06	3.33124e-06	0.137588
1563	5.0563e-05	6.1211e-06	4.08073e-06	0.168543
1564	3.78252e-05	4.57908e-06	3.05272e-06	0.126084
1565	7.64816e-05	9.25877e-06	6.17251e-06	0.254939
1566	5.73565e-05	6.94351e-06	4.62901e-06	0.191188
1567	4.59336e-05	5.56066e-06	3.70711e-06	0.153112
1568	2.88779e-05	3.49593e-06	2.33062e-06	0.0962597
1569	6.83551e-05	8.27498e-06	5.51666e-06	0.22785
1570	3.44489e-05	4.17035e-06	2.78023e-06	0.11483
1571	8.69188e-05	1.05223e-05	7.01486e-06	0.289729
1572	2.75599e-05	3.33637e-06	2.22424e-06	0.0918662
1573	7.38628e-05	8.94175e-06	5.96117e-06	0.246209
1574	2.31469e-05	2.80213e-06	1.86809e-06	0.0771563
1575	2.08846e-05	2.52827e-06	1.68551e-06	0.0696155
1576	7.92094e-05	9.589e-06	6.39266e-06	0.264031
1577	4.1989e-05	5.08314e-06	3.38876e-06	0.139963
1578	5.61471e-05	6.7971e-06	4.5314e-06	0.187157
1579	5.05509e-05	6.11963e-06	4.07975e-06	0.168503
1580	7.53409e-05	9.12068e-06	6.08045e-06	0.251136
1581	6.92027e-05	8.3776e-06	5.58507e-06	0.230676
1582	5.70694e-05	6.90875e-06	4.60584e-06	0.190231
1583	4.43048e-05	5.36348e-06	3.57566e-06	0.147683
1584	4.66042e-05	5.64185e-06	3.76123e-06	0.155347
1585	7.85234e-05	9.50595e-06	6.3373e-06	0.261745
1586	9.25109e-05	1.11993e-05	7.46617e-06	0.30837
1587	8.20172e-05	9.92891e-06	6.61927e-06	0.273391
1588	5.96879e-05	7.22574e-06	4.81716e-06	0.19896
1589	7.92121e-05	9.58933e-06	6.39288e-06	0.26404
1590	8.96409e-05	1.08518e-05	7.23455e-06	0.298803
1591	9.03865e-05	1.09421e-05	7.29472e-06	0.301288
1592	7.55755e-05	9.14909e-06	6.09939e-06	0.251918
1593	7.94479e-05	9.61786e-06	6.41191e-06	0.264826
1594	2.13233e-05	2.58137e-06	1.72092e-06	0.0710777
1595	4.47989e-05	5.4233e-06	3.61553e-06	0.14933
1596	7.41302e-05	8.97411e-06	5.98274e-06	0.247101
1597	5.38672e-05	6.5211e-06	4.3474e-06	0.179557
1598	5.01631e-05	6.07268e-06	4.04845e-06	0.16721
1599	0.000176589	2.13776e-05	1.42517e-05	0.588629
1600	5.55476e-05	6.72452e-06	4.48302e-06	0.185159
1601	0.000165883	2.00815e-05	1.33877e-05	0.552942
1602	0.000101694	1.23109e-05	8.20728e-06	0.338979
1603	5.87949e-05	7.11764e-06	4.74509e-06	0.195983
1604	0.000257503	3.1173e-05	2.0782e-05	0.858344
1605	3.0321e-05	3.67063e-06	2.44708e-06	0.10107
1606	9.2992e-05	1.12575e-05	7.505e-06	0.309973
1607	3.47841e-05	4.21092e-06	2.80728e-06	0.115947
1608	6.50662e-05	7.87684e-06	5.25122e-06	0.216887
1609	6.86286e-05	8.3081e-06	5.53873e-06	0.228762
1610	4.39349e-05	5.31871e-06	3.54581e-06	0.14645
1611	3.96173e-05	4.79602e-06	3.19735e-06	0.132058
1612	2.13238e-05	2.58144e-06	1.72096e-06	0.0710794
1613	6.33065e-05	7.66381e-06	5.10921e-06	0.211022
1614	0.000123343	1.49317e-05	9.95448e-06	0.411142
1615	6.94967e-05	8.41319e-06	5.60879e-06	0.231656
1616	7.30723e-05	8.84605e-06	5.89736e-06	0.243574
1617	5.38021e-05	6.51321e-06	4.34214e-06	0.17934
1618	4.15802e-05	5.03366e-06	3.35577e-06	0.138601
1619	6.34689e-05	7.68347e-06	5.12231e-06	0.211563
1620	4.12598e-05	4.99487e-06	3.32991e-06	0.137533
1621	2.60777e-05	3.15693e-06	2.10462e-06	0.0869255
1622	4.4525e-05	5.39014e-06	3.59343e-06	0.148417
1623	5.71712e-05	6.92108e-06	4.61405e-06	0.190571
1624	0.000330381	3.99955e-05	2.66637e-05	1.10127
1625	9.2911e-05	1.12477e-05	7.49846e-06	0.309703
1626	2.3354e-05	2.82721e-06	1.88481e-06	0.0778468
1627	5.29787e-05	6.41354e-06	4.27569e-06	0.176596
1628	7.21741e-05	8.73731e-06	5.82488e-06	0.24058
1629	3.28336e-05	3.9748e-06	2.64986e-06	0.109445
1630	9.42619e-05	1.14112e-05	7.60749e-06	0.314206
1631	3.40044e-05	4.11654e-06	2.74436e-06	0.113348
1632	3.96127e-05	4.79547e-06	3.19698e-06	0.132042
1633	4.65503e-05	5.63532e-06	3.75688e-06	0.155168
1634	3.84873e-05	4.65922e-06	3.10615e-06	0.128291
1635	4.48168e-05	5.42547e-06	3.61698e-06	0.149389
1636	0.000106741	1.29219e-05	8.61461e-06	0.355803
1637	4.02622e-05	4.87409e-06	3.24939e-06	0.134207
1638	4.03803e-05	4.88839e-06	3.25893e-06	0.134601
1639	3.74541e-05	4.53415e-06	3.02276e-06	0.124847
1640	0.000104751	1.2681e-05	8.45399e-06	0.349169
1641	3.69699e-05	4.47554e-06	2.98369e-06	0.123233
1642	8.00294e-05	9.68826e-06	6.45884e-06	0.266765
1643	5.12336e-05	6.20228e-06	4.13485e-06	0.170779
1644	3.0228e-05	3.65937e-06	2.43958e-06	0.10076
1645	5.77744e-05	6.9941e-06	4.66273e-06	0.192581
1646	0.000123221	1.4917e-05	9.9447e-06	0.410738
1647	2.00564e-05	2.428e-06	1.61867e-06	0.0668546
1648	4.34135e-05	5.25559e-06	3.50373e-06	0.144712
1649	0.000124205	1.50361e-05	1.00241e-05	0.414016
1650	4.40771e-05	5.33593e-06	3.55728e-06	0.146924
1651	4.31595e-05	5.22483e-06	3.48322e-06	0.143865
1652	4.09155e-05	4.95318e-06	3.30212e-06	0.136385
1653	5.05861e-05	6.12389e-06	4.0826e-06	0.16862
1654	2.6842e-05	3.24946e-06	2.16631e-06	0.0894733
1655	6.96856e-05	8.43606e-06	5.62404e-06	0.232285
1656	8.50796e-05	1.02996e-05	6.86643e-06	0.283599
1657	7.62725e-05	9.23346e-06	6.15564e-06	0.254242
1658	6.09681e-05	7.38073e-06	4.92049e-06	0.203227
1659	2.79146e-05	3.37931e-06	2.25287e-06	0.0930486
1660	6.8661e-05	8.31202e-06	5.54135e-06	0.22887
1661	5.5643e-05	6.73608e-06	4.49072e-06	0.185477
1662	9.31646e-05	1.12784e-05	7.51893e-06	0.310549
1663	7.24018e-05	8.76488e-06	5.84325e-06	0.241339
1664	3.27401e-05	3.96348e-06	2.64232e-06	0.109134
1665	0.000228236	2.763e-05	1.842e-05	0.760788
1666	6.69254e-05	8.10191e-06	5.40127e-06	0.223085
1667	6.37382e-05	7.71607e-06	5.14405e-06	0.212461
1668	0.000161773	1.9584e-05	1.3056e-05	0.539242
1669	4.54997e-05	5.50814e-06	3.6721e-06	0.151666
1670	0.000130548	1.5804e-05	1.0536e-05	0.435159
1671	0.00015922	1.9275e-05	1.285e-05	0.530734
1672	4.36992e-05	5.29018e-06	3.52678e-06	0.145664
1673	6.80418e-05	8.23706e-06	5.49137e-06	0.226806
1674	2.8555e-05	3.45683e-06	2.30456e-06	0.0951833
1675	3.68765e-05	4.46422e-06	2.97615e-06	0.122922
1676	4.35867e-05	5.27656e-06	3.51771e-06	0.145289
1677	4.75774e-05	5.75966e-06	3.83978e-06	0.158591
1678	0.000101503	1.22879e-05	8.19193e-06	0.338345
1679	5.06308e-05	6.12931e-06	4.08621e-06	0.168769
1680	3.64725e-05	4.41532e-06	2.94355e-06	0.121575
1681	6.11709e-05	7.40527e-06	4.93685e-06	0.203903
1682	4.40315e-05	5.33041e-06	3.5536e-06	0.146772
1683	0.000108945	1.31888e-05	8.79252e-06	0.363151
1684	8.71367e-05	1.05487e-05	7.03245e-06	0.290456
1685	5.7561e-05	6.96827e-06	4.64551e-06	0.19187
1686	0.000119415	1.44563e-05	9.63751e-06	0.398051
1687	4.32718e-05	5.23844e-06	3.49229e-06	0.144239
1688	4.80707e-05	5.81938e-06	3.87959e-06	0.160236
1689	6.95136e-05	8.41523e-06	5.61015e-06	0.231712
1690	7.72743e-05	9.35474e-06	6.23649e-06	0.257581
1691	9.15248e-05	1.10799e-05	7.38659e-06	0.305083
1692	3.1186e-05	3.77535e-06	2.5169e-06	0.103953
1693	3.98423e-05	4.82327e-06	3.21551e-06	0.132808
1694	3.46216e-05	4.19125e-06	2.79417e-06	0.115405
1695	0.000114152	1.3819e-05	9.2127e-06	0.380505
1696	9.85445e-05	1.19297e-05	7.95312e-06	0.328482
1697	4.44982e-05	5.3869e-06	3.59127e-06	0.148327
1698	8.02486e-05	9.7148e-06	6.47653e-06	0.267495
1699	0.000102682	1.24305e-05	8.28702e-06	0.342272
1700	3.33435e-05	4.03653e-06	2.69102e-06	0.111145
1701	0.000102651	1.24269e-05	8.28457e-06	0.342171
1702	5.48446e-05	6.63943e-06	4.42628e-06	0.182815
1703	8.09566e-05	9.80051e-06	6.53367e-06	0.269855
1704	8.80322e-05	1.06571e-05	7.10472e-06	0.293441
1705	9.39848e-05	1.13777e-05	7.58512e-06	0.313283
1706	3.62497e-05	4.38835e-06	2.92557e-06	0.120832
1707	2.59733e-05	3.14429e-06	2.0962e-06	0.0865776
1708	7.25309e-05	8.78051e-06	5.85367e-06	0.24177
1709	3.02186e-05	3.65823e-06	2.43882e-06	0.100729
1710	8.63846e-05	1.04576e-05	6.97174e-06	0.287949
1711	0.000228412	2.76513e-05	1.84342e-05	0.761373
1712	4.90485e-05	5.93776e-06	3.9585e-06	0.163495
1713	5.36156e-05	6.49064e-06	4.32709e-06	0.178719
1714	2.89659e-05	3.50658e-06	2.33772e-06	0.0965531
1715	5.22553e-05	6.32596e-06	4.21731e-06	0.174184
1716	6.98688e-05	8.45823e-06	5.63882e-06	0.232896
1717	6.48191e-05	7.84692e-06	5.23128e-06	0.216064
1718	4.49381e-05	5.44015e-06	3.62677e-06	0.149794
1719	0.000224005	2.71178e-05	1.80785e-05	0.746684
1720	0.000143883	1.74184e-05	1.16122e-05	0.479611
1721	6.63946e-05	8.03766e-06	5.35844e-06	0.221315
1722	6.21444e-05	7.52313e-06	5.01542e-06	0.207148
1723	6.24231e-05	7.55687e-06	5.03791e-06	0.208077
1724	5.24561e-05	6.35028e-06	4.23352e-06	0.174854
1725	5.92108e-05	7.16799e-06	4.77866e-06	0.197369
1726	4.22527e-05	5.11506e-06	3.41004e-06	0.140842
1727	0.000105851	1.28141e-05	8.54276e-06	0.352835
1728	4.66469e-05	5.64702e-06	3.76468e-06	0.15549
1729	6.97577e-05	8.44478e-06	5.62986e-06	0.232526
1730	4.10818e-05	4.97332e-06	3.31554e-06	0.136939
1731	9.09474e-05	1.101e-05	7.33999e-06	0.303158
1732	5.86827e-05	7.10406e-06	4.73604e-06	0.195609
1733	3.23409e-05	3.91516e-06	2.6101e-06	0.107803
1734	8.90619e-05	1.07817e-05	7.18782e-06	0.296873
1735	4.8452e-05	5.86555e-06	3.91036e-06	0.161507
1736	0.000171426	2.07526e-05	1.38351e-05	0.571419
1737	5.96323e-05	7.21902e-06	4.81268e-06	0.198774
1738	5.19118e-05	6.28438e-06	4.18959e-06	0.173039
1739	3.46052e-05	4.18926e-06	2.79284e-06	0.115351
1740	7.29557e-05	8.83193e-06	5.88796e-06	0.243186
1741	0.000131197	1.58825e-05	1.05884e-05	0.437323
1742	3.12538e-05	3.78355e-06	2.52237e-06	0.104179
1743	8.71926e-05	1.05554e-05	7.03696e-06	0.290642
1744	3.36252e-05	4.07062e-06	2.71375e-06	0.112084
1745	5.76034e-05	6.9734e-06	4.64893e-06	0.192011
1746	1.55524e-05	1.88275e-06	1.25517e-06	0.0518413
1747	6.77783e-05	8.20517e-06	5.47011e-06	0.225928
1748	5.6729e-05	6.86755e-06	4.57836e-06	0.189097
1749	4.22445e-05	5.11407e-06	3.40938e-06	0.140815
1750	5.85338e-05	7.08603e-06	4.72402e-06	0.195113
1751	5.22266e-05	6.32249e-06	4.215e-06	0.174089
1752	5.20662e-05	6.30307e-06	4.20205e-06	0.173554
1753	6.19281e-05	7.49694e-06	4.99796e-06	0.206427
1754	6.65468e-05	8.05607e-06	5.37072e-06	0.221823
1755	8.72646e-05	1.05641e-05	7.04277e-06	0.290882
1756	3.78746e-05	4.58505e-06	3.0567e-06	0.126249
1757	4.66225e-05	5.64407e-06	3.76271e-06	0.155408
1758	9.79561e-05	1.18585e-05	7.90564e-06	0.32652
1759	8.68764e-05	1.05172e-05	7.01143e-06	0.289588
1760	2.22616e-05	2.69497e-06	1.79664e-06	0.0742054
1761	2.79694e-05	3.38595e-06	2.2573e-06	0.0932314
1762	0.00010841	1.3124e-05	8.74936e-06	0.361368
1763	4.11206e-05	4.97801e-06	3.31868e-06	0.137069
1764	7.62171e-05	9.22675e-06	6.15116e-06	0.254057
1765	5.43215e-05	6.5761e-06	4.38407e-06	0.181072
1766	6.60999e-05	8.00197e-06	5.33465e-06	0.220333
1767	6.00337e-05	7.26761e-06	4.84507e-06	0.200112
1768	0.000104252	1.26206e-05	8.41375e-06	0.347507
1769	2.75654e-05	3.33704e-06	2.22469e-06	0.0918847
1770	0.000133228	1.61284e-05	1.07523e-05	0.444092
1771	3.95956e-05	4.79339e-06	3.1956e-06	0.131985
1772	8.06753e-05	9.76646e-06	6.51097e-06	0.268918
1773	1.81275e-05	2.19449e-06	1.46299e-06	0.0604249
1774	5.01274e-05	6.06837e-06	4.04558e-06	0.167091
1775	6.49123e-05	7.85821e-06	5.23881e-06	0.216374
1776	9.48323e-05	1.14803e-05	7.65352e-06	0.316108
1777	3.90139e-05	4.72298e-06	3.14865e-06	0.130046
1778	6.82079e-05	8.25716e-06	5.50478e-06	0.22736
1779	5.90909e-05	7.15348e-06	4.76898e-06	0.19697
1780	3.0599e-05	3.70427e-06	2.46952e-06	0.101997
1781	9.08411e-05	1.09971e-05	7.33141e-06	0.302804
1782	0.000101901	1.2336e-05	8.224e-06	0.33967
1783	5.88697e-05	7.1267e-06	4.75113e-06	0.196232
1784	2.64326e-05	3.1999e-06	2.13327e-06	0.0881088
1785	4.98235e-05	6.03157e-06	4.02105e-06	0.166078
1786	0.000157867	1.91112e-05	1.27408e-05	0.526223
1787	3.69493e-05	4.47304e-06	2.98203e-06	0.123164
1788	9.28682e-05	1.12425e-05	7.49501e-06	0.309561
1789	8.68453e-05	1.05134e-05	7.00892e-06	0.289484
1790	8.23306e-05	9.96684e-06	6.64456e-06	0.274435
1791	4.94561e-05	5.9871e-06	3.9914e-06	0.164854
1792	6.98292e-05	8.45344e-06	5.63562e-06	0.232764
1793	8.80658e-05	1.06611e-05	7.10743e-06	0.293553
1794	5.16312e-05	6.25041e-06	4.16694e-06	0.172104
1795	4.69342e-05	5.6818e-06	3.78786e-06	0.156447
1796	2.59921e-05	3.14658e-06	2.09772e-06	0.0866404
1797	6.26747e-05	7.58733e-06	5.05822e-06	0.208916
1798	4.75459e-05	5.75585e-06	3.83723e-06	0.158486
1799	6.08294e-05	7.36394e-06	4.90929e-06	0.202765
1800	0.000205615	2.48916e-05	1.65944e-05	0.685385
1801	5.37918e-05	6.51197e-06	4.34131e-06	0.179306
1802	2.92492e-05	3.54088e-06	2.36059e-06	0.0974974
1803	3.82152e-05	4.62629e-06	3.08419e-06	0.127384
1804	5.54986e-05	6.71859e-06	4.47906e-06	0.184995
1805	5.60104e-05	6.78055e-06	4.52037e-06	0.186701
1806	8.15268e-05	9.86954e-06	6.57969e-06	0.271756
1807	3.89437e-05	4.71447e-06	3.14298e-06	0.129812
1808	0.00012507	1.51408e-05	1.00939e-05	0.4169
1809	2.99518e-05	3.62593e-06	2.41729e-06	0.0998394
1810	4.79303e-05	5.80239e-06	3.86826e-06	0.159768
1811	6.17947e-05	7.48079e-06	4.9872e-06	0.205982
1812	4.3085e-05	5.21582e-06	3.47721e-06	0.143617
1813	0.000105506	1.27724e-05	8.51491e-06	0.351685
1814	6.12404e-05	7.4137e-06	4.94246e-06	0.204135
1815	6.71973e-05	8.13483e-06	5.42322e-06	0.223991
1816	8.05802e-05	9.75494e-06	6.5033e-06	0.268601
1817	0.000120864	1.46317e-05	9.75445e-06	0.402881
1818	0.000106079	1.28418e-05	8.5612e-06	0.353597
1819	6.63735e-05	8.0351e-06	5.35673e-06	0.221245
1820	5.88901e-05	7.12917e-06	4.75278e-06	0.1963
1821	5.18504e-05	6.27695e-06	4.18463e-06	0.172835
1822	6.99063e-05	8.46277e-06	5.64185e-06	0.233021
1823	4.41715e-05	5.34735e-06	3.5649e-06	0.147238
1824	7.02337e-05	8.50241e-06	5.66828e-06	0.234112
1825	6.48697e-05	7.85305e-06	5.23536e-06	0.216232
1826	5.06838e-05	6.13572e-06	4.09048e-06	0.168946
1827	8.49873e-05	1.02885e-05	6.85897e-06	0.283291
1828	9.7305e-05	1.17796e-05	7.85308e-06	0.32435
1829	0.000129035	1.56208e-05	1.04139e-05	0.430116
1830	0.000148859	1.80207e-05	1.20138e-05	0.496196
1831	5.62272e-05	6.8068e-06	4.53787e-06	0.187424
1832	4.47245e-05	5.4143e-06	3.60953e-06	0.149082
1833	3.30158e-05	3.99686e-06	2.66457e-06	0.110053
1834	5.88838e-05	7.1284e-06	4.75227e-06	0.196279
1835	6.11581e-05	7.40372e-06	4.93582e-06	0.20386
1836	9.89334e-05	1.19768e-05	7.98451e-06	0.329778
1837	5.11856e-05	6.19647e-06	4.13098e-06	0.170619
1838	5.63679e-05	6.82383e-06	4.54922e-06	0.187893
1839	0.000134949	1.63367e-05	1.08912e-05	0.449829
1840	6.26913e-05	7.58934e-06	5.05956e-06	0.208971
1841	5.3979e-05	6.53464e-06	4.35642e-06	0.17993
1842	0.000121964	1.47648e-05	9.84323e-06	0.406547
1843	0.000109156	1.32142e-05	8.80949e-06	0.363852
1844	5.83516e-05	7.06398e-06	4.70932e-06	0.194505
1845	5.05636e-05	6.12117e-06	4.08078e-06	0.168545
1846	4.35477e-05	5.27183e-06	3.51455e-06	0.145159
1847	6.522e-05	7.89546e-06	5.26364e-06	0.2174
1848	4.34443e-05	5.25932e-06	3.50621e-06	0.144814
1849	2.78751e-05	3.37453e-06	2.24969e-06	0.092917
1850	2.39437e-05	2.89859e-06	1.93239e-06	0.0798122
1851	4.77551e-05	5.78118e-06	3.85412e-06	0.159184
1852	7.11934e-05	8.61859e-06	5.74573e-06	0.237311
1853	3.18455e-05	3.85518e-06	2.57012e-06	0.106152
1854	5.24741e-05	6.35246e-06	4.23497e-06	0.174914
1855	9.61887e-05	1.16445e-05	7.76299e-06	0.320629
1856	4.89086e-05	5.92081e-06	3.94721e-06	0.163029
1857	7.07079e-05	8.55982e-06	5.70655e-06	0.235693
1858	6.58958e-05	7.97727e-06	5.31818e-06	0.219653
1859	8.21636e-05	9.94662e-06	6.63108e-06	0.273879
1860	3.57665e-05	4.32985e-06	2.88657e-06	0.119222
1861	7.84823e-05	9.50098e-06	6.33398e-06	0.261608
1862	9.60602e-05	1.16289e-05	7.75263e-06	0.320201
1863	9.28945e-05	1.12457e-05	7.49714e-06	0.309648
1864	8.41735e-05	1.01899e-05	6.7933e-06	0.280578
1865	5.01751e-05	6.07414e-06	4.04942e-06	0.16725
1866	5.20904e-05	6.306e-06	4.204e-06	0.173635
1867	8.05114e-05	9.74662e-06	6.49775e-06	0.268371
1868	5.31044e-05	6.42876e-06	4.28584e-06	0.177015
1869	3.31502e-05	4.01312e-06	2.67542e-06	0.110501
1870	9.5151e-05	1.15189e-05	7.67924e-06	0.31717
1871	0.000361301	4.37387e-05	2.91591e-05	1.20434
1872	4.95372e-05	5.99692e-06	3.99795e-06	0.165124
1873	0.00011542	1.39726e-05	9.31508e-06	0.384734
1874	4.29908e-05	5.20441e-06	3.46961e-06	0.143303
1875	0.000137314	1.66231e-05	1.10821e-05	0.457715
1876	3.74007e-05	4.52769e-06	3.01846e-06	0.124669
1877	5.32062e-05	6.44108e-06	4.29406e-06	0.177354
1878	7.11175e-05	8.6094e-06	5.7396e-06	0.237058
1879	4.60473e-05	5.57443e-06	3.71629e-06	0.153491
1880	6.11133e-05	7.3983e-06	4.9322e-06	0.203711
1881	4.78616e-05	5.79407e-06	3.86271e-06	0.159539
1882	4.35045e-05	5.2666e-06	3.51107e-06	0.145015
1883	9.05662e-05	1.09638e-05	7.30923e-06	0.301887
1884	8.39308e-05	1.01606e-05	6.77371e-06	0.279769
1885	4.35602e-05	5.27334e-06	3.51556e-06	0.145201
1886	0.000108026	1.30775e-05	8.71834e-06	0.360087
1887	7.84931e-05	9.50228e-06	6.33486e-06	0.261644
1888	5.66391e-05	6.85666e-06	4.57111e-06	0.188797
1889	4.42837e-05	5.36093e-06	3.57395e-06	0.147612
1890	9.66325e-05	1.16982e-05	7.79881e-06	0.322108
1891	6.61093e-05	8.00311e-06	5.33541e-06	0.220364
1892	8.39129e-05	1.01584e-05	6.77227e-06	0.27971
1893	0.000100202	1.21303e-05	8.08689e-06	0.334007
1894	0.00011607	1.40513e-05	9.36756e-06	0.386901
1895	0.00016429	1.98888e-05	1.32592e-05	0.547635
1896	7.64794e-05	9.2585e-06	6.17233e-06	0.254931
1897	0.000112957	1.36745e-05	9.11633e-06	0.376525
1898	7.63303e-05	9.24045e-06	6.1603e-06	0.254434
1899	5.66374e-05	6.85646e-06	4.57097e-06	0.188791
1900	7.98842e-05	9.67069e-06	6.44713e-06	0.266281
1901	8.46212e-05	1.02441e-05	6.82943e-06	0.282071
1902	5.2149e-05	6.31309e-06	4.20873e-06	0.17383
1903	2.47396e-05	2.99495e-06	1.99664e-06	0.0824655
1904	1.68721e-05	2.04252e-06	1.36168e-06	0.0562404
1905	3.77681e-05	4.57216e-06	3.0481e-06	0.125894
1906	3.33425e-05	4.03641e-06	2.69094e-06	0.111142
1907	5.68222e-05	6.87882e-06	4.58588e-06	0.189407
1908	2.44048e-05	2.95442e-06	1.96961e-06	0.0813493
1909	0.000115773	1.40154e-05	9.3436e-06	0.385911
1910	0.000135442	1.63964e-05	1.09309e-05	0.451472
1911	4.06144e-05	4.91673e-06	3.27782e-06	0.135381
1912	3.57857e-05	4.33217e-06	2.88812e-06	0.119286
1913	2.57741e-05	3.12019e-06	2.08012e-06	0.0859137
1914	0.000107125	1.29684e-05	8.64561e-06	0.357083
1915	4.9559e-05	5.99955e-06	3.9997e-06	0.165197
1916	6.98425e-05	8.45505e-06	5.6367e-06	0.232808
1917	4.59552e-05	5.56328e-06	3.70885e-06	0.153184
1918	3.44123e-05	4.16592e-06	2.77728e-06	0.114708
1919	4.32853e-05	5.24006e-06	3.49338e-06	0.144284
1920	4.8563e-05	5.87898e-06	3.91932e-06	0.161877
1921	9.57673e-05	1.15935e-05	7.72898e-06	0.319224
1922	0.000160957	1.94852e-05	1.29902e-05	0.536522
1923	3.98555e-05	4.82486e-06	3.21657e-06	0.132852
1924	2.58218e-05	3.12596e-06	2.08397e-06	0.0860727
1925	3.99482e-05	4.83608e-06	3.22405e-06	0.133161
1926	2.71484e-05	3.28655e-06	2.19103e-06	0.0904945
1927	7.67322e-05	9.28911e-06	6.19274e-06	0.255774
1928	0.000107972	1.30709e-05	8.71394e-06	0.359905
1929	5.01823e-05	6.07501e-06	4.05001e-06	0.167274
1930	7.41289e-05	8.97396e-06	5.98264e-06	0.247096
1931	5.63552e-05	6.82229e-06	4.54819e-06	0.187851
1932	0.000137424	1.66364e-05	1.10909e-05	0.45808
1933	3.62397e-05	4.38714e-06	2.92476e-06	0.120799
1934	9.20014e-05	1.11376e-05	7.42505e-06	0.306671
1935	5.42102e-05	6.56262e-06	4.37508e-06	0.180701
1936	0.00018826	2.27906e-05	1.51937e-05	0.627535
1937	7.01198e-05	8.48862e-06	5.65908e-06	0.233733
1938	3.80408e-05	4.60518e-06	3.07012e-06	0.126803
1939	5.28229e-05	6.39468e-06	4.26312e-06	0.176076
1940	3.06983e-05	3.71631e-06	2.47754e-06	0.102328
1941	0.000111698	1.3522e-05	9.01469e-06	0.372327
1942	3.05211e-05	3.69485e-06	2.46323e-06	0.101737
1943	1.8853e-05	2.28233e-06	1.52155e-06	0.0628434
1944	4.67298e-05	5.65706e-06	3.77137e-06	0.155766
1945	6.74899e-05	8.17024e-06	5.44683e-06	0.224966
1946	4.22725e-05	5.11746e-06	3.41164e-06	0.140908
1947	7.60837e-05	9.21061e-06	6.1404e-06	0.253612
1948	3.75305e-05	4.5434e-06	3.02893e-06	0.125102
1949	4.43869e-05	5.37342e-06	3.58228e-06	0.147956
1950	8.11756e-05	9.82702e-06	6.55135e-06	0.270585
1951	6.77112e-05	8.19704e-06	5.4647e-06	0.225704
1952	7.47248e-05	9.04609e-06	6.03073e-06	0.249083
1953	7.30391e-05	8.84203e-06	5.89469e-06	0.243464
1954	7.2939e-05	8.82991e-06	5.88661e-06	0.24313
1955	5.64611e-05	6.83512e-06	4.55675e-06	0.188204
1956	4.01137e-05	4.85612e-06	3.23741e-06	0.133712
1957	4.88624e-05	5.91523e-06	3.94348e-06	0.162875
1958	5.48404e-05	6.63891e-06	4.42594e-06	0.182801
1959	8.57571e-05	1.03817e-05	6.9211e-06	0.285857
1960	5.45682e-05	6.60596e-06	4.40397e-06	0.181894
1961	6.94094e-05	8.40262e-06	5.60175e-06	0.231365
1962	3.74288e-05	4.53109e-06	3.02073e-06	0.124763
1963	5.25117e-05	6.35701e-06	4.23801e-06	0.175039
1964	6.08753e-05	7.36949e-06	4.91299e-06	0.202918
1965	5.29204e-05	6.40648e-06	4.27099e-06	0.176401
1966	6.70846e-05	8.12118e-06	5.41412e-06	0.223615
1967	5.45164e-05	6.59969e-06	4.39979e-06	0.181721
1968	5.18303e-05	6.27452e-06	4.18301e-06	0.172768
1969	3.59466e-05	4.35165e-06	2.9011e-06	0.119822
1970	8.46093e-05	1.02427e-05	6.82847e-06	0.282031
1971	0.000111285	1.3472e-05	8.98135e-06	0.37095
1972	0.000102535	1.24128e-05	8.27517e-06	0.341783
1973	5.70837e-05	6.91048e-06	4.60699e-06	0.190279
1974	6.35544e-05	7.69382e-06	5.12921e-06	0.211848
1975	9.32421e-05	1.12878e-05	7.52518e-06	0.310807
1976	4.75796e-05	5.75993e-06	3.83995e-06	0.158599
1977	2.16324e-05	2.6188e-06	1.74586e-06	0.0721081
1978	6.02604e-05	7.29506e-06	4.86337e-06	0.200868
1979	4.50184e-05	5.44987e-06	3.63325e-06	0.150061
1980	3.9248e-05	4.75132e-06	3.16755e-06	0.130827
1981	5.96202e-05	7.21756e-06	4.8117e-06	0.198734
1982	6.88336e-05	8.33292e-06	5.55528e-06	0.229445
1983	5.34849e-05	6.47482e-06	4.31655e-06	0.178283
1984	5.03664e-05	6.0973e-06	4.06486e-06	0.167888
1985	2.91089e-05	3.52388e-06	2.34926e-06	0.0970295
1986	2.97722e-05	3.60418e-06	2.40279e-06	0.0992406
1987	6.13242e-05	7.42384e-06	4.94923e-06	0.204414
1988	7.49896e-05	9.07815e-06	6.0521e-06	0.249965
1989	1.93042e-05	2.33695e-06	1.55797e-06	0.0643475
1990	4.53719e-05	5.49267e-06	3.66178e-06	0.15124
1991	3.59655e-05	4.35394e-06	2.90262e-06	0.119885
1992	0.000107599	1.30258e-05	8.68387e-06	0.358663
1993	8.96875e-05	1.08575e-05	7.23831e-06	0.298958
1994	7.35644e-05	8.90562e-06	5.93708e-06	0.245215
1995	6.54383e-05	7.92189e-06	5.28126e-06	0.218128
1996	7.16768e-05	8.67711e-06	5.78474e-06	0.238923
1997	2.94562e-05	3.56593e-06	2.37729e-06	0.0981873
1998	4.81141e-05	5.82463e-06	3.88309e-06	0.16038
1999	0.000114478	1.38586e-05	9.23908e-06	0.381595
[truncated: 8,001 more rows]
