# Supplementary material for: Health risk assessment from habitants of Araró, Michoacán, México, exposed to arsenic by dust, using Monte Carlo probabilistic method
Source: PeerJ. 2025 Jun 10;13:e18805. doi: 10.7717/peerj.18805 (PMC12164815; doi:10.7717/peerj.18805)
Supplement: Supplemental Information 9 [file peerj-13-18805-s009.xlsx]

## Sheet: Risk Premises
Study Title:	Premisas simulación ingestión.					Last simulation run:
Study File:	Premisas simulación ingestión.xlsx					2022-11-04 11:18:50
	Output Cells	Histogram settings				Multi-cell output range names
Description for Reports	Range Names	Min value	Max value	Step size		title row or column (optional)
	ADD	Auto	Auto	Auto
	ADDc	Auto	Auto	Auto
	CR	Auto	Auto	Auto
	HQ	Auto	Auto	Auto
		Study	Min				Max
	Input Cells	File	Allowed		Expected		Allowed
Description for Reports	Range Names	Values	Values	10/90	Values	90/10	Values	Distributions	Parameters and chart settings
	BW	31.3	15.2	22.8135	31.4763	40.1335	70.1	Normal	Mean	31.3	std dev	6.8625	X Axis Min	auto	X Axis Max	auto
	Cs	15.6	5.94	10.1171	15.7996	21.5085	42.53	Normal	Mean	15.6	std dev	4.57375	X Axis Min	auto	X Axis Max	auto
	ED	8.82	6	7.85888	8.82022	9.78155	12	Normal	Mean	8.82	std dev	0.75	X Axis Min	auto	X Axis Max	auto
	IR	100	50	76.2575	100.214	124.071	200	Normal	Mean	100	std dev	18.75	X Axis Min	auto	X Axis Max	auto

## Sheet: Simulation Summary
	10000	Simulations run
					Change in expected values as simulations increase									Change in standard deviation as simulations increase
	Minimum result	Maximum result	Expected value	Std deviation	125	250	500	1000	2000	4000	8000	10000		125	250	500	1000	2000	4000	8000	10000
ADD	9.59821e-06	0.00023542	5.2561e-05	2.22403e-05	-	0.0363686	0.0278301	0.00524865	-0.00724023	0.00712226	0.00234863	0.00150366		-	0.0763	0.0407188	0.0199866	0.0103597	-5.48397e-05	0.000596734	-0.00274073
ADDc	1.20937e-06	2.96629e-05	6.62269e-06	2.80228e-06	-	0.0363686	0.0278301	0.00524865	-0.00724023	0.00712226	0.00234863	0.00150366		-	0.0763	0.0407188	0.0199866	0.0103597	-5.48397e-05	0.000596734	-0.00274073
CR	8.0625e-07	1.97752e-05	4.41513e-06	1.86818e-06	-	0.0363686	0.0278301	0.00524865	-0.00724023	0.00712226	0.00234863	0.00150366		-	0.0763	0.0407188	0.0199866	0.0103597	-5.48397e-05	0.000596734	-0.00274073
HQ	0.031994	0.784732	0.175203	0.0741343	-	0.0363686	0.0278301	0.00524865	-0.00724023	0.00712226	0.00234863	0.00150366		-	0.0763	0.0407188	0.0199866	0.0103597	-5.48397e-05	0.000596734	-0.00274073

## Sheet: Simulation variance
This worksheet shows the convergence of the output variables as a function of the number of simulations
You should run enough simulations until the % change is very small, typically < 1.0%
ADD
	# of Sims	125	250	500	1000	2000	4000	8000	10000
	Avg Value	4.89054e-05	5.0684e-05	5.20946e-05	5.2368e-05	5.19889e-05	5.23591e-05	5.24821e-05	5.2561e-05
	% Chg		0.0363686	0.0278301	0.00524865	-0.00724023	0.00712226	0.00234863	0.00150366
	Std Dev.	1.9309e-05	2.07823e-05	2.16285e-05	2.20608e-05	2.22893e-05	2.22881e-05	2.23014e-05	2.22403e-05
	% Chg		0.0763	0.0407188	0.0199866	0.0103597	-5.48397e-05	0.000596734	-0.00274073
ADDc
	# of Sims	125	250	500	1000	2000	4000	8000	10000
	Avg Value	6.16208e-06	6.38619e-06	6.56392e-06	6.59837e-06	6.5506e-06	6.59725e-06	6.61275e-06	6.62269e-06
	% Chg		0.0363686	0.0278301	0.00524865	-0.00724023	0.00712226	0.00234863	0.00150366
	Std Dev.	2.43293e-06	2.61857e-06	2.72519e-06	2.77966e-06	2.80846e-06	2.8083e-06	2.80998e-06	2.80228e-06
	% Chg		0.0763	0.0407188	0.0199866	0.0103597	-5.48397e-05	0.000596734	-0.00274073
CR
	# of Sims	125	250	500	1000	2000	4000	8000	10000
	Avg Value	4.10806e-06	4.25746e-06	4.37595e-06	4.39891e-06	4.36706e-06	4.39817e-06	4.4085e-06	4.41513e-06
	% Chg		0.0363686	0.0278301	0.00524865	-0.00724023	0.00712226	0.00234863	0.00150366
	Std Dev.	1.62196e-06	1.74571e-06	1.81679e-06	1.85311e-06	1.8723e-06	1.8722e-06	1.87332e-06	1.86818e-06
	% Chg		0.0763	0.0407188	0.0199866	0.0103597	-5.48397e-05	0.000596734	-0.00274073
HQ
	# of Sims	125	250	500	1000	2000	4000	8000	10000
	Avg Value	0.163018	0.168947	0.173649	0.17456	0.173296	0.17453	0.17494	0.175203
	% Chg		0.0363686	0.0278301	0.00524865	-0.00724023	0.00712226	0.00234863	0.00150366
	Std Dev.	0.0643633	0.0692743	0.072095	0.073536	0.0742978	0.0742937	0.074338	0.0741343
	% Chg		0.0763	0.0407188	0.0199866	0.0103597	-5.48397e-05	0.000596734	-0.00274073

## Sheet: ADD Results
ADD Results
Minimum result	9.59821e-06				4.98403e-05	Study value
Maximum result	0.00023542				0.5172	of results are equal or lower
Expected value	5.2561e-05				0.4828	of results are equal or greater
Std Deviation	2.22403e-05
Out of 10000 simulations		Of those with numeric values:
10000 had numeric values.			5% <=	2.34285e-05
0 had error values.			10% <=	2.80047e-05
			15% <=	3.14141e-05
			20% <=	3.41296e-05
			25% <=	3.66855e-05
			30% <=	3.91848e-05
			35% <=	4.15978e-05
			40% <=	4.38128e-05
			45% <=	4.63996e-05
			50% <=	4.88696e-05
			55% <=	5.14773e-05
			60% <=	5.4335e-05
			65% <=	5.73266e-05
			70% <=	6.06141e-05
			75% <=	6.41679e-05
			80% <=	6.88897e-05
			85% <=	7.41837e-05
			90% <=	8.1475e-05
			95% <=	9.39024e-05
			100% <=	0.00023542
If ADD is:				4.98403e-05	0.5172	of results are equal or lower
(Chg to do what ifs)					0.4828	of results are greater
					Cumulative				Cumulative
ADD	frequency:				frequency:				frequency:
<=9.59821E-06	1	0.0001		<=9.59821E-06	1	0.0001		=>9.59821E-06	10000	1
9.59821E-06 to 2.14835E-05	334	0.0334		<=2.14835E-05	335	0.0335		=>2.14835E-05	9665	0.9665
2.14835E-05 to 3.33689E-05	1523	0.1523		<=3.33689E-05	1858	0.1858		=>3.33689E-05	8142	0.8142
3.33689E-05 to 4.52542E-05	2434	0.2434		<=4.52542E-05	4292	0.4292		=>4.52542E-05	5708	0.5708
4.52542E-05 to 5.71395E-05	2179	0.2179		<=5.71395E-05	6471	0.6471		=>5.71395E-05	3529	0.3529
5.71395E-05 to 6.90249E-05	1544	0.1544		<=6.90249E-05	8015	0.8015		=>6.90249E-05	1985	0.1985
6.90249E-05 to 8.09102E-05	955	0.0955		<=8.09102E-05	8970	0.897		=>8.09102E-05	1030	0.103
8.09102E-05 to 9.27956E-05	502	0.0502		<=9.27956E-05	9472	0.9472		=>9.27956E-05	528	0.0528
9.27956E-05 to 0.000104681	266	0.0266		<=0.000104681	9738	0.9738		=>0.000104681	262	0.0262
0.000104681 to 0.000116566	135	0.0135		<=0.000116566	9873	0.9873		=>0.000116566	127	0.0127
0.000116566 to 0.000128452	52	0.0052		<=0.000128452	9925	0.9925		=>0.000128452	75	0.0075
0.000128452 to 0.000140337	40	0.004		<=0.000140337	9965	0.9965		=>0.000140337	35	0.0035
0.000140337 to 0.000152222	17	0.0017		<=0.000152222	9982	0.9982		=>0.000152222	18	0.0018
0.000152222 to 0.000164108	10	0.001		<=0.000164108	9992	0.9992		=>0.000164108	8	0.0008
0.000164108 to 0.000175993	3	0.0003		<=0.000175993	9995	0.9995		=>0.000175993	5	0.0005
0.000175993 to 0.000187878	2	0.0002		<=0.000187878	9997	0.9997		=>0.000187878	3	0.0003
0.000187878 to 0.000199764	0	0		<=0.000199764	9997	0.9997		=>0.000199764	3	0.0003
0.000199764 to 0.000211649	0	0		<=0.000211649	9997	0.9997		=>0.000211649	3	0.0003
0.000211649 to 0.000223534	1	0.0001		<=0.000223534	9998	0.9998		=>0.000223534	2	0.0002
0.000223534 to 0.00023542	2	0.0002		<=0.00023542	10000	1		=>0.00023542	1	0.0001
>0.00023542	0	0
Bin Size	1.18853e-05
Number of bins	21
# of Sims	Avg Value	% Chg		Std Dev.	% Chg
125	4.89054e-05			1.9309e-05
250	5.0684e-05	0.0363686		2.07823e-05	0.0763
500	5.20946e-05	0.0278301		2.16285e-05	0.0407188
1000	5.2368e-05	0.00524865		2.20608e-05	0.0199866
2000	5.19889e-05	-0.00724023		2.22893e-05	0.0103597
4000	5.23591e-05	0.00712226		2.22881e-05	-5.48397e-05
8000	5.24821e-05	0.00234863		2.23014e-05	0.000596734
10000	5.2561e-05	0.00150366		2.22403e-05	-0.00274073

## Sheet: ADDc Results
ADDc Results
Minimum result	1.20937e-06				6.27987e-06	Study value
Maximum result	2.96629e-05				0.5172	of results are equal or lower
Expected value	6.62269e-06				0.4828	of results are equal or greater
Std Deviation	2.80228e-06
Out of 10000 simulations		Of those with numeric values:
10000 had numeric values.			5% <=	2.95199e-06
0 had error values.			10% <=	3.52859e-06
			15% <=	3.95818e-06
			20% <=	4.30032e-06
			25% <=	4.62237e-06
			30% <=	4.93729e-06
			35% <=	5.24133e-06
			40% <=	5.52041e-06
			45% <=	5.84635e-06
			50% <=	6.15757e-06
			55% <=	6.48613e-06
			60% <=	6.84621e-06
			65% <=	7.22315e-06
			70% <=	7.63737e-06
			75% <=	8.08515e-06
			80% <=	8.6801e-06
			85% <=	9.34715e-06
			90% <=	1.02658e-05
			95% <=	1.18317e-05
			100% <=	2.96629e-05
If ADDc is:				6.27987e-06	0.5172	of results are equal or lower
(Chg to do what ifs)					0.4828	of results are greater
					Cumulative				Cumulative
ADDc	frequency:				frequency:				frequency:
<=1.20937E-06	1	0.0001		<=1.20937E-06	1	0.0001		=>1.20937E-06	10000	1
1.20937E-06 to 2.70693E-06	334	0.0334		<=2.70693E-06	335	0.0335		=>2.70693E-06	9665	0.9665
2.70693E-06 to 4.20448E-06	1523	0.1523		<=4.20448E-06	1858	0.1858		=>4.20448E-06	8142	0.8142
4.20448E-06 to 5.70203E-06	2434	0.2434		<=5.70203E-06	4292	0.4292		=>5.70203E-06	5708	0.5708
5.70203E-06 to 7.19958E-06	2179	0.2179		<=7.19958E-06	6471	0.6471		=>7.19958E-06	3529	0.3529
7.19958E-06 to 8.69714E-06	1544	0.1544		<=8.69714E-06	8015	0.8015		=>8.69714E-06	1985	0.1985
8.69714E-06 to 1.01947E-05	955	0.0955		<=1.01947E-05	8970	0.897		=>1.01947E-05	1030	0.103
1.01947E-05 to 1.16922E-05	502	0.0502		<=1.16922E-05	9472	0.9472		=>1.16922E-05	528	0.0528
1.16922E-05 to 1.31898E-05	266	0.0266		<=1.31898E-05	9738	0.9738		=>1.31898E-05	262	0.0262
1.31898E-05 to 1.46873E-05	135	0.0135		<=1.46873E-05	9873	0.9873		=>1.46873E-05	127	0.0127
1.46873E-05 to 1.61849E-05	52	0.0052		<=1.61849E-05	9925	0.9925		=>1.61849E-05	75	0.0075
1.61849E-05 to 1.76824E-05	40	0.004		<=1.76824E-05	9965	0.9965		=>1.76824E-05	35	0.0035
1.76824E-05 to 1.918E-05	17	0.0017		<=1.918E-05	9982	0.9982		=>1.918E-05	18	0.0018
1.918E-05 to 2.06776E-05	10	0.001		<=2.06776E-05	9992	0.9992		=>2.06776E-05	8	0.0008
2.06776E-05 to 2.21751E-05	3	0.0003		<=2.21751E-05	9995	0.9995		=>2.21751E-05	5	0.0005
2.21751E-05 to 2.36727E-05	2	0.0002		<=2.36727E-05	9997	0.9997		=>2.36727E-05	3	0.0003
2.36727E-05 to 2.51702E-05	0	0		<=2.51702E-05	9997	0.9997		=>2.51702E-05	3	0.0003
2.51702E-05 to 2.66678E-05	0	0		<=2.66678E-05	9997	0.9997		=>2.66678E-05	3	0.0003
2.66678E-05 to 2.81653E-05	1	0.0001		<=2.81653E-05	9998	0.9998		=>2.81653E-05	2	0.0002
2.81653E-05 to 2.96629E-05	2	0.0002		<=2.96629E-05	10000	1		=>2.96629E-05	1	0.0001
>2.96629E-05	0	0
Bin Size	1.49755e-06
Number of bins	21
# of Sims	Avg Value	% Chg		Std Dev.	% Chg
125	6.16208e-06			2.43293e-06
250	6.38619e-06	0.0363686		2.61857e-06	0.0763
500	6.56392e-06	0.0278301		2.72519e-06	0.0407188
1000	6.59837e-06	0.00524865		2.77966e-06	0.0199866
2000	6.5506e-06	-0.00724023		2.80846e-06	0.0103597
4000	6.59725e-06	0.00712226		2.8083e-06	-5.48397e-05
8000	6.61275e-06	0.00234863		2.80998e-06	0.000596734
10000	6.62269e-06	0.00150366		2.80228e-06	-0.00274073

## Sheet: CR Results
CR Results
Minimum result	8.0625e-07				4.18658e-06	Study value
Maximum result	1.97752e-05				0.5172	of results are equal or lower
Expected value	4.41513e-06				0.4828	of results are equal or greater
Std Deviation	1.86818e-06
Out of 10000 simulations		Of those with numeric values:
10000 had numeric values.			5% <=	1.96799e-06
0 had error values.			10% <=	2.3524e-06
			15% <=	2.63879e-06
			20% <=	2.86688e-06
			25% <=	3.08158e-06
			30% <=	3.29153e-06
			35% <=	3.49422e-06
			40% <=	3.68027e-06
			45% <=	3.89757e-06
			50% <=	4.10505e-06
			55% <=	4.32409e-06
			60% <=	4.56414e-06
			65% <=	4.81543e-06
			70% <=	5.09158e-06
			75% <=	5.3901e-06
			80% <=	5.78674e-06
			85% <=	6.23143e-06
			90% <=	6.8439e-06
			95% <=	7.8878e-06
			100% <=	1.97752e-05
If CR is:				4.18658e-06	0.5172	of results are equal or lower
(Chg to do what ifs)					0.4828	of results are greater
					Cumulative				Cumulative
CR	frequency:				frequency:				frequency:
<=8.0625E-07	1	0.0001		<=8.0625E-07	1	0.0001		=>8.0625E-07	10000	1
8.0625E-07 to 1.80462E-06	334	0.0334		<=1.80462E-06	335	0.0335		=>1.80462E-06	9665	0.9665
1.80462E-06 to 2.80299E-06	1523	0.1523		<=2.80299E-06	1858	0.1858		=>2.80299E-06	8142	0.8142
2.80299E-06 to 3.80135E-06	2434	0.2434		<=3.80135E-06	4292	0.4292		=>3.80135E-06	5708	0.5708
3.80135E-06 to 4.79972E-06	2179	0.2179		<=4.79972E-06	6471	0.6471		=>4.79972E-06	3529	0.3529
4.79972E-06 to 5.79809E-06	1544	0.1544		<=5.79809E-06	8015	0.8015		=>5.79809E-06	1985	0.1985
5.79809E-06 to 6.79646E-06	955	0.0955		<=6.79646E-06	8970	0.897		=>6.79646E-06	1030	0.103
6.79646E-06 to 7.79483E-06	502	0.0502		<=7.79483E-06	9472	0.9472		=>7.79483E-06	528	0.0528
7.79483E-06 to 8.79319E-06	266	0.0266		<=8.79319E-06	9738	0.9738		=>8.79319E-06	262	0.0262
8.79319E-06 to 9.79156E-06	135	0.0135		<=9.79156E-06	9873	0.9873		=>9.79156E-06	127	0.0127
9.79156E-06 to 1.07899E-05	52	0.0052		<=1.07899E-05	9925	0.9925		=>1.07899E-05	75	0.0075
1.07899E-05 to 1.17883E-05	40	0.004		<=1.17883E-05	9965	0.9965		=>1.17883E-05	35	0.0035
1.17883E-05 to 1.27867E-05	17	0.0017		<=1.27867E-05	9982	0.9982		=>1.27867E-05	18	0.0018
1.27867E-05 to 1.3785E-05	10	0.001		<=1.3785E-05	9992	0.9992		=>1.3785E-05	8	0.0008
1.3785E-05 to 1.47834E-05	3	0.0003		<=1.47834E-05	9995	0.9995		=>1.47834E-05	5	0.0005
1.47834E-05 to 1.57818E-05	2	0.0002		<=1.57818E-05	9997	0.9997		=>1.57818E-05	3	0.0003
1.57818E-05 to 1.67801E-05	0	0		<=1.67801E-05	9997	0.9997		=>1.67801E-05	3	0.0003
1.67801E-05 to 1.77785E-05	0	0		<=1.77785E-05	9997	0.9997		=>1.77785E-05	3	0.0003
1.77785E-05 to 1.87769E-05	1	0.0001		<=1.87769E-05	9998	0.9998		=>1.87769E-05	2	0.0002
1.87769E-05 to 1.97752E-05	2	0.0002		<=1.97752E-05	10000	1		=>1.97752E-05	1	0.0001
>1.97752E-05	0	0
Bin Size	9.98368e-07
Number of bins	21
# of Sims	Avg Value	% Chg		Std Dev.	% Chg
125	4.10806e-06			1.62196e-06
250	4.25746e-06	0.0363686		1.74571e-06	0.0763
500	4.37595e-06	0.0278301		1.81679e-06	0.0407188
1000	4.39891e-06	0.00524865		1.85311e-06	0.0199866
2000	4.36706e-06	-0.00724023		1.8723e-06	0.0103597
4000	4.39817e-06	0.00712226		1.8722e-06	-5.48397e-05
8000	4.4085e-06	0.00234863		1.87332e-06	0.000596734
10000	4.41513e-06	0.00150366		1.86818e-06	-0.00274073

## Sheet: HQ Results
HQ Results
Minimum result	0.031994				0.166134	Study value
Maximum result	0.784732				0.5172	of results are equal or lower
Expected value	0.175203				0.4828	of results are equal or greater
Std Deviation	0.0741343
Out of 10000 simulations		Of those with numeric values:
10000 had numeric values.			5% <=	0.078095
0 had error values.			10% <=	0.093349
			15% <=	0.104714
			20% <=	0.113765
			25% <=	0.122285
			30% <=	0.130616
			35% <=	0.138659
			40% <=	0.146043
			45% <=	0.154665
			50% <=	0.162899
			55% <=	0.171591
			60% <=	0.181117
			65% <=	0.191089
			70% <=	0.202047
			75% <=	0.213893
			80% <=	0.229632
			85% <=	0.247279
			90% <=	0.271583
			95% <=	0.313008
			100% <=	0.784732
If HQ is:				0.166134	0.5172	of results are equal or lower
(Chg to do what ifs)					0.4828	of results are greater
					Cumulative				Cumulative
HQ	frequency:				frequency:				frequency:
<=0.031994043	1	0.0001		<=0.031994043	1	0.0001		=>0.031994043	10000	1
0.031994043 to 0.071611824	334	0.0334		<=0.071611824	335	0.0335		=>0.071611824	9665	0.9665
0.071611824 to 0.111229604	1523	0.1523		<=0.111229604	1858	0.1858		=>0.111229604	8142	0.8142
0.111229604 to 0.150847384	2434	0.2434		<=0.150847384	4292	0.4292		=>0.150847384	5708	0.5708
0.150847384 to 0.190465164	2179	0.2179		<=0.190465164	6471	0.6471		=>0.190465164	3529	0.3529
0.190465164 to 0.230082944	1544	0.1544		<=0.230082944	8015	0.8015		=>0.230082944	1985	0.1985
0.230082944 to 0.269700724	955	0.0955		<=0.269700724	8970	0.897		=>0.269700724	1030	0.103
0.269700724 to 0.309318505	502	0.0502		<=0.309318505	9472	0.9472		=>0.309318505	528	0.0528
0.309318505 to 0.348936285	266	0.0266		<=0.348936285	9738	0.9738		=>0.348936285	262	0.0262
0.348936285 to 0.388554065	135	0.0135		<=0.388554065	9873	0.9873		=>0.388554065	127	0.0127
0.388554065 to 0.428171845	52	0.0052		<=0.428171845	9925	0.9925		=>0.428171845	75	0.0075
0.428171845 to 0.467789625	40	0.004		<=0.467789625	9965	0.9965		=>0.467789625	35	0.0035
0.467789625 to 0.507407405	17	0.0017		<=0.507407405	9982	0.9982		=>0.507407405	18	0.0018
0.507407405 to 0.547025186	10	0.001		<=0.547025186	9992	0.9992		=>0.547025186	8	0.0008
0.547025186 to 0.586642966	3	0.0003		<=0.586642966	9995	0.9995		=>0.586642966	5	0.0005
0.586642966 to 0.626260746	2	0.0002		<=0.626260746	9997	0.9997		=>0.626260746	3	0.0003
0.626260746 to 0.665878526	0	0		<=0.665878526	9997	0.9997		=>0.665878526	3	0.0003
0.665878526 to 0.705496306	0	0		<=0.705496306	9997	0.9997		=>0.705496306	3	0.0003
0.705496306 to 0.745114086	1	0.0001		<=0.745114086	9998	0.9998		=>0.745114086	2	0.0002
0.745114086 to 0.784731866	2	0.0002		<=0.784731866	10000	1		=>0.784731866	1	0.0001
>0.784731866	0	0
Bin Size	0.0396178
Number of bins	21
# of Sims	Avg Value	% Chg		Std Dev.	% Chg
125	0.163018			0.0643633
250	0.168947	0.0363686		0.0692743	0.0763
500	0.173649	0.0278301		0.072095	0.0407188
1000	0.17456	0.00524865		0.073536	0.0199866
2000	0.173296	-0.00724023		0.0742978	0.0103597
4000	0.17453	0.00712226		0.0742937	-5.48397e-05
8000	0.17494	0.00234863		0.074338	0.000596734
10000	0.175203	0.00150366		0.0741343	-0.00274073

## Sheet: Simulation Input Values 1
Sim #	BW	Cs	ED	IR
1	37.8828	21.6276	8.21807	80.1427
2	31.0638	24.3237	8.11308	65.7605
3	35.8193	17.584	9.86944	102.01
4	26.1533	15.0072	8.04158	94.4485
5	28.7767	13.8489	9.49383	100.758
6	37.5444	17.1908	8.18021	125.434
7	26.8532	17.7236	8.26796	103.467
8	26.3906	9.97007	7.81582	115.323
9	30.1533	11.7937	7.11006	108.552
10	22.4342	15.8383	8.57432	124.117
11	36.049	19.4806	7.25906	111.954
12	24.4174	9.78411	9.59059	90.9288
13	31.0994	11.4839	9.06986	78.6894
14	37.4116	11.0744	7.8231	116.822
15	36.7588	14.2604	8.28961	81.8013
16	33.0779	16.5978	9.9987	94.6876
17	25.4359	12.7675	9.33798	106.028
18	34.9489	13.7446	6.68024	111.043
19	24.279	6.64676	7.86286	86.4864
20	30.1465	24.4203	8.01673	110.218
21	31.0186	17.6966	9.25087	82.434
22	36.0117	9.73217	10.8788	128.815
23	40.3037	16.4133	7.65008	103.595
24	36.2438	22.0938	8.75927	84.9834
25	31.7446	21.0463	7.8535	63.8012
26	25.6598	18.2409	8.243	64.428
27	28.5431	10.197	9.51255	71.7889
28	43.2204	13.7597	8.15731	75.2427
29	35.9014	16.8766	9.28383	109.14
30	32.0938	18.4428	7.70368	116.577
31	17.2059	13.7894	9.5507	106.216
32	29.5237	19.8534	9.43468	117.754
33	37.8397	17.979	9.8216	100.636
34	41.379	11.4812	8.53625	111.73
35	38.8368	20.1188	8.3407	106.764
36	31.2111	10.7259	6.84684	109.289
37	36.2604	13.5975	9.20679	75.5721
38	28.5036	15.1657	10.2093	101.758
39	31.4084	18.7733	10.2796	76.4975
40	27.5969	11.1713	9.14213	100.452
41	39.6738	11.9215	8.43627	101.538
42	26.8081	7.96921	8.25187	111.501
43	19.4439	19.5509	9.60483	94.5497
44	35.0521	11.1042	10.2426	110.553
45	41.1049	11.2384	8.27929	90.7504
46	25.7147	13.6482	9.97404	120.555
47	37.5497	22.936	7.34626	75.5398
48	39.8641	17.386	8.55158	137.236
49	38.1733	13.0868	8.29976	82.054
50	45.6009	24.0846	8.12051	111.955
51	30.1631	14.2215	9.66569	75.9101
52	26.9617	14.4801	8.86711	85.8448
53	38.9093	21.6282	8.49789	75.5406
54	33.2565	20.1939	8.32139	95.482
55	35.6303	16.4179	7.2449	100.43
56	30.9018	14.8684	8.64351	106.471
57	30.778	16.7221	9.34705	91.7263
58	29.3009	9.78843	9.29611	81.6815
59	37.6277	12.0818	8.52378	109.216
60	30.3303	6.29529	8.18186	106.313
61	29.1079	11.6739	7.32573	93.1772
62	38.0169	10.6854	8.71499	103.183
63	19.2197	13.0467	10.4453	87.3914
64	28.1793	17.6922	8.50611	123.139
65	32.2308	19.1873	9.70319	126.307
66	35.9202	16.8185	8.70828	95.9699
67	46.3614	25.0281	8.45261	70.6871
68	31.8081	11.2732	8.85661	92.2428
69	26.2315	17.9154	8.5001	81.4251
70	29.3418	7.74915	9.34394	100.452
71	36.0154	23.4546	8.25783	110.849
72	31.7778	17.7888	8.04903	121.638
73	31.4307	17.2406	9.58479	93.0409
74	33.6461	19.7425	9.76531	110.263
75	28.0186	19.4258	7.92837	115.913
76	15.9998	6.42354	9.3366	85.1148
77	20.4807	13.2031	9.96923	120.924
78	35.6694	16.5289	8.59409	127.467
79	33.4722	23.9213	8.5183	129.133
80	24.0989	24.684	9.51501	85.2901
81	30.0061	8.8106	7.18991	99.23
82	28.5518	14.4231	7.18313	113.795
83	39.5316	20.0923	9.37294	101.999
84	34.8918	12.3329	8.38962	76.6607
85	42.1441	23.1315	7.69692	86.6333
86	28.6187	16.6157	9.58378	73.2939
87	32.2525	7.68308	8.83475	88.5007
88	34.7094	18.6404	8.44933	93.1295
89	25.3436	11.7186	8.49494	96.0193
90	39.8338	18.1991	8.12209	130.94
91	28.5128	15.1255	9.88409	65.3238
92	29.3583	17.9464	8.49281	109.311
93	28.0197	13.1858	8.9194	93.9971
94	32.9764	16.2465	9.29517	84.4349
95	25.9256	17.0612	10.5562	90.9144
96	31.7532	6.30748	7.76102	98.4138
97	20.5685	18.0615	8.69431	96.9939
98	27.6722	19.2412	7.44771	92.5198
99	34.798	15.3823	8.91892	86.5155
100	41.3869	13.2754	9.31608	124.485
101	30.0857	16.0425	7.8295	136.236
102	23.8114	22.0036	9.18911	85.8082
103	31.6774	16.7873	8.59223	82.4193
104	38.2972	13.9698	8.08482	124.269
105	34.5627	7.50479	9.49921	78.8884
106	34.511	12.5681	9.45017	102.31
107	32.6298	13.8717	8.59974	95.1584
108	30.7538	16.9042	7.61854	89.7557
109	28.1248	17.9012	8.01304	90.2241
110	35.7659	13.7277	9.24395	88.8158
111	46.8941	13.7803	9.26623	96.5622
112	26.3932	18.484	8.614	81.1033
113	22.5356	12.3607	9.59446	78.9473
114	29.4005	25.2271	7.40589	105.275
115	23.7545	14.9501	9.47718	65.0527
116	38.2531	17.4534	8.62563	117.695
117	17.684	17.5762	10.3162	100.646
118	42.0974	12.1922	8.99868	57.7279
119	33.9005	18.837	8.42906	86.1083
120	26.2598	16.2043	8.90505	122.62
121	28.5486	11.9765	9.47771	104.487
122	43.5149	14.1933	8.82962	83.29
123	29.6141	17.4801	7.89557	89.7017
124	32.8468	20.2865	8.92677	81.755
125	32.4495	14.0646	9.7109	113.713
126	27.057	25.7045	7.90105	74.9507
127	31.8282	18.7413	8.6164	111.879
128	28.8292	12.0244	8.63928	112.451
129	30.3401	20.7249	10.3694	108.651
130	41.2174	20.3508	6.9833	127.986
131	29.7326	21.6477	8.94028	92.0156
132	26.3077	16.619	8.45314	133.362
133	45.6478	18.038	8.00628	85.4697
134	26.7073	6.41572	7.53689	81.9436
135	34.2971	12.2502	8.38528	76.5813
136	24.2681	10.5748	9.33058	94.9831
137	30.1326	9.97981	9.09462	101.721
138	37.381	19.4915	8.46307	100.209
139	25.2023	9.52864	8.7358	91.1523
140	27.8715	13.0199	8.71877	121.572
141	27.7111	16.4855	7.38036	63.0613
142	29.9823	18.5715	8.12012	123.955
143	22.2406	9.76187	8.30593	99.6554
144	23.9673	18.1997	8.56712	99.3405
145	28.4645	20.2019	7.75537	91.61
146	24.2752	17.2587	8.2309	102.8
147	36.2933	10.2577	7.684	95.1452
148	28.5824	13.8136	9.30177	102.801
149	32.2332	21.3606	9.53349	92.2487
150	28.0141	16.1965	8.39817	129.41
151	38.0006	12.7549	8.9535	69.7913
152	38.7233	13.972	7.45164	108.627
153	25.4616	24.5462	8.94623	84.625
154	30.945	19.0365	8.79268	112.834
155	24.9995	21.4839	9.15786	111.455
156	39.2556	11.4055	10.2739	108.337
157	36.4552	16.374	9.52292	91.2913
158	30.6008	20.5011	8.07242	131.022
159	41.258	17.1953	8.88518	129.933
160	38.0407	15.3668	8.87907	105.959
161	19.027	14.5785	8.61244	91.7171
162	28.14	16.8234	9.80947	112.187
163	30.5501	13.6736	8.93936	98.5589
164	30.1292	11.535	9.9251	120.967
165	47.4519	15.5584	8.42219	78.4462
166	29.2986	8.73881	8.96032	103.96
167	29.5223	10.1198	8.66812	91.3671
168	33.1097	15.3423	9.09142	140.425
169	39.6878	8.47678	9.54039	119.692
170	25.8584	16.0921	8.33822	83.017
171	33.5674	13.6573	7.18028	114.105
172	32.0517	19.0835	8.60822	116.138
173	26.3695	16.6391	8.87122	124.903
174	33.4842	16.5747	8.45333	99.8043
175	27.3075	16.8816	8.8337	92.4314
176	34.7518	18.8424	8.02633	95.8698
177	36.733	19.8776	8.10415	128.233
178	34.5974	26.6579	8.4865	111.524
179	35.4932	19.5019	8.44511	115.759
180	35.7598	13.9014	7.98363	79.6652
181	32.0166	18.7413	9.43756	117.576
182	35.0858	19.7356	8.05999	92.4615
183	33.1371	6.81409	7.75835	81.5782
184	33.6468	18.4826	9.51723	103.119
185	36.0964	16.9293	9.18594	111.367
186	27.0074	13.9575	9.74634	67.719
187	36.7777	17.3147	9.27293	109.968
188	32.3191	13.5661	9.99643	101.214
189	41.8554	21.3271	8.59499	65.9676
190	24.757	11.2551	9.71804	114.724
191	29.6429	12.8354	8.65805	128.833
192	43.2471	19.5911	8.74234	76.0112
193	38.0226	13.6311	9.13895	94.8154
194	31.1094	8.15467	9.28312	114.146
195	37.9943	18.9878	8.91619	106.66
196	31.7406	9.80019	9.00572	105.816
197	30.554	21.9852	8.95254	109.367
198	31.962	8.19278	8.38428	98.6909
199	35.0732	12.5551	9.44248	117.49
200	25.5187	14.2691	9.53965	108.355
201	20.2048	21.1784	8.598	73.6518
202	39.5415	15.3077	9.06759	103.942
203	40.2458	9.25669	7.66492	113.531
204	24.835	9.28787	9.70924	74.0566
205	23.5378	18.4287	9.08938	131.139
206	28.5701	20.7111	7.95844	71.6147
207	32.151	20.8322	8.83188	138.11
208	39.6058	20.8152	9.26326	128.741
209	30.2422	11.5239	7.95816	130.98
210	46.3136	7.2662	8.56365	78.3843
211	17.7643	15.4728	8.89633	86.5551
212	18.6569	17.7225	8.96352	103.136
213	46.3997	12.3788	9.67815	135.813
214	23.3158	6.52631	8.18816	85.4375
215	43.1223	7.68099	9.51966	102.709
216	32.1945	17.7	9.84523	102.474
217	17.8475	10.5083	8.10689	81.3289
218	28.1248	10.5996	9.26501	69.971
219	26.1844	21.3415	8.35712	84.9306
220	33.6822	13.1142	8.74526	111.353
221	20.5885	13.8525	8.9176	124.969
222	29.5699	22.2003	8.39437	104.236
223	43.6988	17.5249	7.43801	110.72
224	35.4191	11.8134	8.15302	82.383
225	38.2067	17.1679	9.45564	120.509
226	29.9983	11.5765	8.78691	64.7168
227	32.097	11.8834	8.871	118.906
228	31.5316	13.6398	8.46222	85.7079
229	29.1993	24.1914	10.0967	126.046
230	35.1197	24.9889	8.08287	118.141
231	33.0705	17.2893	8.65313	105.317
232	41.9738	20.5398	8.47385	97.9899
233	41.1189	16.7189	8.42433	85.3253
234	37.7365	16.7304	8.67654	110.193
235	15.3873	13.6368	9.00501	89.6572
236	25.4522	11.8656	9.90602	110.311
237	45.2286	14.0409	8.06	104.047
238	32.9189	16.9251	9.02339	124.068
239	39.7511	12.4227	8.62965	111.256
240	20.1053	9.772	7.65083	90.103
241	41.2552	22.8634	8.58643	70.2481
242	36.3175	13.588	9.30492	107.285
243	24.9795	18.8415	9.23244	85.3842
244	28.0641	8.85517	9.57021	122.766
245	28.7715	8.70627	9.39487	102.582
246	24.7959	14.675	8.94501	123.154
247	27.8956	19.5974	8.28326	105.454
248	25.1362	13.2726	9.08196	159.843
249	31.8196	5.98635	8.82319	107.088
250	22.7321	25.1119	9.42312	100.019
251	33.9148	13.1798	8.32404	76.7022
252	21.4177	15.9417	8.37613	79.5399
253	41.7764	13.6476	10.0016	80.5912
254	23.2824	13.9817	8.56623	105.073
255	37.2559	14.3122	8.38219	79.4915
256	34.2352	18.2097	9.58052	70.2789
257	27.9696	19.4805	9.31421	78.8952
258	17.0095	11.0337	8.8347	104.225
259	33.9404	15.5022	7.78146	95.0482
260	39.441	9.36267	9.15364	113.233
261	33.943	15.0764	9.46214	124.387
262	38.3727	12.081	9.14413	73.2499
263	27.4872	12.7345	9.1789	117.517
264	40.124	10.0824	8.51111	100.075
265	25.1082	16.4939	8.34673	66.2976
266	40.5902	17.2976	8.91937	130.594
267	22.0531	17.0135	8.53428	105.511
268	24.094	15.8415	9.17511	114.838
269	29.6074	18.0804	8.85656	92.5234
270	36.1423	19.1075	7.94391	91.9281
271	34.1697	18.2552	9.0214	84.8356
272	27.6286	12.9427	9.39747	93.5733
273	19.7099	17.0665	8.22778	123.653
274	25.3384	12.0611	8.97191	105.243
275	39.0963	24.1528	8.23096	90.0323
276	27.1972	16.9397	10.17	87.1315
277	22.5371	14.098	8.30188	53.6701
278	26.9065	19.7131	8.60338	95.6187
279	37.9038	7.10324	8.19392	117.272
280	26.8544	28.4092	9.50168	108.803
281	37.2356	12.1904	9.33504	86.8977
282	27.0137	17.5453	8.30637	104.986
283	40.3102	19.7247	9.54399	136.071
284	34.3733	10.8601	8.11631	82.3259
285	33.9599	18.4165	7.99785	96.1981
286	36.1158	10.0876	7.93264	91.788
287	35.0053	15.4151	9.06553	83.7291
288	25.368	7.87341	7.9134	98.9217
289	29.0633	17.5545	7.48234	104.998
290	31.9754	18.8522	8.21089	133.755
291	22.3168	14.9572	8.54704	82.314
292	35.8596	21.6425	10.212	104.602
293	43.2296	8.72839	8.53235	77.498
294	34.107	15.0784	10.2735	79.2234
295	25.2331	13.9273	7.51786	119.78
296	31.437	11.8519	8.47089	114.89
297	33.9293	12.0578	8.24405	100.749
298	29.8792	13.0838	7.944	110.877
299	28.6162	10.5246	10.0378	96.6287
300	40.2128	17.5703	6.75622	102.332
301	41.4955	17.4751	7.53714	105.933
302	28.9814	16.9809	9.02663	119.313
303	25.203	22.4573	9.00428	92.1291
304	33.1747	12.6678	7.84508	106.721
305	32.0512	11.2527	8.74876	100.288
306	27.8729	7.30418	9.0931	124.144
307	32.501	11.1638	9.34629	88.6053
308	32.1227	11.928	9.95196	71.1397
309	30.857	19.2885	8.57414	98.9769
310	27.5388	14.2916	9.16906	100.268
311	33.1827	15.5146	8.72935	82.3418
312	40.0547	26.2844	7.84891	72.1899
313	43.4479	19.4737	9.85496	76.6916
314	33.3553	19.0393	8.68151	101.945
315	34.2491	19.8354	10.0292	86.3392
316	21.9798	13.4743	8.66625	81.7593
317	31.1971	18.5497	8.80255	84.7848
318	38.0469	16.0843	9.57161	79.4725
319	28.7923	13.421	9.35474	123.302
320	36.7914	11.3445	10.3554	76.4649
321	37.3158	14.3492	9.30163	119.397
322	35.9536	13.0647	7.98068	108.304
323	32.0695	14.2632	9.14577	118.975
324	41.3133	19.1009	7.90966	123.105
325	39.9722	19.3177	8.92833	92.5885
326	29.7428	20.6275	9.33259	114.041
327	28.4942	17.834	9.17881	64.2175
328	34.54	16.7522	8.62808	114.373
329	48.4745	12.1367	7.80827	88.2405
330	23.073	14.0003	8.65467	91.3127
331	22.9092	10.5351	7.7617	106.533
332	30.8789	13.9984	9.15309	88.532
333	32.843	12.1489	9.27484	96.3493
334	29.8634	10.5473	7.70388	97.4359
335	30.7165	21.0962	8.57783	76.9878
336	46.2595	7.6775	7.12611	78.0769
337	29.9224	16.5162	7.9373	122.54
338	23.112	19.0696	9.90843	101.132
339	27.1111	13.8513	8.50283	79.7784
340	23.7888	20.493	9.33144	91.9854
341	30.8977	13.4864	8.06911	135.068
342	26.9698	10.5518	8.71563	83.2497
343	33.7239	11.6146	10.4904	108.213
344	22.7275	12.9863	8.7725	81.6912
345	49.3578	18.518	10.5297	86.818
346	24.496	13.3192	8.4889	90.6933
347	41.4849	13.4278	9.00121	122.798
348	28.0513	7.74041	7.10659	77.4668
349	30.7162	14.0011	6.89336	100.798
350	28.7904	17.3138	8.89156	63.229
351	36.2205	21.166	9.17286	86.6248
352	30.4226	9.9254	8.7137	129.053
353	33.5043	25.2266	9.60426	120.556
354	34.028	18.5944	8.37706	110.38
355	50.9733	13.387	7.15428	95.7441
356	30.0037	17.9984	7.87657	106.833
357	30.6737	17.1236	8.67691	104.611
358	22.6272	15.0194	6.86922	147.279
359	35.8903	12.5972	9.03249	92.6027
360	29.9428	13.1146	8.96164	98.9304
361	25.94	16.6746	9.65159	89.3015
362	38.7506	14.7558	9.34032	94.1482
363	33.4476	18.6218	8.28631	120.638
364	33.2223	17.8386	10.0416	94.0496
365	29.6449	16.4341	9.30482	124.893
366	28.2131	15.6095	7.95636	99.9527
367	32.61	22.5212	8.87063	96.669
368	33.4558	15.8839	9.47658	108.572
369	38.4456	11.5376	7.4522	105.505
370	30.3132	14.8378	8.78068	137.087
371	31.7209	23.0773	9.79702	67.688
372	32.2499	14.653	7.67973	76.7905
373	43.9417	16.8224	8.78209	82.6672
374	20.5183	17.775	8.72194	126.585
375	23.5468	19.5703	8.44814	121.94
376	39.3022	23.0992	10.1973	124.996
377	19.1497	24.2933	9.09818	123.519
378	27.091	23.3438	9.8272	109.823
379	27.7079	19.1244	9.96979	93.5348
380	28.0029	23.1773	7.29733	103.168
381	33.0282	17.7345	8.52068	91.1655
382	30.0149	11.8608	10.7568	126.748
383	25.4694	14.2636	8.25878	82.5827
384	38.1082	15.6604	10.3771	117.249
385	30.1894	14.1405	9.10302	87.3104
386	23.3534	17.3119	7.7718	97.8861
387	26.2688	14.3644	9.66741	86.6872
388	34.3717	22.8554	9.59874	107.701
389	32.7275	23.187	9.65582	111.917
390	25.7805	18.3906	9.44408	95.6865
391	20.7661	19.8639	9.4772	111.38
392	27.466	20.3098	9.71338	91.2223
393	28.178	16.2205	8.95713	74.165
394	36.7136	11.116	7.31835	80.4176
395	33.0368	23.0029	8.27817	72.308
396	29.7083	8.14699	8.97771	89.675
397	25.4614	16.4879	8.96895	118.647
398	25.3755	21.6202	9.7239	89.3918
399	27.3318	16.6231	9.98629	52.6145
400	33.6721	18.0585	8.45004	141.273
401	34.224	23.2307	9.46726	66.1445
402	24.5779	18.9216	9.18167	109.09
403	32.9833	16.3072	8.34757	90.3407
404	41.4927	12.5283	8.56725	111.254
405	35.1482	7.16989	8.06512	94.938
406	27.5459	15.1365	8.4376	125.462
407	22.3157	12.0476	9.38247	101.026
408	30.8924	18.0071	9.21688	120.607
409	28.0484	19.8034	9.12206	90.3172
410	28.524	24.3729	9.37793	99.9404
411	29.2268	12.2008	8.00578	86.6908
412	39.5247	19.4004	8.72346	100.674
413	34.7494	18.2879	9.70568	119.294
414	19.8276	20.0901	8.30376	121.506
415	38.7446	24.216	8.57561	81.7012
416	26.2248	14.386	9.33149	90.5785
417	25.5266	16.0069	8.68578	86.5796
418	36.6968	21.912	8.0013	116.394
419	26.1339	14.0702	9.20545	106.261
420	31.5696	15.4163	9.1041	79.6304
421	24.3994	13.3734	8.03461	127.155
422	25.0841	13.5085	7.88933	91.3575
423	29.8626	16.7693	8.97858	85.4977
424	49.6131	13.2173	8.66773	80.714
425	23.5853	13.9071	7.99063	105.865
426	23.278	14.7085	7.68584	108.981
427	33.5083	9.51296	9.34264	113.432
428	24.8933	13.6544	9.01673	112.163
429	41.7427	11.9683	9.29634	89.2794
430	35.4877	19.9006	8.10855	95.8955
431	27.5948	15.7947	8.15876	92.4353
432	37.2437	13.5182	10.4366	102.493
433	33.7634	17.8395	8.92169	77.6039
434	29.2978	14.4203	9.55359	89.0698
435	23.0185	19.4944	7.86807	89.7446
436	39.8901	12.617	9.00547	99.0517
437	32.3286	19.9475	8.6913	103.644
438	35.267	12.5338	9.25522	90.3487
439	17.8488	10.3322	10.2228	83.6665
440	34.7577	14.1	9.2757	108.098
441	26.8958	22.6422	8.76132	93.9482
442	33.1724	18.6702	9.28191	112.83
443	25.9946	21.6945	8.8444	121.502
444	35.0006	10.9719	9.83227	100.432
445	32.3257	16.359	7.13691	98.2292
446	25.0577	15.6518	7.42842	80.4621
447	23.8674	19.9704	9.22607	96.2856
448	34.6163	13.8176	9.93996	107.258
449	31.6902	15.7493	9.13	69.32
450	37.5632	14.2175	7.42617	87.9194
451	30.876	19.7103	9.37586	81.7765
452	33.722	22.6171	9.52402	141.223
453	30.7267	19.9699	8.33792	104.557
454	24.1804	15.5123	8.61155	76.5578
455	24.7268	7.60004	8.13361	109.216
456	37.4831	11.0791	9.6931	107.727
457	43.1526	19.7619	9.82408	116.102
458	20.1317	11.7703	7.26159	131.983
459	29.7721	22.3427	9.12239	117.329
460	35.3873	15.6979	9.05453	71.8547
461	37.3941	6.89963	10.1031	106.43
462	34.0257	10.25	7.74924	91.7687
463	33.8571	11.0577	8.11322	107.178
464	23.0998	18.225	9.58463	119.511
465	22.4081	12.6728	10.997	89.695
466	28.401	10.1143	10.2796	154.6
467	32.3466	17.4556	10.0678	100.038
468	49.1974	19.0569	8.97675	124.831
469	23.5289	16.3707	9.71047	86.34
470	35.4358	13.1604	8.57408	138.176
471	22.4771	16.7252	8.75601	132.722
472	33.3307	22.0634	7.93188	94.2819
473	30.8306	12.4691	9.22845	81.8671
474	34.9806	6.95782	8.12997	102.008
475	30.4847	14.5007	8.7028	120.027
476	31.0019	17.2824	10.4982	107.949
477	42.3266	20.3716	9.50489	69.0029
478	29.5217	22.2188	8.92598	84.7654
479	20.7614	18.785	9.56677	88.8523
480	28.6248	17.7433	10.2969	95.4345
481	33.3025	11.4482	9.49921	74.5536
482	25.1845	20.3429	9.84381	112.383
483	33.3869	16.5066	9.7636	102.26
484	25.9362	6.2017	7.9305	99.6988
485	36.9694	13.0536	8.91168	111.973
486	34.8794	21.8725	9.835	82.3993
487	20.943	7.88352	7.75162	87.6457
488	28.5303	21.4783	9.21191	73.408
489	20.3276	15.2892	7.90303	110.343
490	37.4383	15.4118	8.74612	113.43
491	32.8995	16.5746	7.8877	86.0938
492	26.2371	19.6271	8.32663	102.439
493	25.7432	13.0013	9.60169	132.249
494	34.1616	11.2279	9.2577	65.3899
495	33.7685	20.7535	10.1143	102.474
496	33.6203	15.4669	8.95396	102.792
497	28.1748	15.8957	8.56744	109.249
498	33.3874	20.0747	7.86164	112.741
499	40.1727	19.9407	9.60521	102.691
500	32.2188	22.0887	9.17323	148.197
501	35.2473	12.4594	8.83653	93.3743
502	28.0311	16.7156	8.3424	129.159
503	28.0539	17.1909	8.34554	117.513
504	26.6044	13.8354	9.66962	131.689
505	35.861	14.0935	9.17648	106.361
506	37.42	10.1056	9.65535	73.6829
507	35.2552	21.836	8.15585	85.3461
508	26.8876	17.6957	10.3504	119.597
509	32.6623	13.2307	9.0267	109.62
510	22.5645	19.7674	7.60734	106.21
511	35.9256	19.0625	9.27581	85.404
512	29.4043	21.021	8.94678	98.8912
513	32.0307	21.4699	8.52391	122.564
514	28.1469	19.2017	8.35238	107.638
515	34.0921	8.90881	9.39421	87.5617
516	35.5322	15.8621	9.132	80.0855
517	34.6793	13.8812	9.53656	104.33
518	34.353	15.9148	7.88682	105.622
519	27.1986	22.0002	8.9663	100.88
520	39.5085	14.5169	8.67135	91.1598
521	35.6637	13.6722	8.64767	88.5033
522	29.4001	9.8751	8.09521	70.0934
523	22.8105	25.3671	9.19916	86.8632
524	31.3204	11.7013	7.95682	139.64
525	29.9503	12.5585	9.32813	135.821
526	22.5868	15.8264	8.38328	107.035
527	32.0476	8.23074	8.54251	106.656
528	24.4479	17.7082	8.47094	99.1475
529	34.2044	13.3264	8.27737	102.87
530	25.8938	16.0611	8.00262	91.0356
531	37.1678	15.1517	8.94864	109.714
532	39.822	18.5807	8.48103	120.838
533	27.9152	23.7898	8.79974	80.5457
534	29.4018	11.5188	9.17381	86.834
535	28.8725	19.2543	8.98007	107.598
536	46.7502	16.0235	9.22583	97.0884
537	30.6222	22.068	8.61731	76.1828
538	31.9744	18.3636	7.86843	119.193
539	41.9767	20.6717	9.82023	52.4898
540	45.2676	15.0792	8.37758	112.48
541	30.6246	10.6723	7.74756	64.975
542	37.5784	17.7752	9.57124	116.407
543	31.4971	19.1045	8.41588	99.1039
544	33.9781	10.6708	7.89043	104.469
545	40.4587	19.9333	9.85783	115.758
546	33.8223	19.8324	8.99316	69.8187
547	27.6703	20.4553	9.31857	72.5418
548	19.3778	15.4756	8.84272	64.7735
549	33.9982	14.9243	8.90221	101.018
550	34.3161	11.1645	8.41004	113.022
551	36.4543	17.7514	8.85468	59.6555
552	30.1295	17.2997	7.63792	93.0678
553	36.8387	17.8246	9.55313	102.835
554	37.3097	25.2708	7.99695	92.4066
555	34.1289	9.34699	7.914	115.897
556	28.846	16.2935	7.94601	108.171
557	31.669	22.0977	8.8732	85.6617
558	36.886	16.342	8.79896	127.634
559	24.2548	13.0162	8.09816	105.259
560	25.6731	9.37505	7.97296	122.555
561	24.2659	11.4463	8.40386	91.1491
562	28.9107	12.774	7.93982	116.174
563	25.8258	7.59089	7.86943	85.3821
564	24.2062	23.2783	8.6855	89.5604
565	19.0728	12.4218	10.1079	113.137
566	35.2457	11.5734	8.65503	113.293
567	38.3683	17.1073	9.57763	98.4738
568	45.461	18.356	8.47163	137.133
569	39.4541	25.6763	9.75668	97.7266
570	23.3101	15.816	9.43159	100.818
571	39.7992	16.2611	9.7015	123.491
572	22.1053	12.1108	8.54528	89.9054
573	33.8591	16.0446	9.24415	102.79
574	22.4197	17.9756	9.95554	68.8288
575	30.0159	16.5104	10.0508	89.3428
576	23.379	15.6951	8.50531	118.914
577	31.8637	12.9344	8.38353	99.5567
578	29.8072	14.6649	9.36413	103.589
579	36.6265	17.9628	7.51296	108.392
580	45.0142	21.4511	8.45425	98.528
581	38.0963	18.0763	9.80823	74.8479
582	33.4409	15.1543	8.95829	101.904
583	24.6586	14.3416	8.51814	115.354
584	43.5681	16.5744	8.3572	113.199
585	22.2889	13.8893	9.2486	95.023
586	31.3012	14.9853	9.35598	101.675
587	31.1395	15.4925	9.54379	134.713
588	31.5608	18.0321	8.99211	113.395
589	24.9038	20.1202	7.76936	119.415
590	31.1833	14.415	7.92695	119.328
591	29.9752	9.04906	9.90044	80.1454
592	33.4365	15.2359	7.43964	85.4232
593	30.6305	6.3948	8.64888	85.6931
594	27.5684	12.3796	9.62582	116.581
595	44.0943	10.5782	9.12127	85.4409
596	33.0508	22.4291	8.71159	103.984
597	32.6844	6.03197	8.55858	101.587
598	38.1738	10.8797	8.74592	53.7248
599	29.2178	21.7081	8.44936	91.9688
600	16.7437	14.3868	9.86116	103.143
601	29.7553	11.5882	9.60585	69.5708
602	28.28	16.2279	9.09982	88.2746
603	24.5632	21.0527	8.67612	122.582
604	34.653	14.5402	9.46552	78.2281
605	21.7987	10.8854	7.47713	90.0595
606	25.5073	10.3865	8.60217	108.3
607	21.162	19.4035	9.40227	100.845
608	34.4814	19.0095	9.22128	98.1091
609	44.7826	18.902	8.48181	67.2478
610	23.9243	19.3608	9.79922	102.556
611	22.6862	17.2243	8.66406	78.4615
612	27.832	16.0254	8.74524	65.9628
613	35.2263	10.741	8.59248	90.1054
614	22.3926	18.437	9.15693	99.8856
615	31.6743	17.318	9.04583	119.626
616	23.8307	11.2858	8.92283	83.2152
617	33.9851	10.0188	8.51692	87.847
618	28.9635	14.6301	8.49639	117.512
619	27.8662	21.9789	7.83105	143.338
620	35.3931	11.5642	10.3061	100.519
621	40.1981	17.7049	9.19725	71.834
622	29.08	9.86149	8.01891	113.723
623	28.896	9.81931	8.80811	127.289
624	31.2756	9.89098	8.83294	72.6618
625	36.1154	15.478	7.92643	85.0613
626	34.4614	23.7339	8.33429	93.0176
627	37.0419	11.8729	10.0322	88.3678
628	29.1524	19.0096	9.01684	99.9221
629	28.3439	11.8713	9.07937	106.655
630	30.5331	15.1554	8.34384	118.605
631	38.5131	15.7938	9.00632	103.634
632	34.1506	12.9956	10.267	108.131
633	47.3095	18.568	8.85313	101.674
634	23.6668	13.5157	10.4933	111.254
635	16.5221	16.3633	9.57069	108.333
636	40.1376	26.4612	8.9577	110.349
637	28.5143	12.5512	8.39026	92.5153
638	29.3071	15.876	8.84609	113.714
639	17.6885	10.6765	8.47323	105.644
640	40.0176	15.482	9.02869	87.5459
641	24.1805	18.024	9.34492	79.7055
642	27.3652	11.3242	10.2214	120.745
643	27.2145	22.4772	9.28697	109.974
644	33.5349	16.0646	8.1214	118.347
645	22.2532	19.3357	9.24904	103.314
646	21.3911	16.2019	8.97901	114.485
647	26.806	19.8103	8.9769	105.515
648	31.3471	8.93235	7.89265	97.8389
649	48.7458	19.8915	8.65193	76.3254
650	33.4011	15.3497	7.92377	87.6528
651	33.35	14.197	10.4201	83.3993
652	30.6556	11.1004	9.91841	110.965
653	15.8724	13.4663	8.39256	95.9718
654	39.8464	7.27897	8.46787	64.4521
655	24.0207	12.5536	6.63068	85.5405
656	22.6931	6.00577	7.20643	99.9511
657	32.288	7.88964	7.37291	96.7264
658	23.1243	16.2112	8.18277	74.8658
659	39.1073	13.6557	10.0826	113.451
660	27.2444	9.62073	11.0925	124.28
661	27.4925	6.38451	8.97173	91.5646
662	36.2063	16.9536	6.89783	108.589
663	21.9482	19.0118	8.6421	77.7935
664	21.5357	9.8006	9.34144	89.8449
665	23.2109	15.8074	7.99526	101.308
666	32.2304	8.33542	8.30356	88.8924
667	28.1268	23.4782	8.12012	118.281
668	38.499	27.562	8.66465	89.4803
669	25.6852	8.24108	7.99266	110.417
670	30.6652	23.3257	9.15557	106.175
671	28.9091	16.0133	8.48508	110.675
672	25.5612	25.1914	8.55493	112.39
673	43.4587	14.4257	8.35881	115.845
674	35.1582	17.2798	8.40634	111.017
675	26.6118	14.4666	8.13161	116.432
676	44.2897	15.8159	8.23388	114.609
677	19.6569	16.4328	8.78257	136.509
678	36.5109	18.0618	8.53745	115.298
679	26.8322	18.0048	8.42029	96.1401
680	26.853	13.3712	9.64032	113.24
681	28.9513	20.2242	10.1225	107.549
682	29.1184	24.2671	8.55973	91.788
683	41.4117	19.8842	8.81446	75.1807
684	29.7771	13.4818	8.68378	89.7655
685	21.9068	18.4513	8.03211	101.088
686	31.0073	15.8729	7.7552	72.8522
687	19.9419	14.6982	9.584	106.393
688	18.35	18.7096	8.40728	86.9528
689	33.2777	18.478	8.8206	91.3335
690	34.8071	15.5743	7.08545	107.248
691	29.2746	17.4831	7.8195	132.462
692	20.645	9.21158	9.26887	105.229
693	34.7771	17.5637	9.35867	93.5218
694	21.05	20.9273	8.58816	61.2377
695	38.6023	15.6596	9.36581	89.9526
696	42.885	17.7059	7.86657	140.68
697	20.2516	10.4576	9.30028	91.975
698	30.8302	18.297	9.14341	109.34
699	26.3109	11.7282	8.21711	94.7825
700	29.3994	11.8866	10.4737	123.924
701	33.2071	16.4023	7.86791	84.4213
702	48.0219	19.2053	9.03601	97.6418
703	24.4824	19.5553	8.2516	118.576
704	32.6342	8.21691	8.29479	113.369
705	23.5896	17.6771	9.39606	83.7876
706	43.2593	8.82075	8.20569	91.8539
707	31.8301	17.3007	9.62342	99.5177
708	44.1918	20.1623	10.3913	86.4135
709	33.699	14.303	10.0169	114.399
710	42.927	19.9542	9.17968	105.827
711	31.1239	12.9443	8.65441	97.1699
712	27.2237	15.0233	8.95166	85.8954
713	29.5116	21.4808	7.36013	108.826
714	37.3596	16.4015	8.88628	119.859
715	30.1196	15.9452	8.70493	66.6306
716	30.4954	16.9784	9.76875	127.912
717	34.0119	17.9688	9.67644	105.276
718	19.5452	15.5721	9.49738	98.0891
719	35.6718	20.9752	9.2309	123.862
720	47.6694	17.4596	7.06784	92.1894
721	39.5851	16.4995	9.18169	87.6342
722	32.3291	16.0803	7.8266	94.5249
723	28.8434	19.7023	8.8155	112.396
724	37.1264	11.2074	9.11065	123.681
725	36.3115	12.7669	9.04235	98.0091
726	43.2811	13.4032	9.59963	121.449
727	33.1542	22.7282	8.87432	96.7061
728	29.8003	13.7009	7.95534	100.925
729	36.2952	17.5555	8.28294	81.0492
730	25.1685	17.6498	9.14966	112.145
731	18.1505	16.8022	9.34714	73.772
732	30.2478	13.584	10.0555	107.164
733	32.335	18.5946	9.06577	76.3676
734	44.9349	14.4345	8.17432	69.9973
735	29.9934	14.4702	8.61988	73.222
736	35.7581	16.1824	9.77128	136.91
737	21.3236	18.3339	7.94984	90.4193
738	28.0915	15.9441	8.46834	78.8953
739	38.3467	11.4903	9.75415	68.456
740	30.1889	17.5126	10.4734	97.225
741	30.9841	9.23734	8.4324	58.1156
742	30.5184	13.8353	8.15938	101.599
743	33.0069	7.95535	10.1521	121.007
744	39.4781	16.4545	8.79283	86.5893
745	25.8046	16.0322	11.2756	111.596
746	38.9853	14.3708	8.18355	73.9839
747	26.154	13.6975	8.92882	108.401
748	34.8629	14.9892	9.84956	116.123
749	41.8978	8.64966	8.4169	85.2616
750	27.7056	15.0009	10.5837	118.843
751	31.8837	17.4404	9.72868	118.479
752	35.791	17.8752	7.54356	118.35
753	32.8399	21.0836	8.86268	98.5341
754	35.6672	16.1339	8.74758	78.8875
755	32.5221	20.2959	8.64475	145.401
756	23.6601	23.9058	9.75192	88.6101
757	28.4225	15.2737	8.34475	112.326
758	29.9051	24.5592	9.33829	100.549
759	33.7193	19.894	7.196	86.0907
760	25.0519	18.4086	8.43407	105.271
761	32.1186	13.8239	8.90836	118.164
762	27.0624	12.7455	9.46131	89.4049
763	31.1746	9.72808	7.46559	107.011
764	31.2766	9.05468	8.57607	74.1682
765	21.8886	20.5809	9.06856	110.852
766	25.8177	17.2297	7.72788	91.0276
767	39.7755	14.8536	8.69161	87.1224
768	28.2342	17.997	8.10553	108.961
769	27.8417	10.5403	10.9029	71.258
770	38.1604	18.9572	9.0786	114.412
771	20.3287	13.0672	9.54695	80.0257
772	28.2452	17.0092	9.08585	104.023
773	34.6296	18.6571	9.79445	76.3911
774	30.2793	19.4298	7.63308	136.815
775	21.6765	14.0906	7.93743	109.879
776	29.748	9.96736	10.2118	85.1296
777	42.2677	16.0042	9.60116	91.8002
778	32.0959	10.3284	8.05774	97.9141
779	28.0068	17.1747	8.6657	101.498
780	35.6091	17.7855	9.01204	87.1255
781	20.4017	16.4977	9.0013	99.1432
782	42.1033	14.3259	10.7621	61.9585
783	28.8095	13.0539	7.89714	99.9813
784	35.129	10.0906	8.26162	105.121
785	26.5031	11.8773	8.00953	102.109
786	34.213	15.4918	9.75834	111.071
787	20.4	19.2929	9.5089	110.785
788	29.9199	19.3102	8.7711	137.105
789	35.6806	18.8047	10.9398	103.303
790	29.9009	20.5509	8.83245	119.111
791	30.1267	16.1585	8.8423	121.254
792	30.9854	12.8128	10.3638	116.354
793	39.8928	16.8828	8.77711	62.5338
794	29.3044	25.619	7.63818	95.8748
795	21.2753	16.8345	8.64137	141.92
796	35.7304	17.6724	8.25927	109.461
797	28.8938	20.1417	9.73281	99.714
798	38.7167	21.4403	8.44069	109.737
799	23.2189	18.7439	7.82664	101.754
800	26.8811	16.8857	9.98668	146.364
801	24.0945	14.8416	8.35091	121.811
802	24.4506	17.3814	7.864	81.2665
803	25.6066	9.86541	8.27181	101.926
804	45.4469	12.5819	8.99286	89.6858
805	31.3075	17.1448	9.76114	91.1548
806	38.3851	16.1009	8.89396	100.089
807	25.5879	6.41443	9.29158	88.381
808	22.2578	7.16052	9.79474	96.148
809	41.3041	22.0937	8.45141	84.9569
810	35.8502	10.3642	10.213	108.998
811	26.5863	10.2122	9.35298	86.5938
812	19.4071	16.9969	9.59329	98.012
813	25.0736	7.70906	8.42661	84.2249
814	40.8229	11.7504	10.4711	125.518
815	35.1522	12.6508	9.25903	85.4671
816	31.5576	22.8228	9.11022	112.101
817	27.0541	25.064	9.76266	82.8192
818	34.482	19.7151	8.70728	107.003
819	26.2617	16.2437	8.36925	86.3179
820	30.533	11.3595	9.40268	119.376
821	30.2509	24.6387	8.59805	89.8827
822	32.9728	12.8602	8.68463	104.194
823	34.5305	14.1063	8.49155	102.25
824	20.304	18.6559	10.167	105.516
825	25.515	15.7848	8.42504	129.085
826	31.0761	10.3808	8.4227	109.774
827	25.2915	13.4723	7.59635	108.958
828	36.0044	13.6104	8.10539	78.1454
829	27.7617	13.708	8.68299	113.17
830	29.8627	11.3012	9.10338	83.115
831	23.8542	12.741	9.58488	95.7242
832	26.5358	20.4221	9.05664	109.829
833	36.0045	14.8463	9.46115	107.068
834	34.9558	15.2045	8.47606	100.024
835	24.3324	13.4666	8.58102	112.409
836	30.7277	15.4944	9.44279	127.933
837	37.1947	7.55909	9.24134	112.556
838	40.5392	13.2462	8.67611	93.0658
839	23.1533	20.2947	8.91093	133.17
840	33.2867	17.5812	8.65331	107.208
841	43.39	17.2676	9.19237	98.0221
842	38.6372	12.3402	8.41993	110.194
843	24.3531	15.1507	8.86892	103.601
844	23.458	8.49637	8.71083	128.451
845	44.8418	25.1508	8.85934	96.2158
846	33.2007	8.85485	8.89484	113.259
847	33.9112	6.50353	9.25361	93.2417
848	34.8238	16.6938	7.899	78.0746
849	38.5075	7.87417	8.2905	101.369
850	30.9919	20.3516	6.17544	136.308
851	26.094	17.3427	9.41356	91.7731
852	26.9728	14.9819	9.72992	115.045
853	38.3293	8.93512	7.98546	127.633
854	19.51	20.9761	9.38887	69.8096
855	36.1933	17.9893	9.08454	113.192
856	17.4646	7.6572	8.81635	113.889
857	30.6372	16.1828	9.28995	60.0026
858	22.806	18.1239	8.22692	132.308
859	29.4058	19.2776	8.69761	81.7357
860	29.7524	8.2989	9.84494	80.4344
861	30.4416	12.0432	9.53599	96.8747
862	35.79	10.6485	9.84298	123.225
863	31.1361	19.1588	8.98643	91.0993
864	23.3135	14.606	8.54779	87.6022
865	37.508	8.63355	8.73488	73.183
866	27.0152	12.0828	9.25959	90.9585
867	34.6759	19.2859	9.3398	86.5246
868	22.4145	13.1132	8.43383	108.26
869	37.4841	13.5299	9.75518	74.6899
870	26.503	12.5812	9.28954	127.992
871	38.8573	11.3594	9.5958	83.5767
872	31.791	10.2031	8.76686	86.0465
873	42.6799	15.5006	9.17534	120.678
874	31.0968	19.3086	8.42918	109.921
875	24.1088	16.247	7.39754	109.841
876	38.5957	16.3698	9.55455	56.8676
877	44.9246	13.2	9.02003	69.1829
878	21.1903	17.1384	7.26585	117.886
879	40.7494	19.3058	9.22253	101.625
880	36.4144	16.3202	9.04836	92.7376
881	39.9172	18.5334	9.2087	101.817
882	27.8028	19.9045	9.29315	114.116
883	37.0437	27.3073	8.88712	110.552
884	25.9394	12.9611	8.41445	117.6
885	43.4843	7.98818	8.30339	98.8181
886	36.1256	17.7008	8.91282	86.8487
887	34.4163	15.9502	8.69396	100.269
888	29.2717	10.877	8.97747	88.6856
889	34.5186	18.1872	9.40711	87.5586
890	26.6357	18.4505	9.46937	83.4608
891	34.3935	16.2588	8.69074	110.52
892	38.2682	15.1255	9.38028	116.079
893	30.8888	9.63266	8.85572	118.611
894	36.9966	9.89107	9.51594	82.4045
895	27.7295	13.4326	8.33829	123.532
896	27.5072	10.7324	9.12157	92.1569
897	28.1303	12.0563	8.09213	119.354
898	40.8403	13.1317	9.01349	116.069
899	31.5263	14.1428	7.11577	121.402
900	34.1728	10.0041	8.83179	101.633
901	31.1344	14.8861	8.50809	118.892
902	29.5122	15.2624	8.26942	97.3428
903	15.3585	17.2283	10.089	118.468
904	29.3271	9.24174	8.0578	123.904
905	30.771	13.0342	8.69167	106.641
906	36.7379	25.1109	9.1484	85.5859
907	29.6594	12.7993	9.02813	86.1607
908	23.8821	7.08105	9.17848	83.1319
909	50.2066	16.2056	7.81624	90.2285
910	39.5258	14.7266	7.94724	100.719
911	32.3838	17.7186	9.31402	112.192
912	38.3254	11.4185	8.67824	94.9872
913	20.7456	12.7821	8.21061	80.3858
914	35.8042	17.3308	7.56796	131.864
915	32.9503	15.8747	8.59316	90.9721
916	34.5889	23.656	9.40948	124.292
917	35.3265	22.3557	9.31341	108.007
918	35.8931	10.8992	8.66894	120.738
919	35.2381	19.2477	8.01042	73.2645
920	25.9782	10.3008	9.61835	53.5177
921	30.351	17.3708	9.81793	84.1391
922	21.4047	14.3561	7.4948	142.25
923	29.8727	15.4087	9.12725	109.902
924	37.175	27.1613	8.56245	77.2741
925	26.1195	18.0658	8.02782	85.7752
926	44.9858	11.5777	9.52103	66.2814
927	26.4165	16.3232	8.78785	138.383
928	40.3265	13.4044	8.21311	75.6384
929	40.7448	15.0412	8.9256	68.0347
930	28.866	15.6228	8.80188	86.2971
931	21.2764	19.3385	9.00534	85.4335
932	30.2633	23.6168	8.88444	92.5448
933	31.285	18.1793	9.28246	106.35
934	26.7417	20.4342	8.52526	125.963
935	26.7567	16.075	8.76568	86.9672
936	30.0682	19.5038	8.96399	100.278
937	24.4569	13.3081	8.24594	92.1153
938	33.2087	14.1634	7.03683	87.3331
939	27.7725	12.4985	9.39739	63.8707
940	42.8822	16.7457	7.73048	93.4523
941	32.0032	13.2205	9.53279	112.957
942	33.7099	14.9892	8.50716	106.761
943	47.4061	16.8423	8.72175	115.235
944	28.6275	13.8481	7.1636	131.448
945	31.9557	16.7958	9.29039	115.347
946	34.7827	15.0158	9.32708	91.9713
947	32.2898	17.3953	7.08704	83.7752
948	27.9566	17.1877	8.93404	89.9307
949	56.6237	20.2442	8.57753	114.809
950	50.3783	18.0601	8.79922	104.959
951	27.5253	19.7765	8.64099	91.2914
952	47.1248	14.7687	9.25748	84.7515
953	22.0073	9.88099	7.25391	103.28
954	31.0478	18.2389	7.21659	91.2416
955	26.6683	17.0445	10.0548	116.717
956	23.6956	10.411	8.23475	126.323
957	28.4728	11.5084	8.35553	92.94
958	31.9406	13.8689	9.30857	87.4424
959	23.4025	26.6126	9.65258	112.668
960	35.4069	9.40797	8.48077	72.7787
961	23.7497	24.1552	8.99779	114.588
962	35.33	13.5646	8.66424	120.061
963	22.4795	17.0868	8.76602	75.1687
964	30.5589	16.9518	8.95163	119.722
965	26.8147	12.0735	10.9511	75.7385
966	25.2284	17.7782	7.80709	106.699
967	29.0555	23.3808	7.58967	107.982
968	37.3723	13.6849	7.56224	99.8791
969	22.4855	14.0662	8.8623	105.456
970	28.9463	24.0359	9.407	125.373
971	31.0446	19.8483	9.5138	85.5639
972	31.7846	7.45918	8.63267	72.5077
973	30.6941	14.1416	9.23613	77.7567
974	32.8879	12.8148	8.56393	93.537
975	30.5068	10.2161	9.35972	104.464
976	35.9474	15.9216	9.74611	95.4173
977	50.8441	16.2587	8.22904	103.427
978	42.2141	11.5444	8.46847	101.11
979	32.1466	12.4859	9.35657	103.366
980	31.7237	12.0088	8.67606	79.8275
981	29.675	7.96831	9.32401	132.055
982	38.0299	14.1823	8.02016	120.827
983	21.6336	24.8205	9.02674	127.063
984	36.7604	15.0687	9.08465	110.856
985	16.2401	11.7843	8.53745	129.513
986	31.0468	16.9131	9.76875	86.1951
987	22.8535	15.8608	7.73135	86.4825
988	35.8167	21.9352	8.28416	131.255
989	25.9268	21.0653	8.70191	90.1582
990	32.7121	19.7424	9.46241	130.482
991	33.7994	20.7554	8.16751	95.0344
992	35.1923	17.4448	7.71457	90.0932
993	33.8239	11.8559	9.13375	68.8968
994	21.0017	11.1904	8.50458	104.766
995	41.5436	12.6388	8.31474	102.373
996	26.9494	24.4513	8.27546	98.348
997	24.8325	15.9791	9.97027	98.0236
998	23.6447	9.43619	8.23672	61.4124
999	31.0141	11.3527	9.40624	75.3548
1000	25.6759	14.6576	7.74606	95.6411
1001	41.6495	15.334	8.67529	68.7357
1002	25.9937	12.6209	8.67013	89.5392
1003	19.9772	13.9855	8.96166	108.358
1004	33.2287	19.3204	8.17378	92.0211
1005	27.8221	21.4906	8.87733	104.13
1006	17.244	16.7451	8.09547	111.966
1007	33.658	19.5064	9.13296	82.7043
1008	36.8996	10.7643	8.7004	110.013
1009	40.8338	22.0029	9.86628	75.529
1010	30.8774	13.0552	9.92479	131.106
1011	31.165	18.5299	8.48698	113.063
1012	28.0688	19.112	9.78266	85.4872
1013	33.8992	21.3194	8.81578	118.919
1014	36.5215	18.7366	8.69025	113.233
1015	23.457	17.4518	7.90134	115.996
1016	26.5266	22.461	9.56778	105.969
1017	30.2644	14.7745	8.52992	93.5406
1018	34.2893	17.2977	8.30354	89.707
1019	27.6239	19.3253	10.1443	126.21
1020	28.4672	10.5097	9.38374	86.0529
1021	29.9015	10.2386	8.59738	128.048
1022	43.2616	19.3292	9.30383	144.334
1023	33.8336	14.5556	7.96004	94.0582
1024	23.2054	13.8005	8.77525	74.5425
1025	42.2944	12.2869	10.1748	96.2291
1026	37.1261	13.8058	9.52672	99.004
1027	41.927	12.4802	8.70905	129.483
1028	39.4241	17.6531	9.11851	73.6747
1029	29.2365	17.7408	8.55674	61.3311
1030	33.4391	7.12715	8.50407	87.8773
1031	34.321	20.1701	8.43121	96.9113
1032	24.9835	15.1322	8.35205	92.0632
1033	28.5015	16.9713	7.84804	82.2504
1034	22.3494	19.7673	8.53511	74.3087
1035	32.5953	24.6078	8.53707	126.291
1036	37.3398	13.2374	8.85419	86.382
1037	34.6714	15.1144	9.97501	103.244
1038	24.1559	22.3777	8.20138	133.218
1039	33.7924	17.8154	8.79824	110.566
1040	37.803	8.13313	9.65512	95.3677
1041	31.9048	20.5393	9.80071	80.6708
1042	43.0623	20.156	8.77661	79.9321
1043	22.8513	12.6218	9.60681	94.4032
1044	31.8624	19.4917	7.28865	110.97
1045	26.5668	18.4664	8.35095	77.1193
1046	42.284	12.8016	6.41013	78.9369
1047	30.7012	12.1496	9.56901	112.27
1048	30.8584	21.5749	9.95682	91.11
1049	30.1225	12.397	8.89877	122.969
1050	36.8413	11.6387	9.62333	108.815
1051	30.409	14.1378	7.84695	120.476
1052	30.51	23.3084	9.50127	103.411
1053	43.1951	19.3194	8.82363	82.7173
1054	29.8728	19.996	8.59248	115.569
1055	19.7906	18.5497	8.85033	70.2261
1056	31.6948	19.4415	7.96253	77.3086
1057	41.8711	7.84445	8.09158	126.147
1058	34.1041	10.885	9.28513	99.9409
1059	33.1844	12.4018	9.74242	139.07
1060	31.9609	16.3735	9.5047	111.748
1061	40.5474	19.4938	8.4297	135.909
1062	29.4968	26.5314	8.41062	100.601
1063	34.3188	11.4559	8.59162	100.857
1064	22.3966	19.7844	10.1376	102.378
1065	41.5537	18.9591	6.53107	60.5758
1066	16.0757	13.5649	8.09414	86.725
1067	30.3342	28.7706	8.85875	92.1021
1068	41.1208	15.526	8.78155	93.9392
1069	28.1752	18.619	8.85535	112.42
1070	22.8453	19.8462	8.74253	107.413
1071	30.4877	20.1804	8.82719	98.5545
1072	29.6483	7.57188	11.0066	135.738
1073	25.2983	8.16251	7.85917	99.9703
1074	28.8047	16.1715	9.62691	110.705
1075	30.9215	10.4609	8.90358	106.023
1076	22.499	15.137	8.2493	118.665
1077	42.8177	17.4878	8.98899	75.0637
1078	29.5998	23.287	7.49818	80.3032
1079	32.1821	9.53885	8.12672	115.358
1080	31.6328	8.43972	10.3388	102
1081	21.0689	12.8968	10.3529	117.175
1082	33.8218	16.4743	8.33721	109.886
1083	21.8877	12.4849	8.82303	97.721
1084	34.0505	13.4421	8.16797	126.565
1085	38.9878	8.4778	7.75812	83.1635
1086	32.4517	18.7743	9.65841	96.5888
1087	26.6575	18.2788	8.14768	75.2941
1088	33.9818	16.3029	9.3751	88.5399
1089	32.5676	17.9078	9.96837	91.8586
1090	42.8175	9.95884	8.36596	117.836
1091	25.5794	14.3296	8.99284	106.239
1092	36.5479	24.7888	8.00489	90.7842
1093	16.1716	17.7548	7.5402	115.627
1094	25.4763	15.0235	7.32992	87.529
1095	40.1265	14.2716	8.49677	85.6083
1096	32.2062	24.3845	7.23683	88.6314
1097	36.5547	10.6007	8.5645	130.006
1098	38.2952	22.0888	8.41944	102.454
1099	21.8958	12.8611	8.37633	112.4
1100	28.6388	11.7232	9.03098	108.796
1101	46.6906	11.833	7.73576	74.7981
1102	33.2796	6.09472	9.47261	105.387
1103	23.1727	15.9281	8.74011	94.1296
1104	41.7774	26.5123	8.94141	117.226
1105	32.3974	15.4386	8.20272	114.179
1106	28.068	16.9344	9.71789	115.173
1107	28.8992	15.1222	9.1563	110.706
1108	43.6335	19.0989	9.01129	101.188
1109	15.3171	15.2327	8.41619	95.1103
1110	36.5616	12.6653	9.67833	67.6725
1111	42.5502	17.7049	7.78447	89.1834
1112	39.1042	12.2695	9.19722	121.634
1113	21.6882	21.1998	7.97169	104.733
1114	20.5453	18.7863	8.57851	103.532
1115	26.793	8.01618	7.85706	119.009
1116	28.7163	12.9806	7.66932	84.5024
1117	36.5906	18.528	9.30711	88.9217
1118	30.8821	10.9537	8.27056	119.029
1119	40.5367	17.8118	8.59272	96.3814
1120	28.6232	9.84557	8.14274	75.192
1121	28.8536	12.5786	8.66711	103.53
1122	32.9736	18.7562	8.90657	102.832
1123	36.9266	23.1969	9.5593	89.515
1124	19.9181	10.2547	9.39279	93.9615
1125	28.2412	22.16	9.2045	122.628
1126	26.3818	9.94081	9.13656	108.614
1127	18.7424	15.1391	9.07001	132.353
1128	39.9309	19.7487	7.97056	96.9317
1129	31.0714	13.9258	9.61884	98.2811
1130	16.3748	11.4528	8.63581	55.6913
1131	21.3543	11.2208	8.19496	103.838
1132	34.852	15.9087	9.19166	109.084
1133	41.4323	14.8881	8.5913	104.403
1134	31.7511	23.1171	8.17513	92.7271
1135	40.3428	10.0825	7.51686	68.4139
1136	28.8118	14.1717	9.08752	91.9949
1137	31.174	12.1304	9.01319	83.6234
1138	42.1417	8.63696	9.34948	128.026
1139	28.1069	14.1395	9.31136	99.1531
1140	29.8929	9.52364	9.47583	122.518
1141	34.1819	12.5149	9.85117	73.0189
1142	37.4718	20.7997	7.62063	122.833
1143	41.4737	10.0388	9.53514	91.7699
1144	32.2375	17.2801	8.38529	74.988
1145	24.9807	13.2165	10.1895	90.7455
1146	42.2987	24.3586	8.39829	104.53
1147	33.0313	18.4838	7.70617	89.2129
1148	34.721	12.5727	8.60553	132.105
1149	18.2321	14.5904	9.10523	85.19
1150	29.2561	11.9397	9.84022	108.915
1151	30.2677	21.6303	8.78257	89.0692
1152	29.5039	18.1336	9.29202	97.6741
1153	39.0196	9.89518	8.53805	96.6351
1154	34.6719	17.2449	7.40006	116.883
1155	31.88	13.6308	8.84633	126.392
1156	36.935	9.21409	9.93587	128.162
1157	25.7036	18.467	8.90147	106.416
1158	35.925	14.7457	9.35835	92.2869
1159	36.5537	10.8239	8.68025	77.4717
1160	29.8973	16.5573	8.42447	85.2119
1161	25.7881	11.3801	9.59897	115.716
1162	48.4131	15.3314	8.34869	121.708
1163	19.982	17.9198	9.22984	100.627
1164	31.1939	16.1392	9.57029	89.2944
1165	40.7371	13.602	8.99388	136.741
1166	27.0451	12.5076	8.08025	101.775
1167	47.3543	13.2016	8.40901	99.5918
1168	32.257	19.6649	8.5876	105.049
1169	28.4355	13.6274	8.74939	108.213
1170	30.4662	13.6361	9.18602	103.054
1171	27.8344	14.3778	9.68672	79.2417
1172	30.2728	18.2297	10.4761	117.029
1173	32.9298	21.2418	9.48505	102.186
1174	19.2938	21.7122	9.976	121.902
1175	24.5547	14.8278	9.99769	95.0024
1176	27.3839	13.3137	9.586	92.0892
1177	35.7714	13.6207	9.52217	99.8379
1178	26.0442	12.7594	8.05681	93.2961
1179	28.2434	9.90004	8.65868	99.8279
1180	29.8849	16.6473	10.031	83.9903
1181	34.4928	24.4437	8.91877	93.6494
1182	30.507	7.41227	8.72324	108.249
1183	37.6309	13.9139	8.76533	125.262
1184	30.0045	19.7377	8.86844	108.949
1185	32.1237	14.2048	8.41383	87.7433
1186	30.3251	9.64587	8.14591	110.804
1187	40.6704	14.1298	8.88757	93.3654
1188	23.7806	15.5122	7.72173	91.863
1189	35.7817	14.0731	9.01239	100.56
1190	24.1119	16.471	10.2879	107.928
1191	23.3639	16.7702	8.395	117.235
1192	33.6639	14.0817	8.47442	127.392
1193	40.491	12.8613	9.28158	114.029
1194	38.4926	17.7818	9.86484	85.5734
1195	35.4782	17.3064	8.8417	87.4485
1196	30.5058	12.7533	8.83137	129.499
1197	33.2177	14.0233	9.35253	114.27
1198	32.283	14.7131	8.01379	85.8169
1199	34.8694	19.3145	9.80737	103.27
1200	51.2532	10.718	8.53405	140.637
1201	35.8123	11.2983	9.21426	120.774
1202	32.4609	16.2616	8.29729	95.4871
1203	34.9353	10.8557	9.27288	96.1958
1204	31.4134	14.8972	11.2949	96.8105
1205	26.1632	12.521	9.76591	153.854
1206	15.8671	17.9955	8.5978	89.1254
1207	25.0209	14.3905	10.0343	122.488
1208	35.5697	21.2895	8.27871	127.589
1209	23.3699	14.4027	10.0298	94.2448
1210	27.1181	18.1738	10.2669	105.847
1211	37.7048	15.085	9.42335	89.9962
1212	34.5397	15.5323	7.83179	93.7907
1213	35.9625	17.5273	9.21081	98.4722
1214	44.4896	18.145	9.15401	97.5872
1215	32.6323	15.6452	9.27086	86.6196
1216	33.1443	15.3679	9.63166	123.982
1217	34.4402	13.8468	8.31574	135.061
1218	49.4156	8.35586	8.61078	64.6363
1219	33.5482	24.0596	8.78242	101.861
1220	15.3632	13.6954	7.71427	125.351
1221	35.1937	23.114	9.57091	98.5655
1222	28.8984	13.0397	9.71822	96.2322
1223	31.6884	6.53723	8.39234	107.123
1224	37.2924	15.6953	7.59777	128.121
1225	30.2934	14.3682	8.40874	114.013
1226	31.1973	19.0573	9.40629	106.936
1227	22.2647	16.5238	9.46189	101.103
1228	39.3145	11.9102	8.22396	107.122
1229	34.8343	14.7989	9.39042	101.597
1230	32.3785	15.7411	9.31227	86.8503
1231	38.6475	17.0147	9.17214	123.043
1232	36.748	15.1424	8.89864	96.4806
1233	21.4625	11.0017	6.76839	106.349
1234	41.515	14.5525	7.49081	95.4232
1235	26.4514	20.7672	9.31733	87.5227
1236	17.2618	19.3554	8.69005	73.9496
1237	23.5652	22.0932	9.91843	84.0357
1238	25.8858	17.0777	8.14557	103.392
1239	40.7619	13.2074	7.78182	93.5103
1240	28.07	28.2738	8.8695	109.021
1241	34.1209	13.4927	9.34893	105.092
1242	27.2153	16.4559	10.0683	97.0519
1243	37.3727	10.5193	7.32352	86.1226
1244	34.3242	9.84944	9.26061	102.32
1245	35.2094	11.8487	10.0815	99.5633
1246	26.1688	21.795	8.55294	129.515
1247	22.6346	20.1858	8.03617	76.1552
1248	27.9495	14.4497	8.07875	86.8842
1249	33.0177	17.6182	8.23486	111.334
1250	30.1377	16.1839	9.17182	88.9261
1251	25.911	10.8418	8.40522	99.2905
1252	35.5985	14.6944	8.29185	103.778
1253	38.7165	8.6184	8.83596	97.4319
1254	31.3935	17.3639	8.68838	122.44
1255	37.7422	6.81026	8.87916	79.1469
1256	34.3925	23.2097	9.01694	106.162
1257	27.7038	25.253	7.44402	63.0798
1258	27.8708	17.0017	8.5908	97.8527
1259	38.6803	17.9893	8.19934	69.1625
1260	23.2095	6.79128	8.02563	110.125
1261	44.1787	12.8739	8.31189	75.2005
1262	42.9833	10.2642	8.9121	127.549
1263	31.1357	17.2114	9.73884	99.5192
1264	27.8728	22.4218	7.03875	94.078
1265	24.7424	7.59599	9.63985	101.409
1266	37.3191	8.64664	8.20632	99.9924
1267	24.0825	16.3506	8.67008	132.028
1268	35.5212	11.7859	8.99091	97.984
1269	30.4495	17.0416	9.54055	98.32
1270	31.0294	16.8553	9.67449	105.138
1271	31.3469	15.0759	9.69802	84.4327
1272	23.3569	17.0267	8.8828	59.3991
1273	33.2817	17.047	8.55627	88.7883
1274	38.193	11.1186	8.46232	129.953
1275	31.0425	15.921	9.00387	86.4343
1276	30.876	12.1922	9.28645	93.6009
1277	35.0824	21.1867	9.83748	104.303
1278	50.5602	14.3312	8.92968	97.7435
1279	27.077	12.6379	8.06141	90.4128
1280	17.7932	13.2577	8.49749	73.3217
1281	19.1494	15.7844	8.15794	89.6606
1282	27.9515	11.7461	9.65254	91.2788
1283	27.3182	14.0695	8.60731	125.94
1284	26.8699	14.2763	9.27881	133.834
1285	24.2353	20.3974	8.03618	100.168
1286	29.5896	18.6953	9.35305	145.857
1287	25.4253	19.9939	8.58351	117.532
1288	40.8478	12.6408	8.94408	75.3096
1289	38.4117	15.5671	10.9243	105.159
1290	23.4775	15.07	7.13328	81.2821
1291	41.9841	20.7378	8.72882	65.6834
1292	46.9601	23.477	9.29397	114.629
1293	25.1251	13.1548	8.17316	86.3947
1294	33.0884	24.1589	9.08622	113.317
1295	34.6923	23.3411	8.17929	115.522
1296	35.0981	18.9388	8.60258	104.561
1297	30.5215	13.8196	8.71667	87.902
1298	25.3203	11.8685	9.8265	144.075
1299	39.0104	19.6224	8.7122	105.558
1300	32.5109	12.1207	9.82188	92.8533
1301	25.8354	18.0975	9.48779	100.347
1302	28.2407	13.7922	8.40212	81.0307
1303	29.7226	12.8357	8.31129	90.5458
1304	22.919	23.149	7.92012	87.8892
1305	38.4587	11.5524	8.37141	95.8728
1306	35.7411	18.2196	8.52462	98.8041
1307	44.5694	6.04203	9.20639	125.066
1308	30.7002	14.4958	8.19727	106.939
1309	35.8817	13.7639	8.36679	62.0855
1310	22.7923	7.62094	7.88586	137.086
1311	26.916	11.9814	9.03979	103.361
1312	29.8415	11.4515	9.14831	114.955
1313	39.4459	17.8178	9.20629	92.1093
1314	32.8206	18.8154	8.08036	79.7094
1315	37.9645	13.2749	9.83964	133.738
1316	29.1819	20.7205	9.71865	91.1311
1317	36.1503	17.2844	7.59822	104.247
1318	39.2804	18.6243	9.07347	97.015
1319	37.5489	18.3235	8.89702	96.6446
1320	41.8556	13.5707	7.82004	128.756
1321	25.1314	15.8795	10.0507	88.8291
1322	34.5041	18.8049	8.50654	74.8821
1323	32.1092	15.3043	8.79594	142.309
1324	39.325	13.7124	8.80707	105.337
1325	43.0918	15.644	7.62333	58.6237
1326	35.6696	15.0816	8.95712	104.793
1327	37.3116	26.2777	10.1867	108.418
1328	21.9128	22.3993	7.78014	112.661
1329	37.6042	9.10146	9.56169	80.4821
1330	39.2261	14.5445	9.02256	116.64
1331	26.3178	16.0387	9.62335	94.6858
1332	36.2676	14.6366	7.61545	102.64
1333	26.5511	12.9938	9.41417	104.998
1334	33.2879	20.8695	8.08822	88.1736
1335	31.3246	20.7403	8.74997	114.349
1336	46.1126	16.7129	6.87586	86.5319
1337	33.1607	25.8191	8.44206	80.6973
1338	33.8206	19.1398	8.76287	89.4848
1339	33.3231	24.36	9.49384	111.854
1340	20.5988	15.839	9.40517	87.2469
1341	31.9363	13.1959	7.67015	116.329
1342	40.3088	13.2014	10.7143	98.3383
1343	37.8836	9.32098	8.19218	95.6492
1344	32.2757	15.5027	8.79104	90.1
1345	40.6557	16.5773	10.1547	118.957
1346	32.8891	20.5323	8.74658	106.114
1347	33.972	17.9413	8.05918	83.4075
1348	27.5464	8.44767	8.74298	92.5197
1349	38.8945	15.0902	8.09468	114.41
1350	23.9872	10.5554	9.57405	120.162
1351	37.8584	16.0912	8.74929	110.953
1352	28.3351	6.54586	8.43431	104.454
1353	36.4238	19.0692	7.79434	94.3868
1354	26.714	8.17036	8.55476	99.5255
1355	29.0568	16.932	8.06853	124.01
1356	48.9355	14.8761	9.64926	100.119
1357	26.9326	17.4714	8.58994	108.446
1358	38.6834	19.2363	8.8033	76.28
1359	31.8147	10.8461	8.87187	121.188
1360	38.2605	16.7522	8.29711	114.348
1361	25.8692	15.2269	10.1184	126.71
1362	24.3562	18.8969	10.078	101.41
1363	37.2824	17.1821	7.88293	64.1115
1364	34.876	8.55114	9.40682	94.1302
1365	36.0941	19.7057	10.3958	107.175
1366	32.7516	17.5026	9.25911	119.682
1367	43.4022	19.6286	9.16638	59.5428
1368	33.4602	17.0511	7.78482	100.335
1369	27.1126	16.355	9.63485	105.817
1370	37.9653	14.4752	7.22363	95.4562
1371	47.8606	17.5376	8.38099	111.394
1372	41.7043	13.6979	10.6519	105.975
1373	29.259	19.9908	8.32818	120.323
1374	38.3772	11.1451	8.45491	113.581
1375	24.3398	14.8335	8.17443	90.7463
1376	25.5342	15.6599	9.02467	97.063
1377	44.5366	24.6734	7.74673	106.495
1378	37.5473	14.1248	8.4967	113.794
1379	42.893	16.8439	10.1299	81.1646
1380	26.3505	17.6715	8.37366	124.292
1381	24.75	16.9193	8.7865	98.3722
1382	25.1572	18.0533	7.58139	99.8437
1383	23.9952	22.1373	8.54951	125.495
1384	22.7577	17.3369	9.00113	85.9021
1385	28.6998	16.8318	9.7167	77.9783
1386	33.7642	9.25558	9.17959	89.1013
1387	35.4343	14.0922	8.68477	98.6745
1388	23.5857	15.3216	8.65665	120.739
1389	24.1699	8.76855	9.99902	105.683
1390	23.396	17.8025	9.2361	109.975
1391	43.1071	11.5393	8.73073	137.912
1392	39.1414	15.1275	9.53168	101.33
1393	30.2621	13.9752	8.94504	86.2643
1394	37.8532	22.5853	9.60007	104.508
1395	28.4652	20.5676	10.1973	117.695
1396	24.2402	10.8223	8.15517	82.1775
1397	28.7068	9.74236	9.85771	98.9698
1398	25.4774	15.7562	7.75575	67.1077
1399	33.5372	10.4701	9.34078	107.896
1400	18.5947	13.7664	7.80757	88.3339
1401	24.1208	14.4868	7.96509	126.321
1402	28.5	16.9305	8.56856	117.545
1403	46.156	20.4611	8.59163	117.934
1404	22.4291	14.1887	8.77198	116.547
1405	33.3474	17.8373	8.18521	128.652
1406	32.9757	22.4525	8.08671	83.2743
1407	34.1475	16.1907	7.95189	77.3768
1408	35.1045	10.9805	8.42548	120.654
1409	39.096	17.717	10.1519	97.1852
1410	34.9756	18.7746	8.33263	85.1627
1411	33.9002	14.1712	8.39875	109.73
1412	35.5442	18.9559	8.69262	102.646
1413	31.7351	16.0122	9.96795	121.294
1414	28.4637	8.36228	9.28444	107.927
1415	34.5716	10.2075	8.84972	107.219
1416	43.5951	19.6674	7.77069	88.1928
1417	30.2693	17.6209	9.75208	126.731
1418	30.0837	8.38609	9.86785	101.802
1419	36.059	19.6492	9.2219	89.3809
1420	30.5372	10.6134	9.21643	105.658
1421	35.5136	18.5823	9.59583	101.644
1422	24.175	12.2302	8.62998	75.067
1423	22.668	18.5561	10.8226	82.2256
1424	31.4665	20.1535	6.55578	99.8805
1425	36.1211	17.5165	7.74628	123.934
1426	41.1893	13.1913	7.00309	117.761
1427	25.9119	14.9237	9.41714	78.3651
1428	34.4325	12.7714	9.96984	64.7221
1429	23.8518	16.6363	7.82508	97.9726
1430	30.1309	12.3074	9.51796	100.071
1431	37.8521	17.9714	9.25935	84.8863
1432	36.0463	6.11738	9.25004	104.507
1433	35.5855	22.5115	9.14512	124.014
1434	32.9817	12.6997	8.13584	77.5436
1435	41.6593	16.1316	9.19745	112.38
1436	37.0459	22.7389	9.44214	117.266
1437	34.0742	13.9307	9.51137	82.0534
1438	32.9375	20.4096	9.12996	126.882
1439	36.3088	12.816	9.58589	89.9906
1440	22.7674	10.4641	9.71551	104.182
1441	27.1278	18.9584	9.5178	97.9522
1442	38.4317	18.4022	7.83451	96.7581
1443	37.5028	14.5403	8.96556	108.787
1444	26.2395	22.5902	9.95766	63.027
1445	25.2998	13.5615	8.17223	84.4246
1446	19.4139	20.6453	8.94319	94.8123
1447	37.6292	18.5778	8.87405	133.43
1448	44.2351	23.4285	8.06917	100.401
1449	27.2667	14.9745	9.21569	76.0063
1450	22.2256	15.3858	8.6392	116.256
1451	36.372	13.3171	9.00281	98.1266
1452	29.1526	7.46148	7.07241	108.238
1453	33.8899	19.161	8.56143	74.8249
1454	25.0345	8.1454	8.17534	128.14
1455	40.0961	14.3532	9.89524	112.02
1456	35.9699	12.9023	8.18051	94.6186
1457	34.1372	12.4701	8.73616	93.4068
1458	35.5093	13.1801	9.36935	88.7214
1459	34.8984	15.9313	9.81138	105.545
1460	33.8565	6.58619	9.16343	115.067
1461	41.5061	15.505	8.55183	96.0949
1462	25.3864	11.8463	8.97578	124.932
1463	31.3494	11.5677	8.06697	120.088
1464	39.2078	17.4321	8.32606	91.4318
1465	30.5013	12.4184	9.38516	81.988
1466	43.5058	20.1596	9.63968	100.609
1467	28.6509	17.5491	9.17045	97.2128
1468	34.4789	16.6569	8.65642	130.952
1469	27.0066	18.4011	8.90718	81.2414
1470	21.4126	12.5745	8.56949	112.797
1471	28.7412	15.3643	9.32396	109.553
1472	31.8341	11.5973	8.02266	82.4825
1473	28.6043	12.0815	9.65504	116.726
1474	26.768	12.9153	9.02048	77.515
1475	20.1869	6.77774	8.13952	82.1402
1476	36.6203	14.5686	8.96098	105.265
1477	38.658	12.3082	8.12984	116.459
1478	30.8529	27.7283	8.48028	92.2308
1479	26.2087	23.204	7.5488	108.174
1480	17.9353	15.1237	7.78913	77.9984
1481	25.7374	16.1095	8.1108	72.7147
1482	43.0126	18.5192	8.88173	95.8808
1483	40.8943	10.8351	9.11785	86.7571
1484	22.997	19.3043	8.43327	116.994
1485	20.5862	11.1611	9.42216	114.357
1486	24.8404	9.40219	8.78583	103.534
1487	29.694	18.864	8.9647	83.2287
1488	23.9116	10.1154	7.89481	71.7266
1489	28.0836	14.0825	8.24221	92.8542
1490	38.363	20.8852	9.16299	90.8457
1491	26.2254	11.5321	9.06459	70.19
1492	30.5483	14.3017	9.06975	98.9688
1493	24.1928	17.6915	9.81757	98.5443
1494	42.8506	11.5083	9.66501	93.536
1495	24.7817	8.75114	9.682	107.325
1496	34.0841	19.7364	8.30754	126.065
1497	43.3949	20.4226	8.90204	70.2583
1498	35.1474	13.8131	7.69655	110.95
1499	27.0216	13.1692	9.07639	63.072
1500	32.8944	20.5166	8.98668	99.9121
1501	29.7785	22.1267	7.70083	89.5801
1502	32.984	22.9368	8.85993	105.566
1503	37.1042	6.44322	8.76578	98.7832
1504	28.7863	12.0742	8.87929	103.904
1505	29.8113	10.9175	9.15506	104.431
1506	28.2777	19.6228	9.29429	101.996
1507	27.9022	17.2023	8.19793	102.442
1508	27.7174	20.5183	8.20687	114.737
1509	23.4637	8.60086	9.44832	106.959
1510	39.496	6.5894	8.75712	86.4965
1511	32.6668	19.21	9.76815	70.5686
1512	17.3095	25.1235	10.6551	134.263
1513	43.3361	14.7087	8.00487	93.7273
1514	30.9832	22.0142	9.24738	109.029
1515	33.8031	13.9773	9.65795	68.0604
1516	28.9226	7.83437	8.85447	86.8836
1517	32.5956	12.5411	9.07445	129.459
1518	32.9636	9.11234	9.29649	78.7364
1519	36.7314	15.7209	9.17761	116.5
1520	30.0856	18.7748	9.13414	136.791
1521	39.387	19.7816	8.76929	115.078
1522	42.5235	13.6098	7.4692	69.9167
1523	32.0589	17.0822	8.07078	124.913
1524	32.4089	8.94022	8.9213	114.385
1525	19.1137	17.3127	7.86185	104.123
1526	31.5411	18.871	8.56092	84.2862
1527	34.95	13.9047	8.55402	79.5207
1528	28.9391	11.7708	8.95492	100.732
1529	30.5523	15.6014	8.20785	87.9793
1530	31.5304	18.0393	9.27598	102.675
1531	27.6326	16.6436	9.02408	102.327
1532	34.5307	16.7456	8.5193	90.1437
1533	37.0034	14.4614	9.2885	141.336
1534	29.9112	18.4698	8.5915	93.2683
1535	33.2344	15.3245	8.74979	97.4007
1536	33.1974	24.3898	9.32865	99.7068
1537	44.1385	17	9.67281	83.4971
1538	43.0024	17.8671	9.51953	75.805
1539	25.0474	14.5263	9.31242	94.0054
1540	31.2398	12.9294	9.8795	110.456
1541	23.6856	17.6786	7.67627	102.162
1542	22.2818	17.3684	9.49215	100.518
1543	36.8837	6.88845	8.85447	79.6882
1544	42.0584	18.3587	8.27319	116.875
1545	34.8993	13.6671	11.2728	139.138
1546	20.507	23.0577	8.54201	104.061
1547	30.9391	12.283	7.86429	115.113
1548	36.8732	18.9972	8.46006	126.407
1549	28.258	17.0318	9.05137	108.362
1550	28.0721	11.1634	9.21327	102.874
1551	31.767	11.2172	7.65103	106.074
1552	24.0235	10.222	7.57177	94.6833
1553	41.4282	19.5242	7.93908	67.9171
1554	33.0479	10.556	8.53595	126.969
1555	30.8097	12.1811	8.21392	84.321
1556	28.6142	18.3996	8.93139	118.105
1557	34.2032	14.4511	9.97175	113.939
1558	39.1938	22.6223	7.69456	96.0107
1559	22.4019	8.24517	9.0444	90.9234
1560	52.6862	19.5821	8.25986	77.7135
1561	41.9992	11.4351	9.36275	114.575
1562	28.9331	21.6169	9.58696	62.2275
1563	30.2613	16.0952	9.01043	59.6674
1564	42.3374	19.643	9.17615	93.0224
1565	29.9162	11.1511	8.90387	87.337
1566	32.0493	17.0168	10.0283	139.222
1567	36.6944	20.1388	9.26554	105.092
1568	27.4327	14.9979	9.45897	125.02
1569	15.9771	17.0291	8.75705	104.837
1570	23.6608	21.9381	9.66348	114.697
1571	34.2292	13.6834	9.46374	106.661
1572	28.9857	17.6507	9.25148	94.8984
1573	39.3195	8.94051	10.2637	100.633
1574	22.7261	20.8442	8.57169	81.7524
1575	38.9814	17.7641	9.82218	125.353
1576	36.7887	17.9318	9.46522	108.229
1577	30.0558	13.0019	9.3375	125.205
1578	34.6053	19.8758	8.73014	77.5358
1579	30.072	18.9357	8.53916	98.9154
1580	29.4644	24.2197	9.20252	119.658
1581	28.1092	12.9221	9.33541	134.955
1582	28.5274	13.8582	8.57033	121.33
1583	33.6114	18.508	9.22492	106.465
1584	27.4019	11.8496	8.3507	90.4643
1585	30.7423	13.5188	8.07925	77.4087
1586	37.1446	13.0158	9.0611	126.893
1587	15.8764	25.9019	9.39826	128.601
1588	37.2521	13.9544	9.10168	106.779
1589	18.1999	22.7438	8.66705	62.29
1590	19.0168	18.1339	10.2979	55.9635
1591	28.7563	11.0989	9.09548	83.0051
1592	32.3106	17.2086	8.23017	111.092
1593	29.7859	21.3979	8.23596	105.664
1594	27.0437	23.4141	8.67268	77.6022
1595	34.8288	10.9781	9.03485	96.3817
1596	29.3281	15.5661	9.01567	107.946
1597	27.3294	11.9772	8.81937	73.6038
1598	44.0029	16.8312	8.23973	99.1851
1599	28.0995	10.066	8.32435	132.951
1600	29.382	17.3038	9.18471	117.748
1601	32.0675	11.0559	8.73597	117.933
1602	38.7286	15.5071	9.67111	104.62
1603	36.2062	14.7717	8.59982	92.4907
1604	40.7264	7.54559	9.00191	117.743
1605	28.879	12.5907	8.87016	102.235
1606	40.8465	17.9409	7.98468	84.1085
1607	37.2793	18.6226	7.71166	94.0622
1608	32.3436	21.1064	9.23379	101.28
1609	24.02	12.7814	8.63944	81.0404
1610	28.892	16.1666	6.94541	88.7385
1611	31.1663	23.6171	9.06159	76.536
1612	24.8395	17.2638	9.1219	66.949
1613	32.1876	12.0758	7.42496	118.034
1614	34.2798	17.1781	9.31708	71.2662
1615	22.5013	12.0105	9.05052	118.199
1616	38.4509	13.4031	9.27189	99.6947
1617	29.1982	16.7323	6.52936	102.634
1618	36.708	20.4745	7.60483	81.8381
1619	40.4372	20.7371	7.91088	129.513
1620	43.4682	19.7134	8.19764	78.9405
1621	27.0116	16.1199	8.50928	159.652
1622	21.6773	9.51044	10.3926	98.9085
1623	34.5347	14.8926	9.30708	67.9668
1624	34.6944	16.014	8.49515	121.401
1625	33.9254	16.3521	9.37987	85.5726
1626	38.5395	15.0779	9.56336	71.8056
1627	30.0772	17.2982	9.3807	107.484
1628	22.7088	12.1797	8.59296	102.267
1629	33.0269	15.3232	9.19859	109.204
1630	25.5177	20.5921	8.24121	90.0034
1631	20.2993	15.6634	9.86936	103.093
1632	29.6037	12.5306	8.94189	86.3287
1633	38.0897	20.8788	8.00616	95.9434
1634	37.8737	16.0605	8.76991	108.709
1635	31.0243	15.5015	8.00383	94.1658
1636	32.2703	16.568	8.24852	111.206
1637	33.9039	15.9538	7.9184	76.1956
1638	33.2234	16.8918	8.2396	164.942
1639	31.8347	12.6372	8.4248	130.086
1640	29.3598	20.3204	8.40032	130.728
1641	35.2544	9.50918	7.94313	60.316
1642	20.7194	17.5963	9.48797	126.112
1643	34.4188	10.3986	9.41543	84.2034
1644	30.9399	6.22674	8.72013	97.804
1645	26.915	13.1163	7.2103	117.887
1646	23.6333	22.3911	9.02008	116.159
1647	26.1111	20.2123	8.90788	84.0367
1648	33.973	24.2028	8.68466	110.078
1649	38.7045	17.1294	7.54385	90.6939
1650	41.621	26.1188	8.7796	111.515
1651	35.9976	16.0242	7.69713	100.912
1652	44.3625	14.1589	8.46045	111.091
1653	36.2041	8.00038	8.65796	91.931
1654	30.6353	16.8804	6.7833	146.062
1655	30.5207	23.8478	8.15702	130.119
1656	28.1265	14.8582	9.47038	86.8967
1657	26.1125	16.7585	10.012	83.6194
1658	32.1535	13.9925	9.20549	71.3435
1659	36.9752	13.0128	8.16081	68.0802
1660	35.2783	11.1856	9.57688	97.1008
1661	35.2826	20.7094	9.72777	78.0784
1662	31.009	14.3336	7.954	86.8711
1663	39.1636	11.8867	10.055	82.6933
1664	21.3164	20.1643	9.04255	111.912
1665	44.0264	17.7965	9.31917	105.325
1666	37.0111	9.45992	7.87128	73.6327
1667	19.0444	17.8578	9.00738	132.859
1668	32.0546	24.6395	8.94811	116.781
1669	42.2387	10.4774	8.3797	95.3129
1670	27.2484	9.82894	9.21172	94.1624
1671	39.4488	22.5325	8.84635	87.5935
1672	32.0213	13.7392	8.6074	104.556
1673	39.0594	16.0674	8.79201	98.9646
1674	43.2004	13.5479	8.26459	83.2978
1675	26.8422	14.4817	8.48008	82.3365
1676	35.4485	23.5405	7.27747	87.781
1677	25.9997	15.5374	9.05043	73.6693
1678	23.432	21.5735	8.33752	116.245
1679	26.911	19.4639	9.83064	73.7079
1680	15.3664	9.61852	9.11622	85.7952
1681	35.1846	19.8729	8.15921	109.616
1682	27.9812	12.2239	9.02412	115.092
1683	26.4504	9.31372	8.63119	104.237
1684	32.1731	12.8224	9.28173	82.3232
1685	28.218	16.9232	10.0149	71.4405
1686	27.8841	23.0935	8.50574	128.45
1687	36.8721	15.1607	8.11227	102.985
1688	36.1228	12.6198	10.0078	64.382
1689	27.2934	11.6407	9.74183	82.2594
1690	24.0667	23.4079	9.36794	89.9069
1691	36.2362	14.3127	9.61746	77.5224
1692	27.6048	8.90107	8.27152	134.637
1693	19.7332	10.7698	8.38546	87.8668
1694	22.8579	14.3827	8.7509	82.085
1695	26.775	16.4534	8.49009	105.18
1696	21.1442	25.3954	9.42247	95.994
1697	28.6219	13.2311	9.04988	116.626
1698	35.6017	17.4958	8.29374	76.9674
1699	33.2464	24.4316	9.26406	107.585
1700	26.4977	15.7606	7.62262	68.7515
1701	24.4477	18.6235	9.13359	103.361
1702	37.2493	14.4138	8.0994	125.837
1703	30.1274	19.3513	8.65772	78.2835
1704	26.0705	14.8095	9.26154	115.16
1705	34.9207	19.5798	8.64956	101.096
1706	28.8701	15.6046	8.93392	106.681
1707	32.4059	15.5211	7.4377	78.0622
1708	34.3677	18.7657	9.28157	117.134
1709	30.3879	8.87762	7.9328	124.817
1710	34.58	10.0728	10.4275	103.802
1711	22.6923	19.0979	8.73889	58.3691
1712	31.3146	18.7733	8.36777	102.858
1713	23.2273	14.0398	8.40692	84.9466
1714	27.8628	17.1338	8.32707	89.6288
1715	29.6034	16.8182	9.49543	95.8913
1716	38.9656	23.235	9.42631	109.26
1717	34.733	19.0859	9.17383	82.3413
1718	17.2781	17.9797	8.7095	103.271
1719	20.2813	11.4448	8.79937	83.1562
1720	25.1274	10.092	10.2799	79.0181
1721	29.2983	17.1707	8.41369	114.594
1722	38.5812	11.9075	9.62396	98.5209
1723	40.4151	23.8997	7.8784	97.1774
1724	22.8679	12.6707	9.36324	71.3335
1725	34.3857	15.8359	8.59567	88.8089
1726	22.4591	13.3236	7.72423	89.561
1727	20.7075	17.5146	8.89886	102.051
1728	32.2373	17.5126	8.54324	125.12
1729	27.2793	12.765	8.727	79.9031
1730	27.4051	14.3454	9.77889	103.828
1731	38.7764	12.2199	9.92457	76.7952
1732	34.482	20.0966	8.1535	92.6433
1733	24.8672	23.4892	8.32024	77.9581
1734	25.5204	9.79034	8.6434	80.1953
1735	40.4019	20.869	9.10236	150.738
1736	39.8075	16.2428	10.0542	90.255
1737	32.7225	22.1117	9.4304	84.0543
1738	39.2952	13.6398	9.82916	65.6004
1739	19.7253	8.30954	8.47374	91.3781
1740	38.5968	20.1033	8.98372	130.536
1741	44.7615	18.6096	8.47592	105.391
1742	33.1241	12.2627	10.3226	102.13
1743	29.1003	15.3403	9.55003	97.6383
1744	30.9535	23.2075	8.39945	110.551
1745	21.4652	12.5976	8.53036	119.839
1746	40.7352	11.6279	8.67492	86.271
1747	26.4669	9.68696	8.45574	144.41
1748	41.1152	14.6563	8.81012	88.6285
1749	38.6282	16.0346	9.05995	107.803
1750	32.9496	20.4997	8.45827	123.45
1751	26.5089	10.3283	8.00099	116.437
1752	32.9993	21.4502	8.91574	101.961
1753	41.0842	10.9478	7.2873	108.699
1754	23.3567	24.0909	8.97785	86.0019
1755	16.2007	22.5312	7.26293	81.5326
1756	35.6207	14.9485	9.26843	104.841
1757	48.2793	11.5969	8.10652	97.7203
1758	23.6917	23.1341	9.00891	89.8238
1759	30.8375	16.591	10.3959	101.292
1760	39.2091	13.4295	8.24253	113.276
1761	32.699	12.3395	9.01061	97.596
1762	27.3665	9.08074	8.8078	115.002
1763	30.5985	12.039	8.45381	119.706
1764	42.3049	23.8015	9.24251	143.854
1765	36.3117	8.08342	7.56807	97.9254
1766	25.9189	14.6186	7.69242	90.6436
1767	25.0025	11.9293	9.67807	102.365
1768	35.2089	8.94066	7.97185	100.652
1769	39.5458	17.1323	8.82128	100.359
1770	37.7937	12.944	8.56866	110.018
1771	22.1194	11.6465	9.39546	88.9633
1772	25.64	16.5992	9.09568	116.039
1773	31.5809	12.2957	8.18348	122.922
1774	26.9339	12.3761	9.21655	72.256
1775	40.0781	7.83224	8.61143	130.335
1776	34.5635	17.9493	9.17545	103.924
1777	31.1741	14.0275	9.06463	79.3938
1778	40.6721	10.0054	9.03998	112.924
1779	32.4007	21.2869	8.47503	110.797
1780	34.3042	20.2136	9.88044	117.425
1781	39.9539	19.0789	8.87353	65.462
1782	30.0465	23.4871	9.83071	93.1123
1783	27.5008	10.1759	8.70436	163.518
1784	41.6118	18.2584	8.3971	112.576
1785	20.5933	15.28	9.73232	105.48
1786	34.8492	9.68632	9.08792	111.104
1787	31.9069	13.8093	9.60256	97.8026
1788	31.2186	12.7375	10.0788	117.965
1789	32.4011	18.0785	10.019	81.9372
1790	38.9776	9.68655	7.8649	131.163
1791	30.6399	22.1754	10.5354	105.923
1792	34.3869	13.8116	9.4324	86.8479
1793	45.7357	11.5446	8.25618	91.9968
1794	36.4638	20.2927	8.61074	107.8
1795	32.838	12.8157	9.36544	118.579
1796	29.2845	10.7767	9.02394	82.4562
1797	20.3159	13.8881	8.96249	112.127
1798	25.3435	17.7226	9.08068	110.163
1799	22.7928	18.7533	8.1785	125.177
1800	22.093	12.8371	8.81328	109.585
1801	41.2909	14.825	8.31549	139.326
1802	34.3225	17.3089	8.88931	104.66
1803	33.8933	15.4644	9.975	120.011
1804	35.5276	21.592	9.94598	94.5455
1805	38.5269	17.5091	8.88957	84.3524
1806	36.438	8.04109	8.16284	68.1021
1807	21.956	20.0548	9.79295	130.642
1808	31.2921	15.2289	9.09009	73.3042
1809	28.4384	15.94	10.2266	115.485
1810	28.0421	14.9107	10.0153	102.579
1811	29.7099	12.5131	9.22485	118.392
1812	33.7035	16.6509	9.60543	79.2884
1813	36.4717	13.6354	8.64402	93.783
1814	33.3811	14.401	9.1665	96.7061
1815	21.2586	14.32	9.76395	96.8783
1816	28.4407	7.7646	8.30636	94.4977
1817	34.2154	22.4047	8.30763	106.578
1818	29.4622	15.9354	8.51533	128.873
1819	45.7938	16.0613	8.27219	112.533
1820	28.8569	12.2478	9.91805	104.667
1821	26.6072	15.7506	8.84882	115.436
1822	18.9201	12.698	8.10331	93.8364
1823	41.8909	21.6661	8.67651	89.7081
1824	29.1322	12.5138	9.17846	124.447
1825	33.3331	16.1331	10.5862	106.872
1826	34.2779	20.073	7.51771	140.162
1827	29.8766	15.8044	8.72574	106.954
1828	17.8225	11.4082	8.35208	67.0772
1829	32.3015	17.687	9.30226	139.512
1830	39.6711	15.0885	8.50247	106.704
1831	37.8607	10.6648	6.60116	111.669
1832	31.8124	13.8772	9.17163	146.753
1833	22.7643	19.3877	7.76212	120.593
1834	32.0927	16.5055	9.17673	97.7251
1835	38.0311	19.361	7.28278	111.651
1836	28.9072	13.868	8.1327	51.0224
1837	32.1268	8.15639	8.96194	104.184
1838	35.6563	21.7885	10.1385	114.693
1839	28.5923	18.687	9.20763	72.2604
1840	26.653	12.7725	8.93381	96.0542
1841	38.0481	7.7907	9.22686	116.468
1842	29.7919	13.1792	8.30916	100.958
1843	31.7579	15.3068	8.66655	81.2664
1844	29.6734	17.9958	8.62878	99.9099
1845	37.0052	16.1986	7.25744	93.3947
1846	27.4754	9.00797	9.23193	113.744
1847	39.8444	7.73937	9.22829	90.9923
1848	39.1938	15.3517	8.83878	117.697
1849	37.7365	14.63	8.96402	86.8459
1850	49.4317	21.9926	8.37997	112.661
1851	39.0371	13.7629	7.8969	83.6507
1852	50.5876	20.4962	7.97674	109.28
1853	21.0713	11.7858	9.16999	102.132
1854	26.4914	18.1261	8.47245	94.1055
1855	35.432	16.3977	7.59775	100.468
1856	33.1448	13.739	9.32347	105.735
1857	40.8599	18.36	9.70071	105.793
1858	45.8935	16.4751	8.72646	116.288
1859	45.6389	11.052	8.2148	86.9467
1860	36.6536	17.8033	7.87537	95.4422
1861	17.3255	8.35573	10.325	71.9509
1862	30.0459	21.3715	8.8736	97.7876
1863	29.6572	19.5778	8.8384	105.427
1864	38.6731	21.2234	8.14351	73.1764
1865	27.106	15.6886	7.33251	111.543
1866	18.5367	13.2076	9.1482	136.247
1867	16.7807	15.0699	7.96507	75.3994
1868	29.862	11.9533	8.25617	126.628
1869	37.3704	17.3211	8.46672	110.363
1870	31.3373	17.5696	8.2798	89.0004
1871	21.951	13.0652	8.79699	95.6593
1872	27.4897	10.9592	9.25688	98.9171
1873	19.2184	13.0662	8.65669	92.8511
1874	36.9945	10.3148	9.56993	101.373
1875	23.6674	18.7826	8.35441	101.301
1876	32.2975	15.2782	8.63619	101.208
1877	32.9878	15.6406	7.89797	87.5766
1878	23.305	8.13229	8.52973	79.311
1879	41.2344	16.1323	8.61395	108.507
1880	32.2367	11.1817	8.3474	76.3401
1881	29.2087	16.81	8.73815	88.1856
1882	41.7008	9.09671	9.67587	113.01
1883	31.0494	16.7575	7.47749	91.3924
1884	38.7417	15.5338	8.89813	99.7927
1885	31.8702	11.0239	9.33973	99.0925
1886	42.1615	9.22377	9.38856	90.3233
1887	21.6776	9.96194	9.065	83.859
1888	27.891	23.4764	9.26388	86.5818
1889	30.4404	25.2509	8.92965	87.3895
1890	22.6307	11.6268	9.15148	128.454
1891	26.2447	15.7672	9.57043	88.0718
1892	45.7904	13.3409	8.90894	77.3191
1893	36.5061	10.7173	9.13791	82.2358
1894	33.4356	19.273	8.67093	71.4443
1895	35.0111	15.6977	9.01553	112.574
1896	25.8088	16.2643	6.69433	81.2802
1897	29.6509	23.393	7.95643	75.05
1898	43.0888	15.6013	8.01149	92.6942
1899	31.7299	7.13221	7.80462	78.5781
1900	32.6718	23.2395	8.483	107.722
1901	30.9894	25.8927	8.29201	76.8103
1902	37.4524	11.8263	8.1668	109.786
1903	43.1661	12.8879	9.26253	77.8327
1904	40.8016	29.8356	7.02603	80.6121
1905	29.5827	8.30012	8.93851	103.244
1906	24.2745	7.10252	8.15784	88.8626
1907	31.7234	17.7848	8.13974	109.682
1908	27.8369	15.0386	9.41427	96.0491
1909	37.2571	12.1382	9.74684	72.4772
1910	24.9662	13.9581	10.7067	99.5258
1911	48.5352	22.8829	8.61641	74.3024
1912	21.7146	13.3673	9.10397	99.6668
1913	32.9474	19.6517	8.37921	98.2552
1914	28.6029	19.7554	9.26026	94.5573
1915	31.8279	18.7624	9.5121	118.468
1916	37.887	17.5464	9.8179	94.4899
1917	17.6632	20.1845	8.566	89.3873
1918	35.5881	18.2312	10.2259	67.8073
1919	17.3313	14.7949	8.55326	101.408
1920	37.7393	15.2251	8.01738	113.11
1921	34.4671	16.2404	8.17766	123.116
1922	33.8524	19.4764	8.34859	100.643
1923	31.9809	9.24315	9.40063	80.027
1924	29.0114	17.8126	9.99383	156.218
1925	19.4527	11.7811	7.50272	58.5799
1926	28.0495	17.5242	7.51643	76.3717
1927	15.8764	22.5052	8.65433	108.872
1928	30.4371	13.9004	8.18799	96.3772
1929	24.6784	17.0955	8.54188	89.1717
1930	38.8942	23.6984	8.46486	112.93
1931	33.307	15.1323	9.56303	95.2273
1932	27.8193	18.8395	7.66788	104.675
1933	28.7304	22.4254	9.59897	103.533
1934	33.9816	16.8518	8.5608	107.632
1935	36.4494	14.1959	9.74835	115.783
1936	30.0158	14.8798	9.89119	92.2776
1937	24.2794	15.1593	8.78602	61.9771
1938	27.5001	18.8543	9.21619	87.6422
1939	24.5719	17.5812	9.11646	106.59
1940	32.1201	11.2488	8.68325	110.657
1941	28.9389	19.6851	8.73839	106.854
1942	37.9348	9.65927	8.28275	110.414
1943	32.0987	15.0928	9.85132	107.715
1944	49.2802	15.251	7.50277	67.5138
1945	38.0495	12.2474	8.01279	117.423
1946	31.0021	16.4221	8.90543	104.315
1947	31.1003	20.9887	9.7326	84.0357
1948	25.3686	20.9709	8.78704	106.168
1949	31.5453	13.4835	8.17811	105.742
1950	29.4522	14.1025	8.26628	85.2925
1951	36.1487	8.46638	7.63996	90.7481
1952	48.7696	8.18709	8.28752	101.719
1953	26.9095	17.636	8.57749	95.5477
1954	21.845	11.0005	8.43522	109.996
1955	24.9181	11.4676	8.95318	78.1111
1956	31.5863	17.0448	7.90611	81.1844
1957	34.5001	16.4087	8.23684	87.3782
1958	29.7681	16.6833	9.29829	82.1762
1959	30.6285	12.7025	8.86994	107.961
1960	34.0281	21.7471	8.04659	92.289
1961	26.1464	17.3071	9.58121	116.687
1962	29.4906	17.0217	9.23192	75.1695
1963	25.4407	16.2156	8.08736	85.8194
1964	32.2093	15.3551	9.12682	82.9846
1965	33.193	19.083	9.04133	51.4637
1966	27.8328	14.8395	9.09075	83.6137
1967	25.8832	16.2679	10.2542	92.1428
1968	33.1408	10.7551	8.14743	64.8329
1969	36.6817	9.55146	8.02649	140.818
1970	34.1911	15.265	8.21801	97.1067
1971	33.0052	7.04011	9.18786	115.001
1972	30.5789	24.579	8.87735	99.1983
1973	43.1577	24.4112	8.41622	81.7151
1974	26.3454	14.723	8.52037	70.5572
1975	34.4735	24.5808	8.42815	105.314
1976	27.4303	18.6306	8.60563	104.221
1977	19.7109	11.4087	8.19784	67.6024
1978	26.339	12.0333	8.86178	66.4979
1979	33.8643	7.98975	7.82823	94.7257
1980	33.8485	10.5105	9.57105	94.4562
1981	25.2725	11.0894	7.11277	92.9426
1982	22.3017	12.5986	8.92078	100.318
1983	32.0919	14.6599	9.36834	53.902
1984	38.9273	12.3892	8.17022	90.1188
1985	31.8965	20.4458	9.32335	109.223
1986	30.3588	10.5509	7.95555	82.0692
1987	30.0879	10.8687	8.66974	100.104
1988	17.0315	20.8017	7.50289	101.985
1989	30.5899	10.2911	9.52419	116.979
1990	45.1169	19.1387	8.74116	93.1345
1991	27.7304	12.2511	7.80062	113.821
1992	29.865	9.06573	8.26219	103.304
1993	32.8838	9.11161	9.79461	113.2
1994	33.647	14.0643	7.37384	107.315
1995	29.819	21.5019	7.60163	131.461
1996	33.5478	10.9546	9.62267	74.8006
1997	37.3486	9.29367	9.74021	114.715
1998	33.1177	13.5224	8.9209	122.552
1999	27.1584	17.3289	9.60063	97.5608
[truncated: 8,001 more rows]

## Sheet: Simulation Output Values 1
Sim #	ADD	ADDc	CR	HQ
1	4.26317e-05	5.37159e-06	3.58106e-06	0.142106
2	4.73649e-05	5.96797e-06	3.97865e-06	0.157883
3	5.60363e-05	7.06057e-06	4.70705e-06	0.186788
4	4.94131e-05	6.22605e-06	4.1507e-06	0.16471
5	5.21946e-05	6.57652e-06	4.38435e-06	0.173982
6	5.32675e-05	6.7117e-06	4.47447e-06	0.177558
7	6.40161e-05	8.06603e-06	5.37735e-06	0.213387
8	3.86076e-05	4.86456e-06	3.24304e-06	0.128692
9	3.42261e-05	4.31249e-06	2.87499e-06	0.114087
10	8.51842e-05	1.07332e-05	7.15547e-06	0.283947
11	4.9792e-05	6.27379e-06	4.18253e-06	0.165973
12	3.96187e-05	4.99196e-06	3.32797e-06	0.132062
13	2.98804e-05	3.76494e-06	2.50996e-06	0.0996015
14	3.06727e-05	3.86476e-06	2.5765e-06	0.102242
15	2.98262e-05	3.7581e-06	2.5054e-06	0.0994205
16	5.38619e-05	6.7866e-06	4.5244e-06	0.17954
17	5.63463e-05	7.09963e-06	4.73309e-06	0.187821
18	3.3076e-05	4.16758e-06	2.77839e-06	0.110253
19	2.11076e-05	2.65956e-06	1.77304e-06	0.0703586
20	8.11511e-05	1.0225e-05	6.81669e-06	0.270504
21	4.93272e-05	6.21523e-06	4.14348e-06	0.164424
22	4.29381e-05	5.4102e-06	3.6068e-06	0.143127
23	3.6592e-05	4.61059e-06	3.07373e-06	0.121973
24	5.14483e-05	6.48249e-06	4.32166e-06	0.171494
25	3.76644e-05	4.74571e-06	3.16381e-06	0.125548
26	4.2804e-05	5.3933e-06	3.59553e-06	0.14268
27	2.76604e-05	3.48521e-06	2.32348e-06	0.0922014
28	2.21546e-05	2.79147e-06	1.86098e-06	0.0738485
29	5.40029e-05	6.80437e-06	4.53625e-06	0.18001
30	5.85124e-05	7.37257e-06	4.91504e-06	0.195041
31	9.21774e-05	1.16144e-05	7.7429e-06	0.307258
32	8.47026e-05	1.06725e-05	7.11502e-06	0.282342
33	5.32457e-05	6.70895e-06	4.47264e-06	0.177486
34	3.00035e-05	3.78044e-06	2.5203e-06	0.100012
35	5.2302e-05	6.59005e-06	4.39337e-06	0.17434
36	2.91557e-05	3.67362e-06	2.44908e-06	0.0971856
37	2.95821e-05	3.72734e-06	2.48489e-06	0.0986069
38	6.26694e-05	7.89634e-06	5.26423e-06	0.208898
39	5.32905e-05	6.71461e-06	4.47641e-06	0.177635
40	4.21482e-05	5.31067e-06	3.54045e-06	0.140494
41	2.91834e-05	3.67711e-06	2.45141e-06	0.0972781
42	3.10106e-05	3.90734e-06	2.60489e-06	0.103369
43	0.000103529	1.30447e-05	8.69647e-06	0.345098
44	4.06711e-05	5.12456e-06	3.41638e-06	0.13557
45	2.32908e-05	2.93464e-06	1.95643e-06	0.077636
46	7.23575e-05	9.11705e-06	6.07803e-06	0.241192
47	3.84312e-05	4.84234e-06	3.22822e-06	0.128104
48	5.80316e-05	7.31199e-06	4.87466e-06	0.193439
49	2.64711e-05	3.33535e-06	2.22357e-06	0.0882369
50	5.44407e-05	6.85953e-06	4.57302e-06	0.181469
51	3.92224e-05	4.94203e-06	3.29469e-06	0.130741
52	4.63503e-05	5.84014e-06	3.89343e-06	0.154501
53	4.04567e-05	5.09755e-06	3.39836e-06	0.134856
54	5.47007e-05	6.89229e-06	4.59486e-06	0.182336
55	3.80125e-05	4.78958e-06	3.19305e-06	0.126708
56	5.02034e-05	6.32563e-06	4.21708e-06	0.167345
57	5.28142e-05	6.65459e-06	4.43639e-06	0.176047
58	2.87599e-05	3.62375e-06	2.41583e-06	0.0958665
59	3.38899e-05	4.27013e-06	2.84675e-06	0.112966
60	2.04696e-05	2.57917e-06	1.71945e-06	0.068232
61	3.10382e-05	3.91081e-06	2.60721e-06	0.103461
62	2.86563e-05	3.6107e-06	2.40713e-06	0.0955211
63	7.02546e-05	8.85208e-06	5.90138e-06	0.234182
64	7.45607e-05	9.39465e-06	6.2631e-06	0.248536
65	8.27212e-05	1.04229e-05	6.94858e-06	0.275737
66	4.43656e-05	5.59006e-06	3.72671e-06	0.147885
67	3.65708e-05	4.60793e-06	3.07195e-06	0.121903
68	3.28278e-05	4.13631e-06	2.75754e-06	0.109426
69	5.3594e-05	6.75285e-06	4.5019e-06	0.178647
70	2.81051e-05	3.54125e-06	2.36083e-06	0.0936838
71	6.75877e-05	8.51605e-06	5.67737e-06	0.225292
72	6.21393e-05	7.82955e-06	5.2197e-06	0.207131
73	5.54608e-05	6.98806e-06	4.65871e-06	0.184869
74	7.1633e-05	9.02576e-06	6.01718e-06	0.238777
75	7.22404e-05	9.10229e-06	6.06819e-06	0.240801
76	3.61731e-05	4.55781e-06	3.03854e-06	0.120577
77	8.8112e-05	1.11021e-05	7.4014e-06	0.293707
78	5.7554e-05	7.2518e-06	4.83454e-06	0.191847
79	8.91299e-05	1.12304e-05	7.48691e-06	0.2971
80	9.42449e-05	1.18749e-05	7.91657e-06	0.31415
81	2.37516e-05	2.99271e-06	1.99514e-06	0.0791721
82	4.6816e-05	5.89882e-06	3.93255e-06	0.156053
83	5.50918e-05	6.94157e-06	4.62771e-06	0.183639
84	2.57744e-05	3.24757e-06	2.16505e-06	0.0859146
85	4.14955e-05	5.22843e-06	3.48562e-06	0.138318
86	4.62385e-05	5.82606e-06	3.88404e-06	0.154128
87	2.11176e-05	2.66082e-06	1.77388e-06	0.0703919
88	4.79124e-05	6.03697e-06	4.02465e-06	0.159708
89	4.27621e-05	5.38802e-06	3.59201e-06	0.14254
90	5.50899e-05	6.94133e-06	4.62755e-06	0.183633
91	3.88337e-05	4.89305e-06	3.26203e-06	0.129446
92	6.43418e-05	8.10707e-06	5.40471e-06	0.214473
93	4.47326e-05	5.63631e-06	3.75754e-06	0.149109
94	4.38399e-05	5.52382e-06	3.68255e-06	0.146133
95	7.16063e-05	9.0224e-06	6.01493e-06	0.238688
96	1.72018e-05	2.16743e-06	1.44495e-06	0.0573394
97	8.3958e-05	1.05787e-05	7.05247e-06	0.27986
98	5.43222e-05	6.8446e-06	4.56307e-06	0.181074
99	3.86727e-05	4.87276e-06	3.24851e-06	0.128909
100	4.21761e-05	5.31419e-06	3.5428e-06	0.140587
101	6.44865e-05	8.1253e-06	5.41687e-06	0.214955
102	8.26117e-05	1.04091e-05	6.93938e-06	0.275372
103	4.25498e-05	5.36127e-06	3.57418e-06	0.141833
104	4.15517e-05	5.23551e-06	3.49034e-06	0.138506
105	1.84486e-05	2.32453e-06	1.54968e-06	0.0614954
106	3.99211e-05	5.03006e-06	3.35337e-06	0.13307
107	3.94439e-05	4.96994e-06	3.31329e-06	0.13148
108	4.26148e-05	5.36946e-06	3.57964e-06	0.142049
109	5.21729e-05	6.57378e-06	4.38252e-06	0.17391
110	3.5728e-05	4.50172e-06	3.00115e-06	0.119093
111	2.98114e-05	3.75623e-06	2.50415e-06	0.0993712
112	5.54725e-05	6.98954e-06	4.65969e-06	0.184908
113	4.71045e-05	5.93516e-06	3.95677e-06	0.157015
114	7.58481e-05	9.55685e-06	6.37124e-06	0.252827
115	4.3992e-05	5.54299e-06	3.69533e-06	0.14664
116	5.25163e-05	6.61705e-06	4.41137e-06	0.175054
117	0.000117002	1.47422e-05	9.82817e-06	0.390007
118	1.70577e-05	2.14928e-06	1.43285e-06	0.0568592
119	4.57259e-05	5.76147e-06	3.84098e-06	0.15242
120	7.6395e-05	9.62577e-06	6.41718e-06	0.25465
121	4.71021e-05	5.93486e-06	3.95658e-06	0.157007
122	2.71964e-05	3.42674e-06	2.2845e-06	0.0906546
123	4.73981e-05	5.97216e-06	3.98144e-06	0.157994
124	5.1104e-05	6.4391e-06	4.29273e-06	0.170347
125	5.42647e-05	6.83736e-06	4.55824e-06	0.180882
126	6.37856e-05	8.03698e-06	5.35799e-06	0.212619
127	6.43568e-05	8.10895e-06	5.40597e-06	0.214523
128	4.5941e-05	5.78857e-06	3.85905e-06	0.153137
129	8.72563e-05	1.09943e-05	7.32953e-06	0.290854
130	5.00328e-05	6.30413e-06	4.20275e-06	0.166776
131	6.79084e-05	8.55645e-06	5.7043e-06	0.226361
132	8.07426e-05	1.01736e-05	6.78238e-06	0.269142
133	3.06579e-05	3.8629e-06	2.57527e-06	0.102193
134	1.68211e-05	2.11946e-06	1.41297e-06	0.0560703
135	2.6005e-05	3.27663e-06	2.18442e-06	0.0866835
136	4.37845e-05	5.51684e-06	3.6779e-06	0.145948
137	3.47385e-05	4.37705e-06	2.91803e-06	0.115795
138	5.01373e-05	6.3173e-06	4.21154e-06	0.167124
139	3.41344e-05	4.30094e-06	2.86729e-06	0.113781
140	5.61392e-05	7.07354e-06	4.71569e-06	0.187131
141	3.13921e-05	3.9554e-06	2.63693e-06	0.10464
142	7.06871e-05	8.90657e-06	5.93771e-06	0.235624
143	4.11915e-05	5.19013e-06	3.46009e-06	0.137305
144	7.32721e-05	9.23228e-06	6.15485e-06	0.24424
145	5.71696e-05	7.20336e-06	4.80224e-06	0.190565
146	6.82048e-05	8.59381e-06	5.7292e-06	0.227349
147	2.34277e-05	2.95189e-06	1.96793e-06	0.0780924
148	5.23967e-05	6.60198e-06	4.40132e-06	0.174656
149	6.60774e-05	8.32575e-06	5.5505e-06	0.220258
150	7.12408e-05	8.97635e-06	5.98423e-06	0.237469
151	2.378e-05	2.99628e-06	1.99752e-06	0.0792667
152	3.31137e-05	4.17232e-06	2.78155e-06	0.110379
153	8.27501e-05	1.04265e-05	6.95101e-06	0.275834
154	6.91971e-05	8.71883e-06	5.81255e-06	0.230657
155	9.94506e-05	1.25308e-05	8.35385e-06	0.331502
156	3.66654e-05	4.61984e-06	3.07989e-06	0.122218
157	4.42718e-05	5.57825e-06	3.71883e-06	0.147573
158	8.03384e-05	1.01226e-05	6.74842e-06	0.267795
159	5.45532e-05	6.87371e-06	4.58247e-06	0.181844
160	4.30895e-05	5.42927e-06	3.61951e-06	0.143632
161	6.86201e-05	8.64614e-06	5.76409e-06	0.228734
162	7.45945e-05	9.39891e-06	6.26594e-06	0.248648
163	4.471e-05	5.63346e-06	3.75564e-06	0.149033
164	5.21151e-05	6.56651e-06	4.37767e-06	0.173717
165	2.45607e-05	3.09464e-06	2.0631e-06	0.0818689
166	3.15012e-05	3.96915e-06	2.6461e-06	0.105004
167	3.07801e-05	3.87829e-06	2.58553e-06	0.1026
168	6.70724e-05	8.45112e-06	5.63408e-06	0.223575
169	2.76526e-05	3.48422e-06	2.32281e-06	0.0921752
170	4.88408e-05	6.15394e-06	4.10263e-06	0.162803
171	3.7794e-05	4.76204e-06	3.1747e-06	0.12598
172	6.74881e-05	8.50349e-06	5.669e-06	0.22496
173	7.92709e-05	9.98813e-06	6.65875e-06	0.264236
174	4.73494e-05	5.96603e-06	3.97735e-06	0.157831
175	5.72301e-05	7.211e-06	4.80733e-06	0.190767
176	4.73031e-05	5.96019e-06	3.97346e-06	0.157677
177	6.37596e-05	8.03372e-06	5.35581e-06	0.212532
178	8.26816e-05	1.04179e-05	6.94526e-06	0.275605
179	6.09006e-05	7.67348e-06	5.11565e-06	0.203002
180	2.80326e-05	3.53211e-06	2.35474e-06	0.093442
181	7.36434e-05	9.27907e-06	6.18605e-06	0.245478
182	4.75275e-05	5.98846e-06	3.99231e-06	0.158425
183	1.4756e-05	1.85925e-06	1.2395e-06	0.0491866
184	6.11221e-05	7.70138e-06	5.13426e-06	0.20374
185	5.43982e-05	6.85417e-06	4.56945e-06	0.181327
186	3.86729e-05	4.87279e-06	3.24853e-06	0.12891
187	5.44308e-05	6.85828e-06	4.57218e-06	0.181436
188	4.81516e-05	6.06711e-06	4.04474e-06	0.160505
189	3.27558e-05	4.12723e-06	2.75149e-06	0.109186
190	5.74666e-05	7.24079e-06	4.8272e-06	0.191555
191	5.47604e-05	6.89981e-06	4.59987e-06	0.182535
192	3.413e-05	4.30039e-06	2.86692e-06	0.113767
193	3.52206e-05	4.4378e-06	2.95853e-06	0.117402
194	3.1492e-05	3.96799e-06	2.64533e-06	0.104973
195	5.38849e-05	6.7895e-06	4.52634e-06	0.179616
196	3.33594e-05	4.20329e-06	2.80219e-06	0.111198
197	7.98778e-05	1.00646e-05	6.70974e-06	0.266259
198	2.40476e-05	3.02999e-06	2.02e-06	0.0801586
199	4.5026e-05	5.67328e-06	3.78218e-06	0.150087
200	6.55317e-05	8.257e-06	5.50466e-06	0.218439
201	7.52579e-05	9.4825e-06	6.32167e-06	0.25086
202	4.13686e-05	5.21244e-06	3.47496e-06	0.137895
203	2.26929e-05	2.8593e-06	1.9062e-06	0.075643
204	3.04883e-05	3.84152e-06	2.56102e-06	0.101628
205	0.00010581	1.3332e-05	8.88801e-06	0.352699
206	4.6844e-05	5.90234e-06	3.93489e-06	0.156147
207	8.9609e-05	1.12907e-05	7.52716e-06	0.298697
208	7.10613e-05	8.95373e-06	5.96915e-06	0.236871
209	4.50333e-05	5.67419e-06	3.7828e-06	0.150111
210	1.19404e-05	1.50449e-06	1.00299e-06	0.0398013
211	7.60422e-05	9.58132e-06	6.38755e-06	0.253474
212	9.9565e-05	1.25452e-05	8.36346e-06	0.331883
213	3.97584e-05	5.00956e-06	3.33971e-06	0.132528
214	2.22015e-05	2.79739e-06	1.86493e-06	0.0740051
215	1.97458e-05	2.48797e-06	1.65865e-06	0.0658194
216	6.2887e-05	7.92376e-06	5.28251e-06	0.209623
217	4.40136e-05	5.54571e-06	3.69714e-06	0.146712
218	2.7701e-05	3.49033e-06	2.32688e-06	0.0923367
219	6.55893e-05	8.26426e-06	5.5095e-06	0.218631
220	4.29879e-05	5.41647e-06	3.61098e-06	0.143293
221	8.5013e-05	1.07116e-05	7.1411e-06	0.283377
222	7.44811e-05	9.38462e-06	6.25641e-06	0.24827
223	3.74453e-05	4.71811e-06	3.14541e-06	0.124818
224	2.53994e-05	3.20033e-06	2.13355e-06	0.0846648
225	5.8052e-05	7.31456e-06	4.87637e-06	0.193507
226	2.48809e-05	3.13499e-06	2.09e-06	0.0829363
227	4.42774e-05	5.57895e-06	3.7193e-06	0.147591
228	3.55712e-05	4.48197e-06	2.98798e-06	0.118571
229	0.000119544	1.50625e-05	1.00417e-05	0.398479
230	7.70358e-05	9.70651e-06	6.47101e-06	0.256786
231	5.4018e-05	6.80627e-06	4.53751e-06	0.18006
232	4.60693e-05	5.80473e-06	3.86982e-06	0.153564
233	3.31367e-05	4.17523e-06	2.78348e-06	0.110456
234	4.80593e-05	6.05547e-06	4.03698e-06	0.160198
235	8.11241e-05	1.02216e-05	6.81443e-06	0.270414
236	5.77583e-05	7.27755e-06	4.8517e-06	0.192528
237	2.95174e-05	3.71919e-06	2.47946e-06	0.0983912
238	6.52601e-05	8.22278e-06	5.48185e-06	0.217534
239	3.40186e-05	4.28635e-06	2.85757e-06	0.113395
240	3.79885e-05	4.78656e-06	3.19104e-06	0.126628
241	3.79002e-05	4.77543e-06	3.18362e-06	0.126334
242	4.23469e-05	5.33571e-06	3.55714e-06	0.141156
243	6.74153e-05	8.49433e-06	5.66288e-06	0.224718
244	4.20318e-05	5.29601e-06	3.53067e-06	0.140106
245	3.30646e-05	4.16614e-06	2.77742e-06	0.110215
246	7.39195e-05	9.31385e-06	6.20924e-06	0.246398
247	6.95758e-05	8.76655e-06	5.84437e-06	0.231919
248	8.69083e-05	1.09505e-05	7.3003e-06	0.289694
249	2.01542e-05	2.53943e-06	1.69295e-06	0.0671808
250	0.000118045	1.48737e-05	9.91582e-06	0.393485
251	2.81316e-05	3.54458e-06	2.36305e-06	0.0937718
252	5.6224e-05	7.08423e-06	4.72282e-06	0.187413
253	2.98548e-05	3.7617e-06	2.5078e-06	0.0995159
254	6.12834e-05	7.7217e-06	5.1478e-06	0.204278
255	2.90217e-05	3.65673e-06	2.43782e-06	0.096739
256	4.06047e-05	5.11619e-06	3.41079e-06	0.135349
257	5.80287e-05	7.31161e-06	4.87441e-06	0.193429
258	6.77214e-05	8.5329e-06	5.6886e-06	0.225738
259	3.83012e-05	4.82596e-06	3.2173e-06	0.127671
260	2.78965e-05	3.51496e-06	2.34331e-06	0.0929883
261	5.92713e-05	7.46818e-06	4.97879e-06	0.197571
262	2.39091e-05	3.01254e-06	2.00836e-06	0.0796969
263	5.66593e-05	7.13908e-06	4.75938e-06	0.188864
264	2.42662e-05	3.05754e-06	2.03836e-06	0.0808874
265	4.12148e-05	5.19307e-06	3.46205e-06	0.137383
266	5.62798e-05	7.09125e-06	4.7275e-06	0.187599
267	7.87627e-05	9.9241e-06	6.61607e-06	0.262542
268	7.85445e-05	9.89661e-06	6.59774e-06	0.261815
269	5.67357e-05	7.1487e-06	4.7658e-06	0.189119
270	4.37726e-05	5.51535e-06	3.6769e-06	0.145909
271	4.63586e-05	5.84118e-06	3.89412e-06	0.154529
272	4.67045e-05	5.88477e-06	3.92318e-06	0.155682
273	9.98803e-05	1.25849e-05	8.38995e-06	0.332934
274	5.09583e-05	6.42074e-06	4.28049e-06	0.169861
275	5.19052e-05	6.54006e-06	4.36004e-06	0.173017
276	6.2576e-05	7.88458e-06	5.25639e-06	0.208587
277	3.16008e-05	3.9817e-06	2.65447e-06	0.105336
278	6.83345e-05	8.61015e-06	5.7401e-06	0.227782
279	2.0417e-05	2.57255e-06	1.71503e-06	0.0680568
280	0.000123998	1.56237e-05	1.04158e-05	0.413327
281	3.01103e-05	3.7939e-06	2.52926e-06	0.100368
282	6.42173e-05	8.09138e-06	5.39425e-06	0.214058
283	7.20479e-05	9.07804e-06	6.05202e-06	0.24016
284	2.39352e-05	3.01584e-06	2.01056e-06	0.0797842
285	4.73055e-05	5.96049e-06	3.97366e-06	0.157685
286	2.30583e-05	2.90534e-06	1.93689e-06	0.0768609
287	3.78977e-05	4.77511e-06	3.18341e-06	0.126326
288	2.75462e-05	3.47082e-06	2.31388e-06	0.0918207
289	5.38015e-05	6.77898e-06	4.51932e-06	0.179338
290	7.34136e-05	9.25012e-06	6.16674e-06	0.244712
291	5.34612e-05	6.73611e-06	4.49074e-06	0.178204
292	7.30941e-05	9.20985e-06	6.1399e-06	0.243647
293	1.51371e-05	1.90728e-06	1.27152e-06	0.0504571
294	4.07959e-05	5.14028e-06	3.42685e-06	0.135986
295	5.63518e-05	7.10033e-06	4.73355e-06	0.187839
296	4.15996e-05	5.24155e-06	3.49437e-06	0.138665
297	3.34663e-05	4.21675e-06	2.81117e-06	0.111554
298	4.37296e-05	5.50994e-06	3.67329e-06	0.145765
299	4.04456e-05	5.09614e-06	3.39743e-06	0.134819
300	3.42503e-05	4.31554e-06	2.87703e-06	0.114168
301	3.81231e-05	4.80351e-06	3.20234e-06	0.127077
302	7.15458e-05	9.01477e-06	6.00985e-06	0.238486
303	8.38074e-05	1.05597e-05	7.03982e-06	0.279358
304	3.62472e-05	4.56714e-06	3.04476e-06	0.120824
305	3.49252e-05	4.40057e-06	2.93372e-06	0.116417
306	3.35397e-05	4.22601e-06	2.81734e-06	0.111799
307	3.22511e-05	4.06364e-06	2.7091e-06	0.107504
308	2.98063e-05	3.75559e-06	2.50373e-06	0.0993543
309	6.01452e-05	7.5783e-06	5.0522e-06	0.200484
310	5.40948e-05	6.81595e-06	4.54397e-06	0.180316
311	3.81033e-05	4.80101e-06	3.20068e-06	0.127011
312	4.21563e-05	5.31169e-06	3.54113e-06	0.140521
313	3.84073e-05	4.83932e-06	3.22622e-06	0.128024
314	5.7277e-05	7.21691e-06	4.81127e-06	0.190923
315	5.6859e-05	7.16424e-06	4.77616e-06	0.18953
316	4.92472e-05	6.20515e-06	4.13677e-06	0.164157
317	5.03131e-05	6.33945e-06	4.2263e-06	0.16771
318	3.646e-05	4.59396e-06	3.06264e-06	0.121533
319	6.09596e-05	7.68091e-06	5.12061e-06	0.203199
320	2.76822e-05	3.48795e-06	2.3253e-06	0.0922738
321	4.84193e-05	6.10083e-06	4.06722e-06	0.161398
322	3.56099e-05	4.48685e-06	2.99124e-06	0.1187
323	5.48697e-05	6.91358e-06	4.60905e-06	0.182899
324	5.1042e-05	6.43129e-06	4.28753e-06	0.17014
325	4.52958e-05	5.70727e-06	3.80485e-06	0.150986
326	8.36868e-05	1.05445e-05	7.02969e-06	0.278956
327	4.18275e-05	5.27026e-06	3.51351e-06	0.139425
328	5.42651e-05	6.8374e-06	4.55827e-06	0.180884
329	1.95588e-05	2.46441e-06	1.64294e-06	0.0651961
330	5.43684e-05	6.85041e-06	4.56694e-06	0.181228
331	4.31123e-05	5.43215e-06	3.62143e-06	0.143708
332	4.16502e-05	5.24793e-06	3.49862e-06	0.138834
333	3.74783e-05	4.72226e-06	3.14817e-06	0.124928
334	3.0058e-05	3.78731e-06	2.52488e-06	0.100193
335	5.14237e-05	6.47938e-06	4.31959e-06	0.171412
336	1.04695e-05	1.31916e-06	8.79437e-07	0.0348983
337	6.08691e-05	7.66951e-06	5.113e-06	0.202897
338	9.37409e-05	1.18113e-05	7.87423e-06	0.31247
339	3.92938e-05	4.95102e-06	3.30068e-06	0.130979
340	8.38365e-05	1.05634e-05	7.04227e-06	0.279455
341	5.39362e-05	6.79596e-06	4.53064e-06	0.179787
342	3.21856e-05	4.05538e-06	2.70359e-06	0.107285
343	4.43269e-05	5.58519e-06	3.72346e-06	0.147756
344	4.64261e-05	5.84969e-06	3.8998e-06	0.154754
345	3.88864e-05	4.89969e-06	3.26646e-06	0.129621
346	4.74615e-05	5.98015e-06	3.98676e-06	0.158205
347	4.05636e-05	5.11101e-06	3.40734e-06	0.135212
348	1.72234e-05	2.17015e-06	1.44677e-06	0.0574115
349	3.59092e-05	4.52455e-06	3.01637e-06	0.119697
350	3.83328e-05	4.82993e-06	3.21995e-06	0.127776
351	5.26457e-05	6.63336e-06	4.42224e-06	0.175486
352	4.15961e-05	5.24111e-06	3.49407e-06	0.138654
353	9.8842e-05	1.24541e-05	8.30273e-06	0.329473
354	5.72875e-05	7.21823e-06	4.81215e-06	0.190958
355	2.03962e-05	2.56992e-06	1.71328e-06	0.0679874
356	5.72316e-05	7.21118e-06	4.80745e-06	0.190772
357	5.74514e-05	7.23888e-06	4.82592e-06	0.191505
358	7.61376e-05	9.59334e-06	6.39556e-06	0.253792
359	3.32859e-05	4.19402e-06	2.79601e-06	0.110953
360	4.40263e-05	5.54732e-06	3.69821e-06	0.146754
361	6.28167e-05	7.91491e-06	5.2766e-06	0.209389
362	3.79655e-05	4.78365e-06	3.1891e-06	0.126552
363	6.31008e-05	7.9507e-06	5.30047e-06	0.210336
364	5.74936e-05	7.24419e-06	4.82946e-06	0.191645
365	7.3042e-05	9.20329e-06	6.13553e-06	0.243473
366	4.98859e-05	6.28563e-06	4.19042e-06	0.166286
367	6.71451e-05	8.46028e-06	5.64019e-06	0.223817
368	5.53844e-05	6.97844e-06	4.65229e-06	0.184615
369	2.6752e-05	3.37076e-06	2.24717e-06	0.0891734
370	6.68026e-05	8.41712e-06	5.61142e-06	0.222675
371	5.46985e-05	6.89202e-06	4.59468e-06	0.182328
372	3.03796e-05	3.82784e-06	2.55189e-06	0.101265
373	3.15118e-05	3.97049e-06	2.64699e-06	0.105039
374	0.000108441	1.36636e-05	9.10905e-06	0.36147
375	9.70745e-05	1.22314e-05	8.15426e-06	0.323582
376	8.49361e-05	1.07019e-05	7.13463e-06	0.28312
377	0.000161638	2.03664e-05	1.35776e-05	0.538794
378	0.000105439	1.32854e-05	8.85692e-06	0.351465
379	7.2975e-05	9.19485e-06	6.1299e-06	0.24325
380	7.06486e-05	8.90173e-06	5.93449e-06	0.235495
381	4.72901e-05	5.95856e-06	3.97237e-06	0.157634
382	6.10844e-05	7.69664e-06	5.13109e-06	0.203615
383	4.33059e-05	5.45655e-06	3.6377e-06	0.144353
384	5.66895e-05	7.14288e-06	4.76192e-06	0.188965
385	4.22079e-05	5.31819e-06	3.54546e-06	0.140693
386	6.39397e-05	8.0564e-06	5.37093e-06	0.213132
387	5.19571e-05	6.5466e-06	4.3644e-06	0.17319
388	7.79386e-05	9.82027e-06	6.54685e-06	0.259795
389	8.68056e-05	1.09375e-05	7.29167e-06	0.289352
390	7.30881e-05	9.2091e-06	6.1394e-06	0.243627
391	0.00011448	1.44244e-05	9.61629e-06	0.381599
392	7.4287e-05	9.36016e-06	6.24011e-06	0.247623
393	4.33565e-05	5.46292e-06	3.64195e-06	0.144522
394	2.0203e-05	2.54558e-06	1.69706e-06	0.0673435
395	4.72538e-05	5.95399e-06	3.96932e-06	0.157513
396	2.50316e-05	3.15398e-06	2.10265e-06	0.0834386
397	7.81295e-05	9.84432e-06	6.56288e-06	0.260432
398	8.39683e-05	1.058e-05	7.05334e-06	0.279894
399	3.62316e-05	4.56518e-06	3.04345e-06	0.120772
400	7.2587e-05	9.14596e-06	6.0973e-06	0.241957
401	4.81925e-05	6.07226e-06	4.04817e-06	0.160642
402	8.74274e-05	1.10159e-05	7.3439e-06	0.291425
403	4.22729e-05	5.32638e-06	3.55092e-06	0.14091
404	3.26296e-05	4.11133e-06	2.74089e-06	0.108765
405	1.77089e-05	2.23132e-06	1.48755e-06	0.0590296
406	6.59528e-05	8.31006e-06	5.54004e-06	0.219843
407	5.80191e-05	7.31041e-06	4.87361e-06	0.193397
408	7.34652e-05	9.25661e-06	6.17108e-06	0.244884
409	6.59517e-05	8.30992e-06	5.53994e-06	0.219839
410	9.07979e-05	1.14405e-05	7.62702e-06	0.30266
411	3.28486e-05	4.13892e-06	2.75928e-06	0.109495
412	4.88742e-05	6.15815e-06	4.10543e-06	0.162914
413	6.90865e-05	8.7049e-06	5.80327e-06	0.230288
414	0.000115909	1.46045e-05	9.73636e-06	0.386364
415	4.96497e-05	6.25586e-06	4.17057e-06	0.165499
416	5.25696e-05	6.62378e-06	4.41585e-06	0.175232
417	5.3465e-05	6.73659e-06	4.49106e-06	0.178217
418	6.30487e-05	7.94413e-06	5.29609e-06	0.210162
419	5.97099e-05	7.52344e-06	5.01563e-06	0.199033
420	4.01383e-05	5.05743e-06	3.37162e-06	0.133794
421	6.34882e-05	7.99951e-06	5.33301e-06	0.211627
422	4.40074e-05	5.54493e-06	3.69662e-06	0.146691
423	4.88742e-05	6.15815e-06	4.10543e-06	0.162914
424	2.11316e-05	2.66259e-06	1.77506e-06	0.0704388
425	5.65535e-05	7.12574e-06	4.7505e-06	0.188512
426	6.00059e-05	7.56074e-06	5.04049e-06	0.20002
427	3.41116e-05	4.29806e-06	2.86537e-06	0.113705
428	6.28958e-05	7.92487e-06	5.28324e-06	0.209653
429	2.69803e-05	3.39952e-06	2.26635e-06	0.0899344
430	4.9438e-05	6.22919e-06	4.15279e-06	0.164793
431	4.89414e-05	6.16662e-06	4.11108e-06	0.163138
432	4.40202e-05	5.54655e-06	3.6977e-06	0.146734
433	4.14762e-05	5.226e-06	3.484e-06	0.138254
434	4.74862e-05	5.98326e-06	3.98884e-06	0.158287
435	6.78018e-05	8.54303e-06	5.69535e-06	0.226006
436	3.19881e-05	4.03051e-06	2.687e-06	0.106627
437	6.30173e-05	7.94018e-06	5.29345e-06	0.210058
438	3.36943e-05	4.24548e-06	2.83032e-06	0.112314
439	5.61355e-05	7.07307e-06	4.71538e-06	0.187118
440	4.61172e-05	5.81076e-06	3.87384e-06	0.153724
441	7.85641e-05	9.89907e-06	6.59938e-06	0.26188
442	6.68296e-05	8.42053e-06	5.61369e-06	0.222765
443	0.000101683	1.28121e-05	8.54139e-06	0.338944
444	3.50962e-05	4.42212e-06	2.94808e-06	0.116987
445	4.02246e-05	5.0683e-06	3.37887e-06	0.134082
446	4.23295e-05	5.33351e-06	3.55568e-06	0.141098
447	8.42735e-05	1.06185e-05	7.07898e-06	0.280912
448	4.82501e-05	6.07952e-06	4.05301e-06	0.160834
449	3.56613e-05	4.49332e-06	2.99555e-06	0.118871
450	2.80182e-05	3.5303e-06	2.35353e-06	0.0933941
451	5.54936e-05	6.99219e-06	4.66146e-06	0.184979
452	0.000102278	1.2887e-05	8.59134e-06	0.340926
453	6.42393e-05	8.09415e-06	5.3961e-06	0.214131
454	4.79531e-05	6.04209e-06	4.02806e-06	0.159844
455	3.09564e-05	3.90051e-06	2.60034e-06	0.103188
456	3.49937e-05	4.4092e-06	2.93947e-06	0.116646
457	5.92219e-05	7.46196e-06	4.97464e-06	0.197406
458	6.35315e-05	8.00497e-06	5.33665e-06	0.211772
459	9.10692e-05	1.14747e-05	7.64981e-06	0.303564
460	3.27224e-05	4.12303e-06	2.74868e-06	0.109075
461	2.24945e-05	2.83431e-06	1.88954e-06	0.0749817
462	2.42885e-05	3.06036e-06	2.04024e-06	0.0809618
463	3.21991e-05	4.05709e-06	2.70473e-06	0.10733
464	0.000102464	1.29105e-05	8.607e-06	0.341548
465	6.32475e-05	7.96918e-06	5.31279e-06	0.210825
466	6.41679e-05	8.08515e-06	5.3901e-06	0.213893
467	6.1622e-05	7.76437e-06	5.17625e-06	0.205407
468	4.92131e-05	6.20084e-06	4.1339e-06	0.164044
469	6.61379e-05	8.33338e-06	5.55558e-06	0.22046
470	4.98858e-05	6.28561e-06	4.1904e-06	0.166286
471	9.80416e-05	1.23532e-05	8.23549e-06	0.326805
472	5.6126e-05	7.07187e-06	4.71458e-06	0.187087
473	3.46434e-05	4.36507e-06	2.91005e-06	0.115478
474	1.87024e-05	2.35651e-06	1.571e-06	0.0623414
475	5.6335e-05	7.09821e-06	4.73214e-06	0.187783
476	7.16276e-05	9.02508e-06	6.01672e-06	0.238759
477	3.57898e-05	4.50951e-06	3.00634e-06	0.119299
478	6.45631e-05	8.13495e-06	5.4233e-06	0.21521
479	8.72006e-05	1.09873e-05	7.32485e-06	0.290669
480	6.90618e-05	8.70178e-06	5.80119e-06	0.230206
481	2.76024e-05	3.4779e-06	2.3186e-06	0.0920081
482	0.000101315	1.27657e-05	8.51048e-06	0.337718
483	5.59664e-05	7.05177e-06	4.70118e-06	0.186555
484	2.14351e-05	2.70083e-06	1.80055e-06	0.0714505
485	3.99477e-05	5.03342e-06	3.35561e-06	0.133159
486	5.76181e-05	7.25988e-06	4.83992e-06	0.19206
487	2.89958e-05	3.65347e-06	2.43565e-06	0.0966527
488	5.7719e-05	7.2726e-06	4.8484e-06	0.192397
489	7.43649e-05	9.36998e-06	6.24665e-06	0.247883
490	4.63033e-05	5.83421e-06	3.88948e-06	0.154344
491	3.87888e-05	4.88739e-06	3.25826e-06	0.129296
492	7.23445e-05	9.11541e-06	6.07694e-06	0.241148
493	7.27101e-05	9.16148e-06	6.10765e-06	0.242367
494	2.25582e-05	2.84234e-06	1.89489e-06	0.0751941
495	7.22205e-05	9.09978e-06	6.06652e-06	0.240735
496	4.80075e-05	6.04894e-06	4.03263e-06	0.160025
497	5.98716e-05	7.54382e-06	5.02921e-06	0.199572
498	6.04219e-05	7.61316e-06	5.07544e-06	0.201406
499	5.55109e-05	6.99437e-06	4.66291e-06	0.185036
500	0.00010567	1.33145e-05	8.87631e-06	0.352235
501	3.30682e-05	4.16659e-06	2.77773e-06	0.110227
502	7.28499e-05	9.17908e-06	6.11939e-06	0.242833
503	6.81363e-05	8.58517e-06	5.72345e-06	0.227121
504	7.50808e-05	9.46018e-06	6.30679e-06	0.250269
505	4.34898e-05	5.47971e-06	3.65314e-06	0.144966
506	2.17833e-05	2.7447e-06	1.8298e-06	0.072611
507	4.88803e-05	6.15892e-06	4.10595e-06	0.162934
508	9.23685e-05	1.16384e-05	7.75896e-06	0.307895
509	4.54452e-05	5.7261e-06	3.8174e-06	0.151484
510	8.02516e-05	1.01117e-05	6.74113e-06	0.267505
511	4.76582e-05	6.00494e-06	4.00329e-06	0.158861
512	7.17132e-05	9.03586e-06	6.02391e-06	0.239044
513	7.93957e-05	1.00039e-05	6.66924e-06	0.264652
514	6.9537e-05	8.76166e-06	5.84111e-06	0.23179
515	2.43709e-05	3.07074e-06	2.04716e-06	0.0812364
516	3.7016e-05	4.66402e-06	3.10934e-06	0.123387
517	4.5153e-05	5.68927e-06	3.79285e-06	0.15051
518	4.37545e-05	5.51307e-06	3.67538e-06	0.145848
519	8.29529e-05	1.04521e-05	6.96804e-06	0.27651
520	3.29311e-05	4.14932e-06	2.76622e-06	0.10977
521	3.32661e-05	4.19153e-06	2.79435e-06	0.110887
522	2.16088e-05	2.7227e-06	1.81514e-06	0.0720292
523	0.000100752	1.26947e-05	8.46314e-06	0.335839
524	4.70638e-05	5.93004e-06	3.95336e-06	0.156879
525	6.02326e-05	7.58931e-06	5.05954e-06	0.200775
526	7.1285e-05	8.98191e-06	5.98794e-06	0.237617
527	2.65305e-05	3.34284e-06	2.22856e-06	0.0884349
528	6.8973e-05	8.69059e-06	5.79373e-06	0.22991
529	3.76134e-05	4.73929e-06	3.15953e-06	0.125378
530	5.12335e-05	6.45542e-06	4.30361e-06	0.170778
531	4.5378e-05	5.71763e-06	3.81175e-06	0.15126
532	5.42153e-05	6.83113e-06	4.55409e-06	0.180718
533	6.84848e-05	8.62908e-06	5.75272e-06	0.228283
534	3.53838e-05	4.45836e-06	2.97224e-06	0.117946
535	7.30568e-05	9.20515e-06	6.13677e-06	0.243523
536	3.4808e-05	4.38581e-06	2.92387e-06	0.116027
537	5.36398e-05	6.75861e-06	4.50574e-06	0.178799
538	6.107e-05	7.69482e-06	5.12988e-06	0.203567
539	2.87803e-05	3.62632e-06	2.41755e-06	0.0959345
540	3.55891e-05	4.48422e-06	2.98948e-06	0.11863
541	1.98898e-05	2.50612e-06	1.67074e-06	0.0662994
542	5.97521e-05	7.52877e-06	5.01918e-06	0.199174
543	5.73569e-05	7.22697e-06	4.81798e-06	0.19119
544	2.93507e-05	3.69819e-06	2.46546e-06	0.0978356
545	6.37429e-05	8.0316e-06	5.3544e-06	0.212476
546	4.17433e-05	5.25966e-06	3.50644e-06	0.139144
547	5.66581e-05	7.13892e-06	4.75928e-06	0.18886
548	5.18631e-05	6.53475e-06	4.3565e-06	0.172877
549	4.47574e-05	5.63943e-06	3.75962e-06	0.149191
550	3.50619e-05	4.4178e-06	2.9452e-06	0.116873
551	2.91635e-05	3.6746e-06	2.44973e-06	0.0972116
552	4.62757e-05	5.83073e-06	3.88716e-06	0.154252
553	5.3893e-05	6.79051e-06	4.52701e-06	0.179643
554	5.67489e-05	7.15036e-06	4.76691e-06	0.189163
555	2.84807e-05	3.58857e-06	2.39238e-06	0.0949356
556	5.50453e-05	6.93571e-06	4.62381e-06	0.183484
557	6.01328e-05	7.57673e-06	5.05115e-06	0.200443
558	5.64121e-05	7.10793e-06	4.73862e-06	0.18804
559	5.18637e-05	6.53482e-06	4.35655e-06	0.172879
560	4.04556e-05	5.09741e-06	3.39827e-06	0.134852
561	4.09668e-05	5.16181e-06	3.44121e-06	0.136556
562	4.62081e-05	5.82223e-06	3.88148e-06	0.154027
563	2.23913e-05	2.82131e-06	1.88087e-06	0.0746378
564	8.48136e-05	1.06865e-05	7.12434e-06	0.282712
565	8.44433e-05	1.06399e-05	7.09324e-06	0.281478
566	3.65055e-05	4.59969e-06	3.06646e-06	0.121685
567	4.76781e-05	6.00744e-06	4.00496e-06	0.158927
568	5.31837e-05	6.70115e-06	4.46743e-06	0.177279
569	7.03536e-05	8.86456e-06	5.90971e-06	0.234512
570	7.31491e-05	9.21679e-06	6.14452e-06	0.24383
571	5.54986e-05	6.99283e-06	4.66189e-06	0.184995
572	4.77221e-05	6.01298e-06	4.00865e-06	0.159074
573	5.10508e-05	6.4324e-06	4.28826e-06	0.170169
574	6.22901e-05	7.84855e-06	5.23237e-06	0.207634
575	5.6001e-05	7.05613e-06	4.70409e-06	0.18667
576	7.69827e-05	9.69982e-06	6.46654e-06	0.256609
577	3.84131e-05	4.84006e-06	3.2267e-06	0.128044
578	5.41093e-05	6.81777e-06	4.54518e-06	0.180364
579	4.52814e-05	5.70545e-06	3.80363e-06	0.150938
580	4.50057e-05	5.67071e-06	3.78048e-06	0.150019
581	3.94937e-05	4.9762e-06	3.31747e-06	0.131646
582	4.69035e-05	5.90984e-06	3.93989e-06	0.156345
583	6.4794e-05	8.16405e-06	5.4427e-06	0.21598
584	4.08039e-05	5.1413e-06	3.42753e-06	0.136013
585	6.20907e-05	7.82342e-06	5.21562e-06	0.206969
586	5.16344e-05	6.50594e-06	4.33729e-06	0.172115
587	7.25225e-05	9.13784e-06	6.09189e-06	0.241742
588	6.60517e-05	8.32252e-06	5.54835e-06	0.220172
589	8.49846e-05	1.07081e-05	7.13871e-06	0.283282
590	4.9576e-05	6.24658e-06	4.16438e-06	0.165253
591	2.71585e-05	3.42197e-06	2.28131e-06	0.0905282
592	3.28326e-05	4.13691e-06	2.75794e-06	0.109442
593	1.75433e-05	2.21045e-06	1.47363e-06	0.0584775
594	5.71337e-05	7.19884e-06	4.79923e-06	0.190446
595	2.11973e-05	2.67086e-06	1.78057e-06	0.0706576
596	6.96986e-05	8.78203e-06	5.85469e-06	0.232329
597	1.81924e-05	2.29224e-06	1.52816e-06	0.0606413
598	1.51832e-05	1.91308e-06	1.27539e-06	0.0506107
599	6.54592e-05	8.24786e-06	5.49858e-06	0.218197
600	9.90859e-05	1.24848e-05	8.32322e-06	0.330286
601	2.95084e-05	3.71806e-06	2.47871e-06	0.0983615
602	5.22617e-05	6.58497e-06	4.38998e-06	0.174206
603	0.000103349	1.3022e-05	8.68132e-06	0.344497
604	3.52264e-05	4.43853e-06	2.95902e-06	0.117421
605	3.8125e-05	4.80375e-06	3.2025e-06	0.127083
606	4.30107e-05	5.41934e-06	3.61289e-06	0.143369
607	9.85693e-05	1.24197e-05	8.27982e-06	0.328564
608	5.65481e-05	7.12506e-06	4.75004e-06	0.188494
609	2.72958e-05	3.43928e-06	2.29285e-06	0.0909861
610	9.22081e-05	1.16182e-05	7.74548e-06	0.30736
611	5.85178e-05	7.37325e-06	4.9155e-06	0.195059
612	3.76588e-05	4.74501e-06	3.16334e-06	0.125529
613	2.67656e-05	3.37247e-06	2.24831e-06	0.0892188
614	8.53829e-05	1.07582e-05	7.17216e-06	0.28461
615	6.70803e-05	8.45212e-06	5.63475e-06	0.223601
616	3.98688e-05	5.02346e-06	3.34898e-06	0.132896
617	2.50075e-05	3.15094e-06	2.10063e-06	0.0833582
618	5.71803e-05	7.20471e-06	4.80314e-06	0.190601
619	0.000100378	1.26476e-05	8.43176e-06	0.334594
620	3.83771e-05	4.83551e-06	3.22368e-06	0.127924
621	3.29919e-05	4.15698e-06	2.77132e-06	0.109973
622	3.50626e-05	4.41789e-06	2.94526e-06	0.116875
623	4.31965e-05	5.44275e-06	3.6285e-06	0.143988
624	2.30131e-05	2.89966e-06	1.9331e-06	0.0767105
625	3.27615e-05	4.12794e-06	2.75196e-06	0.109205
626	6.05343e-05	7.62732e-06	5.08488e-06	0.201781
627	3.22169e-05	4.05934e-06	2.70622e-06	0.10739
628	6.66111e-05	8.393e-06	5.59533e-06	0.222037
629	4.59842e-05	5.794e-06	3.86267e-06	0.153281
630	5.56927e-05	7.01728e-06	4.67819e-06	0.185642
631	4.33968e-05	5.468e-06	3.64533e-06	0.144656
632	4.78989e-05	6.03527e-06	4.02351e-06	0.159663
633	4.00548e-05	5.04691e-06	3.3646e-06	0.133516
634	7.55889e-05	9.5242e-06	6.34947e-06	0.251963
635	0.000116424	1.46694e-05	9.7796e-06	0.388079
636	7.38847e-05	9.30947e-06	6.20631e-06	0.246282
637	3.87384e-05	4.88104e-06	3.25403e-06	0.129128
638	6.17824e-05	7.78458e-06	5.18972e-06	0.205941
639	6.1258e-05	7.71851e-06	5.14567e-06	0.204193
640	3.46711e-05	4.36856e-06	2.91237e-06	0.11557
641	6.29478e-05	7.93142e-06	5.28761e-06	0.209826
642	5.79048e-05	7.29601e-06	4.864e-06	0.193016
643	9.56396e-05	1.20506e-05	8.03373e-06	0.318799
644	5.22025e-05	6.57752e-06	4.38501e-06	0.174008
645	9.41355e-05	1.18611e-05	7.90738e-06	0.313785
646	8.82763e-05	1.11228e-05	7.41521e-06	0.294254
647	7.93656e-05	1.00001e-05	6.66671e-06	0.264552
648	2.49479e-05	3.14343e-06	2.09562e-06	0.0831595
649	3.05524e-05	3.8496e-06	2.5664e-06	0.101841
650	3.61882e-05	4.55972e-06	3.03981e-06	0.120627
651	4.19438e-05	5.28492e-06	3.52328e-06	0.139813
652	4.5184e-05	5.69318e-06	3.79546e-06	0.150613
653	7.74778e-05	9.7622e-06	6.50814e-06	0.258259
654	1.13037e-05	1.42427e-06	9.49515e-07	0.0376792
655	3.36081e-05	4.23462e-06	2.82308e-06	0.112027
656	2.1613e-05	2.72323e-06	1.81549e-06	0.0720432
657	1.97575e-05	2.48944e-06	1.65963e-06	0.0658582
658	4.86924e-05	6.13524e-06	4.09016e-06	0.162308
659	4.52863e-05	5.70607e-06	3.80405e-06	0.150954
660	5.51943e-05	6.95448e-06	4.63632e-06	0.183981
661	2.16296e-05	2.72532e-06	1.81688e-06	0.0720985
662	3.97656e-05	5.01046e-06	3.34031e-06	0.132552
663	6.60263e-05	8.31931e-06	5.54621e-06	0.220088
664	4.33043e-05	5.45635e-06	3.63756e-06	0.144348
665	6.25427e-05	7.88038e-06	5.25358e-06	0.208476
666	2.16432e-05	2.72704e-06	1.81803e-06	0.072144
667	9.08979e-05	1.14531e-05	7.63542e-06	0.302993
668	6.29319e-05	7.92942e-06	5.28628e-06	0.209773
669	3.2104e-05	4.0451e-06	2.69674e-06	0.107013
670	8.38354e-05	1.05633e-05	7.04217e-06	0.279451
671	5.89771e-05	7.43111e-06	4.95407e-06	0.19659
672	0.000107435	1.35368e-05	9.02452e-06	0.358116
673	3.64429e-05	4.59181e-06	3.06121e-06	0.121476
674	5.20045e-05	6.55256e-06	4.36838e-06	0.173348
675	5.83545e-05	7.35267e-06	4.90178e-06	0.194515
676	3.82071e-05	4.8141e-06	3.2094e-06	0.127357
677	0.000113635	1.4318e-05	9.54533e-06	0.378783
678	5.52103e-05	6.95649e-06	4.63766e-06	0.184034
679	6.1588e-05	7.76008e-06	5.17339e-06	0.205293
680	6.16313e-05	7.76555e-06	5.17703e-06	0.205438
681	8.62233e-05	1.08641e-05	7.24276e-06	0.287411
682	7.42384e-05	9.35403e-06	6.23602e-06	0.247461
683	3.60759e-05	4.54557e-06	3.03038e-06	0.120253
684	4.00145e-05	5.04182e-06	3.36121e-06	0.133382
685	7.75372e-05	9.76968e-06	6.51312e-06	0.258457
686	3.27914e-05	4.13171e-06	2.75448e-06	0.109305
687	8.52097e-05	1.07364e-05	7.15761e-06	0.284032
688	8.45082e-05	1.0648e-05	7.09869e-06	0.281694
689	5.07178e-05	6.39045e-06	4.2603e-06	0.169059
690	3.85503e-05	4.85734e-06	3.23823e-06	0.128501
691	7.01343e-05	8.83692e-06	5.89128e-06	0.233781
692	4.93416e-05	6.21704e-06	4.14469e-06	0.164472
693	5.01166e-05	6.3147e-06	4.2098e-06	0.167055
694	5.92802e-05	7.4693e-06	4.97954e-06	0.197601
695	3.87488e-05	4.88234e-06	3.2549e-06	0.129163
696	5.1804e-05	6.5273e-06	4.35153e-06	0.17268
697	5.00809e-05	6.31019e-06	4.2068e-06	0.166936
698	6.72699e-05	8.47601e-06	5.65067e-06	0.224233
699	3.93616e-05	4.95956e-06	3.30637e-06	0.131205
700	5.94989e-05	7.49686e-06	4.99791e-06	0.19833
701	3.71978e-05	4.68693e-06	3.12462e-06	0.123993
702	4.0006e-05	5.04075e-06	3.3605e-06	0.133353
703	8.86091e-05	1.11647e-05	7.44316e-06	0.295364
704	2.68452e-05	3.3825e-06	2.255e-06	0.0894841
705	6.68878e-05	8.42786e-06	5.61857e-06	0.222959
706	1.74249e-05	2.19554e-06	1.46369e-06	0.058083
707	5.90184e-05	7.43632e-06	4.95755e-06	0.196728
708	4.64495e-05	5.85264e-06	3.90176e-06	0.154832
709	5.51439e-05	6.94813e-06	4.63209e-06	0.183813
710	5.11988e-05	6.45105e-06	4.3007e-06	0.170663
711	3.96539e-05	4.99639e-06	3.33093e-06	0.13218
712	4.81087e-05	6.06169e-06	4.04113e-06	0.160362
713	6.61006e-05	8.32867e-06	5.55245e-06	0.220335
714	5.30156e-05	6.67997e-06	4.45331e-06	0.176719
715	3.48138e-05	4.38653e-06	2.92436e-06	0.116046
716	7.88758e-05	9.93834e-06	6.62556e-06	0.262919
717	6.10191e-05	7.68841e-06	5.12561e-06	0.203397
718	8.41517e-05	1.06031e-05	7.06874e-06	0.280506
719	7.62244e-05	9.60427e-06	6.40285e-06	0.254081
720	2.70578e-05	3.40928e-06	2.27286e-06	0.0901927
721	3.80247e-05	4.79112e-06	3.19408e-06	0.126749
722	4.17207e-05	5.25681e-06	3.50454e-06	0.139069
723	7.67365e-05	9.6688e-06	6.44586e-06	0.255788
724	3.85662e-05	4.85934e-06	3.23956e-06	0.128554
725	3.53282e-05	4.45135e-06	2.96757e-06	0.117761
726	4.09343e-05	5.15773e-06	3.43848e-06	0.136448
727	6.67032e-05	8.4046e-06	5.60307e-06	0.222344
728	4.18521e-05	5.27336e-06	3.51558e-06	0.139507
729	3.68153e-05	4.63873e-06	3.09249e-06	0.122718
730	8.15829e-05	1.02794e-05	6.85296e-06	0.271943
731	7.23736e-05	9.11908e-06	6.07938e-06	0.241245
732	5.48677e-05	6.91333e-06	4.60888e-06	0.182892
733	4.51399e-05	5.68762e-06	3.79175e-06	0.150466
734	2.08392e-05	2.62574e-06	1.75049e-06	0.0694641
735	3.45243e-05	4.35006e-06	2.90004e-06	0.115081
736	6.86413e-05	8.64881e-06	5.76587e-06	0.228804
737	7.00721e-05	8.82908e-06	5.88605e-06	0.233574
738	4.29937e-05	5.4172e-06	3.61147e-06	0.143312
739	2.26849e-05	2.8583e-06	1.90553e-06	0.0756163
740	6.69731e-05	8.43861e-06	5.62574e-06	0.223244
741	1.65647e-05	2.08715e-06	1.39144e-06	0.0552157
742	4.26094e-05	5.36878e-06	3.57919e-06	0.142031
743	3.35702e-05	4.22985e-06	2.8199e-06	0.111901
744	3.59794e-05	4.5334e-06	3.02227e-06	0.119931
745	8.86371e-05	1.11683e-05	7.44552e-06	0.295457
746	2.53041e-05	3.18831e-06	2.12554e-06	0.0843469
747	5.74727e-05	7.24156e-06	4.82771e-06	0.191576
748	5.57548e-05	7.0251e-06	4.6834e-06	0.185849
749	1.67975e-05	2.11648e-06	1.41099e-06	0.0559917
750	7.72128e-05	9.72881e-06	6.48587e-06	0.257376
751	7.14851e-05	9.00712e-06	6.00475e-06	0.238284
752	5.05536e-05	6.36975e-06	4.2465e-06	0.168512
753	6.35664e-05	8.00936e-06	5.33957e-06	0.211888
754	3.53914e-05	4.45932e-06	2.97288e-06	0.117971
755	8.89368e-05	1.1206e-05	7.47069e-06	0.296456
756	9.89901e-05	1.24728e-05	8.31517e-06	0.329967
757	5.71092e-05	7.19577e-06	4.79718e-06	0.190364
758	8.74272e-05	1.10158e-05	7.34389e-06	0.291424
759	4.14402e-05	5.22146e-06	3.48097e-06	0.138134
760	7.39705e-05	9.32028e-06	6.21352e-06	0.246568
761	5.13674e-05	6.47229e-06	4.31486e-06	0.171225
762	4.51683e-05	5.69121e-06	3.79414e-06	0.150561
763	2.82651e-05	3.5614e-06	2.37427e-06	0.094217
764	2.08781e-05	2.63064e-06	1.75376e-06	0.0695937
765	0.000107167	1.35031e-05	9.00204e-06	0.357224
766	5.32264e-05	6.70652e-06	4.47101e-06	0.177421
767	3.2061e-05	4.03969e-06	2.69313e-06	0.10687
768	6.38276e-05	8.04227e-06	5.36152e-06	0.212759
769	3.33475e-05	4.20179e-06	2.80119e-06	0.111158
770	5.85036e-05	7.37146e-06	4.91431e-06	0.195012
771	5.56801e-05	7.01569e-06	4.67712e-06	0.1856
772	6.45308e-05	8.13088e-06	5.42059e-06	0.215103
773	4.57037e-05	5.75867e-06	3.83911e-06	0.152346
774	7.59783e-05	9.57327e-06	6.38218e-06	0.253261
775	6.42784e-05	8.09908e-06	5.39939e-06	0.214261
776	3.30246e-05	4.1611e-06	2.77407e-06	0.110082
777	3.78377e-05	4.76755e-06	3.17837e-06	0.126126
778	2.87855e-05	3.62698e-06	2.41799e-06	0.0959518
779	6.1153e-05	7.70528e-06	5.13685e-06	0.203843
780	4.44637e-05	5.60242e-06	3.73495e-06	0.148212
781	8.18192e-05	1.03092e-05	6.87281e-06	0.272731
782	2.57238e-05	3.2412e-06	2.1608e-06	0.085746
783	4.05624e-05	5.11086e-06	3.40724e-06	0.135208
784	2.82837e-05	3.56375e-06	2.37583e-06	0.0942791
785	4.15553e-05	5.23597e-06	3.49064e-06	0.138518
786	5.56444e-05	7.01119e-06	4.67413e-06	0.185481
787	0.000112957	1.42326e-05	9.48837e-06	0.376523
788	8.79964e-05	1.10875e-05	7.39169e-06	0.293321
789	6.75282e-05	8.50856e-06	5.67237e-06	0.225094
790	8.19812e-05	1.03296e-05	6.88642e-06	0.273271
791	6.5199e-05	8.21508e-06	5.47672e-06	0.21733
792	5.65351e-05	7.12343e-06	4.74895e-06	0.18845
793	2.63358e-05	3.31831e-06	2.21221e-06	0.0877861
794	7.25865e-05	9.14589e-06	6.09726e-06	0.241955
795	0.000110023	1.38628e-05	9.2419e-06	0.366742
796	5.0698e-05	6.38795e-06	4.25863e-06	0.168993
797	7.67038e-05	9.66469e-06	6.44312e-06	0.255679
798	5.8156e-05	7.32766e-06	4.8851e-06	0.193853
799	7.28914e-05	9.18432e-06	6.12288e-06	0.242971
800	0.000104102	1.31168e-05	8.74454e-06	0.347006
801	7.10419e-05	8.95127e-06	5.96752e-06	0.236806
802	5.15088e-05	6.49011e-06	4.32674e-06	0.171696
803	3.68281e-05	4.64034e-06	3.09356e-06	0.12276
804	2.5316e-05	3.18982e-06	2.12654e-06	0.0843867
805	5.52454e-05	6.96092e-06	4.64061e-06	0.184151
806	4.23351e-05	5.33423e-06	3.55615e-06	0.141117
807	2.33401e-05	2.94086e-06	1.96057e-06	0.0778005
808	3.435e-05	4.32811e-06	2.8854e-06	0.1145
809	4.35447e-05	5.48663e-06	3.65775e-06	0.145149
810	3.64879e-05	4.59748e-06	3.06498e-06	0.121626
811	3.52718e-05	4.44425e-06	2.96283e-06	0.117573
812	9.33653e-05	1.1764e-05	7.84269e-06	0.311218
813	2.47406e-05	3.11731e-06	2.07821e-06	0.0824686
814	4.28922e-05	5.40442e-06	3.60295e-06	0.142974
815	3.22895e-05	4.06848e-06	2.71232e-06	0.107632
816	8.37402e-05	1.05513e-05	7.03418e-06	0.279134
817	8.49275e-05	1.07009e-05	7.13391e-06	0.283092
818	6.03972e-05	7.61005e-06	5.07336e-06	0.201324
819	5.06619e-05	6.3834e-06	4.2556e-06	0.168873
820	4.73466e-05	5.96568e-06	3.97712e-06	0.157822
821	7.13652e-05	8.99201e-06	5.99467e-06	0.237884
822	4.00145e-05	5.04182e-06	3.36122e-06	0.133382
823	4.02152e-05	5.06712e-06	3.37808e-06	0.134051
824	0.000111757	1.40814e-05	9.38758e-06	0.372523
825	7.6282e-05	9.61154e-06	6.40769e-06	0.254273
826	3.50176e-05	4.41222e-06	2.94148e-06	0.116725
827	4.99876e-05	6.29844e-06	4.19896e-06	0.166625
828	2.71472e-05	3.42055e-06	2.28036e-06	0.0904906
829	5.50124e-05	6.93156e-06	4.62104e-06	0.183375
830	3.24644e-05	4.09052e-06	2.72701e-06	0.108215
831	5.55619e-05	7.0008e-06	4.6672e-06	0.185206
832	8.67929e-05	1.09359e-05	7.29061e-06	0.28931
833	4.73583e-05	5.96714e-06	3.97809e-06	0.157861
834	4.18103e-05	5.2681e-06	3.51206e-06	0.139368
835	6.05264e-05	7.62632e-06	5.08421e-06	0.201755
836	6.90649e-05	8.70218e-06	5.80145e-06	0.230216
837	2.39676e-05	3.01991e-06	2.01328e-06	0.0798919
838	2.99132e-05	3.76907e-06	2.51271e-06	0.0997107
839	0.000117932	1.48594e-05	9.90628e-06	0.393106
840	5.55544e-05	6.99985e-06	4.66657e-06	0.185181
841	4.0656e-05	5.12265e-06	3.4151e-06	0.13552
842	3.3598e-05	4.23335e-06	2.82223e-06	0.111993
843	6.48103e-05	8.16609e-06	5.44406e-06	0.216034
844	4.59486e-05	5.78952e-06	3.85968e-06	0.153162
845	5.4206e-05	6.82996e-06	4.55331e-06	0.180687
846	3.04632e-05	3.83836e-06	2.55891e-06	0.101544
847	1.87611e-05	2.3639e-06	1.57593e-06	0.062537
848	3.3519e-05	4.2234e-06	2.8156e-06	0.11173
849	1.94839e-05	2.45497e-06	1.63664e-06	0.0649462
850	6.26715e-05	7.89661e-06	5.26441e-06	0.208905
851	6.50995e-05	8.20253e-06	5.46835e-06	0.216998
852	7.04936e-05	8.88219e-06	5.92146e-06	0.234979
853	2.69379e-05	3.39417e-06	2.26278e-06	0.089793
854	7.98964e-05	1.0067e-05	6.7113e-06	0.266321
855	5.79479e-05	7.30143e-06	4.86762e-06	0.19316
856	4.99128e-05	6.28902e-06	4.19268e-06	0.166376
857	3.33826e-05	4.20621e-06	2.80414e-06	0.111275
858	9.80749e-05	1.23574e-05	8.23829e-06	0.326916
859	5.284e-05	6.65784e-06	4.43856e-06	0.176133
860	2.50429e-05	3.15541e-06	2.1036e-06	0.0834764
861	4.14362e-05	5.22096e-06	3.48064e-06	0.138121
862	4.09152e-05	5.15531e-06	3.43687e-06	0.136384
863	5.71132e-05	7.19627e-06	4.79751e-06	0.190377
864	5.31894e-05	6.70187e-06	4.46791e-06	0.177298
865	1.66826e-05	2.10201e-06	1.40134e-06	0.0556088
866	4.27099e-05	5.38144e-06	3.58763e-06	0.142366
867	5.09591e-05	6.42085e-06	4.28057e-06	0.169864
868	6.05627e-05	7.6309e-06	5.08727e-06	0.201876
869	2.98178e-05	3.75705e-06	2.5047e-06	0.0993928
870	6.39936e-05	8.06319e-06	5.37546e-06	0.213312
871	2.65816e-05	3.34928e-06	2.23285e-06	0.0886053
872	2.74497e-05	3.45866e-06	2.30577e-06	0.0914989
873	4.55941e-05	5.74485e-06	3.8299e-06	0.15198
874	6.52276e-05	8.21867e-06	5.47911e-06	0.217425
875	6.20839e-05	7.82257e-06	5.21505e-06	0.206946
876	2.61282e-05	3.29216e-06	2.19477e-06	0.0870941
877	2.07887e-05	2.61938e-06	1.74625e-06	0.0692957
878	7.85443e-05	9.89659e-06	6.59772e-06	0.261814
879	5.0344e-05	6.34335e-06	4.2289e-06	0.167813
880	4.26391e-05	5.37253e-06	3.58169e-06	0.14213
881	4.93565e-05	6.21892e-06	4.14595e-06	0.164522
882	8.60803e-05	1.08461e-05	7.23074e-06	0.286934
883	8.21151e-05	1.03465e-05	6.89767e-06	0.273717
884	5.60592e-05	7.06346e-06	4.70897e-06	0.186864
885	1.70899e-05	2.15332e-06	1.43555e-06	0.0569662
886	4.3002e-05	5.41825e-06	3.61217e-06	0.14334
887	4.58053e-05	5.77147e-06	3.84765e-06	0.152684
888	3.35427e-05	4.22638e-06	2.81759e-06	0.111809
889	4.92039e-05	6.1997e-06	4.13313e-06	0.164013
890	6.20695e-05	7.82075e-06	5.21383e-06	0.206898
891	5.14801e-05	6.48649e-06	4.32433e-06	0.1716
892	4.87946e-05	6.14812e-06	4.09875e-06	0.162649
893	3.71387e-05	4.67947e-06	3.11965e-06	0.123796
894	2.37693e-05	2.99493e-06	1.99662e-06	0.0792309
895	5.65727e-05	7.12816e-06	4.75211e-06	0.188576
896	3.7186e-05	4.68544e-06	3.12363e-06	0.123953
897	4.69323e-05	5.91347e-06	3.94232e-06	0.156441
898	3.81395e-05	4.80558e-06	3.20372e-06	0.127132
899	4.39381e-05	5.5362e-06	3.6908e-06	0.14646
900	2.97929e-05	3.7539e-06	2.5026e-06	0.0993096
901	5.48347e-05	6.90918e-06	4.60612e-06	0.182782
902	4.71987e-05	5.94704e-06	3.96469e-06	0.157329
903	0.00015201	1.91533e-05	1.27689e-05	0.506702
904	3.56713e-05	4.49459e-06	2.99639e-06	0.118904
905	4.45148e-05	5.60887e-06	3.73924e-06	0.148383
906	6.06772e-05	7.64533e-06	5.09689e-06	0.202257
907	3.80596e-05	4.79551e-06	3.197e-06	0.126865
908	2.56505e-05	3.23196e-06	2.15464e-06	0.0855017
909	2.58093e-05	3.25198e-06	2.16798e-06	0.0860311
910	3.38129e-05	4.26042e-06	2.84028e-06	0.11271
911	6.48235e-05	8.16776e-06	5.44517e-06	0.216078
912	2.78452e-05	3.50849e-06	2.33899e-06	0.0928172
913	4.61066e-05	5.80943e-06	3.87295e-06	0.153689
914	5.47675e-05	6.9007e-06	4.60047e-06	0.182558
915	4.2701e-05	5.38033e-06	3.58689e-06	0.142337
916	9.0687e-05	1.14266e-05	7.6177e-06	0.30229
917	7.21735e-05	9.09386e-06	6.06257e-06	0.240578
918	3.60348e-05	4.54038e-06	3.02692e-06	0.120116
919	3.63452e-05	4.57949e-06	3.05299e-06	0.121151
920	2.31415e-05	2.91583e-06	1.94388e-06	0.0771382
921	5.36041e-05	6.75411e-06	4.50274e-06	0.17868
922	8.1072e-05	1.02151e-05	6.81004e-06	0.27024
923	5.86633e-05	7.39158e-06	4.92772e-06	0.195544
924	5.48103e-05	6.9061e-06	4.60406e-06	0.182701
925	5.39986e-05	6.80382e-06	4.53588e-06	0.179995
926	1.84142e-05	2.32019e-06	1.54679e-06	0.0613807
927	8.51976e-05	1.07349e-05	7.1566e-06	0.283992
928	2.34119e-05	2.9499e-06	1.9666e-06	0.0780396
929	2.54162e-05	3.20244e-06	2.13496e-06	0.0847207
930	4.66095e-05	5.8728e-06	3.9152e-06	0.155365
931	7.92839e-05	9.98977e-06	6.65985e-06	0.26428
932	7.27474e-05	9.16618e-06	6.11078e-06	0.242491
933	6.50388e-05	8.19489e-06	5.46326e-06	0.216796
934	9.30356e-05	1.17225e-05	7.81499e-06	0.310119
935	5.19267e-05	6.54276e-06	4.36184e-06	0.173089
936	6.61074e-05	8.32954e-06	5.55303e-06	0.220358
937	4.68617e-05	5.90457e-06	3.93638e-06	0.156206
938	2.9717e-05	3.74434e-06	2.49622e-06	0.0990565
939	3.06254e-05	3.85881e-06	2.57254e-06	0.102085
940	3.19856e-05	4.03019e-06	2.68679e-06	0.106619
941	5.04334e-05	6.35461e-06	4.2364e-06	0.168111
942	4.57879e-05	5.76928e-06	3.84619e-06	0.152626
943	4.04843e-05	5.10102e-06	3.40068e-06	0.134948
944	5.16443e-05	6.50718e-06	4.33812e-06	0.172148
945	6.38594e-05	8.04629e-06	5.36419e-06	0.212865
946	4.1987e-05	5.29037e-06	3.52691e-06	0.139957
947	3.62643e-05	4.5693e-06	3.0462e-06	0.120881
948	5.60043e-05	7.05654e-06	4.70436e-06	0.186681
949	3.99183e-05	5.0297e-06	3.35314e-06	0.133061
950	3.75381e-05	4.7298e-06	3.1532e-06	0.125127
951	6.42603e-05	8.0968e-06	5.39786e-06	0.214201
952	2.78782e-05	3.51266e-06	2.34177e-06	0.0929275
953	3.81376e-05	4.80534e-06	3.20356e-06	0.127125
954	4.38556e-05	5.52581e-06	3.68387e-06	0.146185
955	8.50407e-05	1.07151e-05	7.14342e-06	0.283469
956	5.18189e-05	6.52918e-06	4.35279e-06	0.17273
957	3.55873e-05	4.484e-06	2.98933e-06	0.118624
958	4.00714e-05	5.049e-06	3.366e-06	0.133571
959	0.000140217	1.76673e-05	1.17782e-05	0.467389
960	1.85943e-05	2.34288e-06	1.56192e-06	0.0619809
961	0.000118893	1.49806e-05	9.98704e-06	0.396311
962	4.52821e-05	5.70555e-06	3.8037e-06	0.15094
963	5.67864e-05	7.15509e-06	4.77006e-06	0.189288
964	6.74039e-05	8.4929e-06	5.66193e-06	0.22468
965	4.23418e-05	5.33506e-06	3.55671e-06	0.141139
966	6.65549e-05	8.38592e-06	5.59061e-06	0.22185
967	7.47715e-05	9.42121e-06	6.28081e-06	0.249238
968	3.13581e-05	3.95113e-06	2.63408e-06	0.104527
969	6.62861e-05	8.35204e-06	5.56803e-06	0.220954
970	0.000111033	1.39902e-05	9.3268e-06	0.370111
971	5.90083e-05	7.43505e-06	4.9567e-06	0.196694
972	1.66546e-05	2.09848e-06	1.39899e-06	0.0555154
973	3.75148e-05	4.72687e-06	3.15125e-06	0.125049
974	3.53885e-05	4.45896e-06	2.97264e-06	0.117962
975	3.71236e-05	4.67758e-06	3.11839e-06	0.123745
976	4.66991e-05	5.88409e-06	3.92273e-06	0.155664
977	3.08574e-05	3.88803e-06	2.59202e-06	0.102858
978	2.65488e-05	3.34515e-06	2.2301e-06	0.0884959
979	4.25902e-05	5.36637e-06	3.57758e-06	0.141967
980	2.9725e-05	3.74536e-06	2.4969e-06	0.0990835
981	3.74855e-05	4.72317e-06	3.14878e-06	0.124952
982	4.09734e-05	5.16264e-06	3.44176e-06	0.136578
983	0.000149199	1.87991e-05	1.25327e-05	0.497329
984	4.68053e-05	5.89747e-06	3.93164e-06	0.156018
985	9.0968e-05	1.1462e-05	7.64131e-06	0.303227
986	5.20068e-05	6.55285e-06	4.36857e-06	0.173356
987	5.26123e-05	6.62915e-06	4.41943e-06	0.175374
988	7.55007e-05	9.51308e-06	6.34206e-06	0.251669
989	7.22721e-05	9.10628e-06	6.07085e-06	0.240907
990	8.44843e-05	1.0645e-05	7.09668e-06	0.281614
991	5.40412e-05	6.80919e-06	4.53946e-06	0.180137
992	3.90618e-05	4.92179e-06	3.28119e-06	0.130206
993	2.50086e-05	3.15109e-06	2.10073e-06	0.0833621
994	5.38262e-05	6.78211e-06	4.5214e-06	0.179421
995	2.93607e-05	3.69945e-06	2.4663e-06	0.097869
996	8.37222e-05	1.0549e-05	7.03267e-06	0.279074
997	7.13019e-05	8.98404e-06	5.98936e-06	0.237673
998	2.28878e-05	2.88387e-06	1.92258e-06	0.0762928
999	2.94171e-05	3.70655e-06	2.47104e-06	0.098057
1000	4.79507e-05	6.04179e-06	4.02786e-06	0.159836
1001	2.4891e-05	3.13627e-06	2.09084e-06	0.08297
1002	4.27358e-05	5.38471e-06	3.5898e-06	0.142453
1003	7.70767e-05	9.71166e-06	6.47444e-06	0.256922
1004	4.95842e-05	6.24761e-06	4.16507e-06	0.165281
1005	8.0956e-05	1.02005e-05	6.80031e-06	0.269853
1006	9.97951e-05	1.25742e-05	8.38279e-06	0.33265
1007	4.96318e-05	6.2536e-06	4.16907e-06	0.165439
1008	3.16577e-05	3.98887e-06	2.65925e-06	0.105526
1009	4.55259e-05	5.73626e-06	3.82417e-06	0.151753
1010	6.23764e-05	7.85942e-06	5.23962e-06	0.207921
1011	6.4686e-05	8.15044e-06	5.43363e-06	0.21562
1012	6.45613e-05	8.13472e-06	5.42315e-06	0.215204
1013	7.47529e-05	9.41886e-06	6.27924e-06	0.249176
1014	5.72375e-05	7.21193e-06	4.80795e-06	0.190792
1015	7.73113e-05	9.74122e-06	6.49415e-06	0.257704
1016	9.73347e-05	1.22642e-05	8.17612e-06	0.324449
1017	4.4163e-05	5.56454e-06	3.70969e-06	0.14721
1018	4.26041e-05	5.36811e-06	3.57874e-06	0.142014
1019	0.000101553	1.27956e-05	8.53042e-06	0.338509
1020	3.38e-05	4.2588e-06	2.8392e-06	0.112667
1021	4.27384e-05	5.38504e-06	3.59003e-06	0.142461
1022	6.80256e-05	8.57123e-06	5.71415e-06	0.226752
1023	3.65196e-05	4.60146e-06	3.06764e-06	0.121732
1024	4.41062e-05	5.55739e-06	3.70492e-06	0.147021
1025	3.22494e-05	4.06343e-06	2.70895e-06	0.107498
1026	3.97657e-05	5.01048e-06	3.34032e-06	0.132552
1027	3.80577e-05	4.79527e-06	3.19684e-06	0.126859
1028	3.41062e-05	4.29738e-06	2.86492e-06	0.113687
1029	3.61051e-05	4.54924e-06	3.03283e-06	0.12035
1030	1.80591e-05	2.27544e-06	1.51696e-06	0.0601969
1031	5.44431e-05	6.85983e-06	4.57322e-06	0.181477
1032	5.28033e-05	6.65322e-06	4.43548e-06	0.176011
1033	4.35791e-05	5.49096e-06	3.66064e-06	0.145264
1034	6.36008e-05	8.0137e-06	5.34247e-06	0.212003
1035	9.22849e-05	1.16279e-05	7.75193e-06	0.307616
1036	3.07421e-05	3.8735e-06	2.58233e-06	0.102474
1037	5.09012e-05	6.41355e-06	4.2757e-06	0.169671
1038	0.000114755	1.44592e-05	9.63944e-06	0.382517
1039	5.81469e-05	7.3265e-06	4.88434e-06	0.193823
1040	2.24606e-05	2.83004e-06	1.88669e-06	0.0748688
1041	5.77079e-05	7.2712e-06	4.84746e-06	0.19236
1042	3.72295e-05	4.69091e-06	3.12728e-06	0.124098
1043	5.67945e-05	7.15611e-06	4.77074e-06	0.189315
1044	5.60992e-05	7.06849e-06	4.71233e-06	0.186997
1045	5.07544e-05	6.39506e-06	4.26337e-06	0.169181
1046	1.73687e-05	2.18845e-06	1.45897e-06	0.0578956
1047	4.82024e-05	6.0735e-06	4.049e-06	0.160675
1048	7.19106e-05	9.06074e-06	6.04049e-06	0.239702
1049	5.10604e-05	6.43361e-06	4.28908e-06	0.170201
1050	3.75073e-05	4.72592e-06	3.15062e-06	0.125024
1051	4.98326e-05	6.27891e-06	4.18594e-06	0.166109
1052	8.51043e-05	1.07231e-05	7.14876e-06	0.283681
1053	3.70114e-05	4.66343e-06	3.10896e-06	0.123371
1054	7.53629e-05	9.49572e-06	6.33048e-06	0.25121
1055	6.60491e-05	8.32218e-06	5.54812e-06	0.220164
1056	4.28106e-05	5.39414e-06	3.59609e-06	0.142702
1057	2.16816e-05	2.73188e-06	1.82126e-06	0.072272
1058	3.35803e-05	4.23112e-06	2.82075e-06	0.111934
1059	5.74095e-05	7.2336e-06	4.8224e-06	0.191365
1060	6.16922e-05	7.77322e-06	5.18214e-06	0.205641
1061	6.24488e-05	7.86855e-06	5.2457e-06	0.208163
1062	8.62875e-05	1.08722e-05	7.24815e-06	0.287625
1063	3.27952e-05	4.13219e-06	2.7548e-06	0.109317
1064	0.000103948	1.30975e-05	8.73166e-06	0.346495
1065	2.04655e-05	2.57866e-06	1.71911e-06	0.0682185
1066	6.71574e-05	8.46183e-06	5.64122e-06	0.223858
1067	8.77386e-05	1.10551e-05	7.37004e-06	0.292462
1068	3.53139e-05	4.44956e-06	2.96637e-06	0.117713
1069	7.45882e-05	9.39811e-06	6.26541e-06	0.248627
1070	9.24929e-05	1.16541e-05	7.76941e-06	0.30831
1071	6.52882e-05	8.22632e-06	5.48421e-06	0.217627
1072	4.32604e-05	5.45081e-06	3.63388e-06	0.144201
1073	2.87417e-05	3.62145e-06	2.4143e-06	0.0958056
1074	6.78379e-05	8.54757e-06	5.69838e-06	0.226126
1075	3.6208e-05	4.5622e-06	3.04147e-06	0.120693
1076	7.46703e-05	9.40845e-06	6.2723e-06	0.248901
1077	3.12452e-05	3.9369e-06	2.6246e-06	0.104151
1078	5.37088e-05	6.76731e-06	4.51154e-06	0.179029
1079	3.15049e-05	3.96961e-06	2.64641e-06	0.105016
1080	3.19003e-05	4.01944e-06	2.67963e-06	0.106334
1081	8.41908e-05	1.0608e-05	7.07203e-06	0.280636
1082	5.0595e-05	6.37497e-06	4.24998e-06	0.16865
1083	5.57598e-05	7.02574e-06	4.68382e-06	0.185866
1084	4.62705e-05	5.83008e-06	3.88672e-06	0.154235
1085	1.59065e-05	2.00422e-06	1.33615e-06	0.0530217
1086	6.11914e-05	7.71012e-06	5.14008e-06	0.203971
1087	4.76929e-05	6.00931e-06	4.00621e-06	0.158976
1088	4.51508e-05	5.689e-06	3.79266e-06	0.150503
1089	5.70862e-05	7.19286e-06	4.79524e-06	0.190287
1090	2.59964e-05	3.27554e-06	2.1837e-06	0.0866546
1091	6.06814e-05	7.64586e-06	5.09724e-06	0.202271
1092	5.58843e-05	7.04142e-06	4.69428e-06	0.186281
1093	0.000108527	1.36743e-05	9.11623e-06	0.361755
1094	4.28961e-05	5.40491e-06	3.60327e-06	0.142987
1095	2.9332e-05	3.69583e-06	2.46389e-06	0.0977734
1096	5.50606e-05	6.93764e-06	4.62509e-06	0.183535
1097	3.66089e-05	4.61273e-06	3.07515e-06	0.12203
1098	5.64121e-05	7.10793e-06	4.73862e-06	0.18804
1099	6.26997e-05	7.90016e-06	5.26677e-06	0.208999
1100	4.56006e-05	5.74568e-06	3.83045e-06	0.152002
1101	1.66261e-05	2.09489e-06	1.39659e-06	0.0554202
1102	2.07283e-05	2.61176e-06	1.74117e-06	0.0690942
1103	6.41155e-05	8.07855e-06	5.3857e-06	0.213718
1104	7.54166e-05	9.50249e-06	6.33499e-06	0.251389
1105	5.06027e-05	6.37594e-06	4.25063e-06	0.168676
1106	7.65618e-05	9.64678e-06	6.43119e-06	0.255206
1107	6.01385e-05	7.57745e-06	5.05164e-06	0.200462
1108	4.52519e-05	5.70174e-06	3.80116e-06	0.15084
1109	9.02559e-05	1.13722e-05	7.5815e-06	0.300853
1110	2.57237e-05	3.24119e-06	2.16079e-06	0.0857457
1111	3.27519e-05	4.12674e-06	2.75116e-06	0.109173
1112	3.97967e-05	5.01438e-06	3.34292e-06	0.132656
1113	9.25282e-05	1.16586e-05	7.77237e-06	0.308427
1114	9.20759e-05	1.16016e-05	7.73438e-06	0.30692
1115	3.17187e-05	3.99656e-06	2.66437e-06	0.105729
1116	3.32143e-05	4.185e-06	2.79e-06	0.110714
1117	4.75131e-05	5.98666e-06	3.9911e-06	0.158377
1118	3.9589e-05	4.98821e-06	3.32548e-06	0.131963
1119	4.12586e-05	5.19858e-06	3.46572e-06	0.137529
1120	2.38779e-05	3.00862e-06	2.00574e-06	0.079593
1121	4.43511e-05	5.58824e-06	3.72549e-06	0.147837
1122	5.90672e-05	7.44246e-06	4.96164e-06	0.196891
1123	6.09459e-05	7.67918e-06	5.11945e-06	0.203153
1124	5.15171e-05	6.49115e-06	4.32744e-06	0.171724
1125	0.000100418	1.26526e-05	8.4351e-06	0.334726
1126	4.23954e-05	5.34182e-06	3.56121e-06	0.141318
1127	0.000109938	1.38522e-05	9.23477e-06	0.366459
1128	4.33226e-05	5.45865e-06	3.6391e-06	0.144409
1129	4.80378e-05	6.05276e-06	4.03517e-06	0.160126
1130	3.81379e-05	4.80538e-06	3.20359e-06	0.127126
1131	5.0696e-05	6.3877e-06	4.25847e-06	0.168987
1132	5.18911e-05	6.53828e-06	4.35886e-06	0.17297
1133	3.65429e-05	4.6044e-06	3.0696e-06	0.12181
1134	6.25761e-05	7.88458e-06	5.25639e-06	0.208587
1135	1.45718e-05	1.83605e-06	1.22403e-06	0.0485726
1136	4.66222e-05	5.87439e-06	3.91626e-06	0.155407
1137	3.32522e-05	4.18978e-06	2.79319e-06	0.110841
1138	2.78142e-05	3.50459e-06	2.3364e-06	0.0927141
1139	5.26586e-05	6.63499e-06	4.42332e-06	0.175529
1140	4.19357e-05	5.2839e-06	3.5226e-06	0.139786
1141	2.98598e-05	3.76233e-06	2.50822e-06	0.0995325
1142	5.89101e-05	7.42267e-06	4.94845e-06	0.196367
1143	2.40142e-05	3.02578e-06	2.01719e-06	0.0800472
1144	3.82144e-05	4.81501e-06	3.21001e-06	0.127381
1145	5.54652e-05	6.98861e-06	4.65907e-06	0.184884
1146	5.73178e-05	7.22204e-06	4.8147e-06	0.191059
1147	4.36179e-05	5.49585e-06	3.6639e-06	0.145393
1148	4.6673e-05	5.8808e-06	3.92054e-06	0.155577
1149	7.03788e-05	8.86773e-06	5.91182e-06	0.234596
1150	4.95904e-05	6.24839e-06	4.16559e-06	0.165301
1151	6.33817e-05	7.9861e-06	5.32407e-06	0.211272
1152	6.32447e-05	7.96883e-06	5.31256e-06	0.210816
1153	2.37228e-05	2.98908e-06	1.99272e-06	0.0790761
1154	4.87756e-05	6.14572e-06	4.09715e-06	0.162585
1155	5.42025e-05	6.82951e-06	4.55301e-06	0.180675
1156	3.60172e-05	4.53817e-06	3.02545e-06	0.120057
1157	7.71623e-05	9.72245e-06	6.48164e-06	0.257208
1158	4.0192e-05	5.06419e-06	3.37613e-06	0.133973
1159	2.25766e-05	2.84465e-06	1.89643e-06	0.0752553
1160	4.50747e-05	5.67941e-06	3.78627e-06	0.150249
1161	5.55746e-05	7.0024e-06	4.66827e-06	0.185249
1162	3.64829e-05	4.59685e-06	3.06457e-06	0.12161
1163	9.44354e-05	1.18989e-05	7.93257e-06	0.314785
1164	5.01297e-05	6.31634e-06	4.21089e-06	0.167099
1165	4.65575e-05	5.86625e-06	3.91083e-06	0.155192
1166	4.31205e-05	5.43319e-06	3.62212e-06	0.143735
1167	2.64709e-05	3.33533e-06	2.22355e-06	0.0882363
1168	6.23536e-05	7.85655e-06	5.2377e-06	0.207845
1169	5.14447e-05	6.48203e-06	4.32135e-06	0.171482
1170	4.80391e-05	6.05292e-06	4.03528e-06	0.16013
1171	4.49545e-05	5.66427e-06	3.77618e-06	0.149848
1172	8.37052e-05	1.05469e-05	7.03124e-06	0.279017
1173	7.08864e-05	8.93169e-06	5.95446e-06	0.236288
1174	0.000155162	1.95505e-05	1.30336e-05	0.517208
1175	6.5029e-05	8.19365e-06	5.46243e-06	0.216763
1176	4.86611e-05	6.1313e-06	4.08753e-06	0.162204
1177	4.10419e-05	5.17127e-06	3.44752e-06	0.136806
1178	4.17522e-05	5.26077e-06	3.50718e-06	0.139174
1179	3.43523e-05	4.32839e-06	2.88559e-06	0.114508
1180	5.32105e-05	6.70453e-06	4.46969e-06	0.177368
1181	6.71088e-05	8.45571e-06	5.63714e-06	0.223696
1182	2.60126e-05	3.27758e-06	2.18506e-06	0.0867086
1183	4.60281e-05	5.79954e-06	3.86636e-06	0.153427
1184	7.20626e-05	9.07988e-06	6.05325e-06	0.240209
1185	3.70124e-05	4.66356e-06	3.10904e-06	0.123375
1186	3.25511e-05	4.10144e-06	2.73429e-06	0.108504
1187	3.26857e-05	4.11839e-06	2.7456e-06	0.108952
1188	5.24609e-05	6.61007e-06	4.40671e-06	0.17487
1189	4.04135e-05	5.0921e-06	3.39473e-06	0.134712
1190	8.59964e-05	1.08355e-05	7.2237e-06	0.286655
1191	8.00942e-05	1.00919e-05	6.72791e-06	0.266981
1192	5.12005e-05	6.45126e-06	4.30084e-06	0.170668
1193	3.81149e-05	4.80247e-06	3.20165e-06	0.12705
1194	4.42138e-05	5.57094e-06	3.71396e-06	0.147379
1195	4.27627e-05	5.38809e-06	3.59206e-06	0.142542
1196	5.42082e-05	6.83023e-06	4.55349e-06	0.180694
1197	5.11531e-05	6.44529e-06	4.29686e-06	0.17051
1198	3.55363e-05	4.47757e-06	2.98505e-06	0.118454
1199	6.36059e-05	8.01434e-06	5.34289e-06	0.21202
1200	2.84564e-05	3.5855e-06	2.39033e-06	0.0948545
1201	3.98056e-05	5.0155e-06	3.34367e-06	0.132685
1202	4.50003e-05	5.67004e-06	3.78003e-06	0.150001
1203	3.14266e-05	3.95975e-06	2.63983e-06	0.104755
1204	5.87929e-05	7.4079e-06	4.9386e-06	0.195976
1205	8.15268e-05	1.02724e-05	6.84825e-06	0.271756
1206	9.8534e-05	1.24153e-05	8.27686e-06	0.328447
1207	8.01464e-05	1.00985e-05	6.7323e-06	0.267155
1208	7.16789e-05	9.03155e-06	6.02103e-06	0.23893
1209	6.60494e-05	8.32222e-06	5.54815e-06	0.220165
1210	8.25723e-05	1.04041e-05	6.93607e-06	0.275241
1211	3.84688e-05	4.84706e-06	3.23138e-06	0.128229
1212	3.74514e-05	4.71888e-06	3.14592e-06	0.124838
1213	5.01198e-05	6.3151e-06	4.21007e-06	0.167066
1214	4.1308e-05	5.20481e-06	3.46987e-06	0.137693
1215	4.36517e-05	5.50012e-06	3.66675e-06	0.145506
1216	6.27765e-05	7.90983e-06	5.27322e-06	0.209255
1217	5.1197e-05	6.45082e-06	4.30054e-06	0.170657
1218	1.06703e-05	1.34446e-06	8.96307e-07	0.0355677
1219	7.27399e-05	9.16523e-06	6.11015e-06	0.242466
1220	9.77346e-05	1.23146e-05	8.2097e-06	0.325782
1221	7.02458e-05	8.85098e-06	5.90065e-06	0.234153
1222	4.78445e-05	6.0284e-06	4.01893e-06	0.159482
1223	2.10275e-05	2.64947e-06	1.76631e-06	0.0700918
1224	4.64501e-05	5.85272e-06	3.90181e-06	0.154834
1225	5.15549e-05	6.49591e-06	4.33061e-06	0.17185
1226	6.96658e-05	8.7779e-06	5.85193e-06	0.232219
1227	8.04945e-05	1.01423e-05	6.76153e-06	0.268315
1228	3.02591e-05	3.81264e-06	2.54176e-06	0.100864
1229	4.59537e-05	5.79017e-06	3.86011e-06	0.153179
1230	4.45795e-05	5.61702e-06	3.74468e-06	0.148598
1231	5.6333e-05	7.09796e-06	4.73197e-06	0.187777
1232	4.01104e-05	5.05391e-06	3.36927e-06	0.133701
1233	4.18341e-05	5.27109e-06	3.51406e-06	0.139447
1234	2.84085e-05	3.57947e-06	2.38631e-06	0.0946949
1235	7.25894e-05	9.14626e-06	6.09751e-06	0.241965
1236	8.16972e-05	1.02939e-05	6.86257e-06	0.272324
1237	8.85987e-05	1.11634e-05	7.44229e-06	0.295329
1238	6.29949e-05	7.93736e-06	5.29157e-06	0.209983
1239	2.67322e-05	3.36825e-06	2.2455e-06	0.0891072
1240	0.000110429	1.3914e-05	9.27601e-06	0.368096
1241	4.40495e-05	5.55024e-06	3.70016e-06	0.146832
1242	6.69888e-05	8.44059e-06	5.62706e-06	0.223296
1243	2.01279e-05	2.53612e-06	1.69075e-06	0.0670931
1244	3.08279e-05	3.88431e-06	2.58954e-06	0.10276
1245	3.82972e-05	4.82545e-06	3.21697e-06	0.127657
1246	0.000104602	1.31798e-05	8.78656e-06	0.348673
1247	6.18804e-05	7.79693e-06	5.19795e-06	0.206268
1248	4.11434e-05	5.18407e-06	3.45605e-06	0.137145
1249	5.54667e-05	6.9888e-06	4.6592e-06	0.184889
1250	4.9658e-05	6.25691e-06	4.17127e-06	0.165527
1251	3.9592e-05	4.98859e-06	3.32573e-06	0.131973
1252	4.02724e-05	5.07432e-06	3.38288e-06	0.134241
1253	2.17279e-05	2.73771e-06	1.82514e-06	0.0724263
1254	6.67114e-05	8.40564e-06	5.60376e-06	0.222371
1255	1.43772e-05	1.81152e-06	1.20768e-06	0.0479239
1256	7.3243e-05	9.22862e-06	6.15241e-06	0.244143
1257	4.85292e-05	6.11467e-06	4.07645e-06	0.161764
1258	5.81405e-05	7.32571e-06	4.8838e-06	0.193802
1259	2.99023e-05	3.76769e-06	2.51179e-06	0.0996743
1260	2.93212e-05	3.69448e-06	2.46298e-06	0.0977375
1261	2.06514e-05	2.60208e-06	1.73472e-06	0.0688381
1262	3.07762e-05	3.8778e-06	2.5852e-06	0.102587
1263	6.0744e-05	7.65375e-06	5.1025e-06	0.20248
1264	6.03956e-05	7.60985e-06	5.07323e-06	0.201319
1265	3.40268e-05	4.28738e-06	2.85825e-06	0.113423
1266	2.15557e-05	2.71602e-06	1.81068e-06	0.0718525
1267	8.81154e-05	1.11025e-05	7.4017e-06	0.293718
1268	3.31411e-05	4.17577e-06	2.78385e-06	0.11047
1269	5.9522e-05	7.49977e-06	4.99985e-06	0.198407
1270	6.26446e-05	7.89323e-06	5.26215e-06	0.208815
1271	4.46492e-05	5.62579e-06	3.75053e-06	0.148831
1272	4.3609e-05	5.49474e-06	3.66316e-06	0.145363
1273	4.41177e-05	5.55883e-06	3.70589e-06	0.147059
1274	3.62972e-05	4.57345e-06	3.04897e-06	0.120991
1275	4.52545e-05	5.70206e-06	3.80137e-06	0.150848
1276	3.89154e-05	4.90333e-06	3.26889e-06	0.129718
1277	7.02564e-05	8.85231e-06	5.90154e-06	0.234188
1278	2.80497e-05	3.53426e-06	2.35618e-06	0.093499
1279	3.85698e-05	4.85979e-06	3.23986e-06	0.128566
1280	5.26343e-05	6.63192e-06	4.42128e-06	0.175448
1281	6.83574e-05	8.61303e-06	5.74202e-06	0.227858
1282	4.1979e-05	5.28935e-06	3.52623e-06	0.13993
1283	6.3298e-05	7.97554e-06	5.31703e-06	0.210993
1284	7.48068e-05	9.42566e-06	6.28377e-06	0.249356
1285	7.68133e-05	9.67847e-06	6.45232e-06	0.256044
1286	9.77246e-05	1.23133e-05	8.20886e-06	0.325749
1287	8.99467e-05	1.13333e-05	7.55552e-06	0.299822
1288	2.36331e-05	2.97777e-06	1.98518e-06	0.0787771
1289	5.27856e-05	6.65099e-06	4.43399e-06	0.175952
1290	4.21967e-05	5.31678e-06	3.54452e-06	0.140656
1291	3.21086e-05	4.04568e-06	2.69712e-06	0.107029
1292	6.03867e-05	7.60873e-06	5.07248e-06	0.201289
1293	4.19166e-05	5.28149e-06	3.52099e-06	0.139722
1294	8.52334e-05	1.07394e-05	7.15961e-06	0.284111
1295	7.20772e-05	9.08173e-06	6.05449e-06	0.240257
1296	5.50299e-05	6.93376e-06	4.62251e-06	0.183433
1297	3.93342e-05	4.95611e-06	3.30407e-06	0.131114
1298	7.52396e-05	9.4802e-06	6.32013e-06	0.250799
1299	5.24471e-05	6.60833e-06	4.40556e-06	0.174824
1300	3.85498e-05	4.85728e-06	3.23819e-06	0.128499
1301	7.56144e-05	9.52742e-06	6.35161e-06	0.252048
1302	3.76988e-05	4.75005e-06	3.1667e-06	0.125663
1303	3.68469e-05	4.6427e-06	3.09514e-06	0.122823
1304	7.97141e-05	1.0044e-05	6.69598e-06	0.265714
1305	2.73341e-05	3.4441e-06	2.29607e-06	0.0911137
1306	4.86802e-05	6.13371e-06	4.08914e-06	0.162267
1307	1.76973e-05	2.22986e-06	1.48657e-06	0.058991
1308	4.69286e-05	5.91301e-06	3.942e-06	0.156429
1309	2.25917e-05	2.84656e-06	1.8977e-06	0.0753057
1310	4.0982e-05	5.16373e-06	3.44249e-06	0.136607
1311	4.71567e-05	5.94175e-06	3.96117e-06	0.157189
1312	4.57553e-05	5.76516e-06	3.84344e-06	0.152518
1313	4.3428e-05	5.47193e-06	3.64796e-06	0.14476
1314	4.18638e-05	5.27484e-06	3.51656e-06	0.139546
1315	5.21699e-05	6.57341e-06	4.38227e-06	0.1739
1316	7.13002e-05	8.98382e-06	5.98922e-06	0.237667
1317	4.29386e-05	5.41027e-06	3.60684e-06	0.143129
1318	4.73204e-05	5.96238e-06	3.97492e-06	0.157735
1319	4.75736e-05	5.99428e-06	3.99618e-06	0.158579
1320	3.70133e-05	4.66367e-06	3.10911e-06	0.123378
1321	6.39591e-05	8.05885e-06	5.37256e-06	0.213197
1322	3.93607e-05	4.95944e-06	3.3063e-06	0.131202
1323	6.76442e-05	8.52317e-06	5.68211e-06	0.225481
1324	3.66766e-05	4.62126e-06	3.08084e-06	0.122255
1325	1.83952e-05	2.31779e-06	1.54519e-06	0.0613172
1326	4.49966e-05	5.66957e-06	3.77972e-06	0.149989
1327	8.81883e-05	1.11117e-05	7.40782e-06	0.293961
1328	0.000101585	1.27996e-05	8.5331e-06	0.338615
1329	2.11174e-05	2.66079e-06	1.77386e-06	0.0703912
1330	4.42416e-05	5.57445e-06	3.7163e-06	0.147472
1331	6.29597e-05	7.93292e-06	5.28861e-06	0.209866
1332	3.57653e-05	4.50642e-06	3.00428e-06	0.119218
1333	5.4846e-05	6.9106e-06	4.60707e-06	0.18282
1334	5.0693e-05	6.38731e-06	4.25821e-06	0.168977
1335	7.51106e-05	9.46393e-06	6.30929e-06	0.250369
1336	2.44493e-05	3.08062e-06	2.05374e-06	0.0814978
1337	6.01391e-05	7.57753e-06	5.05168e-06	0.200464
1338	5.03134e-05	6.33949e-06	4.22633e-06	0.167711
1339	8.80153e-05	1.10899e-05	7.39329e-06	0.293384
1340	7.15378e-05	9.01376e-06	6.00917e-06	0.238459
1341	4.18002e-05	5.26683e-06	3.51122e-06	0.139334
1342	3.91235e-05	4.92956e-06	3.28637e-06	0.130412
1343	2.18586e-05	2.75418e-06	1.83612e-06	0.072862
1344	4.31349e-05	5.43499e-06	3.62333e-06	0.143783
1345	5.58448e-05	7.03645e-06	4.69096e-06	0.186149
1346	6.56942e-05	8.27747e-06	5.51831e-06	0.218981
1347	4.02495e-05	5.07143e-06	3.38096e-06	0.134165
1348	2.81253e-05	3.54379e-06	2.36253e-06	0.0937511
1349	4.0738e-05	5.13298e-06	3.42199e-06	0.135793
1350	5.73969e-05	7.23201e-06	4.82134e-06	0.191323
1351	4.67811e-05	5.89442e-06	3.92961e-06	0.155937
1352	2.30753e-05	2.90749e-06	1.93832e-06	0.0769176
1353	4.36685e-05	5.50223e-06	3.66816e-06	0.145562
1354	2.9524e-05	3.72003e-06	2.48002e-06	0.0984134
1355	6.61065e-05	8.32942e-06	5.55294e-06	0.220355
1356	3.32969e-05	4.19541e-06	2.79694e-06	0.11099
1357	6.85145e-05	8.63283e-06	5.75522e-06	0.228382
1358	3.78605e-05	4.77042e-06	3.18028e-06	0.126202
1359	4.15577e-05	5.23627e-06	3.49085e-06	0.138526
1360	4.70984e-05	5.9344e-06	3.95627e-06	0.156995
1361	8.55617e-05	1.07808e-05	7.18718e-06	0.285206
1362	8.99015e-05	1.13276e-05	7.55173e-06	0.299672
1363	2.64075e-05	3.32735e-06	2.21823e-06	0.088025
1364	2.46151e-05	3.1015e-06	2.06767e-06	0.0820502
1365	6.89665e-05	8.68978e-06	5.79319e-06	0.229888
1366	6.71426e-05	8.45997e-06	5.63998e-06	0.223809
1367	2.79857e-05	3.5262e-06	2.3508e-06	0.0932857
1368	4.51292e-05	5.68628e-06	3.79085e-06	0.150431
1369	6.97289e-05	8.78584e-06	5.85723e-06	0.23243
1370	2.98078e-05	3.75578e-06	2.50385e-06	0.0993593
1371	3.87865e-05	4.8871e-06	3.25807e-06	0.129288
1372	4.20371e-05	5.29668e-06	3.53112e-06	0.140124
1373	7.76253e-05	9.78079e-06	6.52053e-06	0.258751
1374	3.16196e-05	3.98407e-06	2.65605e-06	0.105399
1375	5.12559e-05	6.45824e-06	4.3055e-06	0.170853
1376	6.09094e-05	7.67459e-06	5.11639e-06	0.203031
1377	5.18192e-05	6.52922e-06	4.35282e-06	0.172731
1378	4.12385e-05	5.19605e-06	3.46403e-06	0.137462
1379	3.66067e-05	4.61244e-06	3.07496e-06	0.122022
1380	7.91361e-05	9.97115e-06	6.64744e-06	0.263787
1381	6.69924e-05	8.44104e-06	5.62736e-06	0.223308
1382	6.15879e-05	7.76007e-06	5.17338e-06	0.205293
1383	0.000112228	1.41407e-05	9.42713e-06	0.374092
1384	6.67845e-05	8.41484e-06	5.6099e-06	0.222615
1385	5.03821e-05	6.34814e-06	4.23209e-06	0.16794
1386	2.54206e-05	3.203e-06	2.13533e-06	0.0847354
1387	3.86411e-05	4.86877e-06	3.24585e-06	0.128804
1388	7.69814e-05	9.69966e-06	6.46644e-06	0.256605
1389	4.34657e-05	5.47667e-06	3.65112e-06	0.144886
1390	8.763e-05	1.10414e-05	7.36092e-06	0.2921
1391	3.65437e-05	4.6045e-06	3.06967e-06	0.121812
1392	4.23222e-05	5.33259e-06	3.55506e-06	0.141074
1393	4.04021e-05	5.09067e-06	3.39378e-06	0.134674
1394	6.78706e-05	8.55169e-06	5.70113e-06	0.226235
1395	9.832e-05	1.23883e-05	8.25888e-06	0.327733
1396	3.39234e-05	4.27434e-06	2.84956e-06	0.113078
1397	3.75396e-05	4.72999e-06	3.15333e-06	0.125132
1398	3.64942e-05	4.59827e-06	3.06551e-06	0.121647
1399	3.56734e-05	4.49484e-06	2.99656e-06	0.118911
1400	5.78901e-05	7.29416e-06	4.86277e-06	0.192967
1401	6.85139e-05	8.63276e-06	5.75517e-06	0.22838
1402	6.78371e-05	8.54747e-06	5.69832e-06	0.226124
1403	5.0927e-05	6.4168e-06	4.27787e-06	0.169757
1404	7.3326e-05	9.23908e-06	6.15938e-06	0.24442
1405	6.38622e-05	8.04664e-06	5.36443e-06	0.212874
1406	5.19858e-05	6.55021e-06	4.3668e-06	0.173286
1407	3.30766e-05	4.16765e-06	2.77843e-06	0.110255
1408	3.60517e-05	4.54252e-06	3.02835e-06	0.120172
1409	5.06917e-05	6.38716e-06	4.25811e-06	0.168972
1410	4.31886e-05	5.44177e-06	3.62784e-06	0.143962
1411	4.36794e-05	5.5036e-06	3.66907e-06	0.145598
1412	5.39508e-05	6.7978e-06	4.53187e-06	0.179836
1413	6.9165e-05	8.7148e-06	5.80986e-06	0.23055
1414	3.33773e-05	4.20554e-06	2.8037e-06	0.111258
1415	3.17638e-05	4.00224e-06	2.66816e-06	0.105879
1416	3.50536e-05	4.41676e-06	2.9445e-06	0.116845
1417	8.15715e-05	1.0278e-05	6.85201e-06	0.271905
1418	3.17495e-05	4.00044e-06	2.66696e-06	0.105832
1419	5.09246e-05	6.4165e-06	4.27767e-06	0.169749
1420	3.83728e-05	4.83498e-06	3.22332e-06	0.127909
1421	5.78629e-05	7.29073e-06	4.86049e-06	0.192876
1422	3.71586e-05	4.68199e-06	3.12132e-06	0.123862
1423	8.25929e-05	1.04067e-05	6.9378e-06	0.27531
1424	4.75486e-05	5.99112e-06	3.99408e-06	0.158495
1425	5.2784e-05	6.65078e-06	4.43386e-06	0.175947
1426	2.99451e-05	3.77308e-06	2.51539e-06	0.0998169
1427	4.81892e-05	6.07184e-06	4.04789e-06	0.160631
1428	2.71358e-05	3.4191e-06	2.2794e-06	0.0904525
1429	6.06262e-05	7.6389e-06	5.0926e-06	0.202087
1430	4.411e-05	5.55787e-06	3.70524e-06	0.147033
1431	4.23097e-05	5.33102e-06	3.55401e-06	0.141032
1432	1.86005e-05	2.34367e-06	1.56244e-06	0.0620017
1433	8.13436e-05	1.02493e-05	6.83286e-06	0.271145
1434	2.75422e-05	3.47032e-06	2.31355e-06	0.0918074
1435	4.53786e-05	5.7177e-06	3.8118e-06	0.151262
1436	7.70558e-05	9.70904e-06	6.47269e-06	0.256853
1437	3.61758e-05	4.55815e-06	3.03877e-06	0.120586
1438	8.13849e-05	1.02545e-05	6.83633e-06	0.271283
1439	3.45224e-05	4.34982e-06	2.89988e-06	0.115075
1440	5.27449e-05	6.64586e-06	4.43057e-06	0.175816
1441	7.38701e-05	9.30763e-06	6.20509e-06	0.246234
1442	4.11539e-05	5.18539e-06	3.45693e-06	0.13718
1443	4.28742e-05	5.40215e-06	3.60143e-06	0.142914
1444	6.12605e-05	7.71882e-06	5.14588e-06	0.204202
1445	4.19305e-05	5.28325e-06	3.52217e-06	0.139768
1446	0.000102234	1.28815e-05	8.58769e-06	0.340781
1447	6.62787e-05	8.35112e-06	5.56741e-06	0.220929
1448	4.8649e-05	6.12978e-06	4.08652e-06	0.162163
1449	4.36143e-05	5.4954e-06	3.6636e-06	0.145381
1450	7.88295e-05	9.93252e-06	6.62168e-06	0.262765
1451	3.66723e-05	4.6207e-06	3.08047e-06	0.122241
1452	2.2214e-05	2.79896e-06	1.86598e-06	0.0740467
1453	4.10651e-05	5.1742e-06	3.44947e-06	0.136884
1454	3.86452e-05	4.8693e-06	3.2462e-06	0.128817
1455	4.49885e-05	5.66856e-06	3.77904e-06	0.149962
1456	3.14786e-05	3.96631e-06	2.64421e-06	0.104929
1457	3.37965e-05	4.25836e-06	2.8389e-06	0.112655
1458	3.49823e-05	4.40776e-06	2.93851e-06	0.116608
1459	5.35978e-05	6.75332e-06	4.50222e-06	0.178659
1460	2.32559e-05	2.93024e-06	1.95349e-06	0.0775195
1461	3.48058e-05	4.38553e-06	2.92369e-06	0.116019
1462	5.9328e-05	7.47533e-06	4.98355e-06	0.19776
1463	4.05282e-05	5.10655e-06	3.40437e-06	0.135094
1464	3.83747e-05	4.83521e-06	3.22348e-06	0.127916
1465	3.55198e-05	4.4755e-06	2.98366e-06	0.118399
1466	5.09523e-05	6.41999e-06	4.28e-06	0.169841
1467	6.19102e-05	7.80068e-06	5.20046e-06	0.206367
1468	6.20899e-05	7.82333e-06	5.21555e-06	0.206966
1469	5.59014e-05	7.04358e-06	4.69572e-06	0.186338
1470	6.43582e-05	8.10913e-06	5.40609e-06	0.214527
1471	6.19105e-05	7.80072e-06	5.20048e-06	0.206368
1472	2.73323e-05	3.44387e-06	2.29592e-06	0.0911078
1473	5.39691e-05	6.80011e-06	4.5334e-06	0.179897
1474	3.82504e-05	4.81954e-06	3.21303e-06	0.127501
1475	2.54507e-05	3.20679e-06	2.13786e-06	0.0848357
1476	4.25466e-05	5.36087e-06	3.57391e-06	0.141822
1477	3.41776e-05	4.30638e-06	2.87092e-06	0.113925
1478	7.96975e-05	1.00419e-05	6.69459e-06	0.265658
1479	8.19687e-05	1.03281e-05	6.88537e-06	0.273229
1480	5.80839e-05	7.31857e-06	4.87905e-06	0.193613
1481	4.18537e-05	5.27357e-06	3.51571e-06	0.139512
1482	4.15708e-05	5.23792e-06	3.49194e-06	0.138569
1483	2.37629e-05	2.99412e-06	1.99608e-06	0.0792096
1484	9.39024e-05	1.18317e-05	7.8878e-06	0.313008
1485	6.6233e-05	8.34535e-06	5.56357e-06	0.220777
1486	3.90364e-05	4.91859e-06	3.27906e-06	0.130121
1487	5.37411e-05	6.77138e-06	4.51425e-06	0.179137
1488	2.716e-05	3.42215e-06	2.28144e-06	0.0905332
1489	4.35114e-05	5.48244e-06	3.65496e-06	0.145038
1490	5.13806e-05	6.47396e-06	4.31597e-06	0.171269
1491	3.17207e-05	3.99681e-06	2.66454e-06	0.105736
1492	4.76458e-05	6.00338e-06	4.00225e-06	0.158819
1493	8.0213e-05	1.01068e-05	6.73789e-06	0.267377
1494	2.75275e-05	3.46846e-06	2.31231e-06	0.0917582
1495	4.16036e-05	5.24206e-06	3.49471e-06	0.138679
1496	6.87568e-05	8.66336e-06	5.77558e-06	0.229189
1497	3.33726e-05	4.20494e-06	2.8033e-06	0.111242
1498	3.80498e-05	4.79428e-06	3.19619e-06	0.126833
1499	3.16322e-05	3.98566e-06	2.65711e-06	0.105441
1500	6.3494e-05	8.00025e-06	5.3335e-06	0.211647
1501	5.81158e-05	7.32258e-06	4.88172e-06	0.193719
1502	7.37419e-05	9.29148e-06	6.19432e-06	0.245806
1503	1.70485e-05	2.14811e-06	1.43207e-06	0.0568282
1504	4.38746e-05	5.5282e-06	3.68547e-06	0.146249
1505	3.96976e-05	5.0019e-06	3.3346e-06	0.132325
1506	7.45842e-05	9.39761e-06	6.26507e-06	0.248614
1507	5.8703e-05	7.39657e-06	4.93105e-06	0.195677
1508	7.9032e-05	9.95803e-06	6.63869e-06	0.26344
1509	4.19999e-05	5.29199e-06	3.52799e-06	0.14
1510	1.4328e-05	1.80532e-06	1.20355e-06	0.0477599
1511	4.59594e-05	5.79089e-06	3.86059e-06	0.153198
1512	0.00023542	2.96629e-05	1.97752e-05	0.784732
1513	2.88719e-05	3.63786e-06	2.42524e-06	0.0962396
1514	8.12214e-05	1.02339e-05	6.8226e-06	0.270738
1515	3.08161e-05	3.88283e-06	2.58856e-06	0.10272
1516	2.36265e-05	2.97694e-06	1.98462e-06	0.078755
1517	5.12461e-05	6.457e-06	4.30467e-06	0.17082
1518	2.29415e-05	2.89063e-06	1.92709e-06	0.0764717
1519	5.18833e-05	6.5373e-06	4.3582e-06	0.172944
1520	8.84041e-05	1.11389e-05	7.42595e-06	0.29468
1521	5.74639e-05	7.24045e-06	4.82697e-06	0.191546
1522	1.895e-05	2.3877e-06	1.5918e-06	0.0631667
1523	6.09045e-05	7.67397e-06	5.11598e-06	0.203015
1524	3.19164e-05	4.02146e-06	2.68097e-06	0.106388
1525	8.40661e-05	1.05923e-05	7.06155e-06	0.28022
1526	4.89469e-05	6.16731e-06	4.11154e-06	0.163156
1527	3.06829e-05	3.86605e-06	2.57737e-06	0.102276
1528	4.1599e-05	5.24147e-06	3.49431e-06	0.138663
1529	4.18082e-05	5.26784e-06	3.51189e-06	0.139361
1530	6.178e-05	7.78428e-06	5.18952e-06	0.205933
1531	6.30596e-05	7.94551e-06	5.29701e-06	0.210199
1532	4.22247e-05	5.32032e-06	3.54688e-06	0.140749
1533	5.81696e-05	7.32937e-06	4.88625e-06	0.193899
1534	5.61e-05	7.0686e-06	4.7124e-06	0.187
1535	4.45543e-05	5.61384e-06	3.74256e-06	0.148514
1536	7.74784e-05	9.76228e-06	6.50818e-06	0.258261
1537	3.52685e-05	4.44383e-06	2.96256e-06	0.117562
1538	3.39943e-05	4.28328e-06	2.85552e-06	0.113314
1539	5.75623e-05	7.25285e-06	4.83523e-06	0.191874
1540	5.12066e-05	6.45203e-06	4.30136e-06	0.170689
1541	6.63645e-05	8.36193e-06	5.57462e-06	0.221215
1542	8.43234e-05	1.06247e-05	7.08317e-06	0.281078
1543	1.49408e-05	1.88254e-06	1.25503e-06	0.0498027
1544	4.78539e-05	6.02959e-06	4.01973e-06	0.159513
1545	6.96419e-05	8.77488e-06	5.84992e-06	0.23214
1546	0.000113317	1.42779e-05	9.51862e-06	0.377723
1547	4.07485e-05	5.13432e-06	3.42288e-06	0.135828
1548	6.24675e-05	7.8709e-06	5.24727e-06	0.208225
1549	6.70258e-05	8.44525e-06	5.63016e-06	0.223419
1550	4.2734e-05	5.38448e-06	3.58966e-06	0.142447
1551	3.24916e-05	4.09394e-06	2.72929e-06	0.108305
1552	3.4586e-05	4.35784e-06	2.90523e-06	0.115287
1553	2.8811e-05	3.63018e-06	2.42012e-06	0.0960366
1554	3.92498e-05	4.94547e-06	3.29698e-06	0.130833
1555	3.10466e-05	3.91187e-06	2.60791e-06	0.103489
1556	7.69037e-05	9.68986e-06	6.45991e-06	0.256346
1557	5.44263e-05	6.85771e-06	4.57181e-06	0.181421
1558	4.83453e-05	6.0915e-06	4.061e-06	0.161151
1559	3.43164e-05	4.32386e-06	2.88257e-06	0.114388
1560	2.70497e-05	3.40827e-06	2.27218e-06	0.0901658
1561	3.3115e-05	4.17249e-06	2.78166e-06	0.110383
1562	5.05351e-05	6.36742e-06	4.24495e-06	0.16845
1563	3.24206e-05	4.085e-06	2.72333e-06	0.108069
1564	4.49017e-05	5.65761e-06	3.77174e-06	0.149672
1565	3.28639e-05	4.14085e-06	2.76057e-06	0.109546
1566	8.40482e-05	1.05901e-05	7.06005e-06	0.280161
1567	6.05904e-05	7.6344e-06	5.0896e-06	0.201968
1568	7.33024e-05	9.2361e-06	6.1574e-06	0.244341
1569	0.000110942	1.39787e-05	9.31913e-06	0.369807
1570	0.000116516	1.4681e-05	9.78734e-06	0.388386
1571	4.57505e-05	5.76457e-06	3.84304e-06	0.152502
1572	6.06148e-05	7.63747e-06	5.09164e-06	0.202049
1573	2.66275e-05	3.35506e-06	2.23671e-06	0.0887583
1574	7.28716e-05	9.18183e-06	6.12122e-06	0.242905
1575	6.3615e-05	8.0155e-06	5.34366e-06	0.21205
1576	5.6613e-05	7.13323e-06	4.75549e-06	0.18871
1577	5.73403e-05	7.22488e-06	4.81659e-06	0.191134
1578	4.40796e-05	5.55404e-06	3.70269e-06	0.146932
1579	6.03017e-05	7.59802e-06	5.06535e-06	0.201006
1580	0.000102624	1.29306e-05	8.62042e-06	0.34208
1581	6.56658e-05	8.27389e-06	5.51593e-06	0.218886
1582	5.72719e-05	7.21626e-06	4.81084e-06	0.190906
1583	6.13159e-05	7.7258e-06	5.15053e-06	0.204386
1584	3.70384e-05	4.66684e-06	3.11123e-06	0.123461
1585	3.11813e-05	3.92885e-06	2.61923e-06	0.103938
1586	4.568e-05	5.75568e-06	3.83712e-06	0.152267
1587	0.000223565	2.81692e-05	1.87795e-05	0.745218
1588	4.12762e-05	5.2008e-06	3.4672e-06	0.137587
1589	7.64919e-05	9.63798e-06	6.42532e-06	0.254973
1590	6.23072e-05	7.8507e-06	5.2338e-06	0.207691
1591	3.30378e-05	4.16276e-06	2.77517e-06	0.110126
1592	5.52105e-05	6.95653e-06	4.63768e-06	0.184035
1593	7.08819e-05	8.93112e-06	5.95408e-06	0.236273
1594	6.60647e-05	8.32415e-06	5.54943e-06	0.220216
1595	3.11196e-05	3.92107e-06	2.61405e-06	0.103732
1596	5.8564e-05	7.37906e-06	4.91937e-06	0.195213
1597	3.22548e-05	4.0641e-06	2.7094e-06	0.107516
1598	3.54425e-05	4.46576e-06	2.97717e-06	0.118142
1599	4.49499e-05	5.66369e-06	3.77579e-06	0.149833
1600	7.22123e-05	9.09875e-06	6.06583e-06	0.240708
1601	4.02724e-05	5.07432e-06	3.38288e-06	0.134241
1602	4.59324e-05	5.78748e-06	3.85832e-06	0.153108
1603	3.67932e-05	4.63595e-06	3.09063e-06	0.122644
1604	2.22648e-05	2.80536e-06	1.87024e-06	0.0742158
1605	4.48261e-05	5.64809e-06	3.76539e-06	0.14942
1606	3.34441e-05	4.21395e-06	2.8093e-06	0.11148
1607	4.10835e-05	5.17652e-06	3.45101e-06	0.136945
1608	6.91925e-05	8.71826e-06	5.81217e-06	0.230642
1609	4.22401e-05	5.32225e-06	3.54817e-06	0.1408
1610	3.91004e-05	4.92665e-06	3.28443e-06	0.130335
1611	5.95858e-05	7.50781e-06	5.00521e-06	0.198619
1612	4.81232e-05	6.06352e-06	4.04235e-06	0.160411
1613	3.72787e-05	4.69711e-06	3.13141e-06	0.124262
1614	3.77252e-05	4.75338e-06	3.16892e-06	0.125751
1615	6.47401e-05	8.15725e-06	5.43817e-06	0.2158
1616	3.65317e-05	4.60299e-06	3.06866e-06	0.121772
1617	4.35404e-05	5.48609e-06	3.65739e-06	0.145135
1618	3.93575e-05	4.95905e-06	3.30603e-06	0.131192
1619	5.95714e-05	7.50599e-06	5.00399e-06	0.198571
1620	3.32743e-05	4.19256e-06	2.79504e-06	0.110914
1621	9.19198e-05	1.15819e-05	7.72126e-06	0.306399
1622	5.11309e-05	6.4425e-06	4.295e-06	0.170436
1623	3.09283e-05	3.89697e-06	2.59798e-06	0.103094
1624	5.39716e-05	6.80043e-06	4.53362e-06	0.179905
1625	4.38645e-05	5.52692e-06	3.68461e-06	0.146215
1626	3.04603e-05	3.83799e-06	2.55866e-06	0.101534
1627	6.57462e-05	8.28403e-06	5.52268e-06	0.219154
1628	5.34381e-05	6.7332e-06	4.4888e-06	0.178127
1629	5.28412e-05	6.65799e-06	4.43866e-06	0.176137
1630	6.7864e-05	8.55087e-06	5.70058e-06	0.226213
1631	8.90135e-05	1.12157e-05	7.47714e-06	0.296712
1632	3.70459e-05	4.66779e-06	3.11186e-06	0.123486
1633	4.77385e-05	6.01506e-06	4.01004e-06	0.159128
1634	4.58369e-05	5.77545e-06	3.8503e-06	0.15279
1635	4.26966e-05	5.37977e-06	3.58652e-06	0.142322
1636	5.33957e-05	6.72785e-06	4.48524e-06	0.177986
1637	3.21894e-05	4.05586e-06	2.70391e-06	0.107298
1638	7.83425e-05	9.87116e-06	6.58077e-06	0.261142
1639	4.93254e-05	6.21501e-06	4.14334e-06	0.164418
1640	8.61739e-05	1.08579e-05	7.2386e-06	0.287246
1641	1.46516e-05	1.8461e-06	1.23074e-06	0.0488387
1642	0.000115214	1.45169e-05	9.67796e-06	0.384046
1643	2.71569e-05	3.42177e-06	2.28118e-06	0.0905229
1644	1.94604e-05	2.45202e-06	1.63468e-06	0.0648682
1645	4.69643e-05	5.91751e-06	3.94501e-06	0.156548
1646	0.00011255	1.41813e-05	9.45419e-06	0.375166
1647	6.56998e-05	8.27818e-06	5.51878e-06	0.218999
1648	7.72176e-05	9.72942e-06	6.48628e-06	0.257392
1649	3.43308e-05	4.32568e-06	2.88379e-06	0.114436
1650	6.96596e-05	8.77711e-06	5.8514e-06	0.232199
1651	3.92018e-05	4.93943e-06	3.29296e-06	0.130673
1652	3.40107e-05	4.28535e-06	2.8569e-06	0.113369
1653	1.99417e-05	2.51265e-06	1.6751e-06	0.0664722
1654	6.1897e-05	7.79902e-06	5.19935e-06	0.206323
1655	9.4028e-05	1.18475e-05	7.89835e-06	0.313427
1656	4.92893e-05	6.21045e-06	4.1403e-06	0.164298
1657	6.0918e-05	7.67567e-06	5.11711e-06	0.20306
1658	3.2404e-05	4.0829e-06	2.72193e-06	0.108013
1659	2.2169e-05	2.7933e-06	1.8622e-06	0.0738967
1660	3.34296e-05	4.21213e-06	2.80809e-06	0.111432
1661	5.05455e-05	6.36874e-06	4.24583e-06	0.168485
1662	3.62127e-05	4.56279e-06	3.04186e-06	0.120709
1663	2.86128e-05	3.60522e-06	2.40348e-06	0.0953762
1664	0.000108535	1.36754e-05	9.11696e-06	0.361784
1665	4.49844e-05	5.66804e-06	3.77869e-06	0.149948
1666	1.67959e-05	2.11628e-06	1.41085e-06	0.0559863
1667	0.000127227	1.60306e-05	1.06871e-05	0.424091
1668	9.10704e-05	1.14749e-05	7.64992e-06	0.303568
1669	2.24623e-05	2.83025e-06	1.88683e-06	0.0748743
1670	3.54745e-05	4.46978e-06	2.97986e-06	0.118248
1671	5.01813e-05	6.32284e-06	4.21523e-06	0.167271
1672	4.37796e-05	5.51624e-06	3.67749e-06	0.145932
1673	4.05809e-05	5.11319e-06	3.40879e-06	0.13527
1674	2.44778e-05	3.0842e-06	2.05613e-06	0.0815926
1675	4.27095e-05	5.3814e-06	3.5876e-06	0.142365
1676	4.80983e-05	6.06038e-06	4.04025e-06	0.160328
1677	4.51748e-05	5.69203e-06	3.79468e-06	0.150583
1678	0.00010117	1.27474e-05	8.49828e-06	0.337233
1679	5.94194e-05	7.48684e-06	4.99123e-06	0.198065
1680	5.55069e-05	6.99386e-06	4.66258e-06	0.185023
1681	5.72748e-05	7.21662e-06	4.81108e-06	0.190916
1682	5.14429e-05	6.48181e-06	4.32121e-06	0.171476
1683	3.59181e-05	4.52568e-06	3.01712e-06	0.119727
1684	3.45272e-05	4.35042e-06	2.90028e-06	0.115091
1685	4.86498e-05	6.12988e-06	4.08659e-06	0.162166
1686	0.000102591	1.29265e-05	8.61768e-06	0.341972
1687	3.89466e-05	4.90728e-06	3.27152e-06	0.129822
1688	2.55215e-05	3.21571e-06	2.14381e-06	0.0850717
1689	3.87506e-05	4.88258e-06	3.25505e-06	0.129169
1690	9.28784e-05	1.17027e-05	7.80179e-06	0.309595
1691	3.33886e-05	4.20697e-06	2.80464e-06	0.111295
1692	4.07136e-05	5.12992e-06	3.41994e-06	0.135712
1693	4.55925e-05	5.74465e-06	3.82977e-06	0.151975
1694	5.12451e-05	6.45689e-06	4.30459e-06	0.170817
1695	6.22162e-05	7.83924e-06	5.22616e-06	0.207387
1696	0.00012317	1.55194e-05	1.03463e-05	0.410565
1697	5.53181e-05	6.97008e-06	4.64672e-06	0.184394
1698	3.55674e-05	4.48149e-06	2.98766e-06	0.118558
1699	8.30409e-05	1.04631e-05	6.97543e-06	0.276803
1700	3.53414e-05	4.45301e-06	2.96867e-06	0.117805
1701	8.15371e-05	1.02737e-05	6.84912e-06	0.27179
1702	4.4715e-05	5.63409e-06	3.75606e-06	0.14905
1703	4.93576e-05	6.21906e-06	4.14604e-06	0.164525
1704	6.86921e-05	8.6552e-06	5.77014e-06	0.228974
1705	5.55886e-05	7.00416e-06	4.66944e-06	0.185295
1706	5.8407e-05	7.35928e-06	4.90619e-06	0.19469
1707	3.15288e-05	3.97263e-06	2.64842e-06	0.105096
1708	6.73057e-05	8.48052e-06	5.65368e-06	0.224352
1709	3.27965e-05	4.13236e-06	2.75491e-06	0.109322
1710	3.57471e-05	4.50414e-06	3.00276e-06	0.119157
1711	4.86718e-05	6.13265e-06	4.08843e-06	0.162239
1712	5.85019e-05	7.37124e-06	4.91416e-06	0.195006
1713	4.89416e-05	6.16664e-06	4.11109e-06	0.163139
1714	5.20354e-05	6.55646e-06	4.37097e-06	0.173451
1715	5.86495e-05	7.38984e-06	4.92656e-06	0.195498
1716	6.96299e-05	8.77336e-06	5.84891e-06	0.2321
1717	4.70619e-05	5.9298e-06	3.9532e-06	0.156873
1718	0.000106117	1.33708e-05	8.91387e-06	0.353725
1719	4.68157e-05	5.89878e-06	3.93252e-06	0.156052
1720	3.69893e-05	4.66066e-06	3.1071e-06	0.123298
1721	6.40654e-05	8.07224e-06	5.38149e-06	0.213551
1722	3.31786e-05	4.18051e-06	2.787e-06	0.110595
1723	5.13315e-05	6.46776e-06	4.31184e-06	0.171105
1724	4.19591e-05	5.28685e-06	3.52456e-06	0.139864
1725	3.98596e-05	5.02231e-06	3.34821e-06	0.132865
1726	4.65302e-05	5.8628e-06	3.90853e-06	0.155101
1727	8.70875e-05	1.0973e-05	7.31535e-06	0.290292
1728	6.58372e-05	8.29549e-06	5.53033e-06	0.219457
1729	3.69955e-05	4.66143e-06	3.10762e-06	0.123318
1730	6.0258e-05	7.59251e-06	5.06167e-06	0.20086
1731	2.72318e-05	3.4312e-06	2.28747e-06	0.0907725
1732	4.99137e-05	6.28912e-06	4.19275e-06	0.166379
1733	6.94656e-05	8.75267e-06	5.83511e-06	0.231552
1734	3.01491e-05	3.79879e-06	2.53253e-06	0.100497
1735	8.03541e-05	1.01246e-05	6.74975e-06	0.267847
1736	4.19801e-05	5.2895e-06	3.52633e-06	0.139934
1737	6.07292e-05	7.65188e-06	5.10126e-06	0.202431
1738	2.5376e-05	3.19738e-06	2.13159e-06	0.0845868
1739	3.6983e-05	4.65985e-06	3.10657e-06	0.123277
1740	6.9252e-05	8.72575e-06	5.81717e-06	0.23084
1741	4.21072e-05	5.30551e-06	3.53701e-06	0.140357
1742	4.42499e-05	5.57548e-06	3.71699e-06	0.1475
1743	5.57303e-05	7.02202e-06	4.68135e-06	0.185768
1744	7.89342e-05	9.94571e-06	6.63048e-06	0.263114
1745	6.8022e-05	8.57077e-06	5.71385e-06	0.22674
1746	2.4221e-05	3.05185e-06	2.03456e-06	0.0807367
1747	5.06717e-05	6.38463e-06	4.25642e-06	0.168906
1748	3.1558e-05	3.97631e-06	2.65087e-06	0.105193
1749	4.59665e-05	5.79178e-06	3.86119e-06	0.153222
1750	7.36545e-05	9.28046e-06	6.18698e-06	0.245515
1751	4.11534e-05	5.18533e-06	3.45688e-06	0.137178
1752	6.69961e-05	8.44151e-06	5.62768e-06	0.22332
1753	2.39318e-05	3.01541e-06	2.01027e-06	0.0797728
1754	9.0293e-05	1.13769e-05	7.58461e-06	0.300977
1755	9.3374e-05	1.17651e-05	7.84341e-06	0.311247
1756	4.62344e-05	5.82554e-06	3.88369e-06	0.154115
1757	2.15741e-05	2.71834e-06	1.81222e-06	0.0719137
1758	8.95884e-05	1.12881e-05	7.52542e-06	0.298628
1759	6.42336e-05	8.09344e-06	5.39563e-06	0.214112
1760	3.6258e-05	4.5685e-06	3.04567e-06	0.12086
1761	3.76253e-05	4.74079e-06	3.16052e-06	0.125418
1762	3.81073e-05	4.80152e-06	3.20101e-06	0.127024
1763	4.51429e-05	5.688e-06	3.792e-06	0.150476
1764	8.48121e-05	1.06863e-05	7.12422e-06	0.282707
1765	1.87051e-05	2.35685e-06	1.57123e-06	0.0623504
1766	4.45882e-05	5.61811e-06	3.7454e-06	0.148627
1767	5.35924e-05	6.75264e-06	4.50176e-06	0.178641
1768	2.3101e-05	2.91073e-06	1.94049e-06	0.0770034
1769	4.34847e-05	5.47907e-06	3.65271e-06	0.144949
1770	3.66064e-05	4.61241e-06	3.07494e-06	0.122021
1771	4.98979e-05	6.28713e-06	4.19142e-06	0.166326
1772	7.74711e-05	9.76136e-06	6.50758e-06	0.258237
1773	4.44046e-05	5.59499e-06	3.72999e-06	0.148015
1774	3.46942e-05	4.37147e-06	2.91431e-06	0.115647
1775	2.48684e-05	3.13342e-06	2.08894e-06	0.0828946
1776	5.61438e-05	7.07412e-06	4.71608e-06	0.187146
1777	3.67159e-05	4.62621e-06	3.08414e-06	0.122386
1778	2.84724e-05	3.58753e-06	2.39169e-06	0.0949082
1779	6.99452e-05	8.8131e-06	5.8754e-06	0.233151
1780	7.75115e-05	9.76645e-06	6.51096e-06	0.258372
1781	3.14494e-05	3.96263e-06	2.64175e-06	0.104831
1782	8.11258e-05	1.02218e-05	6.81457e-06	0.270419
1783	5.97122e-05	7.52374e-06	5.01583e-06	0.199041
1784	4.70277e-05	5.92549e-06	3.95033e-06	0.156759
1785	8.63604e-05	1.08814e-05	7.25427e-06	0.287868
1786	3.18195e-05	4.00926e-06	2.67284e-06	0.106065
1787	4.60848e-05	5.80669e-06	3.87113e-06	0.153616
1788	5.49998e-05	6.92998e-06	4.61999e-06	0.183333
1789	5.19326e-05	6.54351e-06	4.36234e-06	0.173109
1790	2.90663e-05	3.66235e-06	2.44157e-06	0.0968877
1791	9.15705e-05	1.15379e-05	7.69192e-06	0.305235
1792	3.73048e-05	4.70041e-06	3.13361e-06	0.124349
1793	2.17374e-05	2.73891e-06	1.82594e-06	0.0724579
1794	5.8569e-05	7.37969e-06	4.9198e-06	0.19523
1795	4.91399e-05	6.19163e-06	4.12775e-06	0.1638
1796	3.10455e-05	3.91174e-06	2.60782e-06	0.103485
1797	7.78891e-05	9.81403e-06	6.54269e-06	0.25963
1798	7.93137e-05	9.99352e-06	6.66235e-06	0.264379
1799	9.5502e-05	1.20333e-05	8.02217e-06	0.31834
1800	6.36255e-05	8.01682e-06	5.34454e-06	0.212085
1801	4.71621e-05	5.94242e-06	3.96161e-06	0.157207
1802	5.31952e-05	6.7026e-06	4.4684e-06	0.177317
1803	6.19279e-05	7.80291e-06	5.20194e-06	0.206426
1804	6.47958e-05	8.16427e-06	5.44285e-06	0.215986
1805	3.86375e-05	4.86833e-06	3.24555e-06	0.128792
1806	1.39089e-05	1.75253e-06	1.16835e-06	0.0463631
1807	0.000132493	1.66941e-05	1.11294e-05	0.441644
1808	3.67673e-05	4.63268e-06	3.08846e-06	0.122558
1809	7.50528e-05	9.45665e-06	6.30444e-06	0.250176
1810	6.19359e-05	7.80392e-06	5.20261e-06	0.206453
1811	5.21528e-05	6.57125e-06	4.38083e-06	0.173843
1812	4.266e-05	5.37516e-06	3.58344e-06	0.1422
1813	3.43625e-05	4.32968e-06	2.88645e-06	0.114542
1814	4.33592e-05	5.46326e-06	3.64218e-06	0.144531
1815	7.22422e-05	9.10252e-06	6.06834e-06	0.240807
1816	2.42964e-05	3.06135e-06	2.0409e-06	0.080988
1817	6.57343e-05	8.28252e-06	5.52168e-06	0.219114
1818	6.72966e-05	8.47938e-06	5.65292e-06	0.224322
1819	3.70175e-05	4.66421e-06	3.10947e-06	0.123392
1820	4.99548e-05	6.29431e-06	4.1962e-06	0.166516
1821	6.8558e-05	8.6383e-06	5.75887e-06	0.228527
1822	5.78601e-05	7.29038e-06	4.86025e-06	0.192867
1823	4.56424e-05	5.75094e-06	3.83396e-06	0.152141
1824	5.56289e-05	7.00925e-06	4.67283e-06	0.18543
1825	6.20837e-05	7.82255e-06	5.21503e-06	0.206946
1826	6.99594e-05	8.81488e-06	5.87659e-06	0.233198
1827	5.59728e-05	7.05257e-06	4.70171e-06	0.186576
1828	4.06584e-05	5.12295e-06	3.4153e-06	0.135528
1829	8.05679e-05	1.01516e-05	6.76771e-06	0.26856
1830	3.91225e-05	4.92944e-06	3.28629e-06	0.130408
1831	2.35421e-05	2.96631e-06	1.97754e-06	0.0784737
1832	6.65689e-05	8.38768e-06	5.59179e-06	0.221896
1833	9.0387e-05	1.13888e-05	7.59251e-06	0.30129
1834	5.22937e-05	6.58901e-06	4.39267e-06	0.174312
1835	4.69336e-05	5.91363e-06	3.94242e-06	0.156445
1836	2.25701e-05	2.84383e-06	1.89589e-06	0.0752336
1837	2.68762e-05	3.3864e-06	2.2576e-06	0.0895873
1838	8.05631e-05	1.0151e-05	6.7673e-06	0.268544
1839	4.93026e-05	6.21213e-06	4.14142e-06	0.164342
1840	4.66246e-05	5.8747e-06	3.91646e-06	0.155415
1841	2.4948e-05	3.14345e-06	2.09563e-06	0.0831601
1842	4.20746e-05	5.3014e-06	3.53427e-06	0.140249
1843	3.84876e-05	4.84943e-06	3.23296e-06	0.128292
1844	5.92779e-05	7.46902e-06	4.97935e-06	0.197593
1845	3.36396e-05	4.23859e-06	2.82572e-06	0.112132
1846	3.90332e-05	4.91818e-06	3.27879e-06	0.130111
1847	1.84925e-05	2.33006e-06	1.55337e-06	0.0616417
1848	4.61984e-05	5.82099e-06	3.88066e-06	0.153995
1849	3.42188e-05	4.31157e-06	2.87438e-06	0.114063
1850	4.76231e-05	6.00052e-06	4.00034e-06	0.158744
1851	2.64052e-05	3.32706e-06	2.21804e-06	0.0880174
1852	4.00429e-05	5.04541e-06	3.3636e-06	0.133476
1853	5.93926e-05	7.48347e-06	4.98898e-06	0.197975
1854	6.1852e-05	7.79335e-06	5.19557e-06	0.206173
1855	4.00526e-05	5.04663e-06	3.36442e-06	0.133509
1856	4.63308e-05	5.83768e-06	3.89179e-06	0.154436
1857	5.22839e-05	6.58778e-06	4.39185e-06	0.17428
1858	4.1303e-05	5.20417e-06	3.46945e-06	0.137677
1859	1.96105e-05	2.47092e-06	1.64728e-06	0.0653683
1860	4.13929e-05	5.2155e-06	3.477e-06	0.137976
1861	4.06217e-05	5.11833e-06	3.41222e-06	0.135406
1862	6.99786e-05	8.81731e-06	5.87821e-06	0.233262
1863	6.97412e-05	8.7874e-06	5.85826e-06	0.232471
1864	3.70784e-05	4.67188e-06	3.11458e-06	0.123595
1865	5.36717e-05	6.76263e-06	4.50842e-06	0.178906
1866	0.000100689	1.26868e-05	8.45788e-06	0.33563
1867	6.11488e-05	7.70474e-06	5.1365e-06	0.203829
1868	4.7447e-05	5.97833e-06	3.98555e-06	0.158157
1869	4.91041e-05	6.18712e-06	4.12475e-06	0.16368
1870	4.68429e-05	5.9022e-06	3.9348e-06	0.156143
1871	5.67876e-05	7.15524e-06	4.77016e-06	0.189292
1872	4.1388e-05	5.21488e-06	3.47659e-06	0.13796
1873	6.19586e-05	7.80678e-06	5.20452e-06	0.206529
1874	3.06678e-05	3.86415e-06	2.5761e-06	0.102226
1875	7.6149e-05	9.59477e-06	6.39651e-06	0.25383
1876	4.68784e-05	5.90667e-06	3.93778e-06	0.156261
1877	3.71822e-05	4.68496e-06	3.12331e-06	0.123941
1878	2.67647e-05	3.37236e-06	2.24824e-06	0.0892158
1879	4.14598e-05	5.22394e-06	3.48262e-06	0.138199
1880	2.50607e-05	3.15765e-06	2.1051e-06	0.0835357
1881	5.0281e-05	6.33541e-06	4.2236e-06	0.167603
1882	2.70444e-05	3.40759e-06	2.27173e-06	0.090148
1883	4.18171e-05	5.26895e-06	3.51263e-06	0.13939
1884	4.0367e-05	5.08624e-06	3.39083e-06	0.134557
1885	3.62958e-05	4.57327e-06	3.04885e-06	0.120986
1886	2.1034e-05	2.65029e-06	1.76686e-06	0.0701135
1887	3.96079e-05	4.99059e-06	3.32706e-06	0.132026
1888	7.65451e-05	9.64469e-06	6.42979e-06	0.25515
1889	7.33926e-05	9.24747e-06	6.16498e-06	0.244642
1890	6.84751e-05	8.62786e-06	5.75191e-06	0.22825
1891	5.74134e-05	7.23409e-06	4.82273e-06	0.191378
1892	2.27538e-05	2.86698e-06	1.91132e-06	0.075846
1893	2.50126e-05	3.15158e-06	2.10106e-06	0.0833752
1894	4.04859e-05	5.10123e-06	3.40082e-06	0.134953
1895	5.1593e-05	6.50072e-06	4.33381e-06	0.171977
1896	3.88768e-05	4.89848e-06	3.26565e-06	0.129589
1897	5.34132e-05	6.73007e-06	4.48671e-06	0.178044
1898	3.04855e-05	3.84117e-06	2.56078e-06	0.101618
1899	1.56293e-05	1.9693e-06	1.31286e-06	0.0520978
1900	7.36956e-05	9.28564e-06	6.19043e-06	0.245652
1901	6.03358e-05	7.60231e-06	5.06821e-06	0.201119
1902	3.20997e-05	4.04456e-06	2.69638e-06	0.106999
1903	2.44042e-05	3.07492e-06	2.04995e-06	0.0813472
1904	4.69569e-05	5.91656e-06	3.94438e-06	0.156523
1905	2.93567e-05	3.69894e-06	2.46596e-06	0.0978556
1906	2.40485e-05	3.03011e-06	2.02007e-06	0.0801617
1907	5.67477e-05	7.15021e-06	4.76681e-06	0.189159
1908	5.53857e-05	6.9786e-06	4.6524e-06	0.184619
1909	2.60941e-05	3.28785e-06	2.1919e-06	0.0869802
1910	6.75456e-05	8.51075e-06	5.67383e-06	0.225152
1911	3.42228e-05	4.31207e-06	2.87471e-06	0.114076
1912	6.33292e-05	7.97948e-06	5.31965e-06	0.211097
1913	5.56763e-05	7.01521e-06	4.67681e-06	0.185588
1914	6.85685e-05	8.63963e-06	5.75976e-06	0.228562
1915	7.53161e-05	9.48983e-06	6.32655e-06	0.251054
1916	4.87117e-05	6.13768e-06	4.09179e-06	0.162372
1917	9.92048e-05	1.24998e-05	8.3332e-06	0.330683
1918	4.02736e-05	5.07447e-06	3.38298e-06	0.134245
1919	8.39492e-05	1.05776e-05	7.05173e-06	0.279831
1920	4.14794e-05	5.22641e-06	3.48427e-06	0.138265
1921	5.37856e-05	6.77698e-06	4.51799e-06	0.179285
1922	5.48085e-05	6.90587e-06	4.60391e-06	0.182695
1923	2.46521e-05	3.10617e-06	2.07078e-06	0.0821737
1924	0.000108681	1.36938e-05	9.12919e-06	0.36227
1925	3.0179e-05	3.80255e-06	2.53503e-06	0.100597
1926	4.06619e-05	5.1234e-06	3.4156e-06	0.13554
1927	0.00015143	1.90801e-05	1.27201e-05	0.504765
1928	4.08609e-05	5.14847e-06	3.43232e-06	0.136203
1929	5.98242e-05	7.53785e-06	5.02523e-06	0.199414
1930	6.60382e-05	8.32082e-06	5.54721e-06	0.220127
1931	4.69091e-05	5.91054e-06	3.94036e-06	0.156364
1932	6.16274e-05	7.76505e-06	5.1767e-06	0.205425
1933	8.79493e-05	1.10816e-05	7.38774e-06	0.293164
1934	5.18072e-05	6.52771e-06	4.35181e-06	0.172691
1935	4.98403e-05	6.27988e-06	4.18659e-06	0.166134
1936	5.13007e-05	6.46388e-06	4.30926e-06	0.171002
1937	3.85475e-05	4.85699e-06	3.23799e-06	0.128492
1938	6.27874e-05	7.91121e-06	5.27414e-06	0.209291
1939	7.88287e-05	9.93242e-06	6.62161e-06	0.262762
1940	3.81523e-05	4.80719e-06	3.20479e-06	0.127174
1941	7.20132e-05	9.07366e-06	6.04911e-06	0.240044
1942	2.64019e-05	3.32664e-06	2.21776e-06	0.0880064
1943	5.657e-05	7.12782e-06	4.75188e-06	0.188567
1944	1.77734e-05	2.23945e-06	1.49297e-06	0.0592448
1945	3.4337e-05	4.32646e-06	2.88431e-06	0.114457
1946	5.57918e-05	7.02977e-06	4.68651e-06	0.185973
1947	6.25814e-05	7.88526e-06	5.25684e-06	0.208605
1948	8.74354e-05	1.10169e-05	7.34458e-06	0.291451
1949	4.19084e-05	5.28046e-06	3.52031e-06	0.139695
1950	3.82763e-05	4.82282e-06	3.21521e-06	0.127588
1951	1.84105e-05	2.31972e-06	1.54648e-06	0.0613684
1952	1.60449e-05	2.02166e-06	1.34777e-06	0.053483
1953	6.08985e-05	7.67321e-06	5.11547e-06	0.202995
1954	5.29743e-05	6.67476e-06	4.44984e-06	0.176581
1955	3.64904e-05	4.59779e-06	3.06519e-06	0.121635
1956	3.92699e-05	4.94801e-06	3.29867e-06	0.1309
1957	3.88105e-05	4.89013e-06	3.26008e-06	0.129368
1958	4.85526e-05	6.11762e-06	4.07842e-06	0.161842
1959	4.50279e-05	5.67351e-06	3.78234e-06	0.150093
1960	5.38092e-05	6.77996e-06	4.51997e-06	0.179364
1961	8.39048e-05	1.0572e-05	7.048e-06	0.279683
1962	4.54133e-05	5.72208e-06	3.81472e-06	0.151378
1963	5.01566e-05	6.31973e-06	4.21316e-06	0.167189
1964	4.09373e-05	5.15811e-06	3.43874e-06	0.136458
1965	3.03294e-05	3.82151e-06	2.54767e-06	0.101098
1966	4.59484e-05	5.7895e-06	3.85967e-06	0.153161
1967	6.73298e-05	8.48355e-06	5.6557e-06	0.224433
1968	1.94356e-05	2.44888e-06	1.63259e-06	0.0647852
1969	3.33683e-05	4.2044e-06	2.80294e-06	0.111228
1970	4.03954e-05	5.08982e-06	3.39322e-06	0.134651
1971	2.5553e-05	3.21968e-06	2.14645e-06	0.0851767
1972	8.02531e-05	1.01119e-05	6.74126e-06	0.26751
1973	4.41045e-05	5.55716e-06	3.70477e-06	0.147015
1974	3.80911e-05	4.79948e-06	3.19965e-06	0.12697
1975	7.17567e-05	9.04134e-06	6.02756e-06	0.239189
1976	6.90662e-05	8.70235e-06	5.80156e-06	0.230221
1977	3.63682e-05	4.58239e-06	3.05493e-06	0.121227
1978	3.05243e-05	3.84607e-06	2.56404e-06	0.101748
1979	1.9836e-05	2.49934e-06	1.66622e-06	0.06612
1980	3.18277e-05	4.01029e-06	2.67352e-06	0.106092
1981	3.28887e-05	4.14398e-06	2.76265e-06	0.109629
1982	5.73186e-05	7.22215e-06	4.81476e-06	0.191062
1983	2.61537e-05	3.29536e-06	2.19691e-06	0.0871789
1984	2.65686e-05	3.34765e-06	2.23177e-06	0.0885621
1985	7.40081e-05	9.32502e-06	6.21668e-06	0.246694
1986	2.57269e-05	3.24159e-06	2.16106e-06	0.0857563
1987	3.55446e-05	4.47861e-06	2.98574e-06	0.118482
1988	0.00010596	1.3351e-05	8.90067e-06	0.353201
1989	4.24967e-05	5.35458e-06	3.56972e-06	0.141656
1990	3.91548e-05	4.9335e-06	3.289e-06	0.130516
1991	4.44738e-05	5.6037e-06	3.7358e-06	0.148246
1992	2.93753e-05	3.70129e-06	2.46753e-06	0.0979178
1993	3.48319e-05	4.38882e-06	2.92588e-06	0.116106
1994	3.75023e-05	4.72529e-06	3.15019e-06	0.125008
1995	8.1699e-05	1.02941e-05	6.86271e-06	0.27233
1996	2.66481e-05	3.35766e-06	2.23844e-06	0.0888269
1997	3.15235e-05	3.97196e-06	2.64797e-06	0.105078
1998	5.06122e-05	6.37714e-06	4.25143e-06	0.168707
1999	6.77602e-05	8.53778e-06	5.69185e-06	0.225867
[truncated: 8,001 more rows]
