# Supplementary material for: Health risk assessment from habitants of Araró, Michoacán, México, exposed to arsenic by dust, using Monte Carlo probabilistic method
Source: PeerJ. 2025 Jun 10;13:e18805. doi: 10.7717/peerj.18805 (PMC12164815; doi:10.7717/peerj.18805)
Supplement: Supplemental Information 10 [file peerj-13-18805-s010.xlsx]

## Sheet: Risk Premises
Study Title:	Inhalación premisas simulación.					Last simulation run:
Study File:	Inhalación premisas simulación.xlsx					2022-11-07 11:42:05
	Output Cells	Histogram settings				Multi-cell output range names
Description for Reports	Range Names	Min value	Max value	Step size		title row or column (optional)
	ADD	Auto	Auto	Auto
	ADD_carc	Auto	Auto	Auto
	CR	Auto	Auto	Auto
	HQ	Auto	Auto	Auto
		Study	Min				Max
	Input Cells	File	Allowed		Expected		Allowed
Description for Reports	Range Names	Values	Values	10/90	Values	90/10	Values	Distributions	Parameters and chart settings
	BW	16.61	3.81	10.9955	16.6355	22.252	39	Normal	Mean	16.61	std dev	4.39875	X Axis Min	auto	X Axis Max	auto
	Conc	15.6	5.94	10.1171	15.7996	21.5085	42.53	Normal	Mean	15.6	std dev	4.57375	X Axis Min	auto	X Axis Max	auto
	ED	3.51	2	3.02944	3.50999	3.99077	5	Normal	Mean	3.51	std dev	0.375	X Axis Min	auto	X Axis Max	auto

## Sheet: Simulation Summary
	10000	Simulations run
					Change in expected values as simulations increase									Change in standard deviation as simulations increase
	Minimum result	Maximum result	Expected value	Std deviation	125	250	500	1000	2000	4000	8000	10000		125	250	500	1000	2000	4000	8000	10000
ADD	1.46279e-09	3.88057e-08	7.23993e-09	3.34677e-09	-	0.0690578	0.0248321	0.0184543	-0.00530752	0.00657961	-0.00132252	-0.000871462		-	0.193797	0.0207676	-0.00502083	0.0175668	0.0543229	0.00600667	0.000974846
ADD_carc	7.03628e-11	1.86662e-09	3.48254e-10	1.60985e-10	-	0.0690578	0.0248321	0.0184543	-0.00530752	0.00657961	-0.00132252	-0.000871462		-	0.193797	0.0207676	-0.00502083	0.0175668	0.0543229	0.00600667	0.000974846
CR	5.86357e-12	1.55552e-10	2.90211e-11	1.34154e-11	-	0.0690578	0.0248321	0.0184543	-0.00530752	0.00657961	-0.00132252	-0.000871462		-	0.193797	0.0207676	-0.00502083	0.0175668	0.0543229	0.00600667	0.000974846
HQ	9.75194e-05	0.00258705	0.000482662	0.000223118	-	0.0690578	0.0248321	0.0184543	-0.00530752	0.00657961	-0.00132252	-0.000871462		-	0.193797	0.0207676	-0.00502083	0.0175668	0.0543229	0.00600667	0.000974846

## Sheet: Simulation variance
This worksheet shows the convergence of the output variables as a function of the number of simulations
You should run enough simulations until the % change is very small, typically < 1.0%
ADD
	# of Sims	125	250	500	1000	2000	4000	8000	10000
	Avg Value	6.49465e-09	6.94315e-09	7.11557e-09	7.24688e-09	7.20842e-09	7.25584e-09	7.24625e-09	7.23993e-09
	% Chg		0.0690578	0.0248321	0.0184543	-0.00530752	0.00657961	-0.00132252	-0.000871462
	Std Dev.	2.55501e-09	3.05017e-09	3.11351e-09	3.09788e-09	3.1523e-09	3.32354e-09	3.34351e-09	3.34677e-09
	% Chg		0.193797	0.0207676	-0.00502083	0.0175668	0.0543229	0.00600667	0.000974846
ADD_carc
	# of Sims	125	250	500	1000	2000	4000	8000	10000
	Avg Value	3.12404e-10	3.33978e-10	3.42271e-10	3.48588e-10	3.46738e-10	3.49019e-10	3.48557e-10	3.48254e-10
	% Chg		0.0690578	0.0248321	0.0184543	-0.00530752	0.00657961	-0.00132252	-0.000871462
	Std Dev.	1.22901e-10	1.46719e-10	1.49766e-10	1.49014e-10	1.51631e-10	1.59868e-10	1.60829e-10	1.60985e-10
	% Chg		0.193797	0.0207676	-0.00502083	0.0175668	0.0543229	0.00600667	0.000974846
CR
	# of Sims	125	250	500	1000	2000	4000	8000	10000
	Avg Value	2.60337e-11	2.78315e-11	2.85226e-11	2.9049e-11	2.88948e-11	2.90849e-11	2.90464e-11	2.90211e-11
	% Chg		0.0690578	0.0248321	0.0184543	-0.00530752	0.00657961	-0.00132252	-0.000871462
	Std Dev.	1.02417e-11	1.22265e-11	1.24805e-11	1.24178e-11	1.26359e-11	1.33224e-11	1.34024e-11	1.34154e-11
	% Chg		0.193797	0.0207676	-0.00502083	0.0175668	0.0543229	0.00600667	0.000974846
HQ
	# of Sims	125	250	500	1000	2000	4000	8000	10000
	Avg Value	0.000432977	0.000462877	0.000474371	0.000483125	0.000480561	0.000483723	0.000483083	0.000482662
	% Chg		0.0690578	0.0248321	0.0184543	-0.00530752	0.00657961	-0.00132252	-0.000871462
	Std Dev.	0.000170334	0.000203345	0.000207568	0.000206525	0.000210153	0.00022157	0.0002229	0.000223118
	% Chg		0.193797	0.0207676	-0.00502083	0.0175668	0.0543229	0.00600667	0.000974846

## Sheet: ADD Results
ADD Results
Minimum result	1.46279e-09				6.55787e-09	Study value
Maximum result	3.88057e-08				0.4915	of results are equal or lower
Expected value	7.23993e-09				0.5085	of results are equal or greater
Std Deviation	3.34677e-09
Out of 10000 simulations		Of those with numeric values:
10000 had numeric values.			5% <=	3.27971e-09
0 had error values.			10% <=	3.89234e-09
			15% <=	4.35706e-09
			20% <=	4.72015e-09
			25% <=	5.04269e-09
			30% <=	5.34043e-09
			35% <=	5.63199e-09
			40% <=	5.9388e-09
			45% <=	6.28568e-09
			50% <=	6.6109e-09
			55% <=	6.94069e-09
			60% <=	7.28943e-09
			65% <=	7.67277e-09
			70% <=	8.12119e-09
			75% <=	8.66108e-09
			80% <=	9.24748e-09
			85% <=	1.00565e-08
			90% <=	1.12127e-08
			95% <=	1.32044e-08
			100% <=	3.88057e-08
If ADD is:				6.55787e-09	0.4915	of results are equal or lower
(Chg to do what ifs)					0.5085	of results are greater
					Cumulative				Cumulative
ADD	frequency:				frequency:				frequency:
<=1.46279E-09	1	0.0001		<=1.46279E-09	1	0.0001		=>1.46279E-09	10000	1
1.46279E-09 to 3.42821E-09	605	0.0605		<=3.42821E-09	606	0.0606		=>3.42821E-09	9394	0.9394
3.42821E-09 to 5.39362E-09	2475	0.2475		<=5.39362E-09	3081	0.3081		=>5.39362E-09	6919	0.6919
5.39362E-09 to 7.35904E-09	3010	0.301		<=7.35904E-09	6091	0.6091		=>7.35904E-09	3909	0.3909
7.35904E-09 to 9.32445E-09	1963	0.1963		<=9.32445E-09	8054	0.8054		=>9.32445E-09	1946	0.1946
9.32445E-09 to 1.12899E-08	979	0.0979		<=1.12899E-08	9033	0.9033		=>1.12899E-08	967	0.0967
1.12899E-08 to 1.32553E-08	471	0.0471		<=1.32553E-08	9504	0.9504		=>1.32553E-08	496	0.0496
1.32553E-08 to 1.52207E-08	218	0.0218		<=1.52207E-08	9722	0.9722		=>1.52207E-08	278	0.0278
1.52207E-08 to 1.71861E-08	118	0.0118		<=1.71861E-08	9840	0.984		=>1.71861E-08	160	0.016
1.71861E-08 to 1.91515E-08	62	0.0062		<=1.91515E-08	9902	0.9902		=>1.91515E-08	98	0.0098
1.91515E-08 to 2.11169E-08	36	0.0036		<=2.11169E-08	9938	0.9938		=>2.11169E-08	62	0.0062
2.11169E-08 to 2.30824E-08	21	0.0021		<=2.30824E-08	9959	0.9959		=>2.30824E-08	41	0.0041
2.30824E-08 to 2.50478E-08	20	0.002		<=2.50478E-08	9979	0.9979		=>2.50478E-08	21	0.0021
2.50478E-08 to 2.70132E-08	6	0.0006		<=2.70132E-08	9985	0.9985		=>2.70132E-08	15	0.0015
2.70132E-08 to 2.89786E-08	5	0.0005		<=2.89786E-08	9990	0.999		=>2.89786E-08	10	0.001
2.89786E-08 to 3.0944E-08	2	0.0002		<=3.0944E-08	9992	0.9992		=>3.0944E-08	8	0.0008
3.0944E-08 to 3.29094E-08	1	0.0001		<=3.29094E-08	9993	0.9993		=>3.29094E-08	7	0.0007
3.29094E-08 to 3.48749E-08	1	0.0001		<=3.48749E-08	9994	0.9994		=>3.48749E-08	6	0.0006
3.48749E-08 to 3.68403E-08	3	0.0003		<=3.68403E-08	9997	0.9997		=>3.68403E-08	3	0.0003
3.68403E-08 to 3.88057E-08	3	0.0003		<=3.88057E-08	10000	1		=>3.88057E-08	1	0.0001
>3.88057E-08	0	0
Bin Size	1.96542e-09
Number of bins	21
# of Sims	Avg Value	% Chg		Std Dev.	% Chg
125	6.49465e-09			2.55501e-09
250	6.94315e-09	0.0690578		3.05017e-09	0.193797
500	7.11557e-09	0.0248321		3.11351e-09	0.0207676
1000	7.24688e-09	0.0184543		3.09788e-09	-0.00502083
2000	7.20842e-09	-0.00530752		3.1523e-09	0.0175668
4000	7.25584e-09	0.00657961		3.32354e-09	0.0543229
8000	7.24625e-09	-0.00132252		3.34351e-09	0.00600667
10000	7.23993e-09	-0.000871462		3.34677e-09	0.000974846

## Sheet: ADD_carc Results
ADD carc Results
Minimum result	7.03628e-11				3.15445e-10	Study value
Maximum result	1.86662e-09				0.4915	of results are equal or lower
Expected value	3.48254e-10				0.5085	of results are equal or greater
Std Deviation	1.60985e-10
Out of 10000 simulations		Of those with numeric values:
10000 had numeric values.			5% <=	1.5776e-10
0 had error values.			10% <=	1.87228e-10
			15% <=	2.09582e-10
			20% <=	2.27047e-10
			25% <=	2.42562e-10
			30% <=	2.56884e-10
			35% <=	2.70908e-10
			40% <=	2.85667e-10
			45% <=	3.02352e-10
			50% <=	3.17996e-10
			55% <=	3.3386e-10
			60% <=	3.50634e-10
			65% <=	3.69074e-10
			70% <=	3.90644e-10
			75% <=	4.16613e-10
			80% <=	4.4482e-10
			85% <=	4.83735e-10
			90% <=	5.39352e-10
			95% <=	6.35155e-10
			100% <=	1.86662e-09
If ADD carc is:				3.15445e-10	0.4915	of results are equal or lower
(Chg to do what ifs)					0.5085	of results are greater
					Cumulative				Cumulative
ADD carc	frequency:				frequency:				frequency:
<=7.03628E-11	1	0.0001		<=7.03628E-11	1	0.0001		=>7.03628E-11	10000	1
7.03628E-11 to 1.64903E-10	605	0.0605		<=1.64903E-10	606	0.0606		=>1.64903E-10	9394	0.9394
1.64903E-10 to 2.59443E-10	2475	0.2475		<=2.59443E-10	3081	0.3081		=>2.59443E-10	6919	0.6919
2.59443E-10 to 3.53983E-10	3010	0.301		<=3.53983E-10	6091	0.6091		=>3.53983E-10	3909	0.3909
3.53983E-10 to 4.48523E-10	1963	0.1963		<=4.48523E-10	8054	0.8054		=>4.48523E-10	1946	0.1946
4.48523E-10 to 5.43063E-10	979	0.0979		<=5.43063E-10	9033	0.9033		=>5.43063E-10	967	0.0967
5.43063E-10 to 6.37603E-10	471	0.0471		<=6.37603E-10	9504	0.9504		=>6.37603E-10	496	0.0496
6.37603E-10 to 7.32143E-10	218	0.0218		<=7.32143E-10	9722	0.9722		=>7.32143E-10	278	0.0278
7.32143E-10 to 8.26683E-10	118	0.0118		<=8.26683E-10	9840	0.984		=>8.26683E-10	160	0.016
8.26683E-10 to 9.21222E-10	62	0.0062		<=9.21222E-10	9902	0.9902		=>9.21222E-10	98	0.0098
9.21222E-10 to 1.01576E-09	36	0.0036		<=1.01576E-09	9938	0.9938		=>1.01576E-09	62	0.0062
1.01576E-09 to 1.1103E-09	21	0.0021		<=1.1103E-09	9959	0.9959		=>1.1103E-09	41	0.0041
1.1103E-09 to 1.20484E-09	20	0.002		<=1.20484E-09	9979	0.9979		=>1.20484E-09	21	0.0021
1.20484E-09 to 1.29938E-09	6	0.0006		<=1.29938E-09	9985	0.9985		=>1.29938E-09	15	0.0015
1.29938E-09 to 1.39392E-09	5	0.0005		<=1.39392E-09	9990	0.999		=>1.39392E-09	10	0.001
1.39392E-09 to 1.48846E-09	2	0.0002		<=1.48846E-09	9992	0.9992		=>1.48846E-09	8	0.0008
1.48846E-09 to 1.583E-09	1	0.0001		<=1.583E-09	9993	0.9993		=>1.583E-09	7	0.0007
1.583E-09 to 1.67754E-09	1	0.0001		<=1.67754E-09	9994	0.9994		=>1.67754E-09	6	0.0006
1.67754E-09 to 1.77208E-09	3	0.0003		<=1.77208E-09	9997	0.9997		=>1.77208E-09	3	0.0003
1.77208E-09 to 1.86662E-09	3	0.0003		<=1.86662E-09	10000	1		=>1.86662E-09	1	0.0001
>1.86662E-09	0	0
Bin Size	9.454e-11
Number of bins	21
# of Sims	Avg Value	% Chg		Std Dev.	% Chg
125	3.12404e-10			1.22901e-10
250	3.33978e-10	0.0690578		1.46719e-10	0.193797
500	3.42271e-10	0.0248321		1.49766e-10	0.0207676
1000	3.48588e-10	0.0184543		1.49014e-10	-0.00502083
2000	3.46738e-10	-0.00530752		1.51631e-10	0.0175668
4000	3.49019e-10	0.00657961		1.59868e-10	0.0543229
8000	3.48557e-10	-0.00132252		1.60829e-10	0.00600667
10000	3.48254e-10	-0.000871462		1.60985e-10	0.000974846

## Sheet: CR Results
CR Results
Minimum result	5.86357e-12				2.62871e-11	Study value
Maximum result	1.55552e-10				0.4915	of results are equal or lower
Expected value	2.90211e-11				0.5085	of results are equal or greater
Std Deviation	1.34154e-11
Out of 10000 simulations		Of those with numeric values:
10000 had numeric values.			5% <=	1.31466e-11
0 had error values.			10% <=	1.56024e-11
			15% <=	1.74652e-11
			20% <=	1.89206e-11
			25% <=	2.02135e-11
			30% <=	2.1407e-11
			35% <=	2.25757e-11
			40% <=	2.38056e-11
			45% <=	2.5196e-11
			50% <=	2.64997e-11
			55% <=	2.78216e-11
			60% <=	2.92195e-11
			65% <=	3.07561e-11
			70% <=	3.25536e-11
			75% <=	3.47178e-11
			80% <=	3.70683e-11
			85% <=	4.03112e-11
			90% <=	4.4946e-11
			95% <=	5.29296e-11
			100% <=	1.55552e-10
If CR is:				2.62871e-11	0.4915	of results are equal or lower
(Chg to do what ifs)					0.5085	of results are greater
					Cumulative				Cumulative
CR	frequency:				frequency:				frequency:
<=5.86357E-12	1	0.0001		<=5.86357E-12	1	0.0001		=>5.86357E-12	10000	1
5.86357E-12 to 1.37419E-11	605	0.0605		<=1.37419E-11	606	0.0606		=>1.37419E-11	9394	0.9394
1.37419E-11 to 2.16202E-11	2475	0.2475		<=2.16202E-11	3081	0.3081		=>2.16202E-11	6919	0.6919
2.16202E-11 to 2.94986E-11	3010	0.301		<=2.94986E-11	6091	0.6091		=>2.94986E-11	3909	0.3909
2.94986E-11 to 3.73769E-11	1963	0.1963		<=3.73769E-11	8054	0.8054		=>3.73769E-11	1946	0.1946
3.73769E-11 to 4.52552E-11	979	0.0979		<=4.52552E-11	9033	0.9033		=>4.52552E-11	967	0.0967
4.52552E-11 to 5.31335E-11	471	0.0471		<=5.31335E-11	9504	0.9504		=>5.31335E-11	496	0.0496
5.31335E-11 to 6.10119E-11	218	0.0218		<=6.10119E-11	9722	0.9722		=>6.10119E-11	278	0.0278
6.10119E-11 to 6.88902E-11	118	0.0118		<=6.88902E-11	9840	0.984		=>6.88902E-11	160	0.016
6.88902E-11 to 7.67685E-11	62	0.0062		<=7.67685E-11	9902	0.9902		=>7.67685E-11	98	0.0098
7.67685E-11 to 8.46469E-11	36	0.0036		<=8.46469E-11	9938	0.9938		=>8.46469E-11	62	0.0062
8.46469E-11 to 9.25252E-11	21	0.0021		<=9.25252E-11	9959	0.9959		=>9.25252E-11	41	0.0041
9.25252E-11 to 1.00404E-10	20	0.002		<=1.00404E-10	9979	0.9979		=>1.00404E-10	21	0.0021
1.00404E-10 to 1.08282E-10	6	0.0006		<=1.08282E-10	9985	0.9985		=>1.08282E-10	15	0.0015
1.08282E-10 to 1.1616E-10	5	0.0005		<=1.1616E-10	9990	0.999		=>1.1616E-10	10	0.001
1.1616E-10 to 1.24039E-10	2	0.0002		<=1.24039E-10	9992	0.9992		=>1.24039E-10	8	0.0008
1.24039E-10 to 1.31917E-10	1	0.0001		<=1.31917E-10	9993	0.9993		=>1.31917E-10	7	0.0007
1.31917E-10 to 1.39795E-10	1	0.0001		<=1.39795E-10	9994	0.9994		=>1.39795E-10	6	0.0006
1.39795E-10 to 1.47674E-10	3	0.0003		<=1.47674E-10	9997	0.9997		=>1.47674E-10	3	0.0003
1.47674E-10 to 1.55552E-10	3	0.0003		<=1.55552E-10	10000	1		=>1.55552E-10	1	0.0001
>1.55552E-10	0	0
Bin Size	7.87833e-12
Number of bins	21
# of Sims	Avg Value	% Chg		Std Dev.	% Chg
125	2.60337e-11			1.02417e-11
250	2.78315e-11	0.0690578		1.22265e-11	0.193797
500	2.85226e-11	0.0248321		1.24805e-11	0.0207676
1000	2.9049e-11	0.0184543		1.24178e-11	-0.00502083
2000	2.88948e-11	-0.00530752		1.26359e-11	0.0175668
4000	2.90849e-11	0.00657961		1.33224e-11	0.0543229
8000	2.90464e-11	-0.00132252		1.34024e-11	0.00600667
10000	2.90211e-11	-0.000871462		1.34154e-11	0.000974846

## Sheet: HQ Results
HQ Results
Minimum result	9.75194e-05				0.000437191	Study value
Maximum result	0.00258705				0.4915	of results are equal or lower
Expected value	0.000482662				0.5085	of results are equal or greater
Std Deviation	0.000223118
Out of 10000 simulations		Of those with numeric values:
10000 had numeric values.			5% <=	0.000218647
0 had error values.			10% <=	0.000259489
			15% <=	0.000290471
			20% <=	0.000314676
			25% <=	0.000336179
			30% <=	0.000356029
			35% <=	0.000375466
			40% <=	0.00039592
			45% <=	0.000419046
			50% <=	0.000440726
			55% <=	0.000462713
			60% <=	0.000485962
			65% <=	0.000511518
			70% <=	0.000541413
			75% <=	0.000577405
			80% <=	0.000616499
			85% <=	0.000670433
			90% <=	0.000747515
			95% <=	0.000880294
			100% <=	0.00258705
If HQ is:				0.000437191	0.4915	of results are equal or lower
(Chg to do what ifs)					0.5085	of results are greater
					Cumulative				Cumulative
HQ	frequency:				frequency:				frequency:
<=9.75194E-05	1	0.0001		<=9.75194E-05	1	0.0001		=>9.75194E-05	10000	1
9.75194E-05 to 0.000228547	605	0.0605		<=0.000228547	606	0.0606		=>0.000228547	9394	0.9394
0.000228547 to 0.000359575	2475	0.2475		<=0.000359575	3081	0.3081		=>0.000359575	6919	0.6919
0.000359575 to 0.000490603	3010	0.301		<=0.000490603	6091	0.6091		=>0.000490603	3909	0.3909
0.000490603 to 0.00062163	1963	0.1963		<=0.00062163	8054	0.8054		=>0.00062163	1946	0.1946
0.00062163 to 0.000752658	979	0.0979		<=0.000752658	9033	0.9033		=>0.000752658	967	0.0967
0.000752658 to 0.000883686	471	0.0471		<=0.000883686	9504	0.9504		=>0.000883686	496	0.0496
0.000883686 to 0.001014713	218	0.0218		<=0.001014713	9722	0.9722		=>0.001014713	278	0.0278
0.001014713 to 0.001145741	118	0.0118		<=0.001145741	9840	0.984		=>0.001145741	160	0.016
0.001145741 to 0.001276769	62	0.0062		<=0.001276769	9902	0.9902		=>0.001276769	98	0.0098
0.001276769 to 0.001407797	36	0.0036		<=0.001407797	9938	0.9938		=>0.001407797	62	0.0062
0.001407797 to 0.001538824	21	0.0021		<=0.001538824	9959	0.9959		=>0.001538824	41	0.0041
0.001538824 to 0.001669852	20	0.002		<=0.001669852	9979	0.9979		=>0.001669852	21	0.0021
0.001669852 to 0.00180088	6	0.0006		<=0.00180088	9985	0.9985		=>0.00180088	15	0.0015
0.00180088 to 0.001931907	5	0.0005		<=0.001931907	9990	0.999		=>0.001931907	10	0.001
0.001931907 to 0.002062935	2	0.0002		<=0.002062935	9992	0.9992		=>0.002062935	8	0.0008
0.002062935 to 0.002193963	1	0.0001		<=0.002193963	9993	0.9993		=>0.002193963	7	0.0007
0.002193963 to 0.002324991	1	0.0001		<=0.002324991	9994	0.9994		=>0.002324991	6	0.0006
0.002324991 to 0.002456018	3	0.0003		<=0.002456018	9997	0.9997		=>0.002456018	3	0.0003
0.002456018 to 0.002587046	3	0.0003		<=0.002587046	10000	1		=>0.002587046	1	0.0001
>0.002587046	0	0
Bin Size	0.000131028
Number of bins	21
# of Sims	Avg Value	% Chg		Std Dev.	% Chg
125	0.000432977			0.000170334
250	0.000462877	0.0690578		0.000203345	0.193797
500	0.000474371	0.0248321		0.000207568	0.0207676
1000	0.000483125	0.0184543		0.000206525	-0.00502083
2000	0.000480561	-0.00530752		0.000210153	0.0175668
4000	0.000483723	0.00657961		0.00022157	0.0543229
8000	0.000483083	-0.00132252		0.0002229	0.00600667
10000	0.000482662	-0.000871462		0.000223118	0.000974846

## Sheet: Simulation Input Values 1
Sim #	BW	Conc	ED
1	18.0776	13.6656	3.45043
2	22.8071	19.4426	3.04997
3	16.8746	17.7899	3.69109
4	12.4885	14.6173	2.61349
5	24.8907	19.3862	3.38781
6	22.7575	10.6855	3.86019
7	22.4934	17.8342	4.11052
8	14.7207	20.7331	3.60374
9	10.7286	15.7213	3.7642
10	24.6278	11.757	3.8225
11	14.1816	14.3913	2.70809
12	14.0851	13.0142	3.31886
13	21.187	13.7212	3.683
14	18.7367	13.0923	3.53013
15	21.688	10.2224	3.12674
16	18.8358	13.6896	2.88133
17	18.6831	14.8324	3.41331
18	14.0155	17.557	3.3597
19	19.7329	20.1416	3.56139
20	19.5255	16.7512	3.45564
21	18.2337	7.29532	3.32767
22	20.5076	12.4948	3.34353
23	15.0201	10.7555	3.01625
24	16.7572	21.2498	3.54298
25	13.0249	16.3998	3.80375
26	23.1229	8.4523	3.12109
27	21.9341	13.6484	4.13173
28	15.5954	16.2063	3.26819
29	18.434	9.15654	3.4087
30	15.8202	13.5646	3.82865
31	14.3099	18.4233	3.60398
32	18.9552	18.1151	3.43892
33	6.9752	12.084	3.05614
34	17.5797	17.3783	3.17678
35	20.8638	19.8138	2.68624
36	12.0865	6.99602	3.20518
37	12.4785	23.8175	4.21775
38	16.6992	11.0514	3.60238
39	17.0946	16.9515	3.60556
40	13.3726	6.79858	3.2736
41	17.8707	16.4685	3.0306
42	25.1537	22.8605	3.46447
43	11.2899	12.6624	3.37679
44	17.9492	16.7466	2.99459
45	14.2246	20.4448	2.86073
46	17.2465	18.2947	3.29092
47	22.0326	21.2626	3.33363
48	23.3125	19.9391	3.61221
49	20.9945	16.9974	3.29401
50	25.7288	18.9217	4.145
51	12.8008	18.7176	3.18033
52	19.1951	7.04549	2.97292
53	24.2999	14.8737	2.92046
54	19.2397	8.87422	3.16752
55	21.1277	16.0969	3.31634
56	18.5942	7.99764	3.12006
57	11.2863	16.8609	3.41316
58	21.9795	19.0719	3.22461
59	27.3511	7.53859	3.79242
60	11.7219	19.4384	3.26868
61	15.9329	14.5298	3.43723
62	14.2925	20.149	3.98528
63	11.4908	22.869	4.05836
64	20.5526	8.99048	3.22683
65	22.9117	16.2915	3.97158
66	21.5498	23.5787	3.82521
67	15.3139	24.0816	3.8194
68	17.5213	9.85732	3.86215
69	25.7718	27.0717	3.20642
70	19.4737	19.3388	3.08073
71	15.0278	21.457	3.75729
72	13.6133	13.3466	3.36056
73	19.7049	14.5171	3.49503
74	11.6594	18.5718	3.69941
75	12.3571	18.0297	3.42899
76	19.7066	24.1354	3.55248
77	15.3642	16.5307	3.53325
78	10.0719	15.5539	3.48579
79	16.0085	18.6917	3.38219
80	15.0752	15.8752	3.53477
81	13.7267	13.123	3.17513
82	15.8388	10.3198	3.19286
83	12.8196	15.4419	4.17929
84	22.6309	16.7887	3.89406
85	15.2028	14.9827	4.15152
86	12.6998	14.4411	3.49535
87	19.558	13.7251	3.6018
88	12.3947	10.2496	3.18851
89	15.1129	9.89052	3.85055
90	20.8124	16.0053	3.63731
91	15.3803	21.6515	3.16419
92	14.7266	17.3055	3.32599
93	18.9247	19.5705	3.37088
94	9.13065	11.1417	3.68291
95	12.9951	13.9627	3.9298
96	21.4555	11.0369	3.15637
97	10.9096	10.0971	3.63269
98	17.5038	17.7441	3.19181
99	11.6667	8.63946	3.51791
100	11.6201	13.7994	3.64814
101	14.7124	11.9606	3.67088
102	13.1513	12.9075	3.64858
103	20.7263	17.1282	3.60941
104	12.9089	19.4713	2.75018
105	19.2682	11.743	4.12916
106	15.2705	15.3655	3.71139
107	15.4981	14.314	3.63422
108	25.0655	17.8449	3.50644
109	18.2595	11.0904	3.65913
110	13.5584	18.1694	3.29425
111	17.5153	20.3022	4.48853
112	15.4935	16.5751	2.77628
113	12.1742	9.42394	3.25958
114	10.1542	10.2645	3.09616
115	17.0283	11.5627	3.01711
116	16.5062	21.4547	2.94594
117	20.6739	15.3155	3.69729
118	18.9879	10.0502	3.2325
119	20.3465	15.6006	3.60262
120	15.7139	16.1626	3.56921
121	19.5848	11.5337	3.84677
122	14.361	10.884	3.37187
123	15.9844	12.6931	2.37869
124	21.8805	20.8289	3.1633
125	22.0072	16.3607	2.83254
126	14.5902	19.6222	4.32391
127	16.4857	9.24959	3.43805
128	19.1597	19.6765	3.79706
129	17.4631	19.3125	3.25865
130	19.5531	8.70197	3.39146
131	17.6669	17.6971	3.65731
132	19.5485	13.5857	3.15154
133	14.6953	15.4719	2.77122
134	17.5441	20.2098	4.08915
135	24.933	9.90685	3.45429
136	22.2422	9.02179	2.98489
137	22.4165	16.6296	4.65442
138	17.5578	19.7159	3.8857
139	17.1462	12.6966	2.90809
140	17.3251	13.4218	3.41221
141	17.5214	14.8903	3.57977
142	13.5328	15.0338	3.93532
143	15.5638	16.7498	2.95101
144	12.9644	9.95482	3.65058
145	19.0929	10.9994	3.86058
146	6.99134	13.2739	3.54992
147	15.9285	10.1778	3.42866
148	13.047	18.1496	3.74086
149	16.9348	12.516	3.68246
150	20.5723	16.4739	3.46766
151	14.0498	16.7929	3.68301
152	6.77735	12.7522	4.02496
153	12.5109	15.1905	3.34004
154	19.5752	21.2472	4.00579
155	16.3575	9.86367	3.64856
156	16.0159	18.2348	2.91786
157	7.07325	21.4631	4.00464
158	10.7365	14.0133	3.76412
159	22.4422	17.6833	3.02015
160	14.915	25.0847	3.01713
161	12.4602	14.0727	3.43673
162	16.85	21.0662	3.51495
163	16.1137	13.864	3.9133
164	15.8595	14.0658	3.79667
165	14.7166	21.7706	3.62124
166	18.4909	18.1596	4.06324
167	15.3951	9.76055	3.39453
168	13.7855	17.4357	3.81031
169	11.4723	20.7221	3.58153
170	9.20139	16.1495	3.24633
171	19.6283	20.8926	3.21188
172	7.99087	13.3324	3.74217
173	14.5808	22.0271	3.20665
174	16.9591	17.7609	3.84988
175	20.9659	22.1844	3.99958
176	12.7889	20.1036	3.83818
177	21.3826	18.5848	3.15625
178	10.8213	14.2708	3.29323
179	16.2705	18.2328	3.2285
180	21.6877	16.6082	4.0167
181	13.6402	12.3486	3.46323
182	19.1477	21.2981	3.38453
183	11.5268	18.7323	3.93244
184	15.9774	10.7168	3.22684
185	11.4166	23.2768	3.00709
186	12.8683	9.78633	3.43817
187	11.133	19.4371	3.4516
188	17.2525	15.8989	3.341
189	19.595	11.5356	3.17119
190	25.0378	11.9183	3.9265
191	13.27	20.5859	3.76883
192	20.9963	18.3861	3.33072
193	19.3806	10.2191	3.49008
194	17.2153	19.5272	3.83791
195	24.9203	17.3628	2.91775
196	18.7521	17.7664	3.74033
197	15.7287	7.14337	3.59402
198	15.8679	13.1564	3.71031
199	23.0364	16.8376	3.46358
200	16.2319	12.0111	3.27487
201	12.1195	16.4082	3.52295
202	20.1755	16.4231	3.58648
203	23.4498	14.2948	3.421
204	16.0975	14.909	3.80293
205	20.1117	20.6283	3.82466
206	12.6078	14.5612	3.80721
207	22.5123	15.2575	4.06353
208	14.5329	13.0263	3.67351
209	17.7201	18.9038	3.86951
210	18.1107	11.0734	4.17287
211	21.1387	25.7538	3.90505
212	14.4629	14.9457	3.48097
213	14.6389	14.2381	2.68609
214	18.4484	12.9603	3.14913
215	24.3119	11.2518	4.18707
216	19.4741	16.9895	3.30653
217	17.0911	14.593	3.64029
218	15.6248	22.6645	3.23576
219	15.6342	17.0996	3.98855
220	19.8134	19.6654	3.66859
221	14.6801	10.0043	3.06503
222	27.0276	20.8463	3.12452
223	13.2753	12.2121	3.74623
224	10.6796	9.77765	3.80499
225	19.729	11.6521	3.50352
226	19.4078	18.9227	3.87003
227	21.5648	26.079	3.06141
228	19.1932	17.1648	3.65038
229	17.1588	15.0985	3.57629
230	18.4778	12.6842	3.27577
231	17.1767	18.542	3.23163
232	8.59114	15.4803	3.46073
233	20.1195	16.3226	3.5483
234	18.1108	15.1732	3.00454
235	17.2345	8.25786	2.88079
236	9.35099	19.2593	3.27847
237	22.9613	9.67195	3.88238
238	19.9675	17.4741	3.38282
239	21.5728	14.6165	3.83541
240	26.8772	8.01647	4.36538
241	6.33589	20.5499	3.2625
242	12.4275	13.3743	3.65485
243	8.55583	17.2156	3.76269
244	10.3192	19.4298	3.47484
245	12.323	14.6102	3.29705
246	19.6204	13.144	3.27503
247	13.6629	16.1135	3.02709
248	17.4049	14.8461	4.09289
249	14.6678	21.0069	3.76493
250	16.6045	14.0556	3.92387
251	19.6319	21.0337	3.31213
252	10.4579	13.5797	3.74861
253	13.4977	26.3144	3.66049
254	21.0434	21.9472	3.22539
255	15.5505	15.578	3.50815
256	10.8841	11.6452	3.14053
257	18.4722	14.1225	3.30156
258	14.8857	22.8042	3.29746
259	17.2844	18.8021	3.29506
260	20.2382	17.7905	3.68649
261	21.9496	10.0474	3.59756
262	18.0381	13.0086	3.47137
263	12.6111	12.0961	3.66905
264	10.5917	12.698	3.36001
265	16.019	16.0227	3.78094
266	16.8424	10.1925	3.14715
267	12.7214	16.3233	3.32188
268	22.3566	13.301	3.47065
269	11.2676	12.796	3.07871
270	16.7529	17.6985	3.64443
271	10.2342	18.5535	2.76093
272	19.7619	15.2555	3.51381
273	11.5688	15.8949	3.21763
274	15.5456	12.4201	4.20045
275	19.727	14.7155	3.50394
276	17.121	13.0097	3.32708
277	18.7	17.4358	3.16026
278	13.4478	14.2486	3.40487
279	19.0829	17.4618	3.2743
280	17.234	7.20209	3.4967
281	18.5004	22.9894	3.34164
282	16.1674	14.792	3.89673
283	14.2168	19.3547	4.25341
284	20.5107	20.2247	2.94726
285	18.1097	17.5668	2.91297
286	15.0415	11.9844	3.80395
287	15.183	17.4202	3.89327
288	17.6752	8.54007	3.4755
289	9.27979	13.9667	4.01656
290	19.2814	8.34288	3.16118
291	12.7732	23.5045	3.42274
292	13.6045	20.333	3.62431
293	19.7863	14.4469	4.20575
294	19.9894	26.825	3.89918
295	16.2412	26.2462	3.50102
296	13.1309	8.2494	3.45146
297	19.8024	19.1267	3.44667
298	14.6482	12.7512	2.71594
299	19.6063	15.8958	3.46874
300	14.8943	13.3283	3.46283
301	11.9153	11.0587	3.51601
302	13.0737	8.41674	2.96262
303	9.312	17.7916	3.46238
304	15.5105	18.5333	3.34721
305	12.4252	15.5054	4.14809
306	16.2873	17.2726	3.66669
307	23.3189	13.2535	2.9457
308	21.6112	10.0739	3.60414
309	23.9093	10.9389	3.71172
310	19.791	21.069	3.32777
311	17.7767	11.4303	3.54801
312	21.8675	15.8888	3.79076
313	23.9794	13.5847	3.40175
314	21.0533	6.78991	3.50878
315	24.1593	10.8603	3.31853
316	14.6231	18.6079	3.23368
317	25.8627	19.2218	3.10013
318	26.1259	11.3119	3.02272
319	20.2026	15.6016	3.4439
320	12.4727	12.9516	3.08956
321	16.6022	13.5786	4.23457
322	20.75	13.805	3.23367
323	12.6276	18.1146	3.43535
324	10.9594	16.2414	3.99102
325	12.3147	11.1749	3.72066
326	17.7583	19.1925	3.39034
327	11.8259	14.7496	3.27393
328	14.6958	13.482	4.18751
329	18.1289	15.7517	3.11726
330	18.0234	15.4171	3.72472
331	17.0168	18.133	3.73425
332	19.7627	13.6815	3.74702
333	17.8686	15.0534	3.47648
334	7.72951	18.8891	3.30333
335	16.7159	21.28	3.32555
336	14.1548	20.2851	3.10355
337	9.16366	21.9698	3.72184
338	16.8371	11.8483	3.7883
339	15.493	24.9872	3.53583
340	24.2258	17.1542	3.11278
341	18.7853	18.7225	3.66321
342	10.7849	6.3581	3.48946
343	17.3424	14.0501	3.46834
344	18.3244	20.7127	3.24952
345	19.2989	14.1151	3.3432
346	13.554	20.1337	4.188
347	8.85088	21.5135	3.75503
348	21.4649	18.6836	3.80187
349	14.4905	18.9265	3.45957
350	19.4411	16.1267	2.58219
351	12.5387	14.9486	4.64103
352	13.0599	10.5044	3.09364
353	16.7291	11.3561	4.2286
354	18.2204	10.7975	2.77924
355	15.5446	17.4947	3.41722
356	17.53	12.4852	3.66093
357	7.84165	13.6426	3.60838
358	21.6722	18.8395	3.18138
359	10.4117	16.3456	3.59471
360	13.7948	14.9879	4.24259
361	10.2419	21.8843	3.42582
362	17.1665	11.5803	3.3009
363	15.249	17.2018	3.21332
364	17.8526	15.2598	3.4457
365	21.5174	19.2312	3.81218
366	12.7259	18.0298	3.21811
367	23.3427	17.5995	3.75689
368	22.0008	19.0542	3.89392
369	15.3335	17.8904	3.45778
370	21.3951	15.8395	4.80653
371	18.0841	12.0691	4.09643
372	16.6439	9.15673	3.25781
373	25.1294	12.9699	3.37475
374	20.411	14.1122	3.10321
375	21.803	12.0255	3.47141
376	12.4242	11.0965	3.50504
377	16.7488	16.7823	3.35764
378	20.0587	14.5731	3.91774
379	23.746	8.68574	3.53072
380	22.5098	21.6965	3.05392
381	21.026	19.7639	3.86008
382	18.7711	14.3175	3.60206
383	16.3828	20.1993	3.28143
384	17.8008	14.7352	3.44591
385	13.0928	21.6314	3.42376
386	10.4544	18.1762	3.32367
387	19.2638	19.3638	3.85331
388	16.5524	21.6221	3.31693
389	15.5614	17.3968	4.08125
390	23.8655	15.6197	3.51277
391	13.2408	20.0525	3.93998
392	17.2575	19.2232	3.19527
393	21.2302	17.2676	3.7311
394	10.3767	14.5614	3.65683
395	22.2351	11.3196	3.49717
396	17.4685	21.8357	2.69061
397	17.3947	18.8714	3.30385
398	14.6754	15.9276	3.4399
399	23.5571	18.0322	3.68413
400	15.7406	20.6632	3.46515
401	11.5047	12.637	3.0243
402	20.0036	13.4939	3.37941
403	22.7539	10.9666	4.05809
404	17.7173	13.2815	4.17302
405	21.2869	6.80616	3.64039
406	15.2813	16.9779	4.05084
407	18.1535	16.0715	3.98878
408	9.50275	16.6899	3.99009
409	15.3101	11.1768	3.82597
410	22.0081	20.0888	3.8066
411	13.7888	19.5994	3.44373
412	13.0133	17.3071	4.15959
413	14.5529	19.0084	3.50369
414	8.66457	15.3451	3.39731
415	18.468	19.0348	3.78126
416	13.8181	7.62688	3.87274
417	13.8389	25.1542	3.4968
418	23.5215	20.4338	3.71948
419	9.00321	13.0043	2.86215
420	19.559	14.2565	3.11692
421	8.70084	12.8739	3.53518
422	20.3389	9.13889	3.39434
423	19.8858	17.3855	2.76014
424	14.4793	21.8974	3.62618
425	12.2101	6.30817	3.70782
426	20.2507	13.1192	3.97037
427	16.8282	13.3569	2.9843
428	19.9683	14.0367	3.50844
429	17.6531	12.7992	2.85611
430	13.8812	11.0419	3.19836
431	17.7443	18.7608	3.4466
432	15.757	8.86628	3.20965
433	19.255	19.5502	3.39806
434	11.8874	16.6066	3.53019
435	17.637	17.9383	3.63123
436	17.1433	13.5211	3.32398
437	17.7006	14.9177	3.49084
438	17.706	18.3069	3.35933
439	12.6548	15.5026	3.28294
440	13.7723	27.9823	3.63248
441	15.4091	16.2999	3.37389
442	28.0321	11.4725	3.77411
443	14.2783	19.7859	2.79351
444	16.8276	14.2557	3.71589
445	12.3997	22.1976	4.06145
446	8.8036	16.0423	4.46551
447	15.9548	16.7172	3.87367
448	16.0077	13.5429	3.48551
449	21.1357	18.1637	3.89278
450	12.9499	7.94414	3.20871
451	14.5051	10.8191	3.41216
452	21.2349	16.2956	3.1192
453	15.9901	19.7106	3.62029
454	15.5872	17.2476	3.55803
455	18.7077	17.1685	4.05105
456	9.66368	13.6248	3.44442
457	17.1643	14.3387	4.14793
458	23.3407	11.0152	3.44956
459	16.2398	18.2645	3.05471
460	22.6236	12.6375	4.02012
461	10.2444	17.433	3.42027
462	17.822	19.9592	3.05437
463	11.3157	15.5615	3.38633
464	11.5082	14.7891	3.77144
465	13.2183	22.3868	3.17454
466	12.9036	15.0011	3.20689
467	18.3584	13.4336	3.78685
468	19.9361	16.9101	3.73597
469	23.572	13.2795	3.06459
470	12.4413	25.0389	3.34228
471	22.3517	15.7058	3.07898
472	18.5544	19.3055	3.36205
473	15.1294	22.2285	3.33507
474	11.4438	11.9587	3.11517
475	18.2869	14.7152	3.69734
476	20.2709	17.8216	3.59063
477	18.0576	23.896	3.5015
478	16.5874	11.0747	3.83383
479	22.3725	17.9432	3.50871
480	13.659	15.0007	3.68785
481	23.5429	23.5473	3.46935
482	16.7117	10.8715	3.52728
483	16.3538	16.8055	3.65733
484	22.3146	21.4957	3.89575
485	17.9148	11.2647	3.92072
486	22.3961	20.6018	3.43917
487	15.2143	19.4666	3.09033
488	5.61907	18.2822	3.75897
489	17.6883	23.3245	3.01807
490	13.2406	17.1585	3.71568
491	16.5263	13.211	3.87008
492	9.7473	20.3916	3.23313
493	13.823	13.8931	3.45994
494	13.7532	28.2755	4.12507
495	16.8362	18.1481	3.92406
496	22.5646	11.4628	3.33891
497	16.3582	24.5597	3.55546
498	20.5709	15.4499	3.75006
499	11.5822	18.268	3.04575
500	11.5788	15.1824	3.47331
501	21.7494	9.28519	2.81696
502	18.7044	17.7238	3.54305
503	15.1807	19.9335	4.45534
504	17.559	15.4016	4.18986
505	15.8642	24.4259	3.47167
506	21.4749	15.4861	3.79192
507	15.3629	13.644	3.57166
508	14.9525	15.4379	3.80774
509	13.3062	16.4021	3.49883
510	10.2718	18.342	3.23078
511	14.21	16.4021	3.78195
512	20.0594	20.3168	3.49633
513	16.7818	13.1003	3.31136
514	16.167	20.8565	3.62194
515	15.0969	14.2192	4.38911
516	21.7762	29.6139	3.47941
517	7.78169	11.1137	3.27009
518	17.6458	11.0242	3.47799
519	16.2749	20.7152	3.95247
520	22.3592	16.6087	3.47875
521	16.4031	11.1695	3.9205
522	18.9651	19.894	3.21287
523	19.2151	14.0134	3.38864
524	13.4654	21.7453	3.29274
525	15.9049	20.4708	3.9438
526	12.2918	18.0224	3.5818
527	15.7287	17.6514	4.43937
528	16.462	16.5518	3.77036
529	14.1523	12.0634	3.80058
530	13.1839	25.2113	3.12066
531	12.9894	16.2024	3.4209
532	21.1104	15.0988	2.73916
533	17.6188	19.1565	3.45018
534	25.2977	12.9701	3.28732
535	16.5084	15.0068	3.20762
536	19.0349	19.3948	4.19748
537	17.7015	24.0397	2.55945
538	18.172	22.5034	3.1212
539	11.7258	15.3731	4.32805
540	16.8363	18.0063	4.41035
541	9.81467	18.15	3.07537
542	26.5164	15.9602	3.16109
543	14.9569	17.6645	3.5962
544	22.06	18.9862	4.25365
545	13.9862	13.4037	3.33501
546	11.3934	18.3632	3.58742
547	22.4443	15.0032	3.71776
548	24.3565	7.32633	3.52941
549	15.2271	16.2858	3.70171
550	15.7356	12.9553	3.2855
551	16.7235	13.7874	3.65371
552	28.3358	10.2833	3.44328
553	21.9673	8.49693	3.87664
554	20.6829	13.9354	4.13615
555	16.6751	6.38266	3.39811
556	13.7972	17.7454	3.4588
557	16.8184	20.9814	4.39039
558	13.8313	8.84193	3.47454
559	20.1674	15.3136	3.90076
560	11.4822	8.06007	3.2397
561	13.0292	14.3047	3.50166
562	15.9084	12.9007	3.42472
563	26.0845	15.9822	3.51779
564	15.5584	11.4947	3.62653
565	15.7566	14.063	3.43833
566	19.8451	17.1877	2.73771
567	21.2138	16.6204	3.06287
568	6.55439	19.9039	2.95648
569	19.0169	14.1797	3.56014
570	18.4027	21.2028	3.2487
571	25.4139	16.5158	3.81955
572	19.8338	22.1633	3.43443
573	16.3605	13.9524	3.50062
574	24.1056	14.7047	3.06613
575	18.6824	12.1926	3.33206
576	17.1215	13.2883	3.93897
577	9.97722	15.5677	3.0642
578	18.9394	8.1381	3.3959
579	12.8632	15.8624	3.66038
580	17.889	16.8064	3.22843
581	7.83985	13.5773	3.26848
582	11.1908	9.03862	3.3346
583	10.7454	15.0569	3.79959
584	13.6469	14.685	3.36871
585	18.4478	9.85904	3.61153
586	20.2715	16.4377	3.97469
587	23.2497	26.6789	3.71107
588	17.7231	18.778	4.10108
589	21.2574	14.3768	3.95697
590	14.0299	22.9008	2.97672
591	13.279	13.6609	3.80299
592	20.1069	17.7161	3.4918
593	10.4247	23.13	3.28358
594	18.7992	18.2207	3.49977
595	17.2486	14.2225	3.26665
596	13.9285	12.4046	3.4969
597	19.1684	19.6644	3.00443
598	20.0226	16.5454	3.23795
599	9.42122	15.2175	2.91907
600	16.1649	17.5675	4.44917
601	17.7938	17.6585	3.70203
602	11.9117	17.9953	2.75329
603	6.92781	13.8451	3.88155
604	17.3292	18.6979	3.30262
605	20.6134	15.3948	3.68776
606	18.8847	12.4043	3.5322
607	21.5549	15.0293	3.30205
608	19.0978	16.1869	3.98271
609	19.3113	13.2803	3.29427
610	15.8402	11.6073	4.2973
611	14.6476	13.5177	3.67595
612	14.4183	13.1888	3.83024
613	14.3732	14.9183	2.88584
614	15.2096	14.2597	2.95824
615	20.4104	14.529	3.6217
616	18.134	16.472	4.15337
617	18.2544	18.958	3.78629
618	21.104	19.6828	2.4512
619	11.0327	27.126	3.16813
620	19.1993	18.4307	4.38732
621	20.1163	14.0585	3.65294
622	22.9979	11.2473	3.97031
623	14.4997	15.3034	3.08992
624	16.055	16.3126	3.2081
625	19.5495	14.123	3.72872
626	12.8892	17.2807	3.3711
627	7.48275	19.7203	3.50957
628	22.5688	12.117	3.86905
629	20.7031	9.28859	3.5327
630	19.3178	23.8739	3.40343
631	18.6765	13.2324	3.39217
632	7.89306	14.5575	3.46958
633	11.7857	13.4995	2.7871
634	14.4428	18.1083	3.46778
635	14.7569	15.7459	4.1672
636	15.2606	19.0395	3.85399
637	15.8191	8.00866	3.81723
638	23.1527	20.0561	3.91651
639	16.7443	16.285	3.89988
640	15.0884	16.7289	3.77832
641	11.2861	11.9243	3.42467
642	16.8616	15.4935	3.37105
643	15.4175	16.4254	3.60446
644	16.7635	18.1849	3.48234
645	17.3606	20.6063	3.12753
646	23.3887	8.18262	4.48329
647	13.6286	14.7791	3.51398
648	11.4541	17.751	4.1634
649	18.7102	15.8362	4.031
650	12.7298	14.7428	3.2586
651	11.0636	18.6308	3.66174
652	10.8766	11.7671	3.8364
653	18.4321	18.9718	3.39509
654	22.9926	16.6533	3.38468
655	18.4024	9.96172	3.24625
656	10.4281	19.36	3.11075
657	9.62231	10.3808	3.44035
658	12.5814	14.4572	4.26575
659	16.19	16.2397	2.97308
660	20.2775	18.2766	3.9415
661	10.427	10.8571	3.85899
662	14.7626	17.0959	4.12912
663	14.7361	13.3845	3.43213
664	18.5699	10.8703	3.16436
665	11.9071	19.3664	3.10599
666	15.2903	12.6443	3.52114
667	8.89971	19.2012	2.45018
668	18.6754	16.6094	3.23298
669	18.3197	6.80238	4.03203
670	15.2294	7.80526	3.60372
671	12.9535	19.0462	3.36019
672	16.2419	16.0553	3.18381
673	9.67685	17.7428	3.01485
674	12.8661	13.1123	3.48116
675	16.468	25.3027	3.29699
676	18.8845	14.9411	3.45965
677	12.1152	16.3495	3.67614
678	16.8026	22.1045	3.56926
679	6.84901	18.4797	3.80617
680	18.5968	19.972	2.98084
681	17.9413	19.9549	3.64969
682	9.0649	18.706	3.61269
683	8.45838	24.0275	4.25354
684	12.7715	18.7889	3.61875
685	20.6099	16.3798	3.15312
686	28.695	8.06908	4.30569
687	21.0871	15.1246	3.46786
688	18.2563	15.2522	4.64371
689	21.1275	17.733	4.32668
690	21.218	13.6432	3.3403
691	25.6779	13.4449	3.87022
692	15.4555	13.5755	3.87911
693	20.8289	24.9801	2.98827
694	14.5383	14.6282	3.40557
695	17.813	18.273	3.53303
696	15.1887	25.2231	3.94397
697	16.2591	16.2674	3.63503
698	17.435	17.9437	3.13794
699	13.1645	21.0802	3.83844
700	23.3449	19.2053	3.74833
701	20.8094	14.2871	3.11989
702	19.6048	18.178	3.20224
703	17.002	13.3808	3.06061
704	26.6516	15.271	3.99711
705	15.58	11.469	4.05346
706	18.5806	22.8173	3.30515
707	18.96	12.9011	3.57748
708	14.6566	9.13948	4.12746
709	15.5677	15.7755	3.69968
710	20.828	20.1245	3.24737
711	18.8263	16.1334	3.83053
712	13.8514	10.1773	2.83108
713	14.2503	11.1266	3.55328
714	18.0482	10.5574	2.85743
715	25.7311	14.1563	4.29844
716	16.349	27.1546	3.63197
717	17.7741	18.4216	3.06023
718	21.2972	14.3304	3.19544
719	16.2986	18.5739	3.0658
720	11.3612	17.7554	3.50517
721	24.6901	15.5994	4.39388
722	15.8979	19.2286	3.382
723	18.5204	19.8626	3.61459
724	12.534	17.2589	4.08354
725	15.741	16.0883	3.40737
726	15.4318	11.2641	3.16093
727	10.7828	18.55	2.8563
728	10.8785	29.5875	3.28025
729	24.1738	9.20829	3.00837
730	11.1387	13.9888	3.38561
731	24.3767	15.9651	3.22694
732	17.9268	23.6023	3.56808
733	14.4172	9.65208	3.58628
734	19.9459	17.8264	3.1234
735	11.0639	14.3977	3.51599
736	22.2427	15.4424	3.61875
737	5.71618	11.5566	3.51262
738	12.3825	19.1761	3.81699
739	11.7733	11.3055	3.31592
740	21.6871	12.0107	3.19452
741	18.5482	17.7721	3.3291
742	17.7051	17.2988	3.51118
743	21.8098	9.18018	3.99802
744	21.4102	17.2032	3.55339
745	17.251	26.8245	3.21211
746	12.2827	22.0384	3.52795
747	9.12685	17.8867	3.52759
748	15.7185	15.6683	2.94788
749	15.0593	12.2093	3.32092
750	13.2789	15.11	3.50154
751	11.664	11.3858	3.57917
752	16.1701	15.8637	3.36609
753	13.7411	8.36959	2.83802
754	12.0123	9.75409	2.95592
755	17.9365	19.3054	3.26236
756	17.8189	12.5473	3.40725
757	12.8288	19.5579	3.89548
758	14.0817	18.5288	3.79492
759	15.3055	16.6738	3.32404
760	20.4678	13.1226	2.97795
761	16.0945	20.0191	3.05817
762	12.8766	16.786	3.04826
763	15.1175	14.9664	3.01474
764	12.765	18.086	4.0395
765	15.8542	10.3388	3.32009
766	12.3639	19.578	3.99825
767	16.6234	12.3821	3.91759
768	12.3871	17.7159	2.87089
769	18.9022	11.1337	3.4308
770	22.3011	11.0028	4.09717
771	21.7331	14.3314	3.33638
772	20.441	15.0098	3.42959
773	14.1616	7.34951	3.6331
774	17.0243	11.4928	3.83883
775	12.4614	16.2402	3.44221
776	15.8835	15.3891	3.34573
777	13.6291	19.2094	3.2471
778	21.4682	15.037	2.65349
779	14.5061	17.1423	3.44332
780	16.5025	21.116	3.12318
781	15.8986	7.00552	3.88291
782	20.6197	9.56735	3.33721
783	15.6687	25.6452	3.14353
784	18.2574	9.42728	3.29663
785	17.2994	19.7742	3.72455
786	13.034	17.0126	3.41907
787	22.9649	22.6261	3.61415
788	12.2152	18.7537	3.43585
789	16.554	18.5539	3.55084
790	18.9489	23.7161	3.66477
791	10.2416	15.5554	3.68147
792	16.4165	23.6872	2.73171
793	20.3168	12.9671	3.30818
794	10.0126	18.8233	3.36189
795	16.9216	13.7462	3.26592
796	11.5704	16.9805	2.82885
797	17.0748	14.9171	3.4342
798	18.242	22.0335	4.06745
799	14.5752	8.71408	3.53297
800	19.7687	10.6767	4.01738
801	14.6487	16.5255	3.26973
802	10.7999	14.5611	3.7116
803	7.88461	17.3245	3.48468
804	17.6582	14.0791	3.84471
805	17.7932	16.0965	3.73855
806	15.1224	13.2244	3.64043
807	12.2487	11.6101	3.73069
808	23.8453	18.6187	3.04548
809	13.1047	12.1315	4.14555
810	10.1431	15.4388	3.96992
811	22.6909	16.2693	3.13204
812	19.2841	9.70934	3.15028
813	11.0402	19.5773	3.37469
814	11.9201	11.1257	4.03716
815	15.3077	12.2958	3.64703
816	16.2987	18.3483	3.26373
817	17.9998	20.0542	3.69808
818	14.7776	17.7827	4.30606
819	16.811	13.1699	3.75457
820	13.5655	17.5516	3.32825
821	17.4078	14.1136	3.68987
822	14.2535	18.7965	3.67413
823	16.4246	9.26855	3.01854
824	20.5004	20.1829	3.98652
825	13.3243	22.4183	3.16346
826	9.40901	16.0382	4.10502
827	17.2933	21.2397	3.30208
828	11.4675	25.3688	2.66829
829	7.0893	22.253	3.92866
830	18.9638	11.0385	3.00905
831	20.966	17.411	4.20484
832	23.3149	18.5052	4.00013
833	18.0697	23.631	3.95978
834	9.4618	17.5704	3.66586
835	17.7278	18.0347	3.5793
836	17.9006	23.9107	3.15823
837	19.0349	19.5704	3.88297
838	16.0448	14.8971	3.20302
839	11.6152	14.1781	3.53077
840	17.6785	13.1087	3.09375
841	19.6423	17.3661	3.07562
842	22.5656	20.5309	3.27321
843	19.5588	21.1604	3.63106
844	11.6323	21.5903	3.43025
845	14.3544	16.3315	3.46272
846	16.436	12.3497	3.59538
847	11.6405	14.6619	3.78262
848	13.8203	16.6668	3.87515
849	14.952	12.4739	3.66114
850	21.0097	25.5561	3.65036
851	20.717	15.5222	3.83964
852	10.4053	8.05851	3.50509
853	8.17386	18.6782	3.12615
854	8.25026	13.598	2.96897
855	17.5041	19.2621	3.15971
856	15.7408	10.8351	3.51454
857	6.71351	11.7614	3.18213
858	16.5076	24.0035	3.8979
859	24.0933	13.3767	3.41438
860	10.9799	19.5984	3.17518
861	19.3485	15.5368	3.69501
862	17.8085	15.9869	3.11958
863	20.4415	12.5651	3.87655
864	19.8763	16.8276	3.06476
865	19.2051	22.1889	4.13631
866	22.2673	10.9026	3.55437
867	17.7539	17.4005	2.84535
868	19.0538	21.3852	3.6683
869	17.4464	17.2789	3.7253
870	17.7377	19.7763	4.39044
871	18.7538	21.6074	3.52328
872	14.7162	17.087	3.44112
873	12.4149	23.2398	3.26697
874	14.5345	14.3543	3.89026
875	12.0998	11.3155	3.47228
876	26.5262	22.6391	3.43686
877	12.0699	20.4865	3.76528
878	24.5615	19.8588	3.1819
879	23.5694	8.71424	3.75669
880	5.13013	6.68966	3.50768
881	18.4666	20.5128	3.95372
882	22.9436	17.2994	3.38829
883	13.1305	16.1846	3.11265
884	27.1742	12.5438	2.51291
885	14.777	17.9937	3.49175
886	18.9126	19.3535	4.10405
887	11.7627	19.9243	3.399
888	16.6451	18.2772	3.53475
889	12.449	18.4819	3.49086
890	11.6759	23.8708	3.80943
891	14.0956	9.40943	3.23994
892	20.2995	6.7057	3.8018
893	18.2316	13.9166	3.26849
894	17.8799	19.4159	3.18765
895	10.7374	13.58	3.28349
896	12.1104	13.4258	3.60293
897	21.6682	14.1398	3.85286
898	20.9627	10.9991	3.77782
899	12.9523	13.215	3.17499
900	18.6766	17.8088	3.40584
901	17.2188	21.7133	3.24657
902	13.6286	17.4005	3.89213
903	26.734	16.5348	3.16356
904	24.2876	20.0583	3.74339
905	22.3016	15.528	3.37638
906	7.72682	17.8681	3.43376
907	24.6207	13.3418	3.77685
908	18.1678	12.6204	3.88337
909	13.0535	14.8631	3.69798
910	14.36	18.8793	3.17337
911	16.2202	11.409	3.83472
912	14.2629	17.3745	3.31634
913	18.2102	14.77	3.60164
914	18.9014	22.3534	3.56495
915	18.4195	20.0683	3.56129
916	17.665	8.90853	3.296
917	15.5492	18.0932	4.46544
918	26.2193	10.6698	3.23225
919	16.4833	16.4228	3.44398
920	16.2714	17.9066	3.44934
921	18.3487	16.7433	3.1288
922	19.5916	20.4683	3.81819
923	15.5601	18.454	4.13329
924	18.0556	19.3117	3.13642
925	12.4878	18.1349	3.55635
926	11.6521	19.1829	3.58008
927	11.7713	9.36682	2.69846
928	20.6851	19.5418	2.9776
929	14.143	15.7973	3.45311
930	13.9731	17.3753	3.84801
931	17.9852	18.4641	3.50438
932	21.5376	24.3173	3.43358
933	16.5483	23.2475	3.72181
934	16.1617	19.8464	3.92773
935	16.7782	17.6104	3.60357
936	17.4142	16.269	3.33024
937	17.573	9.17573	3.93196
938	11.6203	10.9993	3.59932
939	22.2494	16.4044	3.49627
940	22.2946	13.8393	3.3653
941	5.28928	12.5147	3.18154
942	11.2601	8.32772	3.29912
943	21.0313	10.1568	3.42198
944	15.3089	13.8428	3.46213
945	10.8046	15.9027	3.57434
946	11.1883	14.7494	3.88718
947	22.9398	14.0908	3.9778
948	23.1103	14.9204	3.74778
949	14.3303	14.8429	4.42527
950	11.8702	11.1396	3.94327
951	20.7851	14.4214	3.35943
952	19.3188	13.6559	4.0215
953	23.5099	18.7829	2.90135
954	18.0752	14.8988	3.57739
955	23.3748	12.3017	3.0034
956	16.4017	21.103	3.61637
957	17.1921	16.2816	3.49906
958	17.0711	19.3975	4.23524
959	9.60147	17.4957	3.23066
960	17.323	20.9218	3.66403
961	10.6301	17.6585	3.75412
962	19.4016	9.38922	3.22297
963	18.9195	13.2745	3.32095
964	8.77054	9.16179	4.09639
965	14.6698	14.8282	3.76683
966	17.5913	17.158	2.83394
967	18.3455	12.2657	3.92167
968	17.0228	15.6686	3.57623
969	18.3708	20.0503	3.65801
970	16.0206	18.7738	3.46088
971	16.0567	14.4327	3.07362
972	23.0311	15.8874	3.9493
973	20.5742	17.9168	4.07344
974	20.0815	23.3945	4.14583
975	15.0329	10.3388	3.34259
976	22.6184	15.7097	3.89292
977	22.3226	12.0609	3.76124
978	22.586	16.7974	3.67465
979	27.939	17.1517	3.33017
980	12.3288	20.5262	3.24207
981	12.2216	21.8017	2.82966
982	19.0329	30.4188	3.94418
983	23.4011	20.5223	3.21377
984	16.4396	16.7847	3.66053
985	19.072	16.5069	3.84131
986	20.3689	11.6231	3.6235
987	16.592	16.4003	3.67029
988	11.8004	14.2098	3.91936
989	13.172	14.8992	3.90312
990	17.2905	6.54711	3.56513
991	11.5893	9.54924	3.62281
992	16.16	17.0317	3.26809
993	15.5534	15.4801	3.61416
994	14.5236	14.7585	2.9934
995	10.8281	13.2855	3.39532
996	19.1481	23.9139	3.62949
997	21.7448	9.9714	3.3964
998	21.3839	24.3521	3.67717
999	15.6126	20.7308	4.01405
1000	13.2206	22.172	3.0247
1001	12.2177	22.0468	3.74832
1002	12.4014	17.5414	3.50493
1003	28.0456	18.0841	3.38614
1004	18.583	19.7598	3.42583
1005	26.0675	21.4322	3.1825
1006	15.4121	26.2764	3.29099
1007	11.0477	18.6202	4.03047
1008	20.1754	22.6586	3.39308
1009	21.2507	18.4142	3.06748
1010	10.6765	11.9819	3.43437
1011	27.1779	21.4114	3.76575
1012	12.2016	24.3633	3.62746
1013	20.789	14.7319	4.07333
1014	18.9994	22.2546	3.34865
1015	21.1143	13.149	3.43204
1016	14.7345	17.6643	3.57709
1017	17.4354	11.2274	3.51516
1018	14.5684	20.1561	2.95947
1019	23.9571	19.0583	3.3585
1020	13.205	19.2548	3.68301
1021	18.4269	14.9575	3.87635
1022	17.9363	20.06	3.16255
1023	11.2774	16.8776	3.64762
1024	18.375	12.0457	4.02641
1025	11.1209	14.1659	4.25512
1026	11.6208	12.637	3.82367
1027	14.6048	15.5724	3.14284
1028	14.2281	15.0726	3.51813
1029	12.5614	13.8998	3.1998
1030	19.0464	15.2542	2.87125
1031	18.8942	19.3267	3.79839
1032	18.903	12.3313	4.02537
1033	15.9334	21.0618	3.45324
1034	14.134	17.2189	3.59949
1035	18.0906	26.3261	4.08831
1036	19.0401	15.4633	2.94055
1037	8.81394	17.9463	4.04418
1038	20.7851	19.2802	3.56614
1039	13.3615	15.1849	3.47563
1040	9.35131	15.3059	3.88098
1041	13.8584	10.0263	3.08984
1042	17.5993	9.79705	3.59595
1043	25.4882	14.9655	3.59968
1044	12.6583	12.2958	3.83846
1045	14.8628	17.3163	4.14361
1046	17.5764	15.0916	3.24269
1047	18.4597	12.6651	3.30002
1048	15.8742	12.5321	3.22127
1049	16.4206	20.7962	3.05938
1050	14.833	12.1614	3.5671
1051	17.104	19.7373	3.77752
1052	14.6435	14.0612	3.22506
1053	12.2547	15.8936	3.882
1054	21.4268	13.6306	4.32815
1055	19.9986	13.6427	3.30936
1056	13.1833	24.0579	3.37697
1057	18.7795	20.7106	3.80261
1058	21.6255	16.0429	3.43187
1059	10.7263	13.5833	3.2859
1060	11.8173	14.314	3.31626
1061	29.0773	13.1284	3.18948
1062	14.3245	26.2868	3.60332
1063	18.797	20.3948	3.49749
1064	22.5077	16.7847	3.86316
1065	18.7508	11.6329	3.36996
1066	7.35547	6.35897	3.72383
1067	16.0911	24.2061	3.67466
1068	16.6789	10.3975	2.91983
1069	14.5755	8.24712	3.22305
1070	20.5025	11.7081	3.27276
1071	14.7351	15.5869	3.32364
1072	18.3953	11.9202	4.12162
1073	25.7638	19.9696	3.39459
1074	18.0986	16.8827	3.12154
1075	9.28087	26.5851	3.69159
1076	19.0836	12.3861	2.70334
1077	9.49708	16.1258	3.18284
1078	10.0921	14.7806	2.92288
1079	25.6464	24.2982	3.15049
1080	19.567	14.7598	3.33849
1081	14.061	10.9543	3.23667
1082	10.6535	17.9075	2.9143
1083	15.1332	14.6067	3.78275
1084	23.094	18.2049	3.72754
1085	9.89787	17.3897	4.15631
1086	7.0067	13.9853	3.46499
1087	19.1851	15.4248	4.04036
1088	11.3144	23.8487	3.32943
1089	29.2198	14.8136	3.62526
1090	19.8606	16.8874	4.01207
1091	16.4657	15.8443	3.56422
1092	19.1528	14.0185	3.22784
1093	18.6584	21.3649	3.46437
1094	14.9668	14.1683	3.82953
1095	25.7201	12.7807	3.39268
1096	20.6787	10.0558	3.55816
1097	19.5274	13.4179	2.96983
1098	17.5083	11.0175	3.86434
1099	17.1948	14.0085	3.42275
1100	16.9585	13.6004	3.61468
1101	12.5671	22.7669	3.17056
1102	9.80525	8.39983	3.91559
1103	6.58994	8.82543	3.82498
1104	17.5465	12.383	3.43985
1105	21.0658	13.9114	3.46889
1106	15.9229	9.25602	2.94883
1107	14.2329	12.6271	3.93293
1108	13.1018	16.5749	3.47285
1109	14.2358	9.52349	3.74933
1110	21.6068	17.8731	3.27388
1111	15.4052	17.3296	3.41953
1112	13.6538	13.1447	3.6039
1113	20.5217	15.4485	3.46677
1114	19.9216	16.5828	3.53494
1115	16.8063	12.9964	3.19404
1116	16.5577	14.7155	3.3981
1117	19.0613	19.332	3.29593
1118	20.1727	18.9036	2.87901
1119	16.9487	12.9325	3.91865
1120	14.474	13.2274	3.50584
1121	21.6994	16.0209	2.99605
1122	8.83218	19.7704	3.24988
1123	17.8065	19.3095	3.90648
1124	16.6559	24.5072	3.50718
1125	17.3538	10.4291	2.9377
1126	17.5768	15.304	3.08215
1127	12.2899	12.6481	3.81803
1128	15.5544	20.5982	3.83488
1129	16.1858	18.3186	3.18764
1130	12.8311	14.3421	3.98798
1131	7.9902	21.2308	4.54629
1132	13.7039	17.8908	4.09208
1133	23.9955	13.5526	3.98722
1134	14.2346	11.9774	3.85134
1135	21.2269	14.3683	3.28808
1136	20.2867	17.4768	4.3719
1137	18.9053	11.001	4.15245
1138	13.2741	20.6002	3.32493
1139	20.5013	23.6933	4.40464
1140	12.0843	20.5118	3.37821
1141	15.6612	12.5682	3.69462
1142	19.0974	9.29376	3.33876
1143	16.5312	15.6818	3.3543
1144	22.4223	23.1515	3.7808
1145	22.8627	13.6699	3.38727
1146	17.9654	12.4556	4.09475
1147	10.6094	10.8119	4.003
1148	16.5287	9.33879	3.44698
1149	16.0379	21.9038	4.01863
1150	22.5488	14.2732	3.24049
1151	20.3541	22.6558	3.47445
1152	20.0764	8.99658	3.62615
1153	12.3803	17.3819	3.78679
1154	22.1748	15.6808	3.40427
1155	17.1082	20.5101	2.64816
1156	24.5236	19.6414	3.34994
1157	5.29779	23.7074	3.08015
1158	19.1514	10.3435	2.84962
1159	20.8212	7.75101	2.98751
1160	18.0321	22.9531	3.32707
1161	18.6185	21.0502	3.32249
1162	10.4047	8.70246	3.98611
1163	24.4813	12.7916	3.29238
1164	11.9267	19.5114	3.2754
1165	26.6568	11.4137	3.4752
1166	13.3834	15.7206	3.61215
1167	16.099	17.885	2.99726
1168	13.8952	16.2815	3.37316
1169	15.3692	18.0385	3.48537
1170	13.059	13.1303	3.89794
1171	18.8374	19.8188	3.97634
1172	30.9121	17.4541	4.09536
1173	19.6669	31.0901	3.0989
1174	14.4823	15.0644	3.71314
1175	21.6937	18.9718	3.32994
1176	18.743	15.4361	3.54817
1177	16.0893	11.2865	3.58534
1178	21.1118	6.13512	3.2767
1179	12.3719	18.2896	3.73765
1180	15.3887	13.1458	3.00622
1181	17.9312	26.3372	4.08291
1182	10.8386	8.80106	3.50135
1183	11.6667	17.7327	2.94386
1184	16.5678	14.1475	3.42658
1185	19.1345	12.4467	3.27793
1186	17.3241	6.06147	3.32786
1187	15.4314	14.9269	3.93086
1188	17.3484	15.2599	4.15758
1189	14.7569	13.9994	3.74251
1190	16.2459	11.3067	2.60955
1191	17.475	20.1253	3.58892
1192	16.124	15.0984	3.80959
1193	13.4101	12.709	2.62617
1194	16.0762	15.8789	3.81729
1195	16.1821	12.051	3.03554
1196	18.5161	12.668	3.83504
1197	18.0574	15.2399	4.21679
1198	17.6195	19.2964	3.7014
1199	15.578	11.4209	3.57574
1200	24.5016	7.29268	3.25663
1201	19.6849	15.1624	3.60653
1202	17.8801	18.2892	3.65672
1203	8.57192	16.2595	3.43346
1204	13.2765	16.4609	3.42815
1205	18.4722	13.1826	3.15993
1206	15.396	17.2685	3.94924
1207	11.7694	17.4021	3.68339
1208	17.2462	27.2752	3.649
1209	13.6189	15.1918	3.67656
1210	18.5546	12.4995	3.48593
1211	21.2787	18.3457	3.52007
1212	18.4007	17.3364	3.57645
1213	17.3238	25.5658	3.46328
1214	9.7519	17.4465	3.29019
1215	11.17	18.2858	2.70401
1216	15.6872	13.1846	3.59089
1217	15.1113	19.2326	3.15766
1218	13.7729	17.9619	4.33894
1219	13.6261	12.6454	3.2843
1220	20.0199	16.1109	3.59071
1221	22.4021	13.2261	4.25735
1222	17.1842	15.1882	3.51269
1223	29.4008	20.649	3.64721
1224	21.3955	15.4553	4.12888
1225	25.4443	13.635	3.97157
1226	16.9579	10.0153	3.56191
1227	17.8712	15.1117	3.32088
1228	14.2459	17.4422	3.8021
1229	13.1769	11.0847	3.52305
1230	10.7332	21.4069	3.55779
1231	14.395	9.17209	2.96264
1232	21.2114	11.401	3.39948
1233	18.2958	21.5304	4.07388
1234	18.3576	15.4618	3.69329
1235	22.9718	21.1329	3.42767
1236	14.2408	11.8163	3.49207
1237	11.4241	21.4324	3.66858
1238	16.5514	13.3651	3.92366
1239	15.2317	18.9848	3.50028
1240	17.3996	19.3795	3.12497
1241	18.669	12.3879	3.3254
1242	14.0284	15.9644	3.25026
1243	21.7487	9.66692	3.77917
1244	19.3806	9.58664	3.63565
1245	21.5445	16.1445	3.53301
1246	27.7324	8.8215	3.34405
1247	14.0882	17.4457	3.52471
1248	23.3797	20.5538	4.17056
1249	19.4934	9.19329	3.19546
1250	21.9334	14.1593	3.19714
1251	8.3468	8.78216	2.97134
1252	18.0418	14.8562	2.91603
1253	19.5309	23.2612	3.69783
1254	20.9756	26.6035	3.69092
1255	14.8083	16.8041	3.8427
1256	11.7156	15.827	3.76582
1257	17.2991	16.1409	3.54517
1258	12.4073	10.8714	3.52104
1259	18.9693	18.4999	3.50611
1260	17.55	14.5545	3.02599
1261	13.3339	11.5446	3.46326
1262	18.6233	17.2746	3.76011
1263	17.8229	22.6115	3.99757
1264	10.6261	15.3679	4.00637
1265	16.5437	8.63353	3.55802
1266	23.3417	22.159	3.47595
1267	16.9304	18.2502	3.68599
1268	11.8452	21.9869	3.55812
1269	15.8379	14.4537	3.89972
1270	21.2468	15.3086	3.66279
1271	12.2293	22.5662	3.46416
1272	14.4187	18.1672	2.61779
1273	14.1585	21.0314	4.34659
1274	16.0811	14.5321	3.44097
1275	22.2186	13.6076	3.16094
1276	12.1011	20.9793	3.14029
1277	17.8431	13.478	3.20556
1278	22.9352	13.5929	3.40248
1279	17.5375	13.6141	3.77619
1280	15.3503	23.4224	3.35891
1281	17.5701	16.5532	3.61203
1282	23.1454	15.0495	3.36345
1283	16.3152	9.6344	4.03456
1284	14.4727	18.3651	3.09151
1285	18.5004	18.7522	3.61016
1286	11.9335	22.8746	3.23654
1287	16.4461	19.6193	3.28838
1288	16.4635	11.9789	3.4164
1289	15.6989	16.4269	3.6938
1290	9.10562	16.1647	3.25907
1291	18.6379	12.3179	3.74836
1292	18.175	21.6914	3.61988
1293	18.1478	9.33111	3.4037
1294	24.8721	14.9135	3.33665
1295	26.178	15.7012	2.99621
1296	21.1901	12.5916	3.39086
1297	18.9769	16.5926	3.53063
1298	15.64	13.602	3.75265
1299	12.951	11.4154	3.89788
1300	25.1809	14.3036	3.218
1301	12.9187	19.0633	3.67554
1302	17.3222	20.0398	3.04763
1303	13.2115	15.8194	3.42597
1304	14.3318	10.0939	3.66593
1305	19.6991	11.5681	4.02991
1306	11.2891	8.88376	3.50777
1307	16.6679	8.38266	3.3796
1308	16.5309	10.7979	3.51078
1309	12.5527	20.6674	3.86804
1310	14.202	15.9594	3.94354
1311	21.0034	14.2698	3.07315
1312	19.4406	16.6581	3.37375
1313	20.0457	12.8407	3.70393
1314	12.4859	11.4542	3.7999
1315	14.3949	11.775	3.80022
1316	12.8443	17.7329	3.48802
1317	8.30826	15.3183	2.65442
1318	13.2268	19.9323	3.23901
1319	16.7886	16.8271	3.22632
1320	18.2164	18.7243	3.78518
1321	15.1458	16.2737	3.19723
1322	10.362	18.2574	4.05378
1323	10.8872	17.3545	3.49979
1324	15.6471	15.5722	3.05365
1325	14.9855	13.208	3.62804
1326	17.9756	14.5816	3.62858
1327	15.8164	10.4554	3.38285
1328	17.339	14.7889	3.98522
1329	4.79889	9.5659	3.80742
1330	13.7637	20.9042	3.90163
1331	18.0315	17.2475	3.28094
1332	14.3373	17.0924	3.86165
1333	15.4844	10.1355	3.88642
1334	16.2691	20.5405	3.8401
1335	19.954	20.6056	3.35366
1336	18.2364	18.2565	4.14055
1337	17.2647	18.7511	3.33475
1338	17.788	15.4899	3.5571
1339	15.6834	10.1849	3.82088
1340	14.913	10.062	4.3998
1341	17.0641	12.8697	3.04678
1342	23.4428	10.6731	3.40512
1343	13.9757	11.0709	3.57345
1344	10.7157	15.4236	3.89655
1345	20.3334	18.6312	3.69627
1346	24.2795	16.0121	3.59791
1347	13.6555	12.1915	3.085
1348	21.538	15.7252	3.44729
1349	20.3938	11.8987	3.63286
1350	22.6293	10.0614	3.29706
1351	18.3401	13.6402	3.62802
1352	18.842	20.4183	3.70371
1353	21.9121	9.77182	3.31178
1354	17.8922	17.1193	3.63427
1355	18.6667	19.7746	3.21985
1356	16.6259	14.3872	4.06871
1357	14.9714	22.2532	3.9405
1358	16.349	6.73373	3.25439
1359	12.1816	10.7733	3.72615
1360	14.6103	18.2837	3.33176
1361	21.3502	11.4224	3.56881
1362	20.6192	15.9487	3.9689
1363	16.827	22.877	3.42732
1364	19.1507	20.4579	3.72629
1365	27.6813	15.7887	2.99427
1366	15.6345	6.28047	3.37303
1367	9.29186	13.3558	3.19599
1368	15.8207	12.4635	3.73952
1369	12.2111	11.2882	3.42921
1370	13.9539	17.1743	3.68304
1371	14.934	13.9373	4.09948
1372	14.5209	28.3268	4.25746
1373	18.5204	17.273	3.77707
1374	19.0685	17.0847	3.53064
1375	11.0466	8.68634	3.53941
1376	14.9692	17.471	3.05273
1377	17.6739	19.5232	3.63496
1378	16.4057	20.9504	2.76092
1379	7.53268	14.8152	4.05109
1380	15.9484	13.7987	4.1748
1381	9.35833	11.3337	2.95126
1382	13.8753	24.7289	3.05828
1383	14.7854	14.9387	3.74564
1384	13.4554	7.10136	3.44937
1385	20.2136	11.6847	4.62304
1386	13.6442	15.0886	3.1154
1387	17.6118	14.4112	3.50717
1388	20.6516	14.6669	3.6068
1389	9.72874	20.5437	3.39242
1390	19.6079	19.236	3.40506
1391	22.2099	9.88502	3.22235
1392	21.154	15.3541	3.75218
1393	15.9525	8.82244	3.45053
1394	13.7838	23.0298	3.60537
1395	23.2534	18.6067	3.84572
1396	14.1912	12.344	4.14427
1397	10.131	10.1354	3.24207
1398	20.0872	13.7509	3.26127
1399	13.0481	24.1074	3.76264
1400	15.6589	20.0227	2.78103
1401	8.79352	14.6731	3.47157
1402	16.3066	24.5434	2.79931
1403	17.9618	12.7898	4.37365
1404	7.44374	19.4772	3.53587
1405	9.8514	15.7063	3.46473
1406	16.1658	20.6702	3.55225
1407	13.6802	16.5841	3.13276
1408	22.7926	17.1441	3.16867
1409	15.6638	12.64	3.53953
1410	26.5186	18.4428	3.35736
1411	15.7178	11.0383	4.16663
1412	18.7436	16.2923	3.48029
1413	10.7255	14.097	3.53425
1414	19.7072	21.5831	3.06678
1415	24.5518	17.3677	3.91415
1416	17.949	16.9391	3.49851
1417	13.3523	10.0674	3.57902
1418	17.1408	15.568	3.21345
1419	20.3982	15.5041	4.44685
1420	27.3525	21.9489	2.94513
1421	20.1495	13.1897	3.14835
1422	9.71512	20.0492	3.36091
1423	19.3411	15.5971	3.36555
1424	16.9634	12.1456	3.06293
1425	16.2514	15.8929	3.46916
1426	8.65838	10.2429	3.59299
1427	16.1167	18.469	3.1749
1428	12.0981	18.4098	3.25634
1429	21.5988	17.4331	3.81048
1430	17.9824	13.9728	3.61636
1431	22.2095	16.8682	3.70756
1432	23.5244	9.93724	3.63428
1433	23.5599	16.2192	3.51747
1434	25.066	15.9977	3.1487
1435	19.5735	12.4798	4.16391
1436	15.4452	19.6049	3.00358
1437	18.0399	8.8319	2.50894
1438	11.1438	19.7694	3.26457
1439	10.8588	8.55447	3.99033
1440	17.8692	15.372	3.82273
1441	13.9391	6.5377	3.25491
1442	23.0037	12.8266	3.79898
1443	17.3423	15.2274	3.43167
1444	14.2218	14.7414	4.07604
1445	11.679	8.42866	3.6662
1446	21.8905	16.2206	3.21535
1447	12.2488	18.2866	3.30439
1448	16.7282	12.7826	3.68744
1449	16.5294	20.3159	3.60819
1450	14.4179	24.2582	3.591
1451	11.6466	18.9863	3.72404
1452	13.1045	21.738	3.6976
1453	15.6526	25.5777	3.2485
1454	27.1801	20.7219	3.83099
1455	16.4833	14.4469	3.4681
1456	21.2651	10.8614	3.22251
1457	20.709	15.6216	3.19441
1458	14.9204	20.3836	3.43935
1459	18.4075	16.0411	3.89408
1460	6.93745	14.7017	4.01081
1461	5.35172	13.7268	3.73294
1462	10.7637	14.1523	3.55521
1463	15.4654	14.8983	3.4932
1464	8.68951	18.8748	3.03792
1465	16.0711	15.4419	3.59437
1466	14.8559	19.8091	3.36251
1467	14.8397	13.455	3.44592
1468	12.2565	11.9299	2.84304
1469	17.3427	10.744	3.3726
1470	17.331	13.6955	2.67231
1471	15.9903	15.3292	3.3536
1472	9.86382	14.4096	3.5647
1473	16.8151	15.5605	3.43503
1474	19.7358	13.682	2.48115
1475	13.8061	14.5134	3.11898
1476	17.5406	18.3748	3.63764
1477	21.0114	17.1437	3.4641
1478	11.1679	18.4415	3.27015
1479	22.3778	24.4399	3.71346
1480	21.8221	17.6003	2.90328
1481	17.7683	7.0853	4.10892
1482	14.3508	20.6655	3.46317
1483	14.5769	15.8339	3.43657
1484	15.6336	19.3374	3.2992
1485	20.8547	13.2083	2.73887
1486	12.6016	17.7026	3.45095
1487	21.1431	12.1652	3.19022
1488	12.2646	9.04054	3.60106
1489	12.6671	10.9843	3.47571
1490	17.3363	10.3815	2.79457
1491	5.49475	18.2198	3.59636
1492	11.7403	14.9454	3.40447
1493	21.5532	17.4936	2.79957
1494	15.3285	20.7173	4.13076
1495	17.1128	22.0983	3.25601
1496	10.5618	16.3847	3.8756
1497	20.6078	18.044	4.29817
1498	8.37745	11.2135	3.01115
1499	19.5538	11.5774	3.57627
1500	16.644	21.9589	3.72914
1501	11.2	18.5304	3.98707
1502	24.4499	9.21798	4.26119
1503	24.8753	17.2264	3.63445
1504	21.1612	8.0729	3.56588
1505	18.1621	18.9721	3.71676
1506	17.4247	20.7063	3.52076
1507	15.9222	19.0509	3.36877
1508	8.80876	11.0515	4.13559
1509	8.82254	16.5083	2.19936
1510	14.2419	17.6038	4.15547
1511	14.2905	13.769	4.07722
1512	12.4305	20.9309	3.19065
1513	21.2889	12.0284	3.56326
1514	24.2714	14.7805	3.15751
1515	22.6662	15.004	3.52141
1516	16.8721	13.4062	3.11608
1517	24.9027	18.5058	3.13774
1518	15.5627	8.61007	3.02412
1519	15.6455	21.4041	2.99986
1520	19.9895	13.994	3.33354
1521	13.8331	11.3365	3.64288
1522	14.8393	21.0788	3.49128
1523	16.3481	19.9023	3.70316
1524	16.725	12.2827	3.26447
1525	17.1335	19.2711	3.13357
1526	16.1507	12.8297	3.93245
1527	15.4505	16.1563	3.87926
1528	22.7511	12.7557	3.09631
1529	19.2992	16.0377	3.79095
1530	19.9054	16.7066	3.89602
1531	15.1163	17.5775	3.09654
1532	20.5371	24.0349	3.62882
1533	13.4995	19.8325	3.22557
1534	13.7383	14.2527	3.52189
1535	8.58856	14.8686	3.27641
1536	21.2013	13.2961	4.51344
1537	18.9145	15.1936	4.29204
1538	18.725	18.7003	3.20954
1539	14.1614	14.0604	3.0935
1540	7.18294	12.8107	3.49557
1541	21.09	22.8488	3.55195
1542	19.5252	8.64434	3.53712
1543	14.5175	9.54422	3.29337
1544	14.9724	17.3971	3.97921
1545	18.9135	20.9822	4.35224
1546	15.563	20.7099	3.52718
1547	22.1347	15.2323	3.58166
1548	24.5078	9.82344	3.47405
1549	27.1891	19.012	3.7716
1550	16.7404	8.33091	3.17744
1551	23.3768	22.6582	3.06686
1552	13.2212	14.7505	4.1763
1553	20.8476	24.668	3.7273
1554	18.3664	13.0923	3.23663
1555	14.2232	10.7753	3.43885
1556	13.9115	10.3608	2.95923
1557	18.102	22.903	3.46631
1558	14.0428	17.7578	2.76588
1559	20.1992	19.2264	3.88509
1560	19.6731	11.807	4.22723
1561	14.029	18.1173	3.83303
1562	8.97217	17.9396	3.87635
1563	17.093	18.2843	3.22149
1564	20.5154	11.8129	3.21767
1565	17.1742	16.9178	3.68329
1566	15.6846	13.719	3.35244
1567	16.394	13.6857	3.8861
1568	14.1457	15.7494	3.87963
1569	20.2827	13.2088	2.98574
1570	17.3154	16.5326	3.33666
1571	12.2118	10.962	3.58827
1572	13.4529	21.5853	3.70538
1573	21.3141	22.9202	3.4419
1574	15.8341	17.923	3.83006
1575	18.7536	13.7238	3.65671
1576	14.7589	10.0781	3.23051
1577	19.424	9.23906	3.05531
1578	19.9649	18.0381	3.60977
1579	17.1467	18.0915	3.46362
1580	31.0796	18.011	3.50183
1581	17.9952	10.9409	3.47951
1582	19.566	14.7503	3.27653
1583	20.596	21.1153	3.71254
1584	17.8419	15.535	4.31383
1585	14.0097	16.1578	4.20924
1586	23.5388	15.6653	3.82803
1587	18.2209	20.7265	3.08927
1588	24.439	13.2258	3.72787
1589	14.8806	12.6645	3.85055
1590	12.739	10.4602	3.58506
1591	11.0732	20.4241	3.85047
1592	19.1897	13.401	3.56618
1593	23.2617	22.1224	3.31739
1594	9.85365	12.8318	3.62648
1595	14.5605	22.0595	3.2177
1596	16.2873	24.1874	3.64139
1597	14.6768	16.8041	3.42532
1598	9.10677	11.232	3.12543
1599	20.4975	23.1191	3.39171
1600	6.54495	8.19522	2.78474
1601	28.3214	20.3752	3.68465
1602	23.879	8.54828	3.40627
1603	11.0888	19.3671	3.43242
1604	22.37	8.62493	3.67232
1605	20.355	27.152	3.32951
1606	17.7647	11.2791	3.60621
1607	17.678	18.0754	3.29344
1608	13.9707	19.8431	3.54285
1609	16.738	17.787	3.55536
1610	19.5772	22.9753	3.40315
1611	18.4086	31.1809	3.71068
1612	21.1331	13.6246	2.9339
1613	16.7248	17.9315	3.24753
1614	13.455	15.9726	3.24903
1615	4.71559	25.2761	3.46507
1616	13.7576	21.0697	3.84284
1617	20.2671	24.2859	3.76714
1618	15.8363	15.7939	3.35976
1619	14.1344	10.2872	3.8429
1620	17.5795	14.6503	3.41593
1621	13.1303	22.092	2.86306
1622	22.0057	21.7217	3.60456
1623	24.9573	15.2538	3.33548
1624	12.3077	10.5213	3.67067
1625	23.2432	24.1757	2.8014
1626	14.1711	14.1732	4.1112
1627	15.877	13.5823	3.76088
1628	17.8611	13.8244	3.01026
1629	12.7759	13.7799	3.20451
1630	17.596	18.3916	3.9786
1631	14.6344	11.4823	3.35132
1632	11.9573	16.8732	3.49012
1633	13.9152	10.6045	3.51021
1634	16.1108	17.3509	3.34471
1635	12.6706	20.6214	3.29097
1636	11.3335	7.97829	3.93092
1637	19.3677	16.6068	3.38603
1638	23.2912	17.7655	3.56157
1639	14.1539	24.2345	3.47465
1640	20.4471	26.6197	3.722
1641	22.7157	17.1925	3.16836
1642	15.2701	15.2297	3.59344
1643	19.8184	16.1451	3.45461
1644	16.5309	19.9001	3.31168
1645	18.3214	18.3085	3.83062
1646	17.861	12.1418	3.71878
1647	24.575	17.7378	3.72221
1648	10.9814	14.583	3.26268
1649	20.819	15.3466	3.36439
1650	16.4489	12.7283	2.87876
1651	14.0482	7.23318	3.88927
1652	21.9452	12.8147	3.78172
1653	20.0396	22.0554	3.94504
1654	10.4163	17.9612	3.90847
1655	14.072	15.4167	3.94251
1656	15.4397	17.8851	3.44015
1657	20.1395	17.8282	4.22283
1658	15.1447	20.5056	2.80291
1659	17.0522	10.2863	3.48288
1660	20.7044	15.6898	3.43121
1661	13.5911	19.0754	2.95135
1662	19.3609	16.167	3.36727
1663	11.8188	14.2755	3.26741
1664	16.3601	12.4977	3.88465
1665	20.0308	15.5451	3.69238
1666	14.344	13.4402	3.38121
1667	21.8508	16.0569	3.39491
1668	11.4446	8.3508	4.16559
1669	17.1668	16.3453	3.03139
1670	23.5224	15.685	3.23647
1671	19.2862	14.5931	3.2952
1672	17.5971	20.5271	3.68025
1673	20.0535	15.3751	3.27091
1674	16.4472	16.1656	3.88693
1675	15.9914	14.2295	3.79636
1676	18.3083	19.3473	3.27479
1677	17.5283	10.2614	4.20977
1678	13.2439	15.7637	3.15334
1679	17.0445	16.8411	3.3365
1680	11.255	20.8819	3.38449
1681	24.9258	16.8862	3.30495
1682	18.0687	21.6674	3.96945
1683	15.8891	15.7463	3.58261
1684	12.5766	22.1533	3.2197
1685	12.6591	14.7107	3.25006
1686	15.0228	18.2105	3.2298
1687	21.8764	15.9024	3.19408
1688	10.09	18.3995	3.08617
1689	13.2802	18.6148	3.70789
1690	16.2482	18.0491	2.97528
1691	18.2608	8.48149	3.97427
1692	21.4382	15.3735	3.22565
1693	18.3093	9.3386	3.58205
1694	22.3336	23.6858	3.37115
1695	15.5615	18.6115	3.70245
1696	18.0069	14.7945	3.44199
1697	18.0495	10.5132	3.24512
1698	13.5425	18.0101	3.61927
1699	23.7134	21.9482	3.54905
1700	19.5679	19.842	3.70331
1701	13.3269	20.6796	3.18525
1702	18.5555	13.2428	3.98719
1703	17.428	13.8601	2.86501
1704	17.5237	8.65206	3.51309
1705	24.786	21.866	4.36104
1706	13.1809	16.9387	3.9049
1707	20.0567	12.4466	3.55308
1708	13.9569	10.6941	3.57689
1709	17.9224	11.1308	3.4164
1710	13.5456	15.5582	3.00672
1711	12.6933	15.0507	3.43879
1712	21.9363	13.1762	3.9123
1713	13.4305	17.006	3.90521
1714	12.3989	16.9489	3.80765
1715	18.6763	24.1125	3.63349
1716	19.7598	23.2615	3.81836
1717	16.3105	15.7943	2.99561
1718	16.2461	15.5951	3.56116
1719	21.5824	17.5692	3.49139
1720	11.5345	20.8586	3.77752
1721	11.4508	17.6456	2.96426
1722	21.9909	19.8927	3.55181
1723	19.4673	12.9131	3.72706
1724	23.3424	16.7863	3.87157
1725	22.2824	9.83878	3.20305
1726	24.1015	24.5194	3.83501
1727	17.5097	17.1332	3.82638
1728	7.58749	10.1461	3.76245
1729	16.8421	21.0298	3.71601
1730	18.7475	19.8029	3.99265
1731	12.0196	10.475	3.45807
1732	15.5433	18.8736	3.14427
1733	24.4655	12.442	3.32013
1734	17.5826	19.2198	3.76723
1735	10.97	15.5776	3.44407
1736	23.4957	14.7115	3.07086
1737	8.68882	23.2445	3.12709
1738	21.8732	10.4376	3.78663
1739	18.4123	18.6733	3.64581
1740	12.3065	22.5718	3.80815
1741	12.4246	21.4758	2.48411
1742	5.65802	15.613	3.18172
1743	17.0324	14.8447	3.38228
1744	15.4384	19.013	3.45501
1745	16.2475	24.7003	3.63243
1746	14.5775	18.4543	3.71166
1747	11.2468	10.2278	3.89013
1748	11.1311	23.2138	3.71724
1749	27.0011	11.2675	3.50406
1750	11.487	21.2554	3.31884
1751	20.8965	10.305	2.92918
1752	16.9331	12.0748	2.8698
1753	14.5561	22.6478	3.68543
1754	21.2599	16.39	3.41571
1755	22.8205	15.5694	3.81819
1756	16.7478	15.2306	3.47298
1757	14.8328	19.454	2.90361
1758	17.837	14.8161	3.15889
1759	13.746	12.7137	4.02711
1760	18.1013	14.4632	3.53305
1761	14.3502	11.9453	3.69201
1762	21.228	6.41181	3.18548
1763	17.5155	21.4614	4.07369
1764	17.2008	15.2503	3.58762
1765	10.967	17.5924	3.5419
1766	15.6162	19.4277	3.27712
1767	22.2642	8.86011	3.81195
1768	18.1218	6.924	3.25274
1769	20.7916	8.6096	3.36683
1770	18.9581	14.8647	3.56541
1771	12.321	16.9101	4.00864
1772	20.1767	18.9963	3.09075
1773	17.5727	13.1909	3.92836
1774	13.3738	14.1109	4.10006
1775	12.7154	19.0149	3.50208
1776	17.7742	14.348	3.87961
1777	16.7333	10.8071	3.20473
1778	14.3927	16.8134	3.61808
1779	20.6462	17.814	2.94895
1780	18.6509	15.7686	3.17212
1781	10.5015	13.9129	3.5701
1782	9.05739	18.494	4.12243
1783	15.1603	10.1284	3.29698
1784	13.6828	20.5447	3.69915
1785	18.5187	10.148	3.58773
1786	13.9835	16.9343	3.28808
1787	15.8925	23.7827	2.9234
1788	18.5506	13.5546	3.3338
1789	11.9244	11.8983	3.59007
1790	12.547	22.2553	2.79867
1791	21.3983	14.2777	3.44488
1792	15.264	15.2735	3.85331
1793	17.6212	18.9304	4.17252
1794	18.2891	15.1489	3.35552
1795	23.5402	20.3645	3.67062
1796	17.0156	11.1902	4.29603
1797	11.1164	24.1836	3.91345
1798	12.6825	21.6809	3.57602
1799	14.1413	15.1953	3.63508
1800	25.3015	16.7436	3.18343
1801	19.1087	11.3294	3.97725
1802	21.7513	11.5825	3.40957
1803	17.2143	11.5829	3.62841
1804	13.5032	19.8703	3.20611
1805	14.6622	9.43945	3.63987
1806	24.0131	19.6679	3.73929
1807	18.7259	10.7211	3.49487
1808	13.6645	18.9114	3.20854
1809	17.7408	11.5391	3.35862
1810	17.4131	15.3869	3.9951
1811	15.3197	10.6756	4.121
1812	13.43	14.8564	3.01007
1813	8.8449	14.3079	4.12151
1814	21.7213	23.3078	2.96188
1815	21.4064	15.5639	3.27316
1816	21.9555	14.7737	2.58538
1817	15.0227	24.6696	3.30265
1818	14.1724	10.9602	3.9987
1819	20.4853	8.80713	2.87407
1820	20.3754	17.3787	3.15737
1821	11.0219	18.9635	3.60358
1822	9.61068	15.9853	3.49973
1823	18.2278	16.2319	3.39936
1824	11.9385	13.3249	4.02156
1825	16.4723	16.1023	3.23296
1826	9.09898	17.6325	3.52694
1827	25.411	7.67399	3.20764
1828	17.255	10.6577	4.13902
1829	16.896	18.0984	3.65589
1830	20.1766	10.7599	3.70797
1831	15.1254	19.4375	3.98751
1832	15.0065	21.3752	4.20489
1833	15.2293	12.0545	3.67918
1834	20.3296	17.1396	3.455
1835	14.2227	13.5909	3.0887
1836	23.3286	9.30581	3.39659
1837	24.2381	18.8412	4.08874
1838	10.6909	12.8268	3.77091
1839	15.3855	17.5477	2.4511
1840	15.9929	22.8421	3.42423
1841	20.4351	11.0555	3.6536
1842	25.7301	12.8989	3.46257
1843	23.2787	21.7016	3.39972
1844	18.996	17.7826	3.37659
1845	12.7231	8.59306	3.56416
1846	12.2011	19.282	3.54012
1847	17.5158	7.59224	3.53907
1848	15.4641	24.1069	3.16824
1849	16.0761	20.3966	3.19126
1850	24.1081	26.3799	3.98007
1851	14.8311	23.3454	4.09144
1852	16.1927	17.3785	3.25677
1853	18.2432	19.8933	3.38612
1854	22.4958	15.1689	3.23502
1855	20.7679	18.9174	3.47251
1856	20.1354	18.786	3.44252
1857	15.1583	16.8893	3.94658
1858	17.1806	19.3663	3.20602
1859	19.2175	13.8171	3.65949
1860	11.6121	18.2401	3.373
1861	22.183	20.1697	3.5161
1862	16.1498	14.9846	3.96694
1863	16.9487	10.5962	3.42172
1864	13.8891	20.5181	2.37937
1865	16.8015	9.07122	3.27259
1866	17.1289	20.4048	3.41534
1867	17.1468	11.2892	3.79977
1868	16.1112	10.4355	3.46027
1869	12.1768	24.6969	3.91382
1870	17.9805	19.2579	3.9206
1871	11.1662	14.4513	3.08493
1872	9.91076	9.4733	4.13186
1873	13.4317	18.2695	3.45674
1874	12.4793	24.2107	3.56384
1875	9.6353	11.9955	3.46793
1876	16.8592	10.7893	3.23969
1877	19.9171	17.7312	3.59383
1878	15.7496	22.1596	3.36031
1879	16.528	12.6318	2.76036
1880	16.412	7.15837	2.82673
1881	19.6804	13.7132	3.532
1882	17.9232	9.47622	3.35991
1883	19.5813	15.2	3.20917
1884	13.4866	16.1293	3.97324
1885	19.4478	15.3043	3.62399
1886	17.531	11.4586	3.89952
1887	18.1084	13.9945	3.63288
1888	15.5738	15.9772	3.20543
1889	19.0338	16.317	3.07595
1890	16.7825	19.437	3.51588
1891	22.2301	16.9412	3.48101
1892	20.974	10.2428	3.54597
1893	12.7332	15.1892	3.11007
1894	8.39648	12.9539	3.73462
1895	27.8065	19.8145	3.07782
1896	20.3246	11.8183	3.09694
1897	17.7864	13.736	3.95099
1898	16.1686	19.8394	3.37971
1899	8.80894	16.3119	2.85892
1900	15.3623	11.3887	3.76399
1901	22.0601	19.9732	3.06182
1902	15.4599	19.9576	3.64727
1903	9.62783	17.9285	3.86936
1904	12.975	22.1778	3.68535
1905	14.9379	15.155	4.11007
1906	16.5543	15.9249	3.33255
1907	16.2445	21.5625	3.63452
1908	14.0156	7.76437	2.92218
1909	19.7729	13.6178	3.77526
1910	16.7668	19.9049	3.03843
1911	20.5363	15.5446	3.71568
1912	13.4471	13.6987	3.42477
1913	19.5084	7.09306	3.49692
1914	17.9301	14.7056	3.36144
1915	19.6001	14.9501	3.34388
1916	19.2738	16.225	3.4562
1917	15.0109	19.5684	2.93875
1918	22.7792	11.1034	4.09099
1919	14.033	17.8606	3.91086
1920	10.7883	13.91	3.02234
1921	25	26.4908	3.17509
1922	14.0427	17.4051	3.5139
1923	13.2721	17.8197	3.07235
1924	14.1309	16.367	3.88192
1925	15.146	17.619	3.29139
1926	14.9482	10.1938	3.83335
1927	25.4836	11.6995	2.74108
1928	9.35534	17.378	3.21273
1929	11.2094	16.855	3.7552
1930	21.8696	15.7125	3.44079
1931	16.4	13.7211	3.39809
1932	14.6853	15.033	3.64025
1933	11.7375	14.6303	3.4417
1934	13.7342	20.6576	3.69519
1935	16.1013	21.2119	2.97993
1936	24.2712	11.1614	3.45252
1937	18.0384	24.7162	3.38847
1938	14.1497	22.0494	3.86239
1939	21.8996	19.7545	3.39281
1940	17.3322	16.674	3.15767
1941	11.5977	10.1212	3.8148
1942	14.0085	23.9314	3.41885
1943	19.7809	9.59787	3.56299
1944	19.6185	16.8341	3.12522
1945	21.851	15.841	3.31818
1946	14.3212	23.4071	4.43629
1947	9.9766	18.4532	3.77639
1948	16.8559	21.3311	3.25406
1949	16.2358	21.9883	3.43674
1950	19.7649	20.7886	3.01152
1951	25.9888	9.45566	3.06185
1952	23.455	22.8997	4.08532
1953	18.0367	15.5081	3.2955
1954	12.7097	13.5408	3.30928
1955	15.6776	14.4994	2.98531
1956	9.87777	12.8577	3.60947
1957	15.585	16.2197	3.64023
1958	13.8833	14.7549	3.73216
1959	18.9207	16.8371	2.93466
1960	11.1705	21.9933	2.98545
1961	16.6002	15.2486	2.96126
1962	12.2876	21.0293	3.68757
1963	17.6785	13.8749	3.28381
1964	21.6946	11.1335	3.45891
1965	21.1787	19.9108	3.52235
1966	9.16844	14.0175	3.60145
1967	16.8299	13.5989	3.88351
1968	15.7488	15.9702	2.96338
1969	16.9399	20.56	4.11078
1970	22.1646	10.1368	3.16048
1971	8.38537	19.483	3.14597
1972	25.552	22.1819	3.87169
1973	11.4956	14.4615	3.56178
1974	20.4732	20.1052	3.56942
1975	15.5018	16.0036	3.08157
1976	17.2051	9.86564	3.64532
1977	15.5232	11.7073	2.65734
1978	18.4225	14.2028	3.42599
1979	12.5712	24.7331	3.21614
1980	20.1039	17.3485	2.82227
1981	22.3134	14.6101	4.15792
1982	19.9789	21.5109	4.19241
1983	22.4259	14.1172	2.86458
1984	7.41124	16.4583	3.11176
1985	18.399	17.1855	3.58865
1986	20.1033	24.666	3.18674
1987	17.8963	19.714	3.77786
1988	16.2005	11.3732	3.28305
1989	13.0318	22.3295	3.62388
1990	18.6	8.90459	3.39519
1991	15.4329	12.0727	2.95728
1992	19.251	16.5232	3.2478
1993	16.8237	9.28907	3.6446
1994	22.4948	12.1257	3.03332
1995	15.9774	11.4397	3.62256
1996	17.0354	15.8823	2.64637
1997	12.1849	9.49494	3.61159
1998	20.244	23.4895	3.48447
1999	15.0423	9.31416	3.69336
[truncated: 8,001 more rows]

## Sheet: Simulation Output Values 1
Sim #	ADD	ADD_carc	CR	HQ
1	5.18876e-09	2.49589e-10	2.07991e-11	0.000345917
2	5.17225e-09	2.48794e-10	2.07328e-11	0.000344816
3	7.74096e-09	3.72354e-10	3.10295e-11	0.000516064
4	6.08525e-09	2.92711e-10	2.43926e-11	0.000405683
5	5.24897e-09	2.52485e-10	2.10404e-11	0.000349931
6	3.6056e-09	1.73436e-10	1.4453e-11	0.000240374
7	6.48332e-09	3.11859e-10	2.59883e-11	0.000432221
8	1.0097e-08	4.85682e-10	4.04735e-11	0.000673131
9	1.09728e-08	5.27812e-10	4.39843e-11	0.000731522
10	3.63011e-09	1.74615e-10	1.45512e-11	0.000242007
11	5.46688e-09	2.62966e-10	2.19139e-11	0.000364458
12	6.10026e-09	2.93433e-10	2.44528e-11	0.000406684
13	4.74486e-09	2.28236e-10	1.90197e-11	0.000316324
14	4.90697e-09	2.36034e-10	1.96695e-11	0.000327132
15	2.93173e-09	1.41021e-10	1.17518e-11	0.000195449
16	4.16581e-09	2.00383e-10	1.66986e-11	0.000277721
17	5.39062e-09	2.59298e-10	2.16082e-11	0.000359375
18	8.37224e-09	4.0272e-10	3.356e-11	0.000558149
19	7.23141e-09	3.47844e-10	2.8987e-11	0.000482094
20	5.89757e-09	2.83684e-10	2.36403e-11	0.000393171
21	2.64856e-09	1.27401e-10	1.06167e-11	0.000176571
22	4.05246e-09	1.9493e-10	1.62442e-11	0.000270164
23	4.2966e-09	2.06674e-10	1.72228e-11	0.00028644
24	8.93762e-09	4.29915e-10	3.58263e-11	0.000595841
25	9.5274e-09	4.58285e-10	3.81904e-11	0.00063516
26	2.26955e-09	1.09169e-10	9.09744e-12	0.000151303
27	5.1144e-09	2.46012e-10	2.0501e-11	0.00034096
28	6.7561e-09	3.2498e-10	2.70817e-11	0.000450406
29	3.36823e-09	1.62018e-10	1.35015e-11	0.000224548
30	6.53041e-09	3.14124e-10	2.6177e-11	0.000435361
31	9.2303e-09	4.43994e-10	3.69995e-11	0.000615353
32	6.53786e-09	3.14482e-10	2.62069e-11	0.000435857
33	1.05325e-08	5.06629e-10	4.22191e-11	0.000702163
34	6.24716e-09	3.00499e-10	2.50416e-11	0.000416477
35	5.07481e-09	2.44107e-10	2.03423e-11	0.000338321
36	3.69067e-09	1.77528e-10	1.4794e-11	0.000246045
37	1.60146e-08	7.7033e-10	6.41942e-11	0.00106764
38	4.74254e-09	2.28124e-10	1.90104e-11	0.000316169
39	7.11249e-09	3.42123e-10	2.85103e-11	0.000474166
40	3.31077e-09	1.59254e-10	1.32711e-11	0.000220718
41	5.55574e-09	2.67241e-10	2.22701e-11	0.000370383
42	6.26356e-09	3.01288e-10	2.51073e-11	0.00041757
43	7.5341e-09	3.62404e-10	3.02003e-11	0.000502274
44	5.558e-09	2.6735e-10	2.22791e-11	0.000370533
45	8.17939e-09	3.93443e-10	3.27869e-11	0.000545293
46	6.94451e-09	3.34043e-10	2.78369e-11	0.000462968
47	6.39983e-09	3.07843e-10	2.56536e-11	0.000426656
48	6.14598e-09	2.95632e-10	2.4636e-11	0.000409732
49	5.30521e-09	2.5519e-10	2.12658e-11	0.000353681
50	6.0641e-09	2.91694e-10	2.43078e-11	0.000404273
51	9.25096e-09	4.44987e-10	3.70823e-11	0.000616731
52	2.17073e-09	1.04416e-10	8.70132e-12	0.000144715
53	3.55603e-09	1.71051e-10	1.42543e-11	0.000237069
54	2.90639e-09	1.39802e-10	1.16502e-11	0.000193759
55	5.02631e-09	2.41774e-10	2.01478e-11	0.000335087
56	2.66961e-09	1.28413e-10	1.07011e-11	0.000177974
57	1.01435e-08	4.8792e-10	4.066e-11	0.000676233
58	5.56614e-09	2.67741e-10	2.23118e-11	0.000371076
59	2.07937e-09	1.00022e-10	8.33513e-12	0.000138625
60	1.0783e-08	5.18681e-10	4.32234e-11	0.000718866
61	6.23554e-09	2.99941e-10	2.49951e-11	0.000415703
62	1.11765e-08	5.37607e-10	4.48006e-11	0.000745097
63	1.60674e-08	7.72872e-10	6.4406e-11	0.00107116
64	2.80797e-09	1.35068e-10	1.12557e-11	0.000187198
65	5.61784e-09	2.70228e-10	2.2519e-11	0.000374523
66	8.32592e-09	4.00491e-10	3.33743e-11	0.000555061
67	1.1948e-08	5.74718e-10	4.78932e-11	0.000796531
68	4.32238e-09	2.07914e-10	1.73262e-11	0.000288159
69	6.70026e-09	3.22294e-10	2.68579e-11	0.000446684
70	6.08607e-09	2.92751e-10	2.43959e-11	0.000405738
71	1.06721e-08	5.13348e-10	4.2779e-11	0.000711476
72	6.55422e-09	3.15269e-10	2.62725e-11	0.000436948
73	5.12224e-09	2.46389e-10	2.05324e-11	0.000341482
74	1.17222e-08	5.6386e-10	4.69884e-11	0.000781483
75	9.95265e-09	4.7874e-10	3.9895e-11	0.00066351
76	8.65519e-09	4.1633e-10	3.46942e-11	0.000577013
77	7.56234e-09	3.63762e-10	3.03135e-11	0.000504156
78	1.07085e-08	5.15097e-10	4.29248e-11	0.000713899
79	7.85591e-09	3.77883e-10	3.14903e-11	0.000523728
80	7.40488e-09	3.56188e-10	2.96823e-11	0.000493659
81	6.03847e-09	2.90461e-10	2.42051e-11	0.000402565
82	4.1384e-09	1.99064e-10	1.65887e-11	0.000275893
83	1.00145e-08	4.81714e-10	4.01429e-11	0.000667632
84	5.74669e-09	2.76426e-10	2.30355e-11	0.000383113
85	8.13908e-09	3.91504e-10	3.26253e-11	0.000542605
86	7.90667e-09	3.80325e-10	3.16937e-11	0.000527111
87	5.02819e-09	2.41865e-10	2.01554e-11	0.000335212
88	5.24517e-09	2.52302e-10	2.10252e-11	0.000349678
89	5.01298e-09	2.41133e-10	2.00944e-11	0.000334198
90	5.56446e-09	2.6766e-10	2.2305e-11	0.000370964
91	8.86108e-09	4.26234e-10	3.55195e-11	0.000590739
92	7.77504e-09	3.73993e-10	3.11661e-11	0.000518336
93	6.93455e-09	3.33564e-10	2.7797e-11	0.000462303
94	8.94012e-09	4.30035e-10	3.58363e-11	0.000596008
95	8.39966e-09	4.04038e-10	3.36699e-11	0.000559977
96	3.22997e-09	1.55367e-10	1.29473e-11	0.000215331
97	6.68829e-09	3.21719e-10	2.68099e-11	0.000445886
98	6.43663e-09	3.09613e-10	2.58011e-11	0.000429109
99	5.18232e-09	2.49279e-10	2.07732e-11	0.000345488
100	8.61834e-09	4.14557e-10	3.45464e-11	0.000574556
101	5.93662e-09	2.85562e-10	2.37968e-11	0.000395775
102	7.1236e-09	3.42658e-10	2.85548e-11	0.000474906
103	5.93373e-09	2.85423e-10	2.37852e-11	0.000395582
104	8.25216e-09	3.96943e-10	3.30786e-11	0.000550144
105	5.00609e-09	2.40802e-10	2.00668e-11	0.000333739
106	7.42903e-09	3.57349e-10	2.97791e-11	0.000495269
107	6.67722e-09	3.21186e-10	2.67655e-11	0.000445148
108	4.96599e-09	2.38873e-10	1.99061e-11	0.000331066
109	4.42118e-09	2.12667e-10	1.77222e-11	0.000294746
110	8.78194e-09	4.22427e-10	3.52022e-11	0.000585463
111	1.03498e-08	4.97841e-10	4.14868e-11	0.000689983
112	5.9084e-09	2.84204e-10	2.36837e-11	0.000393893
113	5.01943e-09	2.41444e-10	2.01203e-11	0.000334629
114	6.22609e-09	2.99486e-10	2.49572e-11	0.000415073
115	4.07546e-09	1.96037e-10	1.63364e-11	0.000271698
116	7.61727e-09	3.66404e-10	3.05337e-11	0.000507818
117	5.44869e-09	2.62092e-10	2.1841e-11	0.000363246
118	3.40361e-09	1.6372e-10	1.36433e-11	0.000226908
119	5.49505e-09	2.64322e-10	2.20268e-11	0.000366337
120	7.30299e-09	3.51287e-10	2.92739e-11	0.000486866
121	4.50657e-09	2.16774e-10	1.80645e-11	0.000300438
122	5.08361e-09	2.44531e-10	2.03776e-11	0.000338908
123	3.75759e-09	1.80747e-10	1.50622e-11	0.000250506
124	5.99032e-09	2.88145e-10	2.40121e-11	0.000399355
125	4.18903e-09	2.015e-10	1.67917e-11	0.000279269
126	1.15681e-08	5.56446e-10	4.63705e-11	0.000771207
127	3.83732e-09	1.84582e-10	1.53818e-11	0.000255822
128	7.75727e-09	3.73138e-10	3.10948e-11	0.000517151
129	7.16893e-09	3.44838e-10	2.87365e-11	0.000477929
130	3.00254e-09	1.44427e-10	1.20356e-11	0.000200169
131	7.28795e-09	3.50563e-10	2.92136e-11	0.000485863
132	4.35706e-09	2.09582e-10	1.74652e-11	0.000290471
133	5.8041e-09	2.79187e-10	2.32656e-11	0.00038694
134	9.37054e-09	4.5074e-10	3.75616e-11	0.000624703
135	2.73036e-09	1.31335e-10	1.09446e-11	0.000182024
136	2.40849e-09	1.15852e-10	9.65437e-12	0.000160566
137	6.86882e-09	3.30402e-10	2.75335e-11	0.000457922
138	8.67992e-09	4.17519e-10	3.47933e-11	0.000578661
139	4.28378e-09	2.06057e-10	1.71714e-11	0.000285585
140	5.25865e-09	2.5295e-10	2.10792e-11	0.000350577
141	6.0519e-09	2.91107e-10	2.42589e-11	0.00040346
142	8.69683e-09	4.18333e-10	3.48611e-11	0.000579789
143	6.31781e-09	3.03898e-10	2.53248e-11	0.000421188
144	5.57625e-09	2.68227e-10	2.23523e-11	0.00037175
145	4.42438e-09	2.1282e-10	1.7735e-11	0.000294959
146	1.34078e-08	6.4494e-10	5.3745e-11	0.000893855
147	4.35817e-09	2.09636e-10	1.74696e-11	0.000290545
148	1.03521e-08	4.97954e-10	4.14962e-11	0.00069014
149	5.4141e-09	2.60428e-10	2.17023e-11	0.00036094
150	5.52397e-09	2.65713e-10	2.21427e-11	0.000368265
151	8.75705e-09	4.2123e-10	3.51025e-11	0.000583804
152	1.50656e-08	7.24683e-10	6.03903e-11	0.00100438
153	8.06742e-09	3.88057e-10	3.23381e-11	0.000537828
154	8.64939e-09	4.16051e-10	3.46709e-11	0.000576626
155	4.37666e-09	2.10525e-10	1.75438e-11	0.000291777
156	6.60867e-09	3.17889e-10	2.64907e-11	0.000440578
157	2.41734e-08	1.16278e-09	9.68987e-11	0.00161156
158	9.77331e-09	4.70113e-10	3.91761e-11	0.000651554
159	4.73401e-09	2.27714e-10	1.89762e-11	0.0003156
160	1.00944e-08	4.85559e-10	4.04632e-11	0.00067296
161	7.72142e-09	3.71414e-10	3.09511e-11	0.000514761
162	8.74189e-09	4.205e-10	3.50417e-11	0.000582793
163	6.69787e-09	3.22179e-10	2.68483e-11	0.000446525
164	6.6985e-09	3.2221e-10	2.68508e-11	0.000446567
165	1.06566e-08	5.12602e-10	4.27169e-11	0.000710442
166	7.93817e-09	3.8184e-10	3.182e-11	0.000529211
167	4.28127e-09	2.05936e-10	1.71614e-11	0.000285418
168	9.58691e-09	4.61147e-10	3.84289e-11	0.000639127
169	1.28693e-08	6.19035e-10	5.15863e-11	0.000857952
170	1.13344e-08	5.45206e-10	4.54339e-11	0.000755629
171	6.80097e-09	3.27139e-10	2.72615e-11	0.000453398
172	1.24205e-08	5.97448e-10	4.97873e-11	0.000828033
173	9.6367e-09	4.63542e-10	3.86285e-11	0.000642447
174	8.02062e-09	3.85806e-10	3.21505e-11	0.000534708
175	8.4188e-09	4.04959e-10	3.37466e-11	0.000561253
176	1.20023e-08	5.77333e-10	4.81111e-11	0.000800155
177	5.45719e-09	2.625e-10	2.1875e-11	0.000363812
178	8.63954e-09	4.15577e-10	3.46314e-11	0.000575969
179	7.19704e-09	3.46191e-10	2.88492e-11	0.000479803
180	6.11897e-09	2.94333e-10	2.45278e-11	0.000407932
181	6.23707e-09	3.00014e-10	2.50012e-11	0.000415804
182	7.48899e-09	3.60234e-10	3.00195e-11	0.000499266
183	1.2713e-08	6.11516e-10	5.09597e-11	0.000847531
184	4.30564e-09	2.07109e-10	1.72591e-11	0.000287043
185	1.21965e-08	5.86671e-10	4.88893e-11	0.000813097
186	5.20147e-09	2.502e-10	2.085e-11	0.000346765
187	1.19878e-08	5.76633e-10	4.80527e-11	0.000799185
188	6.12483e-09	2.94615e-10	2.45513e-11	0.000408322
189	3.71378e-09	1.7864e-10	1.48866e-11	0.000247586
190	3.71814e-09	1.78849e-10	1.49041e-11	0.000247876
191	1.16307e-08	5.59457e-10	4.66214e-11	0.00077538
192	5.80211e-09	2.79092e-10	2.32576e-11	0.000386807
193	3.66087e-09	1.76094e-10	1.46745e-11	0.000244058
194	8.66004e-09	4.16563e-10	3.47136e-11	0.000577336
195	4.04405e-09	1.94526e-10	1.62105e-11	0.000269603
196	7.04951e-09	3.39094e-10	2.82578e-11	0.000469967
197	3.24707e-09	1.5619e-10	1.30158e-11	0.000216471
198	6.11968e-09	2.94367e-10	2.45306e-11	0.000407978
199	5.03605e-09	2.42243e-10	2.01869e-11	0.000335737
200	4.82068e-09	2.31883e-10	1.93236e-11	0.000321378
201	9.48822e-09	4.564e-10	3.80333e-11	0.000632548
202	5.80764e-09	2.79358e-10	2.32798e-11	0.000387176
203	4.14853e-09	1.99552e-10	1.66293e-11	0.000276569
204	7.00666e-09	3.37033e-10	2.80861e-11	0.000467111
205	7.80385e-09	3.75379e-10	3.12816e-11	0.000520257
206	8.7471e-09	4.20751e-10	3.50626e-11	0.00058314
207	5.47858e-09	2.63529e-10	2.19608e-11	0.000365238
208	6.55014e-09	3.15073e-10	2.62561e-11	0.000436676
209	8.21183e-09	3.95004e-10	3.2917e-11	0.000547455
210	5.07553e-09	2.44142e-10	2.03452e-11	0.000338369
211	9.46434e-09	4.55251e-10	3.79376e-11	0.000630956
212	7.15582e-09	3.44208e-10	2.8684e-11	0.000477055
213	5.19714e-09	2.49991e-10	2.08326e-11	0.000346476
214	4.40098e-09	2.11695e-10	1.76412e-11	0.000293398
215	3.85492e-09	1.85429e-10	1.54524e-11	0.000256995
216	5.73845e-09	2.7603e-10	2.30025e-11	0.000382564
217	6.18321e-09	2.97424e-10	2.47853e-11	0.000412214
218	9.33703e-09	4.49127e-10	3.74273e-11	0.000622468
219	8.67813e-09	4.17433e-10	3.47861e-11	0.000578542
220	7.24345e-09	3.48423e-10	2.90352e-11	0.000482897
221	4.15523e-09	1.99874e-10	1.66562e-11	0.000277015
222	4.79408e-09	2.30604e-10	1.9217e-11	0.000319605
223	6.85555e-09	3.29764e-10	2.74803e-11	0.000457037
224	6.93002e-09	3.33346e-10	2.77788e-11	0.000462001
225	4.11626e-09	1.98e-10	1.65e-11	0.000274418
226	7.50623e-09	3.61063e-10	3.00886e-11	0.000500415
227	7.3649e-09	3.54265e-10	2.95221e-11	0.000490993
228	6.49425e-09	3.12385e-10	2.60321e-11	0.00043295
229	6.2601e-09	3.01122e-10	2.50935e-11	0.00041734
230	4.47328e-09	2.15173e-10	1.79311e-11	0.000298219
231	6.93968e-09	3.33811e-10	2.78176e-11	0.000462645
232	1.2405e-08	5.96704e-10	4.97253e-11	0.000827002
233	5.72655e-09	2.75457e-10	2.29548e-11	0.00038177
234	5.00748e-09	2.40869e-10	2.00724e-11	0.000333832
235	2.74588e-09	1.32082e-10	1.10068e-11	0.000183059
236	1.34325e-08	6.46125e-10	5.38437e-11	0.000895497
237	3.25325e-09	1.56487e-10	1.30406e-11	0.000216884
238	5.88914e-09	2.83278e-10	2.36065e-11	0.00039261
239	5.16952e-09	2.48663e-10	2.07219e-11	0.000344635
240	2.59014e-09	1.2459e-10	1.03825e-11	0.000172676
241	2.10501e-08	1.01255e-09	8.4379e-11	0.00140334
242	7.82451e-09	3.76373e-10	3.13644e-11	0.000521634
243	1.50612e-08	7.2447e-10	6.03725e-11	0.00100408
244	1.30155e-08	6.26067e-10	5.21723e-11	0.000867698
245	7.77614e-09	3.74046e-10	3.11705e-11	0.000518409
246	4.36451e-09	2.0994e-10	1.7495e-11	0.000290967
247	7.10192e-09	3.41615e-10	2.84679e-11	0.000473461
248	6.94502e-09	3.34068e-10	2.7839e-11	0.000463001
249	1.07264e-08	5.1596e-10	4.29967e-11	0.000715095
250	6.60752e-09	3.17833e-10	2.64861e-11	0.000440501
251	7.05932e-09	3.39566e-10	2.82971e-11	0.000470621
252	9.68315e-09	4.65777e-10	3.88147e-11	0.000645543
253	1.41963e-08	6.82866e-10	5.69055e-11	0.000946418
254	6.69185e-09	3.2189e-10	2.68241e-11	0.000446123
255	6.99116e-09	3.36287e-10	2.80239e-11	0.000466077
256	6.68435e-09	3.21529e-10	2.67941e-11	0.000445623
257	5.02126e-09	2.41531e-10	2.01276e-11	0.000334751
258	1.00491e-08	4.8338e-10	4.02816e-11	0.00066994
259	7.13046e-09	3.42988e-10	2.85823e-11	0.000475364
260	6.4466e-09	3.10093e-10	2.58411e-11	0.000429773
261	3.27594e-09	1.57578e-10	1.31315e-11	0.000218396
262	4.98014e-09	2.39553e-10	1.99628e-11	0.000332009
263	7.00074e-09	3.36748e-10	2.80623e-11	0.000466716
264	8.01329e-09	3.85453e-10	3.21211e-11	0.000534219
265	7.52318e-09	3.61878e-10	3.01565e-11	0.000501545
266	3.78875e-09	1.82245e-10	1.51871e-11	0.000252583
267	8.47928e-09	4.07868e-10	3.3989e-11	0.000565285
268	4.10761e-09	1.97583e-10	1.64653e-11	0.000273841
269	6.95525e-09	3.3456e-10	2.788e-11	0.000463683
270	7.65909e-09	3.68416e-10	3.07013e-11	0.000510606
271	9.95703e-09	4.78951e-10	3.99126e-11	0.000663802
272	5.39604e-09	2.59559e-10	2.16299e-11	0.000359736
273	8.79438e-09	4.23025e-10	3.52521e-11	0.000586292
274	6.67597e-09	3.21126e-10	2.67605e-11	0.000445065
275	5.1996e-09	2.5011e-10	2.08425e-11	0.00034664
276	5.02926e-09	2.41916e-10	2.01597e-11	0.000335284
277	5.8617e-09	2.81958e-10	2.34965e-11	0.00039078
278	7.17663e-09	3.45209e-10	2.87674e-11	0.000478442
279	5.96021e-09	2.86697e-10	2.38914e-11	0.000397347
280	2.90692e-09	1.39828e-10	1.16523e-11	0.000193795
281	8.26054e-09	3.97347e-10	3.31122e-11	0.000550703
282	7.09233e-09	3.41154e-10	2.84295e-11	0.000472822
283	1.15192e-08	5.54094e-10	4.61745e-11	0.000767946
284	5.78122e-09	2.78087e-10	2.31739e-11	0.000385415
285	5.62105e-09	2.70382e-10	2.25319e-11	0.000374736
286	6.02922e-09	2.90016e-10	2.4168e-11	0.000401948
287	8.88612e-09	4.27438e-10	3.56198e-11	0.000592408
288	3.34052e-09	1.60685e-10	1.33904e-11	0.000222701
289	1.20257e-08	5.78458e-10	4.82048e-11	0.000801714
290	2.72099e-09	1.30884e-10	1.0907e-11	0.000181399
291	1.25293e-08	6.02682e-10	5.02235e-11	0.000835288
292	1.07757e-08	5.18329e-10	4.31941e-11	0.000718379
293	6.1088e-09	2.93844e-10	2.4487e-11	0.000407253
294	1.04091e-08	5.00697e-10	4.17247e-11	0.000693941
295	1.12549e-08	5.41382e-10	4.51152e-11	0.000750329
296	4.31352e-09	2.07488e-10	1.72907e-11	0.000287568
297	6.62253e-09	3.18555e-10	2.65463e-11	0.000441502
298	4.70314e-09	2.26229e-10	1.88525e-11	0.000313543
299	5.59448e-09	2.69104e-10	2.24253e-11	0.000372965
300	6.16433e-09	2.96515e-10	2.47096e-11	0.000410955
301	6.49155e-09	3.12255e-10	2.60213e-11	0.00043277
302	3.79423e-09	1.82509e-10	1.52091e-11	0.000252949
303	1.31598e-08	6.33008e-10	5.27507e-11	0.000877318
304	7.9563e-09	3.82712e-10	3.18927e-11	0.00053042
305	1.02974e-08	4.95323e-10	4.12769e-11	0.000686493
306	7.7354e-09	3.72087e-10	3.10072e-11	0.000515694
307	3.33051e-09	1.60203e-10	1.33503e-11	0.000222034
308	3.34212e-09	1.60762e-10	1.33968e-11	0.000222808
309	3.37817e-09	1.62496e-10	1.35413e-11	0.000225211
310	7.04742e-09	3.38993e-10	2.82494e-11	0.000469828
311	4.5383e-09	2.183e-10	1.81917e-11	0.000302553
312	5.47923e-09	2.6356e-10	2.19634e-11	0.000365282
313	3.83367e-09	1.84406e-10	1.53672e-11	0.000255578
314	2.25113e-09	1.08283e-10	9.0236e-12	0.000150075
315	2.96759e-09	1.42746e-10	1.18955e-11	0.000197839
316	8.18572e-09	3.93747e-10	3.28123e-11	0.000545715
317	4.58355e-09	2.20477e-10	1.83731e-11	0.00030557
318	2.60353e-09	1.25234e-10	1.04362e-11	0.000173568
319	5.29071e-09	2.54493e-10	2.12077e-11	0.000352714
320	6.38207e-09	3.06989e-10	2.55824e-11	0.000425472
321	6.88967e-09	3.31405e-10	2.76171e-11	0.000459311
322	4.27973e-09	2.05863e-10	1.71552e-11	0.000285316
323	9.80343e-09	4.71562e-10	3.92969e-11	0.000653562
324	1.17657e-08	5.65952e-10	4.71627e-11	0.000784382
325	6.71647e-09	3.23074e-10	2.69229e-11	0.000447765
326	7.28911e-09	3.50619e-10	2.92182e-11	0.00048594
327	8.12297e-09	3.90729e-10	3.25608e-11	0.000541531
328	7.64215e-09	3.67601e-10	3.06334e-11	0.000509476
329	5.38803e-09	2.59174e-10	2.15978e-11	0.000359202
330	6.3381e-09	3.04874e-10	2.54061e-11	0.00042254
331	7.91582e-09	3.80765e-10	3.17304e-11	0.000527722
332	5.16029e-09	2.48219e-10	2.06849e-11	0.000344019
333	5.82619e-09	2.8025e-10	2.33542e-11	0.000388413
334	1.60588e-08	7.72456e-10	6.43713e-11	0.00107059
335	8.42179e-09	4.05103e-10	3.37586e-11	0.000561453
336	8.84778e-09	4.25594e-10	3.54661e-11	0.000589852
337	1.77507e-08	8.53842e-10	7.11535e-11	0.00118338
338	5.30311e-09	2.55089e-10	2.12574e-11	0.000353541
339	1.13442e-08	5.45678e-10	4.54732e-11	0.000756283
340	4.38473e-09	2.10913e-10	1.75761e-11	0.000292315
341	7.26283e-09	3.49355e-10	2.91129e-11	0.000484189
342	4.09232e-09	1.96848e-10	1.6404e-11	0.000272821
343	5.58976e-09	2.68877e-10	2.24065e-11	0.000372651
344	7.30677e-09	3.51469e-10	2.9289e-11	0.000487118
345	4.86424e-09	2.33979e-10	1.94982e-11	0.000324283
346	1.23755e-08	5.95282e-10	4.96068e-11	0.000825032
347	1.81568e-08	8.73374e-10	7.27811e-11	0.00121045
348	6.58311e-09	3.16659e-10	2.63883e-11	0.000438874
349	8.989e-09	4.32387e-10	3.60322e-11	0.000599267
350	4.26104e-09	2.04963e-10	1.70803e-11	0.000284069
351	1.10069e-08	5.29449e-10	4.41208e-11	0.00073379
352	4.94994e-09	2.38101e-10	1.98418e-11	0.000329996
353	5.71024e-09	2.74673e-10	2.28894e-11	0.000380683
354	3.27635e-09	1.57598e-10	1.31332e-11	0.000218424
355	7.6507e-09	3.68012e-10	3.06677e-11	0.000510047
356	5.18688e-09	2.49498e-10	2.07915e-11	0.000345792
357	1.24883e-08	6.00708e-10	5.0059e-11	0.000832552
358	5.50152e-09	2.64633e-10	2.20527e-11	0.000366768
359	1.12265e-08	5.40014e-10	4.50012e-11	0.000748433
360	9.16974e-09	4.41081e-10	3.67567e-11	0.000611316
361	1.45619e-08	7.00454e-10	5.83712e-11	0.000970795
362	4.42967e-09	2.13075e-10	1.77563e-11	0.000295311
363	7.21084e-09	3.46854e-10	2.89045e-11	0.000480723
364	5.85905e-09	2.81831e-10	2.34859e-11	0.000390603
365	6.77785e-09	3.26027e-10	2.71689e-11	0.000451857
366	9.06991e-09	4.36279e-10	3.63566e-11	0.000604661
367	5.6348e-09	2.71044e-10	2.2587e-11	0.000375653
368	6.70872e-09	3.22701e-10	2.68918e-11	0.000447248
369	8.02559e-09	3.86045e-10	3.21704e-11	0.000535039
370	7.07878e-09	3.40502e-10	2.83751e-11	0.000471918
371	5.43854e-09	2.61604e-10	2.18003e-11	0.00036257
372	3.56544e-09	1.71504e-10	1.4292e-11	0.000237696
373	3.46496e-09	1.66671e-10	1.38892e-11	0.000230997
374	4.26818e-09	2.05307e-10	1.71089e-11	0.000284546
375	3.80886e-09	1.83213e-10	1.52677e-11	0.000253924
376	6.22744e-09	2.99551e-10	2.49625e-11	0.000415162
377	6.69273e-09	3.21932e-10	2.68277e-11	0.000446182
378	5.66219e-09	2.72361e-10	2.26968e-11	0.000377479
379	2.5691e-09	1.23578e-10	1.02982e-11	0.000171273
380	5.85566e-09	2.81668e-10	2.34723e-11	0.000390377
381	7.21794e-09	3.47196e-10	2.8933e-11	0.000481196
382	5.46553e-09	2.62901e-10	2.19085e-11	0.000364368
383	8.04846e-09	3.87145e-10	3.22621e-11	0.000536564
384	5.67442e-09	2.7295e-10	2.27458e-11	0.000378295
385	1.12527e-08	5.41276e-10	4.51064e-11	0.000750182
386	1.14954e-08	5.52947e-10	4.60789e-11	0.000766357
387	7.70522e-09	3.70634e-10	3.08862e-11	0.000513681
388	8.61933e-09	4.14605e-10	3.45504e-11	0.000574622
389	9.0764e-09	4.36591e-10	3.63826e-11	0.000605093
390	4.57355e-09	2.19996e-10	1.8333e-11	0.000304903
391	1.187e-08	5.70966e-10	4.75805e-11	0.000791331
392	7.08039e-09	3.40579e-10	2.83816e-11	0.000472026
393	6.03693e-09	2.90387e-10	2.41989e-11	0.000402462
394	1.02082e-08	4.91035e-10	4.09196e-11	0.00068055
395	3.54167e-09	1.70361e-10	1.41967e-11	0.000236111
396	6.69055e-09	3.21827e-10	2.68189e-11	0.000446037
397	7.13032e-09	3.42981e-10	2.85817e-11	0.000475355
398	7.42693e-09	3.57248e-10	2.97707e-11	0.000495129
399	5.61001e-09	2.69851e-10	2.24876e-11	0.000374001
400	9.04898e-09	4.35272e-10	3.62726e-11	0.000603265
401	6.60838e-09	3.17875e-10	2.64896e-11	0.000440559
402	4.53492e-09	2.18138e-10	1.81781e-11	0.000302328
403	3.8908e-09	1.87154e-10	1.55962e-11	0.000259387
404	6.22304e-09	2.99339e-10	2.49449e-11	0.000414869
405	2.31547e-09	1.11378e-10	9.28151e-12	0.000154365
406	8.95299e-09	4.30654e-10	3.58879e-11	0.000596866
407	7.02485e-09	3.37908e-10	2.8159e-11	0.000468323
408	1.39408e-08	6.70578e-10	5.58815e-11	0.000929388
409	5.55622e-09	2.67264e-10	2.2272e-11	0.000370415
410	6.91211e-09	3.32484e-10	2.7707e-11	0.000460807
411	9.73748e-09	4.6839e-10	3.90325e-11	0.000649166
412	1.10049e-08	5.29357e-10	4.41131e-11	0.000733663
413	9.10377e-09	4.37907e-10	3.64923e-11	0.000606918
414	1.1969e-08	5.75731e-10	4.79776e-11	0.000797935
415	7.75294e-09	3.7293e-10	3.10775e-11	0.000516863
416	4.25223e-09	2.0454e-10	1.7045e-11	0.000283482
417	1.26439e-08	6.08195e-10	5.06829e-11	0.000842928
418	6.42787e-09	3.09192e-10	2.5766e-11	0.000428525
419	8.22399e-09	3.95588e-10	3.29657e-11	0.000548266
420	4.51951e-09	2.17397e-10	1.81164e-11	0.000301301
421	1.04055e-08	5.00521e-10	4.17101e-11	0.000693697
422	3.03405e-09	1.45943e-10	1.21619e-11	0.00020227
423	4.80036e-09	2.30906e-10	1.92422e-11	0.000320024
424	1.09093e-08	5.24755e-10	4.37295e-11	0.000727284
425	3.81071e-09	1.83302e-10	1.52752e-11	0.000254047
426	5.1168e-09	2.46127e-10	2.05106e-11	0.00034112
427	4.71206e-09	2.26658e-10	1.88882e-11	0.000314137
428	4.90613e-09	2.35993e-10	1.96661e-11	0.000327075
429	4.11945e-09	1.98153e-10	1.65127e-11	0.00027463
430	5.06113e-09	2.43449e-10	2.02874e-11	0.000337409
431	7.24911e-09	3.48695e-10	2.90579e-11	0.000483274
432	3.59276e-09	1.72818e-10	1.44015e-11	0.000239517
433	6.86341e-09	3.30142e-10	2.75119e-11	0.000457561
434	9.81056e-09	4.71905e-10	3.93254e-11	0.000654038
435	7.34702e-09	3.53405e-10	2.94504e-11	0.000489801
436	5.21528e-09	2.50864e-10	2.09053e-11	0.000347685
437	5.85254e-09	2.81518e-10	2.34598e-11	0.00039017
438	6.90952e-09	3.3236e-10	2.76967e-11	0.000460635
439	8.00039e-09	3.84833e-10	3.20694e-11	0.000533359
440	1.46819e-08	7.06224e-10	5.8852e-11	0.000978792
441	7.0997e-09	3.41508e-10	2.8459e-11	0.000473313
442	3.07267e-09	1.47801e-10	1.23168e-11	0.000204845
443	7.70072e-09	3.70418e-10	3.08682e-11	0.000513381
444	6.26224e-09	3.01225e-10	2.51021e-11	0.000417483
445	1.44636e-08	6.95726e-10	5.79772e-11	0.000964243
446	1.61875e-08	7.78646e-10	6.48872e-11	0.00107916
447	8.07417e-09	3.88382e-10	3.23652e-11	0.000538278
448	5.86612e-09	2.82171e-10	2.35142e-11	0.000391075
449	6.65499e-09	3.20117e-10	2.66764e-11	0.000443666
450	3.91571e-09	1.88353e-10	1.5696e-11	0.000261047
451	5.06295e-09	2.43537e-10	2.02947e-11	0.00033753
452	4.76174e-09	2.29048e-10	1.90873e-11	0.000317449
453	8.87756e-09	4.27026e-10	3.55855e-11	0.000591837
454	7.83199e-09	3.76733e-10	3.13944e-11	0.000522133
455	7.39572e-09	3.55747e-10	2.96456e-11	0.000493048
456	9.66063e-09	4.64693e-10	3.87245e-11	0.000644042
457	6.89308e-09	3.31569e-10	2.76308e-11	0.000459538
458	3.23851e-09	1.55778e-10	1.29815e-11	0.000215901
459	6.83436e-09	3.28745e-10	2.73954e-11	0.000455624
460	4.46723e-09	2.14882e-10	1.79068e-11	0.000297816
461	1.15784e-08	5.56939e-10	4.64116e-11	0.00077189
462	6.80468e-09	3.27317e-10	2.72764e-11	0.000453645
463	9.264e-09	4.45615e-10	3.71346e-11	0.0006176
464	9.64146e-09	4.63771e-10	3.86476e-11	0.000642764
465	1.06954e-08	5.14468e-10	4.28724e-11	0.000713028
466	7.41647e-09	3.56745e-10	2.97288e-11	0.000494431
467	5.51232e-09	2.65152e-10	2.2096e-11	0.000367488
468	6.30391e-09	3.03229e-10	2.52691e-11	0.000420261
469	3.43446e-09	1.65203e-10	1.3767e-11	0.000228964
470	1.33811e-08	6.43655e-10	5.36379e-11	0.000892074
471	4.30385e-09	2.07023e-10	1.72519e-11	0.000286923
472	6.95887e-09	3.34734e-10	2.78945e-11	0.000463925
473	9.74753e-09	4.68874e-10	3.90728e-11	0.000649836
474	6.47588e-09	3.11501e-10	2.59584e-11	0.000431725
475	5.91856e-09	2.84693e-10	2.37244e-11	0.00039457
476	6.2798e-09	3.02069e-10	2.51724e-11	0.000418653
477	9.21759e-09	4.43383e-10	3.69485e-11	0.000614506
478	5.09199e-09	2.44934e-10	2.04111e-11	0.000339466
479	5.59801e-09	2.69274e-10	2.24395e-11	0.000373201
480	8.05688e-09	3.8755e-10	3.22959e-11	0.000537126
481	6.90288e-09	3.3204e-10	2.767e-11	0.000460192
482	4.56468e-09	2.19569e-10	1.82974e-11	0.000304312
483	7.47651e-09	3.59633e-10	2.99694e-11	0.000498434
484	7.46543e-09	3.591e-10	2.9925e-11	0.000497695
485	4.90428e-09	2.35904e-10	1.96587e-11	0.000326952
486	6.29345e-09	3.02726e-10	2.52272e-11	0.000419564
487	7.86581e-09	3.78359e-10	3.15299e-11	0.000524387
488	2.43296e-08	1.1703e-09	9.75246e-11	0.00162197
489	7.91693e-09	3.80818e-10	3.17348e-11	0.000527795
490	9.57882e-09	4.60758e-10	3.83965e-11	0.000638588
491	6.15434e-09	2.96035e-10	2.46696e-11	0.000410289
492	1.34552e-08	6.4722e-10	5.3935e-11	0.000897015
493	6.9178e-09	3.32759e-10	2.77299e-11	0.000461187
494	1.68709e-08	8.11518e-10	6.76265e-11	0.00112472
495	8.41438e-09	4.04747e-10	3.37289e-11	0.000560959
496	3.37418e-09	1.62304e-10	1.35253e-11	0.000224945
497	1.0619e-08	5.10793e-10	4.2566e-11	0.000707933
498	5.60286e-09	2.69507e-10	2.2459e-11	0.000373524
499	9.55646e-09	4.59683e-10	3.83069e-11	0.000637097
500	9.0599e-09	4.35797e-10	3.63164e-11	0.000603993
501	2.39235e-09	1.15076e-10	9.5897e-12	0.00015949
502	6.6787e-09	3.21257e-10	2.67714e-11	0.000445247
503	1.16378e-08	5.59801e-10	4.66501e-11	0.000775857
504	7.31082e-09	3.51663e-10	2.93053e-11	0.000487388
505	1.06334e-08	5.11486e-10	4.26238e-11	0.000708894
506	5.43968e-09	2.61658e-10	2.18048e-11	0.000362645
507	6.31015e-09	3.03529e-10	2.52941e-11	0.000420677
508	7.82069e-09	3.76189e-10	3.13491e-11	0.000521379
509	8.57965e-09	4.12696e-10	3.43914e-11	0.000571977
510	1.14765e-08	5.52041e-10	4.60034e-11	0.000765102
511	8.68403e-09	4.17717e-10	3.48097e-11	0.000578935
512	7.04451e-09	3.38853e-10	2.82378e-11	0.000469634
513	5.14221e-09	2.47349e-10	2.06125e-11	0.000342814
514	9.29514e-09	4.47112e-10	3.72594e-11	0.000619676
515	8.22367e-09	3.95573e-10	3.29644e-11	0.000548244
516	9.41283e-09	4.52774e-10	3.77311e-11	0.000627522
517	9.29063e-09	4.46895e-10	3.72413e-11	0.000619375
518	4.32251e-09	2.0792e-10	1.73267e-11	0.000288167
519	1.00079e-08	4.81396e-10	4.01164e-11	0.000667191
520	5.14048e-09	2.47266e-10	2.06055e-11	0.000342699
521	5.31067e-09	2.55452e-10	2.12877e-11	0.000354044
522	6.70442e-09	3.22495e-10	2.68745e-11	0.000446962
523	4.91616e-09	2.36476e-10	1.97063e-11	0.000327744
524	1.0578e-08	5.08822e-10	4.24018e-11	0.000705202
525	1.00976e-08	4.85714e-10	4.04762e-11	0.000673176
526	1.04472e-08	5.02528e-10	4.18773e-11	0.000696479
527	9.91083e-09	4.76728e-10	3.97274e-11	0.000660722
528	7.5413e-09	3.6275e-10	3.02292e-11	0.000502754
529	6.44455e-09	3.09994e-10	2.58329e-11	0.000429637
530	1.18713e-08	5.71031e-10	4.75859e-11	0.00079142
531	8.48851e-09	4.08312e-10	3.4026e-11	0.000565901
532	3.89729e-09	1.87466e-10	1.56222e-11	0.000259819
533	7.46246e-09	3.58958e-10	2.99131e-11	0.000497497
534	3.35277e-09	1.61274e-10	1.34395e-11	0.000223518
535	5.8005e-09	2.79014e-10	2.32512e-11	0.0003867
536	8.50792e-09	4.09246e-10	3.41038e-11	0.000567194
537	6.9146e-09	3.32604e-10	2.7717e-11	0.000460973
538	7.68898e-09	3.69853e-10	3.08211e-11	0.000512599
539	1.12879e-08	5.42967e-10	4.52473e-11	0.000752526
540	9.38325e-09	4.51351e-10	3.76126e-11	0.00062555
541	1.13136e-08	5.44204e-10	4.53503e-11	0.00075424
542	3.78497e-09	1.82064e-10	1.5172e-11	0.000252332
543	8.44898e-09	4.06411e-10	3.38676e-11	0.000563265
544	7.28278e-09	3.50314e-10	2.91929e-11	0.000485518
545	6.35802e-09	3.05832e-10	2.5486e-11	0.000423868
546	1.15021e-08	5.53271e-10	4.61059e-11	0.000766806
547	4.94379e-09	2.37805e-10	1.98171e-11	0.000329586
548	2.1119e-09	1.01586e-10	8.46552e-12	0.000140794
549	7.87581e-09	3.7884e-10	3.157e-11	0.000525054
550	5.38105e-09	2.58838e-10	2.15698e-11	0.000358737
551	5.99228e-09	2.88239e-10	2.40199e-11	0.000399486
552	2.48582e-09	1.19572e-10	9.96435e-12	0.000165721
553	2.98292e-09	1.43484e-10	1.1957e-11	0.000198862
554	5.54375e-09	2.66664e-10	2.2222e-11	0.000369583
555	2.58745e-09	1.24461e-10	1.03717e-11	0.000172496
556	8.84955e-09	4.25679e-10	3.54732e-11	0.00058997
557	1.08957e-08	5.24101e-10	4.36751e-11	0.000726379
558	4.41858e-09	2.12542e-10	1.77118e-11	0.000294572
559	5.89221e-09	2.83426e-10	2.36188e-11	0.000392814
560	4.52395e-09	2.1761e-10	1.81342e-11	0.000301597
561	7.64776e-09	3.67871e-10	3.06559e-11	0.000509851
562	5.52474e-09	2.6575e-10	2.21458e-11	0.000368316
563	4.28771e-09	2.06247e-10	1.71872e-11	0.000285848
564	5.32999e-09	2.56382e-10	2.13652e-11	0.000355333
565	6.10467e-09	2.93645e-10	2.44705e-11	0.000406978
566	4.71684e-09	2.26888e-10	1.89074e-11	0.000314456
567	4.77368e-09	2.29622e-10	1.91352e-11	0.000318245
568	1.786e-08	8.59098e-10	7.15915e-11	0.00119067
569	5.28076e-09	2.54014e-10	2.11678e-11	0.000352051
570	7.44597e-09	3.58164e-10	2.9847e-11	0.000496398
571	4.93788e-09	2.37521e-10	1.97934e-11	0.000329192
572	7.63456e-09	3.67236e-10	3.0603e-11	0.000508971
573	5.9388e-09	2.85667e-10	2.38056e-11	0.00039592
574	3.72074e-09	1.78974e-10	1.49145e-11	0.000248049
575	4.32592e-09	2.08084e-10	1.73403e-11	0.000288394
576	6.08152e-09	2.92532e-10	2.43777e-11	0.000405435
577	9.51114e-09	4.57503e-10	3.81252e-11	0.000634076
578	2.90276e-09	1.39628e-10	1.16357e-11	0.000193517
579	8.97939e-09	4.31925e-10	3.59937e-11	0.000598626
580	6.03365e-09	2.90229e-10	2.41858e-11	0.000402243
581	1.12603e-08	5.41642e-10	4.51368e-11	0.000750688
582	5.35781e-09	2.5772e-10	2.14767e-11	0.000357187
583	1.05913e-08	5.09459e-10	4.24549e-11	0.000706084
584	7.21116e-09	3.46869e-10	2.89058e-11	0.000480744
585	3.83957e-09	1.8469e-10	1.53908e-11	0.000255971
586	6.41147e-09	3.08403e-10	2.57002e-11	0.000427431
587	8.47132e-09	4.07485e-10	3.39571e-11	0.000564755
588	8.64388e-09	4.15786e-10	3.46488e-11	0.000576259
589	5.32374e-09	2.56081e-10	2.13401e-11	0.000354916
590	9.66569e-09	4.64937e-10	3.87447e-11	0.000644379
591	7.78289e-09	3.74371e-10	3.11975e-11	0.000518859
592	6.12032e-09	2.94398e-10	2.45332e-11	0.000408022
593	1.4493e-08	6.97139e-10	5.80949e-11	0.000966201
594	6.74787e-09	3.24584e-10	2.70487e-11	0.000449858
595	5.35829e-09	2.57743e-10	2.14786e-11	0.000357219
596	6.1953e-09	2.98005e-10	2.48337e-11	0.00041302
597	6.1314e-09	2.94931e-10	2.45776e-11	0.00040876
598	5.32264e-09	2.56028e-10	2.13357e-11	0.000354843
599	9.37954e-09	4.51173e-10	3.75977e-11	0.000625303
600	9.61872e-09	4.62677e-10	3.85564e-11	0.000641248
601	7.30846e-09	3.5155e-10	2.92958e-11	0.000487231
602	8.27442e-09	3.98014e-10	3.31678e-11	0.000551628
603	1.54314e-08	7.42276e-10	6.18564e-11	0.00102876
604	7.08881e-09	3.40984e-10	2.84154e-11	0.000472588
605	5.47883e-09	2.63541e-10	2.19618e-11	0.000365256
606	4.6154e-09	2.22009e-10	1.85007e-11	0.000307693
607	4.58013e-09	2.20312e-10	1.83594e-11	0.000305342
608	6.71521e-09	3.23013e-10	2.69178e-11	0.000447681
609	4.50669e-09	2.1678e-10	1.8065e-11	0.000300446
610	6.26421e-09	3.01319e-10	2.51099e-11	0.000417614
611	6.74851e-09	3.24615e-10	2.70513e-11	0.000449901
612	6.96979e-09	3.35259e-10	2.79382e-11	0.000464652
613	5.95852e-09	2.86615e-10	2.38846e-11	0.000397235
614	5.51731e-09	2.65393e-10	2.2116e-11	0.000367821
615	5.1286e-09	2.46695e-10	2.05579e-11	0.000341906
616	7.50509e-09	3.61008e-10	3.0084e-11	0.000500339
617	7.82238e-09	3.7627e-10	3.13559e-11	0.000521492
618	4.54781e-09	2.18758e-10	1.82298e-11	0.000303187
619	1.54955e-08	7.45362e-10	6.21135e-11	0.00103303
620	8.37833e-09	4.03012e-10	3.35844e-11	0.000558555
621	5.0785e-09	2.44285e-10	2.03571e-11	0.000338567
622	3.86265e-09	1.858e-10	1.54834e-11	0.00025751
623	6.48751e-09	3.12061e-10	2.60051e-11	0.000432501
624	6.48427e-09	3.11905e-10	2.59921e-11	0.000432284
625	5.3586e-09	2.57758e-10	2.14798e-11	0.00035724
626	8.991e-09	4.32483e-10	3.60402e-11	0.0005994
627	1.83995e-08	8.85049e-10	7.3754e-11	0.00122663
628	4.13229e-09	1.9877e-10	1.65642e-11	0.000275486
629	3.15299e-09	1.51665e-10	1.26387e-11	0.0002102
630	8.36726e-09	4.0248e-10	3.354e-11	0.000557817
631	4.78104e-09	2.29977e-10	1.91647e-11	0.000318736
632	1.27297e-08	6.12322e-10	5.10268e-11	0.000848648
633	6.35057e-09	3.05474e-10	2.54561e-11	0.000423371
634	8.64925e-09	4.16044e-10	3.46703e-11	0.000576616
635	8.84541e-09	4.2548e-10	3.54566e-11	0.000589694
636	9.56519e-09	4.60102e-10	3.83419e-11	0.000637679
637	3.84438e-09	1.84921e-10	1.54101e-11	0.000256292
638	6.74908e-09	3.24643e-10	2.70536e-11	0.000449939
639	7.54527e-09	3.62941e-10	3.02451e-11	0.000503018
640	8.33344e-09	4.00853e-10	3.34044e-11	0.000555563
641	7.19799e-09	3.46236e-10	2.8853e-11	0.000479866
642	6.16192e-09	2.96399e-10	2.46999e-11	0.000410795
643	7.6391e-09	3.67454e-10	3.06212e-11	0.000509273
644	7.5148e-09	3.61475e-10	3.01229e-11	0.000500987
645	7.38479e-09	3.55221e-10	2.96018e-11	0.000492319
646	3.12021e-09	1.50088e-10	1.25073e-11	0.000208014
647	7.58048e-09	3.64634e-10	3.03862e-11	0.000505365
648	1.28354e-08	6.17406e-10	5.14505e-11	0.000855695
649	6.78714e-09	3.26473e-10	2.72061e-11	0.000452476
650	7.50744e-09	3.61121e-10	3.00934e-11	0.000500496
651	1.22666e-08	5.90045e-10	4.91705e-11	0.000817774
652	8.25658e-09	3.97156e-10	3.30964e-11	0.000550439
653	6.95163e-09	3.34386e-10	2.78655e-11	0.000463442
654	4.87675e-09	2.3458e-10	1.95484e-11	0.000325117
655	3.49576e-09	1.68152e-10	1.40127e-11	0.000233051
656	1.14886e-08	5.5262e-10	4.60517e-11	0.000765904
657	7.38334e-09	3.55152e-10	2.9596e-11	0.000492223
658	9.75109e-09	4.69045e-10	3.9087e-11	0.000650073
659	5.93254e-09	2.85366e-10	2.37805e-11	0.000395503
660	7.06713e-09	3.39941e-10	2.83285e-11	0.000471142
661	7.99336e-09	3.84495e-10	3.20412e-11	0.000532891
662	9.5123e-09	4.57559e-10	3.81299e-11	0.000634154
663	6.20134e-09	2.98295e-10	2.48579e-11	0.000413422
664	3.68486e-09	1.77248e-10	1.47707e-11	0.000245658
665	1.00495e-08	4.83397e-10	4.02831e-11	0.000669965
666	5.79245e-09	2.78627e-10	2.32189e-11	0.000386164
667	1.0516e-08	5.0584e-10	4.21533e-11	0.000701069
668	5.7199e-09	2.75137e-10	2.29281e-11	0.000381326
669	2.97829e-09	1.43261e-10	1.19384e-11	0.000198553
670	3.67415e-09	1.76733e-10	1.47278e-11	0.000244943
671	9.82844e-09	4.72765e-10	3.93971e-11	0.000655229
672	6.26079e-09	3.01155e-10	2.50962e-11	0.000417386
673	1.09965e-08	5.2895e-10	4.40791e-11	0.000733098
674	7.05759e-09	3.39482e-10	2.82902e-11	0.000470506
675	1.00773e-08	4.84735e-10	4.03945e-11	0.000671818
676	5.44513e-09	2.6192e-10	2.18267e-11	0.000363009
677	9.86883e-09	4.74708e-10	3.9559e-11	0.000657922
678	9.34079e-09	4.49308e-10	3.74424e-11	0.000622719
679	2.04293e-08	9.82688e-10	8.18906e-11	0.00136196
680	6.36827e-09	3.06325e-10	2.55271e-11	0.000424551
681	8.07518e-09	3.8843e-10	3.23692e-11	0.000538345
682	1.48303e-08	7.13364e-10	5.9447e-11	0.000988688
683	2.40366e-08	1.1562e-09	9.635e-11	0.00160244
684	1.05906e-08	5.09426e-10	4.24522e-11	0.000706039
685	4.9851e-09	2.39792e-10	1.99827e-11	0.00033234
686	2.40858e-09	1.15857e-10	9.65476e-12	0.000160572
687	4.948e-09	2.38008e-10	1.9834e-11	0.000329867
688	7.71763e-09	3.71231e-10	3.0936e-11	0.000514509
689	7.2242e-09	3.47497e-10	2.89581e-11	0.000481613
690	4.27264e-09	2.05522e-10	1.71268e-11	0.000284843
691	4.03121e-09	1.93908e-10	1.6159e-11	0.000268747
692	6.77807e-09	3.26037e-10	2.71697e-11	0.000451871
693	7.12931e-09	3.42932e-10	2.85777e-11	0.000475287
694	6.81658e-09	3.2789e-10	2.73241e-11	0.000454439
695	7.20977e-09	3.46803e-10	2.89002e-11	0.000480651
696	1.30291e-08	6.2672e-10	5.22267e-11	0.000868604
697	7.23487e-09	3.4801e-10	2.90008e-11	0.000482324
698	6.42443e-09	3.09027e-10	2.57522e-11	0.000428296
699	1.22271e-08	5.88147e-10	4.90123e-11	0.000815143
700	6.13435e-09	2.95073e-10	2.45894e-11	0.000408957
701	4.26115e-09	2.04969e-10	1.70808e-11	0.000284077
702	5.90662e-09	2.84119e-10	2.36766e-11	0.000393774
703	4.79173e-09	2.30491e-10	1.92075e-11	0.000319448
704	4.55607e-09	2.19155e-10	1.82629e-11	0.000303738
705	5.93588e-09	2.85527e-10	2.37939e-11	0.000395726
706	8.07416e-09	3.88381e-10	3.23651e-11	0.000538277
707	4.84245e-09	2.32931e-10	1.94109e-11	0.00032283
708	5.12003e-09	2.46282e-10	2.05235e-11	0.000341335
709	7.45801e-09	3.58743e-10	2.98953e-11	0.0004972
710	6.24182e-09	3.00243e-10	2.50202e-11	0.000416122
711	6.53012e-09	3.1411e-10	2.61759e-11	0.000435341
712	4.13803e-09	1.99046e-10	1.65872e-11	0.000275868
713	5.5191e-09	2.65478e-10	2.21232e-11	0.00036794
714	3.32505e-09	1.59941e-10	1.33284e-11	0.00022167
715	4.70437e-09	2.26289e-10	1.88574e-11	0.000313625
716	1.20004e-08	5.77241e-10	4.81034e-11	0.000800027
717	6.3095e-09	3.03498e-10	2.52915e-11	0.000420634
718	4.27729e-09	2.05745e-10	1.71454e-11	0.000285153
719	6.95019e-09	3.34316e-10	2.78597e-11	0.000463346
720	1.08972e-08	5.24175e-10	4.36812e-11	0.00072648
721	5.5225e-09	2.65642e-10	2.21368e-11	0.000368166
722	8.13737e-09	3.91422e-10	3.26185e-11	0.000542491
723	7.71159e-09	3.70941e-10	3.09118e-11	0.000514106
724	1.11856e-08	5.38047e-10	4.48373e-11	0.000745707
725	6.92784e-09	3.33241e-10	2.77701e-11	0.000461856
726	4.58981e-09	2.20778e-10	1.83982e-11	0.000305988
727	9.77507e-09	4.70198e-10	3.91832e-11	0.000651672
728	1.77478e-08	8.53702e-10	7.11418e-11	0.00118319
729	2.27963e-09	1.09654e-10	9.13787e-12	0.000151976
730	8.45833e-09	4.06861e-10	3.39051e-11	0.000563889
731	4.20423e-09	2.02231e-10	1.68526e-11	0.000280282
732	9.34515e-09	4.49518e-10	3.74599e-11	0.00062301
733	4.77624e-09	2.29746e-10	1.91455e-11	0.000318416
734	5.55312e-09	2.67115e-10	2.22596e-11	0.000370208
735	9.10196e-09	4.3782e-10	3.6485e-11	0.000606797
736	4.99789e-09	2.40407e-10	2.00339e-11	0.000333193
737	1.41272e-08	6.79542e-10	5.66285e-11	0.000941811
738	1.1759e-08	5.65631e-10	4.71359e-11	0.000783936
739	6.33426e-09	3.04689e-10	2.53908e-11	0.000422284
740	3.51944e-09	1.69291e-10	1.41076e-11	0.000234629
741	6.34547e-09	3.05228e-10	2.54357e-11	0.000423031
742	6.82452e-09	3.28272e-10	2.7356e-11	0.000454968
743	3.3477e-09	1.6103e-10	1.34192e-11	0.00022318
744	5.6798e-09	2.73208e-10	2.27674e-11	0.000378653
745	9.93593e-09	4.77936e-10	3.9828e-11	0.000662395
746	1.25924e-08	6.05717e-10	5.04764e-11	0.000839494
747	1.37527e-08	6.61531e-10	5.51275e-11	0.000916849
748	5.8455e-09	2.81179e-10	2.34316e-11	0.0003897
749	5.35608e-09	2.57637e-10	2.14697e-11	0.000357072
750	7.92614e-09	3.81261e-10	3.17718e-11	0.000528409
751	6.95023e-09	3.34318e-10	2.78599e-11	0.000463349
752	6.5693e-09	3.15995e-10	2.63329e-11	0.000437953
753	3.43875e-09	1.6541e-10	1.37841e-11	0.00022925
754	4.77479e-09	2.29676e-10	1.91396e-11	0.000318319
755	6.98514e-09	3.35998e-10	2.79998e-11	0.000465676
756	4.77283e-09	2.29581e-10	1.91318e-11	0.000318188
757	1.1814e-08	5.68276e-10	4.73563e-11	0.000787602
758	9.93331e-09	4.7781e-10	3.98175e-11	0.000662221
759	7.20368e-09	3.4651e-10	2.88758e-11	0.000480245
760	3.79812e-09	1.82696e-10	1.52247e-11	0.000253208
761	7.56709e-09	3.6399e-10	3.03325e-11	0.000504473
762	7.90494e-09	3.80241e-10	3.16868e-11	0.000526996
763	5.93725e-09	2.85592e-10	2.37993e-11	0.000395816
764	1.13854e-08	5.47658e-10	4.56382e-11	0.000759027
765	4.30703e-09	2.07176e-10	1.72646e-11	0.000287135
766	1.25946e-08	6.05824e-10	5.04853e-11	0.000839642
767	5.80492e-09	2.79227e-10	2.32689e-11	0.000386995
768	8.1679e-09	3.9289e-10	3.27408e-11	0.000544526
769	4.01998e-09	1.93368e-10	1.6114e-11	0.000267999
770	4.02127e-09	1.9343e-10	1.61192e-11	0.000268084
771	4.37667e-09	2.10526e-10	1.75438e-11	0.000291778
772	5.00975e-09	2.40978e-10	2.00815e-11	0.000333983
773	3.75079e-09	1.80419e-10	1.50349e-11	0.000250052
774	5.15532e-09	2.4798e-10	2.0665e-11	0.000343688
775	8.9241e-09	4.29265e-10	3.57721e-11	0.00059494
776	6.44848e-09	3.10183e-10	2.58486e-11	0.000429899
777	9.10422e-09	4.37929e-10	3.64941e-11	0.000606948
778	3.69731e-09	1.77847e-10	1.48206e-11	0.000246487
779	8.09462e-09	3.89365e-10	3.24471e-11	0.000539641
780	7.94985e-09	3.82402e-10	3.18668e-11	0.00052999
781	3.40362e-09	1.6372e-10	1.36433e-11	0.000226908
782	3.08031e-09	1.48168e-10	1.23474e-11	0.000205354
783	1.02351e-08	4.92325e-10	4.10271e-11	0.000682338
784	3.38625e-09	1.62885e-10	1.35737e-11	0.00022575
785	8.46921e-09	4.07384e-10	3.39487e-11	0.000564614
786	8.87771e-09	4.27033e-10	3.55861e-11	0.000591847
787	7.08356e-09	3.40731e-10	2.83943e-11	0.000472237
788	1.04936e-08	5.0476e-10	4.20634e-11	0.000699573
789	7.91708e-09	3.80826e-10	3.17355e-11	0.000527806
790	9.12448e-09	4.38904e-10	3.65753e-11	0.000608299
791	1.11234e-08	5.35054e-10	4.45879e-11	0.000741559
792	7.84092e-09	3.77162e-10	3.14302e-11	0.000522728
793	4.20027e-09	2.0204e-10	1.68367e-11	0.000280018
794	1.25728e-08	6.04775e-10	5.03979e-11	0.000838188
795	5.27774e-09	2.53868e-10	2.11557e-11	0.000351849
796	8.25869e-09	3.97258e-10	3.31048e-11	0.00055058
797	5.96836e-09	2.87089e-10	2.3924e-11	0.000397891
798	9.77315e-09	4.70106e-10	3.91755e-11	0.000651543
799	4.2019e-09	2.02119e-10	1.68432e-11	0.000280127
800	4.31621e-09	2.07617e-10	1.73014e-11	0.000287747
801	7.33785e-09	3.52963e-10	2.94136e-11	0.00048919
802	9.95487e-09	4.78847e-10	3.99039e-11	0.000663658
803	1.52315e-08	7.32663e-10	6.10552e-11	0.00101543
804	6.0981e-09	2.93329e-10	2.44441e-11	0.00040654
805	6.72794e-09	3.23626e-10	2.69688e-11	0.000448529
806	6.33299e-09	3.04628e-10	2.53857e-11	0.000422199
807	7.03452e-09	3.38373e-10	2.81977e-11	0.000468968
808	4.73045e-09	2.27543e-10	1.89619e-11	0.000315364
809	7.63432e-09	3.67224e-10	3.0602e-11	0.000508954
810	1.20206e-08	5.7821e-10	4.81842e-11	0.00080137
811	4.46733e-09	2.14886e-10	1.79072e-11	0.000297822
812	3.15529e-09	1.51775e-10	1.26479e-11	0.000210353
813	1.19045e-08	5.72628e-10	4.7719e-11	0.000793634
814	7.49591e-09	3.60567e-10	3.00472e-11	0.000499728
815	5.82755e-09	2.80315e-10	2.33596e-11	0.000388503
816	7.30904e-09	3.51578e-10	2.92981e-11	0.000487269
817	8.19622e-09	3.94253e-10	3.28544e-11	0.000546415
818	1.0308e-08	4.95831e-10	4.13192e-11	0.000687197
819	5.85126e-09	2.81456e-10	2.34547e-11	0.000390084
820	8.56639e-09	4.12058e-10	3.43382e-11	0.000571093
821	5.9512e-09	2.86263e-10	2.38553e-11	0.000396747
822	9.6385e-09	4.63629e-10	3.86357e-11	0.000642566
823	3.38856e-09	1.62996e-10	1.3583e-11	0.000225904
824	7.80754e-09	3.75556e-10	3.12964e-11	0.000520503
825	1.05882e-08	5.09313e-10	4.24427e-11	0.000705882
826	1.39197e-08	6.69561e-10	5.57967e-11	0.000927978
827	8.06785e-09	3.88078e-10	3.23398e-11	0.000537856
828	1.17426e-08	5.64841e-10	4.70701e-11	0.000782841
829	2.45318e-08	1.18002e-09	9.83354e-11	0.00163546
830	3.4843e-09	1.67601e-10	1.39667e-11	0.000232287
831	6.94639e-09	3.34133e-10	2.78445e-11	0.000463092
832	6.3159e-09	3.03806e-10	2.53172e-11	0.00042106
833	1.03015e-08	4.95522e-10	4.12935e-11	0.000686769
834	1.3542e-08	6.51396e-10	5.4283e-11	0.000902802
835	7.2436e-09	3.4843e-10	2.90358e-11	0.000482906
836	8.39209e-09	4.03674e-10	3.36395e-11	0.000559472
837	7.94168e-09	3.82009e-10	3.18341e-11	0.000529446
838	5.91601e-09	2.84571e-10	2.37142e-11	0.000394401
839	8.57361e-09	4.12406e-10	3.43671e-11	0.000571574
840	4.56351e-09	2.19513e-10	1.82928e-11	0.000304234
841	5.40931e-09	2.60197e-10	2.16831e-11	0.00036062
842	5.92429e-09	2.84969e-10	2.37474e-11	0.000394952
843	7.81478e-09	3.75905e-10	3.13254e-11	0.000520985
844	1.26654e-08	6.09229e-10	5.07691e-11	0.000844361
845	7.83714e-09	3.7698e-10	3.1415e-11	0.000522476
846	5.3741e-09	2.58503e-10	2.1542e-11	0.000358273
847	9.4779e-09	4.55904e-10	3.7992e-11	0.00063186
848	9.29659e-09	4.47182e-10	3.72652e-11	0.000619773
849	6.07603e-09	2.92268e-10	2.43556e-11	0.000405069
850	8.83308e-09	4.24887e-10	3.54072e-11	0.000588872
851	5.72293e-09	2.75283e-10	2.29402e-11	0.000381528
852	5.40006e-09	2.59752e-10	2.1646e-11	0.000360004
853	1.42107e-08	6.83561e-10	5.69634e-11	0.000947382
854	9.73453e-09	4.68248e-10	3.90207e-11	0.000648969
855	6.91689e-09	3.32715e-10	2.77262e-11	0.000461126
856	4.81255e-09	2.31492e-10	1.9291e-11	0.000320836
857	1.10899e-08	5.33444e-10	4.44537e-11	0.000739327
858	1.12751e-08	5.42354e-10	4.51962e-11	0.000751676
859	3.77107e-09	1.81395e-10	1.51163e-11	0.000251405
860	1.12744e-08	5.42318e-10	4.51932e-11	0.000751626
861	5.90243e-09	2.83917e-10	2.36598e-11	0.000393496
862	5.57102e-09	2.67976e-10	2.23313e-11	0.000371401
863	4.74021e-09	2.28013e-10	1.9001e-11	0.000316014
864	5.16162e-09	2.48283e-10	2.06903e-11	0.000344108
865	9.50679e-09	4.57293e-10	3.81078e-11	0.000633786
866	3.462e-09	1.66528e-10	1.38774e-11	0.0002308
867	5.54758e-09	2.66848e-10	2.22374e-11	0.000369839
868	8.19024e-09	3.93965e-10	3.28304e-11	0.000546016
869	7.33958e-09	3.53047e-10	2.94206e-11	0.000489306
870	9.73769e-09	4.684e-10	3.90334e-11	0.00064918
871	8.07535e-09	3.88438e-10	3.23699e-11	0.000538356
872	7.94823e-09	3.82324e-10	3.18603e-11	0.000529882
873	1.21656e-08	5.85187e-10	4.87656e-11	0.000811041
874	7.64297e-09	3.6764e-10	3.06367e-11	0.000509531
875	6.45968e-09	3.10722e-10	2.58935e-11	0.000430645
876	5.83507e-09	2.80677e-10	2.33898e-11	0.000389005
877	1.27134e-08	6.11535e-10	5.09612e-11	0.000847557
878	5.11782e-09	2.46176e-10	2.05147e-11	0.000341188
879	2.76303e-09	1.32907e-10	1.10756e-11	0.000184202
880	9.09906e-09	4.37681e-10	3.64734e-11	0.000606604
881	8.73665e-09	4.20248e-10	3.50207e-11	0.000582443
882	5.08219e-09	2.44462e-10	2.03718e-11	0.000338812
883	7.63222e-09	3.67123e-10	3.05936e-11	0.000508815
884	2.30755e-09	1.10997e-10	9.24977e-12	0.000153837
885	8.45825e-09	4.06857e-10	3.39047e-11	0.000563883
886	8.35454e-09	4.01868e-10	3.3489e-11	0.000556969
887	1.14532e-08	5.50921e-10	4.59101e-11	0.00076355
888	7.72115e-09	3.71401e-10	3.09501e-11	0.000514743
889	1.03097e-08	4.95914e-10	4.13262e-11	0.000687313
890	1.5493e-08	7.45241e-10	6.21034e-11	0.00103287
891	4.30247e-09	2.06956e-10	1.72464e-11	0.000286831
892	2.49832e-09	1.20174e-10	1.00145e-11	0.000166555
893	4.96314e-09	2.38736e-10	1.98947e-11	0.000330876
894	6.88598e-09	3.31228e-10	2.76023e-11	0.000459066
895	8.26111e-09	3.97374e-10	3.31145e-11	0.000550741
896	7.94586e-09	3.8221e-10	3.18508e-11	0.000529724
897	5.00155e-09	2.40583e-10	2.00486e-11	0.000333437
898	3.94322e-09	1.89676e-10	1.58063e-11	0.000262881
899	6.44414e-09	3.09975e-10	2.58312e-11	0.00042961
900	6.46043e-09	3.10758e-10	2.58965e-11	0.000430695
901	8.14418e-09	3.9175e-10	3.26458e-11	0.000542946
902	9.88552e-09	4.75511e-10	3.96259e-11	0.000659035
903	3.89234e-09	1.87228e-10	1.56024e-11	0.000259489
904	6.15e-09	2.95826e-10	2.46522e-11	0.00041
905	4.67662e-09	2.24954e-10	1.87461e-11	0.000311775
906	1.5796e-08	7.59815e-10	6.33179e-11	0.00105307
907	4.07141e-09	1.95842e-10	1.63202e-11	0.000271428
908	5.36635e-09	2.58131e-10	2.15109e-11	0.000357757
909	8.37621e-09	4.0291e-10	3.35759e-11	0.000558414
910	8.29949e-09	3.9922e-10	3.32683e-11	0.000553299
911	5.3657e-09	2.581e-10	2.15083e-11	0.000357713
912	8.03644e-09	3.86567e-10	3.22139e-11	0.000535763
913	5.81121e-09	2.7953e-10	2.32941e-11	0.000387414
914	8.38692e-09	4.03425e-10	3.36188e-11	0.000559128
915	7.71865e-09	3.71281e-10	3.09401e-11	0.000514577
916	3.30659e-09	1.59053e-10	1.32544e-11	0.000220439
917	1.03365e-08	4.97204e-10	4.14336e-11	0.0006891
918	2.61662e-09	1.25864e-10	1.04887e-11	0.000174441
919	6.82597e-09	3.28341e-10	2.73618e-11	0.000455065
920	7.55139e-09	3.63235e-10	3.02696e-11	0.000503426
921	5.67958e-09	2.73198e-10	2.27665e-11	0.000378639
922	7.93542e-09	3.81708e-10	3.1809e-11	0.000529028
923	9.75156e-09	4.69067e-10	3.90889e-11	0.000650104
924	6.67333e-09	3.20999e-10	2.67499e-11	0.000444889
925	1.02739e-08	4.94191e-10	4.11826e-11	0.000684924
926	1.17247e-08	5.6398e-10	4.69983e-11	0.000781648
927	4.27156e-09	2.0547e-10	1.71225e-11	0.000284771
928	5.59594e-09	2.69175e-10	2.24312e-11	0.000373063
929	7.67277e-09	3.69074e-10	3.07561e-11	0.000511518
930	9.51869e-09	4.57866e-10	3.81555e-11	0.000634579
931	7.15688e-09	3.44258e-10	2.86882e-11	0.000477125
932	7.71199e-09	3.7096e-10	3.09134e-11	0.000514133
933	1.0401e-08	5.00308e-10	4.16924e-11	0.000693403
934	9.59482e-09	4.61528e-10	3.84606e-11	0.000639654
935	7.52418e-09	3.61926e-10	3.01605e-11	0.000501612
936	6.18919e-09	2.97711e-10	2.48092e-11	0.000412613
937	4.08418e-09	1.96456e-10	1.63714e-11	0.000272279
938	6.77749e-09	3.26009e-10	2.71674e-11	0.000451833
939	5.128e-09	2.46666e-10	2.05555e-11	0.000341867
940	4.15563e-09	1.99893e-10	1.66577e-11	0.000277042
941	1.49748e-08	7.20317e-10	6.00264e-11	0.000998323
942	4.8538e-09	2.33476e-10	1.94564e-11	0.000323587
943	3.28751e-09	1.58135e-10	1.31779e-11	0.000219167
944	6.22766e-09	2.99561e-10	2.49634e-11	0.000415177
945	1.04654e-08	5.03407e-10	4.19505e-11	0.000697697
946	1.0194e-08	4.90348e-10	4.08624e-11	0.000679598
947	4.8606e-09	2.33803e-10	1.94836e-11	0.00032404
948	4.81336e-09	2.31531e-10	1.92942e-11	0.00032089
949	9.11807e-09	4.38595e-10	3.65496e-11	0.000607871
950	7.36158e-09	3.54105e-10	2.95088e-11	0.000490772
951	4.63684e-09	2.2304e-10	1.85867e-11	0.000309122
952	5.65495e-09	2.72013e-10	2.26678e-11	0.000376997
953	4.61118e-09	2.21806e-10	1.84838e-11	0.000307412
954	5.86589e-09	2.82159e-10	2.35133e-11	0.000391059
955	3.14436e-09	1.51249e-10	1.26041e-11	0.000209624
956	9.25609e-09	4.45234e-10	3.71028e-11	0.000617073
957	6.59205e-09	3.17089e-10	2.64241e-11	0.00043947
958	9.57333e-09	4.60494e-10	3.83745e-11	0.000638222
959	1.17108e-08	5.63308e-10	4.69424e-11	0.000780718
960	8.80311e-09	4.23445e-10	3.52871e-11	0.000586874
961	1.24058e-08	5.96739e-10	4.97282e-11	0.00082705
962	3.10276e-09	1.49248e-10	1.24374e-11	0.000206851
963	4.63524e-09	2.22963e-10	1.85803e-11	0.000309016
964	8.51249e-09	4.09466e-10	3.41221e-11	0.000567499
965	7.57428e-09	3.64336e-10	3.03613e-11	0.000504952
966	5.49871e-09	2.64498e-10	2.20415e-11	0.000366581
967	5.21595e-09	2.50897e-10	2.09081e-11	0.00034773
968	6.54826e-09	3.14983e-10	2.62486e-11	0.000436551
969	7.94212e-09	3.8203e-10	3.18358e-11	0.000529475
970	8.06793e-09	3.88081e-10	3.23401e-11	0.000537862
971	5.49595e-09	2.64365e-10	2.20304e-11	0.000366397
972	5.4195e-09	2.60688e-10	2.1724e-11	0.0003613
973	7.05667e-09	3.39438e-10	2.82865e-11	0.000470444
974	9.60792e-09	4.62158e-10	3.85132e-11	0.000640528
975	4.57311e-09	2.19975e-10	1.83312e-11	0.000304874
976	5.37876e-09	2.58728e-10	2.15606e-11	0.000358584
977	4.04266e-09	1.94459e-10	1.62049e-11	0.00026951
978	5.43649e-09	2.61505e-10	2.17921e-11	0.000362432
979	4.0669e-09	1.95625e-10	1.63021e-11	0.000271127
980	1.07377e-08	5.16502e-10	4.30418e-11	0.000715846
981	1.00415e-08	4.83012e-10	4.0251e-11	0.00066943
982	1.254e-08	6.03194e-10	5.02661e-11	0.000835997
983	5.6067e-09	2.69692e-10	2.24743e-11	0.00037378
984	7.43476e-09	3.57625e-10	2.98021e-11	0.000495651
985	6.61378e-09	3.18134e-10	2.65112e-11	0.000440919
986	4.11324e-09	1.97854e-10	1.64878e-11	0.000274216
987	7.21695e-09	3.47148e-10	2.8929e-11	0.00048113
988	9.38874e-09	4.51615e-10	3.76346e-11	0.000625916
989	8.7826e-09	4.22458e-10	3.52049e-11	0.000585507
990	2.68546e-09	1.29175e-10	1.07646e-11	0.000179031
991	5.93823e-09	2.8564e-10	2.38033e-11	0.000395882
992	6.85188e-09	3.29587e-10	2.74656e-11	0.000456792
993	7.15578e-09	3.44206e-10	2.86838e-11	0.000477052
994	6.05112e-09	2.9107e-10	2.42558e-11	0.000403408
995	8.2872e-09	3.98629e-10	3.32191e-11	0.00055248
996	9.01717e-09	4.33742e-10	3.61451e-11	0.000601144
997	3.09828e-09	1.49033e-10	1.24194e-11	0.000206552
998	8.33036e-09	4.00705e-10	3.33921e-11	0.000555357
999	1.06029e-08	5.10017e-10	4.25015e-11	0.000706859
1000	1.0091e-08	4.85396e-10	4.04497e-11	0.000672735
1001	1.34553e-08	6.47225e-10	5.39354e-11	0.000897022
1002	9.86224e-09	4.74391e-10	3.95326e-11	0.000657483
1003	4.3435e-09	2.0893e-10	1.74108e-11	0.000289566
1004	7.24655e-09	3.48572e-10	2.90477e-11	0.000483104
1005	5.20521e-09	2.5038e-10	2.0865e-11	0.000347014
1006	1.11617e-08	5.36899e-10	4.47416e-11	0.000744116
1007	1.35135e-08	6.50022e-10	5.41685e-11	0.000900898
1008	7.58066e-09	3.64643e-10	3.03869e-11	0.000505377
1009	5.28764e-09	2.54345e-10	2.11954e-11	0.000352509
1010	7.66735e-09	3.68813e-10	3.07344e-11	0.000511156
1011	5.90177e-09	2.83886e-10	2.36571e-11	0.000393451
1012	1.44086e-08	6.93078e-10	5.77565e-11	0.000960573
1013	5.74217e-09	2.76208e-10	2.30174e-11	0.000382811
1014	7.80277e-09	3.75327e-10	3.12773e-11	0.000520185
1015	4.25176e-09	2.04517e-10	1.70431e-11	0.00028345
1016	8.53083e-09	4.10348e-10	3.41957e-11	0.000568722
1017	4.5029e-09	2.16597e-10	1.80498e-11	0.000300193
1018	8.14533e-09	3.91805e-10	3.26504e-11	0.000543022
1019	5.31491e-09	2.55657e-10	2.13047e-11	0.000354327
1020	1.06832e-08	5.13882e-10	4.28235e-11	0.000712215
1021	6.25939e-09	3.01088e-10	2.50906e-11	0.000417292
1022	7.03619e-09	3.38453e-10	2.82044e-11	0.000469079
1023	1.08595e-08	5.22361e-10	4.35301e-11	0.000723967
1024	5.25075e-09	2.5257e-10	2.10475e-11	0.00035005
1025	1.07825e-08	5.18656e-10	4.32213e-11	0.000718831
1026	8.27161e-09	3.97879e-10	3.31566e-11	0.00055144
1027	6.66628e-09	3.2066e-10	2.67216e-11	0.000444419
1028	7.41405e-09	3.56629e-10	2.97191e-11	0.00049427
1029	7.04361e-09	3.3881e-10	2.82342e-11	0.000469574
1030	4.57452e-09	2.20042e-10	1.83369e-11	0.000304968
1031	7.72912e-09	3.71784e-10	3.0982e-11	0.000515275
1032	5.22377e-09	2.51272e-10	2.09394e-11	0.000348251
1033	9.08062e-09	4.36794e-10	3.63995e-11	0.000605375
1034	8.72337e-09	4.19609e-10	3.49674e-11	0.000581558
1035	1.18353e-08	5.693e-10	4.74417e-11	0.000789021
1036	4.75075e-09	2.2852e-10	1.90433e-11	0.000316717
1037	1.63808e-08	7.87947e-10	6.56622e-11	0.00109206
1038	6.5805e-09	3.16533e-10	2.63778e-11	0.0004387
1039	7.85764e-09	3.77966e-10	3.14972e-11	0.000523842
1040	1.26365e-08	6.07839e-10	5.06533e-11	0.000842435
1041	4.44696e-09	2.13907e-10	1.78255e-11	0.000296464
1042	3.98213e-09	1.91547e-10	1.59623e-11	0.000265475
1043	4.20452e-09	2.02245e-10	1.68537e-11	0.000280301
1044	7.41722e-09	3.56781e-10	2.97318e-11	0.000494481
1045	9.60358e-09	4.61949e-10	3.84957e-11	0.000640238
1046	5.53872e-09	2.66422e-10	2.22019e-11	0.000369248
1047	4.50403e-09	2.16652e-10	1.80543e-11	0.000300269
1048	5.05894e-09	2.43344e-10	2.02787e-11	0.000337263
1049	7.70777e-09	3.70757e-10	3.08965e-11	0.000513852
1050	5.81796e-09	2.79854e-10	2.33212e-11	0.000387864
1051	8.6716e-09	4.17119e-10	3.47599e-11	0.000578106
1052	6.1605e-09	2.96331e-10	2.46942e-11	0.0004107
1053	1.00156e-08	4.81766e-10	4.01472e-11	0.000667704
1054	5.4772e-09	2.63463e-10	2.19552e-11	0.000365147
1055	4.49104e-09	2.16027e-10	1.80023e-11	0.000299403
1056	1.22592e-08	5.89687e-10	4.91406e-11	0.000817278
1057	8.3424e-09	4.01284e-10	3.34403e-11	0.00055616
1058	5.06463e-09	2.43618e-10	2.03015e-11	0.000337642
1059	8.27777e-09	3.98175e-10	3.31813e-11	0.000551852
1060	7.99083e-09	3.84373e-10	3.20311e-11	0.000532722
1061	2.8647e-09	1.37797e-10	1.14831e-11	0.00019098
1062	1.31541e-08	6.32738e-10	5.27281e-11	0.000876943
1063	7.54897e-09	3.63119e-10	3.02599e-11	0.000503264
1064	5.73092e-09	2.75667e-10	2.29723e-11	0.000382062
1065	4.15904e-09	2.00057e-10	1.66714e-11	0.00027727
1066	6.40424e-09	3.08055e-10	2.56713e-11	0.00042695
1067	1.09966e-08	5.28954e-10	4.40795e-11	0.000733104
1068	3.62093e-09	1.74173e-10	1.45144e-11	0.000241395
1069	3.62784e-09	1.74506e-10	1.45421e-11	0.000241856
1070	3.71786e-09	1.78835e-10	1.4903e-11	0.000247857
1071	6.99396e-09	3.36422e-10	2.80352e-11	0.000466264
1072	5.3131e-09	2.55569e-10	2.12975e-11	0.000354207
1073	5.23415e-09	2.51772e-10	2.0981e-11	0.000348943
1074	5.79251e-09	2.7863e-10	2.32192e-11	0.000386167
1075	2.1036e-08	1.01187e-09	8.43226e-11	0.0014024
1076	3.49042e-09	1.67895e-10	1.39913e-11	0.000232695
1077	1.0751e-08	5.1714e-10	4.3095e-11	0.000716731
1078	8.51571e-09	4.09621e-10	3.4135e-11	0.000567714
1079	5.9378e-09	2.85619e-10	2.38016e-11	0.000395854
1080	5.00966e-09	2.40974e-10	2.00811e-11	0.000333978
1081	5.01612e-09	2.41284e-10	2.0107e-11	0.000334408
1082	9.74498e-09	4.68751e-10	3.90626e-11	0.000649665
1083	7.26322e-09	3.49374e-10	2.91145e-11	0.000484215
1084	5.84536e-09	2.81172e-10	2.3431e-11	0.000389691
1085	1.45264e-08	6.98746e-10	5.82288e-11	0.000968427
1086	1.37581e-08	6.61791e-10	5.51493e-11	0.00091721
1087	6.46214e-09	3.1084e-10	2.59034e-11	0.00043081
1088	1.39606e-08	6.71531e-10	5.59609e-11	0.000930709
1089	3.65613e-09	1.75866e-10	1.46555e-11	0.000243742
1090	6.78641e-09	3.26438e-10	2.72032e-11	0.000452428
1091	6.82275e-09	3.28186e-10	2.73488e-11	0.00045485
1092	4.69984e-09	2.26071e-10	1.88392e-11	0.000313323
1093	7.89136e-09	3.79588e-10	3.16324e-11	0.000526091
1094	7.21166e-09	3.46893e-10	2.89078e-11	0.000480777
1095	3.35372e-09	1.6132e-10	1.34433e-11	0.000223581
1096	3.44208e-09	1.6557e-10	1.37975e-11	0.000229472
1097	4.05951e-09	1.95269e-10	1.62724e-11	0.000270634
1098	4.83744e-09	2.3269e-10	1.93908e-11	0.000322496
1099	5.54715e-09	2.66828e-10	2.22357e-11	0.00036981
1100	5.76679e-09	2.77393e-10	2.31161e-11	0.000384453
1101	1.14263e-08	5.49626e-10	4.58022e-11	0.000761754
1102	6.67283e-09	3.20975e-10	2.67479e-11	0.000444855
1103	1.01902e-08	4.90168e-10	4.08474e-11	0.000679349
1104	4.82918e-09	2.32292e-10	1.93577e-11	0.000321945
1105	4.55706e-09	2.19203e-10	1.82669e-11	0.000303804
1106	3.40998e-09	1.64026e-10	1.36688e-11	0.000227332
1107	6.94109e-09	3.33878e-10	2.78232e-11	0.000462739
1108	8.73993e-09	4.20406e-10	3.50338e-11	0.000582662
1109	4.98964e-09	2.40011e-10	2.00009e-11	0.000332643
1110	5.38735e-09	2.59141e-10	2.15951e-11	0.000359156
1111	7.65227e-09	3.68088e-10	3.0674e-11	0.000510151
1112	6.90193e-09	3.31995e-10	2.76663e-11	0.000460129
1113	5.19156e-09	2.49723e-10	2.08103e-11	0.000346104
1114	5.85352e-09	2.81564e-10	2.34637e-11	0.000390234
1115	4.91349e-09	2.36347e-10	1.96956e-11	0.000327566
1116	6.00777e-09	2.88984e-10	2.4082e-11	0.000400518
1117	6.64972e-09	3.19863e-10	2.66553e-11	0.000443314
1118	5.36689e-09	2.58157e-10	2.15131e-11	0.000357793
1119	5.94818e-09	2.86118e-10	2.38432e-11	0.000396545
1120	6.3735e-09	3.06577e-10	2.55481e-11	0.0004249
1121	4.40036e-09	2.11665e-10	1.76388e-11	0.000293357
1122	1.44716e-08	6.96109e-10	5.80091e-11	0.000964773
1123	8.42715e-09	4.05361e-10	3.37801e-11	0.00056181
1124	1.02656e-08	4.93794e-10	4.11495e-11	0.000684375
1125	3.51204e-09	1.68935e-10	1.40779e-11	0.000234136
1126	5.33849e-09	2.56791e-10	2.13992e-11	0.0003559
1127	7.81663e-09	3.75994e-10	3.13328e-11	0.000521109
1128	1.01025e-08	4.85946e-10	4.04955e-11	0.000673497
1129	7.17677e-09	3.45215e-10	2.87679e-11	0.000478451
1130	8.86748e-09	4.26541e-10	3.55451e-11	0.000591165
1131	2.40307e-08	1.15592e-09	9.63266e-11	0.00160205
1132	1.06275e-08	5.11203e-10	4.26003e-11	0.000708502
1133	4.47987e-09	2.1549e-10	1.79575e-11	0.000298658
1134	6.44662e-09	3.10094e-10	2.58411e-11	0.000429774
1135	4.42753e-09	2.12972e-10	1.77477e-11	0.000295169
1136	7.49242e-09	3.60399e-10	3.00332e-11	0.000499495
1137	4.80677e-09	2.31214e-10	1.92678e-11	0.000320451
1138	1.02648e-08	4.93755e-10	4.11462e-11	0.00068432
1139	1.01264e-08	4.87097e-10	4.05914e-11	0.000675092
1140	1.1407e-08	5.48696e-10	4.57247e-11	0.000760465
1141	5.89819e-09	2.83713e-10	2.36428e-11	0.000393212
1142	3.23224e-09	1.55476e-10	1.29564e-11	0.000215483
1143	6.32984e-09	3.04477e-10	2.5373e-11	0.000421989
1144	7.76576e-09	3.73547e-10	3.11289e-11	0.000517717
1145	4.02892e-09	1.93798e-10	1.61499e-11	0.000268595
1146	5.64748e-09	2.71654e-10	2.26378e-11	0.000376499
1147	8.11519e-09	3.90355e-10	3.25296e-11	0.000541012
1148	3.87428e-09	1.8636e-10	1.553e-11	0.000258286
1149	1.09182e-08	5.25184e-10	4.37653e-11	0.000727879
1150	4.08045e-09	1.96277e-10	1.63564e-11	0.00027203
1151	7.69334e-09	3.70063e-10	3.08386e-11	0.000512889
1152	3.23251e-09	1.55489e-10	1.29574e-11	0.0002155
1153	1.05764e-08	5.08744e-10	4.23954e-11	0.000705095
1154	4.78888e-09	2.30354e-10	1.91961e-11	0.000319259
1155	6.31549e-09	3.03786e-10	2.53155e-11	0.000421033
1156	5.33735e-09	2.56736e-10	2.13946e-11	0.000355823
1157	2.74196e-08	1.31893e-09	1.09911e-10	0.00182797
1158	3.06163e-09	1.4727e-10	1.22725e-11	0.000204109
1159	2.21239e-09	1.0642e-10	8.86832e-12	0.000147493
1160	8.42478e-09	4.05247e-10	3.37706e-11	0.000561652
1161	7.47269e-09	3.5945e-10	2.99541e-11	0.000498179
1162	6.63231e-09	3.19026e-10	2.65855e-11	0.000442154
1163	3.42215e-09	1.64612e-10	1.37176e-11	0.000228144
1164	1.06594e-08	5.12736e-10	4.2728e-11	0.000710627
1165	2.96005e-09	1.42384e-10	1.18653e-11	0.000197337
1166	8.44055e-09	4.06005e-10	3.38338e-11	0.000562703
1167	6.62391e-09	3.18622e-10	2.65518e-11	0.000441594
1168	7.86259e-09	3.78205e-10	3.1517e-11	0.000524173
1169	8.13767e-09	3.91436e-10	3.26197e-11	0.000542511
1170	7.79654e-09	3.75027e-10	3.12523e-11	0.000519769
1171	8.32226e-09	4.00315e-10	3.33596e-11	0.000554817
1172	4.60005e-09	2.2127e-10	1.84392e-11	0.00030667
1173	9.74526e-09	4.68764e-10	3.90637e-11	0.000649684
1174	7.68342e-09	3.69586e-10	3.07988e-11	0.000512228
1175	5.79312e-09	2.78659e-10	2.32216e-11	0.000386208
1176	5.81304e-09	2.79617e-10	2.33014e-11	0.000387536
1177	5.00327e-09	2.40666e-10	2.00555e-11	0.000333551
1178	1.89424e-09	9.11161e-11	7.59301e-12	0.000126282
1179	1.09918e-08	5.28724e-10	4.40603e-11	0.000732785
1180	5.10869e-09	2.45737e-10	2.04781e-11	0.000340579
1181	1.19297e-08	5.73838e-10	4.78199e-11	0.000795312
1182	5.65585e-09	2.72056e-10	2.26714e-11	0.000377057
1183	8.9011e-09	4.28158e-10	3.56799e-11	0.000593406
1184	5.82069e-09	2.79986e-10	2.33321e-11	0.000388046
1185	4.24168e-09	2.04032e-10	1.70027e-11	0.000282779
1186	2.31629e-09	1.11418e-10	9.28481e-12	0.000154419
1187	7.56406e-09	3.63845e-10	3.03204e-11	0.000504271
1188	7.27503e-09	3.49942e-10	2.91618e-11	0.000485002
1189	7.06282e-09	3.39734e-10	2.83112e-11	0.000470854
1190	3.61292e-09	1.73788e-10	1.44823e-11	0.000240861
1191	8.22225e-09	3.95505e-10	3.29587e-11	0.00054815
1192	7.09638e-09	3.41349e-10	2.84457e-11	0.000473092
1193	4.95111e-09	2.38157e-10	1.98464e-11	0.000330074
1194	7.50057e-09	3.6079e-10	3.00659e-11	0.000500038
1195	4.49703e-09	2.16315e-10	1.80263e-11	0.000299802
1196	5.21952e-09	2.51068e-10	2.09223e-11	0.000347968
1197	7.07961e-09	3.40542e-10	2.83785e-11	0.000471974
1198	8.06398e-09	3.87891e-10	3.23243e-11	0.000537598
1199	5.21501e-09	2.50851e-10	2.09043e-11	0.000347667
1200	1.92824e-09	9.27519e-11	7.72933e-12	0.00012855
1201	5.52617e-09	2.65819e-10	2.21516e-11	0.000368411
1202	7.44079e-09	3.57915e-10	2.98262e-11	0.000496052
1203	1.29557e-08	6.23193e-10	5.19327e-11	0.000863714
1204	8.45531e-09	4.06715e-10	3.38929e-11	0.000563687
1205	4.48601e-09	2.15785e-10	1.79821e-11	0.000299067
1206	8.81175e-09	4.23861e-10	3.53217e-11	0.00058745
1207	1.08342e-08	5.21144e-10	4.34287e-11	0.00072228
1208	1.14802e-08	5.52217e-10	4.60181e-11	0.000765346
1209	8.15848e-09	3.92437e-10	3.27031e-11	0.000543899
1210	4.67155e-09	2.2471e-10	1.87258e-11	0.000311436
1211	6.03729e-09	2.90404e-10	2.42003e-11	0.000402486
1212	6.70314e-09	3.22433e-10	2.68694e-11	0.000446876
1213	1.01673e-08	4.89064e-10	4.07554e-11	0.000677819
1214	1.17096e-08	5.6325e-10	4.69375e-11	0.000780637
1215	8.80584e-09	4.23576e-10	3.5298e-11	0.000587056
1216	6.00378e-09	2.88793e-10	2.4066e-11	0.000400252
1217	7.99469e-09	3.84559e-10	3.20466e-11	0.000532979
1218	1.12567e-08	5.41467e-10	4.51223e-11	0.000750447
1219	6.06324e-09	2.91653e-10	2.43044e-11	0.000404216
1220	5.74829e-09	2.76503e-10	2.30419e-11	0.00038322
1221	5.00016e-09	2.40516e-10	2.0043e-11	0.000333344
1222	6.17614e-09	2.97083e-10	2.47569e-11	0.000411743
1223	5.09566e-09	2.4511e-10	2.04259e-11	0.000339711
1224	5.93319e-09	2.85397e-10	2.37831e-11	0.000395546
1225	4.23377e-09	2.03652e-10	1.6971e-11	0.000282251
1226	4.18481e-09	2.01297e-10	1.67747e-11	0.000278987
1227	5.58616e-09	2.68704e-10	2.2392e-11	0.00037241
1228	9.26051e-09	4.45447e-10	3.71206e-11	0.000617368
1229	5.89565e-09	2.83591e-10	2.36326e-11	0.000393043
1230	1.41157e-08	6.78992e-10	5.65826e-11	0.000941049
1231	3.75523e-09	1.80633e-10	1.50528e-11	0.000250349
1232	3.63484e-09	1.74842e-10	1.45702e-11	0.000242323
1233	9.53692e-09	4.58743e-10	3.82286e-11	0.000635795
1234	6.18814e-09	2.9766e-10	2.4805e-11	0.000412543
1235	6.27285e-09	3.01735e-10	2.51446e-11	0.00041819
1236	5.76412e-09	2.77264e-10	2.31054e-11	0.000384275
1237	1.36914e-08	6.58581e-10	5.48817e-11	0.000912761
1238	6.30273e-09	3.03173e-10	2.52644e-11	0.000420182
1239	8.67883e-09	4.17467e-10	3.47889e-11	0.000578589
1240	6.92387e-09	3.3305e-10	2.77542e-11	0.000461591
1241	4.38957e-09	2.11146e-10	1.75955e-11	0.000292638
1242	7.35807e-09	3.53936e-10	2.94947e-11	0.000490538
1243	3.34159e-09	1.60736e-10	1.33947e-11	0.000222773
1244	3.57751e-09	1.72085e-10	1.43404e-11	0.000238501
1245	5.26663e-09	2.53334e-10	2.11112e-11	0.000351109
1246	2.11606e-09	1.01786e-10	8.48219e-12	0.000141071
1247	8.68274e-09	4.17655e-10	3.48046e-11	0.00057885
1248	7.2937e-09	3.5084e-10	2.92367e-11	0.000486247
1249	2.99791e-09	1.44205e-10	1.20171e-11	0.000199861
1250	4.10581e-09	1.97497e-10	1.64581e-11	0.000273721
1251	6.2192e-09	2.99155e-10	2.49295e-11	0.000414613
1252	4.77662e-09	2.29764e-10	1.9147e-11	0.000318441
1253	8.76108e-09	4.21423e-10	3.51186e-11	0.000584072
1254	9.31236e-09	4.47941e-10	3.73284e-11	0.000620824
1255	8.67456e-09	4.17262e-10	3.47718e-11	0.000578304
1256	1.01203e-08	4.86805e-10	4.05671e-11	0.000674687
1257	6.58023e-09	3.16521e-10	2.63767e-11	0.000438682
1258	6.13731e-09	2.95215e-10	2.46013e-11	0.000409154
1259	6.80211e-09	3.27193e-10	2.72661e-11	0.000453474
1260	4.99215e-09	2.40131e-10	2.00109e-11	0.00033281
1261	5.96495e-09	2.86925e-10	2.39104e-11	0.000397663
1262	6.93829e-09	3.33744e-10	2.7812e-11	0.000462553
1263	1.0089e-08	4.853e-10	4.04416e-11	0.000672601
1264	1.15263e-08	5.54437e-10	4.6203e-11	0.000768422
1265	3.69374e-09	1.77675e-10	1.48063e-11	0.000246249
1266	6.56436e-09	3.15757e-10	2.63131e-11	0.000437624
1267	7.90417e-09	3.80205e-10	3.16837e-11	0.000526945
1268	1.31384e-08	6.31982e-10	5.26652e-11	0.000875896
1269	7.0797e-09	3.40546e-10	2.83789e-11	0.00047198
1270	5.24995e-09	2.52532e-10	2.10443e-11	0.000349997
1271	1.27161e-08	6.11668e-10	5.09724e-11	0.000847742
1272	6.56143e-09	3.15616e-10	2.63013e-11	0.000437428
1273	1.2844e-08	6.1782e-10	5.1485e-11	0.000856268
1274	6.1858e-09	2.97548e-10	2.47956e-11	0.000412386
1275	3.85106e-09	1.85243e-10	1.54369e-11	0.000256737
1276	1.08302e-08	5.20954e-10	4.34128e-11	0.000722016
1277	4.81681e-09	2.31697e-10	1.93081e-11	0.000321121
1278	4.0115e-09	1.9296e-10	1.608e-11	0.000267433
1279	5.83143e-09	2.80502e-10	2.33752e-11	0.000388762
1280	1.01956e-08	4.90428e-10	4.0869e-11	0.00067971
1281	6.76952e-09	3.25626e-10	2.71355e-11	0.000451301
1282	4.35054e-09	2.09269e-10	1.74391e-11	0.000290036
1283	4.73946e-09	2.27976e-10	1.8998e-11	0.000315964
1284	7.80398e-09	3.75385e-10	3.12821e-11	0.000520265
1285	7.27945e-09	3.50154e-10	2.91795e-11	0.000485297
1286	1.23415e-08	5.93647e-10	4.94706e-11	0.000822765
1287	7.80375e-09	3.75374e-10	3.12812e-11	0.00052025
1288	4.94495e-09	2.37861e-10	1.98217e-11	0.000329663
1289	7.68882e-09	3.69846e-10	3.08205e-11	0.000512588
1290	1.15094e-08	5.53622e-10	4.61352e-11	0.000767293
1291	4.92812e-09	2.37051e-10	1.97543e-11	0.000328541
1292	8.59424e-09	4.13398e-10	3.44498e-11	0.000572949
1293	3.48146e-09	1.67465e-10	1.39554e-11	0.000232098
1294	3.97996e-09	1.91443e-10	1.59536e-11	0.000265331
1295	3.57493e-09	1.71961e-10	1.43301e-11	0.000238329
1296	4.00828e-09	1.92806e-10	1.60671e-11	0.000267219
1297	6.14105e-09	2.95395e-10	2.46163e-11	0.000409403
1298	6.49238e-09	3.12295e-10	2.60246e-11	0.000432825
1299	6.83471e-09	3.28761e-10	2.73968e-11	0.000455647
1300	3.63631e-09	1.74913e-10	1.45761e-11	0.000242421
1301	1.07895e-08	5.18994e-10	4.32495e-11	0.000719299
1302	7.0138e-09	3.37376e-10	2.81147e-11	0.000467587
1303	8.16062e-09	3.9254e-10	3.27117e-11	0.000544041
1304	5.13619e-09	2.4706e-10	2.05883e-11	0.000342413
1305	4.70772e-09	2.2645e-10	1.88708e-11	0.000313848
1306	5.49122e-09	2.64137e-10	2.20114e-11	0.000366081
1307	3.38117e-09	1.6264e-10	1.35533e-11	0.000225411
1308	4.5619e-09	2.19435e-10	1.82863e-11	0.000304127
1309	1.2669e-08	6.09401e-10	5.07834e-11	0.000844599
1310	8.81564e-09	4.24048e-10	3.53373e-11	0.000587709
1311	4.15349e-09	1.9979e-10	1.66492e-11	0.0002769
1312	5.75083e-09	2.76625e-10	2.30521e-11	0.000383389
1313	4.71988e-09	2.27035e-10	1.89196e-11	0.000314659
1314	6.93452e-09	3.33562e-10	2.77969e-11	0.000462301
1315	6.18387e-09	2.97455e-10	2.47879e-11	0.000412258
1316	9.57969e-09	4.608e-10	3.84e-11	0.000638646
1317	9.73583e-09	4.68311e-10	3.90259e-11	0.000649056
1318	9.70994e-09	4.67065e-10	3.89221e-11	0.000647329
1319	6.43286e-09	3.09432e-10	2.5786e-11	0.000428857
1320	7.73982e-09	3.72299e-10	3.10249e-11	0.000515988
1321	6.83393e-09	3.28724e-10	2.73937e-11	0.000455595
1322	1.42088e-08	6.83469e-10	5.69558e-11	0.000947255
1323	1.10979e-08	5.33827e-10	4.44856e-11	0.000739857
1324	6.04556e-09	2.90802e-10	2.42335e-11	0.000403037
1325	6.3612e-09	3.05985e-10	2.54988e-11	0.00042408
1326	5.85546e-09	2.81658e-10	2.34715e-11	0.000390364
1327	4.44853e-09	2.13982e-10	1.78319e-11	0.000296569
1328	6.76183e-09	3.25256e-10	2.71047e-11	0.000450789
1329	1.50979e-08	7.26236e-10	6.05197e-11	0.00100653
1330	1.17881e-08	5.6703e-10	4.72525e-11	0.000785875
1331	6.24298e-09	3.00298e-10	2.50249e-11	0.000416199
1332	9.15817e-09	4.40524e-10	3.67103e-11	0.000610545
1333	5.06058e-09	2.43423e-10	2.02852e-11	0.000337372
1334	9.6447e-09	4.63927e-10	3.86606e-11	0.00064298
1335	6.8893e-09	3.31387e-10	2.76156e-11	0.000459287
1336	8.24587e-09	3.96641e-10	3.30534e-11	0.000549725
1337	7.20495e-09	3.46571e-10	2.88809e-11	0.00048033
1338	6.16195e-09	2.96401e-10	2.47001e-11	0.000410797
1339	4.93608e-09	2.37434e-10	1.97862e-11	0.000329072
1340	5.90547e-09	2.84063e-10	2.36719e-11	0.000393698
1341	4.57118e-09	2.19882e-10	1.83235e-11	0.000304745
1342	3.08398e-09	1.48345e-10	1.23621e-11	0.000205599
1343	5.6312e-09	2.70871e-10	2.25725e-11	0.000375413
1344	1.1157e-08	5.3667e-10	4.47225e-11	0.000743799
1345	6.73745e-09	3.24083e-10	2.70069e-11	0.000449163
1346	4.72019e-09	2.27049e-10	1.89208e-11	0.000314679
1347	5.47903e-09	2.63551e-10	2.19626e-11	0.000365269
1348	5.00691e-09	2.40841e-10	2.00701e-11	0.000333794
1349	4.21649e-09	2.0282e-10	1.69017e-11	0.000281099
1350	2.9162e-09	1.40274e-10	1.16895e-11	0.000194413
1351	5.36773e-09	2.58197e-10	2.15164e-11	0.000357848
1352	7.98418e-09	3.84053e-10	3.20044e-11	0.000532279
1353	2.93801e-09	1.41323e-10	1.17769e-11	0.000195867
1354	6.91735e-09	3.32737e-10	2.77281e-11	0.000461157
1355	6.78541e-09	3.2639e-10	2.71992e-11	0.000452361
1356	7.00407e-09	3.36908e-10	2.80757e-11	0.000466938
1357	1.16515e-08	5.60459e-10	4.67049e-11	0.000776768
1358	2.66646e-09	1.28262e-10	1.06885e-11	0.000177764
1359	6.55551e-09	3.15331e-10	2.62776e-11	0.000437034
1360	8.29429e-09	3.9897e-10	3.32475e-11	0.000552953
1361	3.79821e-09	1.82701e-10	1.52251e-11	0.000253214
1362	6.10696e-09	2.93756e-10	2.44796e-11	0.000407131
1363	9.26931e-09	4.4587e-10	3.71559e-11	0.000617954
1364	7.91871e-09	3.80904e-10	3.1742e-11	0.000527914
1365	3.39744e-09	1.63423e-10	1.36186e-11	0.000226496
1366	2.69543e-09	1.29655e-10	1.08046e-11	0.000179695
1367	9.13851e-09	4.39579e-10	3.66315e-11	0.000609234
1368	5.86044e-09	2.81897e-10	2.34915e-11	0.000390696
1369	6.30621e-09	3.0334e-10	2.52783e-11	0.000420414
1370	9.01754e-09	4.3376e-10	3.61466e-11	0.000601169
1371	7.61086e-09	3.66096e-10	3.0508e-11	0.000507391
1372	1.65217e-08	7.94722e-10	6.62269e-11	0.00110145
1373	7.00767e-09	3.37081e-10	2.80901e-11	0.000467178
1374	6.29281e-09	3.02695e-10	2.52246e-11	0.000419521
1375	5.53657e-09	2.66319e-10	2.21932e-11	0.000369104
1376	7.08779e-09	3.40935e-10	2.84112e-11	0.000472519
1377	7.98765e-09	3.8422e-10	3.20183e-11	0.00053251
1378	7.01379e-09	3.37376e-10	2.81146e-11	0.000467586
1379	1.585e-08	7.62414e-10	6.35345e-11	0.00105667
1380	7.18549e-09	3.45635e-10	2.88029e-11	0.000479033
1381	7.11023e-09	3.42014e-10	2.85012e-11	0.000474015
1382	1.08428e-08	5.21556e-10	4.3463e-11	0.000722852
1383	7.52845e-09	3.62132e-10	3.01777e-11	0.000501897
1384	3.62146e-09	1.74199e-10	1.45165e-11	0.000241431
1385	5.31621e-09	2.55719e-10	2.13099e-11	0.000354414
1386	6.85354e-09	3.29668e-10	2.74723e-11	0.000456903
1387	5.7089e-09	2.74608e-10	2.2884e-11	0.000380593
1388	5.09573e-09	2.45113e-10	2.04261e-11	0.000339715
1389	1.42506e-08	6.8548e-10	5.71233e-11	0.000950041
1390	6.64524e-09	3.19648e-10	2.66373e-11	0.000443016
1391	2.85302e-09	1.37235e-10	1.14363e-11	0.000190201
1392	5.41774e-09	2.60603e-10	2.17169e-11	0.000361183
1393	3.79617e-09	1.82602e-10	1.52169e-11	0.000253078
1394	1.19832e-08	5.76411e-10	4.80343e-11	0.000798878
1395	6.12153e-09	2.94456e-10	2.4538e-11	0.000408102
1396	7.1711e-09	3.44943e-10	2.87452e-11	0.000478073
1397	6.45227e-09	3.10366e-10	2.58638e-11	0.000430151
1398	4.44119e-09	2.13629e-10	1.78024e-11	0.000296079
1399	1.38292e-08	6.65209e-10	5.54341e-11	0.000921947
1400	7.07402e-09	3.40273e-10	2.83561e-11	0.000471601
1401	1.15236e-08	5.54304e-10	4.6192e-11	0.000768239
1402	8.38153e-09	4.03166e-10	3.35972e-11	0.000558769
1403	6.19524e-09	2.98002e-10	2.48335e-11	0.000413016
1404	1.84049e-08	8.85307e-10	7.37756e-11	0.00122699
1405	1.09887e-08	5.28577e-10	4.40481e-11	0.000732581
1406	9.03551e-09	4.34624e-10	3.62187e-11	0.000602367
1407	7.5549e-09	3.63404e-10	3.02837e-11	0.00050366
1408	4.74132e-09	2.28066e-10	1.90055e-11	0.000316088
1409	5.68193e-09	2.73311e-10	2.27759e-11	0.000378796
1410	4.64489e-09	2.23427e-10	1.86189e-11	0.000309659
1411	5.82098e-09	2.8e-10	2.33333e-11	0.000388066
1412	6.01793e-09	2.89473e-10	2.41228e-11	0.000401195
1413	9.24074e-09	4.44496e-10	3.70413e-11	0.000616049
1414	6.68148e-09	3.21391e-10	2.67826e-11	0.000445432
1415	5.50803e-09	2.64946e-10	2.20788e-11	0.000367202
1416	6.56801e-09	3.15933e-10	2.63277e-11	0.000437867
1417	5.36817e-09	2.58218e-10	2.15182e-11	0.000357878
1418	5.80597e-09	2.79277e-10	2.32731e-11	0.000387064
1419	6.72371e-09	3.23422e-10	2.69519e-11	0.000448247
1420	4.70134e-09	2.26143e-10	1.88452e-11	0.000313423
1421	4.09974e-09	1.97205e-10	1.64337e-11	0.000273316
1422	1.37977e-08	6.63694e-10	5.53078e-11	0.000919846
1423	5.39907e-09	2.59705e-10	2.16421e-11	0.000359938
1424	4.3626e-09	2.09849e-10	1.74874e-11	0.00029084
1425	6.74898e-09	3.24638e-10	2.70532e-11	0.000449932
1426	8.4556e-09	4.06729e-10	3.38941e-11	0.000563707
1427	7.2377e-09	3.48146e-10	2.90122e-11	0.000482513
1428	9.85746e-09	4.74161e-10	3.95134e-11	0.000657164
1429	6.11824e-09	2.94298e-10	2.45248e-11	0.000407882
1430	5.58999e-09	2.68888e-10	2.24074e-11	0.000372666
1431	5.60169e-09	2.69451e-10	2.24543e-11	0.000373446
1432	3.05398e-09	1.46902e-10	1.22418e-11	0.000203599
1433	4.81711e-09	2.31712e-10	1.93093e-11	0.000321141
1434	3.99765e-09	1.92294e-10	1.60245e-11	0.00026651
1435	5.28131e-09	2.54041e-10	2.117e-11	0.000352088
1436	7.5842e-09	3.64813e-10	3.04011e-11	0.000505613
1437	2.4435e-09	1.17537e-10	9.79472e-12	0.0001629
1438	1.15209e-08	5.54175e-10	4.61813e-11	0.00076806
1439	6.25348e-09	3.00803e-10	2.50669e-11	0.000416898
1440	6.54184e-09	3.14674e-10	2.62228e-11	0.000436122
1441	3.03689e-09	1.4608e-10	1.21733e-11	0.000202459
1442	4.21386e-09	2.02694e-10	1.68912e-11	0.000280924
1443	5.99409e-09	2.88326e-10	2.40272e-11	0.000399606
1444	8.40471e-09	4.04281e-10	3.36901e-11	0.000560314
1445	5.26343e-09	2.5318e-10	2.10983e-11	0.000350895
1446	4.73958e-09	2.27982e-10	1.89985e-11	0.000315972
1447	9.8137e-09	4.72056e-10	3.9338e-11	0.000654247
1448	5.60527e-09	2.69623e-10	2.24686e-11	0.000373685
1449	8.82202e-09	4.24355e-10	3.53629e-11	0.000588135
1450	1.20191e-08	5.78141e-10	4.81784e-11	0.000801274
1451	1.20769e-08	5.8092e-10	4.841e-11	0.000805127
1452	1.22017e-08	5.86921e-10	4.89101e-11	0.000813444
1453	1.05599e-08	5.07949e-10	4.23291e-11	0.000703992
1454	5.8102e-09	2.79481e-10	2.32901e-11	0.000387347
1455	6.04679e-09	2.90861e-10	2.42384e-11	0.00040312
1456	3.27426e-09	1.57498e-10	1.31248e-11	0.000218284
1457	4.79355e-09	2.30578e-10	1.92149e-11	0.00031957
1458	9.34709e-09	4.49611e-10	3.74676e-11	0.000623139
1459	6.75066e-09	3.24719e-10	2.70599e-11	0.000450044
1460	1.69083e-08	8.13319e-10	6.77766e-11	0.00112722
1461	1.90471e-08	9.16197e-10	7.63498e-11	0.0012698
1462	9.29895e-09	4.47296e-10	3.72747e-11	0.00061993
1463	6.69422e-09	3.22004e-10	2.68337e-11	0.000446282
1464	1.3127e-08	6.3143e-10	5.26191e-11	0.00087513
1465	6.87037e-09	3.30477e-10	2.75398e-11	0.000458025
1466	8.91929e-09	4.29034e-10	3.57528e-11	0.000594619
1467	6.21535e-09	2.98969e-10	2.49141e-11	0.000414357
1468	5.505e-09	2.648e-10	2.20667e-11	0.000367
1469	4.15639e-09	1.9993e-10	1.66608e-11	0.000277092
1470	4.2009e-09	2.02071e-10	1.68392e-11	0.00028006
1471	6.39553e-09	3.07636e-10	2.56363e-11	0.000426368
1472	1.03593e-08	4.98302e-10	4.15252e-11	0.000690622
1473	6.32347e-09	3.0417e-10	2.53475e-11	0.000421565
1474	3.42175e-09	1.64592e-10	1.3716e-11	0.000228117
1475	6.52247e-09	3.13742e-10	2.61452e-11	0.000434832
1476	7.58053e-09	3.64637e-10	3.03864e-11	0.000505368
1477	5.62267e-09	2.7046e-10	2.25383e-11	0.000374844
1478	1.07422e-08	5.16721e-10	4.306e-11	0.000716149
1479	8.06791e-09	3.88081e-10	3.234e-11	0.00053786
1480	4.65814e-09	2.24065e-10	1.86721e-11	0.000310543
1481	3.25943e-09	1.56784e-10	1.30653e-11	0.000217295
1482	9.92073e-09	4.77205e-10	3.9767e-11	0.000661382
1483	7.42589e-09	3.57198e-10	2.97665e-11	0.000495059
1484	8.11798e-09	3.90489e-10	3.25408e-11	0.000541199
1485	3.45077e-09	1.65988e-10	1.38323e-11	0.000230051
1486	9.64385e-09	4.63886e-10	3.86572e-11	0.000642924
1487	3.65151e-09	1.75644e-10	1.4637e-11	0.000243434
1488	5.28046e-09	2.54e-10	2.11666e-11	0.000352031
1489	5.99567e-09	2.88403e-10	2.40335e-11	0.000399712
1490	3.32906e-09	1.60134e-10	1.33445e-11	0.000221938
1491	2.37225e-08	1.14109e-09	9.5091e-11	0.0015815
1492	8.62139e-09	4.14704e-10	3.45587e-11	0.000574759
1493	4.52022e-09	2.17431e-10	1.81192e-11	0.000301348
1494	1.11062e-08	5.34226e-10	4.45189e-11	0.000740411
1495	8.36418e-09	4.02332e-10	3.35277e-11	0.000557612
1496	1.19602e-08	5.75307e-10	4.79422e-11	0.000797347
1497	7.48663e-09	3.6012e-10	3.001e-11	0.000499109
1498	8.01792e-09	3.85676e-10	3.21397e-11	0.000534528
1499	4.21223e-09	2.02616e-10	1.68846e-11	0.000280815
1500	9.78725e-09	4.70784e-10	3.9232e-11	0.000652483
1501	1.31227e-08	6.31223e-10	5.26019e-11	0.000874844
1502	3.19589e-09	1.53728e-10	1.28106e-11	0.000213059
1503	5.00687e-09	2.40839e-10	2.00699e-11	0.000333791
1504	2.70618e-09	1.30172e-10	1.08477e-11	0.000180412
1505	7.72351e-09	3.71514e-10	3.09595e-11	0.000514901
1506	8.32288e-09	4.00345e-10	3.33621e-11	0.000554859
1507	8.01832e-09	3.85696e-10	3.21413e-11	0.000534555
1508	1.03216e-08	4.96485e-10	4.13738e-11	0.000688104
1509	8.18665e-09	3.93792e-10	3.2816e-11	0.000545777
1510	1.02178e-08	4.91495e-10	4.09579e-11	0.000681188
1511	7.81482e-09	3.75907e-10	3.13256e-11	0.000520988
1512	1.06876e-08	5.14091e-10	4.28409e-11	0.000712505
1513	4.00502e-09	1.92648e-10	1.6054e-11	0.000267001
1514	3.82507e-09	1.83993e-10	1.53327e-11	0.000255005
1515	4.63709e-09	2.23052e-10	1.85877e-11	0.000309139
1516	4.92547e-09	2.36924e-10	1.97436e-11	0.000328364
1517	4.63851e-09	2.2312e-10	1.85934e-11	0.000309234
1518	3.32831e-09	1.60097e-10	1.33415e-11	0.000221887
1519	8.16414e-09	3.92709e-10	3.27258e-11	0.000544276
1520	4.64245e-09	2.2331e-10	1.86092e-11	0.000309496
1521	5.93888e-09	2.8567e-10	2.38059e-11	0.000395925
1522	9.86546e-09	4.74546e-10	3.95455e-11	0.000657697
1523	8.96828e-09	4.3139e-10	3.59492e-11	0.000597885
1524	4.76914e-09	2.29404e-10	1.9117e-11	0.000317943
1525	7.01131e-09	3.37256e-10	2.81047e-11	0.000467421
1526	6.21427e-09	2.98917e-10	2.49098e-11	0.000414285
1527	8.06954e-09	3.88159e-10	3.23466e-11	0.000537969
1528	3.4534e-09	1.66115e-10	1.38429e-11	0.000230227
1529	6.2669e-09	3.01449e-10	2.51207e-11	0.000417793
1530	6.50486e-09	3.12895e-10	2.60746e-11	0.000433657
1531	7.16287e-09	3.44547e-10	2.87122e-11	0.000477525
1532	8.44829e-09	4.06378e-10	3.38648e-11	0.00056322
1533	9.42684e-09	4.53447e-10	3.77873e-11	0.000628456
1534	7.26846e-09	3.49626e-10	2.91355e-11	0.000484564
1535	1.12836e-08	5.42761e-10	4.52301e-11	0.00075224
1536	5.63077e-09	2.7085e-10	2.25708e-11	0.000375385
1537	6.85854e-09	3.29908e-10	2.74923e-11	0.000457236
1538	6.37634e-09	3.06713e-10	2.55594e-11	0.000425089
1539	6.11e-09	2.93902e-10	2.44918e-11	0.000407333
1540	1.24019e-08	5.96554e-10	4.97128e-11	0.000826795
1541	7.65517e-09	3.68227e-10	3.06856e-11	0.000510344
1542	3.11521e-09	1.49847e-10	1.24872e-11	0.000207681
1543	4.30715e-09	2.07182e-10	1.72651e-11	0.000287144
1544	9.1978e-09	4.4243e-10	3.68692e-11	0.000613187
1545	9.60488e-09	4.62011e-10	3.8501e-11	0.000640325
1546	9.33709e-09	4.4913e-10	3.74275e-11	0.000622473
1547	4.90316e-09	2.3585e-10	1.96542e-11	0.000326877
1548	2.77011e-09	1.33247e-10	1.11039e-11	0.000184674
1549	5.24637e-09	2.5236e-10	2.103e-11	0.000349758
1550	3.14561e-09	1.51309e-10	1.26091e-11	0.000209707
1551	5.91337e-09	2.84444e-10	2.37036e-11	0.000394225
1552	9.2689e-09	4.45851e-10	3.71542e-11	0.000617927
1553	8.77351e-09	4.22021e-10	3.51684e-11	0.000584901
1554	4.58972e-09	2.20773e-10	1.83978e-11	0.000305981
1555	5.18257e-09	2.49291e-10	2.07742e-11	0.000345505
1556	4.38427e-09	2.10891e-10	1.75743e-11	0.000292285
1557	8.72437e-09	4.19658e-10	3.49715e-11	0.000581625
1558	6.95774e-09	3.34679e-10	2.789e-11	0.000463849
1559	7.35642e-09	3.53857e-10	2.9488e-11	0.000490428
1560	5.04687e-09	2.42763e-10	2.02303e-11	0.000336458
1561	9.84715e-09	4.73665e-10	3.94721e-11	0.000656477
1562	1.54184e-08	7.41652e-10	6.18043e-11	0.00102789
1563	6.85516e-09	3.29745e-10	2.74788e-11	0.000457011
1564	3.6857e-09	1.77289e-10	1.4774e-11	0.000245713
1565	7.21777e-09	3.47188e-10	2.89323e-11	0.000481185
1566	5.83324e-09	2.80589e-10	2.33824e-11	0.000388883
1567	6.45354e-09	3.10426e-10	2.58689e-11	0.000430236
1568	8.59269e-09	4.13324e-10	3.44436e-11	0.000572846
1569	3.86803e-09	1.86059e-10	1.55049e-11	0.000257869
1570	6.33756e-09	3.04848e-10	2.5404e-11	0.000422504
1571	6.40761e-09	3.08217e-10	2.56848e-11	0.000427174
1572	1.1827e-08	5.689e-10	4.74084e-11	0.000788468
1573	7.36295e-09	3.54171e-10	2.95142e-11	0.000490863
1574	8.62433e-09	4.14845e-10	3.45704e-11	0.000574955
1575	5.32331e-09	2.56061e-10	2.13384e-11	0.000354887
1576	4.38827e-09	2.11084e-10	1.75903e-11	0.000292552
1577	2.89098e-09	1.39061e-10	1.15884e-11	0.000192732
1578	6.4879e-09	3.12079e-10	2.60066e-11	0.000432526
1579	7.26983e-09	3.49692e-10	2.9141e-11	0.000484655
1580	4.03699e-09	1.94187e-10	1.61822e-11	0.000269133
1581	4.2084e-09	2.02431e-10	1.68693e-11	0.00028056
1582	4.91375e-09	2.3636e-10	1.96967e-11	0.000327584
1583	7.57158e-09	3.64206e-10	3.03505e-11	0.000504772
1584	7.47196e-09	3.59414e-10	2.99512e-11	0.000498131
1585	9.65734e-09	4.64535e-10	3.87112e-11	0.000643822
1586	5.06794e-09	2.43777e-10	2.03147e-11	0.000337863
1587	6.99054e-09	3.36257e-10	2.80214e-11	0.000466036
1588	4.01329e-09	1.93046e-10	1.60872e-11	0.000267553
1589	6.51917e-09	3.13583e-10	2.6132e-11	0.000434611
1590	5.85599e-09	2.81683e-10	2.34736e-11	0.000390399
1591	1.41281e-08	6.79586e-10	5.66322e-11	0.000941873
1592	4.95418e-09	2.38305e-10	1.98587e-11	0.000330278
1593	6.27609e-09	3.01891e-10	2.51576e-11	0.000418406
1594	9.39459e-09	4.51896e-10	3.7658e-11	0.000626306
1595	9.69762e-09	4.66473e-10	3.88727e-11	0.000646508
1596	1.07574e-08	5.17451e-10	4.31209e-11	0.000717161
1597	7.80165e-09	3.75273e-10	3.12728e-11	0.00052011
1598	7.66835e-09	3.68861e-10	3.07384e-11	0.000511223
1599	7.61006e-09	3.66057e-10	3.05048e-11	0.000507337
1600	6.93649e-09	3.33658e-10	2.78048e-11	0.000462433
1601	5.27332e-09	2.53656e-10	2.1138e-11	0.000351554
1602	2.42573e-09	1.16682e-10	9.72347e-12	0.000161715
1603	1.19256e-08	5.73645e-10	4.78037e-11	0.000795043
1604	2.81664e-09	1.35485e-10	1.12904e-11	0.000187776
1605	8.83513e-09	4.24985e-10	3.54154e-11	0.000589008
1606	4.5548e-09	2.19094e-10	1.82578e-11	0.000303653
1607	6.69895e-09	3.22231e-10	2.68526e-11	0.000446596
1608	1.00102e-08	4.81508e-10	4.01257e-11	0.000667347
1609	7.51597e-09	3.61532e-10	3.01276e-11	0.000501065
1610	7.94499e-09	3.82168e-10	3.18473e-11	0.000529666
1611	1.25032e-08	6.01426e-10	5.01188e-11	0.000833547
1612	3.76275e-09	1.80995e-10	1.50829e-11	0.00025085
1613	6.92641e-09	3.33172e-10	2.77644e-11	0.000461761
1614	7.67264e-09	3.69068e-10	3.07556e-11	0.00051151
1615	3.69476e-08	1.77724e-09	1.48104e-10	0.00246317
1616	1.17077e-08	5.63159e-10	4.69299e-11	0.00078051
1617	8.97998e-09	4.31953e-10	3.59961e-11	0.000598666
1618	6.66568e-09	3.20631e-10	2.67192e-11	0.000444379
1619	5.56391e-09	2.67634e-10	2.23028e-11	0.000370927
1620	5.66302e-09	2.72401e-10	2.27001e-11	0.000377534
1621	9.58276e-09	4.60947e-10	3.84123e-11	0.00063885
1622	7.078e-09	3.40464e-10	2.8372e-11	0.000471867
1623	4.05546e-09	1.95075e-10	1.62562e-11	0.000270364
1624	6.24223e-09	3.00262e-10	2.50219e-11	0.000416149
1625	5.79641e-09	2.78818e-10	2.32348e-11	0.000386428
1626	8.17963e-09	3.93455e-10	3.27879e-11	0.000545309
1627	6.40025e-09	3.07863e-10	2.56553e-11	0.000426683
1628	4.63492e-09	2.22948e-10	1.8579e-11	0.000308994
1629	6.87565e-09	3.30731e-10	2.75609e-11	0.000458377
1630	8.2725e-09	3.97922e-10	3.31602e-11	0.0005515
1631	5.23085e-09	2.51613e-10	2.09677e-11	0.000348723
1632	9.79732e-09	4.71269e-10	3.92724e-11	0.000653155
1633	5.32152e-09	2.55974e-10	2.13312e-11	0.000354768
1634	7.16579e-09	3.44687e-10	2.87239e-11	0.00047772
1635	1.06548e-08	5.12515e-10	4.27096e-11	0.00071032
1636	5.50479e-09	2.6479e-10	2.20658e-11	0.000366986
1637	5.77562e-09	2.77818e-10	2.31515e-11	0.000385042
1638	5.40417e-09	2.5995e-10	2.16625e-11	0.000360278
1639	1.18351e-08	5.69288e-10	4.74407e-11	0.000789005
1640	9.63937e-09	4.63671e-10	3.86392e-11	0.000642625
1641	4.77032e-09	2.29461e-10	1.91217e-11	0.000318021
1642	7.12951e-09	3.42942e-10	2.85785e-11	0.000475301
1643	5.59851e-09	2.69298e-10	2.24415e-11	0.000373234
1644	7.93062e-09	3.81477e-10	3.17897e-11	0.000528708
1645	7.6149e-09	3.6629e-10	3.05242e-11	0.00050766
1646	5.02896e-09	2.41902e-10	2.01585e-11	0.000335264
1647	5.3445e-09	2.5708e-10	2.14233e-11	0.0003563
1648	8.61909e-09	4.14593e-10	3.45495e-11	0.000574606
1649	4.93357e-09	2.37313e-10	1.97761e-11	0.000328905
1650	4.43136e-09	2.13156e-10	1.7763e-11	0.000295424
1651	3.98362e-09	1.91619e-10	1.59683e-11	0.000265575
1652	4.39296e-09	2.11309e-10	1.76091e-11	0.000292864
1653	8.63734e-09	4.15471e-10	3.46226e-11	0.000575822
1654	1.34069e-08	6.44894e-10	5.37411e-11	0.000893791
1655	8.59235e-09	4.13307e-10	3.44423e-11	0.000572823
1656	7.92741e-09	3.81322e-10	3.17769e-11	0.000528494
1657	7.43642e-09	3.57705e-10	2.98088e-11	0.000495762
1658	7.54957e-09	3.63148e-10	3.02623e-11	0.000503305
1659	4.17943e-09	2.01038e-10	1.67531e-11	0.000278628
1660	5.17254e-09	2.48808e-10	2.0734e-11	0.000344836
1661	8.24022e-09	3.96369e-10	3.30308e-11	0.000549348
1662	5.59349e-09	2.69057e-10	2.24214e-11	0.000372899
1663	7.85092e-09	3.77643e-10	3.14702e-11	0.000523395
1664	5.90334e-09	2.83961e-10	2.36634e-11	0.000393556
1665	5.70038e-09	2.74198e-10	2.28499e-11	0.000380026
1666	6.3024e-09	3.03157e-10	2.5263e-11	0.00042016
1667	4.96277e-09	2.38718e-10	1.98932e-11	0.000330852
1668	6.0465e-09	2.90847e-10	2.42373e-11	0.0004031
1669	5.74178e-09	2.7619e-10	2.30158e-11	0.000382785
1670	4.29313e-09	2.06507e-10	1.72089e-11	0.000286209
1671	4.96001e-09	2.38585e-10	1.98821e-11	0.000330667
1672	8.54012e-09	4.10795e-10	3.42329e-11	0.000569342
1673	4.98879e-09	2.3997e-10	1.99975e-11	0.000332586
1674	7.5999e-09	3.65568e-10	3.0464e-11	0.00050666
1675	6.72001e-09	3.23245e-10	2.6937e-11	0.000448001
1676	6.88426e-09	3.31145e-10	2.75954e-11	0.000458951
1677	4.90259e-09	2.35823e-10	1.96519e-11	0.000326839
1678	7.46646e-09	3.5915e-10	2.99292e-11	0.000497764
1679	6.55812e-09	3.15457e-10	2.62881e-11	0.000437208
1680	1.24916e-08	6.00869e-10	5.00724e-11	0.000832774
1681	4.45397e-09	2.14244e-10	1.78537e-11	0.000296932
1682	9.46916e-09	4.55483e-10	3.79569e-11	0.000631277
1683	7.06282e-09	3.39734e-10	2.83112e-11	0.000470855
1684	1.12821e-08	5.4269e-10	4.52241e-11	0.000752141
1685	7.51319e-09	3.61398e-10	3.01165e-11	0.000500879
1686	7.78839e-09	3.74635e-10	3.12196e-11	0.000519226
1687	4.61886e-09	2.22175e-10	1.85146e-11	0.000307924
1688	1.11952e-08	5.3851e-10	4.48759e-11	0.000746349
1689	1.03391e-08	4.97327e-10	4.14439e-11	0.00068927
1690	6.57475e-09	3.16257e-10	2.63547e-11	0.000438317
1691	3.67207e-09	1.76633e-10	1.47194e-11	0.000244804
1692	4.60154e-09	2.21342e-10	1.84452e-11	0.000306769
1693	3.63448e-09	1.74825e-10	1.45688e-11	0.000242299
1694	7.11227e-09	3.42113e-10	2.85094e-11	0.000474151
1695	8.80889e-09	4.23723e-10	3.53103e-11	0.000587259
1696	5.62568e-09	2.70605e-10	2.25504e-11	0.000375045
1697	3.76012e-09	1.80868e-10	1.50724e-11	0.000250675
1698	9.57503e-09	4.60576e-10	3.83813e-11	0.000638335
1699	6.53457e-09	3.14325e-10	2.61937e-11	0.000435638
1700	7.47017e-09	3.59328e-10	2.9944e-11	0.000498011
1701	9.83238e-09	4.72955e-10	3.94129e-11	0.000655492
1702	5.66077e-09	2.72293e-10	2.26911e-11	0.000377385
1703	4.5326e-09	2.18026e-10	1.81688e-11	0.000302173
1704	3.45051e-09	1.65975e-10	1.38313e-11	0.000230034
1705	7.6534e-09	3.68142e-10	3.06785e-11	0.000510226
1706	9.98261e-09	4.80181e-10	4.00151e-11	0.000665507
1707	4.3863e-09	2.10989e-10	1.75824e-11	0.00029242
1708	5.45208e-09	2.62255e-10	2.18546e-11	0.000363472
1709	4.22088e-09	2.03032e-10	1.69193e-11	0.000281392
1710	6.86995e-09	3.30457e-10	2.75381e-11	0.000457997
1711	8.11124e-09	3.90165e-10	3.25137e-11	0.000540749
1712	4.67476e-09	2.24864e-10	1.87387e-11	0.000311651
1713	9.83681e-09	4.73168e-10	3.94307e-11	0.000655788
1714	1.03542e-08	4.98055e-10	4.15046e-11	0.00069028
1715	9.33201e-09	4.48886e-10	3.74072e-11	0.000622134
1716	8.94196e-09	4.30124e-10	3.58437e-11	0.00059613
1717	5.77057e-09	2.77574e-10	2.31312e-11	0.000384704
1718	6.80031e-09	3.27107e-10	2.72589e-11	0.000453354
1719	5.65395e-09	2.71965e-10	2.26637e-11	0.00037693
1720	1.35892e-08	6.53663e-10	5.44719e-11	0.000905944
1721	9.08693e-09	4.37097e-10	3.64248e-11	0.000605795
1722	6.39147e-09	3.07441e-10	2.56201e-11	0.000426098
1723	4.91805e-09	2.36567e-10	1.97139e-11	0.00032787
1724	5.53859e-09	2.66416e-10	2.22013e-11	0.000369239
1725	2.81348e-09	1.35333e-10	1.12778e-11	0.000187566
1726	7.76129e-09	3.73332e-10	3.1111e-11	0.000517419
1727	7.44814e-09	3.58268e-10	2.98557e-11	0.000496542
1728	1.00086e-08	4.81429e-10	4.01191e-11	0.000667237
1729	9.23032e-09	4.43995e-10	3.69996e-11	0.000615355
1730	8.3897e-09	4.03559e-10	3.36299e-11	0.000559313
1731	5.99511e-09	2.88375e-10	2.40313e-11	0.000399674
1732	7.59507e-09	3.65336e-10	3.04447e-11	0.000506338
1733	3.35887e-09	1.61567e-10	1.34639e-11	0.000223924
1734	8.19196e-09	3.94048e-10	3.28373e-11	0.00054613
1735	9.72899e-09	4.67982e-10	3.89985e-11	0.000648599
1736	3.82498e-09	1.83988e-10	1.53324e-11	0.000254999
1737	1.66418e-08	8.00501e-10	6.67084e-11	0.00110945
1738	3.59454e-09	1.72904e-10	1.44086e-11	0.000239636
1739	7.35545e-09	3.5381e-10	2.94842e-11	0.000490363
1740	1.38946e-08	6.68354e-10	5.56962e-11	0.000926306
1741	8.54158e-09	4.10865e-10	3.42388e-11	0.000569439
1742	1.74656e-08	8.40127e-10	7.00106e-11	0.00116437
1743	5.86416e-09	2.82077e-10	2.35064e-11	0.000390944
1744	8.46444e-09	4.07154e-10	3.39295e-11	0.000564296
1745	1.09854e-08	5.28415e-10	4.40346e-11	0.000732357
1746	9.34726e-09	4.4962e-10	3.74683e-11	0.000623151
1747	7.03746e-09	3.38514e-10	2.82095e-11	0.000469164
1748	1.54215e-08	7.41803e-10	6.18169e-11	0.0010281
1749	2.90884e-09	1.3992e-10	1.166e-11	0.000193923
1750	1.22166e-08	5.87641e-10	4.89701e-11	0.000814442
1751	2.87358e-09	1.38224e-10	1.15187e-11	0.000191572
1752	4.07094e-09	1.9582e-10	1.63183e-11	0.000271396
1753	1.1407e-08	5.48697e-10	4.57247e-11	0.000760466
1754	5.23841e-09	2.51977e-10	2.09981e-11	0.000349227
1755	5.1821e-09	2.49268e-10	2.07724e-11	0.000345473
1756	6.28293e-09	3.0222e-10	2.5185e-11	0.000418862
1757	7.57573e-09	3.64406e-10	3.03672e-11	0.000505049
1758	5.21974e-09	2.51079e-10	2.09232e-11	0.000347983
1759	7.40951e-09	3.56411e-10	2.97009e-11	0.000493968
1760	5.61575e-09	2.70127e-10	2.25106e-11	0.000374383
1761	6.1137e-09	2.9408e-10	2.45067e-11	0.00040758
1762	1.91402e-09	9.2068e-11	7.67233e-12	0.000127602
1763	9.92942e-09	4.77622e-10	3.98019e-11	0.000661961
1764	6.32758e-09	3.04368e-10	2.5364e-11	0.000421838
1765	1.13025e-08	5.4367e-10	4.53058e-11	0.0007535
1766	8.11035e-09	3.90122e-10	3.25102e-11	0.00054069
1767	3.01773e-09	1.45158e-10	1.20965e-11	0.000201182
1768	2.47233e-09	1.18924e-10	9.9103e-12	0.000164822
1769	2.77343e-09	1.33407e-10	1.11172e-11	0.000184895
1770	5.56126e-09	2.67506e-10	2.22922e-11	0.000370751
1771	1.09445e-08	5.26451e-10	4.3871e-11	0.000729636
1772	5.78876e-09	2.78449e-10	2.32041e-11	0.000385917
1773	5.8661e-09	2.8217e-10	2.35141e-11	0.000391073
1774	8.60578e-09	4.13953e-10	3.44961e-11	0.000573719
1775	1.04181e-08	5.01129e-10	4.17607e-11	0.00069454
1776	6.23001e-09	2.99675e-10	2.49729e-11	0.000415334
1777	4.11736e-09	1.98052e-10	1.65044e-11	0.000274491
1778	8.40797e-09	4.04438e-10	3.37032e-11	0.000560531
1779	5.06163e-09	2.43473e-10	2.02894e-11	0.000337442
1780	5.33509e-09	2.56627e-10	2.13856e-11	0.000355673
1781	9.40912e-09	4.52595e-10	3.77163e-11	0.000627274
1782	1.67449e-08	8.05458e-10	6.71215e-11	0.00111633
1783	4.38177e-09	2.10771e-10	1.75642e-11	0.000292118
1784	1.10491e-08	5.31482e-10	4.42901e-11	0.000736608
1785	3.91103e-09	1.88128e-10	1.56773e-11	0.000260736
1786	7.92127e-09	3.81027e-10	3.17523e-11	0.000528085
1787	8.70277e-09	4.18618e-10	3.48849e-11	0.000580184
1788	4.84584e-09	2.33093e-10	1.94244e-11	0.000323056
1789	7.12612e-09	3.42779e-10	2.85649e-11	0.000475074
1790	9.8752e-09	4.75014e-10	3.95845e-11	0.000658346
1791	4.57252e-09	2.19946e-10	1.83289e-11	0.000304835
1792	7.67017e-09	3.68949e-10	3.07457e-11	0.000511345
1793	8.91708e-09	4.28927e-10	3.57439e-11	0.000594472
1794	5.52902e-09	2.65956e-10	2.2163e-11	0.000368601
1795	6.3169e-09	3.03854e-10	2.53212e-11	0.000421126
1796	5.62029e-09	2.70346e-10	2.25288e-11	0.000374686
1797	1.69363e-08	8.14663e-10	6.78886e-11	0.00112908
1798	1.21611e-08	5.84972e-10	4.87476e-11	0.000810742
1799	7.77028e-09	3.73764e-10	3.1147e-11	0.000518018
1800	4.19083e-09	2.01586e-10	1.67988e-11	0.000279388
1801	4.69093e-09	2.25642e-10	1.88035e-11	0.000312729
1802	3.61176e-09	1.73732e-10	1.44777e-11	0.000240784
1803	4.85674e-09	2.33618e-10	1.94681e-11	0.000323782
1804	9.38527e-09	4.51448e-10	3.76207e-11	0.000625685
1805	4.6616e-09	2.24231e-10	1.86859e-11	0.000310773
1806	6.09257e-09	2.93063e-10	2.44219e-11	0.000406171
1807	3.98043e-09	1.91466e-10	1.59555e-11	0.000265362
1808	8.83356e-09	4.2491e-10	3.54091e-11	0.000588904
1809	4.3457e-09	2.09036e-10	1.74196e-11	0.000289713
1810	7.0227e-09	3.37804e-10	2.81504e-11	0.00046818
1811	5.71278e-09	2.74795e-10	2.28996e-11	0.000380852
1812	6.62391e-09	3.18622e-10	2.65518e-11	0.000441594
1813	1.32629e-08	6.37969e-10	5.31641e-11	0.000884193
1814	6.32244e-09	3.04121e-10	2.53434e-11	0.000421496
1815	4.73415e-09	2.27721e-10	1.89768e-11	0.00031561
1816	3.46076e-09	1.66469e-10	1.38724e-11	0.000230717
1817	1.07889e-08	5.18965e-10	4.32471e-11	0.00071926
1818	6.15169e-09	2.95907e-10	2.46589e-11	0.000410113
1819	2.45805e-09	1.18237e-10	9.85305e-12	0.00016387
1820	5.3572e-09	2.57691e-10	2.14742e-11	0.000357146
1821	1.23338e-08	5.93278e-10	4.94398e-11	0.000822253
1822	1.15798e-08	5.57008e-10	4.64173e-11	0.000771985
1823	6.0219e-09	2.89664e-10	2.41386e-11	0.00040146
1824	8.92914e-09	4.29507e-10	3.57923e-11	0.000595276
1825	6.28685e-09	3.02409e-10	2.52007e-11	0.000419124
1826	1.35963e-08	6.54007e-10	5.45006e-11	0.000906421
1827	1.92702e-09	9.26932e-11	7.72443e-12	0.000128468
1828	5.08565e-09	2.44629e-10	2.03857e-11	0.000339043
1829	7.79021e-09	3.74723e-10	3.12269e-11	0.000519347
1830	3.93367e-09	1.89216e-10	1.5768e-11	0.000262245
1831	1.01938e-08	4.90339e-10	4.08616e-11	0.000679586
1832	1.19148e-08	5.73121e-10	4.77601e-11	0.000794317
1833	5.79323e-09	2.78665e-10	2.3222e-11	0.000386215
1834	5.79454e-09	2.78728e-10	2.32273e-11	0.000386303
1835	5.8714e-09	2.82425e-10	2.35354e-11	0.000391426
1836	2.69531e-09	1.29649e-10	1.08041e-11	0.000179687
1837	6.32264e-09	3.0413e-10	2.53442e-11	0.00042151
1838	9.00024e-09	4.32927e-10	3.60773e-11	0.000600016
1839	5.56124e-09	2.67505e-10	2.22921e-11	0.000370749
1840	9.72907e-09	4.67985e-10	3.89988e-11	0.000648605
1841	3.93211e-09	1.89141e-10	1.57618e-11	0.000262141
1842	3.45313e-09	1.66101e-10	1.38418e-11	0.000230208
1843	6.30488e-09	3.03276e-10	2.5273e-11	0.000420325
1844	6.28798e-09	3.02463e-10	2.52052e-11	0.000419199
1845	4.78866e-09	2.30343e-10	1.91953e-11	0.000319244
1846	1.11294e-08	5.35341e-10	4.46118e-11	0.000741957
1847	3.05162e-09	1.46788e-10	1.22323e-11	0.000203441
1848	9.82508e-09	4.72604e-10	3.93836e-11	0.000655005
1849	8.05453e-09	3.87437e-10	3.22864e-11	0.000536969
1850	8.6637e-09	4.16739e-10	3.47283e-11	0.00057758
1851	1.28117e-08	6.16263e-10	5.13553e-11	0.00085411
1852	6.9531e-09	3.34456e-10	2.78714e-11	0.00046354
1853	7.34531e-09	3.53322e-10	2.94435e-11	0.000489687
1854	4.33941e-09	2.08733e-10	1.73944e-11	0.000289294
1855	6.29237e-09	3.02674e-10	2.52228e-11	0.000419491
1856	6.38929e-09	3.07336e-10	2.56113e-11	0.000425952
1857	8.74748e-09	4.20769e-10	3.50641e-11	0.000583165
1858	7.18913e-09	3.4581e-10	2.88175e-11	0.000479275
1859	5.23408e-09	2.51769e-10	2.09807e-11	0.000348939
1860	1.05399e-08	5.06986e-10	4.22489e-11	0.000702658
1861	6.35979e-09	3.05917e-10	2.54931e-11	0.000423986
1862	7.32209e-09	3.52205e-10	2.93504e-11	0.000488139
1863	4.25555e-09	2.047e-10	1.70583e-11	0.000283703
1864	6.9924e-09	3.36347e-10	2.80289e-11	0.00046616
1865	3.51487e-09	1.69071e-10	1.40893e-11	0.000234324
1866	8.09349e-09	3.89311e-10	3.24426e-11	0.000539566
1867	4.97667e-09	2.39387e-10	1.99489e-11	0.000331778
1868	4.45855e-09	2.14464e-10	1.7872e-11	0.000297237
1869	1.57911e-08	7.59581e-10	6.32984e-11	0.00105274
1870	8.35338e-09	4.01812e-10	3.34844e-11	0.000556892
1871	7.94232e-09	3.8204e-10	3.18366e-11	0.000529488
1872	7.85671e-09	3.77922e-10	3.14935e-11	0.000523781
1873	9.35326e-09	4.49908e-10	3.74924e-11	0.000623551
1874	1.37541e-08	6.61598e-10	5.51332e-11	0.000916942
1875	8.58861e-09	4.13127e-10	3.44273e-11	0.000572574
1876	4.12441e-09	1.98391e-10	1.65326e-11	0.000274961
1877	6.36457e-09	3.06147e-10	2.55123e-11	0.000424305
1878	9.40525e-09	4.52409e-10	3.77008e-11	0.000627017
1879	4.19673e-09	2.0187e-10	1.68225e-11	0.000279782
1880	2.45266e-09	1.17977e-10	9.83144e-12	0.000163511
1881	4.89582e-09	2.35498e-10	1.96248e-11	0.000326388
1882	3.53385e-09	1.69985e-10	1.41654e-11	0.00023559
1883	4.95558e-09	2.38372e-10	1.98643e-11	0.000330372
1884	9.45275e-09	4.54694e-10	3.78912e-11	0.000630183
1885	5.67323e-09	2.72892e-10	2.2741e-11	0.000378215
1886	5.07034e-09	2.43892e-10	2.03244e-11	0.000338023
1887	5.58506e-09	2.68651e-10	2.23876e-11	0.000372338
1888	6.54172e-09	3.14668e-10	2.62223e-11	0.000436114
1889	5.24561e-09	2.52323e-10	2.10269e-11	0.000349707
1890	8.10038e-09	3.89643e-10	3.24702e-11	0.000540025
1891	5.27724e-09	2.53845e-10	2.11537e-11	0.000351816
1892	3.44488e-09	1.65705e-10	1.38087e-11	0.000229659
1893	7.3802e-09	3.55e-10	2.95834e-11	0.000492013
1894	1.14617e-08	5.51327e-10	4.59439e-11	0.000764112
1895	4.36295e-09	2.09865e-10	1.74888e-11	0.000290863
1896	3.58235e-09	1.72317e-10	1.43598e-11	0.000238823
1897	6.06987e-09	2.91971e-10	2.43309e-11	0.000404658
1898	8.24971e-09	3.96826e-10	3.30688e-11	0.000549981
1899	1.05313e-08	5.06575e-10	4.22145e-11	0.000702087
1900	5.55096e-09	2.67011e-10	2.22509e-11	0.000370064
1901	5.5147e-09	2.65267e-10	2.21056e-11	0.000367646
1902	9.36636e-09	4.50538e-10	3.75449e-11	0.000624424
1903	1.43336e-08	6.89472e-10	5.7456e-11	0.000955574
1904	1.25311e-08	6.0277e-10	5.02308e-11	0.000835409
1905	8.29502e-09	3.99005e-10	3.32504e-11	0.000553001
1906	6.37742e-09	3.06765e-10	2.55638e-11	0.000425161
1907	9.5971e-09	4.61637e-10	3.84698e-11	0.000639807
1908	3.22035e-09	1.54904e-10	1.29087e-11	0.00021469
1909	5.17231e-09	2.48797e-10	2.07331e-11	0.000344821
1910	7.17561e-09	3.4516e-10	2.87633e-11	0.000478374
1911	5.59497e-09	2.69128e-10	2.24273e-11	0.000372998
1912	6.94042e-09	3.33846e-10	2.78205e-11	0.000462694
1913	2.52929e-09	1.21663e-10	1.01386e-11	0.000168619
1914	5.48437e-09	2.63808e-10	2.1984e-11	0.000365625
1915	5.07385e-09	2.44061e-10	2.03384e-11	0.000338257
1916	5.78784e-09	2.78405e-10	2.32004e-11	0.000385856
1917	7.621e-09	3.66584e-10	3.05486e-11	0.000508067
1918	3.96685e-09	1.90813e-10	1.59011e-11	0.000264457
1919	9.90187e-09	4.76297e-10	3.96914e-11	0.000660124
1920	7.75207e-09	3.72888e-10	3.1074e-11	0.000516805
1921	6.69286e-09	3.21938e-10	2.68282e-11	0.000446191
1922	8.66394e-09	4.16751e-10	3.47292e-11	0.000577596
1923	8.20601e-09	3.94724e-10	3.28936e-11	0.000547067
1924	8.94429e-09	4.30236e-10	3.5853e-11	0.000596286
1925	7.61662e-09	3.66373e-10	3.05311e-11	0.000507775
1926	5.2003e-09	2.50143e-10	2.08453e-11	0.000346686
1927	2.5034e-09	1.20418e-10	1.00348e-11	0.000166894
1928	1.18718e-08	5.71053e-10	4.75877e-11	0.000791451
1929	1.12326e-08	5.40307e-10	4.50256e-11	0.000748839
1930	4.91771e-09	2.36551e-10	1.97126e-11	0.000327848
1931	5.65564e-09	2.72046e-10	2.26705e-11	0.000377043
1932	7.41303e-09	3.5658e-10	2.9715e-11	0.000494202
1933	8.53398e-09	4.105e-10	3.42083e-11	0.000568932
1934	1.10563e-08	5.3183e-10	4.43191e-11	0.00073709
1935	7.80952e-09	3.75652e-10	3.13043e-11	0.000520635
1936	3.15837e-09	1.51923e-10	1.26602e-11	0.000210558
1937	9.23606e-09	4.44271e-10	3.70226e-11	0.000615737
1938	1.19731e-08	5.75928e-10	4.7994e-11	0.000798208
1939	6.0882e-09	2.92853e-10	2.44044e-11	0.00040588
1940	6.04301e-09	2.90679e-10	2.42233e-11	0.000402867
1941	6.6227e-09	3.18563e-10	2.6547e-11	0.000441513
1942	1.16187e-08	5.58878e-10	4.65732e-11	0.000774577
1943	3.43909e-09	1.65426e-10	1.37855e-11	0.000229273
1944	5.33464e-09	2.56606e-10	2.13838e-11	0.000355643
1945	4.78533e-09	2.30183e-10	1.91819e-11	0.000319022
1946	1.44241e-08	6.93823e-10	5.78186e-11	0.000961605
1947	1.38952e-08	6.68386e-10	5.56988e-11	0.000926349
1948	8.19195e-09	3.94047e-10	3.28373e-11	0.00054613
1949	9.25904e-09	4.45376e-10	3.71147e-11	0.000617269
1950	6.30109e-09	3.03094e-10	2.52578e-11	0.000420073
1951	2.2161e-09	1.06598e-10	8.8832e-12	0.00014774
1952	7.9345e-09	3.81663e-10	3.18053e-11	0.000528967
1953	5.63672e-09	2.71136e-10	2.25947e-11	0.000375781
1954	7.01367e-09	3.3737e-10	2.81142e-11	0.000467578
1955	5.49237e-09	2.64193e-10	2.2016e-11	0.000366158
1956	9.34648e-09	4.49582e-10	3.74652e-11	0.000623099
1957	7.53641e-09	3.62515e-10	3.02096e-11	0.000502427
1958	7.8905e-09	3.79547e-10	3.16289e-11	0.000526034
1959	5.19504e-09	2.49891e-10	2.08242e-11	0.000346336
1960	1.16931e-08	5.62459e-10	4.68715e-11	0.00077954
1961	5.41122e-09	2.60289e-10	2.16908e-11	0.000360748
1962	1.25544e-08	6.03891e-10	5.03242e-11	0.000836963
1963	5.12699e-09	2.46617e-10	2.05514e-11	0.000341799
1964	3.53119e-09	1.69856e-10	1.41547e-11	0.000235412
1965	6.58753e-09	3.16872e-10	2.6406e-11	0.000439169
1966	1.09535e-08	5.26883e-10	4.39069e-11	0.000730233
1967	6.24236e-09	3.00269e-10	2.50224e-11	0.000416157
1968	5.97793e-09	2.87549e-10	2.39624e-11	0.000398529
1969	9.92512e-09	4.77416e-10	3.97846e-11	0.000661674
1970	2.87537e-09	1.3831e-10	1.15258e-11	0.000191691
1971	1.45409e-08	6.99441e-10	5.82868e-11	0.000969391
1972	6.68613e-09	3.21614e-10	2.68012e-11	0.000445742
1973	8.91353e-09	4.28757e-10	3.57297e-11	0.000594235
1974	6.97303e-09	3.35415e-10	2.79513e-11	0.000464869
1975	6.3286e-09	3.04417e-10	2.53681e-11	0.000421907
1976	4.15818e-09	2.00016e-10	1.6668e-11	0.000277212
1977	3.98677e-09	1.91771e-10	1.59809e-11	0.000265785
1978	5.25429e-09	2.5274e-10	2.10617e-11	0.000350286
1979	1.25875e-08	6.05479e-10	5.04566e-11	0.000839164
1980	4.84485e-09	2.33046e-10	1.94205e-11	0.00032299
1981	5.41583e-09	2.60511e-10	2.17092e-11	0.000361055
1982	8.97949e-09	4.31929e-10	3.59941e-11	0.000598633
1983	3.58724e-09	1.72552e-10	1.43794e-11	0.000239149
1984	1.37468e-08	6.61245e-10	5.51038e-11	0.000916453
1985	6.66808e-09	3.20747e-10	2.67289e-11	0.000444539
1986	7.7782e-09	3.74145e-10	3.11788e-11	0.000518547
1987	8.2786e-09	3.98215e-10	3.31846e-11	0.000551907
1988	4.58494e-09	2.20544e-10	1.83786e-11	0.000305662
1989	1.23524e-08	5.94171e-10	4.95143e-11	0.000823492
1990	3.23346e-09	1.55535e-10	1.29612e-11	0.000215564
1991	4.60203e-09	2.21366e-10	1.84472e-11	0.000306802
1992	5.54539e-09	2.66743e-10	2.22286e-11	0.000369692
1993	4.00314e-09	1.92558e-10	1.60465e-11	0.000266876
1994	3.25268e-09	1.5646e-10	1.30383e-11	0.000216845
1995	5.1597e-09	2.48191e-10	2.06825e-11	0.00034398
1996	4.90808e-09	2.36087e-10	1.96739e-11	0.000327205
1997	5.59847e-09	2.69296e-10	2.24414e-11	0.000373231
1998	8.04292e-09	3.86879e-10	3.22399e-11	0.000536195
1999	4.54939e-09	2.18834e-10	1.82361e-11	0.000303292
[truncated: 8,001 more rows]
