# Supplementary material for: Health risk assessment from habitants of Araró, Michoacán, México, exposed to arsenic by dust, using Monte Carlo probabilistic method
Source: PeerJ. 2025 Jun 10;13:e18805. doi: 10.7717/peerj.18805 (PMC12164815; doi:10.7717/peerj.18805)
Supplement: Supplemental Information 11 [file peerj-13-18805-s011.xlsx]

## Sheet: Risk Premises
Study Title:	Dermico premisas simulación.					Last simulation run:
Study File:	Dermico premisas simulación.xlsx					2022-11-04 21:22:26
	Output Cells	Histogram settings				Multi-cell output range names
Description for Reports	Range Names	Min value	Max value	Step size		title row or column (optional)
	ADD	Auto	Auto	Auto
	ADDc	Auto	Auto	Auto
	CR	Auto	Auto	Auto
	HQ	Auto	Auto	Auto
		Study	Min				Max
	Input Cells	File	Allowed		Expected		Allowed
Description for Reports	Range Names	Values	Values	10/90	Values	90/10	Values	Distributions	Parameters and chart settings
	BW	60.91	25.9	41.0554	61.63	82.3058	158.4	Normal	Mean	60.91	std dev	16.5625	X Axis Min	auto	X Axis Max	auto
	Conc	15.6	5.94	10.1171	15.7996	21.5085	42.53	Normal	Mean	15.6	std dev	4.57375	X Axis Min	auto	X Axis Max	auto
	ED	15.88	13	14.9189	15.8801	16.8415	19	Normal	Mean	15.88	std dev	0.75	X Axis Min	auto	X Axis Max	auto

## Sheet: Simulation Summary
	10000	Simulations run
					Change in expected values as simulations increase									Change in standard deviation as simulations increase
	Minimum result	Maximum result	Expected value	Std deviation	125	250	500	1000	2000	4000	8000	10000		125	250	500	1000	2000	4000	8000	10000
ADD	2.44694e-06	3.79511e-05	1.1591e-05	4.81918e-06	-	0.00849654	-0.0234663	-0.00477051	0.0159359	0.00414166	0.000104724	0.00248871		-	-0.0519493	-0.0246317	-0.0488151	0.0223882	0.0138883	-0.00063404	0.0105368
ADDc	1.64569e-06	2.5524e-05	7.7955e-06	3.24113e-06	-	0.00849654	-0.0234663	-0.00477051	0.0159359	0.00414166	0.000104724	0.00248871		-	-0.0519493	-0.0246317	-0.0488151	0.0223882	0.0138883	-0.00063404	0.0105368
CR	1.09712e-06	1.7016e-05	5.197e-06	2.16075e-06	-	0.00849654	-0.0234663	-0.00477051	0.0159359	0.00414166	0.000104724	0.00248871		-	-0.0519493	-0.0246317	-0.0488151	0.0223882	0.0138883	-0.00063404	0.0105368
HQ	0.00815646	0.126504	0.0386366	0.0160639	-	0.00849654	-0.0234663	-0.00477051	0.0159359	0.00414166	0.000104724	0.00248871		-	-0.0519493	-0.0246317	-0.0488151	0.0223882	0.0138883	-0.00063404	0.0105368

## Sheet: Simulation variance
This worksheet shows the convergence of the output variables as a function of the number of simulations
You should run enough simulations until the % change is very small, typically < 1.0%
ADD
	# of Sims	125	250	500	1000	2000	4000	8000	10000
	Avg Value	1.15624e-05	1.16607e-05	1.1387e-05	1.13327e-05	1.15133e-05	1.1561e-05	1.15622e-05	1.1591e-05
	% Chg		0.00849654	-0.0234663	-0.00477051	0.0159359	0.00414166	0.000104724	0.00248871
	Std Dev.	5.23389e-06	4.962e-06	4.83978e-06	4.60352e-06	4.70659e-06	4.77195e-06	4.76893e-06	4.81918e-06
	% Chg		-0.0519493	-0.0246317	-0.0488151	0.0223882	0.0138883	-0.00063404	0.0105368
ADDc
	# of Sims	125	250	500	1000	2000	4000	8000	10000
	Avg Value	7.77629e-06	7.84237e-06	7.65833e-06	7.6218e-06	7.74326e-06	7.77533e-06	7.77614e-06	7.7955e-06
	% Chg		0.00849654	-0.0234663	-0.00477051	0.0159359	0.00414166	0.000104724	0.00248871
	Std Dev.	3.52005e-06	3.33719e-06	3.25499e-06	3.09609e-06	3.16541e-06	3.20937e-06	3.20734e-06	3.24113e-06
	% Chg		-0.0519493	-0.0246317	-0.0488151	0.0223882	0.0138883	-0.00063404	0.0105368
CR
	# of Sims	125	250	500	1000	2000	4000	8000	10000
	Avg Value	5.1842e-06	5.22824e-06	5.10556e-06	5.0812e-06	5.16217e-06	5.18355e-06	5.1841e-06	5.197e-06
	% Chg		0.00849654	-0.0234663	-0.00477051	0.0159359	0.00414166	0.000104724	0.00248871
	Std Dev.	2.3467e-06	2.22479e-06	2.16999e-06	2.06406e-06	2.11027e-06	2.13958e-06	2.13822e-06	2.16075e-06
	% Chg		-0.0519493	-0.0246317	-0.0488151	0.0223882	0.0138883	-0.00063404	0.0105368
HQ
	# of Sims	125	250	500	1000	2000	4000	8000	10000
	Avg Value	0.0385414	0.0388689	0.0379568	0.0377757	0.0383777	0.0385366	0.0385407	0.0386366
	% Chg		0.00849654	-0.0234663	-0.00477051	0.0159359	0.00414166	0.000104724	0.00248871
	Std Dev.	0.0174463	0.01654	0.0161326	0.0153451	0.0156886	0.0159065	0.0158964	0.0160639
	% Chg		-0.0519493	-0.0246317	-0.0488151	0.0223882	0.0138883	-0.00063404	0.0105368

## Sheet: ADD Results
ADD Results
Minimum result	2.44694e-06				1.07571e-05	Study value
Maximum result	3.79511e-05				0.5021	of results are equal or lower
Expected value	1.1591e-05				0.4979	of results are equal or greater
Std Deviation	4.81918e-06
Out of 10000 simulations		Of those with numeric values:
10000 had numeric values.			5% <=	5.35994e-06
0 had error values.			10% <=	6.36742e-06
			15% <=	7.08624e-06
			20% <=	7.6753e-06
			25% <=	8.20145e-06
			30% <=	8.73073e-06
			35% <=	9.23128e-06
			40% <=	9.77738e-06
			45% <=	1.02288e-05
			50% <=	1.07337e-05
			55% <=	1.12979e-05
			60% <=	1.186e-05
			65% <=	1.24777e-05
			70% <=	1.31648e-05
			75% <=	1.39442e-05
			80% <=	1.49439e-05
			85% <=	1.61263e-05
			90% <=	1.78432e-05
			95% <=	2.06296e-05
			100% <=	3.79511e-05
If ADD is:				1.07571e-05	0.5021	of results are equal or lower
(Chg to do what ifs)					0.4979	of results are greater
					Cumulative				Cumulative
ADD	frequency:				frequency:				frequency:
<=2.44694E-06	1	0.0001		<=2.44694E-06	1	0.0001		=>2.44694E-06	10000	1
2.44694E-06 to 4.31558E-06	158	0.0158		<=4.31558E-06	159	0.0159		=>4.31558E-06	9841	0.9841
4.31558E-06 to 6.18422E-06	748	0.0748		<=6.18422E-06	907	0.0907		=>6.18422E-06	9093	0.9093
6.18422E-06 to 8.05286E-06	1441	0.1441		<=8.05286E-06	2348	0.2348		=>8.05286E-06	7652	0.7652
8.05286E-06 to 9.9215E-06	1787	0.1787		<=9.9215E-06	4135	0.4135		=>9.9215E-06	5865	0.5865
9.9215E-06 to 1.17901E-05	1804	0.1804		<=1.17901E-05	5939	0.5939		=>1.17901E-05	4061	0.4061
1.17901E-05 to 1.36588E-05	1383	0.1383		<=1.36588E-05	7322	0.7322		=>1.36588E-05	2678	0.2678
1.36588E-05 to 1.55274E-05	944	0.0944		<=1.55274E-05	8266	0.8266		=>1.55274E-05	1734	0.1734
1.55274E-05 to 1.73961E-05	617	0.0617		<=1.73961E-05	8883	0.8883		=>1.73961E-05	1117	0.1117
1.73961E-05 to 1.92647E-05	404	0.0404		<=1.92647E-05	9287	0.9287		=>1.92647E-05	713	0.0713
1.92647E-05 to 2.11334E-05	262	0.0262		<=2.11334E-05	9549	0.9549		=>2.11334E-05	451	0.0451
2.11334E-05 to 2.3002E-05	167	0.0167		<=2.3002E-05	9716	0.9716		=>2.3002E-05	284	0.0284
2.3002E-05 to 2.48706E-05	93	0.0093		<=2.48706E-05	9809	0.9809		=>2.48706E-05	191	0.0191
2.48706E-05 to 2.67393E-05	77	0.0077		<=2.67393E-05	9886	0.9886		=>2.67393E-05	114	0.0114
2.67393E-05 to 2.86079E-05	34	0.0034		<=2.86079E-05	9920	0.992		=>2.86079E-05	80	0.008
2.86079E-05 to 3.04766E-05	39	0.0039		<=3.04766E-05	9959	0.9959		=>3.04766E-05	41	0.0041
3.04766E-05 to 3.23452E-05	13	0.0013		<=3.23452E-05	9972	0.9972		=>3.23452E-05	28	0.0028
3.23452E-05 to 3.42138E-05	12	0.0012		<=3.42138E-05	9984	0.9984		=>3.42138E-05	16	0.0016
3.42138E-05 to 3.60825E-05	11	0.0011		<=3.60825E-05	9995	0.9995		=>3.60825E-05	5	0.0005
3.60825E-05 to 3.79511E-05	5	0.0005		<=3.79511E-05	10000	1		=>3.79511E-05	1	0.0001
>3.79511E-05	0	0
Bin Size	1.86864e-06
Number of bins	21
# of Sims	Avg Value	% Chg		Std Dev.	% Chg
125	1.15624e-05			5.23389e-06
250	1.16607e-05	0.00849654		4.962e-06	-0.0519493
500	1.1387e-05	-0.0234663		4.83978e-06	-0.0246317
1000	1.13327e-05	-0.00477051		4.60352e-06	-0.0488151
2000	1.15133e-05	0.0159359		4.70659e-06	0.0223882
4000	1.1561e-05	0.00414166		4.77195e-06	0.0138883
8000	1.15622e-05	0.000104724		4.76893e-06	-0.00063404
10000	1.1591e-05	0.00248871		4.81918e-06	0.0105368

## Sheet: ADDc Results
ADDc Results
Minimum result	1.64569e-06				7.23468e-06	Study value
Maximum result	2.5524e-05				0.5021	of results are equal or lower
Expected value	7.7955e-06				0.4979	of results are equal or greater
Std Deviation	3.24113e-06
Out of 10000 simulations		Of those with numeric values:
10000 had numeric values.			5% <=	3.60482e-06
0 had error values.			10% <=	4.2824e-06
			15% <=	4.76584e-06
			20% <=	5.16202e-06
			25% <=	5.51588e-06
			30% <=	5.87184e-06
			35% <=	6.20849e-06
			40% <=	6.57577e-06
			45% <=	6.87934e-06
			50% <=	7.21895e-06
			55% <=	7.59841e-06
			60% <=	7.97645e-06
			65% <=	8.39185e-06
			70% <=	8.85397e-06
			75% <=	9.37814e-06
			80% <=	1.00505e-05
			85% <=	1.08457e-05
			90% <=	1.20004e-05
			95% <=	1.38744e-05
			100% <=	2.5524e-05
If ADDc is:				7.23468e-06	0.5021	of results are equal or lower
(Chg to do what ifs)					0.4979	of results are greater
					Cumulative				Cumulative
ADDc	frequency:				frequency:				frequency:
<=1.64569E-06	1	0.0001		<=1.64569E-06	1	0.0001		=>1.64569E-06	10000	1
1.64569E-06 to 2.90244E-06	158	0.0158		<=2.90244E-06	159	0.0159		=>2.90244E-06	9841	0.9841
2.90244E-06 to 4.15919E-06	748	0.0748		<=4.15919E-06	907	0.0907		=>4.15919E-06	9093	0.9093
4.15919E-06 to 5.41594E-06	1441	0.1441		<=5.41594E-06	2348	0.2348		=>5.41594E-06	7652	0.7652
5.41594E-06 to 6.6727E-06	1787	0.1787		<=6.6727E-06	4135	0.4135		=>6.6727E-06	5865	0.5865
6.6727E-06 to 7.92945E-06	1804	0.1804		<=7.92945E-06	5939	0.5939		=>7.92945E-06	4061	0.4061
7.92945E-06 to 9.1862E-06	1383	0.1383		<=9.1862E-06	7322	0.7322		=>9.1862E-06	2678	0.2678
9.1862E-06 to 1.0443E-05	944	0.0944		<=1.0443E-05	8266	0.8266		=>1.0443E-05	1734	0.1734
1.0443E-05 to 1.16997E-05	617	0.0617		<=1.16997E-05	8883	0.8883		=>1.16997E-05	1117	0.1117
1.16997E-05 to 1.29565E-05	404	0.0404		<=1.29565E-05	9287	0.9287		=>1.29565E-05	713	0.0713
1.29565E-05 to 1.42132E-05	262	0.0262		<=1.42132E-05	9549	0.9549		=>1.42132E-05	451	0.0451
1.42132E-05 to 1.547E-05	167	0.0167		<=1.547E-05	9716	0.9716		=>1.547E-05	284	0.0284
1.547E-05 to 1.67267E-05	93	0.0093		<=1.67267E-05	9809	0.9809		=>1.67267E-05	191	0.0191
1.67267E-05 to 1.79835E-05	77	0.0077		<=1.79835E-05	9886	0.9886		=>1.79835E-05	114	0.0114
1.79835E-05 to 1.92402E-05	34	0.0034		<=1.92402E-05	9920	0.992		=>1.92402E-05	80	0.008
1.92402E-05 to 2.0497E-05	39	0.0039		<=2.0497E-05	9959	0.9959		=>2.0497E-05	41	0.0041
2.0497E-05 to 2.17537E-05	13	0.0013		<=2.17537E-05	9972	0.9972		=>2.17537E-05	28	0.0028
2.17537E-05 to 2.30105E-05	12	0.0012		<=2.30105E-05	9984	0.9984		=>2.30105E-05	16	0.0016
2.30105E-05 to 2.42672E-05	11	0.0011		<=2.42672E-05	9995	0.9995		=>2.42672E-05	5	0.0005
2.42672E-05 to 2.5524E-05	5	0.0005		<=2.5524E-05	10000	1		=>2.5524E-05	1	0.0001
>2.5524E-05	0	0
Bin Size	1.25675e-06
Number of bins	21
# of Sims	Avg Value	% Chg		Std Dev.	% Chg
125	7.77629e-06			3.52005e-06
250	7.84237e-06	0.00849654		3.33719e-06	-0.0519493
500	7.65833e-06	-0.0234663		3.25499e-06	-0.0246317
1000	7.6218e-06	-0.00477051		3.09609e-06	-0.0488151
2000	7.74326e-06	0.0159359		3.16541e-06	0.0223882
4000	7.77533e-06	0.00414166		3.20937e-06	0.0138883
8000	7.77614e-06	0.000104724		3.20734e-06	-0.00063404
10000	7.7955e-06	0.00248871		3.24113e-06	0.0105368

## Sheet: CR Results
CR Results
Minimum result	1.09712e-06				4.82312e-06	Study value
Maximum result	1.7016e-05				0.5021	of results are equal or lower
Expected value	5.197e-06				0.4979	of results are equal or greater
Std Deviation	2.16075e-06
Out of 10000 simulations		Of those with numeric values:
10000 had numeric values.			5% <=	2.40321e-06
0 had error values.			10% <=	2.85494e-06
			15% <=	3.17723e-06
			20% <=	3.44134e-06
			25% <=	3.67725e-06
			30% <=	3.91456e-06
			35% <=	4.13899e-06
			40% <=	4.38385e-06
			45% <=	4.58623e-06
			50% <=	4.81263e-06
			55% <=	5.06561e-06
			60% <=	5.31763e-06
			65% <=	5.59457e-06
			70% <=	5.90265e-06
			75% <=	6.25209e-06
			80% <=	6.70033e-06
			85% <=	7.23049e-06
			90% <=	8.0003e-06
			95% <=	9.24961e-06
			100% <=	1.7016e-05
If CR is:				4.82312e-06	0.5021	of results are equal or lower
(Chg to do what ifs)					0.4979	of results are greater
					Cumulative				Cumulative
CR	frequency:				frequency:				frequency:
<=1.09712E-06	1	0.0001		<=1.09712E-06	1	0.0001		=>1.09712E-06	10000	1
1.09712E-06 to 1.93496E-06	158	0.0158		<=1.93496E-06	159	0.0159		=>1.93496E-06	9841	0.9841
1.93496E-06 to 2.77279E-06	748	0.0748		<=2.77279E-06	907	0.0907		=>2.77279E-06	9093	0.9093
2.77279E-06 to 3.61063E-06	1441	0.1441		<=3.61063E-06	2348	0.2348		=>3.61063E-06	7652	0.7652
3.61063E-06 to 4.44846E-06	1787	0.1787		<=4.44846E-06	4135	0.4135		=>4.44846E-06	5865	0.5865
4.44846E-06 to 5.2863E-06	1804	0.1804		<=5.2863E-06	5939	0.5939		=>5.2863E-06	4061	0.4061
5.2863E-06 to 6.12414E-06	1383	0.1383		<=6.12414E-06	7322	0.7322		=>6.12414E-06	2678	0.2678
6.12414E-06 to 6.96197E-06	944	0.0944		<=6.96197E-06	8266	0.8266		=>6.96197E-06	1734	0.1734
6.96197E-06 to 7.79981E-06	617	0.0617		<=7.79981E-06	8883	0.8883		=>7.79981E-06	1117	0.1117
7.79981E-06 to 8.63764E-06	404	0.0404		<=8.63764E-06	9287	0.9287		=>8.63764E-06	713	0.0713
8.63764E-06 to 9.47548E-06	262	0.0262		<=9.47548E-06	9549	0.9549		=>9.47548E-06	451	0.0451
9.47548E-06 to 1.03133E-05	167	0.0167		<=1.03133E-05	9716	0.9716		=>1.03133E-05	284	0.0284
1.03133E-05 to 1.11511E-05	93	0.0093		<=1.11511E-05	9809	0.9809		=>1.11511E-05	191	0.0191
1.11511E-05 to 1.1989E-05	77	0.0077		<=1.1989E-05	9886	0.9886		=>1.1989E-05	114	0.0114
1.1989E-05 to 1.28268E-05	34	0.0034		<=1.28268E-05	9920	0.992		=>1.28268E-05	80	0.008
1.28268E-05 to 1.36647E-05	39	0.0039		<=1.36647E-05	9959	0.9959		=>1.36647E-05	41	0.0041
1.36647E-05 to 1.45025E-05	13	0.0013		<=1.45025E-05	9972	0.9972		=>1.45025E-05	28	0.0028
1.45025E-05 to 1.53403E-05	12	0.0012		<=1.53403E-05	9984	0.9984		=>1.53403E-05	16	0.0016
1.53403E-05 to 1.61782E-05	11	0.0011		<=1.61782E-05	9995	0.9995		=>1.61782E-05	5	0.0005
1.61782E-05 to 1.7016E-05	5	0.0005		<=1.7016E-05	10000	1		=>1.7016E-05	1	0.0001
>1.7016E-05	0	0
Bin Size	8.37835e-07
Number of bins	21
# of Sims	Avg Value	% Chg		Std Dev.	% Chg
125	5.1842e-06			2.3467e-06
250	5.22824e-06	0.00849654		2.22479e-06	-0.0519493
500	5.10556e-06	-0.0234663		2.16999e-06	-0.0246317
1000	5.0812e-06	-0.00477051		2.06406e-06	-0.0488151
2000	5.16217e-06	0.0159359		2.11027e-06	0.0223882
4000	5.18355e-06	0.00414166		2.13958e-06	0.0138883
8000	5.1841e-06	0.000104724		2.13822e-06	-0.00063404
10000	5.197e-06	0.00248871		2.16075e-06	0.0105368

## Sheet: HQ Results
HQ Results
Minimum result	0.00815646				0.035857	Study value
Maximum result	0.126504				0.5021	of results are equal or lower
Expected value	0.0386366				0.4979	of results are equal or greater
Std Deviation	0.0160639
Out of 10000 simulations		Of those with numeric values:
10000 had numeric values.			5% <=	0.0178665
0 had error values.			10% <=	0.0212247
			15% <=	0.0236208
			20% <=	0.0255843
			25% <=	0.0273382
			30% <=	0.0291024
			35% <=	0.0307709
			40% <=	0.0325913
			45% <=	0.0340959
			50% <=	0.0357791
			55% <=	0.0376598
			60% <=	0.0395334
			65% <=	0.0415922
			70% <=	0.0438827
			75% <=	0.0464806
			80% <=	0.049813
			85% <=	0.0537544
			90% <=	0.0594774
			95% <=	0.0687653
			100% <=	0.126504
If HQ is:				0.035857	0.5021	of results are equal or lower
(Chg to do what ifs)					0.4979	of results are greater
					Cumulative				Cumulative
HQ	frequency:				frequency:				frequency:
<=0.008156462	1	0.0001		<=0.008156462	1	0.0001		=>0.008156462	10000	1
0.008156462 to 0.014385266	158	0.0158		<=0.014385266	159	0.0159		=>0.014385266	9841	0.9841
0.014385266 to 0.02061407	748	0.0748		<=0.02061407	907	0.0907		=>0.02061407	9093	0.9093
0.02061407 to 0.026842874	1441	0.1441		<=0.026842874	2348	0.2348		=>0.026842874	7652	0.7652
0.026842874 to 0.033071678	1787	0.1787		<=0.033071678	4135	0.4135		=>0.033071678	5865	0.5865
0.033071678 to 0.039300482	1804	0.1804		<=0.039300482	5939	0.5939		=>0.039300482	4061	0.4061
0.039300482 to 0.045529286	1383	0.1383		<=0.045529286	7322	0.7322		=>0.045529286	2678	0.2678
0.045529286 to 0.05175809	944	0.0944		<=0.05175809	8266	0.8266		=>0.05175809	1734	0.1734
0.05175809 to 0.057986894	617	0.0617		<=0.057986894	8883	0.8883		=>0.057986894	1117	0.1117
0.057986894 to 0.064215699	404	0.0404		<=0.064215699	9287	0.9287		=>0.064215699	713	0.0713
0.064215699 to 0.070444503	262	0.0262		<=0.070444503	9549	0.9549		=>0.070444503	451	0.0451
0.070444503 to 0.076673307	167	0.0167		<=0.076673307	9716	0.9716		=>0.076673307	284	0.0284
0.076673307 to 0.082902111	93	0.0093		<=0.082902111	9809	0.9809		=>0.082902111	191	0.0191
0.082902111 to 0.089130915	77	0.0077		<=0.089130915	9886	0.9886		=>0.089130915	114	0.0114
0.089130915 to 0.095359719	34	0.0034		<=0.095359719	9920	0.992		=>0.095359719	80	0.008
0.095359719 to 0.101588523	39	0.0039		<=0.101588523	9959	0.9959		=>0.101588523	41	0.0041
0.101588523 to 0.107817327	13	0.0013		<=0.107817327	9972	0.9972		=>0.107817327	28	0.0028
0.107817327 to 0.114046131	12	0.0012		<=0.114046131	9984	0.9984		=>0.114046131	16	0.0016
0.114046131 to 0.120274935	11	0.0011		<=0.120274935	9995	0.9995		=>0.120274935	5	0.0005
0.120274935 to 0.12650374	5	0.0005		<=0.12650374	10000	1		=>0.12650374	1	0.0001
>0.12650374	0	0
Bin Size	0.0062288
Number of bins	21
# of Sims	Avg Value	% Chg		Std Dev.	% Chg
125	0.0385414			0.0174463
250	0.0388689	0.00849654		0.01654	-0.0519493
500	0.0379568	-0.0234663		0.0161326	-0.0246317
1000	0.0377757	-0.00477051		0.0153451	-0.0488151
2000	0.0383777	0.0159359		0.0156886	0.0223882
4000	0.0385366	0.00414166		0.0159065	0.0138883
8000	0.0385407	0.000104724		0.0158964	-0.00063404
10000	0.0386366	0.00248871		0.0160639	0.0105368

## Sheet: Simulation Input Values 1
Sim #	BW	Conc	ED
1	81.1129	19.6492	15.3961
2	69.74	18.0271	16.1734
3	43.5491	8.64164	16.498
4	39.2551	21.501	16.5077
5	78.024	14.5435	16.4709
6	85.5792	13.8682	15.7692
7	52.7025	18.4792	14.6541
8	50.5914	13.4679	15.8696
9	67.4418	8.92916	15.5203
10	61.8129	19.1732	15.4885
11	29.9823	14.7274	15.195
12	31.9265	12.7232	16.1068
13	44.4251	17.5378	17.1698
14	39.3979	13.3012	16.3256
15	61.6849	14.9255	15.7645
16	38.4328	14.5203	14.8791
17	74.7736	13.6014	17.1527
18	78.5813	15.7906	15.6504
19	58.9104	17.8437	15.5052
20	56.6074	15.2238	16.2445
21	58.0268	22.2961	15.7505
22	55.5547	21.0379	15.4582
23	59.3949	11.8133	16.6897
24	46.8941	15.0153	15.5589
25	59.1282	17.8831	15.6281
26	66.6732	17.0248	15.3359
27	79.9385	23.7361	15.6081
28	42.277	10.2696	16.1962
29	45.6057	10.979	16.6363
30	54.6079	19.5151	15.7903
31	68.6314	21.9936	15.0218
32	67.9506	18.7721	16.5109
33	56.784	13.6362	15.9031
34	60.466	18.1121	15.9502
35	73.6521	13.2946	16.1688
36	73.6388	9.92168	15.7171
37	52.5117	10.4503	15.5807
38	37.3146	14.8865	16.1095
39	59.5249	11.5119	17.0502
40	80.1391	17.3752	14.2838
41	62.8118	6.04095	16.087
42	49.7499	19.0547	16.4867
43	44.5015	12.3039	15.0811
44	90.3054	8.75043	15.8921
45	65.6331	23.6631	14.9338
46	62.8582	13.0975	16.4299
47	56.3316	19.5558	15.6828
48	34.6778	24.4547	17.2543
49	58.5599	16.547	16.1602
50	59.055	18.1528	16.5781
51	30.0512	11.9748	17.0461
52	80.0786	21.7698	16.2986
53	51.4194	16.6167	16.5176
54	47.6412	15.7643	17.1344
55	73.9418	13.0223	15.8369
56	72.1473	16.5068	16.0403
57	74.2708	14.915	16.748
58	77.7	19.4379	15.4757
59	83.8431	11.0869	16.4628
60	74.6735	13.3982	15.8869
61	56.5813	12.9062	15.0703
62	59.8742	14.3599	16.533
63	49.3945	13.6436	15.9885
64	53.9697	20.0865	15.3952
65	84.2538	9.3921	15.5294
66	78.8614	11.9016	15.2194
67	54.9949	23.2023	15.9742
68	64.1184	12.059	15.9929
69	57.6206	10.3652	15.5526
70	46.6348	20.4958	14.6197
71	42.3556	13.982	16.853
72	61.7486	10.5361	15.5523
73	52.7614	16.6925	15.4006
74	43.7321	15.6442	15.5311
75	57.5684	21.713	16.4307
76	43.5257	13.5974	15.3986
77	70.3344	16.2451	16.0808
78	45.7176	24.8194	17.18
79	37.2193	25.3284	15.16
80	76.8295	14.1151	16.0608
81	37.5182	10.0273	16.387
82	35.2836	10.5631	16.6016
83	45.0624	13.3755	14.9228
84	66.026	11.57	14.4531
85	76.0105	18.1143	16.2596
86	59.4338	21.8135	15.8282
87	61.6113	21.4935	15.0463
88	59.6625	19.4344	15.8436
89	55.2724	9.82519	15.0905
90	87.7198	17.905	15.2425
91	81.7472	20.3618	16.4429
92	76.6389	17.1464	13.5827
93	60.6892	14.4655	17.1366
94	44.98	20.4658	17.4132
95	60.2267	7.47729	14.9733
96	78.7291	10.7249	15.718
97	44.8627	14.4601	16.1919
98	68.3471	11.7786	14.9603
99	54.1583	15.1861	16.0371
100	89.3181	9.17181	16.197
101	99.8942	23.7326	16.1235
102	64.2764	19.6788	14.3797
103	40.3631	14.5134	16.4833
104	98.5786	19.1555	16.9291
105	81.6139	26.6857	14.7405
106	58.328	15.4287	14.436
107	74.2303	6.63037	16.2488
108	73.383	18.3305	17.0324
109	32.4673	17.7648	15.5682
110	53.8152	14.3011	15.4715
111	75.7981	12.1324	14.0204
112	76.2545	13.4724	16.2172
113	98.4725	15.7975	15.3898
114	107.386	9.3244	15.55
115	72.6151	21.7934	15.5206
116	90.4531	10.5625	15.2892
117	55.3807	11.113	16.2776
118	50.2978	12.4697	16.3595
119	65.1484	22.6416	15.5749
120	53.2291	15.5731	16.0005
121	73.0412	14.258	15.9457
122	27.462	22.5499	15.8949
123	62.4166	10.9307	15.6547
124	81.5023	15.1296	15.6903
125	77.9182	10.4393	14.9082
126	69.1663	16.8359	15.2754
127	31.1201	16.5897	14.5818
128	74.6283	20.3794	16.1985
129	59.8931	18.4635	16.0106
130	45.0133	12.4655	16.569
131	54.9987	21.2363	14.5517
132	75.9489	15.624	15.5237
133	59.1179	18.2606	16.0218
134	78.782	12.7463	16.9311
135	51.1889	14.8286	16.2988
136	53.9674	15.8341	16.6182
137	33.0601	20.9069	15.2509
138	48.0913	20.9994	16.232
139	41.1597	18.5843	16.3821
140	63.0615	14.0633	15.5484
141	43.8281	18.8293	15.0938
142	30.2424	11.3218	15.9607
143	60.3792	11.6857	15.6534
144	37.4143	17.5883	15.9633
145	83.5507	28.1923	16.0847
146	80.9093	17.4423	16.3035
147	80.0677	8.93396	15.6327
148	90.7593	11.6787	14.8769
149	76.4637	19.3802	14.6095
150	72.6088	14.6024	15.8713
151	75.439	10.3475	16.0492
152	56.8632	7.06279	16.7436
153	54.516	13.7381	16.5264
154	30.0164	17.9072	15.0342
155	49.1849	16.6181	16.2649
156	54.4533	10.8656	15.701
157	77.5925	13.9327	14.3515
158	54.449	16.8014	15.9966
159	47.0768	17.6821	15.3989
160	84.6312	14.0282	16.2382
161	98.7311	18.4425	15.2716
162	64.8911	11.456	16.1051
163	56.9351	17.9978	14.5093
164	75.766	19.6146	16.3778
165	55.018	17.7696	16.893
166	64.3195	17.8209	15.8148
167	62.3887	7.64095	16.0015
168	52.84	19.4075	14.8769
169	44.4305	16.0983	15.4993
170	47.9419	9.05472	15.1307
171	65.7914	8.75555	15.754
172	65.6317	22.4155	15.573
173	46.7236	19.8201	14.7192
174	85.3743	18.7041	15.7629
175	65.7666	13.3187	16.3584
176	54.8556	15.2183	15.1815
177	41.7902	15.4835	15.7828
178	54.2309	15.9895	16.4428
179	52.6364	20.9512	16.5889
180	58.42	21.8497	15.8718
181	85.2469	15.9641	16.2785
182	46.5189	21.5529	16.1989
183	56.1063	10.7647	15.4554
184	33.1113	21.5746	16.6483
185	67.6759	18.5662	16.1249
186	60.8914	15.3814	15.2101
187	75.5241	17.3899	15.1516
188	88.6561	13.137	14.8941
189	57.058	18.9837	15.8063
190	103.396	18.8803	16.4684
191	58.1036	13.1129	15.8342
192	36.9219	15.9602	15.5714
193	63.2214	14.6935	17.3744
194	74.173	9.94443	15.5362
195	77.496	18.4331	16.8936
196	50.13	12.5744	14.917
197	49.4961	11.7383	16.6613
198	51.8384	24.027	15.6631
199	60.1578	9.01625	16.635
200	53.8396	11.0534	16.3156
201	41.7045	9.86232	15.4158
202	56.3265	14.1071	16.5558
203	74.3924	16.1247	15.7167
204	40.6845	8.15958	15.5282
205	68.8106	19.1218	16.7124
206	68.0629	15.7934	16.8415
207	81.2457	17.8391	15.7452
208	60.6215	14.1575	16.2416
209	53.1935	14.618	14.7543
210	60.6977	15.5776	15.5139
211	53.7935	8.60804	17.0159
212	76.4648	16.4064	15.4307
213	74.2899	7.67611	16.5934
214	29.8115	11.291	15.2343
215	70.4174	16.4775	15.1273
216	66.1223	15.9587	14.8307
217	33.7968	24.3445	16.1748
218	59.4305	21.6049	16.1547
219	46.146	15.3185	15.4595
220	60.9393	20.3519	14.3415
221	51.8166	19.8741	14.9959
222	71.5551	19.5408	15.9054
223	65.6016	20.137	14.4411
224	62.3794	18.4409	15.1506
225	48.6946	17.1661	16.0028
226	62.3253	19.1014	15.4438
227	52.6696	14.3305	16.7475
228	45.0166	12.2436	16.1908
229	47.3875	15.5377	16.5612
230	43.4027	11.8795	14.7998
231	71.8897	16.7954	15.6054
232	52.6622	12.4802	16.3538
233	52.0741	18.3045	15.991
234	56.5652	19.1932	14.9499
235	41.2049	20.0606	15.6452
236	78.0536	16.4679	16.1818
237	64.1439	15.7016	14.7601
238	26.5705	12.0501	16.1596
239	70.8502	9.51988	14.9565
240	82.0108	14.9522	16.3974
241	84.1937	13.4026	16.8151
242	63.1305	13.5717	16.9746
243	74.4049	21.4773	15.704
244	64.3023	14.6245	15.9391
245	50.464	14.0135	15.2616
246	85.9341	11.4001	16.0328
247	67.6259	15.8438	16.6121
248	65.6711	19.5586	16.0405
249	55.0699	10.4907	15.2579
250	73.9357	20.2249	16.2636
251	71.3539	18.9526	15.6862
252	72.8805	16.546	15.5191
253	72.1659	24.288	15.7149
254	70.7566	8.86866	16.1269
255	77.8081	15.0771	14.5426
256	61.0537	10.8356	14.3185
257	45.6834	19.8873	15.2218
258	41.5005	14.9746	15.9898
259	67.0773	7.96411	14.5514
260	83.1639	15.0024	15.5084
261	60.3667	9.85961	15.8695
262	62.3057	24.8971	15.6735
263	64.8986	16.7323	17.0278
264	52.9494	17.7303	14.4484
265	77.8856	12.2259	15.3675
266	66.6841	13.6822	14.7484
267	36.8875	14.5664	15.8896
268	54.144	11.06	16.1827
269	60.7198	14.8422	17.0526
270	56.2183	13.585	14.886
271	71.1571	24.0818	17.48
272	47.13	14.8722	17.9773
273	70.2889	19.5211	15.8786
274	59.1526	17.2429	15.6032
275	40.2513	9.76904	16.0078
276	49.7857	17.2467	14.8783
277	36.4189	16.5495	15.661
278	81.3713	19.6814	15.1316
279	59.864	14.5699	15.0737
280	73.2758	9.74912	15.6683
281	81.4936	18.1229	17.2055
282	31.8207	15.4876	15.9188
283	91.8844	22.7495	15.3989
284	30.8612	11.7581	15.1831
285	26.0268	17.0514	14.9172
286	70.7735	21.1587	16.3214
287	85.6888	9.72102	15.6702
288	64.4398	15.4853	15.3577
289	72.6943	13.3343	14.5621
290	67.9375	16.0491	14.9353
291	62.1382	19.9633	15.6593
292	74.4003	7.73177	16.5259
293	44.6494	16.6387	15.8764
294	43.425	12.8508	14.9764
295	65.3224	7.30696	15.314
296	67.3807	8.71067	16.2279
297	59.4217	17.6701	14.4662
298	87.0896	15.0771	16.0766
299	74.5165	12.4586	13.9208
300	76.4317	18.8385	16.2696
301	77.7593	23.6141	16.1383
302	60.6173	15.1375	15.6362
303	80.5392	16.1425	15.1296
304	86.8666	14.7874	15.6751
305	57.1607	8.97071	16.1076
306	52.9112	14.67	17.2879
307	57.2063	18.6214	17.135
308	43.0324	20.1094	16.8549
309	57.5556	11.2445	16.2828
310	68.748	11.7309	16.3554
311	62.7571	19.3517	15.2922
312	79.7436	19.8247	15.1314
313	73.4586	15.3865	15.662
314	62.8262	17.1506	14.9473
315	45.0894	15.171	15.5429
316	87.298	10.846	15.4794
317	72.4208	9.96701	15.96
318	69.8963	10.8599	15.4057
319	50.3066	14.9315	16.5578
320	66.2476	13.6128	13.5027
321	37.0849	13.1652	15.3325
322	75.3662	14.1008	15.8765
323	65.5239	25.9741	15.1027
324	59.2408	9.27127	16.3669
325	65.8461	10.3401	15.0618
326	68.5845	18.7998	14.9252
327	50.373	14.3531	16.0722
328	79.1824	13.7392	15.4699
329	71.325	11.957	15.482
330	68.5262	8.98197	17.2547
331	94.06	8.73362	16.7306
332	84.7919	13.1445	16.4537
333	98.9793	8.81241	16.1209
334	72.2901	14.5558	14.1588
335	58.4086	17.268	13.872
336	69.6783	11.7287	15.0076
337	62.7926	14.2275	15.8667
338	60.2455	24.7474	16.4732
339	58.163	15.0889	16.9715
340	64.7693	13.1333	15.447
341	59.7814	10.4757	15.6886
342	34.0905	11.007	15.5602
343	50.4676	12.9415	15.3896
344	86.7552	26.1033	16.337
345	51.8271	22.9068	16.8308
346	60.5067	19.4125	15.4996
347	57.8582	13.3916	15.566
348	81.877	12.7923	15.2132
349	73.0735	18.133	16.4188
350	44.1714	18.7878	15.5029
351	62.2942	14.5847	15.9644
352	62.0182	14.1923	16.0996
353	90.7897	14.8196	15.7276
354	59.7845	18.0624	15.9171
355	60.1018	16.3977	16.5876
356	44.9947	18.5034	15.7706
357	62.1766	13.7644	16.0771
358	83.257	11.1733	15.9805
359	79.8649	17.4593	15.8924
360	32.8616	10.0428	14.6484
361	50.058	12.7336	15.4747
362	48.3624	19.8065	15.9914
363	69.5036	14.5626	15.5358
364	41.7425	7.73522	15.9011
365	79.1995	11.948	16.7662
366	85.5157	7.97118	16.0453
367	49.2233	17.4085	16.3469
368	48.2474	15.7158	16.0102
369	35.5725	12.6072	16.044
370	34.0926	18.297	15.2403
371	50.2877	19.3575	15.7965
372	55.5	20.5329	16.7416
373	76.9145	17.1737	15.0609
374	39.1379	12.7297	15.519
375	57.3675	16.1951	15.4183
376	57.763	24.3977	15.8261
377	96.4729	9.93998	16.2472
378	51.3408	22.6029	15.5845
379	85.0546	22.8498	14.7036
380	83.4236	17.8577	15.9325
381	87.689	16.4235	17.6367
382	32.7381	14.2852	15.943
383	61.3224	15.8223	14.9673
384	44.4145	15.3509	15.5366
385	76.1751	21.8239	16.562
386	72.1191	14.9972	15.999
387	62.4141	20.2562	16.2055
388	66.7028	13.975	15.8465
389	68.3581	10.3142	16.1433
390	69.189	11.4801	15.7461
391	59.3725	12.3652	16.2996
392	64.0498	9.25662	15.799
393	37.751	17.438	15.9303
394	52.9186	11.5624	15.956
395	60.9956	18.7453	14.3957
396	76.3261	15.9815	15.4076
397	85.5977	7.23335	15.5965
398	70.0966	10.4525	14.8254
399	62.6432	14.5765	15.8305
400	89.8773	14.6814	15.8214
401	59.6928	18.1465	15.2194
402	54.2731	16.159	16.0979
403	53.1105	17.8431	16.011
404	67.1222	11.6051	15.7227
405	64.8872	11.467	17.6233
406	32.3766	21.5449	17.1423
407	77.4561	12.5007	15.3824
408	49.3635	11.8111	16.3215
409	56.8144	13.7569	15.8997
410	48.4385	20.7251	15.3995
411	34.9234	22.421	17.115
412	67.9814	10.8411	18.0381
413	98.2881	9.6083	15.8424
414	56.4579	21.0459	15.7093
415	73.9615	25.2237	16.696
416	60.6615	18.3093	16.6404
417	60.5229	11.8935	14.3867
418	78.8636	22.8476	16.0638
419	79.5959	16.0181	15.9092
420	53.8037	16.1618	14.8325
421	56.2872	14.8312	15.5547
422	71.4293	17.4062	15.2429
423	66.1347	13.9238	15.9958
424	57.7261	13.8065	15.3286
425	34.2248	20.4131	16.0474
426	44.9134	15.8333	16.759
427	60.2063	19.7355	16.5599
428	60.7191	13.9713	15.3884
429	62.2853	15.6205	15.0491
430	75.4576	15.6123	17.1714
431	86.4002	10.5398	16.0101
432	80.6399	6.50315	15.957
433	65.6237	11.9894	16.8188
434	64.1511	19.4499	14.0218
435	69.7144	20.4499	14.9679
436	80.6687	21.053	15.0261
437	39.8791	18.6205	14.652
438	65.789	21.8895	16.3164
439	42.6634	16.6528	15.9811
440	55.1515	19.0661	15.2469
441	56.2906	10.2322	17.1879
442	62.6184	22.5752	14.2903
443	83.4234	29.6973	16.6798
444	66.0973	12.4126	16.5551
445	48.9565	12.5129	15.5424
446	84.5817	9.45514	15.7014
447	88.3519	6.17939	15.0636
448	60.8502	11.8735	16.8297
449	75.7715	19.2561	16.1244
450	27.53	16.0167	16.0503
451	64.1227	13.9632	15.2857
452	70.9923	21.3094	15.8007
453	28.1182	12.3829	16.4651
454	73.0306	14.6692	15.546
455	88.1284	12.1972	15.6865
456	63.3992	9.50702	14.3001
457	53.4809	8.95046	13.1173
458	44.4293	16.1151	16.3505
459	53.0559	16.1544	16.0826
460	41.4024	18.0649	14.1964
461	64.4818	13.4449	17.1072
462	69.068	6.49458	14.5751
463	55.0862	23.6679	15.7145
464	61.0671	13.5972	15.3419
465	52.0647	24.2866	16.5672
466	54.1922	15.6611	14.2598
467	85.0241	16.2072	15.9364
468	48.393	17.9772	15.4662
469	57.2947	15.9812	15.0889
470	37.8043	21.2503	16.5021
471	61.4556	18.7858	16.4656
472	66.0667	19.3091	16.8722
473	66.3316	14.985	15.8494
474	64.4211	16.5849	16.7004
475	66.0664	12.5816	16.002
476	47.006	7.16189	13.9183
477	66.1016	13.8587	16.6572
478	99.3924	16.799	16.6584
479	51.5021	10.7002	14.4135
480	46.9807	17.2277	14.996
481	48.4337	15.0579	16.0119
482	61.3587	18.6775	14.5291
483	65.4132	13.064	17.6368
484	76.7691	21.9844	15.9093
485	37.7843	15.6201	15.5399
486	51.6778	7.309	14.7885
487	63.6777	23.2037	15.0511
488	72.4297	19.7311	15.9638
489	64.0222	7.16839	15.7876
490	61.1356	13.8506	17.3473
491	35.0624	17.0696	15.6951
492	76.7143	18.1795	15.3816
493	77.8054	15.4028	16.3688
494	56.3214	13.84	15.2447
495	44.5972	17.7663	14.8072
496	59.6878	12.4386	17.5957
497	71.7727	23.2581	16.0522
498	76.14	21.1239	16.6871
499	41.6706	18.3287	16.9762
500	70.9372	19.2419	15.1708
501	61.4635	14.8844	15.8951
502	69.7824	9.30629	15.8345
503	56.2985	13.4341	16.2939
504	58.8089	11.2834	14.9637
505	44.4933	20.431	16.9891
506	45.0349	12.412	14.8742
507	29.5573	18.1016	15.6324
508	70.7419	13.5584	15.8121
509	56.5987	17.1281	15.5602
510	69.2588	17.3126	15.6767
511	50.7571	15.2791	16.5271
512	68.2649	14.5675	15.6356
513	56.1852	13.5693	15.8459
514	51.3549	16.0428	15.8529
515	58.0634	14.6638	15.725
516	48.4575	13.4983	16.1848
517	47.8082	16.1547	15.8288
518	40.4876	14.5539	16.0098
519	77.6798	22.9327	15.4758
520	93.4261	17.8246	15.8487
521	71.4366	18.4022	15.7392
522	61.207	11.6624	14.3799
523	75.103	20.3359	17.4283
524	59.829	12.8527	15.3009
525	73.7647	16.6158	16.1383
526	51.295	14.6813	15.7963
527	84.8039	24.7431	16.744
528	69.9892	16.3511	14.9788
529	62.6574	18.2677	16.3708
530	46.2106	18.7003	14.7261
531	35.3117	15.0911	15.9427
532	47.1892	14.6797	15.4315
533	66.6449	15.2324	15.1519
534	68.3451	19.2167	15.3332
535	59.8963	11.4091	15.2715
536	56.0984	21.5315	15.6757
537	28.4937	18.7965	16.6816
538	40.0412	14.6214	15.4119
539	62.7739	17.3903	15.2167
540	87.0587	19.118	15.7047
541	74.697	18.5356	16.4247
542	63.6112	12.0789	14.5245
543	58.058	11.0415	16.9017
544	73.5143	29.6431	15.5579
545	79.3979	19.7428	16.664
546	74.0008	19.6464	15.7683
547	79.2648	13.7271	16.0718
548	88.9317	22.3915	16.0232
549	78.5968	16.2346	15.4239
550	55.8163	12.1198	15.6448
551	52.0259	9.40514	13.8293
552	63.8754	13.998	15.2136
553	33.9907	17.1604	16.5059
554	50.5295	21.9666	17.4711
555	44.2221	12.0139	15.3308
556	74.2332	18.5829	16.2584
557	54.4621	8.14052	15.6352
558	75.426	12.3162	16.9608
559	56.2285	9.62694	16.1077
560	52.3252	22.3876	16.2719
561	55.258	17.2036	15.7801
562	77.3375	10.5166	14.4294
563	59.2242	15.7065	15.3779
564	62.4397	16.5502	15.748
565	79.6572	19.1609	16.4738
566	49.9235	13.8296	16.3902
567	83.3443	21.2659	16.8033
568	58.4814	20.0916	15.7769
569	57.7902	15.6872	16.7677
570	76.9625	22.7842	15.1409
571	63.1962	10.9249	15.2902
572	81.435	23.5217	15.7112
573	51.6928	14.2652	16.0572
574	57.3656	19.4126	15.9621
575	52.877	21.9446	15.9774
576	72.1771	15.9344	13.5873
577	55.0175	14.339	16.1844
578	70.7798	10.1165	16.0823
579	76.6741	10.0186	15.5274
580	77.3646	19.1613	16.1303
581	60.7471	13.8633	15.6218
582	73.1164	17.5262	15.5931
583	41.2571	15.7657	16.2131
584	77.7755	13.5157	14.7875
585	70.2267	19.8354	15.566
586	58.7708	16.5975	15.7848
587	91.7164	12.8405	15.2794
588	62.0303	10.362	16.7649
589	56.5933	11.638	16.2922
590	66.8067	20.4296	16.7471
591	71.8177	15.8854	15.8122
592	60.7927	19.1869	17.1449
593	74.3044	22.1408	15.9452
594	78.7548	20.3348	16.2152
595	72.605	5.97196	15.0068
596	79.045	14.6022	16.127
597	76.1007	14.6869	14.5004
598	43.3487	14.4907	15.9353
599	55.7879	13.7652	15.5819
600	53.8312	13.5326	16.2002
601	43.3858	21.3897	13.8956
602	73.7334	16.7255	15.683
603	46.3295	14.7493	15.4998
604	64.3575	22.8293	15.8422
605	58.87	15.3709	15.8865
606	51.7005	19.4815	15.5736
607	57.8346	12.5027	17.5182
608	78.0436	24.6006	16.1316
609	63.8781	18.8769	16.1916
610	95.8493	17.4834	16.1509
611	77.7977	12.0975	16.536
612	77.4232	16.2229	15.7418
613	59.0819	14.0085	16.6317
614	49.2495	12.2757	16.1172
615	62.2531	17.669	15.5626
616	62.7072	19.1901	15.1452
617	67.6088	15.2005	16.0949
618	43.1453	16.4932	15.6703
619	30.0534	16.2719	15.9952
620	98.3274	20.1402	16.0219
621	58.2486	20.1033	14.9852
622	61.6636	16.0112	13.6949
623	60.2633	9.24495	14.8678
624	78.6124	17.0666	16.4682
625	78.7402	11.2876	14.6302
626	67.8399	7.54081	15.7596
627	39.5712	12.3109	15.6647
628	58.1344	12.2712	16.2813
629	65.9719	9.06284	15.9331
630	56.6061	8.23024	15.8448
631	58.7364	15.4472	15.8655
632	52.0417	20.5374	16.9899
633	55.4532	12.9306	15.4888
634	68.7276	10.7507	15.0319
635	60.5991	10.6261	16.9836
636	63.3188	9.8887	16.6551
637	56.4397	17.0505	16.455
638	59.4531	21.398	15.5084
639	55.7916	22.7762	16.7788
640	54.4045	15.8585	17.7934
641	61.8188	13.1621	15.5676
642	74.9022	16.6484	16.754
643	60.2181	23.2387	16.1232
644	62.7511	14.5334	16.1891
645	52.8383	13.3714	16.7326
646	47.2311	10.1361	16.6364
647	70.1744	17.2661	15.1965
648	72.8246	20.4128	16.4016
649	59.6555	12.5375	16.0311
650	50.3532	10.9054	16.6852
651	32.9013	12.6021	15.3677
652	64.7427	7.74351	16.9541
653	61.429	12.3616	14.3113
654	60.5128	16.5908	17.1254
655	53.9047	14.7189	15.6416
656	35.9146	19.3856	16.7915
657	69.6208	11.5144	15.6852
658	58.7029	11.4588	15.9013
659	54.7942	14.2639	15.7169
660	55.334	8.87459	15.2608
661	50.5833	10.4069	14.8656
662	61.3675	15.8409	14.885
663	50.3612	7.54365	14.5369
664	60.7341	15.0303	15.9327
665	67.6518	16.9649	15.6489
666	40.8254	7.75095	15.4767
667	39.2049	23.823	16.3659
668	69.294	17.6124	15.1922
669	61.8453	13.4163	15.1128
670	84.7112	23.2806	15.4315
671	73.382	19.8275	15.3195
672	74.9593	14.4047	16.059
673	49.3053	6.00218	15.3048
674	88.4217	22.2136	17.0935
675	71.5044	18.4747	16.5658
676	73.839	22.4296	15.5002
677	82.2892	14.4578	16.3443
678	46.2151	17.5672	15.0408
679	70.4416	23.2628	15.7931
680	72.9618	8.86984	15.6306
681	28.8479	19.9886	16.4563
682	74.0996	14.4132	14.9099
683	38.5795	19.1084	16.8857
684	54.5736	11.8901	14.4852
685	63.5553	14.485	15.4016
686	60.431	16.6768	15.6171
687	60.4845	18.5067	15.4813
688	43.4094	18.0688	16.1741
689	41.2033	12.4081	17.8523
690	51.4755	23.6964	16.3565
691	68.4588	19.2746	16.0098
692	60.5252	20.9744	15.754
693	33.2663	8.849	15.5803
694	68.7515	17.0312	16.128
695	35.1241	16.8243	16.8268
696	84.8288	8.82115	15.0499
697	81.2193	15.1129	15.2145
698	80.9642	16.2728	16.9389
699	66.8575	12.5087	15.9895
700	83.2083	23.3528	16.2778
701	50.2654	20.8583	14.9248
702	56.6183	6.02514	15.5211
703	80.5681	26.3638	16.235
704	49.5664	16.4563	16.304
705	55.1763	21.2232	16.5602
706	69.9978	15.1076	16.1421
707	72.5277	16.7516	16.819
708	49.323	14.8801	15.5425
709	68.2897	13.0067	15.7514
710	48.1313	16.8656	16.7223
711	71.865	13.6063	15.6237
712	64.0102	23.147	14.0934
713	70.126	17.5026	16.0226
714	70.8638	7.161	15.9275
715	71.9977	11.0963	14.9505
716	56.6231	9.37612	15.9333
717	41.1604	13.2144	16.6188
718	43.3794	21.6912	15.3729
719	50.7	12.8225	15.9125
720	69.8177	13.3168	15.2082
721	84.9676	12.8951	15.7636
722	61.1582	9.37771	16.231
723	76.7249	19.0993	15.1894
724	85.6621	18.5473	15.4773
725	42.2806	19.6465	15.0974
726	45.9499	14.2396	15.9891
727	67.2044	18.2862	16.8678
728	76.3854	16.6182	16.9705
729	59.3561	21.1145	15.8097
730	55.8351	10.3499	14.8514
731	63.0821	13.213	14.5902
732	62.6022	19.6771	16.7685
733	58.9611	9.7054	14.3634
734	78.9422	23.2153	15.9477
735	44.3345	13.9086	14.0264
736	34.5001	22.4455	16.3222
737	73.5081	12.9719	17.0736
738	78.581	10.1046	15.4668
739	39.8665	9.41816	15.9894
740	74.8705	13.2809	15.9325
741	53.7621	14.9469	16.3248
742	60.4123	8.71823	16.1753
743	41.0737	15.5597	16.3541
744	75.2082	14.639	15.9983
745	80.2001	16.8896	15.9981
746	69.2605	7.26607	16.3877
747	63.7191	17.4419	15.8055
748	73.2703	20.3953	13.4282
749	37.2686	12.1791	16.5837
750	53.0089	17.6319	14.733
751	69.9466	18.768	15.6003
752	50.4192	16.8666	16.495
753	50.2518	18.513	16.7006
754	49.6375	15.5909	15.8136
755	65.0595	16.0787	15.6205
756	80.3074	16.4342	15.3014
757	73.8391	15.7805	15.3579
758	70.4063	21.4024	14.933
759	55.324	16.9619	16.2277
760	50.011	17.7277	16.135
761	30.259	12.3652	16.6266
762	34.6067	13.1149	14.9764
763	60.5608	15.9229	16.6552
764	73.7406	18.5303	15.4727
765	51.2032	16.3425	15.7293
766	56.8203	18.6045	14.5789
767	65.9602	11.1228	16.1319
768	41.1584	14.8474	16.6521
769	58.4267	13.865	17.6392
770	66.9355	22.2158	15.9669
771	69.9227	20.3153	15.8587
772	63.3866	19.6612	15.5785
773	75.7651	14.3801	14.9696
774	51.1114	18.9584	15.9267
775	28.6314	15.943	15.8231
776	71.057	14.4122	17.5656
777	66.226	22.118	14.8482
778	55.8238	13.7587	15.5732
779	55.193	11.441	15.3873
780	82.0816	8.40349	15.376
781	78.4243	22.3874	16.3278
782	47.7857	13.4961	16.2827
783	41.7733	9.97777	16.0845
784	46.2195	21.8158	15.4362
785	72.1653	8.66741	16.0734
786	60.8638	15.2669	13.682
787	72.4033	14.3277	17.4545
788	44.5003	15.0326	14.572
789	37.7212	24.0566	17.3096
790	82.3747	15.2537	15.0208
791	73.1875	22.4994	15.5658
792	80.633	17.58	17.6106
793	46.1208	16.1337	15.4927
794	59.1556	21.6801	15.3701
795	77.5184	10.9712	14.9885
796	90.2731	22.2851	15.8182
797	70.7796	18.932	16.7784
798	71.2535	18.924	15.621
799	45.0171	21.3678	15.8501
800	77.7616	9.00676	15.6596
801	67.3393	18.0169	16.2456
802	50.1343	10.8741	14.8936
803	37.9743	16.7139	16.5254
804	55.4237	19.2333	15.0743
805	58.964	19.8903	15.8246
806	46.1319	12.909	16.3249
807	83.209	18.2107	15.6631
808	63.2701	11.5661	16.5091
809	66.6149	16.3633	15.0854
810	48.5616	18.1311	15.8908
811	37.6764	14.5423	15.7963
812	67.6039	18.1707	15.8841
813	58.8461	9.62127	15.6466
814	75.7875	20.09	15.2672
815	60.1391	14.9251	15.688
816	58.8946	11.8289	15.1006
817	81.2611	14.2123	15.798
818	62.0102	16.9109	16.8514
819	37.1336	14.0544	15.3591
820	74.6242	13.0025	15.5222
821	83.6001	15.3674	15.6799
822	72.4056	16.0554	14.3954
823	72.3299	23.0818	15.6762
824	57.5012	23.5008	15.7449
825	86.2678	9.4067	15.4733
826	66.8045	21.5031	16.1824
827	58.8728	19.9047	16.0902
828	90.9478	15.2677	15.1936
829	63.423	13.6541	17.1192
830	48.1567	12.5049	14.8551
831	60.7425	14.952	15.3843
832	52.1601	14.7275	15.2714
833	63.3903	20.0267	16.3141
834	80.3379	10.544	16.0587
835	48.6594	12.0164	16.4151
836	32.689	10.4446	14.2658
837	41.2274	24.3577	16.1002
838	114.519	9.58407	15.8945
839	78.8665	23.4971	15.6607
840	56.1343	12.0794	15.0673
841	52.5995	15.2175	16.2385
842	81.2476	21.0954	15.8683
843	64.0525	16.1389	15.1686
844	41.1881	15.7253	16.0219
845	76.8039	10.9346	16.0689
846	90.116	24.0983	14.949
847	81.7457	20.3906	15.2554
848	85.3176	9.85117	15.7833
849	109.18	7.58274	15.9405
850	43.1087	12.4157	16.0458
851	51.8276	21.5887	14.8044
852	92.0066	18.7496	17.0317
853	90.6339	16.7163	15.3829
854	63.0952	7.10406	16.8649
855	31.4868	13.4175	16.1485
856	66.3558	15.2937	15.7726
857	47.6668	13.3089	15.8762
858	58.0248	13.3742	14.7157
859	53.3488	23.3972	17.4
860	64.7919	14.3369	14.1712
861	51.7927	15.2481	16.0123
862	52.1532	11.8971	16.1218
863	65.7331	20.6917	16.1606
864	42.8487	20.667	14.0195
865	74.6347	12.2263	15.2636
866	56.0931	18.2134	15.975
867	50.1294	14.9537	15.0999
868	68.5811	20.1964	14.4895
869	65.3599	21.3386	16.232
870	52.3276	17.8906	15.2421
871	54.2703	20.3304	16.2408
872	63.5513	15.1612	14.9258
873	55.156	15.2318	15.165
874	89.912	9.4116	16.1671
875	75.9722	17.8726	15.0058
876	41.6905	22.0411	14.7337
877	47.9235	15.0216	15.6081
878	71.8027	14.8648	15.3717
879	77.0976	22.5922	15.3423
880	91.0745	16.5278	15.4177
881	74.4838	21.1042	15.4814
882	86.2375	16.5325	15.6915
883	55.5605	9.61769	15.2412
884	61.9678	13.5582	15.8752
885	58.6812	17.5063	15.9123
886	56.0745	17.5421	16.0981
887	38.5732	17.1264	15.4806
888	78.6565	11.4525	15.0235
889	71.0227	8.13277	15.6588
890	57.8629	13.9835	16.5195
891	57.973	17.2037	17.0521
892	69.0379	11.0009	15.9834
893	42.6571	15.7473	16.2971
894	35.3209	14.0146	16.5966
895	101.74	18.8407	16.7517
896	69.9107	14.064	16.7326
897	37.6719	18.4856	16.1024
898	55.3857	10.0964	15.501
899	42.6563	14.0991	16.2407
900	41.157	14.3627	16.4684
901	42.8445	22.6552	16.138
902	46.259	19.2811	16.1419
903	76.7032	25.4665	15.8882
904	58.024	20.9928	16.4593
905	61.8311	14.6032	14.7895
906	30.0047	16.0267	15.5194
907	73.6251	22.4437	14.4189
908	61.6947	14.5633	15.994
909	76.3576	13.5476	16.1161
910	50.2475	23.5444	15.8347
911	73.1576	13.0419	16.318
912	82.4537	16.7767	16.2807
913	104.566	18.8584	15.3043
914	61.2094	20.2325	16.2434
915	51.7064	7.2166	15.5431
916	52.5553	15.2941	16.05
917	64.3343	6.11	15.1152
918	54.4371	10.9927	17.7854
919	55.6849	15.429	16.0384
920	58.8183	8.23045	16.0187
921	47.4227	11.0665	15.7299
922	48.1916	12.7447	15.3227
923	71.3955	23.8293	15.2906
924	39.2528	12.342	15.6981
925	52.7778	19.6074	15.5755
926	65.2094	14.8409	15.9577
927	39.7325	18.2375	15.1581
928	54.4794	21.4749	16.8378
929	42.2634	11.6503	15.7294
930	57.7636	16.1531	15.2666
931	76.8094	9.55607	14.864
932	47.1088	12.5309	16.7065
933	85.5315	14.9786	15.7787
934	72.1445	9.89973	16.2071
935	74.0597	23.4366	14.729
936	53.7491	14.9857	15.4166
937	60.9418	10.8181	16.6928
938	69.452	15.0413	16.6145
939	57.7648	14.0541	16.0732
940	43.6366	15.0169	16.1901
941	79.8964	10.4262	15.6182
942	65.129	12.5887	16.1325
943	44.9562	15.5968	16.733
944	38.3207	10.5881	16.6454
945	53.3064	15.743	16.4401
946	58.6587	12.5561	16.4767
947	75.5993	11.464	15.1282
948	67.7543	19.5838	16.0481
949	42.4649	15.9977	15.3202
950	81.1757	14.07	15.8301
951	70.4671	18.653	14.6878
952	80.0992	14.0352	15.8434
953	37.2704	14.5283	15.3623
954	68.7019	11.9726	14.4744
955	61.8452	17.4657	14.9289
956	43.9709	7.55189	16.2801
957	58.1173	10.5926	16.076
958	56.9442	13.6208	16.3531
959	57.0761	14.8028	15.1973
960	67.9479	15.0024	14.8548
961	43.4031	12.3101	16.0591
962	52.9348	18.0366	14.8107
963	73.679	21.0776	16.7212
964	47.3164	18.8491	14.8477
965	38.1818	13.971	15.0611
966	68.778	13.9576	16.0272
967	65.6582	10.4008	16.1897
968	26.4235	15.762	13.7529
969	63.0609	8.05276	15.9852
970	70.8233	9.44041	16.0093
971	78.4703	15.6692	17.1668
972	64.4337	11.75	15.9687
973	78.8324	7.79267	15.9941
974	60.7902	11.1594	16.8909
975	78.6833	10.9434	16.4878
976	60.6761	25.0955	15.7274
977	54.3858	6.62144	14.6253
978	60.8527	15.9015	15.8513
979	84.4631	13.9267	16.3778
980	68.912	25.5907	15.733
981	31.7116	16.7071	15.08
982	62.401	11.5795	16.9291
983	39.2866	11.0182	15.0368
984	84.5446	20.4234	16.5692
985	64.2145	15.7954	15.8868
986	76.712	22.3549	16.0301
987	48.1442	12.0502	15.6815
988	62.4288	16.0296	17.1261
989	56.5238	11.6069	16.6883
990	55.6984	11.7264	16.512
991	48.6193	22.2878	16.545
992	56.8151	13.7388	14.834
993	41.847	14.4025	16.5475
994	63.1917	13.1262	15.6333
995	69.2227	18.8631	15.6706
996	45.7376	12.1931	15.9131
997	51.417	12.8231	16.7872
998	97.9368	19.2488	15.4186
999	65.745	21.2908	14.6412
1000	74.5333	13.9138	17.2521
1001	46.2974	16.1761	16.5593
1002	67.2524	11.5933	16.1586
1003	60.2297	8.04889	14.598
1004	45.3314	21.0545	15.0798
1005	42.5025	7.79032	14.9419
1006	48.5171	20.9736	14.6862
1007	63.5505	17.0388	16.1324
1008	48.5847	17.1303	16.521
1009	55.8091	19.6262	16.3389
1010	50.6942	23.1629	15.7744
1011	30.4524	29.3655	14.8799
1012	51.3625	26.4987	17.1487
1013	94.7351	16.7479	15.582
1014	48.5314	14.5063	16.6189
1015	53.5827	14.7746	16.0656
1016	41.9036	10.2721	15.5503
1017	52.2732	7.61083	15.9814
1018	72.4406	9.86802	16.12
1019	34.6226	18.3374	14.3745
1020	67.5665	20.6889	16.6106
1021	52.9963	10.94	15.8474
1022	83.0552	16.5207	15.1164
1023	55.0303	21.114	14.7281
1024	70.5473	20.8917	17.1699
1025	49.6933	11.8678	15.9164
1026	90.1284	17.8541	16.4683
1027	54.6661	6.36224	14.7839
1028	46.3969	18.1952	15.7664
1029	63.3327	18.8365	15.162
1030	76.9539	13.9036	16.236
1031	70.1598	15.9384	15.9693
1032	61.6504	12.0935	15.2546
1033	45.2439	23.8974	15.1495
1034	72.9227	16.171	16.7488
1035	62.9088	15.7666	16.6922
1036	61.878	10.2261	15.9039
1037	93.0245	10.0091	16.5856
1038	48.9979	15.8841	15.9646
1039	61.4401	15.1621	15.3597
1040	58.7151	20.8869	15.7095
1041	62.336	14.6889	16.2098
1042	42.5183	13.2026	16.0053
1043	44.1778	11.0196	14.403
1044	49.53	19.5955	15.6419
1045	39.4807	9.77067	15.4132
1046	45.776	14.3949	15.5232
1047	62.4615	20.6301	14.9538
1048	42.8988	15.0108	15.3841
1049	75.8021	17.1777	15.599
1050	65.2903	19.7619	16.3114
1051	38.0044	18.4829	16.307
1052	56.8424	10.8186	15.7439
1053	48.715	13.5995	15.2286
1054	35.0195	13.1098	15.9328
1055	69.5463	15.5545	15.6173
1056	57.7656	22.6721	15.3411
1057	41.4508	11.37	16.5037
1058	72.039	21.4031	15.0203
1059	54.8715	9.76566	17.6808
1060	67.052	17.3418	17.0362
1061	65.1937	17.9594	14.8834
1062	34.4469	11.0442	15.9779
1063	46.6428	27.6148	16.6345
1064	49.0492	11.5088	15.0499
1065	54.1961	12.3946	16.8803
1066	80.2317	15.2644	17.2213
1067	79.1292	15.1772	15.7798
1068	38.9684	16.2015	15.7286
1069	72.8297	19.9213	15.9497
1070	43.5159	19.3042	15.6415
1071	50.2374	10.5003	16.1159
1072	72.6042	18.1222	15.3062
1073	51.6571	11.9777	15.3767
1074	42.5068	11.6795	16.5641
1075	69.7896	12.0814	16.636
1076	56.5054	17.6076	15.8674
1077	73.0602	17.2697	14.9584
1078	80.195	18.7086	15.94
1079	45.3693	18.4927	15.4201
1080	87.4156	12.9324	16.1312
1081	46.9309	16.363	15.7641
1082	54.07	18.9625	14.3536
1083	77.0155	10.2669	16.417
1084	50.675	17.4021	15.3345
1085	93.3586	12.3854	15.1309
1086	69.3145	21.7304	16.3537
1087	28.0106	13.2133	16.3583
1088	63.2187	21.5641	16.8216
1089	60.829	21.3626	15.4218
1090	80.2349	16.1661	17.6802
1091	60.3227	24.6496	15.4336
1092	42.3648	12.593	14.5631
1093	44.1765	16.6056	15.6703
1094	55.9624	10.6193	16.6846
1095	45.4215	15.3825	16.3455
1096	67.5207	13.1159	16.6507
1097	70.2308	18.2574	15.555
1098	51.5653	25.3283	15.6968
1099	33.1471	9.53349	17.2562
1100	60.8399	20.9046	15.8961
1101	49.665	13.348	16.3013
1102	57.8574	15.2051	17.7832
1103	83.176	13.7349	15.78
1104	41.687	16.263	15.9803
1105	65.3118	15.8598	17.5851
1106	65.9771	16.4643	15.5885
1107	63.0095	8.62095	14.9499
1108	57.2928	16.985	15.5273
1109	47.3973	18.9001	16.7026
1110	86.7751	15.8854	15.9051
1111	72.793	8.25276	17.9263
1112	83.3464	14.115	14.7051
1113	71.3845	17.7883	15.5634
1114	64.3227	11.3163	16.0671
1115	44.1838	17.7527	15.7851
1116	52.3414	18.0739	15.4837
1117	33.5655	14.396	17.8735
1118	90.4889	18.0012	16.4152
1119	46.4895	18.5805	15.8963
1120	43.2923	20.9051	15.7851
1121	54.6093	24.3402	16.0107
1122	38.9097	15.8036	15.7765
1123	60.367	16.4918	16.063
1124	78.502	16.3412	16.2007
1125	65.9714	11.2359	16.3107
1126	45.2669	15.0712	16.6703
1127	54.8727	14.7073	15.7613
1128	88.7499	11.083	17.1318
1129	50.8946	14.6975	14.839
1130	59.3895	11.2127	16.2665
1131	65.8853	6.65018	15.3229
1132	62.1771	13.5287	15.9339
1133	38.9709	8.71626	16.0444
1134	56.249	19.9052	15.1552
1135	66.2097	15.5962	14.7436
1136	102.257	18.9989	15.7547
1137	56.6691	20.028	17.3607
1138	81.9886	6.15576	15.1857
1139	64.1904	14.8898	16.082
1140	33.3967	13.4873	15.6657
1141	59.6071	16.5262	16.1056
1142	36.9024	22.6014	16.6417
1143	35.5897	12.8002	13.7974
1144	85.5477	11.8057	16.8435
1145	47.4758	12.8397	15.9764
1146	99.637	19.2918	15.3157
1147	78.0884	20.7701	14.7495
1148	81.8794	16.6552	16.1335
1149	37.3721	12.1219	16.4536
1150	76.5013	15.3919	15.4828
1151	86.8975	14.6915	16.2513
1152	88.1902	14.5431	13.5952
1153	50.1482	16.4305	16.5494
1154	48.2852	15.9362	15.2424
1155	79.4209	15.8022	15.9241
1156	76.7568	14.1131	14.598
1157	37.3366	6.4541	15.8517
1158	81.2528	12.3094	16.2765
1159	48.9546	15.9497	16.8115
1160	49.658	13.0799	15.9252
1161	68.7049	19.9203	17.3212
1162	59.6996	10.0668	17.2204
1163	61.7648	11.9766	17.3198
1164	55.3083	16.8645	15.4718
1165	88.7406	6.25753	14.969
1166	67.1432	16.2018	15.8723
1167	41.528	16.361	15.2685
1168	62.5979	11.8622	16.8341
1169	69.1429	21.5255	17.0397
1170	60.8768	18.6342	15.7063
1171	67.2385	22.5753	17.5071
1172	51.8767	14.9824	15.7717
1173	26.9933	19.054	15.8524
1174	41.3438	20.5873	16.792
1175	60.051	14.2864	15.9871
1176	63.2682	15.2204	16.2602
1177	37.254	22.1864	16.5886
1178	59.4009	15.1619	17.0191
1179	62.8762	13.2161	15.2768
1180	44.19	18.456	15.7758
1181	84.1394	20.5339	15.6568
1182	59.6666	11.3234	15.5909
1183	56.4472	12.4089	16.2568
1184	62.6625	20.0386	15.0034
1185	69.9891	19.2808	15.7979
1186	57.1736	16.9994	17.2113
1187	59.3912	8.69768	16.7519
1188	73.3886	15.8725	16.1545
1189	41.5945	14.01	14.5424
1190	61.114	16.4966	14.997
1191	67.3362	12.843	16.2596
1192	72.5222	6.61154	15.939
1193	30.2418	17.4299	16.6459
1194	73.5539	14.5643	15.7303
1195	39.5082	17.0925	15.4688
1196	70.9793	16.4236	15.422
1197	57.7801	14.3599	16.1351
1198	44.9793	18.4893	16.2736
1199	49.2472	15.2379	17.4564
1200	47.4483	21.9055	16.018
1201	58.7518	18.2891	16.8048
1202	54.5138	12.6699	14.9402
1203	62.0108	13.6844	16.709
1204	77.0714	23.2579	15.797
1205	63.7264	19.594	14.6082
1206	56.4592	13.9711	16.6758
1207	79.8121	12.5529	14.001
1208	61.204	14.5292	15.7555
1209	54.9092	15.2619	16.4671
1210	87.5792	16.6554	17.0499
1211	94.1659	19.4254	17.3801
1212	47.2457	11.2192	15.924
1213	44.1277	20.5764	16.7357
1214	66.6853	14.3468	16.2217
1215	40.6081	10.6214	15.8746
1216	73.6258	19.3916	15.5772
1217	54.0944	10.3207	15.6591
1218	89.3863	16.9571	15.2217
1219	72.1999	14.5108	16.6961
1220	85.5561	13.8019	15.7144
1221	70.4517	25.5236	16.0181
1222	76.51	15.0121	14.9986
1223	58.1176	18.0269	16.2886
1224	87.1244	14.6696	16.1174
1225	62.8886	20.3744	16.1775
1226	51.7049	17.9266	15.3389
1227	51.2626	13.6083	14.6927
1228	85.3782	9.76199	15.6953
1229	60.6226	22.0923	15.8275
1230	60.8427	19.9352	15.485
1231	58.4765	16.0291	14.9945
1232	59.0542	10.6658	15.22
1233	44.9609	16.097	15.7341
1234	88.7194	13.0839	15.186
1235	72.5016	15.4325	15.5566
1236	56.172	14.0752	15.1841
1237	85.6274	19.8051	16.1216
1238	95.7908	7.37137	15.2418
1239	68.8465	15.5867	16.205
1240	55.6226	13.0995	17.0512
1241	60.0612	13.811	15.8364
1242	53.4367	18.8022	15.8062
1243	62.6778	11.1496	15.6526
1244	57.5558	14.8336	15.7647
1245	92.1538	17.613	16.7468
1246	73.7098	11.5673	15.9497
1247	89.371	18.5626	17.0603
1248	65.8117	23.2034	15.507
1249	76.846	14.618	15.6936
1250	68.2627	20.5337	15.354
1251	58.5717	12.224	15.6487
1252	54.399	14.2893	16.7252
1253	52.1905	13.4056	15.9596
1254	59.7701	16.0487	16.2841
1255	52.1536	17.7604	16.3361
1256	86.2376	15.0553	16.9329
1257	44.6179	14.8895	16.476
1258	67.4453	7.09255	16.8244
1259	82.9553	18.5471	16.0215
1260	50.6594	7.3663	16.7523
1261	78.3424	16.8698	16.3348
1262	82.4677	18.2747	15.7378
1263	51.391	15.4311	15.8542
1264	77.7274	10.2471	16.9547
1265	63.4009	18.0621	15.9754
1266	78.6437	13.7097	16.7289
1267	73.8867	11.9854	15.5999
1268	76.1583	11.7419	15.7204
1269	67.4177	15.2714	16.7039
1270	76.6193	14.9663	15.3824
1271	51.8517	15.2558	17.7037
1272	58.6198	15.1989	17.1891
1273	72.066	18.6255	14.8971
1274	70.6755	18.7391	14.9481
1275	43.1363	14.9339	15.4099
1276	75.3668	16.4892	16.4215
1277	67.7296	19.2564	15.6938
1278	49.8086	16.3682	15.2951
1279	83.1965	16.5306	15.4015
1280	53.8092	11.8731	13.8173
1281	52.5289	15.7684	17.3088
1282	32.4989	14.8992	16.0838
1283	59.7873	15.064	16.3072
1284	61.1835	20.1145	15.722
1285	82.08	25.4652	16.0044
1286	115.022	9.81871	16.4248
1287	51.8529	20.4531	16.2271
1288	78.7549	19.5647	15.1902
1289	54.8121	10.4895	15.5264
1290	82.7034	17.2327	15.071
1291	92.1393	11.2327	15.768
1292	47.4229	16.8223	13.8374
1293	93.3295	18.7112	16.4665
1294	51.8009	21.4451	16.7013
1295	32.5698	24.5156	16.283
1296	42.5401	14.7339	15.8844
1297	54.7134	18.4555	15.3194
1298	62.4312	11.3524	16.366
1299	29.6689	21.5545	13.9315
1300	70.5717	23.3196	16.5053
1301	63.7137	16.1345	15.2034
1302	48.9632	10.4224	15.8592
1303	70.7957	18.7797	15.6528
1304	62.3849	14.7476	15.6494
1305	64.3589	24.3514	15.3558
1306	74.9654	23.1345	15.2774
1307	72.0826	20.4815	15.4862
1308	79.3819	21.8392	15.2851
1309	86.089	9.48815	14.9237
1310	53.6943	19.3345	15.0655
1311	54.481	17.5192	16.5847
1312	47.4827	20.9371	14.9432
1313	67.3899	15.7661	16.6932
1314	70.0418	14.894	16.0979
1315	58.147	17.0425	14.6171
1316	99.1241	23.928	15.4987
1317	57.4788	20.8011	16.017
1318	92.0249	12.087	15.5376
1319	80.5848	13.1181	16.3562
1320	63.546	8.19822	15.6295
1321	62.7358	7.24676	16.87
1322	46.8456	19.1842	14.8565
1323	69.0036	13.0959	15.7681
1324	62.7894	12.7664	16.9826
1325	67.0483	20.0958	16.9928
1326	63.8943	8.90097	16.3741
1327	81.3529	21.1807	16.4444
1328	84.5736	18.6409	15.6895
1329	50.2088	17.5505	15.2002
1330	55.0717	19.7048	16.9131
1331	84.4845	21.8467	14.8829
1332	62.5895	22.5596	15.8109
1333	84.9399	20.1145	16.7862
1334	53.6039	14.7207	15.5056
1335	77.2606	17.1653	15.4483
1336	68.0871	11.8693	15.7666
1337	55.6097	10.0258	17.2474
1338	43.3177	16.4388	16.6084
1339	39.161	10.1476	16.5933
1340	74.4183	13.0172	16.0544
1341	61.0385	18.2858	16.834
1342	75.4125	22.6691	15.6893
1343	44.2317	14.4858	15.4751
1344	44.8181	16.8691	14.6167
1345	65.9693	17.7779	16.5864
1346	53.8046	11.487	17.1619
1347	54.923	22.4392	14.679
1348	64.9498	22.5269	17.2393
1349	84.6752	13.6654	16.9288
1350	67.4285	11.595	16.5016
1351	47.4172	12.9744	15.8819
1352	47.1066	24.1797	15.3533
1353	43.2359	24.6349	16.5126
1354	62.7333	9.7322	16.4145
1355	70.6991	11.5101	15.2464
1356	66.8472	19.6257	14.0065
1357	71.2852	13.0942	15.5517
1358	50.6733	18.4152	15.2628
1359	42.4804	15.4298	15.8053
1360	41.9781	13.0732	15.8791
1361	47.4144	18.8887	17.641
1362	75.5191	13.0107	16.3646
1363	68.4754	10.9604	15.49
1364	74.7877	14.8496	15.5508
1365	68.2797	12.5274	16.1507
1366	51.101	14.3017	16.2388
1367	77.7339	14.4962	14.5054
1368	83.3908	21.898	15.169
1369	33.0607	11.4611	15.7457
1370	83.265	12.3416	16.1156
1371	52.682	21.7936	15.9885
1372	88.2295	18.2927	16.3714
1373	40.3005	14.6813	15.2749
1374	77.1745	14.52	14.4953
1375	38.4926	13.3383	16.9
1376	95.6997	9.22744	14.6462
1377	73.7986	14.017	15.2977
1378	31.0518	21.075	15.026
1379	91.7549	22.0525	14.7947
1380	50.9481	17.1717	16.6885
1381	69.6277	13.4054	17.6989
1382	64.4583	14.1718	17.3779
1383	45.946	18.5049	17.8303
1384	43.53	20.3869	15.7721
1385	99.177	9.25091	15.9574
1386	43.0514	20.4353	16.6975
1387	53.4672	17.5019	16.8896
1388	38.5645	18.1679	15.985
1389	53.0965	20.1943	16.4365
1390	68.3015	13.7752	16.7785
1391	62.1813	25.5835	16.7587
1392	40.5818	16.9925	16.2177
1393	46.8843	12.5158	15.1194
1394	58.7391	25.2836	16.5867
1395	80.7662	10.425	16.0343
1396	54.7762	16.4715	15.8359
1397	62.0806	19.4015	16.1824
1398	50.6035	13.2909	15.4024
1399	40.4498	17.0074	15.6256
1400	90.6933	16.803	16.0357
1401	56.3108	14.6926	16.8355
1402	87.4854	19.5361	16.8952
1403	59.7758	13.6531	15.9783
1404	45.4695	14.6725	15.9396
1405	39.7353	14.0406	16.0472
1406	33.9297	18.181	15.3922
1407	92.7087	24.563	17.2341
1408	69.271	13.8755	14.3856
1409	60.9464	13.0863	15.2127
1410	80.9982	8.5529	15.6864
1411	71.9912	19.5618	16.3676
1412	51.7665	15.8284	15.683
1413	61.3161	17.1009	16.6042
1414	70.8286	24.1657	15.1341
1415	72.4759	17.3014	15.6501
1416	68.2889	12.4294	15.6255
1417	83.9037	11.6734	15.9051
1418	51.8423	11.6686	15.7984
1419	69.4648	9.36261	14.4005
1420	64.3576	18.3944	14.1785
1421	58.1208	8.1388	15.8533
1422	61.0081	22.3822	16.833
1423	45.4686	27.0498	14.3984
1424	44.8221	25.1269	13.4391
1425	95.5424	16.8711	17.1144
1426	58.5863	20.3649	16.1682
1427	42.5346	12.2481	16.3261
1428	64.0222	24.9211	14.8456
1429	49.7893	27.0616	17.2949
1430	65.6497	14.5388	15.9587
1431	61.6295	17.3598	15.9041
1432	76.7065	9.67639	16.5813
1433	60.4155	17.368	16.1628
1434	56.4676	14.1969	15.7469
1435	46.9382	13.4228	14.9997
1436	85.386	19.1117	16.0418
1437	62.857	11.8407	15.9516
1438	74.9539	17.5438	16.5156
1439	43.8414	11.1191	15.2779
1440	58.9845	18.8056	15.2051
1441	64.0689	13.6116	15.8011
1442	53.7168	17.2379	16.7072
1443	85.5151	22.9054	17.1427
1444	70.3283	12.5711	16.084
1445	53.4651	18.9547	16.5986
1446	83.7676	15.9289	14.4037
1447	70.8054	15.5709	15.3649
1448	71.4941	12.2698	15.4214
1449	51.4	19.6334	16.3111
1450	90.7501	14.7761	16.23
1451	80.6234	9.47236	17.1459
1452	38.9893	22.0881	15.6658
1453	36.3528	24.7432	16.6034
1454	47.8143	11.0824	15.3235
1455	71.4882	18.8717	17.2835
1456	69.535	21.4855	16.5409
1457	59.6143	15.8171	16.3499
1458	68.5434	17.7726	14.7887
1459	57.7604	18.5365	16.7291
1460	68.8409	13.3336	15.182
1461	62.2747	7.38864	15.8643
1462	44.8294	11.9152	15.5165
1463	94.6916	26.4574	14.9951
1464	68.7712	20.1255	16.428
1465	93.6256	19.5246	16.1581
1466	38.0409	9.06318	16.0809
1467	45.9518	21.2802	16.1165
1468	51.705	14.5135	16.1754
1469	52.51	16.7941	16.1347
1470	70.4711	10.3393	15.5995
1471	94.1041	15.3037	15.1796
1472	46.1473	18.6516	15.817
1473	62.5378	13.477	16.8976
1474	61.453	6.69403	15.3327
1475	52.8873	10.8735	16.6158
1476	80.2249	14.3531	15.0005
1477	63.4723	8.15939	14.8155
1478	69.3873	11.6306	15.5666
1479	85.3093	12.6539	15.6748
1480	52.8911	15.9209	15.0525
1481	40.9549	17.4852	16.5983
1482	64.2772	15.384	15.9139
1483	66.3561	13.4573	14.9778
1484	52.9575	14.3664	16.5187
1485	64.3607	14.5566	16.7114
1486	55.4096	11.3662	17.5493
1487	52.2167	19.8417	16.5252
1488	56.317	15.3294	15.6501
1489	42.0397	17.9991	17.3095
1490	79.9233	23.1394	15.9879
1491	68.2388	11.9822	16.7151
1492	49.543	15.9984	14.8284
1493	43.5672	6.29102	16.0979
1494	80.4468	20.9324	16.2365
1495	53.0495	23.3582	15.5994
1496	57.1117	22.1591	14.4213
1497	70.5199	20.005	15.5949
1498	82.4439	20.458	15.6221
1499	45.2024	14.8747	15.9314
1500	73.8777	20.8105	16.3178
1501	72.9603	7.99045	15.6508
1502	62.6758	15.8072	15.6695
1503	75.9364	9.53156	15.9327
1504	66.4708	15.9072	16.8907
1505	60.2812	18.9924	15.547
1506	39.2913	14.5619	16.5263
1507	32.304	18.7201	15.4851
1508	75.6055	12.5001	16.2699
1509	51.0568	13.3211	15.7219
1510	57.1828	17.5537	16.1219
1511	50.1373	18.7982	15.4063
1512	44.7387	21.3113	15.5866
1513	49.5231	11.9373	14.3744
1514	56.8773	14.4115	15.522
1515	47.8853	18.4891	17.1756
1516	66.4718	15.9668	15.3854
1517	49.7898	15.092	15.246
1518	38.0839	15.8551	16.0991
1519	34.1191	19.1084	16.9374
1520	48.367	8.47103	15.8854
1521	72.8399	21.2843	16.2849
1522	78.8498	8.31481	15.1811
1523	66.7507	24.3154	15.3676
1524	51.1026	16.2471	16.5128
1525	50.1372	13.8659	16.3509
1526	71.4139	24.0784	15.8812
1527	57.2812	16.5492	14.5856
1528	69.573	19.5006	16.2797
1529	35.0215	18.8539	15.9351
1530	31.3994	18.9336	16.3959
1531	58.9115	19.7423	14.4961
1532	56.3026	15.5405	14.8494
1533	51.9129	17.6027	16.3239
1534	59.0761	12.6873	16.4256
1535	68.2713	10.6316	16.7543
1536	45.4654	22.1341	15.2407
1537	61.4084	9.67149	17.029
1538	36.09	14.652	14.837
1539	41.9322	13.492	15.761
1540	84.0472	11.4939	16.2529
1541	88.2078	19.0755	16.2076
1542	53.029	9.24604	16.059
1543	76.2353	12.9747	15.1145
1544	70.731	17.4407	15.629
1545	56.038	19.7167	15.4325
1546	36.6683	20.2783	17.2568
1547	59.1573	20.7332	16.2087
1548	40.0299	15.4041	16.3547
1549	60.4602	17.0951	15.2719
1550	83.3089	10.9563	15.499
1551	56.7485	21.7647	16.2326
1552	57.0167	13.3305	16.4967
1553	58.783	9.69298	15.8804
1554	68.736	17.5189	14.8337
1555	85.0777	15.8018	14.6444
1556	60.3175	12.7695	14.8645
1557	75.803	15.5367	15.4533
1558	77.8375	13.21	16.2876
1559	66.0681	11.0935	16.1065
1560	47.4286	16.9894	16.2812
1561	76.9771	18.4127	16.7064
1562	85.0737	15.9579	16.4617
1563	62.5039	17.784	15.2048
1564	52.7977	18.3533	14.4074
1565	69.2894	14.8291	16.1988
1566	63.2893	13.2777	15.2973
1567	69.1758	16.5044	15.2203
1568	93.3394	15.0234	15.8226
1569	50.4813	18.7609	15.5775
1570	53.8536	12.9263	15.0196
1571	49.014	21.3034	15.0714
1572	45.7749	14.5384	16.1081
1573	60.456	19.5775	16.4023
1574	42.3547	15.945	15.2634
1575	49.8123	20.047	14.96
1576	67.1427	17.181	16.5422
1577	32.836	15.5434	15.6495
1578	90.1372	17.9892	15.8254
1579	80.8194	14.3407	16.5463
1580	44.8955	22.6658	14.7043
1581	64.244	19.6576	15.7134
1582	67.626	24.6852	15.4682
1583	47.9854	18.8844	15.5702
1584	56.9721	15.7248	15.3081
1585	46.6584	14.3587	15.0826
1586	74.3821	13.6296	16.251
1587	55.3151	6.97834	15.0762
1588	87.9218	19.232	15.7611
1589	45.7496	13.2574	15.992
1590	77.9332	21.1652	16.673
1591	36.5004	12.7294	16.059
1592	63.1156	19.0676	18.0793
1593	39.2206	11.7355	16.1518
1594	49.1875	9.91894	15.2661
1595	71.5403	20.0428	16.8675
1596	52.6958	11.3858	15.9172
1597	39.0163	12.7767	17.7399
1598	49.8804	16.8808	16.5631
1599	51.6049	19.2553	13.9933
1600	80.2184	16.9985	15.8913
1601	88.2464	28.5028	16.1723
1602	60.5672	8.68162	14.4715
1603	78.9654	17.0303	15.395
1604	62.33	13.7713	15.771
1605	49.741	15.1687	14.9397
1606	73.4607	17.4368	15.4318
1607	76.4279	14.3042	16.3712
1608	60.2355	7.23432	15.9016
1609	55.9678	19.332	16.2292
1610	40.3537	12.4858	15.8596
1611	90.5603	14.2666	15.4282
1612	38.057	14.6282	16.0082
1613	54.7508	11.7798	15.3117
1614	82.6607	13.2462	16.3238
1615	75.5302	22.812	14.6295
1616	45.2968	17.5237	14.5045
1617	38.5232	13.9986	15.7037
1618	40.3227	11.7456	15.4472
1619	43.0974	17.7839	15.6594
1620	48.9506	10.649	14.8007
1621	49.0184	7.37523	15.31
1622	64.6203	17.3389	15.2319
1623	76.2031	19.9395	14.7835
1624	71.6169	24.5278	15.3472
1625	60.4634	19.3812	15.0681
1626	67.3905	11.1371	16.2953
1627	61.4458	18.319	15.7294
1628	73.6849	7.72717	15.1621
1629	48.7345	11.0039	16.3395
1630	81.7201	22.6095	16.1367
1631	72.9133	17.2766	15.652
1632	60.7748	20.3277	16.1204
1633	95.5122	13.1526	16.8094
1634	57.6383	8.79809	16.6944
1635	92.3601	10.0892	15.794
1636	63.5869	15.9503	16.234
1637	50.562	20.0993	16.6144
1638	66.7867	6.38238	17.0345
1639	68.5968	22.2463	17.1939
1640	90.8584	13.5349	14.6827
1641	65.8175	10.2653	16.3308
1642	60.5095	17.4002	15.3404
1643	90.2738	13.1736	17.0204
1644	61.8117	23.2332	14.4962
1645	79.0281	16.7211	15.7036
1646	80.2796	22.8386	16.381
1647	29.2987	7.70499	16.1163
1648	58.6742	23.8591	15.6677
1649	55.3178	10.0718	15.9069
1650	53.9056	25.4349	15.0577
1651	37.4331	27.5066	15.2598
1652	42.5795	13.9912	15.9925
1653	61.3159	15.2836	16.603
1654	87.5136	11.9508	14.465
1655	57.3578	17.8106	16.4612
1656	47.6983	15.054	14.7433
1657	57.5113	12.0982	16.8627
1658	61.5469	21.2971	16.0088
1659	75.0862	12.5863	16.098
1660	77.1601	23.3829	15.1886
1661	89.8642	18.0505	16.8131
1662	107.065	20.4694	15.2557
1663	37.7726	17.1423	16.0836
1664	49.0776	14.0501	16.6605
1665	91.5647	13.8526	16.2446
1666	44.5814	15.3496	16.3616
1667	88.6667	7.42776	15.9129
1668	63.7097	21.0273	16.3443
1669	48.9032	12.6697	15.9159
1670	83.9314	17.2325	15.7071
1671	48.9203	16.0939	16.2699
1672	68.5348	13.7423	16.3391
1673	78.663	13.048	15.8591
1674	65.1442	16.3179	15.8288
1675	51.957	13.9402	14.3038
1676	45.3125	12.4189	16.0921
1677	47.5149	28.2968	16.5811
1678	88.8754	11.1599	15.7304
1679	84.6749	19.3756	15.8344
1680	49.2883	15.1652	15.7559
1681	34.0938	12.9385	15.4565
1682	56.2894	10.8828	15.5639
1683	52.7702	25.0168	16.133
1684	56.3025	21.7715	15.0955
1685	60.0089	8.29257	15.9883
1686	62.575	16.2974	15.4453
1687	70.1056	20.0829	16.1749
1688	52.6531	23.7107	15.5439
1689	69.5096	20.8101	15.7337
1690	71.5621	13.5111	16.1729
1691	55.2112	13.4632	16.0853
1692	93.7333	10.0954	15.1262
1693	39.0488	19.0941	15.2113
1694	72.8317	8.31717	16.4939
1695	68.6945	21.5651	14.282
1696	27.0194	22.0648	16.2084
1697	61.3613	14.6367	15.5811
1698	75.4482	9.78081	16.6752
1699	67.0643	13.3485	16.1606
1700	53.5579	11.0239	15.3053
1701	75.4546	14.4249	15.899
1702	71.147	20.0752	16.8537
1703	60.9294	15.6131	15.9864
1704	82.7279	12.4838	15.345
1705	67.749	21.5608	16.0284
1706	61.9704	11.8859	15.4316
1707	68.0661	21.5195	15.6897
1708	97.2733	22.2857	15.216
1709	64.5394	16.0914	15.1194
1710	35.6126	16.0597	15.2349
1711	83.4474	21.3895	17.2428
1712	56.186	11.3701	16.5815
1713	50.6924	15.2155	15.3151
1714	37.3591	16.4234	16.1263
1715	73.5532	16.2601	17.3743
1716	42.0637	14.2685	16.2076
1717	38.1845	18.3362	14.8077
1718	56.5071	18.8132	15.681
1719	49.2551	17.079	15.0679
1720	51.1183	19.0443	16.3613
1721	83.3212	20.9235	15.8196
1722	57.6722	19.8068	15.928
1723	67.243	18.7828	15.7607
1724	36.8698	8.89108	15.9607
1725	45.086	20.3704	14.6893
1726	80.3005	16.0238	16.729
1727	80.6376	26.2702	16.226
1728	51.1156	14.7959	15.4962
1729	41.3674	8.12702	14.7415
1730	73.8475	19.305	17.2387
1731	73.8797	15.5534	15.4715
1732	73.902	16.8055	15.7931
1733	57.0818	18.2422	15.2634
1734	68.7821	20.7916	15.0338
1735	75.9684	16.2127	15.6557
1736	60.1141	14.0277	15.6099
1737	79.6951	16.0687	16.6665
1738	43.4368	5.9809	16.6172
1739	74.047	13.9544	15.1948
1740	52.7808	16.439	15.9033
1741	59.3827	15.4736	15.2862
1742	53.0982	9.80333	16.1642
1743	72.5546	20.799	15.03
1744	72.5711	9.86502	14.5807
1745	49.6552	18.9068	15.3526
1746	57.6886	25.7296	15.1163
1747	61.4202	16.0906	14.8037
1748	74.3664	10.5823	15.5113
1749	39.3598	28.0092	17.2696
1750	70.8948	14.0807	16.7264
1751	61.5691	19.8862	14.9002
1752	79.9492	11.8652	16.7958
1753	71.8156	17.4866	16.8566
1754	81.5373	17.9888	15.0791
1755	68.0772	11.9992	15.0783
1756	77.0238	19.0773	16.039
1757	47.0134	14.6783	17.6272
1758	51.4107	13.6242	16.04
1759	35.7932	16.8349	17.3094
1760	38.9243	15.8224	15.9913
1761	57.3131	10.1081	16.1722
1762	75.5141	23.7047	16.5378
1763	75.0089	21.4877	15.513
1764	43.5448	20.8302	16.2488
1765	46.9092	26.1391	14.8765
1766	34.8395	12.9618	15.7251
1767	26.9686	20.757	15.463
1768	52.8478	20.0793	15.1594
1769	56.9614	11.4171	16.608
1770	66.3244	21.9149	15.3233
1771	46.7902	12.6941	14.8934
1772	69.6639	14.1403	15.5763
1773	58.8294	15.9709	16.412
1774	64.5087	18.9122	16.2739
1775	44.6752	21.7005	15.796
1776	82.6505	24.5157	15.7822
1777	45.2232	11.5514	15.9421
1778	99.2662	16.5487	16.0789
1779	37.1396	12.2981	15.8347
1780	51.3988	11.9399	15.9994
1781	62.2401	12.4255	15.2259
1782	51.5621	17.0687	15.7347
1783	61.737	23.206	16.9716
1784	79.9644	13.8039	15.1679
1785	57.3517	12.1392	14.961
1786	69.454	17.2804	15.6345
1787	57.6556	18.7113	16.4037
1788	58.559	11.9696	16.0815
1789	72.5516	28.8174	15.0122
1790	56.9538	6.32285	15.8367
1791	42.9678	12.5335	14.6865
1792	83.001	15.4559	15.9281
1793	62.0339	20.5915	16.4451
1794	59.7253	15.8142	16.168
1795	55.7342	6.2493	14.6374
1796	73.5987	9.30276	16.7267
1797	77.0891	17.4371	17.5115
1798	75.7291	13.3775	15.9612
1799	65.6379	13.4362	16.8321
1800	72.3486	13.6012	15.5865
1801	60.9686	10.1472	17.4237
1802	58.801	13.1949	16.1976
1803	72.7709	9.03908	16.376
1804	65.0548	14.2937	15.15
1805	77.2392	15.4927	15.7998
1806	91.9583	17.1549	16.3406
1807	40.7968	10.4954	14.2238
1808	48.866	21.9848	14.2747
1809	69.7281	14.3565	14.1437
1810	51.3757	15.9467	15.4471
1811	60.0442	18.2374	17.0967
1812	40.4207	13.3793	16.4965
1813	83.6878	19.4434	16.0562
1814	52.8567	16.0425	16.1501
1815	46.3241	14.6318	16.5238
1816	55.3632	17.6729	15.2462
1817	98.0973	15.3192	16.1453
1818	69.9978	15.7209	13.8708
1819	89.2649	21.4388	16.2493
1820	67.526	11.5375	17.5024
1821	54.4916	11.2769	15.6728
1822	54.863	15.9095	13.4002
1823	36.6951	8.83432	15.6479
1824	71.2286	12.6736	16.0466
1825	75.748	17.9967	16.4712
1826	108.23	21.2788	16.491
1827	73.5839	15.0944	15.7956
1828	62.7782	15.0399	16.813
1829	27.4271	15.154	14.9442
1830	91.6181	22.3163	16.0559
1831	56.719	12.7949	16.3225
1832	55.2876	20.6084	16.4374
1833	74.5761	17.5624	16.1955
1834	62.2582	12.9448	15.1134
1835	65.9808	17.401	15.2255
1836	78.3122	15.3109	15.8357
1837	75.4847	24.8615	15.692
1838	32.2507	13.6205	14.0887
1839	73.3384	19.2552	16.3945
1840	45.9126	15.6704	14.1934
1841	49.799	18.0009	15.9619
1842	55.8509	23.5395	15.6806
1843	50.0325	9.79163	15.8172
1844	39.6012	18.1367	15.4602
1845	61.2906	14.7	16.1498
1846	33.9305	19.5451	14.3016
1847	67.1439	21.5505	16.7983
1848	39.6425	17.3779	15.6684
1849	46.0715	11.8527	16.0715
1850	95.2833	13.6737	15.2942
1851	57.5402	12.0648	16.4765
1852	65.9112	11.9413	14.9328
1853	65.2461	6.02262	16.3101
1854	70.9765	16.2731	16.8923
1855	45.804	15.1061	16.2682
1856	59.0872	17.6981	16.303
1857	87.3155	21.8709	17.132
1858	45.8586	21.5884	15.2234
1859	82.6618	12.2391	15.445
1860	71.4696	15.4283	14.8096
1861	49.2998	16.9268	16.604
1862	54.7903	17.8264	16.2335
1863	68.3579	23.455	16.418
1864	35.3037	23.3762	14.9096
1865	66.4617	20.0861	16.3652
1866	67.4324	15.3519	14.0178
1867	54.441	18.4451	16.4764
1868	68.9871	18.5302	15.9011
1869	77.9306	16.3631	15.1447
1870	52.3642	15.9297	16.082
1871	33.1539	21.287	15.4577
1872	105.763	10.5046	14.9784
1873	58.2344	13.9362	16.7317
1874	68.4859	17.5149	15.2341
1875	35.7862	12.384	16.4843
1876	64.9954	18.6836	16.3949
1877	74.5848	11.7132	15.5843
1878	26.9871	9.03072	15.6307
1879	32.7567	15.994	17.1956
1880	68.8549	14.9577	15.9866
1881	60.1141	16.8917	15.7817
1882	58.5009	14.2474	15.8294
1883	56.7334	12.0588	15.6842
1884	67.2134	15.3677	15.7234
1885	71.8703	6.52762	15.5648
1886	43.3204	21.974	16.2695
1887	98.5093	14.6212	16.2313
1888	86.1237	23.3071	16.3432
1889	54.1669	14.0717	16.1692
1890	82.8414	12.8398	15.7876
1891	29.4673	10.8254	16.2069
1892	44.3993	15.2464	15.6511
1893	63.5786	23.1152	16.9216
1894	76.4744	9.78094	17.1781
1895	51.1701	20.0789	14.6137
1896	59.0185	8.2602	17.2247
1897	62.9076	16.122	15.3452
1898	51.9267	11.1239	15.0271
1899	58.8793	6.48943	14.9893
1900	38.8431	13.6745	15.4569
1901	75.918	19.0188	15.2452
1902	48.9104	17.0343	16.1834
1903	81.4138	14.0001	16.6862
1904	53.7627	23.8964	14.8822
1905	37.7387	17.9236	14.6365
1906	64.6562	16.6726	15.6773
1907	60.794	20.4478	15.2757
1908	62.7906	12.9288	14.6129
1909	51.1401	17.7268	14.997
1910	33.8867	22.4643	17.0638
1911	80.8965	13.5593	16.119
1912	63.2186	12.2956	17.3032
1913	80.021	15.7205	15.8761
1914	33.3042	13.1927	15.9346
1915	76.3591	11.2678	16.711
1916	50.3866	16.4329	15.5566
1917	57.4949	18.6381	17.0939
1918	93.6802	14.8642	14.9349
1919	81.6548	13.5488	14.6661
1920	60.7529	12.3736	17.3179
1921	53.1936	13.5823	14.8231
1922	69.0168	18.356	16.2856
1923	57.5247	15.7693	17.1735
1924	41.9274	8.77632	14.8743
1925	83.8375	14.9554	16.4514
1926	48.2761	25.9842	14.7699
1927	66.4181	18.3142	15.9813
1928	57.589	17.8106	15.8457
1929	72.4475	17.0875	16.7064
1930	74.4995	15.8355	15.8528
1931	39.1688	22.8081	16.5406
1932	67.6507	17.9667	14.378
1933	44.0013	10.4396	14.4909
1934	27.4022	14.4447	16.883
1935	55.9868	10.7824	16.3687
1936	96.4938	9.83083	15.6919
1937	94.6389	15.8413	13.8883
1938	57.4363	7.01318	15.5316
1939	102.038	15.929	16.2821
1940	61.8456	24.2484	14.9324
1941	70.1804	16.2115	17.2285
1942	41.2738	22.5228	15.559
1943	61.8268	26.0097	17.0299
1944	71.2339	13.9015	16.1643
1945	71.2973	12.7624	15.3135
1946	79.7533	19.5809	14.6871
1947	38.2644	20.5964	15.6302
1948	28.0618	15.3083	14.7706
1949	80.2909	13.8971	15.1099
1950	50.9156	19.5925	15.2357
1951	102.367	21.7509	16.1872
1952	65.3409	10.4334	16.1789
1953	48.3643	18.9018	15.5586
1954	49.3127	9.96743	15.7353
1955	68.1879	16.1687	15.8654
1956	65.3745	14.14	16.9601
1957	43.312	16.352	13.933
1958	72.824	17.8789	17.4805
1959	76.284	13.684	15.0402
1960	57.8961	14.9452	16.7294
1961	65.1891	8.14672	16.3071
1962	79.7756	14.3471	15.9716
1963	79.7326	18.1268	15.2761
1964	54.7828	21.8749	15.7645
1965	69.5923	9.89115	15.3909
1966	80.6337	11.8175	15.5541
1967	65.6937	23.6307	16.4643
1968	57.5123	10.6933	15.4006
1969	59.843	19.5652	16.6003
1970	80.1622	19.762	15.7788
1971	43.547	15.3651	16.0997
1972	60.8327	21.9319	16.1598
1973	87.0631	13.0542	15.8303
1974	58.3489	14.7248	15.9049
1975	32.9775	12.3045	16.3654
1976	68.9885	14.4231	16.5246
1977	56.7818	20.358	16.3235
1978	66.6139	18.7333	15.9221
1979	73.583	15.7244	15.3769
1980	82.1567	12.9404	15.5814
1981	92.5172	13.4183	15.9666
1982	49.9457	14.199	17.0525
1983	55.8181	21.0968	15.5757
1984	71.1873	11.9888	18.0109
1985	56.5817	17.2848	15.8951
1986	51.6709	12.717	14.7909
1987	55.6311	15.2689	16.101
1988	63.8012	15.4131	16.0781
1989	38.6168	19.1718	15.2344
1990	68.1413	16.2062	16.2088
1991	88.358	14.4091	16.1138
1992	87.3909	22.0438	15.593
1993	57.8467	19.2329	16.7759
1994	49.6556	17.0243	16.474
1995	55.736	16.1	16.1893
1996	43.976	9.258	15.3829
1997	52.233	11.2448	15.8196
1998	31.517	14.1824	16.8136
1999	68.5361	15.8871	16.5685
[truncated: 8,001 more rows]

## Sheet: Simulation Output Values 1
Sim #	ADD	ADDc	CR	HQ
1	9.86448e-06	6.63434e-06	4.4229e-06	0.0328816
2	1.10574e-05	7.43667e-06	4.95778e-06	0.0368581
3	8.65878e-06	5.82346e-06	3.8823e-06	0.0288626
4	2.39143e-05	1.60836e-05	1.07224e-05	0.0797145
5	8.12021e-06	5.46124e-06	3.64083e-06	0.0270674
6	6.75881e-06	4.54563e-06	3.03042e-06	0.0225294
7	1.359e-05	9.13995e-06	6.0933e-06	0.0453001
8	1.11737e-05	7.51485e-06	5.0099e-06	0.0372456
9	5.4349e-06	3.65523e-06	2.43682e-06	0.0181163
10	1.27067e-05	8.54589e-06	5.69726e-06	0.0423557
11	1.97411e-05	1.32769e-05	8.85125e-06	0.0658038
12	1.69771e-05	1.14179e-05	7.61196e-06	0.0565904
13	1.79276e-05	1.20572e-05	8.03813e-06	0.0597587
14	1.45779e-05	9.80436e-06	6.53624e-06	0.048593
15	1.00887e-05	6.78518e-06	4.52345e-06	0.0336292
16	1.48682e-05	9.99959e-06	6.66639e-06	0.0495606
17	8.25235e-06	5.55011e-06	3.70007e-06	0.0275078
18	8.31791e-06	5.5942e-06	3.72947e-06	0.0277264
19	1.24217e-05	8.35418e-06	5.56945e-06	0.0414055
20	1.15548e-05	7.77119e-06	5.1808e-06	0.0385161
21	1.60067e-05	1.07653e-05	7.17687e-06	0.0533557
22	1.54828e-05	1.04129e-05	6.94196e-06	0.0516093
23	8.77971e-06	5.90478e-06	3.93652e-06	0.0292657
24	1.31766e-05	8.8619e-06	5.90794e-06	0.043922
25	1.25015e-05	8.4079e-06	5.60527e-06	0.0416718
26	1.03574e-05	6.96586e-06	4.64391e-06	0.0345247
27	1.22578e-05	8.24396e-06	5.49597e-06	0.0408593
28	1.04057e-05	6.99837e-06	4.66558e-06	0.0346858
29	1.05928e-05	7.12415e-06	4.74943e-06	0.0353092
30	1.49251e-05	1.00378e-05	6.69189e-06	0.0497502
31	1.27322e-05	8.56305e-06	5.7087e-06	0.0424408
32	1.20642e-05	8.11375e-06	5.40917e-06	0.0402139
33	1.01008e-05	6.79331e-06	4.52888e-06	0.0336695
34	1.26366e-05	8.49875e-06	5.66583e-06	0.0421221
35	7.71932e-06	5.19162e-06	3.46108e-06	0.0257311
36	5.60091e-06	3.76689e-06	2.51126e-06	0.0186697
37	8.20106e-06	5.51561e-06	3.67708e-06	0.0273369
38	1.69983e-05	1.14322e-05	7.62145e-06	0.0566609
39	8.72143e-06	5.86559e-06	3.91039e-06	0.0290714
40	8.19102e-06	5.50886e-06	3.67257e-06	0.0273034
41	4.09212e-06	2.75215e-06	1.83477e-06	0.0136404
42	1.67014e-05	1.12325e-05	7.48833e-06	0.0556713
43	1.10283e-05	7.41709e-06	4.94473e-06	0.0367611
44	4.07293e-06	2.73924e-06	1.82616e-06	0.0135764
45	1.42406e-05	9.5775e-06	6.385e-06	0.0474687
46	9.05463e-06	6.08968e-06	4.05979e-06	0.0301821
47	1.43998e-05	9.68455e-06	6.45637e-06	0.0479992
48	3.21823e-05	2.16442e-05	1.44294e-05	0.107274
49	1.20775e-05	8.12268e-06	5.41512e-06	0.0402582
50	1.34782e-05	9.06474e-06	6.04316e-06	0.0449273
51	1.79655e-05	1.20827e-05	8.05514e-06	0.0598851
52	1.17192e-05	7.88172e-06	5.25448e-06	0.0390639
53	1.41181e-05	9.4951e-06	6.33006e-06	0.0470602
54	1.49958e-05	1.00854e-05	6.7236e-06	0.049986
55	7.37696e-06	4.96137e-06	3.30758e-06	0.0245899
56	9.70652e-06	6.52811e-06	4.35207e-06	0.0323551
57	8.89564e-06	5.98276e-06	3.9885e-06	0.0296521
58	1.02397e-05	6.88669e-06	4.59112e-06	0.0341323
59	5.75775e-06	3.87237e-06	2.58158e-06	0.0191925
60	7.53923e-06	5.0705e-06	3.38033e-06	0.0251308
61	9.09192e-06	6.11476e-06	4.07651e-06	0.0303064
62	1.04875e-05	7.05336e-06	4.70224e-06	0.0349584
63	1.16806e-05	7.8558e-06	5.2372e-06	0.0389355
64	1.51548e-05	1.01923e-05	6.79489e-06	0.050516
65	4.57866e-06	3.07937e-06	2.05291e-06	0.0152622
66	6.075e-06	4.08573e-06	2.72382e-06	0.02025
67	1.78253e-05	1.19884e-05	7.99225e-06	0.0594176
68	7.95546e-06	5.35043e-06	3.56696e-06	0.0265182
69	7.39963e-06	4.97662e-06	3.31774e-06	0.0246654
70	1.69943e-05	1.14295e-05	7.61966e-06	0.0566476
71	1.47144e-05	9.89619e-06	6.59746e-06	0.0490482
72	7.01874e-06	4.72045e-06	3.14697e-06	0.0233958
73	1.2887e-05	8.66715e-06	5.7781e-06	0.0429567
74	1.46948e-05	9.88296e-06	6.58864e-06	0.0489826
75	1.63909e-05	1.10237e-05	7.34911e-06	0.0546363
76	1.27233e-05	8.55703e-06	5.70469e-06	0.0424109
77	9.82359e-06	6.60684e-06	4.40456e-06	0.0327453
78	2.46684e-05	1.65907e-05	1.10605e-05	0.0822279
79	2.72865e-05	1.83515e-05	1.22343e-05	0.090955
80	7.80427e-06	5.24875e-06	3.49917e-06	0.0260142
81	1.15837e-05	7.79063e-06	5.19375e-06	0.0386124
82	1.31456e-05	8.84106e-06	5.89404e-06	0.0438187
83	1.17154e-05	7.87915e-06	5.25277e-06	0.0390512
84	6.69865e-06	4.50517e-06	3.00345e-06	0.0223288
85	1.02487e-05	6.89273e-06	4.59515e-06	0.0341622
86	1.5365e-05	1.03337e-05	6.88916e-06	0.0512168
87	1.38831e-05	9.33706e-06	6.22471e-06	0.046277
88	1.365e-05	9.18031e-06	6.12021e-06	0.0455001
89	7.09488e-06	4.77165e-06	3.1811e-06	0.0236496
90	8.22889e-06	5.53433e-06	3.68955e-06	0.0274296
91	1.08326e-05	7.28545e-06	4.85697e-06	0.0361086
92	8.03745e-06	5.40558e-06	3.60372e-06	0.0267915
93	1.08033e-05	7.26573e-06	4.84382e-06	0.0360109
94	2.09555e-05	1.40936e-05	9.39573e-06	0.0698516
95	4.91681e-06	3.30679e-06	2.20453e-06	0.0163894
96	5.66323e-06	3.8088e-06	2.5392e-06	0.0188774
97	1.38036e-05	9.28359e-06	6.18906e-06	0.046012
98	6.81901e-06	4.58612e-06	3.05741e-06	0.02273
99	1.18936e-05	7.99905e-06	5.3327e-06	0.0396454
100	4.39905e-06	2.95857e-06	1.97238e-06	0.0146635
101	1.01315e-05	6.81392e-06	4.54261e-06	0.0337716
102	1.16441e-05	7.83126e-06	5.22084e-06	0.0388138
103	1.56761e-05	1.05429e-05	7.02861e-06	0.0522535
104	8.70069e-06	5.85164e-06	3.90109e-06	0.0290023
105	1.27478e-05	8.57355e-06	5.7157e-06	0.0424928
106	1.00997e-05	6.79253e-06	4.52836e-06	0.0336656
107	3.83873e-06	2.58173e-06	1.72115e-06	0.0127958
108	1.12529e-05	7.56814e-06	5.04543e-06	0.0375097
109	2.253e-05	1.51525e-05	1.01017e-05	0.0750999
110	1.08744e-05	7.31358e-06	4.87572e-06	0.0362481
111	5.93551e-06	3.99192e-06	2.66128e-06	0.019785
112	7.57818e-06	5.0967e-06	3.3978e-06	0.0252606
113	6.53001e-06	4.39175e-06	2.92784e-06	0.0217667
114	3.57118e-06	2.4018e-06	1.6012e-06	0.0119039
115	1.23201e-05	8.2859e-06	5.52393e-06	0.0410671
116	4.72212e-06	3.17586e-06	2.11724e-06	0.0157404
117	8.63921e-06	5.81029e-06	3.87353e-06	0.0287974
118	1.07272e-05	7.21458e-06	4.80972e-06	0.0357574
119	1.43166e-05	9.62859e-06	6.41906e-06	0.0477219
120	1.23814e-05	8.32709e-06	5.55139e-06	0.0412713
121	8.23271e-06	5.5369e-06	3.69127e-06	0.0274424
122	3.45207e-05	2.32169e-05	1.54779e-05	0.115069
123	7.25106e-06	4.8767e-06	3.25113e-06	0.0241702
124	7.70365e-06	5.18108e-06	3.45405e-06	0.0256788
125	5.28283e-06	3.55296e-06	2.36864e-06	0.0176094
126	9.83428e-06	6.61404e-06	4.40936e-06	0.0327809
127	2.05596e-05	1.38274e-05	9.21824e-06	0.0685321
128	1.16996e-05	7.86854e-06	5.24569e-06	0.0389986
129	1.30542e-05	8.77962e-06	5.85308e-06	0.0435142
130	1.2136e-05	8.16205e-06	5.44137e-06	0.0404533
131	1.48611e-05	9.9948e-06	6.6632e-06	0.0495369
132	8.44647e-06	5.68066e-06	3.78711e-06	0.0281549
133	1.30893e-05	8.80323e-06	5.86882e-06	0.0436312
134	7.24525e-06	4.87278e-06	3.24852e-06	0.0241508
135	1.24878e-05	8.39867e-06	5.59911e-06	0.041626
136	1.2896e-05	8.67317e-06	5.78211e-06	0.0429865
137	2.55088e-05	1.71559e-05	1.14373e-05	0.0850294
138	1.87465e-05	1.2608e-05	8.40532e-06	0.0624885
139	1.95638e-05	1.31576e-05	8.77174e-06	0.0652126
140	9.17106e-06	6.16799e-06	4.11199e-06	0.0305702
141	1.71511e-05	1.15349e-05	7.68995e-06	0.0571702
142	1.58038e-05	1.06288e-05	7.08588e-06	0.0526793
143	8.01279e-06	5.38899e-06	3.59266e-06	0.0267093
144	1.9848e-05	1.33488e-05	8.89919e-06	0.0661601
145	1.43549e-05	9.65439e-06	6.43626e-06	0.0478498
146	9.29598e-06	6.252e-06	4.168e-06	0.0309866
147	4.6135e-06	3.10281e-06	2.06854e-06	0.0153783
148	5.06319e-06	3.40524e-06	2.27016e-06	0.0168773
149	9.79374e-06	6.58677e-06	4.39118e-06	0.0326458
150	8.44222e-06	5.6778e-06	3.7852e-06	0.0281407
151	5.82238e-06	3.91584e-06	2.61056e-06	0.0194079
152	5.50052e-06	3.69937e-06	2.46625e-06	0.0183351
153	1.10151e-05	7.40819e-06	4.93879e-06	0.036717
154	2.37224e-05	1.59545e-05	1.06363e-05	0.0790746
155	1.45348e-05	9.77537e-06	6.51691e-06	0.0484493
156	8.28641e-06	5.57302e-06	3.71535e-06	0.0276214
157	6.81592e-06	4.58404e-06	3.05603e-06	0.0227197
158	1.30555e-05	8.78048e-06	5.85365e-06	0.0435184
159	1.52977e-05	1.02885e-05	6.85898e-06	0.0509924
160	7.11899e-06	4.78787e-06	3.19191e-06	0.02373
161	7.54501e-06	5.07439e-06	3.38293e-06	0.02515
162	7.52005e-06	5.0576e-06	3.37173e-06	0.0250668
163	1.21309e-05	8.15866e-06	5.43911e-06	0.0404365
164	1.12142e-05	7.5421e-06	5.02807e-06	0.0373807
165	1.44307e-05	9.70536e-06	6.47024e-06	0.0481023
166	1.15894e-05	7.79442e-06	5.19628e-06	0.0386313
167	5.18337e-06	3.48607e-06	2.32405e-06	0.0172779
168	1.44521e-05	9.71973e-06	6.47982e-06	0.0481736
169	1.48533e-05	9.98954e-06	6.65969e-06	0.0495108
170	7.55835e-06	5.08336e-06	3.38891e-06	0.0251945
171	5.54518e-06	3.7294e-06	2.48627e-06	0.0184839
172	1.40675e-05	9.4611e-06	6.3074e-06	0.0468917
173	1.65145e-05	1.11068e-05	7.40452e-06	0.0550482
174	9.13385e-06	6.14296e-06	4.09531e-06	0.0304462
175	8.76209e-06	5.89293e-06	3.92862e-06	0.029207
176	1.11396e-05	7.49194e-06	4.99463e-06	0.0371321
177	1.54663e-05	1.04019e-05	6.93458e-06	0.0515544
178	1.28225e-05	8.62375e-06	5.74917e-06	0.0427416
179	1.74642e-05	1.17455e-05	7.83037e-06	0.0582141
180	1.57008e-05	1.05595e-05	7.03969e-06	0.0523359
181	8.06286e-06	5.42267e-06	3.61511e-06	0.0268762
182	1.98505e-05	1.33504e-05	8.90028e-06	0.0661682
183	7.84293e-06	5.27476e-06	3.51651e-06	0.0261431
184	2.86909e-05	1.9296e-05	1.2864e-05	0.0956362
185	1.17002e-05	7.86898e-06	5.24598e-06	0.0390008
186	1.01621e-05	6.83448e-06	4.55632e-06	0.0338735
187	9.22741e-06	6.20589e-06	4.13726e-06	0.030758
188	5.83725e-06	3.92584e-06	2.61723e-06	0.0194575
189	1.39092e-05	9.35461e-06	6.23641e-06	0.046364
190	7.95366e-06	5.34923e-06	3.56615e-06	0.0265122
191	9.45155e-06	6.35663e-06	4.23775e-06	0.0315052
192	1.78028e-05	1.19733e-05	7.98218e-06	0.0593427
193	1.06803e-05	7.183e-06	4.78867e-06	0.0356009
194	5.50921e-06	3.70521e-06	2.47014e-06	0.018364
195	1.06279e-05	7.1478e-06	4.7652e-06	0.0354264
196	9.89642e-06	6.65583e-06	4.43722e-06	0.0329881
197	1.04508e-05	7.02868e-06	4.68579e-06	0.034836
198	1.92015e-05	1.2914e-05	8.60931e-06	0.0640051
199	6.59425e-06	4.43495e-06	2.95664e-06	0.0219808
200	8.85949e-06	5.95844e-06	3.97229e-06	0.0295316
201	9.64213e-06	6.4848e-06	4.3232e-06	0.0321404
202	1.09669e-05	7.37581e-06	4.9172e-06	0.0365565
203	9.01017e-06	6.05978e-06	4.03985e-06	0.0300339
204	8.23701e-06	5.53979e-06	3.69319e-06	0.0274567
205	1.22834e-05	8.26121e-06	5.50747e-06	0.0409448
206	1.0336e-05	6.9515e-06	4.63433e-06	0.0344535
207	9.14383e-06	6.14968e-06	4.09978e-06	0.0304794
208	1.00322e-05	6.74714e-06	4.49809e-06	0.0334406
209	1.0724e-05	7.21241e-06	4.80827e-06	0.0357466
210	1.05307e-05	7.08243e-06	4.72162e-06	0.0351024
211	7.20175e-06	4.84353e-06	3.22902e-06	0.0240058
212	8.7568e-06	5.88938e-06	3.92625e-06	0.0291893
213	4.53477e-06	3.04985e-06	2.03324e-06	0.0151159
214	1.5261e-05	1.02637e-05	6.8425e-06	0.0508699
215	9.36234e-06	6.29663e-06	4.19776e-06	0.0312078
216	9.46718e-06	6.36714e-06	4.24476e-06	0.0315573
217	3.08157e-05	2.07251e-05	1.38167e-05	0.102719
218	1.55329e-05	1.04466e-05	6.96441e-06	0.0517762
219	1.35734e-05	9.12875e-06	6.08583e-06	0.0452445
220	1.26681e-05	8.51994e-06	5.67996e-06	0.0422271
221	1.52125e-05	1.02311e-05	6.82076e-06	0.0507083
222	1.14883e-05	7.72645e-06	5.15096e-06	0.0382943
223	1.17243e-05	7.88519e-06	5.2568e-06	0.0390811
224	1.18462e-05	7.96716e-06	5.31144e-06	0.0394874
225	1.49209e-05	1.00351e-05	6.69004e-06	0.0497364
226	1.25188e-05	8.41952e-06	5.61301e-06	0.0417294
227	1.2052e-05	8.10559e-06	5.40373e-06	0.0401735
228	1.1647e-05	7.83318e-06	5.22212e-06	0.0388234
229	1.43622e-05	9.65928e-06	6.43952e-06	0.047874
230	1.07138e-05	7.20558e-06	4.80372e-06	0.0357128
231	9.6429e-06	6.48532e-06	4.32355e-06	0.032143
232	1.02506e-05	6.89405e-06	4.59603e-06	0.0341688
233	1.48669e-05	9.99869e-06	6.66579e-06	0.0495562
234	1.34167e-05	9.02341e-06	6.01561e-06	0.0447224
235	2.01459e-05	1.35491e-05	9.03272e-06	0.0671529
236	9.02988e-06	6.07303e-06	4.04869e-06	0.0300996
237	9.55625e-06	6.42705e-06	4.2847e-06	0.0318542
238	1.93835e-05	1.30363e-05	8.69089e-06	0.0646116
239	5.3153e-06	3.5748e-06	2.3832e-06	0.0177177
240	7.90711e-06	5.31792e-06	3.54528e-06	0.026357
241	7.07973e-06	4.76146e-06	3.17431e-06	0.0235991
242	9.65169e-06	6.49123e-06	4.32749e-06	0.0321723
243	1.19894e-05	8.06347e-06	5.37565e-06	0.0399647
244	9.58798e-06	6.44838e-06	4.29892e-06	0.0319599
245	1.12091e-05	7.5387e-06	5.0258e-06	0.0373638
246	5.6255e-06	3.78342e-06	2.52228e-06	0.0187517
247	1.02939e-05	6.92316e-06	4.61544e-06	0.034313
248	1.26354e-05	8.49792e-06	5.66528e-06	0.042118
249	7.68763e-06	5.17031e-06	3.44687e-06	0.0256254
250	1.17668e-05	7.91374e-06	5.27582e-06	0.0392226
251	1.10199e-05	7.41145e-06	4.94096e-06	0.0367331
252	9.31871e-06	6.26729e-06	4.17819e-06	0.0310624
253	1.39888e-05	9.40814e-06	6.27209e-06	0.0466293
254	5.34626e-06	3.59562e-06	2.39708e-06	0.0178209
255	7.45319e-06	5.01264e-06	3.34176e-06	0.024844
256	6.7212e-06	4.52034e-06	3.01356e-06	0.022404
257	1.75263e-05	1.17873e-05	7.85821e-06	0.0584211
258	1.526e-05	1.02631e-05	6.84207e-06	0.0508667
259	4.56957e-06	3.07326e-06	2.04884e-06	0.0152319
260	7.39951e-06	4.97653e-06	3.31769e-06	0.024665
261	6.85542e-06	4.6106e-06	3.07374e-06	0.0228514
262	1.65652e-05	1.11409e-05	7.42726e-06	0.0552173
263	1.16115e-05	7.80928e-06	5.20619e-06	0.0387049
264	1.27963e-05	8.60616e-06	5.73744e-06	0.0426545
265	6.3802e-06	4.291e-06	2.86066e-06	0.0212673
266	8.00365e-06	5.38284e-06	3.58856e-06	0.0266788
267	1.65957e-05	1.11614e-05	7.44093e-06	0.0553189
268	8.74313e-06	5.88018e-06	3.92012e-06	0.0291438
269	1.10247e-05	7.41467e-06	4.94311e-06	0.0367491
270	9.51413e-06	6.39872e-06	4.26581e-06	0.0317138
271	1.56467e-05	1.05232e-05	7.01545e-06	0.0521556
272	1.50042e-05	1.00911e-05	6.72737e-06	0.050014
273	1.16638e-05	7.84445e-06	5.22963e-06	0.0388792
274	1.20299e-05	8.09067e-06	5.39378e-06	0.0400995
275	1.02758e-05	6.91095e-06	4.6073e-06	0.0342525
276	1.36322e-05	9.16831e-06	6.1122e-06	0.0454406
277	1.88229e-05	1.26593e-05	8.43954e-06	0.0627429
278	9.68008e-06	6.51033e-06	4.34022e-06	0.0322669
279	9.70331e-06	6.52595e-06	4.35063e-06	0.0323444
280	5.51361e-06	3.70818e-06	2.47212e-06	0.0183787
281	1.012e-05	6.80618e-06	4.53745e-06	0.0337332
282	2.04926e-05	1.37823e-05	9.18817e-06	0.0683086
283	1.00839e-05	6.78193e-06	4.52128e-06	0.0336131
284	1.53e-05	1.029e-05	6.86002e-06	0.0510001
285	2.58485e-05	1.73844e-05	1.15896e-05	0.0861617
286	1.29057e-05	8.67974e-06	5.78649e-06	0.0430191
287	4.70188e-06	3.16225e-06	2.10817e-06	0.0156729
288	9.7611e-06	6.56482e-06	4.37654e-06	0.032537
289	7.06484e-06	4.75145e-06	3.16764e-06	0.0235495
290	9.33177e-06	6.27607e-06	4.18405e-06	0.0311059
291	1.33062e-05	8.94908e-06	5.96605e-06	0.044354
292	4.54233e-06	3.05494e-06	2.03663e-06	0.0151411
293	1.56482e-05	1.05242e-05	7.01611e-06	0.0521606
294	1.17222e-05	7.88375e-06	5.25583e-06	0.039074
295	4.53078e-06	3.04717e-06	2.03145e-06	0.0151026
296	5.54865e-06	3.73174e-06	2.48783e-06	0.0184955
297	1.13777e-05	7.65208e-06	5.10138e-06	0.0379257
298	7.36127e-06	4.95082e-06	3.30054e-06	0.0245376
299	6.15588e-06	4.14013e-06	2.76009e-06	0.0205196
300	1.06061e-05	7.13315e-06	4.75543e-06	0.0353538
301	1.29624e-05	8.71786e-06	5.81191e-06	0.043208
302	1.03276e-05	6.94579e-06	4.63052e-06	0.0344252
303	8.02047e-06	5.39416e-06	3.59611e-06	0.0267349
304	7.05762e-06	4.7466e-06	3.1644e-06	0.0235254
305	6.68605e-06	4.4967e-06	2.9978e-06	0.0222868
306	1.26775e-05	8.52624e-06	5.68416e-06	0.0422583
307	1.47523e-05	9.92167e-06	6.61445e-06	0.0491745
308	2.08323e-05	1.40107e-05	9.3405e-06	0.069441
309	8.41376e-06	5.65866e-06	3.77244e-06	0.0280459
310	7.38146e-06	4.96439e-06	3.3096e-06	0.0246049
311	1.2472e-05	8.388e-06	5.592e-06	0.0415732
312	9.9495e-06	6.69152e-06	4.46102e-06	0.033165
313	8.67669e-06	5.8355e-06	3.89033e-06	0.0289223
314	1.07922e-05	7.25828e-06	4.83885e-06	0.035974
315	1.38319e-05	9.30261e-06	6.20174e-06	0.0461062
316	5.08662e-06	3.421e-06	2.28067e-06	0.0169554
317	5.80955e-06	3.90721e-06	2.6048e-06	0.0193652
318	6.33087e-06	4.25782e-06	2.83855e-06	0.0211029
319	1.29984e-05	8.74207e-06	5.82805e-06	0.0433281
320	7.3385e-06	4.9355e-06	3.29033e-06	0.0244617
321	1.43964e-05	9.68227e-06	6.45485e-06	0.0479879
322	7.85656e-06	5.28392e-06	3.52262e-06	0.0261885
323	1.58345e-05	1.06495e-05	7.09964e-06	0.0527816
324	6.77475e-06	4.55635e-06	3.03757e-06	0.0225825
325	6.25578e-06	4.20732e-06	2.80488e-06	0.0208526
326	1.08207e-05	7.27746e-06	4.85164e-06	0.036069
327	1.21125e-05	8.14622e-06	5.43081e-06	0.0403749
328	7.09955e-06	4.77479e-06	3.1832e-06	0.0236652
329	6.86464e-06	4.61681e-06	3.07787e-06	0.0228821
330	5.9818e-06	4.02305e-06	2.68204e-06	0.0199393
331	4.10876e-06	2.76334e-06	1.84223e-06	0.0136959
332	6.74627e-06	4.5372e-06	3.0248e-06	0.0224876
333	3.7962e-06	2.55313e-06	1.70209e-06	0.012654
334	7.54032e-06	5.07123e-06	3.38082e-06	0.0251344
335	1.08472e-05	7.29524e-06	4.86349e-06	0.0361572
336	6.6815e-06	4.49364e-06	2.99576e-06	0.0222717
337	9.50854e-06	6.39496e-06	4.26331e-06	0.0316951
338	1.78975e-05	1.2037e-05	8.02465e-06	0.0596585
339	1.1645e-05	7.83183e-06	5.22122e-06	0.0388167
340	8.28435e-06	5.57163e-06	3.71442e-06	0.0276145
341	7.27128e-06	4.89029e-06	3.2602e-06	0.0242376
342	1.3288e-05	8.93686e-06	5.95791e-06	0.0442935
343	1.04377e-05	7.01989e-06	4.67993e-06	0.0347925
344	1.30012e-05	8.74393e-06	5.82929e-06	0.0433373
345	1.96753e-05	1.32326e-05	8.82174e-06	0.0655843
346	1.31524e-05	8.84566e-06	5.8971e-06	0.0438414
347	9.52915e-06	6.40882e-06	4.27255e-06	0.0317638
348	6.28664e-06	4.22807e-06	2.81872e-06	0.0209555
349	1.07761e-05	7.24746e-06	4.83164e-06	0.0359204
350	1.74404e-05	1.17295e-05	7.8197e-06	0.0581348
351	9.88578e-06	6.64867e-06	4.43245e-06	0.0329526
352	9.74448e-06	6.55364e-06	4.3691e-06	0.0324816
353	6.78998e-06	4.5666e-06	3.0444e-06	0.0226333
354	1.27192e-05	8.5543e-06	5.70287e-06	0.0423974
355	1.19698e-05	8.05029e-06	5.36686e-06	0.0398994
356	1.71533e-05	1.15364e-05	7.69095e-06	0.0571776
357	9.41343e-06	6.33099e-06	4.22066e-06	0.0313781
358	5.67231e-06	3.8149e-06	2.54327e-06	0.0189077
359	9.18898e-06	6.18004e-06	4.12003e-06	0.0306299
360	1.18404e-05	7.96323e-06	5.30882e-06	0.0394679
361	1.04114e-05	7.00216e-06	4.66811e-06	0.0347046
362	1.73219e-05	1.16498e-05	7.76654e-06	0.0577396
363	8.60944e-06	5.79027e-06	3.86018e-06	0.0286981
364	7.79346e-06	5.24149e-06	3.49432e-06	0.0259782
365	6.68988e-06	4.49927e-06	2.99952e-06	0.0222996
366	3.95579e-06	2.66046e-06	1.77364e-06	0.013186
367	1.52909e-05	1.02839e-05	6.85594e-06	0.0509698
368	1.37933e-05	9.27669e-06	6.18446e-06	0.0459777
369	1.50392e-05	1.01146e-05	6.74306e-06	0.0501306
370	2.16334e-05	1.45495e-05	9.69967e-06	0.0721113
371	1.60827e-05	1.08164e-05	7.21091e-06	0.0536088
372	1.63818e-05	1.10176e-05	7.34506e-06	0.0546061
373	8.89433e-06	5.98187e-06	3.98792e-06	0.0296478
374	1.33504e-05	8.97877e-06	5.98584e-06	0.0445012
375	1.15123e-05	7.74259e-06	5.16173e-06	0.0383744
376	1.768e-05	1.18907e-05	7.92712e-06	0.0589334
377	4.42759e-06	2.97777e-06	1.98518e-06	0.0147586
378	1.8147e-05	1.22047e-05	8.13648e-06	0.0604899
379	1.04476e-05	7.02653e-06	4.68435e-06	0.0348254
380	9.0205e-06	6.06673e-06	4.04448e-06	0.0300683
381	8.73671e-06	5.87587e-06	3.91724e-06	0.0291224
382	1.83996e-05	1.23747e-05	8.24977e-06	0.0613321
383	1.02142e-05	6.86954e-06	4.57969e-06	0.0340473
384	1.42029e-05	9.55213e-06	6.36809e-06	0.0473429
385	1.25499e-05	8.44042e-06	5.62695e-06	0.041833
386	8.79956e-06	5.91813e-06	3.94542e-06	0.0293319
387	1.39107e-05	9.3556e-06	6.23707e-06	0.0463689
388	8.78117e-06	5.90577e-06	3.93718e-06	0.0292706
389	6.44238e-06	4.33282e-06	2.88854e-06	0.0214746
390	6.91018e-06	4.64743e-06	3.09829e-06	0.0230339
391	8.97847e-06	6.03846e-06	4.02564e-06	0.0299282
392	6.0391e-06	4.06159e-06	2.70773e-06	0.0201303
393	1.94626e-05	1.30895e-05	8.72635e-06	0.0648752
394	9.22096e-06	6.20155e-06	4.13436e-06	0.0307365
395	1.17013e-05	7.86971e-06	5.24648e-06	0.0390044
396	8.53277e-06	5.73871e-06	3.8258e-06	0.0284426
397	3.4859e-06	2.34444e-06	1.56296e-06	0.0116197
398	5.84708e-06	3.93245e-06	2.62163e-06	0.0194903
399	9.74272e-06	6.55246e-06	4.3683e-06	0.0324757
400	6.83551e-06	4.59722e-06	3.06481e-06	0.022785
401	1.22371e-05	8.23002e-06	5.48668e-06	0.0407902
402	1.26768e-05	8.52577e-06	5.68385e-06	0.042256
403	1.42271e-05	9.56843e-06	6.37896e-06	0.0474237
404	7.18983e-06	4.83551e-06	3.22367e-06	0.0239661
405	8.23732e-06	5.54e-06	3.69333e-06	0.0274577
406	3.01711e-05	2.02916e-05	1.35277e-05	0.10057
407	6.56617e-06	4.41607e-06	2.94405e-06	0.0218872
408	1.03289e-05	6.94668e-06	4.63112e-06	0.0344296
409	1.01826e-05	6.84832e-06	4.56555e-06	0.0339421
410	1.7427e-05	1.17205e-05	7.81368e-06	0.05809
411	2.90619e-05	1.95456e-05	1.30304e-05	0.0968731
412	7.60821e-06	5.1169e-06	3.41126e-06	0.0253607
413	4.09615e-06	2.75486e-06	1.83658e-06	0.0136538
414	1.54885e-05	1.04168e-05	6.94451e-06	0.0516283
415	1.50599e-05	1.01285e-05	6.75236e-06	0.0501997
416	1.32841e-05	8.93419e-06	5.95613e-06	0.0442803
417	7.47759e-06	5.02905e-06	3.3527e-06	0.0249253
418	1.2309e-05	8.27839e-06	5.51893e-06	0.0410299
419	8.46795e-06	5.69511e-06	3.79674e-06	0.0282265
420	1.17842e-05	7.92544e-06	5.28362e-06	0.0392806
421	1.08402e-05	7.29057e-06	4.86038e-06	0.036134
422	9.82433e-06	6.60735e-06	4.4049e-06	0.0327478
423	8.90723e-06	5.99055e-06	3.9937e-06	0.0296908
424	9.69665e-06	6.52147e-06	4.34765e-06	0.0323222
425	2.53152e-05	1.70257e-05	1.13505e-05	0.084384
426	1.56261e-05	1.05093e-05	7.00623e-06	0.0520871
427	1.43573e-05	9.65602e-06	6.43734e-06	0.0478578
428	9.36512e-06	6.2985e-06	4.199e-06	0.0312171
429	9.98225e-06	6.71356e-06	4.4757e-06	0.0332742
430	9.39678e-06	6.31979e-06	4.2132e-06	0.0313226
431	5.16559e-06	3.47411e-06	2.31607e-06	0.0172186
432	3.40356e-06	2.28906e-06	1.52604e-06	0.0113452
433	8.12721e-06	5.46594e-06	3.64396e-06	0.0270907
434	1.12441e-05	7.56223e-06	5.04149e-06	0.0374805
435	1.16129e-05	7.81021e-06	5.20681e-06	0.0387095
436	1.0372e-05	6.97569e-06	4.65046e-06	0.0345734
437	1.80946e-05	1.21695e-05	8.11302e-06	0.0603155
438	1.43587e-05	9.65696e-06	6.43797e-06	0.0478625
439	1.64987e-05	1.10962e-05	7.39744e-06	0.0549955
440	1.3941e-05	9.37604e-06	6.25069e-06	0.0464701
441	8.2635e-06	5.55761e-06	3.70507e-06	0.027545
442	1.36264e-05	9.1644e-06	6.1096e-06	0.0454212
443	1.57047e-05	1.05622e-05	7.04146e-06	0.052349
444	8.2228e-06	5.53024e-06	3.68683e-06	0.0274093
445	1.05069e-05	7.06638e-06	4.71092e-06	0.0350229
446	4.64235e-06	3.12221e-06	2.08147e-06	0.0154745
447	2.78655e-06	1.87409e-06	1.24939e-06	0.00928848
448	8.68568e-06	5.84155e-06	3.89436e-06	0.0289523
449	1.08381e-05	7.28918e-06	4.85946e-06	0.0361271
450	2.46978e-05	1.66105e-05	1.10737e-05	0.0823261
451	8.80374e-06	5.92094e-06	3.9473e-06	0.0293458
452	1.25442e-05	8.4366e-06	5.6244e-06	0.0418141
453	1.91781e-05	1.28982e-05	8.5988e-06	0.0639269
454	8.25906e-06	5.55462e-06	3.70308e-06	0.0275302
455	5.74221e-06	3.86192e-06	2.57461e-06	0.0191407
456	5.67165e-06	3.81446e-06	2.54297e-06	0.0189055
457	5.8063e-06	3.90502e-06	2.60335e-06	0.0193543
458	1.56857e-05	1.05494e-05	7.03295e-06	0.0522858
459	1.29516e-05	8.71058e-06	5.80706e-06	0.043172
460	1.63831e-05	1.10185e-05	7.34564e-06	0.0546104
461	9.4343e-06	6.34503e-06	4.23002e-06	0.0314477
462	3.62489e-06	2.43792e-06	1.62528e-06	0.012083
463	1.78577e-05	1.20102e-05	8.00679e-06	0.0595257
464	9.03505e-06	6.07652e-06	4.05101e-06	0.0301168
465	2.044e-05	1.37469e-05	9.16462e-06	0.0681334
466	1.08995e-05	7.33046e-06	4.88698e-06	0.0363317
467	8.03463e-06	5.40368e-06	3.60245e-06	0.0267821
468	1.51961e-05	1.02202e-05	6.81343e-06	0.0506538
469	1.11317e-05	7.48663e-06	4.99109e-06	0.0371057
470	2.45341e-05	1.65004e-05	1.10003e-05	0.0817805
471	1.33123e-05	8.95318e-06	5.96879e-06	0.0443744
472	1.30425e-05	8.77171e-06	5.84781e-06	0.0434749
473	9.47018e-06	6.36916e-06	4.24611e-06	0.0315673
474	1.13716e-05	7.64798e-06	5.09865e-06	0.0379054
475	8.06005e-06	5.42078e-06	3.61385e-06	0.0268668
476	5.6088e-06	3.77219e-06	2.5148e-06	0.018696
477	9.23677e-06	6.21218e-06	4.14146e-06	0.0307892
478	7.44682e-06	5.00835e-06	3.3389e-06	0.0248227
479	7.92038e-06	5.32684e-06	3.55123e-06	0.0264013
480	1.45442e-05	9.78171e-06	6.52114e-06	0.0484808
481	1.31664e-05	8.85505e-06	5.90336e-06	0.043888
482	1.16974e-05	7.86708e-06	5.24472e-06	0.0389914
483	9.31616e-06	6.26557e-06	4.17705e-06	0.0310539
484	1.205e-05	8.10425e-06	5.40283e-06	0.0401668
485	1.69914e-05	1.14276e-05	7.61838e-06	0.0566381
486	5.53206e-06	3.72058e-06	2.48039e-06	0.0184402
487	1.4506e-05	9.75599e-06	6.50399e-06	0.0483533
488	1.15021e-05	7.73576e-06	5.15717e-06	0.0383405
489	4.67537e-06	3.14442e-06	2.09628e-06	0.0155846
490	1.03948e-05	6.99099e-06	4.66066e-06	0.0346492
491	2.02095e-05	1.35919e-05	9.06125e-06	0.067365
492	9.64086e-06	6.48395e-06	4.32263e-06	0.0321362
493	8.57071e-06	5.76422e-06	3.84281e-06	0.028569
494	9.90813e-06	6.6637e-06	4.44247e-06	0.0330271
495	1.56017e-05	1.04929e-05	6.99527e-06	0.0520056
496	9.69838e-06	6.52264e-06	4.34842e-06	0.0323279
497	1.37581e-05	9.25298e-06	6.16865e-06	0.0458603
498	1.22448e-05	8.23521e-06	5.49014e-06	0.0408159
499	1.97493e-05	1.32824e-05	8.85491e-06	0.0658309
500	1.08841e-05	7.32009e-06	4.88006e-06	0.0362803
501	1.01809e-05	6.84713e-06	4.56475e-06	0.0339362
502	5.58528e-06	3.75638e-06	2.50425e-06	0.0186176
503	1.02836e-05	6.9162e-06	4.6108e-06	0.0342785
504	7.59353e-06	5.10702e-06	3.40468e-06	0.0253118
505	2.06336e-05	1.38771e-05	9.2514e-06	0.0687786
506	1.08427e-05	7.29224e-06	4.86149e-06	0.0361423
507	2.53212e-05	1.70298e-05	1.13532e-05	0.0844041
508	8.01551e-06	5.39083e-06	3.59388e-06	0.0267184
509	1.24545e-05	8.37629e-06	5.58419e-06	0.0415151
510	1.03645e-05	6.97066e-06	4.64711e-06	0.0345485
511	1.31585e-05	8.84974e-06	5.89982e-06	0.0438617
512	8.82493e-06	5.9352e-06	3.9568e-06	0.0294164
513	1.01219e-05	6.80746e-06	4.5383e-06	0.0337396
514	1.30984e-05	8.80929e-06	5.87286e-06	0.0436612
515	1.05037e-05	7.06427e-06	4.70951e-06	0.0350124
516	1.19243e-05	8.01969e-06	5.34646e-06	0.0397478
517	1.41467e-05	9.51432e-06	6.34288e-06	0.0471555
518	1.52214e-05	1.02371e-05	6.82475e-06	0.0507379
519	1.20839e-05	8.12705e-06	5.41803e-06	0.0402798
520	7.9975e-06	5.37871e-06	3.58581e-06	0.0266583
521	1.07236e-05	7.21214e-06	4.80809e-06	0.0357453
522	7.24687e-06	4.87387e-06	3.24925e-06	0.0241562
523	1.24816e-05	8.39449e-06	5.59632e-06	0.0416053
524	8.69375e-06	5.84697e-06	3.89798e-06	0.0289792
525	9.61477e-06	6.46641e-06	4.31094e-06	0.0320492
526	1.19579e-05	8.04226e-06	5.3615e-06	0.0398596
527	1.29213e-05	8.69021e-06	5.79347e-06	0.043071
528	9.25551e-06	6.22478e-06	4.14986e-06	0.0308517
529	1.26238e-05	8.49009e-06	5.66006e-06	0.0420792
530	1.57618e-05	1.06006e-05	7.06704e-06	0.0525392
531	1.80208e-05	1.21199e-05	8.07991e-06	0.0600693
532	1.26968e-05	8.53921e-06	5.69281e-06	0.0423226
533	9.15963e-06	6.1603e-06	4.10687e-06	0.0305321
534	1.14028e-05	7.66896e-06	5.11264e-06	0.0380094
535	7.69379e-06	5.17445e-06	3.44963e-06	0.025646
536	1.59133e-05	1.07025e-05	7.13497e-06	0.0530442
537	2.91054e-05	1.95748e-05	1.30499e-05	0.0970181
538	1.48849e-05	1.00108e-05	6.67389e-06	0.0496163
539	1.11495e-05	7.49859e-06	4.99906e-06	0.037165
540	9.12155e-06	6.13469e-06	4.08979e-06	0.0304052
541	1.07798e-05	7.24997e-06	4.83331e-06	0.0359328
542	7.29461e-06	4.90598e-06	3.27066e-06	0.0243154
543	8.50165e-06	5.71778e-06	3.81185e-06	0.0283388
544	1.65925e-05	1.11593e-05	7.43952e-06	0.0553084
545	1.09594e-05	7.37076e-06	4.91384e-06	0.0365315
546	1.10724e-05	7.44671e-06	4.96447e-06	0.0369079
547	7.36159e-06	4.95103e-06	3.30068e-06	0.0245386
548	1.06705e-05	7.17645e-06	4.7843e-06	0.0355684
549	8.42632e-06	5.66711e-06	3.77808e-06	0.0280877
550	8.98491e-06	6.04279e-06	4.02853e-06	0.0299497
551	6.61234e-06	4.44712e-06	2.96475e-06	0.0220411
552	8.81808e-06	5.93059e-06	3.95373e-06	0.0293936
553	2.20401e-05	1.48231e-05	9.88205e-06	0.0734671
554	2.00884e-05	1.35104e-05	9.00695e-06	0.0669613
555	1.10158e-05	7.40869e-06	4.93913e-06	0.0367195
556	1.07647e-05	7.23977e-06	4.82651e-06	0.0358822
557	6.18115e-06	4.15713e-06	2.77142e-06	0.0206038
558	7.32505e-06	4.92645e-06	3.2843e-06	0.0244168
559	7.29416e-06	4.90568e-06	3.27046e-06	0.0243139
560	1.84139e-05	1.23842e-05	8.25615e-06	0.0613795
561	1.2994e-05	8.73911e-06	5.82607e-06	0.0433134
562	5.18972e-06	3.49034e-06	2.32689e-06	0.0172991
563	1.07866e-05	7.25454e-06	4.83636e-06	0.0359554
564	1.10401e-05	7.42504e-06	4.95002e-06	0.0368005
565	1.04808e-05	7.04886e-06	4.69924e-06	0.034936
566	1.20088e-05	8.07651e-06	5.38434e-06	0.0400294
567	1.134e-05	7.62671e-06	5.08447e-06	0.0378
568	1.4336e-05	9.64165e-06	6.42777e-06	0.0477866
569	1.20385e-05	8.09649e-06	5.39766e-06	0.0401284
570	1.18554e-05	7.97332e-06	5.31555e-06	0.0395179
571	6.99117e-06	4.70191e-06	3.1346e-06	0.0233039
572	1.20026e-05	8.07234e-06	5.38156e-06	0.0400087
573	1.172e-05	7.88224e-06	5.25483e-06	0.0390665
574	1.42867e-05	9.60851e-06	6.40567e-06	0.0476223
575	1.75378e-05	1.17951e-05	7.86337e-06	0.0584595
576	7.93377e-06	5.33585e-06	3.55723e-06	0.0264459
577	1.11564e-05	7.50324e-06	5.00216e-06	0.0371881
578	6.07968e-06	4.08888e-06	2.72592e-06	0.0202656
579	5.36617e-06	3.60901e-06	2.40601e-06	0.0178872
580	1.05666e-05	7.10653e-06	4.73769e-06	0.0352219
581	9.42933e-06	6.34169e-06	4.22779e-06	0.0314311
582	9.88586e-06	6.64872e-06	4.43248e-06	0.0329529
583	1.63866e-05	1.10208e-05	7.34722e-06	0.0546222
584	6.79675e-06	4.57115e-06	3.04743e-06	0.0226558
585	1.16285e-05	7.82075e-06	5.21383e-06	0.0387617
586	1.17905e-05	7.92966e-06	5.28644e-06	0.0393015
587	5.65782e-06	3.80516e-06	2.53677e-06	0.0188594
588	7.40712e-06	4.98165e-06	3.3211e-06	0.0246904
589	8.86141e-06	5.95973e-06	3.97316e-06	0.029538
590	1.35452e-05	9.10984e-06	6.07322e-06	0.0451508
591	9.25055e-06	6.22145e-06	4.14763e-06	0.0308352
592	1.43119e-05	9.62543e-06	6.41695e-06	0.0477062
593	1.25666e-05	8.45164e-06	5.63443e-06	0.0418886
594	1.10737e-05	7.4476e-06	4.96506e-06	0.0369123
595	3.26473e-06	2.19569e-06	1.46379e-06	0.0108824
596	7.87959e-06	5.29941e-06	3.53294e-06	0.0262653
597	7.40169e-06	4.978e-06	3.31867e-06	0.0246723
598	1.4089e-05	9.47557e-06	6.31705e-06	0.0469635
599	1.01689e-05	6.83907e-06	4.55938e-06	0.0338962
600	1.07715e-05	7.24439e-06	4.82959e-06	0.0359051
601	1.81193e-05	1.21861e-05	8.12407e-06	0.0603976
602	9.40918e-06	6.32814e-06	4.21876e-06	0.0313639
603	1.30511e-05	8.77751e-06	5.85168e-06	0.0435037
604	1.48634e-05	9.99635e-06	6.66423e-06	0.0495446
605	1.09709e-05	7.37846e-06	4.91897e-06	0.0365696
606	1.55211e-05	1.04387e-05	6.95914e-06	0.0517371
607	1.00165e-05	6.73656e-06	4.49104e-06	0.0333882
608	1.34491e-05	9.04518e-06	6.03012e-06	0.0448303
609	1.26555e-05	8.51141e-06	5.67428e-06	0.0421849
610	7.79188e-06	5.24042e-06	3.49362e-06	0.0259729
611	6.80094e-06	4.57397e-06	3.04931e-06	0.0226698
612	8.72409e-06	5.86738e-06	3.91159e-06	0.0290803
613	1.043e-05	7.01467e-06	4.67645e-06	0.0347666
614	1.06254e-05	7.14608e-06	4.76405e-06	0.0354179
615	1.16826e-05	7.85713e-06	5.23809e-06	0.0389421
616	1.22587e-05	8.24457e-06	5.49638e-06	0.0408623
617	9.57087e-06	6.43688e-06	4.29125e-06	0.0319029
618	1.58438e-05	1.06557e-05	7.10383e-06	0.0528127
619	2.29057e-05	1.54052e-05	1.02702e-05	0.0763525
620	8.67986e-06	5.83763e-06	3.89175e-06	0.0289329
621	1.3679e-05	9.19979e-06	6.13319e-06	0.0455966
622	9.40507e-06	6.32537e-06	4.21692e-06	0.0313502
623	6.03264e-06	4.05725e-06	2.70483e-06	0.0201088
624	9.45611e-06	6.3597e-06	4.2398e-06	0.0315204
625	5.54708e-06	3.73068e-06	2.48712e-06	0.0184903
626	4.63327e-06	3.1161e-06	2.0774e-06	0.0154442
627	1.28897e-05	8.66892e-06	5.77928e-06	0.0429655
628	9.08974e-06	6.1133e-06	4.07553e-06	0.0302991
629	5.78915e-06	3.89348e-06	2.59566e-06	0.0192972
630	6.0932e-06	4.09797e-06	2.73198e-06	0.0203107
631	1.10358e-05	7.42213e-06	4.94809e-06	0.0367861
632	1.77334e-05	1.19266e-05	7.95105e-06	0.0591113
633	9.55257e-06	6.42457e-06	4.28305e-06	0.0318419
634	6.21909e-06	4.18264e-06	2.78843e-06	0.0207303
635	7.87674e-06	5.29749e-06	3.53166e-06	0.0262558
636	6.8796e-06	4.62687e-06	3.08458e-06	0.022932
637	1.3148e-05	8.84268e-06	5.89512e-06	0.0438267
638	1.47631e-05	9.92889e-06	6.61926e-06	0.0492103
639	1.81168e-05	1.21844e-05	8.12294e-06	0.0603892
640	1.37182e-05	9.22614e-06	6.15076e-06	0.0457272
641	8.76668e-06	5.89602e-06	3.93068e-06	0.0292223
642	9.84929e-06	6.62413e-06	4.41609e-06	0.032831
643	1.64568e-05	1.1068e-05	7.37866e-06	0.0548559
644	9.91691e-06	6.66961e-06	4.44641e-06	0.0330564
645	1.11996e-05	7.53229e-06	5.02153e-06	0.037332
646	9.44306e-06	6.35092e-06	4.23395e-06	0.0314769
647	9.88937e-06	6.65108e-06	4.43406e-06	0.0329646
648	1.21596e-05	8.17795e-06	5.45197e-06	0.0405321
649	8.91111e-06	5.99316e-06	3.99544e-06	0.0297037
650	9.55772e-06	6.42803e-06	4.28536e-06	0.0318591
651	1.55686e-05	1.04706e-05	6.98041e-06	0.0518952
652	5.36329e-06	3.60707e-06	2.40472e-06	0.0178776
653	7.61708e-06	5.12286e-06	3.41524e-06	0.0253903
654	1.24185e-05	8.35206e-06	5.56804e-06	0.041395
655	1.12964e-05	7.59737e-06	5.06492e-06	0.0376546
656	2.39722e-05	1.61224e-05	1.07483e-05	0.0799072
657	6.86125e-06	4.61453e-06	3.07635e-06	0.0228708
658	8.2096e-06	5.52136e-06	3.68091e-06	0.0273653
659	1.08213e-05	7.27784e-06	4.85189e-06	0.0360709
660	6.47354e-06	4.35377e-06	2.90252e-06	0.0215785
661	8.08915e-06	5.44035e-06	3.6269e-06	0.0269638
662	1.01625e-05	6.83475e-06	4.5565e-06	0.0338749
663	5.75926e-06	3.87338e-06	2.58225e-06	0.0191975
664	1.04288e-05	7.01385e-06	4.6759e-06	0.0347625
665	1.03792e-05	6.98055e-06	4.6537e-06	0.0345975
666	7.77164e-06	5.22681e-06	3.48454e-06	0.0259055
667	2.6303e-05	1.769e-05	1.17934e-05	0.0876765
668	1.02129e-05	6.8687e-06	4.57913e-06	0.0340431
669	8.67127e-06	5.83185e-06	3.8879e-06	0.0289042
670	1.12169e-05	7.54391e-06	5.02927e-06	0.0373896
671	1.09479e-05	7.36302e-06	4.90868e-06	0.0364931
672	8.16219e-06	5.48947e-06	3.65965e-06	0.0272073
673	4.9278e-06	3.31419e-06	2.20946e-06	0.016426
674	1.13579e-05	7.63877e-06	5.09251e-06	0.0378598
675	1.13205e-05	7.61358e-06	5.07572e-06	0.037735
676	1.24532e-05	8.37537e-06	5.58358e-06	0.0415106
677	7.59511e-06	5.10809e-06	3.40539e-06	0.025317
678	1.51216e-05	1.017e-05	6.78001e-06	0.0504054
679	1.37946e-05	9.27756e-06	6.18504e-06	0.0459821
680	5.02578e-06	3.38009e-06	2.25339e-06	0.0167526
681	3.01585e-05	2.02831e-05	1.35221e-05	0.100528
682	7.67056e-06	5.15883e-06	3.43922e-06	0.0255685
683	2.21205e-05	1.48771e-05	9.91809e-06	0.0737351
684	8.34706e-06	5.61381e-06	3.74254e-06	0.0278235
685	9.28413e-06	6.24403e-06	4.16269e-06	0.0309471
686	1.13988e-05	7.66628e-06	5.11085e-06	0.0379961
687	1.25286e-05	8.42607e-06	5.61738e-06	0.0417618
688	1.78063e-05	1.19756e-05	7.98373e-06	0.0593543
689	1.42193e-05	9.56317e-06	6.37545e-06	0.0473977
690	1.99151e-05	1.33939e-05	8.92924e-06	0.0663836
691	1.1922e-05	8.01816e-06	5.34544e-06	0.0397402
692	1.44396e-05	9.71131e-06	6.47421e-06	0.0481319
693	1.09616e-05	7.3722e-06	4.9148e-06	0.0365386
694	1.0567e-05	7.10682e-06	4.73788e-06	0.0352233
695	2.13178e-05	1.43373e-05	9.55818e-06	0.0710593
696	4.13928e-06	2.78387e-06	1.85591e-06	0.0137976
697	7.48781e-06	5.03592e-06	3.35728e-06	0.0249594
698	9.00456e-06	6.05601e-06	4.03734e-06	0.0300152
699	7.91231e-06	5.32142e-06	3.54761e-06	0.0263744
700	1.20831e-05	8.12645e-06	5.41764e-06	0.0402769
701	1.63805e-05	1.10167e-05	7.34448e-06	0.0546018
702	4.36859e-06	2.93809e-06	1.95873e-06	0.014562
703	1.40509e-05	9.44994e-06	6.29996e-06	0.0468364
704	1.43169e-05	9.62884e-06	6.41923e-06	0.0477231
705	1.68474e-05	1.13307e-05	7.55379e-06	0.0561579
706	9.21469e-06	6.19733e-06	4.13155e-06	0.0307156
707	1.02745e-05	6.91014e-06	4.60676e-06	0.0342485
708	1.24019e-05	8.34088e-06	5.56059e-06	0.0413396
709	7.93488e-06	5.3366e-06	3.55773e-06	0.0264496
710	1.5498e-05	1.04232e-05	6.9488e-06	0.0516602
711	7.82375e-06	5.26186e-06	3.50791e-06	0.0260792
712	1.34793e-05	9.06551e-06	6.04368e-06	0.0449311
713	1.0577e-05	7.11358e-06	4.74239e-06	0.0352568
714	4.25702e-06	2.86306e-06	1.9087e-06	0.0141901
715	6.09428e-06	4.0987e-06	2.73247e-06	0.0203143
716	6.97819e-06	4.69318e-06	3.12879e-06	0.0232606
717	1.41116e-05	9.49074e-06	6.32716e-06	0.0470386
718	2.03313e-05	1.36738e-05	9.11586e-06	0.067771
719	1.06442e-05	7.15872e-06	4.77248e-06	0.0354806
720	7.67225e-06	5.15996e-06	3.43997e-06	0.0255742
721	6.32755e-06	4.25559e-06	2.83706e-06	0.0210918
722	6.58259e-06	4.42712e-06	2.95141e-06	0.021942
723	1.00007e-05	6.72597e-06	4.48398e-06	0.0333357
724	8.86335e-06	5.96104e-06	3.97402e-06	0.0295445
725	1.85548e-05	1.2479e-05	8.31932e-06	0.0618492
726	1.31053e-05	8.81393e-06	5.87595e-06	0.0436842
727	1.21393e-05	8.16427e-06	5.44285e-06	0.0404643
728	9.76507e-06	6.56749e-06	4.37833e-06	0.0325502
729	1.48747e-05	1.0004e-05	6.66932e-06	0.0495824
730	7.28126e-06	4.897e-06	3.26467e-06	0.0242709
731	8.08287e-06	5.43612e-06	3.62408e-06	0.0269429
732	1.39404e-05	9.37558e-06	6.25039e-06	0.0464679
733	6.25338e-06	4.20571e-06	2.8038e-06	0.0208446
734	1.24043e-05	8.34248e-06	5.56165e-06	0.0413476
735	1.16385e-05	7.82747e-06	5.21831e-06	0.038795
736	2.80864e-05	1.88895e-05	1.2593e-05	0.0936213
737	7.96897e-06	5.35952e-06	3.57302e-06	0.0265632
738	5.26031e-06	3.53782e-06	2.35854e-06	0.0175344
739	9.99076e-06	6.71928e-06	4.47952e-06	0.0333025
740	7.47497e-06	5.02729e-06	3.35152e-06	0.0249166
741	1.20041e-05	8.07334e-06	5.38223e-06	0.0400137
742	6.17395e-06	4.15228e-06	2.76819e-06	0.0205798
743	1.6386e-05	1.10204e-05	7.34694e-06	0.0546201
744	8.23624e-06	5.53928e-06	3.69285e-06	0.0274541
745	8.91092e-06	5.99303e-06	3.99535e-06	0.0297031
746	4.54717e-06	3.05819e-06	2.0388e-06	0.0151572
747	1.1443e-05	7.69598e-06	5.13065e-06	0.0381433
748	9.88617e-06	6.64894e-06	4.43262e-06	0.0329539
749	1.43338e-05	9.64016e-06	6.42677e-06	0.0477792
750	1.29613e-05	8.71714e-06	5.81143e-06	0.0432045
751	1.10712e-05	7.44589e-06	4.96393e-06	0.0369038
752	1.45946e-05	9.81561e-06	6.54374e-06	0.0486488
753	1.6273e-05	1.09444e-05	7.29624e-06	0.0542432
754	1.31371e-05	8.83535e-06	5.89023e-06	0.0437904
755	1.02105e-05	6.86703e-06	4.57802e-06	0.0340348
756	8.28197e-06	5.57003e-06	3.71335e-06	0.0276066
757	8.68109e-06	5.83846e-06	3.89231e-06	0.028937
758	1.20062e-05	8.07477e-06	5.38318e-06	0.0400207
759	1.31591e-05	8.85014e-06	5.90009e-06	0.0438636
760	1.51274e-05	1.01739e-05	6.78262e-06	0.0504247
761	1.79705e-05	1.2086e-05	8.05735e-06	0.0599016
762	1.50114e-05	1.00959e-05	6.73061e-06	0.0500381
763	1.15822e-05	7.78956e-06	5.19304e-06	0.0386072
764	1.02838e-05	6.91634e-06	4.6109e-06	0.0342793
765	1.32782e-05	8.93026e-06	5.9535e-06	0.0442607
766	1.26255e-05	8.49124e-06	5.66083e-06	0.0420849
767	7.19491e-06	4.83893e-06	3.22595e-06	0.023983
768	1.5888e-05	1.06855e-05	7.12365e-06	0.0529601
769	1.10713e-05	7.44598e-06	4.96398e-06	0.0369043
770	1.40164e-05	9.42673e-06	6.28449e-06	0.0467214
771	1.21866e-05	8.19607e-06	5.46404e-06	0.0406219
772	1.27804e-05	8.59548e-06	5.73032e-06	0.0426015
773	7.51468e-06	5.05399e-06	3.36933e-06	0.0250489
774	1.5625e-05	1.05086e-05	7.00571e-06	0.0520833
775	2.33039e-05	1.5673e-05	1.04487e-05	0.0776797
776	9.42316e-06	6.33753e-06	4.22502e-06	0.0314105
777	1.3116e-05	8.82112e-06	5.88075e-06	0.0437199
778	1.01518e-05	6.82759e-06	4.55173e-06	0.0338394
779	8.4363e-06	5.67382e-06	3.78255e-06	0.028121
780	4.16359e-06	2.80022e-06	1.86681e-06	0.0138786
781	1.23279e-05	8.29113e-06	5.52742e-06	0.0410931
782	1.21632e-05	8.18034e-06	5.45356e-06	0.040544
783	1.01613e-05	6.83399e-06	4.55599e-06	0.0338711
784	1.92706e-05	1.29604e-05	8.64026e-06	0.0642352
785	5.10596e-06	3.43401e-06	2.28934e-06	0.0170199
786	9.0771e-06	6.1048e-06	4.06986e-06	0.030257
787	9.13555e-06	6.1441e-06	4.09607e-06	0.0304518
788	1.30197e-05	8.7564e-06	5.8376e-06	0.043399
789	2.91973e-05	1.96366e-05	1.30911e-05	0.0973245
790	7.35669e-06	4.94774e-06	3.29849e-06	0.0245223
791	1.26565e-05	8.51213e-06	5.67475e-06	0.0421884
792	1.01552e-05	6.82987e-06	4.55325e-06	0.0338507
793	1.43342e-05	9.64045e-06	6.42696e-06	0.0477806
794	1.48988e-05	1.00202e-05	6.68012e-06	0.0496627
795	5.6107e-06	3.77347e-06	2.51565e-06	0.0187023
796	1.03281e-05	6.94617e-06	4.63078e-06	0.0344271
797	1.18699e-05	7.98306e-06	5.32204e-06	0.0395662
798	1.0973e-05	7.37987e-06	4.91991e-06	0.0365766
799	1.98987e-05	1.33829e-05	8.92192e-06	0.0663292
800	4.79725e-06	3.22639e-06	2.15092e-06	0.0159908
801	1.14963e-05	7.7318e-06	5.15453e-06	0.0383209
802	8.54407e-06	5.7463e-06	3.83087e-06	0.0284802
803	1.92374e-05	1.29381e-05	8.62541e-06	0.0641248
804	1.38358e-05	9.30527e-06	6.20351e-06	0.0461194
805	1.41188e-05	9.49557e-06	6.33038e-06	0.0470626
806	1.20823e-05	8.12595e-06	5.4173e-06	0.0402744
807	9.0666e-06	6.09773e-06	4.06516e-06	0.030222
808	7.98215e-06	5.36838e-06	3.57892e-06	0.0266072
809	9.80084e-06	6.59155e-06	4.39436e-06	0.0326695
810	1.56923e-05	1.05539e-05	7.03591e-06	0.0523078
811	1.6126e-05	1.08455e-05	7.23036e-06	0.0537534
812	1.1292e-05	7.59439e-06	5.06293e-06	0.0376399
813	6.76617e-06	4.55058e-06	3.03372e-06	0.0225539
814	1.07041e-05	7.19906e-06	4.79937e-06	0.0356805
815	1.02976e-05	6.92564e-06	4.61709e-06	0.0343253
816	8.02182e-06	5.39507e-06	3.59671e-06	0.0267394
817	7.30792e-06	4.91494e-06	3.27662e-06	0.0243597
818	1.21548e-05	8.17471e-06	5.44981e-06	0.0405161
819	1.53751e-05	1.03405e-05	6.89368e-06	0.0512504
820	7.15335e-06	4.81098e-06	3.20732e-06	0.0238445
821	7.62334e-06	5.12707e-06	3.41805e-06	0.0254111
822	8.44274e-06	5.67816e-06	3.78544e-06	0.0281425
823	1.32313e-05	8.89867e-06	5.93244e-06	0.0441042
824	1.70199e-05	1.14467e-05	7.63113e-06	0.0567329
825	4.46251e-06	3.00126e-06	2.00084e-06	0.014875
826	1.37768e-05	9.26556e-06	6.17704e-06	0.0459226
827	1.43884e-05	9.67689e-06	6.45126e-06	0.0479613
828	6.7461e-06	4.53708e-06	3.02472e-06	0.022487
829	9.74784e-06	6.5559e-06	4.3706e-06	0.0324928
830	1.02026e-05	6.86173e-06	4.57449e-06	0.0340086
831	1.0016e-05	6.73622e-06	4.49081e-06	0.0333865
832	1.14045e-05	7.67011e-06	5.11341e-06	0.0380151
833	1.3632e-05	9.16819e-06	6.11212e-06	0.04544
834	5.57447e-06	3.7491e-06	2.4994e-06	0.0185816
835	1.07216e-05	7.21083e-06	4.80722e-06	0.0357388
836	1.20558e-05	8.1081e-06	5.4054e-06	0.0401859
837	2.51589e-05	1.69206e-05	1.12804e-05	0.083863
838	3.51828e-06	2.36622e-06	1.57748e-06	0.0117276
839	1.23408e-05	8.29978e-06	5.53319e-06	0.041136
840	8.57549e-06	5.76744e-06	3.84496e-06	0.028585
841	1.24256e-05	8.35685e-06	5.57123e-06	0.0414188
842	1.08972e-05	7.32893e-06	4.88595e-06	0.0363241
843	1.01086e-05	6.79854e-06	4.53236e-06	0.0336954
844	1.6179e-05	1.08812e-05	7.25411e-06	0.05393
845	6.05084e-06	4.06949e-06	2.71299e-06	0.0201695
846	1.05731e-05	7.11096e-06	4.74064e-06	0.0352438
847	1.00646e-05	6.76895e-06	4.51263e-06	0.0335487
848	4.8201e-06	3.24175e-06	2.16117e-06	0.016067
849	2.92815e-06	1.96932e-06	1.31288e-06	0.0097605
850	1.2223e-05	8.22056e-06	5.48037e-06	0.0407433
851	1.63104e-05	1.09695e-05	7.31301e-06	0.0543679
852	9.17995e-06	6.17396e-06	4.11598e-06	0.0305998
853	7.50405e-06	5.04684e-06	3.36456e-06	0.0250135
854	5.02229e-06	3.37774e-06	2.25183e-06	0.016741
855	1.82006e-05	1.22408e-05	8.16054e-06	0.0606688
856	9.61491e-06	6.4665e-06	4.311e-06	0.0320497
857	1.17241e-05	7.88504e-06	5.25669e-06	0.0390804
858	8.97105e-06	6.03347e-06	4.02231e-06	0.0299035
859	2.01835e-05	1.35744e-05	9.04961e-06	0.0672784
860	8.29374e-06	5.57795e-06	3.71863e-06	0.0276458
861	1.24684e-05	8.3856e-06	5.5904e-06	0.0415613
862	9.72713e-06	6.54197e-06	4.36131e-06	0.0324238
863	1.34548e-05	9.04899e-06	6.03266e-06	0.0448492
864	1.78846e-05	1.20283e-05	8.01886e-06	0.0596154
865	6.61336e-06	4.44781e-06	2.9652e-06	0.0220445
866	1.37192e-05	9.22686e-06	6.15124e-06	0.0457308
867	1.19135e-05	8.0124e-06	5.3416e-06	0.0397116
868	1.12858e-05	7.59025e-06	5.06016e-06	0.0376193
869	1.40164e-05	9.42669e-06	6.28446e-06	0.0467212
870	1.37831e-05	9.2698e-06	6.17987e-06	0.0459436
871	1.60917e-05	1.08224e-05	7.21496e-06	0.0536389
872	9.41791e-06	6.33401e-06	4.22267e-06	0.031393
873	1.10767e-05	7.4496e-06	4.9664e-06	0.0369222
874	4.47596e-06	3.0103e-06	2.00687e-06	0.0149199
875	9.33685e-06	6.27949e-06	4.18633e-06	0.0311228
876	2.06023e-05	1.38561e-05	9.23738e-06	0.0686744
877	1.29397e-05	8.70259e-06	5.80173e-06	0.0431324
878	8.41683e-06	5.66073e-06	3.77382e-06	0.0280561
879	1.1891e-05	7.99726e-06	5.33151e-06	0.0396366
880	7.40024e-06	4.97702e-06	3.31802e-06	0.0246675
881	1.16018e-05	7.80279e-06	5.20186e-06	0.0386727
882	7.95639e-06	5.35106e-06	3.56737e-06	0.0265213
883	6.97802e-06	4.69306e-06	3.12871e-06	0.0232601
884	9.18678e-06	6.17856e-06	4.11904e-06	0.0306226
885	1.25556e-05	8.44426e-06	5.6295e-06	0.041852
886	1.33198e-05	8.95823e-06	5.97216e-06	0.0443994
887	1.81793e-05	1.22265e-05	8.15099e-06	0.0605978
888	5.78558e-06	3.89109e-06	2.59406e-06	0.0192853
889	4.7425e-06	3.18956e-06	2.12638e-06	0.0158083
890	1.05589e-05	7.10141e-06	4.73427e-06	0.0351965
891	1.33839e-05	9.00133e-06	6.00089e-06	0.044613
892	6.73627e-06	4.53048e-06	3.02032e-06	0.0224542
893	1.59124e-05	1.07019e-05	7.13458e-06	0.0530413
894	1.74171e-05	1.17139e-05	7.80924e-06	0.0580571
895	8.20492e-06	5.51821e-06	3.67881e-06	0.0273497
896	8.90306e-06	5.98774e-06	3.99183e-06	0.0296769
897	2.08985e-05	1.40553e-05	9.3702e-06	0.0696618
898	7.47375e-06	5.02647e-06	3.35098e-06	0.0249125
899	1.41979e-05	9.54878e-06	6.36586e-06	0.0473263
900	1.52003e-05	1.0223e-05	6.81532e-06	0.0506678
901	2.257e-05	1.51794e-05	1.01196e-05	0.0752334
902	1.77951e-05	1.19681e-05	7.97871e-06	0.059317
903	1.39521e-05	9.38345e-06	6.25564e-06	0.0465069
904	1.57501e-05	1.05927e-05	7.06183e-06	0.0525005
905	9.23854e-06	6.21337e-06	4.14225e-06	0.0307951
906	2.19249e-05	1.47456e-05	9.83038e-06	0.073083
907	1.16254e-05	7.81867e-06	5.21244e-06	0.0387514
908	9.98566e-06	6.71585e-06	4.47723e-06	0.0332855
909	7.56273e-06	5.08631e-06	3.39087e-06	0.0252091
910	1.96242e-05	1.31983e-05	8.79884e-06	0.0654141
911	7.69411e-06	5.17467e-06	3.44978e-06	0.025647
912	8.76152e-06	5.89255e-06	3.92837e-06	0.0292051
913	7.30024e-06	4.90977e-06	3.27318e-06	0.0243341
914	1.42009e-05	9.55081e-06	6.36721e-06	0.0473364
915	5.73766e-06	3.85886e-06	2.57257e-06	0.0191255
916	1.23536e-05	8.30837e-06	5.53891e-06	0.0411785
917	3.79683e-06	2.55355e-06	1.70237e-06	0.0126561
918	9.49912e-06	6.38863e-06	4.25908e-06	0.0316637
919	1.17536e-05	7.90487e-06	5.26992e-06	0.0391787
920	5.92854e-06	3.98724e-06	2.65816e-06	0.0197618
921	9.7086e-06	6.52951e-06	4.35301e-06	0.032362
922	1.07177e-05	7.20819e-06	4.80546e-06	0.0357257
923	1.34982e-05	9.07819e-06	6.05212e-06	0.0449939
924	1.30548e-05	8.77998e-06	5.85332e-06	0.043516
925	1.53045e-05	1.0293e-05	6.86203e-06	0.0510151
926	9.60573e-06	6.46032e-06	4.30688e-06	0.0320191
927	1.84023e-05	1.23765e-05	8.25098e-06	0.0613411
928	1.75547e-05	1.18064e-05	7.87093e-06	0.0585156
929	1.14682e-05	7.71291e-06	5.14194e-06	0.0382273
930	1.12916e-05	7.59415e-06	5.06276e-06	0.0376386
931	4.89113e-06	3.28952e-06	2.19302e-06	0.0163038
932	1.17537e-05	7.90497e-06	5.26998e-06	0.0391791
933	7.30844e-06	4.91528e-06	3.27686e-06	0.0243615
934	5.88211e-06	3.95601e-06	2.63734e-06	0.019607
935	1.23281e-05	8.29124e-06	5.52749e-06	0.0410936
936	1.13685e-05	7.64588e-06	5.09726e-06	0.0378951
937	7.83741e-06	5.27104e-06	3.51403e-06	0.0261247
938	9.51697e-06	6.40063e-06	4.26708e-06	0.0317232
939	1.03431e-05	6.95625e-06	4.6375e-06	0.034477
940	1.47363e-05	9.9109e-06	6.60727e-06	0.0491211
941	5.3906e-06	3.62544e-06	2.41696e-06	0.0179687
942	8.2474e-06	5.54678e-06	3.69785e-06	0.0274913
943	1.53542e-05	1.03264e-05	6.8843e-06	0.0511806
944	1.21643e-05	8.1811e-06	5.45406e-06	0.0405477
945	1.28416e-05	8.63661e-06	5.75774e-06	0.0428053
946	9.32831e-06	6.27375e-06	4.1825e-06	0.0310944
947	6.06755e-06	4.08072e-06	2.72048e-06	0.0202252
948	1.22685e-05	8.25119e-06	5.50079e-06	0.0408951
949	1.52651e-05	1.02666e-05	6.84437e-06	0.0508838
950	7.25709e-06	4.88075e-06	3.25383e-06	0.0241903
951	1.02832e-05	6.91598e-06	4.61065e-06	0.0342775
952	7.34254e-06	4.93822e-06	3.29215e-06	0.0244751
953	1.58386e-05	1.06523e-05	7.1015e-06	0.0527954
954	6.67157e-06	4.48696e-06	2.9913e-06	0.0222386
955	1.11511e-05	7.49965e-06	4.99977e-06	0.0371703
956	7.3953e-06	4.9737e-06	3.3158e-06	0.024651
957	7.7497e-06	5.21205e-06	3.4747e-06	0.0258323
958	1.03458e-05	6.95804e-06	4.6387e-06	0.0344859
959	1.04247e-05	7.01115e-06	4.6741e-06	0.0347492
960	8.67488e-06	5.83428e-06	3.88952e-06	0.0289163
961	1.20468e-05	8.10204e-06	5.40136e-06	0.0401559
962	1.33474e-05	8.97681e-06	5.98454e-06	0.0444915
963	1.26518e-05	8.50897e-06	5.67265e-06	0.0421727
964	1.5644e-05	1.05213e-05	7.01423e-06	0.0521466
965	1.45759e-05	9.80301e-06	6.53534e-06	0.0485864
966	8.60254e-06	5.78563e-06	3.85709e-06	0.0286751
967	6.78305e-06	4.56193e-06	3.04129e-06	0.0226102
968	2.16983e-05	1.45932e-05	9.72877e-06	0.0723276
969	5.39897e-06	3.63107e-06	2.42072e-06	0.0179966
970	5.64413e-06	3.79595e-06	2.53063e-06	0.0188138
971	9.06654e-06	6.09769e-06	4.06513e-06	0.0302218
972	7.70197e-06	5.17996e-06	3.4533e-06	0.0256732
973	4.18167e-06	2.81238e-06	1.87492e-06	0.0139389
974	8.20101e-06	5.51558e-06	3.67705e-06	0.0273367
975	6.06513e-06	4.0791e-06	2.7194e-06	0.0202171
976	1.72045e-05	1.15709e-05	7.71393e-06	0.0573484
977	4.70955e-06	3.1674e-06	2.1116e-06	0.0156985
978	1.09555e-05	7.3681e-06	4.91207e-06	0.0365183
979	7.14243e-06	4.80363e-06	3.20242e-06	0.0238081
980	1.54528e-05	1.03928e-05	6.92852e-06	0.0515094
981	2.10133e-05	1.41325e-05	9.42167e-06	0.0700445
982	8.30886e-06	5.58812e-06	3.72541e-06	0.0276962
983	1.1154e-05	7.50165e-06	5.0011e-06	0.0371802
984	1.05865e-05	7.11996e-06	4.74664e-06	0.0352885
985	1.03358e-05	6.95132e-06	4.63421e-06	0.0344526
986	1.23553e-05	8.30955e-06	5.5397e-06	0.0411844
987	1.03812e-05	6.98187e-06	4.65458e-06	0.034604
988	1.16307e-05	7.82222e-06	5.21481e-06	0.038769
989	9.06373e-06	6.0958e-06	4.06387e-06	0.0302124
990	9.19454e-06	6.18378e-06	4.12252e-06	0.0306485
991	2.00602e-05	1.34914e-05	8.9943e-06	0.0668672
992	9.48751e-06	6.38082e-06	4.25388e-06	0.031625
993	1.50631e-05	1.01307e-05	6.75379e-06	0.0502104
994	8.58893e-06	5.77648e-06	3.85098e-06	0.0286298
995	1.12943e-05	7.59595e-06	5.06396e-06	0.0376475
996	1.12203e-05	7.54621e-06	5.03081e-06	0.0374011
997	1.10732e-05	7.4473e-06	4.96486e-06	0.0369108
998	8.01515e-06	5.39058e-06	3.59372e-06	0.0267172
999	1.25405e-05	8.43409e-06	5.62272e-06	0.0418016
1000	8.51815e-06	5.72887e-06	3.81925e-06	0.0283938
1001	1.53027e-05	1.02918e-05	6.86121e-06	0.051009
1002	7.3674e-06	4.95494e-06	3.30329e-06	0.024558
1003	5.15974e-06	3.47018e-06	2.31345e-06	0.0171991
1004	1.85247e-05	1.24587e-05	8.30583e-06	0.0617489
1005	7.24362e-06	4.87169e-06	3.24779e-06	0.0241454
1006	1.67918e-05	1.12933e-05	7.52886e-06	0.0559726
1007	1.144e-05	7.69396e-06	5.12931e-06	0.0381333
1008	1.54067e-05	1.03617e-05	6.90782e-06	0.0513555
1009	1.51971e-05	1.02208e-05	6.81386e-06	0.050657
1010	1.90632e-05	1.28209e-05	8.54728e-06	0.063544
1011	3.79511e-05	2.5524e-05	1.7016e-05	0.126504
1012	2.34002e-05	1.57378e-05	1.04918e-05	0.0780006
1013	7.28586e-06	4.9001e-06	3.26673e-06	0.0242862
1014	1.31385e-05	8.83627e-06	5.89084e-06	0.0437949
1015	1.17165e-05	7.87993e-06	5.25329e-06	0.039055
1016	1.00822e-05	6.78076e-06	4.52051e-06	0.0336073
1017	6.15427e-06	4.13905e-06	2.75936e-06	0.0205142
1018	5.80796e-06	3.90613e-06	2.60409e-06	0.0193599
1019	2.01363e-05	1.35426e-05	9.02841e-06	0.0671208
1020	1.34524e-05	9.0474e-06	6.0316e-06	0.0448413
1021	8.65241e-06	5.81917e-06	3.87944e-06	0.0288414
1022	7.95275e-06	5.34862e-06	3.56574e-06	0.0265092
1023	1.4946e-05	1.00519e-05	6.70128e-06	0.04982
1024	1.34484e-05	9.0447e-06	6.0298e-06	0.0448279
1025	1.00537e-05	6.76159e-06	4.50773e-06	0.0335123
1026	8.62844e-06	5.80305e-06	3.8687e-06	0.0287615
1027	4.55084e-06	3.06066e-06	2.04044e-06	0.0151695
1028	1.63534e-05	1.09985e-05	7.33233e-06	0.0545115
1029	1.19271e-05	8.02158e-06	5.34772e-06	0.0397571
1030	7.75865e-06	5.21807e-06	3.47872e-06	0.0258622
1031	9.59512e-06	6.45319e-06	4.30213e-06	0.0319837
1032	7.91453e-06	5.32291e-06	3.5486e-06	0.0263818
1033	2.11639e-05	1.42338e-05	9.48919e-06	0.0705465
1034	9.82351e-06	6.60679e-06	4.40453e-06	0.032745
1035	1.10649e-05	7.4417e-06	4.96114e-06	0.0368831
1036	6.95164e-06	4.67532e-06	3.11688e-06	0.0231721
1037	4.71993e-06	3.17438e-06	2.11625e-06	0.0157331
1038	1.36884e-05	9.20609e-06	6.13739e-06	0.0456279
1039	1.00253e-05	6.74252e-06	4.49501e-06	0.0334177
1040	1.47807e-05	9.94073e-06	6.62715e-06	0.0492689
1041	1.01027e-05	6.79453e-06	4.52969e-06	0.0336755
1042	1.31449e-05	8.8406e-06	5.89373e-06	0.0438164
1043	9.50218e-06	6.39069e-06	4.26046e-06	0.0316739
1044	1.63677e-05	1.10081e-05	7.3387e-06	0.0545588
1045	1.00888e-05	6.78523e-06	4.52348e-06	0.0336294
1046	1.29111e-05	8.68333e-06	5.78888e-06	0.0430369
1047	1.30632e-05	8.78562e-06	5.85708e-06	0.0435439
1048	1.42377e-05	9.57558e-06	6.38372e-06	0.0474591
1049	9.34955e-06	6.28803e-06	4.19202e-06	0.0311652
1050	1.30581e-05	8.78219e-06	5.85479e-06	0.0435269
1051	2.09758e-05	1.41073e-05	9.40485e-06	0.0699194
1052	7.92536e-06	5.33019e-06	3.55346e-06	0.0264179
1053	1.12442e-05	7.56225e-06	5.0415e-06	0.0374806
1054	1.57757e-05	1.06099e-05	7.07328e-06	0.0525856
1055	9.23842e-06	6.21329e-06	4.14219e-06	0.0307947
1056	1.59253e-05	1.07106e-05	7.14038e-06	0.0530844
1057	1.19734e-05	8.05272e-06	5.36848e-06	0.0399114
1058	1.18031e-05	7.93818e-06	5.29212e-06	0.0393438
1059	8.32271e-06	5.59743e-06	3.73162e-06	0.0277424
1060	1.16537e-05	7.83766e-06	5.22511e-06	0.0388456
1061	1.08442e-05	7.29325e-06	4.86216e-06	0.0361473
1062	1.35492e-05	9.11248e-06	6.07499e-06	0.0451639
1063	2.60481e-05	1.75186e-05	1.16791e-05	0.086827
1064	9.33988e-06	6.28153e-06	4.18769e-06	0.0311329
1065	1.02106e-05	6.86712e-06	4.57808e-06	0.0340353
1066	8.6658e-06	5.82817e-06	3.88545e-06	0.028886
1067	8.0051e-06	5.38382e-06	3.58921e-06	0.0266837
1068	1.72958e-05	1.16323e-05	7.75486e-06	0.0576528
1069	1.15391e-05	7.76059e-06	5.17372e-06	0.0384635
1070	1.83523e-05	1.23428e-05	8.22853e-06	0.0611742
1071	8.90918e-06	5.99186e-06	3.99457e-06	0.0296973
1072	1.01048e-05	6.79595e-06	4.53063e-06	0.0336826
1073	9.43011e-06	6.34221e-06	4.22814e-06	0.0314337
1074	1.20377e-05	8.09595e-06	5.3973e-06	0.0401257
1075	7.61699e-06	5.1228e-06	3.4152e-06	0.02539
1076	1.30775e-05	8.79526e-06	5.86351e-06	0.0435917
1077	9.35184e-06	6.28957e-06	4.19305e-06	0.0311728
1078	9.83536e-06	6.61476e-06	4.40984e-06	0.0327845
1079	1.6624e-05	1.11804e-05	7.45362e-06	0.0554132
1080	6.31198e-06	4.24512e-06	2.83008e-06	0.0210399
1081	1.45372e-05	9.77699e-06	6.51799e-06	0.0484574
1082	1.3314e-05	8.9543e-06	5.96953e-06	0.0443799
1083	5.78844e-06	3.89301e-06	2.59534e-06	0.0192948
1084	1.39279e-05	9.36723e-06	6.24482e-06	0.0464265
1085	5.3092e-06	3.57069e-06	2.38046e-06	0.0176973
1086	1.35603e-05	9.11997e-06	6.07998e-06	0.045201
1087	2.04096e-05	1.37265e-05	9.15099e-06	0.0680321
1088	1.51761e-05	1.02067e-05	6.80445e-06	0.050587
1089	1.43248e-05	9.63413e-06	6.42275e-06	0.0477493
1090	9.42192e-06	6.3367e-06	4.22447e-06	0.0314064
1091	1.66804e-05	1.12184e-05	7.47893e-06	0.0556013
1092	1.14495e-05	7.70034e-06	5.13356e-06	0.0381649
1093	1.55793e-05	1.04779e-05	6.98525e-06	0.0519311
1094	8.37384e-06	5.63182e-06	3.75454e-06	0.0279128
1095	1.46411e-05	9.84685e-06	6.56456e-06	0.0488036
1096	8.55465e-06	5.75342e-06	3.83561e-06	0.0285155
1097	1.06952e-05	7.19305e-06	4.79537e-06	0.0356507
1098	2.03924e-05	1.37149e-05	9.14326e-06	0.0679746
1099	1.31269e-05	8.82846e-06	5.88564e-06	0.0437562
1100	1.44462e-05	9.71579e-06	6.4772e-06	0.0481541
1101	1.15877e-05	7.79329e-06	5.19553e-06	0.0386256
1102	1.23609e-05	8.31329e-06	5.5422e-06	0.0412029
1103	6.89194e-06	4.63517e-06	3.09011e-06	0.0229731
1104	1.64889e-05	1.10896e-05	7.39308e-06	0.0549631
1105	1.12943e-05	7.59596e-06	5.06397e-06	0.0376476
1106	1.02888e-05	6.9197e-06	4.61313e-06	0.0342959
1107	5.40998e-06	3.63848e-06	2.42565e-06	0.0180333
1108	1.2175e-05	8.18827e-06	5.45885e-06	0.0405833
1109	1.76158e-05	1.18475e-05	7.89834e-06	0.0587194
1110	7.70104e-06	5.17933e-06	3.45288e-06	0.0256701
1111	5.37539e-06	3.61521e-06	2.41014e-06	0.017918
1112	6.58672e-06	4.4299e-06	2.95326e-06	0.0219557
1113	1.02576e-05	6.89873e-06	4.59915e-06	0.0341919
1114	7.47626e-06	5.02815e-06	3.3521e-06	0.0249209
1115	1.67748e-05	1.12819e-05	7.52125e-06	0.055916
1116	1.41414e-05	9.51076e-06	6.34051e-06	0.0471379
1117	2.02753e-05	1.36361e-05	9.09076e-06	0.0675843
1118	8.63698e-06	5.80879e-06	3.87253e-06	0.0287899
1119	1.68038e-05	1.13014e-05	7.53425e-06	0.0560126
1120	2.01604e-05	1.35589e-05	9.03924e-06	0.0672014
1121	1.88745e-05	1.2694e-05	8.46269e-06	0.062915
1122	1.6948e-05	1.13984e-05	7.59891e-06	0.0564933
1123	1.16066e-05	7.806e-06	5.204e-06	0.0386886
1124	8.91959e-06	5.99886e-06	3.99924e-06	0.029732
1125	7.3474e-06	4.94149e-06	3.29433e-06	0.0244913
1126	1.46797e-05	9.87285e-06	6.5819e-06	0.0489325
1127	1.11732e-05	7.51451e-06	5.00968e-06	0.0372439
1128	5.65851e-06	3.80562e-06	2.53708e-06	0.0188617
1129	1.13341e-05	7.62274e-06	5.08183e-06	0.0377803
1130	8.12273e-06	5.46294e-06	3.64196e-06	0.0270758
1131	4.09067e-06	2.75118e-06	1.83412e-06	0.0136356
1132	9.16973e-06	6.16709e-06	4.11139e-06	0.0305658
1133	9.4912e-06	6.3833e-06	4.25553e-06	0.0316373
1134	1.41847e-05	9.53993e-06	6.35995e-06	0.0472825
1135	9.18569e-06	6.17783e-06	4.11855e-06	0.030619
1136	7.74198e-06	5.20686e-06	3.47124e-06	0.0258066
1137	1.62281e-05	1.09142e-05	7.27613e-06	0.0540937
1138	3.01559e-06	2.02813e-06	1.35209e-06	0.010052
1139	9.8666e-06	6.63577e-06	4.42385e-06	0.0328887
1140	1.67332e-05	1.12539e-05	7.50259e-06	0.0557773
1141	1.18103e-05	7.94302e-06	5.29534e-06	0.0393677
1142	2.69579e-05	1.81305e-05	1.2087e-05	0.0898598
1143	1.31249e-05	8.82715e-06	5.88477e-06	0.0437497
1144	6.14789e-06	4.13476e-06	2.75651e-06	0.020493
1145	1.1428e-05	7.68588e-06	5.12392e-06	0.0380933
1146	7.84325e-06	5.27497e-06	3.51665e-06	0.0261442
1147	1.03762e-05	6.97849e-06	4.65233e-06	0.0345873
1148	8.67984e-06	5.83762e-06	3.89175e-06	0.0289328
1149	1.41154e-05	9.49331e-06	6.32887e-06	0.0470514
1150	8.23915e-06	5.54123e-06	3.69415e-06	0.0274638
1151	7.26699e-06	4.88741e-06	3.25827e-06	0.0242233
1152	5.92967e-06	3.98799e-06	2.65866e-06	0.0197656
1153	1.43412e-05	9.64517e-06	6.43012e-06	0.0478041
1154	1.33055e-05	8.9486e-06	5.96574e-06	0.0443517
1155	8.38005e-06	5.63599e-06	3.75733e-06	0.0279335
1156	7.09917e-06	4.77454e-06	3.18303e-06	0.0236639
1157	7.24747e-06	4.87428e-06	3.24952e-06	0.0241582
1158	6.52184e-06	4.38625e-06	2.92417e-06	0.0217395
1159	1.44868e-05	9.74311e-06	6.49541e-06	0.0482895
1160	1.10945e-05	7.46159e-06	4.97439e-06	0.0369816
1161	1.3283e-05	8.93346e-06	5.95564e-06	0.0442766
1162	7.68018e-06	5.1653e-06	3.44353e-06	0.0256006
1163	8.8827e-06	5.97405e-06	3.9827e-06	0.029609
1164	1.24777e-05	8.39185e-06	5.59457e-06	0.0415922
1165	2.79178e-06	1.87761e-06	1.25174e-06	0.00930593
1166	1.013e-05	6.81294e-06	4.54196e-06	0.0337667
1167	1.59102e-05	1.07004e-05	7.1336e-06	0.0530341
1168	8.4373e-06	5.6745e-06	3.783e-06	0.0281243
1169	1.40306e-05	9.43627e-06	6.29085e-06	0.0467687
1170	1.27158e-05	8.55197e-06	5.70132e-06	0.0423859
1171	1.55467e-05	1.04559e-05	6.9706e-06	0.0518222
1172	1.20475e-05	8.10253e-06	5.40169e-06	0.0401583
1173	2.9596e-05	1.99048e-05	1.32698e-05	0.0986534
1174	2.21157e-05	1.48739e-05	9.91591e-06	0.0737189
1175	1.00596e-05	6.76556e-06	4.51037e-06	0.0335319
1176	1.03461e-05	6.95827e-06	4.63884e-06	0.034487
1177	2.61295e-05	1.75734e-05	1.17156e-05	0.0870984
1178	1.14897e-05	7.72739e-06	5.15159e-06	0.038299
1179	8.49293e-06	5.71191e-06	3.80794e-06	0.0283098
1180	1.74266e-05	1.17203e-05	7.81351e-06	0.0580888
1181	1.01061e-05	6.79685e-06	4.53124e-06	0.033687
1182	7.82577e-06	5.26321e-06	3.50881e-06	0.0260859
1183	9.45219e-06	6.35706e-06	4.23804e-06	0.0315073
1184	1.26899e-05	8.5346e-06	5.68973e-06	0.0422998
1185	1.15108e-05	7.74155e-06	5.16103e-06	0.0383692
1186	1.35351e-05	9.10303e-06	6.06868e-06	0.045117
1187	6.48863e-06	4.36392e-06	2.90928e-06	0.0216288
1188	9.24103e-06	6.21505e-06	4.14336e-06	0.0308034
1189	1.29553e-05	8.71309e-06	5.80872e-06	0.0431844
1190	1.07069e-05	7.20095e-06	4.80063e-06	0.0356898
1191	8.20233e-06	5.51647e-06	3.67765e-06	0.0273411
1192	3.84328e-06	2.5848e-06	1.7232e-06	0.0128109
1193	2.53749e-05	1.70659e-05	1.13772e-05	0.084583
1194	8.23819e-06	5.54059e-06	3.69372e-06	0.0274606
1195	1.77004e-05	1.19044e-05	7.93624e-06	0.0590012
1196	9.43817e-06	6.34763e-06	4.23176e-06	0.0314606
1197	1.0606e-05	7.13309e-06	4.75539e-06	0.0353535
1198	1.7693e-05	1.18994e-05	7.93295e-06	0.0589768
1199	1.42859e-05	9.60794e-06	6.40529e-06	0.0476195
1200	1.95591e-05	1.31545e-05	8.76965e-06	0.0651971
1201	1.38361e-05	9.30547e-06	6.20365e-06	0.0461204
1202	9.18403e-06	6.17671e-06	4.11781e-06	0.0306134
1203	9.75257e-06	6.55908e-06	4.37272e-06	0.0325086
1204	1.26085e-05	8.4798e-06	5.6532e-06	0.0420282
1205	1.18798e-05	7.98975e-06	5.3265e-06	0.0395994
1206	1.09142e-05	7.34032e-06	4.89355e-06	0.0363806
1207	5.82429e-06	3.91712e-06	2.61141e-06	0.0194143
1208	9.89245e-06	6.65316e-06	4.43544e-06	0.0329748
1209	1.21057e-05	8.14168e-06	5.42779e-06	0.0403523
1210	8.57599e-06	5.76777e-06	3.84518e-06	0.0285866
1211	9.48282e-06	6.37766e-06	4.25177e-06	0.0316094
1212	1.00014e-05	6.72642e-06	4.48428e-06	0.0333379
1213	2.064e-05	1.38814e-05	9.25427e-06	0.0688
1214	9.2306e-06	6.20803e-06	4.13869e-06	0.0307687
1215	1.0982e-05	7.38594e-06	4.92396e-06	0.0366067
1216	1.08513e-05	7.29802e-06	4.86535e-06	0.0361709
1217	7.90191e-06	5.31442e-06	3.54295e-06	0.0263397
1218	7.63752e-06	5.13661e-06	3.42441e-06	0.0254584
1219	8.87521e-06	5.96901e-06	3.97934e-06	0.029584
1220	6.70495e-06	4.50941e-06	3.00627e-06	0.0223498
1221	1.53486e-05	1.03227e-05	6.88181e-06	0.0511622
1222	7.78363e-06	5.23487e-06	3.48992e-06	0.0259454
1223	1.3363e-05	8.9873e-06	5.99153e-06	0.0445434
1224	7.17766e-06	4.82733e-06	3.21822e-06	0.0239255
1225	1.38623e-05	9.32305e-06	6.21537e-06	0.0462075
1226	1.40659e-05	9.46001e-06	6.30667e-06	0.0468863
1227	1.03161e-05	6.93808e-06	4.62539e-06	0.034387
1228	4.74645e-06	3.19222e-06	2.12815e-06	0.0158215
1229	1.52555e-05	1.02601e-05	6.84006e-06	0.0508517
1230	1.34194e-05	9.02518e-06	6.01679e-06	0.0447312
1231	1.0871e-05	7.31128e-06	4.87419e-06	0.0362367
1232	7.27055e-06	4.8898e-06	3.25987e-06	0.0242352
1233	1.48991e-05	1.00204e-05	6.68024e-06	0.0496636
1234	5.92341e-06	3.98378e-06	2.65585e-06	0.0197447
1235	8.75814e-06	5.89028e-06	3.92685e-06	0.0291938
1236	1.00631e-05	6.76795e-06	4.51197e-06	0.0335438
1237	9.86241e-06	6.63295e-06	4.42197e-06	0.0328747
1238	3.10219e-06	2.08638e-06	1.39092e-06	0.0103406
1239	9.70349e-06	6.52607e-06	4.35072e-06	0.032345
1240	1.0621e-05	7.14315e-06	4.7621e-06	0.0354033
1241	9.63158e-06	6.47771e-06	4.31847e-06	0.0321053
1242	1.47097e-05	9.89303e-06	6.59535e-06	0.0490325
1243	7.36446e-06	4.95296e-06	3.30197e-06	0.0245482
1244	1.07462e-05	7.22732e-06	4.81821e-06	0.0358205
1245	8.46567e-06	5.69358e-06	3.79572e-06	0.0282189
1246	6.62013e-06	4.45237e-06	2.96824e-06	0.0220671
1247	9.37209e-06	6.30319e-06	4.20213e-06	0.0312403
1248	1.44606e-05	9.72544e-06	6.48363e-06	0.0482019
1249	7.89579e-06	5.31031e-06	3.54021e-06	0.0263193
1250	1.22156e-05	8.21558e-06	5.47706e-06	0.0407186
1251	8.63803e-06	5.8095e-06	3.873e-06	0.0287934
1252	1.16198e-05	7.81492e-06	5.20994e-06	0.0387328
1253	1.08425e-05	7.29209e-06	4.86139e-06	0.0361415
1254	1.15645e-05	7.77768e-06	5.18512e-06	0.0385483
1255	1.47138e-05	9.89574e-06	6.59716e-06	0.0490459
1256	7.81868e-06	5.25845e-06	3.50563e-06	0.0260623
1257	1.45422e-05	9.78036e-06	6.52024e-06	0.0484741
1258	4.6795e-06	3.14719e-06	2.09813e-06	0.0155983
1259	9.47424e-06	6.37189e-06	4.24793e-06	0.0315808
1260	6.44276e-06	4.33307e-06	2.88871e-06	0.0214759
1261	9.30331e-06	6.25693e-06	4.17129e-06	0.031011
1262	9.22398e-06	6.20358e-06	4.13572e-06	0.0307466
1263	1.2591e-05	8.46807e-06	5.64538e-06	0.04197
1264	5.91187e-06	3.97603e-06	2.65068e-06	0.0197062
1265	1.20374e-05	8.09576e-06	5.39718e-06	0.0401248
1266	7.7133e-06	5.18757e-06	3.45838e-06	0.025711
1267	6.69297e-06	4.50135e-06	3.0009e-06	0.0223099
1268	6.41051e-06	4.31138e-06	2.87425e-06	0.0213684
1269	1.00077e-05	6.73066e-06	4.48711e-06	0.0333589
1270	7.94714e-06	5.34484e-06	3.56323e-06	0.0264905
1271	1.37768e-05	9.26554e-06	6.17703e-06	0.0459225
1272	1.17877e-05	7.9278e-06	5.2852e-06	0.0392923
1273	1.01833e-05	6.84876e-06	4.56584e-06	0.0339443
1274	1.04828e-05	7.05016e-06	4.70011e-06	0.0349425
1275	1.41104e-05	9.48994e-06	6.32663e-06	0.0470347
1276	9.50258e-06	6.39095e-06	4.26063e-06	0.0316753
1277	1.18014e-05	7.93703e-06	5.29136e-06	0.0393381
1278	1.32941e-05	8.94094e-06	5.96063e-06	0.0443137
1279	8.09387e-06	5.44353e-06	3.62902e-06	0.0269796
1280	8.06376e-06	5.42328e-06	3.61552e-06	0.0268792
1281	1.37425e-05	9.24249e-06	6.16166e-06	0.0458083
1282	1.95026e-05	1.31164e-05	8.74428e-06	0.0650085
1283	1.08673e-05	7.30878e-06	4.87252e-06	0.0362243
1284	1.36707e-05	9.19423e-06	6.12949e-06	0.0455691
1285	1.31328e-05	8.83243e-06	5.88828e-06	0.0437759
1286	3.70836e-06	2.49405e-06	1.6627e-06	0.0123612
1287	1.69292e-05	1.13857e-05	7.59048e-06	0.0564307
1288	9.98092e-06	6.71266e-06	4.47511e-06	0.0332697
1289	7.8588e-06	5.28543e-06	3.52362e-06	0.026196
1290	8.30579e-06	5.58605e-06	3.72403e-06	0.027686
1291	5.08424e-06	3.4194e-06	2.2796e-06	0.0169475
1292	1.29826e-05	8.73143e-06	5.82095e-06	0.0432753
1293	8.73162e-06	5.87244e-06	3.91496e-06	0.0291054
1294	1.82874e-05	1.22992e-05	8.19944e-06	0.0609579
1295	3.2417e-05	2.1802e-05	1.45347e-05	0.108057
1296	1.45512e-05	9.78643e-06	6.52429e-06	0.0485042
1297	1.36673e-05	9.19191e-06	6.12794e-06	0.0455576
1298	7.87117e-06	5.29375e-06	3.52916e-06	0.0262372
1299	2.67696e-05	1.80038e-05	1.20026e-05	0.0892318
1300	1.44252e-05	9.70169e-06	6.46779e-06	0.0480842
1301	1.01829e-05	6.84851e-06	4.56567e-06	0.033943
1302	8.92866e-06	6.00496e-06	4.00331e-06	0.0297622
1303	1.0982e-05	7.38593e-06	4.92395e-06	0.0366066
1304	9.78469e-06	6.58068e-06	4.38712e-06	0.0326156
1305	1.53672e-05	1.03352e-05	6.89015e-06	0.0512241
1306	1.24698e-05	8.38653e-06	5.59102e-06	0.0415659
1307	1.16382e-05	7.82727e-06	5.21818e-06	0.038794
1308	1.11223e-05	7.48028e-06	4.98686e-06	0.0370743
1309	4.35031e-06	2.9258e-06	1.95053e-06	0.014501
1310	1.43482e-05	9.64989e-06	6.43326e-06	0.0478275
1311	1.41054e-05	9.48658e-06	6.32439e-06	0.047018
1312	1.74275e-05	1.17208e-05	7.81388e-06	0.0580915
1313	1.03295e-05	6.94709e-06	4.63139e-06	0.0344316
1314	9.05381e-06	6.08913e-06	4.05942e-06	0.0301794
1315	1.13312e-05	7.62079e-06	5.08053e-06	0.0377707
1316	9.89534e-06	6.6551e-06	4.43673e-06	0.0329845
1317	1.53309e-05	1.03108e-05	6.87386e-06	0.051103
1318	5.39766e-06	3.63019e-06	2.42013e-06	0.0179922
1319	7.04221e-06	4.73623e-06	3.15749e-06	0.023474
1320	5.33316e-06	3.58681e-06	2.39121e-06	0.0177772
1321	5.1541e-06	3.46638e-06	2.31092e-06	0.0171803
1322	1.60917e-05	1.08225e-05	7.21498e-06	0.053639
1323	7.91502e-06	5.32324e-06	3.54883e-06	0.0263834
1324	9.13263e-06	6.14214e-06	4.09476e-06	0.0304421
1325	1.34707e-05	9.05971e-06	6.03981e-06	0.0449024
1326	6.03313e-06	4.05757e-06	2.70505e-06	0.0201104
1327	1.13239e-05	7.61585e-06	5.07723e-06	0.0377462
1328	9.14641e-06	6.15141e-06	4.10094e-06	0.030488
1329	1.4053e-05	9.45135e-06	6.3009e-06	0.0468434
1330	1.60057e-05	1.07646e-05	7.17643e-06	0.0533525
1331	1.0179e-05	6.84591e-06	4.56394e-06	0.0339302
1332	1.50729e-05	1.01373e-05	6.75817e-06	0.0502429
1333	1.05138e-05	7.07104e-06	4.71402e-06	0.035046
1334	1.12623e-05	7.57448e-06	5.04965e-06	0.0375411
1335	9.07786e-06	6.10531e-06	4.0702e-06	0.0302595
1336	7.26953e-06	4.88912e-06	3.25941e-06	0.0242318
1337	8.2243e-06	5.53124e-06	3.6875e-06	0.0274143
1338	1.66702e-05	1.12115e-05	7.47434e-06	0.0555673
1339	1.13724e-05	7.64851e-06	5.09901e-06	0.0379081
1340	7.42748e-06	4.99534e-06	3.33023e-06	0.0247583
1341	1.33385e-05	8.97078e-06	5.98052e-06	0.0444616
1342	1.2474e-05	8.38936e-06	5.5929e-06	0.0415799
1343	1.34046e-05	9.01522e-06	6.01015e-06	0.0446819
1344	1.45512e-05	9.78638e-06	6.52425e-06	0.0485039
1345	1.18223e-05	7.95105e-06	5.3007e-06	0.0394075
1346	9.6909e-06	6.51761e-06	4.34507e-06	0.032303
1347	1.5862e-05	1.0668e-05	7.11197e-06	0.0528732
1348	1.58144e-05	1.06359e-05	7.09062e-06	0.0527145
1349	7.22606e-06	4.85988e-06	3.23992e-06	0.0240869
1350	7.50518e-06	5.0476e-06	3.36507e-06	0.0250173
1351	1.14938e-05	7.73013e-06	5.15342e-06	0.0383126
1352	2.0844e-05	1.40186e-05	9.34574e-06	0.06948
1353	2.48847e-05	1.67362e-05	1.11574e-05	0.0829489
1354	6.7352e-06	4.52975e-06	3.01984e-06	0.0224507
1355	6.56506e-06	4.41533e-06	2.94355e-06	0.0218835
1356	1.08762e-05	7.31481e-06	4.87654e-06	0.0362542
1357	7.55557e-06	5.08149e-06	3.38766e-06	0.0251852
1358	1.46703e-05	9.8665e-06	6.57766e-06	0.048901
1359	1.51839e-05	1.02119e-05	6.80794e-06	0.050613
1360	1.30796e-05	8.79667e-06	5.86444e-06	0.0435986
1361	1.85877e-05	1.25011e-05	8.33407e-06	0.0619588
1362	7.4569e-06	5.01513e-06	3.34342e-06	0.0248563
1363	6.5577e-06	4.41038e-06	2.94025e-06	0.021859
1364	8.16669e-06	5.4925e-06	3.66167e-06	0.0272223
1365	7.83731e-06	5.27097e-06	3.51398e-06	0.0261244
1366	1.20205e-05	8.08437e-06	5.38958e-06	0.0400683
1367	7.15456e-06	4.81179e-06	3.20786e-06	0.0238485
1368	1.05354e-05	7.0856e-06	4.72374e-06	0.0351181
1369	1.44372e-05	9.70976e-06	6.47317e-06	0.0481242
1370	6.3178e-06	4.24903e-06	2.83269e-06	0.0210593
1371	1.74938e-05	1.17654e-05	7.8436e-06	0.0583125
1372	8.97758e-06	6.03786e-06	4.02524e-06	0.0299253
1373	1.47178e-05	9.89844e-06	6.59896e-06	0.0490593
1374	7.2132e-06	4.85123e-06	3.23416e-06	0.024044
1375	1.54889e-05	1.0417e-05	6.94468e-06	0.0516295
1376	3.7351e-06	2.51204e-06	1.67469e-06	0.0124503
1377	7.68499e-06	5.16853e-06	3.44569e-06	0.0256166
1378	2.69733e-05	1.81409e-05	1.20939e-05	0.0899111
1379	9.40467e-06	6.3251e-06	4.21673e-06	0.0313489
1380	1.48769e-05	1.00054e-05	6.67028e-06	0.0495895
1381	9.01266e-06	6.06145e-06	4.04097e-06	0.0300422
1382	1.01053e-05	6.79634e-06	4.53089e-06	0.0336845
1383	1.89935e-05	1.27741e-05	8.51606e-06	0.0633118
1384	1.95371e-05	1.31397e-05	8.75978e-06	0.0651237
1385	3.93681e-06	2.6477e-06	1.76513e-06	0.0131227
1386	2.0963e-05	1.40986e-05	9.39908e-06	0.0698766
1387	1.46227e-05	9.83446e-06	6.55631e-06	0.0487422
1388	1.99177e-05	1.33956e-05	8.93042e-06	0.0663924
1389	1.65342e-05	1.112e-05	7.41336e-06	0.0551139
1390	8.95014e-06	6.01941e-06	4.01294e-06	0.0298338
1391	1.82368e-05	1.22651e-05	8.17675e-06	0.0607893
1392	1.79608e-05	1.20795e-05	8.053e-06	0.0598692
1393	1.06752e-05	7.17962e-06	4.78642e-06	0.0355841
1394	1.88834e-05	1.27e-05	8.4667e-06	0.0629448
1395	5.47403e-06	3.68155e-06	2.45437e-06	0.0182468
1396	1.25948e-05	8.47065e-06	5.6471e-06	0.0419828
1397	1.33762e-05	8.99613e-06	5.99742e-06	0.0445872
1398	1.06997e-05	7.19605e-06	4.79737e-06	0.0356655
1399	1.73767e-05	1.16867e-05	7.79112e-06	0.0579223
1400	7.85793e-06	5.28484e-06	3.52323e-06	0.0261931
1401	1.16182e-05	7.81384e-06	5.20923e-06	0.0387275
1402	9.9787e-06	6.71116e-06	4.47411e-06	0.0332623
1403	9.65262e-06	6.49186e-06	4.32791e-06	0.0321754
1404	1.36041e-05	9.14944e-06	6.09963e-06	0.0453471
1405	1.49974e-05	1.00865e-05	6.72432e-06	0.0499913
1406	2.18146e-05	1.46714e-05	9.78092e-06	0.0727153
1407	1.2077e-05	8.12236e-06	5.41491e-06	0.0402566
1408	7.62143e-06	5.12579e-06	3.41719e-06	0.0254048
1409	8.63942e-06	5.81044e-06	3.87362e-06	0.0287981
1410	4.38098e-06	2.94642e-06	1.96428e-06	0.0146033
1411	1.17632e-05	7.91131e-06	5.27421e-06	0.0392106
1412	1.26831e-05	8.53004e-06	5.68669e-06	0.0422771
1413	1.22481e-05	8.23747e-06	5.49165e-06	0.0408271
1414	1.3657e-05	9.18503e-06	6.12335e-06	0.0455234
1415	9.88129e-06	6.64565e-06	4.43043e-06	0.0329376
1416	7.5222e-06	5.05905e-06	3.3727e-06	0.025074
1417	5.85278e-06	3.93628e-06	2.62419e-06	0.0195093
1418	9.40493e-06	6.32528e-06	4.21685e-06	0.0313498
1419	5.13358e-06	3.45258e-06	2.30172e-06	0.0171119
1420	1.07183e-05	7.20855e-06	4.8057e-06	0.0357275
1421	5.87162e-06	3.94895e-06	2.63264e-06	0.0195721
1422	1.63337e-05	1.09852e-05	7.32349e-06	0.0544457
1423	2.26557e-05	1.5237e-05	1.0158e-05	0.0755188
1424	1.99263e-05	1.34014e-05	8.93427e-06	0.0664209
1425	7.99315e-06	5.37579e-06	3.58386e-06	0.0266438
1426	1.48648e-05	9.99727e-06	6.66485e-06	0.0495492
1427	1.24342e-05	8.36258e-06	5.57505e-06	0.0414472
1428	1.52842e-05	1.02794e-05	6.85293e-06	0.0509474
1429	2.48625e-05	1.67212e-05	1.11475e-05	0.0828749
1430	9.34765e-06	6.28676e-06	4.19117e-06	0.0311588
1431	1.18488e-05	7.96889e-06	5.3126e-06	0.039496
1432	5.53233e-06	3.72076e-06	2.48051e-06	0.0184411
1433	1.22893e-05	8.26517e-06	5.51011e-06	0.0409644
1434	1.04712e-05	7.04241e-06	4.69494e-06	0.0349041
1435	1.13451e-05	7.63011e-06	5.08674e-06	0.0378169
1436	9.49673e-06	6.38702e-06	4.25801e-06	0.0316558
1437	7.94759e-06	5.34514e-06	3.56343e-06	0.026492
1438	1.02243e-05	6.87637e-06	4.58424e-06	0.0340811
1439	1.02484e-05	6.89256e-06	4.59504e-06	0.0341614
1440	1.28218e-05	8.62327e-06	5.74885e-06	0.0427392
1441	8.87885e-06	5.97146e-06	3.98097e-06	0.0295962
1442	1.41804e-05	9.53701e-06	6.358e-06	0.047268
1443	1.21446e-05	8.16785e-06	5.44523e-06	0.040482
1444	7.60408e-06	5.11412e-06	3.40941e-06	0.0253469
1445	1.55642e-05	1.04677e-05	6.97845e-06	0.0518806
1446	7.24428e-06	4.87213e-06	3.24809e-06	0.0241476
1447	8.9369e-06	6.0105e-06	4.007e-06	0.0297897
1448	7.00004e-06	4.70787e-06	3.13858e-06	0.0233335
1449	1.64788e-05	1.10828e-05	7.38852e-06	0.0549292
1450	6.98939e-06	4.70071e-06	3.1338e-06	0.023298
1451	5.32802e-06	3.58335e-06	2.3889e-06	0.0177601
1452	2.34733e-05	1.57869e-05	1.05246e-05	0.0782443
1453	2.98898e-05	2.01024e-05	1.34016e-05	0.0996328
1454	9.39385e-06	6.31783e-06	4.21188e-06	0.0313128
1455	1.20675e-05	8.11598e-06	5.41066e-06	0.040225
1456	1.35179e-05	9.09146e-06	6.06097e-06	0.0450597
1457	1.14736e-05	7.71658e-06	5.14438e-06	0.0382454
1458	1.0142e-05	6.82097e-06	4.54731e-06	0.0338066
1459	1.41997e-05	9.55001e-06	6.36667e-06	0.0473324
1460	7.77749e-06	5.23074e-06	3.48716e-06	0.025925
1461	4.97832e-06	3.34817e-06	2.23211e-06	0.0165944
1462	1.09079e-05	7.3361e-06	4.89074e-06	0.0363597
1463	1.10814e-05	7.45278e-06	4.96852e-06	0.036938
1464	1.27155e-05	8.55183e-06	5.70122e-06	0.0423852
1465	8.91225e-06	5.99392e-06	3.99595e-06	0.0297075
1466	1.01332e-05	6.81509e-06	4.5434e-06	0.0337774
1467	1.97403e-05	1.32763e-05	8.85086e-06	0.0658008
1468	1.20089e-05	8.07658e-06	5.38439e-06	0.0400297
1469	1.36485e-05	9.1793e-06	6.11953e-06	0.0454951
1470	6.05342e-06	4.07122e-06	2.71415e-06	0.0201781
1471	6.52915e-06	4.39117e-06	2.92745e-06	0.0217638
1472	1.69085e-05	1.13718e-05	7.58118e-06	0.0563615
1473	9.63135e-06	6.47756e-06	4.31837e-06	0.0321045
1474	4.41746e-06	2.97096e-06	1.98064e-06	0.0147249
1475	9.03546e-06	6.07679e-06	4.05119e-06	0.0301182
1476	7.09828e-06	4.77394e-06	3.18263e-06	0.0236609
1477	5.0373e-06	3.38783e-06	2.25856e-06	0.016791
1478	6.90122e-06	4.64141e-06	3.09427e-06	0.0230041
1479	6.14949e-06	4.13584e-06	2.75722e-06	0.0204983
1480	1.1984e-05	8.05986e-06	5.37324e-06	0.0399468
1481	1.87429e-05	1.26055e-05	8.40369e-06	0.0624764
1482	1.00739e-05	6.77521e-06	4.51681e-06	0.0335798
1483	8.03401e-06	5.40327e-06	3.60218e-06	0.02678
1484	1.18524e-05	7.97132e-06	5.31422e-06	0.039508
1485	9.99678e-06	6.72333e-06	4.48222e-06	0.0333226
1486	9.52133e-06	6.40356e-06	4.26904e-06	0.0317378
1487	1.66082e-05	1.11699e-05	7.44657e-06	0.0553608
1488	1.12671e-05	7.57765e-06	5.05177e-06	0.0375569
1489	1.96013e-05	1.31828e-05	8.78856e-06	0.0653377
1490	1.22428e-05	8.23386e-06	5.48924e-06	0.0408092
1491	7.76285e-06	5.2209e-06	3.4806e-06	0.0258762
1492	1.26648e-05	8.51768e-06	5.67845e-06	0.0422159
1493	6.1481e-06	4.1349e-06	2.7566e-06	0.0204937
1494	1.11741e-05	7.51513e-06	5.01009e-06	0.037247
1495	1.81667e-05	1.2218e-05	8.14533e-06	0.0605556
1496	1.47993e-05	9.95324e-06	6.63549e-06	0.0493309
1497	1.17009e-05	7.86941e-06	5.24628e-06	0.0390029
1498	1.0253e-05	6.89566e-06	4.59711e-06	0.0341768
1499	1.38659e-05	9.3255e-06	6.217e-06	0.0462197
1500	1.21573e-05	8.1764e-06	5.45093e-06	0.0405244
1501	4.53347e-06	3.04898e-06	2.03265e-06	0.0151116
1502	1.04525e-05	7.02982e-06	4.68655e-06	0.0348417
1503	5.28946e-06	3.55742e-06	2.37161e-06	0.0176315
1504	1.0691e-05	7.19024e-06	4.7935e-06	0.0356368
1505	1.29555e-05	8.71323e-06	5.80882e-06	0.0431851
1506	1.61996e-05	1.0895e-05	7.26335e-06	0.0539987
1507	2.37342e-05	1.59624e-05	1.06416e-05	0.079114
1508	7.11465e-06	4.78495e-06	3.18997e-06	0.0237155
1509	1.08492e-05	7.29665e-06	4.86443e-06	0.0361641
1510	1.30897e-05	8.80347e-06	5.86898e-06	0.0436323
1511	1.52778e-05	1.02751e-05	6.85006e-06	0.0509261
1512	1.96376e-05	1.32073e-05	8.80484e-06	0.0654587
1513	9.16423e-06	6.16339e-06	4.10893e-06	0.0305474
1514	1.04022e-05	6.99601e-06	4.66401e-06	0.0346741
1515	1.75402e-05	1.17966e-05	7.86441e-06	0.0584672
1516	9.77459e-06	6.57389e-06	4.3826e-06	0.032582
1517	1.22229e-05	8.22048e-06	5.48032e-06	0.0407429
1518	1.77271e-05	1.19223e-05	7.94823e-06	0.0590903
1519	2.50889e-05	1.68735e-05	1.1249e-05	0.0836296
1520	7.3586e-06	4.94902e-06	3.29935e-06	0.0245287
1521	1.25859e-05	8.46463e-06	5.64309e-06	0.041953
1522	4.23413e-06	2.84766e-06	1.89844e-06	0.0141138
1523	1.4806e-05	9.95779e-06	6.63853e-06	0.0493535
1524	1.38855e-05	9.33867e-06	6.22578e-06	0.0462849
1525	1.19603e-05	8.04386e-06	5.36257e-06	0.0398675
1526	1.41624e-05	9.52491e-06	6.34994e-06	0.047208
1527	1.11455e-05	7.49589e-06	4.99726e-06	0.0371516
1528	1.20688e-05	8.11686e-06	5.41124e-06	0.0402293
1529	2.26898e-05	1.526e-05	1.01733e-05	0.0756327
1530	2.6149e-05	1.75865e-05	1.17243e-05	0.0871633
1531	1.28487e-05	8.64138e-06	5.76092e-06	0.042829
1532	1.08406e-05	7.29086e-06	4.86057e-06	0.0361355
1533	1.46399e-05	9.84603e-06	6.56402e-06	0.0487996
1534	9.33014e-06	6.27498e-06	4.18332e-06	0.0311005
1535	6.90073e-06	4.64108e-06	3.09405e-06	0.0230024
1536	1.96244e-05	1.31983e-05	8.7989e-06	0.0654146
1537	7.09354e-06	4.77076e-06	3.1805e-06	0.0236451
1538	1.59318e-05	1.07149e-05	7.14327e-06	0.053106
1539	1.34129e-05	9.02082e-06	6.01388e-06	0.0447096
1540	5.8787e-06	3.95372e-06	2.63581e-06	0.0195957
1541	9.27039e-06	6.23479e-06	4.15653e-06	0.0309013
1542	7.40577e-06	4.98074e-06	3.32049e-06	0.0246859
1543	6.80369e-06	4.57582e-06	3.05055e-06	0.022679
1544	1.01929e-05	6.8552e-06	4.57013e-06	0.0339762
1545	1.43614e-05	9.65876e-06	6.43918e-06	0.0478714
1546	2.52412e-05	1.6976e-05	1.13173e-05	0.0841375
1547	1.50251e-05	1.01051e-05	6.73674e-06	0.0500836
1548	1.66457e-05	1.11951e-05	7.46337e-06	0.0554857
1549	1.1421e-05	7.6812e-06	5.1208e-06	0.0380701
1550	5.39119e-06	3.62584e-06	2.41723e-06	0.0179706
1551	1.64662e-05	1.10743e-05	7.3829e-06	0.0548874
1552	1.02012e-05	6.8608e-06	4.57387e-06	0.034004
1553	6.92591e-06	4.65801e-06	3.10534e-06	0.0230864
1554	9.99952e-06	6.72517e-06	4.48345e-06	0.0333317
1555	7.19402e-06	4.83833e-06	3.22555e-06	0.0239801
1556	8.3232e-06	5.59776e-06	3.73184e-06	0.027744
1557	8.37723e-06	5.63409e-06	3.75606e-06	0.0279241
1558	7.31102e-06	4.91702e-06	3.27801e-06	0.0243701
1559	7.153e-06	4.81074e-06	3.20716e-06	0.0238433
1560	1.54252e-05	1.03742e-05	6.91615e-06	0.0514175
1561	1.05693e-05	7.10839e-06	4.73893e-06	0.0352311
1562	8.16702e-06	5.49272e-06	3.66181e-06	0.0272234
1563	1.14422e-05	7.69547e-06	5.13031e-06	0.0381408
1564	1.32463e-05	8.90877e-06	5.93918e-06	0.0441543
1565	9.16941e-06	6.16688e-06	4.11125e-06	0.0305647
1566	8.48817e-06	5.70871e-06	3.80581e-06	0.0282939
1567	9.60457e-06	6.45955e-06	4.30636e-06	0.0320152
1568	6.73581e-06	4.53016e-06	3.02011e-06	0.0224527
1569	1.53119e-05	1.0298e-05	6.86536e-06	0.0510398
1570	9.53517e-06	6.41287e-06	4.27524e-06	0.0317839
1571	1.73257e-05	1.16524e-05	7.76827e-06	0.0577525
1572	1.35314e-05	9.1005e-06	6.067e-06	0.0451045
1573	1.40485e-05	9.44833e-06	6.29889e-06	0.0468284
1574	1.51979e-05	1.02213e-05	6.81423e-06	0.0506597
1575	1.59241e-05	1.07097e-05	7.13983e-06	0.0530804
1576	1.11957e-05	7.52964e-06	5.01976e-06	0.0373189
1577	1.95932e-05	1.31774e-05	8.78494e-06	0.0653108
1578	8.35359e-06	5.6182e-06	3.74547e-06	0.0278453
1579	7.76538e-06	5.2226e-06	3.48173e-06	0.0258846
1580	1.96346e-05	1.32052e-05	8.8035e-06	0.0654488
1581	1.27167e-05	8.55263e-06	5.70176e-06	0.0423891
1582	1.49338e-05	1.00437e-05	6.69582e-06	0.0497794
1583	1.62068e-05	1.08998e-05	7.26656e-06	0.0540225
1584	1.11752e-05	7.51586e-06	5.01057e-06	0.0372506
1585	1.22764e-05	8.25647e-06	5.50432e-06	0.0409213
1586	7.87595e-06	5.29697e-06	3.53131e-06	0.0262532
1587	5.03048e-06	3.38324e-06	2.2555e-06	0.0167683
1588	9.11849e-06	6.13263e-06	4.08842e-06	0.030395
1589	1.2257e-05	8.24344e-06	5.49563e-06	0.0408567
1590	1.19763e-05	8.05463e-06	5.36975e-06	0.0399209
1591	1.48128e-05	9.96234e-06	6.64156e-06	0.0493761
1592	1.44461e-05	9.71573e-06	6.47715e-06	0.0481538
1593	1.27825e-05	8.59689e-06	5.73126e-06	0.0426085
1594	8.1423e-06	5.47609e-06	3.65073e-06	0.027141
1595	1.24988e-05	8.40604e-06	5.60402e-06	0.0416626
1596	9.09625e-06	6.11768e-06	4.07845e-06	0.0303208
1597	1.5365e-05	1.03337e-05	6.88913e-06	0.0512166
1598	1.48257e-05	9.971e-06	6.64734e-06	0.049419
1599	1.38099e-05	9.2878e-06	6.19187e-06	0.0460328
1600	8.90643e-06	5.99001e-06	3.99334e-06	0.0296881
1601	1.38156e-05	9.29169e-06	6.19446e-06	0.0460521
1602	5.48637e-06	3.68986e-06	2.4599e-06	0.0182879
1603	8.78159e-06	5.90605e-06	3.93737e-06	0.029272
1604	9.21602e-06	6.19822e-06	4.13215e-06	0.0307201
1605	1.205e-05	8.10421e-06	5.4028e-06	0.0401666
1606	9.68809e-06	6.51571e-06	4.34381e-06	0.0322936
1607	8.10405e-06	5.45037e-06	3.63358e-06	0.0270135
1608	5.05122e-06	3.39719e-06	2.26479e-06	0.0168374
1609	1.48267e-05	9.9717e-06	6.6478e-06	0.0494224
1610	1.29788e-05	8.72888e-06	5.81925e-06	0.0432627
1611	6.42846e-06	4.32345e-06	2.8823e-06	0.0214282
1612	1.62745e-05	1.09454e-05	7.29695e-06	0.0542485
1613	8.71328e-06	5.86011e-06	3.90674e-06	0.0290443
1614	6.91869e-06	4.65316e-06	3.1021e-06	0.0230623
1615	1.16864e-05	7.85969e-06	5.23979e-06	0.0389547
1616	1.48412e-05	9.98145e-06	6.6543e-06	0.0494708
1617	1.50929e-05	1.01507e-05	6.76714e-06	0.0503097
1618	1.1901e-05	8.00403e-06	5.33602e-06	0.0396701
1619	1.70907e-05	1.14943e-05	7.66287e-06	0.0569689
1620	8.51618e-06	5.72755e-06	3.81836e-06	0.0283873
1621	6.09256e-06	4.09755e-06	2.7317e-06	0.0203085
1622	1.08097e-05	7.27007e-06	4.84671e-06	0.0360324
1623	1.02313e-05	6.88102e-06	4.58735e-06	0.0341042
1624	1.39022e-05	9.34989e-06	6.23326e-06	0.0463406
1625	1.27748e-05	8.59168e-06	5.72778e-06	0.0425827
1626	7.12271e-06	4.79037e-06	3.19358e-06	0.0237424
1627	1.24031e-05	8.34169e-06	5.56113e-06	0.0413437
1628	4.20544e-06	2.82836e-06	1.88558e-06	0.0140181
1629	9.75791e-06	6.56268e-06	4.37512e-06	0.0325264
1630	1.18082e-05	7.94163e-06	5.29442e-06	0.0393608
1631	9.80915e-06	6.59714e-06	4.39809e-06	0.0326972
1632	1.42609e-05	9.59117e-06	6.39411e-06	0.0475364
1633	6.12227e-06	4.11753e-06	2.74502e-06	0.0204076
1634	6.73996e-06	4.53295e-06	3.02197e-06	0.0224665
1635	4.56322e-06	3.06899e-06	2.04599e-06	0.0152107
1636	1.07705e-05	7.24369e-06	4.82913e-06	0.0359017
1637	1.74683e-05	1.17483e-05	7.83217e-06	0.0582275
1638	4.30558e-06	2.89572e-06	1.93048e-06	0.0143519
1639	1.47481e-05	9.91885e-06	6.61257e-06	0.0491605
1640	5.78502e-06	3.89071e-06	2.59381e-06	0.0192834
1641	6.73671e-06	4.53077e-06	3.02051e-06	0.0224557
1642	1.16675e-05	7.84694e-06	5.23129e-06	0.0388915
1643	6.56932e-06	4.41819e-06	2.94546e-06	0.0218977
1644	1.44112e-05	9.69227e-06	6.46151e-06	0.0480375
1645	8.78804e-06	5.91039e-06	3.94026e-06	0.0292935
1646	1.23258e-05	8.28968e-06	5.52645e-06	0.0410859
1647	1.12098e-05	7.53912e-06	5.02608e-06	0.0373659
1648	1.68509e-05	1.1333e-05	7.55537e-06	0.0561696
1649	7.66013e-06	5.15181e-06	3.43454e-06	0.0255338
1650	1.87916e-05	1.26383e-05	8.4255e-06	0.0626386
1651	2.96578e-05	1.99463e-05	1.32975e-05	0.0988592
1652	1.38988e-05	9.34763e-06	6.23175e-06	0.0463294
1653	1.09458e-05	7.36158e-06	4.90772e-06	0.036486
1654	5.22455e-06	3.51376e-06	2.34251e-06	0.0174152
1655	1.35194e-05	9.09243e-06	6.06162e-06	0.0450645
1656	1.2307e-05	8.27709e-06	5.51806e-06	0.0410235
1657	9.38215e-06	6.30995e-06	4.20664e-06	0.0312738
1658	1.46515e-05	9.85387e-06	6.56924e-06	0.0488384
1659	7.13702e-06	4.8e-06	3.2e-06	0.0237901
1660	1.2174e-05	8.18764e-06	5.45843e-06	0.0405801
1661	8.93223e-06	6.00736e-06	4.00491e-06	0.0297741
1662	7.71431e-06	5.18825e-06	3.45884e-06	0.0257144
1663	1.93057e-05	1.2984e-05	8.656e-06	0.0643522
1664	1.26152e-05	8.48431e-06	5.65621e-06	0.0420505
1665	6.50012e-06	4.37165e-06	2.91443e-06	0.0216671
1666	1.48997e-05	1.00208e-05	6.68051e-06	0.0496656
1667	3.52579e-06	2.37126e-06	1.58084e-06	0.0117526
1668	1.42677e-05	9.59574e-06	6.39716e-06	0.0475591
1669	1.09061e-05	7.33488e-06	4.88992e-06	0.0363536
1670	8.52962e-06	5.73659e-06	3.82439e-06	0.0284321
1671	1.41569e-05	9.52119e-06	6.34746e-06	0.0471896
1672	8.66531e-06	5.82785e-06	3.88523e-06	0.0288844
1673	6.95761e-06	4.67933e-06	3.11956e-06	0.023192
1674	1.04869e-05	7.05295e-06	4.70196e-06	0.0349563
1675	1.01504e-05	6.82667e-06	4.55111e-06	0.0338348
1676	1.1665e-05	7.8453e-06	5.2302e-06	0.0388834
1677	2.61175e-05	1.75653e-05	1.17102e-05	0.0870584
1678	5.2243e-06	3.5136e-06	2.3424e-06	0.0174143
1679	9.58317e-06	6.44515e-06	4.29677e-06	0.0319439
1680	1.2822e-05	8.62341e-06	5.74894e-06	0.0427399
1681	1.55142e-05	1.04341e-05	6.95606e-06	0.0517141
1682	7.95866e-06	5.35259e-06	3.56839e-06	0.0265289
1683	2.02286e-05	1.36047e-05	9.06981e-06	0.0674287
1684	1.54389e-05	1.03834e-05	6.92229e-06	0.0514631
1685	5.84366e-06	3.93015e-06	2.6201e-06	0.0194789
1686	1.06395e-05	7.15561e-06	4.77041e-06	0.0354651
1687	1.22553e-05	8.24231e-06	5.49488e-06	0.0408511
1688	1.85135e-05	1.24512e-05	8.30081e-06	0.0617116
1689	1.24586e-05	8.37902e-06	5.58601e-06	0.0415287
1690	8.07619e-06	5.43163e-06	3.62109e-06	0.0269206
1691	1.03743e-05	6.97725e-06	4.6515e-06	0.0345811
1692	4.30891e-06	2.89796e-06	1.93197e-06	0.014363
1693	1.96729e-05	1.3231e-05	8.82065e-06	0.0655763
1694	4.9818e-06	3.3505e-06	2.23367e-06	0.016606
1695	1.18585e-05	7.9754e-06	5.31694e-06	0.0395282
1696	3.50085e-05	2.35449e-05	1.56966e-05	0.116695
1697	9.83002e-06	6.61117e-06	4.40745e-06	0.0327667
1698	5.71749e-06	3.84529e-06	2.56353e-06	0.0190583
1699	8.50758e-06	5.72176e-06	3.81451e-06	0.0283586
1700	8.33229e-06	5.60387e-06	3.73592e-06	0.0277743
1701	8.0391e-06	5.40669e-06	3.60446e-06	0.026797
1702	1.25778e-05	8.45921e-06	5.63947e-06	0.0419261
1703	1.08348e-05	7.28697e-06	4.85798e-06	0.0361162
1704	6.12449e-06	4.11902e-06	2.74601e-06	0.020415
1705	1.34916e-05	9.07374e-06	6.04916e-06	0.0449719
1706	7.82831e-06	5.26492e-06	3.50995e-06	0.0260944
1707	1.31198e-05	8.82368e-06	5.88245e-06	0.0437325
1708	9.22023e-06	6.20106e-06	4.13404e-06	0.0307341
1709	9.97042e-06	6.7056e-06	4.4704e-06	0.0332347
1710	1.81711e-05	1.22209e-05	8.1473e-06	0.0605703
1711	1.16897e-05	7.86191e-06	5.24127e-06	0.0389657
1712	8.875e-06	5.96887e-06	3.97925e-06	0.0295833
1713	1.21583e-05	8.17703e-06	5.45135e-06	0.0405276
1714	1.87503e-05	1.26105e-05	8.40702e-06	0.0625011
1715	1.01587e-05	6.83221e-06	4.55481e-06	0.0338623
1716	1.45411e-05	9.7796e-06	6.51973e-06	0.0484703
1717	1.88069e-05	1.26486e-05	8.43239e-06	0.0626898
1718	1.38084e-05	9.28682e-06	6.19121e-06	0.0460279
1719	1.38189e-05	9.29387e-06	6.19591e-06	0.0460629
1720	1.61219e-05	1.08428e-05	7.22851e-06	0.0537397
1721	1.05071e-05	7.06655e-06	4.71103e-06	0.0350237
1722	1.44684e-05	9.73068e-06	6.48712e-06	0.0482279
1723	1.16439e-05	7.83111e-06	5.22074e-06	0.0388131
1724	1.01799e-05	6.84647e-06	4.56431e-06	0.0339329
1725	1.75537e-05	1.18057e-05	7.87047e-06	0.0585122
1726	8.82929e-06	5.93813e-06	3.95875e-06	0.029431
1727	1.39812e-05	9.40306e-06	6.26871e-06	0.0466041
1728	1.18637e-05	7.97893e-06	5.31928e-06	0.0395457
1729	7.65992e-06	5.15167e-06	3.43445e-06	0.0255331
1730	1.19192e-05	8.01626e-06	5.34417e-06	0.0397307
1731	8.61474e-06	5.79384e-06	3.86256e-06	0.0287158
1732	9.49888e-06	6.38846e-06	4.25897e-06	0.0316629
1733	1.29014e-05	8.67686e-06	5.78457e-06	0.0430048
1734	1.20196e-05	8.08379e-06	5.38919e-06	0.0400654
1735	8.83695e-06	5.94328e-06	3.96219e-06	0.0294565
1736	9.6343e-06	6.47954e-06	4.31969e-06	0.0321143
1737	8.88796e-06	5.97759e-06	3.98506e-06	0.0296265
1738	6.05167e-06	4.07005e-06	2.71336e-06	0.0201722
1739	7.57367e-06	5.09366e-06	3.39578e-06	0.0252456
1740	1.31007e-05	8.81087e-06	5.87391e-06	0.043669
1741	1.05351e-05	7.0854e-06	4.7236e-06	0.0351171
1742	7.89329e-06	5.30862e-06	3.53908e-06	0.026311
1743	1.13958e-05	7.66424e-06	5.10949e-06	0.037986
1744	5.2423e-06	3.5257e-06	2.35047e-06	0.0174743
1745	1.54612e-05	1.03984e-05	6.93226e-06	0.0515372
1746	1.78319e-05	1.19928e-05	7.99523e-06	0.0594398
1747	1.02575e-05	6.89868e-06	4.59912e-06	0.0341917
1748	5.83796e-06	3.92631e-06	2.61754e-06	0.0194599
1749	3.25042e-05	2.18607e-05	1.45738e-05	0.108347
1750	8.7866e-06	5.90942e-06	3.93961e-06	0.0292887
1751	1.27289e-05	8.56079e-06	5.7072e-06	0.0424296
1752	6.59283e-06	4.434e-06	2.956e-06	0.0219761
1753	1.08559e-05	7.30112e-06	4.86741e-06	0.0361863
1754	8.79893e-06	5.91771e-06	3.94514e-06	0.0293298
1755	7.0293e-06	4.72755e-06	3.1517e-06	0.023431
1756	1.0507e-05	7.06646e-06	4.71098e-06	0.0350233
1757	1.45562e-05	9.78973e-06	6.52649e-06	0.0485205
1758	1.12427e-05	7.56128e-06	5.04085e-06	0.0374757
1759	2.15329e-05	1.44819e-05	9.65461e-06	0.0717763
1760	1.71928e-05	1.1563e-05	7.70865e-06	0.0573092
1761	7.54389e-06	5.07364e-06	3.38243e-06	0.0251463
1762	1.37307e-05	9.23456e-06	6.15637e-06	0.0457689
1763	1.17539e-05	7.90507e-06	5.27004e-06	0.0391796
1764	2.05583e-05	1.38265e-05	9.21764e-06	0.0685277
1765	2.19251e-05	1.47457e-05	9.83047e-06	0.0730837
1766	1.54737e-05	1.04068e-05	6.93789e-06	0.051579
1767	3.14782e-05	2.11706e-05	1.41137e-05	0.104927
1768	1.5234e-05	1.02456e-05	6.8304e-06	0.05078
1769	8.80444e-06	5.92142e-06	3.94761e-06	0.0293481
1770	1.33914e-05	9.00638e-06	6.00425e-06	0.044638
1771	1.06869e-05	7.18747e-06	4.79165e-06	0.035623
1772	8.36228e-06	5.62404e-06	3.74936e-06	0.0278743
1773	1.17844e-05	7.92555e-06	5.2837e-06	0.0392812
1774	1.2619e-05	8.48692e-06	5.65794e-06	0.0420634
1775	2.02935e-05	1.36484e-05	9.09893e-06	0.0676451
1776	1.23816e-05	8.32723e-06	5.55149e-06	0.041272
1777	1.07703e-05	7.24355e-06	4.82903e-06	0.035901
1778	7.08971e-06	4.76818e-06	3.17878e-06	0.0236324
1779	1.38682e-05	9.32705e-06	6.21804e-06	0.0462274
1780	9.83013e-06	6.61124e-06	4.40749e-06	0.0327671
1781	8.03959e-06	5.40702e-06	3.60468e-06	0.0267986
1782	1.37765e-05	9.26534e-06	6.17689e-06	0.0459215
1783	1.68728e-05	1.13478e-05	7.5652e-06	0.0562427
1784	6.9253e-06	4.6576e-06	3.10507e-06	0.0230843
1785	8.37555e-06	5.63297e-06	3.75531e-06	0.0279185
1786	1.02884e-05	6.91949e-06	4.61299e-06	0.0342948
1787	1.40803e-05	9.46972e-06	6.31315e-06	0.0469345
1788	8.69402e-06	5.84716e-06	3.8981e-06	0.0289801
1789	1.57711e-05	1.06068e-05	7.07121e-06	0.0525702
1790	4.6501e-06	3.12742e-06	2.08495e-06	0.0155003
1791	1.13307e-05	7.62044e-06	5.08029e-06	0.0377689
1792	7.84488e-06	5.27606e-06	3.51738e-06	0.0261496
1793	1.44379e-05	9.71021e-06	6.47347e-06	0.0481264
1794	1.13228e-05	7.61516e-06	5.07677e-06	0.0377428
1795	4.34093e-06	2.91949e-06	1.94633e-06	0.0144698
1796	5.59193e-06	3.76085e-06	2.50723e-06	0.0186398
1797	1.04764e-05	7.04589e-06	4.69726e-06	0.0349213
1798	7.45738e-06	5.01545e-06	3.34363e-06	0.0248579
1799	9.11318e-06	6.12906e-06	4.08604e-06	0.0303773
1800	7.75006e-06	5.21229e-06	3.47486e-06	0.0258335
1801	7.66991e-06	5.15839e-06	3.43893e-06	0.0255664
1802	9.61343e-06	6.46551e-06	4.31034e-06	0.0320448
1803	5.38e-06	3.61832e-06	2.41221e-06	0.0179333
1804	8.80419e-06	5.92125e-06	3.9475e-06	0.0293473
1805	8.38206e-06	5.63735e-06	3.75823e-06	0.0279402
1806	8.0626e-06	5.42249e-06	3.61499e-06	0.0268753
1807	9.67823e-06	6.50908e-06	4.33939e-06	0.0322608
1808	1.6986e-05	1.14239e-05	7.61596e-06	0.0566201
1809	7.70216e-06	5.18008e-06	3.45339e-06	0.0256739
1810	1.26815e-05	8.5289e-06	5.68593e-06	0.0422715
1811	1.37345e-05	9.23715e-06	6.1581e-06	0.0457818
1812	1.44421e-05	9.71299e-06	6.47533e-06	0.0481402
1813	9.8665e-06	6.63571e-06	4.4238e-06	0.0328883
1814	1.29646e-05	8.71931e-06	5.81287e-06	0.0432153
1815	1.38042e-05	9.28399e-06	6.18933e-06	0.0460139
1816	1.28723e-05	8.65724e-06	5.77149e-06	0.0429076
1817	6.66859e-06	4.48496e-06	2.98997e-06	0.0222286
1818	8.23953e-06	5.54149e-06	3.69433e-06	0.0274651
1819	1.0322e-05	6.94203e-06	4.62802e-06	0.0344066
1820	7.90945e-06	5.31949e-06	3.54633e-06	0.0263648
1821	8.57861e-06	5.76954e-06	3.84636e-06	0.0285954
1822	1.02778e-05	6.9123e-06	4.6082e-06	0.0342592
1823	9.96388e-06	6.7012e-06	4.46747e-06	0.0332129
1824	7.55155e-06	5.07879e-06	3.38586e-06	0.0251718
1825	1.03504e-05	6.96113e-06	4.64075e-06	0.0345012
1826	8.57543e-06	5.7674e-06	3.84493e-06	0.0285848
1827	8.56993e-06	5.7637e-06	3.84247e-06	0.0285664
1828	1.06535e-05	7.16497e-06	4.77665e-06	0.0355115
1829	2.18388e-05	1.46877e-05	9.79177e-06	0.072796
1830	1.03439e-05	6.95679e-06	4.63786e-06	0.0344797
1831	9.73875e-06	6.54979e-06	4.36653e-06	0.0324625
1832	1.62054e-05	1.08989e-05	7.26593e-06	0.0540178
1833	1.00876e-05	6.78438e-06	4.52292e-06	0.0336252
1834	8.31135e-06	5.58979e-06	3.72653e-06	0.0277045
1835	1.06203e-05	7.14269e-06	4.76179e-06	0.0354011
1836	8.18877e-06	5.50735e-06	3.67156e-06	0.0272959
1837	1.36696e-05	9.19346e-06	6.12898e-06	0.0455653
1838	1.57374e-05	1.05842e-05	7.05611e-06	0.052458
1839	1.13848e-05	7.65681e-06	5.10454e-06	0.0379492
1840	1.28128e-05	8.61723e-06	5.74482e-06	0.0427093
1841	1.52604e-05	1.02634e-05	6.84226e-06	0.0508681
1842	1.74799e-05	1.17561e-05	7.83738e-06	0.0582663
1843	8.18732e-06	5.50638e-06	3.67092e-06	0.0272911
1844	1.87273e-05	1.2595e-05	8.39667e-06	0.0624243
1845	1.02447e-05	6.89006e-06	4.59337e-06	0.034149
1846	2.17893e-05	1.46544e-05	9.76957e-06	0.0726309
1847	1.42602e-05	9.59066e-06	6.39377e-06	0.0475339
1848	1.81664e-05	1.22178e-05	8.14521e-06	0.0605548
1849	1.09359e-05	7.3549e-06	4.90326e-06	0.0364528
1850	5.80502e-06	3.90416e-06	2.60278e-06	0.0193501
1851	9.13744e-06	6.14538e-06	4.09692e-06	0.0304581
1852	7.15555e-06	4.81246e-06	3.20831e-06	0.0238518
1853	3.98195e-06	2.67806e-06	1.78537e-06	0.0132732
1854	1.02436e-05	6.88935e-06	4.5929e-06	0.0341455
1855	1.41905e-05	9.54381e-06	6.36254e-06	0.0473017
1856	1.29155e-05	8.68631e-06	5.79087e-06	0.0430517
1857	1.13499e-05	7.63337e-06	5.08891e-06	0.037833
1858	1.89548e-05	1.27481e-05	8.4987e-06	0.0631828
1859	6.04845e-06	4.06788e-06	2.71192e-06	0.0201615
1860	8.4557e-06	5.68687e-06	3.79125e-06	0.0281857
1861	1.50783e-05	1.01409e-05	6.76061e-06	0.0502611
1862	1.39695e-05	9.39517e-06	6.26345e-06	0.046565
1863	1.48997e-05	1.00208e-05	6.68051e-06	0.0496656
1864	2.61114e-05	1.75612e-05	1.17074e-05	0.0870378
1865	1.30814e-05	8.79789e-06	5.86526e-06	0.0436047
1866	8.44077e-06	5.67683e-06	3.78455e-06	0.0281359
1867	1.47648e-05	9.93002e-06	6.62001e-06	0.0492158
1868	1.12967e-05	7.59755e-06	5.06503e-06	0.0376555
1869	8.41064e-06	5.65657e-06	3.77105e-06	0.0280355
1870	1.29396e-05	8.70253e-06	5.80169e-06	0.0431321
1871	2.62503e-05	1.76546e-05	1.17697e-05	0.0875009
1872	3.93481e-06	2.64636e-06	1.76424e-06	0.013116
1873	1.05904e-05	7.12256e-06	4.74837e-06	0.0353013
1874	1.03046e-05	6.93036e-06	4.62024e-06	0.0343487
1875	1.50877e-05	1.01472e-05	6.76483e-06	0.0502925
1876	1.24651e-05	8.38336e-06	5.58891e-06	0.0415502
1877	6.47326e-06	4.35358e-06	2.90239e-06	0.0215775
1878	1.38342e-05	9.30418e-06	6.20279e-06	0.046114
1879	2.22067e-05	1.49351e-05	9.95674e-06	0.0740224
1880	9.18538e-06	6.17762e-06	4.11841e-06	0.0306179
1881	1.1729e-05	7.88829e-06	5.25886e-06	0.0390965
1882	1.01964e-05	6.85756e-06	4.57171e-06	0.0339879
1883	8.81736e-06	5.93011e-06	3.9534e-06	0.0293912
1884	9.50843e-06	6.39489e-06	4.26326e-06	0.0316948
1885	3.73903e-06	2.51468e-06	1.67646e-06	0.0124634
1886	2.18274e-05	1.468e-05	9.78666e-06	0.0727579
1887	6.37189e-06	4.28541e-06	2.85694e-06	0.0212396
1888	1.1698e-05	7.86747e-06	5.24498e-06	0.0389933
1889	1.11099e-05	7.47194e-06	4.98129e-06	0.0370329
1890	6.47194e-06	4.35269e-06	2.9018e-06	0.0215731
1891	1.57475e-05	1.0591e-05	7.06066e-06	0.0524918
1892	1.4215e-05	9.56029e-06	6.37353e-06	0.0473834
1893	1.62718e-05	1.09436e-05	7.29574e-06	0.0542395
1894	5.81095e-06	3.90815e-06	2.60543e-06	0.0193698
1895	1.51667e-05	1.02004e-05	6.80024e-06	0.0505557
1896	6.3762e-06	4.28831e-06	2.85887e-06	0.021254
1897	1.04015e-05	6.99553e-06	4.66369e-06	0.0346717
1898	8.51436e-06	5.72633e-06	3.81755e-06	0.0283812
1899	4.36952e-06	2.93871e-06	1.95914e-06	0.0145651
1900	1.43923e-05	9.67952e-06	6.45301e-06	0.0479743
1901	1.01014e-05	6.79368e-06	4.52912e-06	0.0336713
1902	1.49074e-05	1.0026e-05	6.68397e-06	0.0496913
1903	7.58926e-06	5.10415e-06	3.40277e-06	0.0252975
1904	1.74956e-05	1.17666e-05	7.84442e-06	0.0583186
1905	1.83859e-05	1.23654e-05	8.24362e-06	0.0612864
1906	1.06924e-05	7.19115e-06	4.7941e-06	0.0356413
1907	1.35892e-05	9.13941e-06	6.09294e-06	0.0452974
1908	7.95814e-06	5.35224e-06	3.56816e-06	0.0265271
1909	1.37494e-05	9.24716e-06	6.16477e-06	0.0458314
1910	2.99192e-05	2.01221e-05	1.34147e-05	0.0997306
1911	7.14585e-06	4.80593e-06	3.20396e-06	0.0238195
1912	8.90101e-06	5.98636e-06	3.99091e-06	0.02967
1913	8.24926e-06	5.54803e-06	3.69869e-06	0.0274975
1914	1.66948e-05	1.12281e-05	7.4854e-06	0.0556495
1915	6.52214e-06	4.38646e-06	2.92431e-06	0.0217405
1916	1.34191e-05	9.025e-06	6.01667e-06	0.0447303
1917	1.46562e-05	9.85701e-06	6.57134e-06	0.048854
1918	6.26764e-06	4.2153e-06	2.8102e-06	0.0208921
1919	6.43638e-06	4.32878e-06	2.88586e-06	0.0214546
1920	9.32896e-06	6.27418e-06	4.18279e-06	0.0310965
1921	1.00106e-05	6.73262e-06	4.48842e-06	0.0333687
1922	1.14561e-05	7.70476e-06	5.13651e-06	0.0381869
1923	1.24516e-05	8.37432e-06	5.58288e-06	0.0415054
1924	8.23497e-06	5.53842e-06	3.69228e-06	0.0274499
1925	7.76195e-06	5.22029e-06	3.4802e-06	0.0258732
1926	2.10264e-05	1.41413e-05	9.42752e-06	0.070088
1927	1.16553e-05	7.83877e-06	5.22585e-06	0.0388511
1928	1.29616e-05	8.71729e-06	5.81152e-06	0.0432052
1929	1.04219e-05	7.00925e-06	4.67284e-06	0.0347397
1930	8.91233e-06	5.99398e-06	3.99598e-06	0.0297078
1931	2.54747e-05	1.7133e-05	1.1422e-05	0.0849155
1932	1.00996e-05	6.79246e-06	4.52831e-06	0.0336652
1933	9.09334e-06	6.11572e-06	4.07714e-06	0.0303111
1934	2.35388e-05	1.5831e-05	1.0554e-05	0.0784626
1935	8.33779e-06	5.60757e-06	3.73838e-06	0.0277926
1936	4.2284e-06	2.84381e-06	1.89587e-06	0.0140947
1937	6.14862e-06	4.13525e-06	2.75683e-06	0.0204954
1938	5.01597e-06	3.37348e-06	2.24899e-06	0.0167199
1939	6.72275e-06	4.52138e-06	3.01425e-06	0.0224092
1940	1.5485e-05	1.04144e-05	6.94295e-06	0.0516167
1941	1.0526e-05	7.07927e-06	4.71951e-06	0.0350867
1942	2.24564e-05	1.5103e-05	1.00687e-05	0.0748546
1943	1.89488e-05	1.2744e-05	8.49598e-06	0.0631625
1944	8.34335e-06	5.61131e-06	3.74087e-06	0.0278112
1945	7.25007e-06	4.87603e-06	3.25069e-06	0.0241669
1946	9.53737e-06	6.41435e-06	4.27623e-06	0.0317912
1947	2.22521e-05	1.49656e-05	9.97706e-06	0.0741735
1948	2.13118e-05	1.43332e-05	9.55548e-06	0.0710393
1949	6.91713e-06	4.65211e-06	3.10141e-06	0.0230571
1950	1.55063e-05	1.04288e-05	6.95252e-06	0.0516878
1951	9.09696e-06	6.11815e-06	4.07877e-06	0.0303232
1952	6.83279e-06	4.59538e-06	3.06359e-06	0.022776
1953	1.60826e-05	1.08163e-05	7.2109e-06	0.0536087
1954	8.41218e-06	5.6576e-06	3.77174e-06	0.0280406
1955	9.95009e-06	6.69192e-06	4.46128e-06	0.033167
1956	9.70235e-06	6.52531e-06	4.3502e-06	0.0323412
1957	1.39128e-05	9.35704e-06	6.23803e-06	0.046376
1958	1.13509e-05	7.63402e-06	5.08935e-06	0.0378363
1959	7.13579e-06	4.79917e-06	3.19944e-06	0.023786
1960	1.1422e-05	7.68186e-06	5.12124e-06	0.0380734
1961	5.39007e-06	3.62509e-06	2.41672e-06	0.0179669
1962	7.59719e-06	5.10948e-06	3.40632e-06	0.025324
1963	9.18557e-06	6.17775e-06	4.1185e-06	0.0306186
1964	1.66491e-05	1.11974e-05	7.4649e-06	0.0554971
1965	5.78574e-06	3.89119e-06	2.59413e-06	0.0192858
1966	6.02925e-06	4.05497e-06	2.70331e-06	0.0200975
1967	1.56641e-05	1.05349e-05	7.02327e-06	0.0522138
1968	7.57349e-06	5.09355e-06	3.3957e-06	0.025245
1969	1.43547e-05	9.65425e-06	6.43617e-06	0.0478491
1970	1.02883e-05	6.9194e-06	4.61293e-06	0.0342944
1971	1.50246e-05	1.01048e-05	6.73652e-06	0.050082
1972	1.54094e-05	1.03635e-05	6.90903e-06	0.0513645
1973	6.27788e-06	4.22218e-06	2.81479e-06	0.0209263
1974	1.06159e-05	7.13972e-06	4.75981e-06	0.0353864
1975	1.61503e-05	1.08619e-05	7.24125e-06	0.0538344
1976	9.13736e-06	6.14532e-06	4.09688e-06	0.0304579
1977	1.54792e-05	1.04105e-05	6.94036e-06	0.0515974
1978	1.1843e-05	7.96497e-06	5.30998e-06	0.0394765
1979	8.6911e-06	5.84519e-06	3.8968e-06	0.0289703
1980	6.49113e-06	4.3656e-06	2.9104e-06	0.0216371
1981	6.12486e-06	4.11927e-06	2.74618e-06	0.0204162
1982	1.2822e-05	8.62343e-06	5.74895e-06	0.04274
1983	1.55704e-05	1.04718e-05	6.98123e-06	0.0519013
1984	8.02265e-06	5.39563e-06	3.59709e-06	0.0267422
1985	1.28428e-05	8.63742e-06	5.75828e-06	0.0428094
1986	9.62814e-06	6.4754e-06	4.31693e-06	0.0320938
1987	1.16884e-05	7.861e-06	5.24066e-06	0.0389612
1988	1.02732e-05	6.90923e-06	4.60615e-06	0.034244
1989	2.00042e-05	1.34538e-05	8.96919e-06	0.0666805
1990	1.0196e-05	6.85732e-06	4.57155e-06	0.0339867
1991	6.95023e-06	4.67437e-06	3.11625e-06	0.0231674
1992	1.0403e-05	6.99651e-06	4.66434e-06	0.0346766
1993	1.47523e-05	9.92167e-06	6.61444e-06	0.0491744
1994	1.49386e-05	1.00469e-05	6.69794e-06	0.0497952
1995	1.23688e-05	8.31862e-06	5.54575e-06	0.0412293
1996	8.5654e-06	5.76065e-06	3.84044e-06	0.0285513
1997	9.00768e-06	6.05811e-06	4.03874e-06	0.0300256
1998	2.00113e-05	1.34586e-05	8.97238e-06	0.0667042
1999	1.01583e-05	6.83194e-06	4.55462e-06	0.0338609
[truncated: 8,001 more rows]
