# Supplementary material for: Health risk assessment from habitants of Araró, Michoacán, México, exposed to arsenic by dust, using Monte Carlo probabilistic method
Source: PeerJ. 2025 Jun 10;13:e18805. doi: 10.7717/peerj.18805 (PMC12164815; doi:10.7717/peerj.18805)
Supplement: Supplemental Information 12 [file peerj-13-18805-s012.xlsx]

## Sheet: Risk Premises
Study Title:	Dermico premisas simulación.					Last simulation run:
Study File:	Dermico premisas simulación.xlsx					2022-11-04 20:30:22
	Output Cells	Histogram settings				Multi-cell output range names
Description for Reports	Range Names	Min value	Max value	Step size		title row or column (optional)
	ADD	Auto	Auto	Auto
	ADDc	Auto	Auto	Auto
	CR	Auto	Auto	Auto
	HQ	Auto	Auto	Auto
		Study	Min				Max
	Input Cells	File	Allowed		Expected		Allowed
Description for Reports	Range Names	Values	Values	10/90	Values	90/10	Values	Distributions	Parameters and chart settings
	BW	16.31	5.8	11.0965	16.3774	21.6424	39	Normal	Mean	16.31	std dev	4.15	X Axis Min	auto	X Axis Max	auto
	Conc	15.6	5.94	10.1171	15.7996	21.5085	42.53	Normal	Mean	15.6	std dev	4.57375	X Axis Min	auto	X Axis Max	auto
	ED	3.51	2	3.02944	3.50999	3.99077	5	Normal	Mean	3.51	std dev	0.375	X Axis Min	auto	X Axis Max	auto

## Sheet: Simulation Summary
	10000	Simulations run
					Change in expected values as simulations increase									Change in standard deviation as simulations increase
	Minimum result	Maximum result	Expected value	Std deviation	125	250	500	1000	2000	4000	8000	10000		125	250	500	1000	2000	4000	8000	10000
ADD	1.19247e-05	0.000255993	6.57769e-05	2.83424e-05	-	-0.00223723	0.0387246	-0.0134252	-0.00138226	0.000330925	0.00118799	-0.000283656		-	-0.0469291	0.072153	-0.0225871	0.0488763	0.00306694	-0.00427749	-0.00420299
ADDc	5.74724e-07	1.23379e-05	3.17019e-06	1.36599e-06	-	-0.00223723	0.0387246	-0.0134252	-0.00138226	0.000330925	0.00118799	-0.000283656		-	-0.0469291	0.072153	-0.0225871	0.0488763	0.00306694	-0.00427749	-0.00420299
CR	3.8315e-07	8.22525e-06	2.11346e-06	9.10661e-07	-	-0.00223723	0.0387246	-0.0134252	-0.00138226	0.000330925	0.00118799	-0.000283656		-	-0.0469291	0.072153	-0.0225871	0.0488763	0.00306694	-0.00427749	-0.00420299
HQ	0.039749	0.853311	0.219256	0.0944746	-	-0.00223723	0.0387246	-0.0134252	-0.00138226	0.000330925	0.00118799	-0.000283656		-	-0.0469291	0.072153	-0.0225871	0.0488763	0.00306694	-0.00427749	-0.00420299

## Sheet: Simulation variance
This worksheet shows the convergence of the output variables as a function of the number of simulations
You should run enough simulations until the % change is very small, typically < 1.0%
ADD
	# of Sims	125	250	500	1000	2000	4000	8000	10000
	Avg Value	6.43399e-05	6.41959e-05	6.66819e-05	6.57867e-05	6.56957e-05	6.57175e-05	6.57955e-05	6.57769e-05
	% Chg		-0.00223723	0.0387246	-0.0134252	-0.00138226	0.000330925	0.00118799	-0.000283656
	Std Dev.	2.72027e-05	2.59261e-05	2.77968e-05	2.71689e-05	2.84969e-05	2.85843e-05	2.8462e-05	2.83424e-05
	% Chg		-0.0469291	0.072153	-0.0225871	0.0488763	0.00306694	-0.00427749	-0.00420299
ADDc
	# of Sims	125	250	500	1000	2000	4000	8000	10000
	Avg Value	3.10093e-06	3.09399e-06	3.2138e-06	3.17066e-06	3.16628e-06	3.16732e-06	3.17109e-06	3.17019e-06
	% Chg		-0.00223723	0.0387246	-0.0134252	-0.00138226	0.000330925	0.00118799	-0.000283656
	Std Dev.	1.31107e-06	1.24954e-06	1.3397e-06	1.30944e-06	1.37344e-06	1.37765e-06	1.37176e-06	1.36599e-06
	% Chg		-0.0469291	0.072153	-0.0225871	0.0488763	0.00306694	-0.00427749	-0.00420299
CR
	# of Sims	125	250	500	1000	2000	4000	8000	10000
	Avg Value	2.06729e-06	2.06266e-06	2.14254e-06	2.11377e-06	2.11085e-06	2.11155e-06	2.11406e-06	2.11346e-06
	% Chg		-0.00223723	0.0387246	-0.0134252	-0.00138226	0.000330925	0.00118799	-0.000283656
	Std Dev.	8.74044e-07	8.33026e-07	8.93131e-07	8.72958e-07	9.15625e-07	9.18433e-07	9.14504e-07	9.10661e-07
	% Chg		-0.0469291	0.072153	-0.0225871	0.0488763	0.00306694	-0.00427749	-0.00420299
HQ
	# of Sims	125	250	500	1000	2000	4000	8000	10000
	Avg Value	0.214466	0.213986	0.222273	0.219289	0.218986	0.219058	0.219318	0.219256
	% Chg		-0.00223723	0.0387246	-0.0134252	-0.00138226	0.000330925	0.00118799	-0.000283656
	Std Dev.	0.0906758	0.0864205	0.092656	0.0905632	0.0949895	0.0952809	0.0948733	0.0944746
	% Chg		-0.0469291	0.072153	-0.0225871	0.0488763	0.00306694	-0.00427749	-0.00420299

## Sheet: ADD Results
ADD Results
Minimum result	1.19247e-05				6.08066e-05	Study value
Maximum result	0.000255993				0.4992	of results are equal or lower
Expected value	6.57769e-05				0.5008	of results are equal or greater
Std Deviation	2.83424e-05
Out of 10000 simulations		Of those with numeric values:
10000 had numeric values.			5% <=	3.02981e-05
0 had error values.			10% <=	3.56107e-05
			15% <=	3.94678e-05
			20% <=	4.29021e-05
			25% <=	4.58637e-05
			30% <=	4.90336e-05
			35% <=	5.20219e-05
			40% <=	5.5042e-05
			45% <=	5.78304e-05
			50% <=	6.08646e-05
			55% <=	6.37635e-05
			60% <=	6.70117e-05
			65% <=	7.08077e-05
			70% <=	7.47115e-05
			75% <=	7.92439e-05
			80% <=	8.4822e-05
			85% <=	9.16166e-05
			90% <=	0.000101103
			95% <=	0.000117851
			100% <=	0.000255993
If ADD is:				6.08066e-05	0.4992	of results are equal or lower
(Chg to do what ifs)					0.5008	of results are greater
					Cumulative				Cumulative
ADD	frequency:				frequency:				frequency:
<=1.19247E-05	1	0.0001		<=1.19247E-05	1	0.0001		=>1.19247E-05	10000	1
1.19247E-05 to 2.47704E-05	166	0.0166		<=2.47704E-05	167	0.0167		=>2.47704E-05	9833	0.9833
2.47704E-05 to 3.76161E-05	1096	0.1096		<=3.76161E-05	1263	0.1263		=>3.76161E-05	8737	0.8737
3.76161E-05 to 5.04619E-05	1967	0.1967		<=5.04619E-05	3230	0.323		=>5.04619E-05	6770	0.677
5.04619E-05 to 6.33076E-05	2196	0.2196		<=6.33076E-05	5426	0.5426		=>6.33076E-05	4574	0.4574
6.33076E-05 to 7.61533E-05	1747	0.1747		<=7.61533E-05	7173	0.7173		=>7.61533E-05	2827	0.2827
7.61533E-05 to 8.8999E-05	1150	0.115		<=8.8999E-05	8323	0.8323		=>8.8999E-05	1677	0.1677
8.8999E-05 to 0.000101845	709	0.0709		<=0.000101845	9032	0.9032		=>0.000101845	968	0.0968
0.000101845 to 0.00011469	404	0.0404		<=0.00011469	9436	0.9436		=>0.00011469	564	0.0564
0.00011469 to 0.000127536	210	0.021		<=0.000127536	9646	0.9646		=>0.000127536	354	0.0354
0.000127536 to 0.000140382	123	0.0123		<=0.000140382	9769	0.9769		=>0.000140382	231	0.0231
0.000140382 to 0.000153228	93	0.0093		<=0.000153228	9862	0.9862		=>0.000153228	138	0.0138
0.000153228 to 0.000166073	57	0.0057		<=0.000166073	9919	0.9919		=>0.000166073	81	0.0081
0.000166073 to 0.000178919	32	0.0032		<=0.000178919	9951	0.9951		=>0.000178919	49	0.0049
0.000178919 to 0.000191765	15	0.0015		<=0.000191765	9966	0.9966		=>0.000191765	34	0.0034
0.000191765 to 0.00020461	12	0.0012		<=0.00020461	9978	0.9978		=>0.00020461	22	0.0022
0.00020461 to 0.000217456	9	0.0009		<=0.000217456	9987	0.9987		=>0.000217456	13	0.0013
0.000217456 to 0.000230302	5	0.0005		<=0.000230302	9992	0.9992		=>0.000230302	8	0.0008
0.000230302 to 0.000243148	6	0.0006		<=0.000243148	9998	0.9998		=>0.000243148	2	0.0002
0.000243148 to 0.000255993	2	0.0002		<=0.000255993	10000	1		=>0.000255993	1	0.0001
>0.000255993	0	0
Bin Size	1.28457e-05
Number of bins	21
# of Sims	Avg Value	% Chg		Std Dev.	% Chg
125	6.43399e-05			2.72027e-05
250	6.41959e-05	-0.00223723		2.59261e-05	-0.0469291
500	6.66819e-05	0.0387246		2.77968e-05	0.072153
1000	6.57867e-05	-0.0134252		2.71689e-05	-0.0225871
2000	6.56957e-05	-0.00138226		2.84969e-05	0.0488763
4000	6.57175e-05	0.000330925		2.85843e-05	0.00306694
8000	6.57955e-05	0.00118799		2.8462e-05	-0.00427749
10000	6.57769e-05	-0.000283656		2.83424e-05	-0.00420299

## Sheet: ADDc Results
ADDc Results
Minimum result	5.74724e-07				2.93064e-06	Study value
Maximum result	1.23379e-05				0.4992	of results are equal or lower
Expected value	3.17019e-06				0.5008	of results are equal or greater
Std Deviation	1.36599e-06
Out of 10000 simulations		Of those with numeric values:
10000 had numeric values.			5% <=	1.46025e-06
0 had error values.			10% <=	1.7163e-06
			15% <=	1.90219e-06
			20% <=	2.06771e-06
			25% <=	2.21045e-06
			30% <=	2.36323e-06
			35% <=	2.50725e-06
			40% <=	2.65281e-06
			45% <=	2.7872e-06
			50% <=	2.93343e-06
			55% <=	3.07315e-06
			60% <=	3.2297e-06
			65% <=	3.41265e-06
			70% <=	3.6008e-06
			75% <=	3.81924e-06
			80% <=	4.08809e-06
			85% <=	4.41556e-06
			90% <=	4.87276e-06
			95% <=	5.67998e-06
			100% <=	1.23379e-05
If ADDc is:				2.93064e-06	0.4992	of results are equal or lower
(Chg to do what ifs)					0.5008	of results are greater
					Cumulative				Cumulative
ADDc	frequency:				frequency:				frequency:
<=5.74724E-07	1	0.0001		<=5.74724E-07	1	0.0001		=>5.74724E-07	10000	1
5.74724E-07 to 1.19384E-06	166	0.0166		<=1.19384E-06	167	0.0167		=>1.19384E-06	9833	0.9833
1.19384E-06 to 1.81295E-06	1096	0.1096		<=1.81295E-06	1263	0.1263		=>1.81295E-06	8737	0.8737
1.81295E-06 to 2.43206E-06	1967	0.1967		<=2.43206E-06	3230	0.323		=>2.43206E-06	6770	0.677
2.43206E-06 to 3.05118E-06	2196	0.2196		<=3.05118E-06	5426	0.5426		=>3.05118E-06	4574	0.4574
3.05118E-06 to 3.67029E-06	1747	0.1747		<=3.67029E-06	7173	0.7173		=>3.67029E-06	2827	0.2827
3.67029E-06 to 4.2894E-06	1150	0.115		<=4.2894E-06	8323	0.8323		=>4.2894E-06	1677	0.1677
4.2894E-06 to 4.90852E-06	709	0.0709		<=4.90852E-06	9032	0.9032		=>4.90852E-06	968	0.0968
4.90852E-06 to 5.52763E-06	404	0.0404		<=5.52763E-06	9436	0.9436		=>5.52763E-06	564	0.0564
5.52763E-06 to 6.14674E-06	210	0.021		<=6.14674E-06	9646	0.9646		=>6.14674E-06	354	0.0354
6.14674E-06 to 6.76586E-06	123	0.0123		<=6.76586E-06	9769	0.9769		=>6.76586E-06	231	0.0231
6.76586E-06 to 7.38497E-06	93	0.0093		<=7.38497E-06	9862	0.9862		=>7.38497E-06	138	0.0138
7.38497E-06 to 8.00408E-06	57	0.0057		<=8.00408E-06	9919	0.9919		=>8.00408E-06	81	0.0081
8.00408E-06 to 8.62319E-06	32	0.0032		<=8.62319E-06	9951	0.9951		=>8.62319E-06	49	0.0049
8.62319E-06 to 9.24231E-06	15	0.0015		<=9.24231E-06	9966	0.9966		=>9.24231E-06	34	0.0034
9.24231E-06 to 9.86142E-06	12	0.0012		<=9.86142E-06	9978	0.9978		=>9.86142E-06	22	0.0022
9.86142E-06 to 1.04805E-05	9	0.0009		<=1.04805E-05	9987	0.9987		=>1.04805E-05	13	0.0013
1.04805E-05 to 1.10996E-05	5	0.0005		<=1.10996E-05	9992	0.9992		=>1.10996E-05	8	0.0008
1.10996E-05 to 1.17188E-05	6	0.0006		<=1.17188E-05	9998	0.9998		=>1.17188E-05	2	0.0002
1.17188E-05 to 1.23379E-05	2	0.0002		<=1.23379E-05	10000	1		=>1.23379E-05	1	0.0001
>1.23379E-05	0	0
Bin Size	6.19113e-07
Number of bins	21
# of Sims	Avg Value	% Chg		Std Dev.	% Chg
125	3.10093e-06			1.31107e-06
250	3.09399e-06	-0.00223723		1.24954e-06	-0.0469291
500	3.2138e-06	0.0387246		1.3397e-06	0.072153
1000	3.17066e-06	-0.0134252		1.30944e-06	-0.0225871
2000	3.16628e-06	-0.00138226		1.37344e-06	0.0488763
4000	3.16732e-06	0.000330925		1.37765e-06	0.00306694
8000	3.17109e-06	0.00118799		1.37176e-06	-0.00427749
10000	3.17019e-06	-0.000283656		1.36599e-06	-0.00420299

## Sheet: CR Results
CR Results
Minimum result	3.8315e-07				1.95376e-06	Study value
Maximum result	8.22525e-06				0.4992	of results are equal or lower
Expected value	2.11346e-06				0.5008	of results are equal or greater
Std Deviation	9.10661e-07
Out of 10000 simulations		Of those with numeric values:
10000 had numeric values.			5% <=	9.73501e-07
0 had error values.			10% <=	1.1442e-06
			15% <=	1.26813e-06
			20% <=	1.37848e-06
			25% <=	1.47363e-06
			30% <=	1.57549e-06
			35% <=	1.6715e-06
			40% <=	1.76854e-06
			45% <=	1.85813e-06
			50% <=	1.95562e-06
			55% <=	2.04877e-06
			60% <=	2.15313e-06
			65% <=	2.2751e-06
			70% <=	2.40053e-06
			75% <=	2.54616e-06
			80% <=	2.72539e-06
			85% <=	2.94371e-06
			90% <=	3.24851e-06
			95% <=	3.78665e-06
			100% <=	8.22525e-06
If CR is:				1.95376e-06	0.4992	of results are equal or lower
(Chg to do what ifs)					0.5008	of results are greater
					Cumulative				Cumulative
CR	frequency:				frequency:				frequency:
<=3.8315E-07	1	0.0001		<=3.8315E-07	1	0.0001		=>3.8315E-07	10000	1
3.8315E-07 to 7.95892E-07	166	0.0166		<=7.95892E-07	167	0.0167		=>7.95892E-07	9833	0.9833
7.95892E-07 to 1.20863E-06	1096	0.1096		<=1.20863E-06	1263	0.1263		=>1.20863E-06	8737	0.8737
1.20863E-06 to 1.62138E-06	1967	0.1967		<=1.62138E-06	3230	0.323		=>1.62138E-06	6770	0.677
1.62138E-06 to 2.03412E-06	2196	0.2196		<=2.03412E-06	5426	0.5426		=>2.03412E-06	4574	0.4574
2.03412E-06 to 2.44686E-06	1747	0.1747		<=2.44686E-06	7173	0.7173		=>2.44686E-06	2827	0.2827
2.44686E-06 to 2.8596E-06	1150	0.115		<=2.8596E-06	8323	0.8323		=>2.8596E-06	1677	0.1677
2.8596E-06 to 3.27234E-06	709	0.0709		<=3.27234E-06	9032	0.9032		=>3.27234E-06	968	0.0968
3.27234E-06 to 3.68509E-06	404	0.0404		<=3.68509E-06	9436	0.9436		=>3.68509E-06	564	0.0564
3.68509E-06 to 4.09783E-06	210	0.021		<=4.09783E-06	9646	0.9646		=>4.09783E-06	354	0.0354
4.09783E-06 to 4.51057E-06	123	0.0123		<=4.51057E-06	9769	0.9769		=>4.51057E-06	231	0.0231
4.51057E-06 to 4.92331E-06	93	0.0093		<=4.92331E-06	9862	0.9862		=>4.92331E-06	138	0.0138
4.92331E-06 to 5.33605E-06	57	0.0057		<=5.33605E-06	9919	0.9919		=>5.33605E-06	81	0.0081
5.33605E-06 to 5.7488E-06	32	0.0032		<=5.7488E-06	9951	0.9951		=>5.7488E-06	49	0.0049
5.7488E-06 to 6.16154E-06	15	0.0015		<=6.16154E-06	9966	0.9966		=>6.16154E-06	34	0.0034
6.16154E-06 to 6.57428E-06	12	0.0012		<=6.57428E-06	9978	0.9978		=>6.57428E-06	22	0.0022
6.57428E-06 to 6.98702E-06	9	0.0009		<=6.98702E-06	9987	0.9987		=>6.98702E-06	13	0.0013
6.98702E-06 to 7.39976E-06	5	0.0005		<=7.39976E-06	9992	0.9992		=>7.39976E-06	8	0.0008
7.39976E-06 to 7.81251E-06	6	0.0006		<=7.81251E-06	9998	0.9998		=>7.81251E-06	2	0.0002
7.81251E-06 to 8.22525E-06	1	0.0001		<=8.22525E-06	9999	0.9999		=>8.22525E-06	1	0.0001
>8.22525E-06	1	0.0001
Bin Size	4.12742e-07
Number of bins	21
# of Sims	Avg Value	% Chg		Std Dev.	% Chg
125	2.06729e-06			8.74044e-07
250	2.06266e-06	-0.00223723		8.33026e-07	-0.0469291
500	2.14254e-06	0.0387246		8.93131e-07	0.072153
1000	2.11377e-06	-0.0134252		8.72958e-07	-0.0225871
2000	2.11085e-06	-0.00138226		9.15625e-07	0.0488763
4000	2.11155e-06	0.000330925		9.18433e-07	0.00306694
8000	2.11406e-06	0.00118799		9.14504e-07	-0.00427749
10000	2.11346e-06	-0.000283656		9.10661e-07	-0.00420299

## Sheet: HQ Results
HQ Results
Minimum result	0.039749				0.202689	Study value
Maximum result	0.853311				0.4992	of results are equal or lower
Expected value	0.219256				0.5008	of results are equal or greater
Std Deviation	0.0944746
Out of 10000 simulations		Of those with numeric values:
10000 had numeric values.			5% <=	0.100994
0 had error values.			10% <=	0.118702
			15% <=	0.131559
			20% <=	0.143007
			25% <=	0.152879
			30% <=	0.163445
			35% <=	0.173406
			40% <=	0.183473
			45% <=	0.192768
			50% <=	0.202882
			55% <=	0.212545
			60% <=	0.223372
			65% <=	0.236026
			70% <=	0.249038
			75% <=	0.264146
			80% <=	0.28274
			85% <=	0.305389
			90% <=	0.337009
			95% <=	0.392838
			100% <=	0.853311
If HQ is:				0.202689	0.4992	of results are equal or lower
(Chg to do what ifs)					0.5008	of results are greater
					Cumulative				Cumulative
HQ	frequency:				frequency:				frequency:
<=0.039749038	1	0.0001		<=0.039749038	1	0.0001		=>0.039749038	10000	1
0.039749038 to 0.08256809	166	0.0166		<=0.08256809	167	0.0167		=>0.08256809	9833	0.9833
0.08256809 to 0.125387141	1096	0.1096		<=0.125387141	1263	0.1263		=>0.125387141	8737	0.8737
0.125387141 to 0.168206193	1967	0.1967		<=0.168206193	3230	0.323		=>0.168206193	6770	0.677
0.168206193 to 0.211025245	2196	0.2196		<=0.211025245	5426	0.5426		=>0.211025245	4574	0.4574
0.211025245 to 0.253844297	1747	0.1747		<=0.253844297	7173	0.7173		=>0.253844297	2827	0.2827
0.253844297 to 0.296663348	1150	0.115		<=0.296663348	8323	0.8323		=>0.296663348	1677	0.1677
0.296663348 to 0.3394824	709	0.0709		<=0.3394824	9032	0.9032		=>0.3394824	968	0.0968
0.3394824 to 0.382301452	404	0.0404		<=0.382301452	9436	0.9436		=>0.382301452	564	0.0564
0.382301452 to 0.425120504	210	0.021		<=0.425120504	9646	0.9646		=>0.425120504	354	0.0354
0.425120504 to 0.467939555	123	0.0123		<=0.467939555	9769	0.9769		=>0.467939555	231	0.0231
0.467939555 to 0.510758607	93	0.0093		<=0.510758607	9862	0.9862		=>0.510758607	138	0.0138
0.510758607 to 0.553577659	57	0.0057		<=0.553577659	9919	0.9919		=>0.553577659	81	0.0081
0.553577659 to 0.59639671	32	0.0032		<=0.59639671	9951	0.9951		=>0.59639671	49	0.0049
0.59639671 to 0.639215762	15	0.0015		<=0.639215762	9966	0.9966		=>0.639215762	34	0.0034
0.639215762 to 0.682034814	12	0.0012		<=0.682034814	9978	0.9978		=>0.682034814	22	0.0022
0.682034814 to 0.724853866	9	0.0009		<=0.724853866	9987	0.9987		=>0.724853866	13	0.0013
0.724853866 to 0.767672917	5	0.0005		<=0.767672917	9992	0.9992		=>0.767672917	8	0.0008
0.767672917 to 0.810491969	6	0.0006		<=0.810491969	9998	0.9998		=>0.810491969	2	0.0002
0.810491969 to 0.853311021	2	0.0002		<=0.853311021	10000	1		=>0.853311021	1	0.0001
>0.853311021	0	0
Bin Size	0.0428191
Number of bins	21
# of Sims	Avg Value	% Chg		Std Dev.	% Chg
125	0.214466			0.0906758
250	0.213986	-0.00223723		0.0864205	-0.0469291
500	0.222273	0.0387246		0.092656	0.072153
1000	0.219289	-0.0134252		0.0905632	-0.0225871
2000	0.218986	-0.00138226		0.0949895	0.0488763
4000	0.219058	0.000330925		0.0952809	0.00306694
8000	0.219318	0.00118799		0.0948733	-0.00427749
10000	0.219256	-0.000283656		0.0944746	-0.00420299

## Sheet: Simulation Input Values 1
Sim #	BW	Conc	ED
1	19.8623	8.10223	3.59588
2	17.0305	15.9026	4.02208
3	12.1634	17.2238	3.24876
4	13.3246	6.7947	3.8012
5	20.1624	18.2755	3.11374
6	23.5317	22.8108	3.66
7	18.6614	14.2227	3.54242
8	16.8406	12.7241	3.28159
9	16.2568	7.1358	4.3082
10	21.1521	17.1749	4.27339
11	14.0497	18.6493	3.95615
12	22.0668	17.7369	3.23636
13	18.978	17.4651	3.78902
14	13.6838	25.0133	3.18133
15	18.0869	13.9546	3.61109
16	20.0985	15.6874	3.98545
17	9.51976	16.2777	3.33308
18	17.6456	17.1283	3.78878
19	10.3031	14.8132	3.2568
20	9.8032	7.08298	3.36922
21	14.7254	14.4602	3.32271
22	20.6233	10.2771	3.55981
23	18.6392	13.4075	4.11192
24	18.1968	19.7207	3.88677
25	11.0932	12.2798	3.29923
26	13.3755	18.4462	3.09808
27	15.9545	13.1782	2.76015
28	11.4708	11.6566	3.31934
29	18.1682	14.5032	3.97605
30	19.9864	16.6968	3.57092
31	21.4005	17.3209	3.92366
32	18.2827	29.2236	3.16906
33	22.3804	18.5202	3.36084
34	20.5994	8.09273	3.25269
35	15.7774	21.6526	2.7528
36	11.9705	16.1431	3.46594
37	11.2251	23.2098	3.16144
38	18.3948	12.7195	3.07928
39	28.2754	15.037	3.57291
40	18.8994	20.9386	4.1054
41	22.6289	13.608	3.21506
42	19.6346	9.23721	3.03732
43	16.5045	12.8194	3.71436
44	13.5796	12.2839	3.92282
45	23.5698	17.3932	3.86203
46	25.7637	10.6293	3.72123
47	11.0534	7.07889	3.64828
48	16.8143	19.3716	3.61573
49	12.5442	13.8483	3.40134
50	10.8406	12.0442	2.8443
51	12.6107	13.9356	3.68537
52	11.8431	17.5472	3.8398
53	21.8434	22.9476	2.77754
54	17.9302	20.6481	3.9596
55	8.81153	14.354	3.58628
56	12.4337	9.83703	3.62281
57	20.814	18.1546	3.6142
58	13.3815	11.8569	3.49006
59	17.2078	11.4488	3.58526
60	7.24163	12.7287	3.54256
61	17.3536	24.4152	3.59131
62	13.2809	19.0348	3.97691
63	19.0282	12.5346	3.50104
64	18.1923	20.4132	3.83724
65	15.3438	14.5023	3.47702
66	20.0887	9.61901	3.45194
67	14.4519	16.7069	4.04787
68	18.7771	14.5088	3.8331
69	12.9314	14.2427	3.11716
70	18.1415	16.6716	3.54729
71	27.3884	14.6917	3.70552
72	15.2018	11.0264	2.28742
73	6.83194	16.2655	3.62429
74	7.41561	6.07756	3.62804
75	15.3471	22.8548	3.61106
76	30.9859	10.0555	3.58624
77	18.4244	25.6844	3.65117
78	19.0874	10.4937	3.03427
79	13.7001	12.4593	3.8727
80	18.0792	19.9212	2.90647
81	12.373	16.9703	3.33293
82	19.5822	16.9756	3.61246
83	17.4445	14.3192	3.63912
84	14.3024	15.2507	3.04826
85	19.9803	6.82024	3.89368
86	18.212	12.6687	3.48698
87	14.9015	19.014	3.26213
88	21.7108	9.94341	3.73474
89	11.3622	14.4512	3.61788
90	15.9791	14.0128	3.49142
91	12.1395	18.5149	3.02312
92	21.7523	12.6983	3.5395
93	17.7786	18.951	3.47634
94	19.8998	14.7401	3.85184
95	14.4215	14.8722	3.12294
96	9.18273	18.0087	3.4283
97	12.0604	15.4695	3.26821
98	14.1365	8.30154	3.36169
99	13.413	22.4684	3.66356
100	13.8392	15.3988	3.39353
101	10.536	25.5397	3.67313
102	11.6274	10.8782	2.92056
103	20.8114	16.3744	2.85542
104	8.64273	12.6502	3.66169
105	12.2619	18.3789	3.21518
106	21.757	13.4305	3.86232
107	16.3226	16.3055	2.93875
108	18.4304	19.806	2.95824
109	15.0308	15.2664	3.58704
110	19.4904	16.0635	3.39882
111	21.7173	21.0173	3.27776
112	14.5522	21.2377	3.63909
113	11.3122	18.4386	3.11131
114	19.7827	9.89	3.56335
115	16.5671	13.81	3.63806
116	18.4663	11.3227	3.43524
117	17.2853	15.9864	3.79884
118	16.5752	19.0522	3.76512
119	10.5647	26.18	3.51618
120	15.6177	17.4343	3.67119
121	16.7494	14.2025	4.00868
122	21.3118	11.7981	3.69484
123	14.7943	17.4804	3.78485
124	17.2025	10.7161	3.09091
125	11.35	15.5661	3.81389
126	13.9499	16.9203	3.40077
127	13.2805	21.2105	3.2665
128	14.385	8.73464	3.72033
129	10.0936	13.3902	2.97494
130	23.7566	18.2577	3.4062
131	27.7475	14.9741	4.04119
132	16.5933	13.1555	3.14995
133	12.8237	16.7404	3.61513
134	21.4916	12.8239	3.96809
135	16.0306	13.8612	2.63818
136	17.2547	20.848	3.96163
137	15.7445	14.6844	3.21875
138	17.301	13.784	3.97845
139	16.6098	18.2916	2.85129
140	20.3268	21.4299	3.31194
141	16.2976	10.585	3.19052
142	8.6146	17.5468	3.81498
143	7.77122	14.9771	2.78501
144	11.925	21.297	3.28376
145	15.7802	14.605	3.7384
146	10.8685	12.5408	3.4654
147	16.5477	12.2425	3.54364
148	19.3765	13.3735	3.95642
149	19.2783	19.3405	3.39586
150	16.5235	16.5597	3.39966
151	18.5027	15.8946	4.02107
152	17.4167	17.3912	2.98867
153	13.7115	18.4546	4.17593
154	14.3249	13.5082	3.53765
155	22.0105	17.8244	3.79104
156	19.09	19.5302	3.63069
157	15.0265	21.7397	3.64079
158	15.5977	13.351	3.32618
159	10.4746	14.5051	3.73862
160	14.0753	17.659	3.25015
161	17.3781	18.8386	3.28881
162	18.2699	19.3106	4.07615
163	19.4554	14.1785	3.39576
164	15.083	6.97496	2.92957
165	13.485	12.9593	2.98728
166	22.0259	21.4663	4.04783
167	17.4461	12.1769	3.55389
168	16.2484	17.0122	3.27821
169	15.5698	9.10697	3.43894
170	15.7112	14.4466	4.06623
171	20.0287	17.6645	3.76426
172	26.6202	15.9886	2.88496
173	13.997	17.4316	4.23645
174	18.4903	17.5515	3.7911
175	11.6099	23.6598	4.14889
176	22.56	19.4355	3.75343
177	16.1684	24.3595	2.86975
178	12.4926	21.7924	3.74593
179	21.264	15.8511	3.55265
180	10.964	12.5793	3.28698
181	22.5459	12.2532	3.20789
182	17.272	17.8424	3.05872
183	15.0012	21.6048	3.56807
184	14.1318	17.39	3.86864
185	19.4656	22.4722	3.14544
186	14.1086	16.7971	2.71492
187	16.0383	22.9566	3.17812
188	22.2505	6.12995	3.77804
189	17.7027	11.1517	3.86782
190	24.3747	13.4079	3.421
191	16.0496	11.5302	3.49536
192	18.8514	12.7411	3.797
193	10.1403	10.9469	3.71868
194	16.6819	18.9237	3.41346
195	13.0745	16.1735	3.386
196	21.5303	7.90593	3.36837
197	14.6732	8.57127	3.52145
198	14.25	17.5051	3.83956
199	15.6843	12.6541	3.91632
200	14.3151	20.6746	3.42068
201	15.2291	7.07622	4.42401
202	15.8534	11.9021	4.14714
203	15.1329	16.1623	3.11324
204	15.7314	12.0677	2.92442
205	16.129	9.06637	3.64401
206	11.0691	17.8848	3.68254
207	15.334	13.7414	3.60575
208	14.3718	16.9273	3.56935
209	18.0525	11.9553	4.13224
210	19.1917	18.2192	3.41414
211	17.3475	14.9753	2.54537
212	18.6502	14.0276	3.27414
213	15.682	25.3663	2.98806
214	19.5908	10.1622	3.494
215	13.3713	16.7172	2.99212
216	17.7402	20.9945	3.6358
217	14.7258	23.8754	3.75328
218	19.0608	11.1265	3.31799
219	17.8025	16.1574	3.52175
220	13.4254	10.2034	3.48587
221	21.634	20.0449	3.34895
222	11.3793	13.9488	3.55163
223	12.7568	19.5575	3.72264
224	15.873	18.8628	3.44789
225	11.0476	18.4389	3.94205
226	16.6683	18.4412	3.31201
227	9.67958	16.8873	4.00616
228	20.0313	17.218	3.72305
229	13.9302	20.7663	3.15203
230	13.8243	14.3325	3.45201
231	9.21386	11.2572	3.41269
232	17.1328	14.3505	2.95279
233	11.5241	14.3305	3.23143
234	26.169	13.3449	3.21776
235	20.3727	10.892	3.09067
236	10.9831	14.5475	2.80031
237	23.6356	15.3094	4.10377
238	18.4617	14.321	3.09516
239	15.0176	14.4971	3.50012
240	15.531	25.3818	3.4125
241	14.4728	18.0533	2.58052
242	18.9798	7.47436	3.56248
243	23.3768	13.6183	3.13595
244	19.0476	24.5644	3.77498
245	18.1287	9.33141	3.59914
246	13.3322	15.4896	3.07234
247	13.3407	13.2055	3.57499
248	14.4496	16.1629	3.86915
249	20.2503	12.3918	4.22438
250	14.3017	14.1451	3.92076
251	17.0762	13.9387	4.11466
252	14.0029	10.3635	3.47099
253	17.5603	16.8173	3.44843
254	7.2229	18.7752	2.78525
255	21.9803	16.679	3.21888
256	14.0209	14.6454	3.46098
257	19.969	13.1273	3.3288
258	13.9062	25.8358	4.34732
259	20.1116	12.6776	3.83209
260	16.4224	16.4294	3.30094
261	11.5539	16.6383	3.4707
262	16.4115	8.91861	3.15586
263	18.4474	9.313	3.73591
264	14.386	11.0922	3.19609
265	10.6895	13.8888	4.18818
266	14.6173	12.8291	3.23725
267	13.8674	19.4072	4.20387
268	12.9435	14.6466	3.44884
269	11.7644	18.0689	3.14891
270	18.6395	24.1061	3.47881
271	14.8443	22.8644	2.99262
272	22.9216	18.1148	3.84598
273	25.525	22.6329	3.93437
274	11.9982	18.9577	3.49729
275	19.7159	22.1727	2.92779
276	6.50375	12.9777	3.54449
277	13.3286	17.9358	3.87142
278	14.3226	20.6904	3.11415
279	18.5136	13.1166	3.43712
280	13.6727	12.4874	3.21533
281	13.1926	14.3336	3.50808
282	19.9738	17.4283	3.71589
283	24.9228	13.2641	3.60223
284	20.9205	19.5398	3.17263
285	12.0203	21.0022	4.34267
286	13.0441	16.5215	3.28316
287	8.22936	18.1229	3.52583
288	15.8615	18.495	2.83078
289	15.4199	14.2805	3.34011
290	15.1241	12.5499	3.45352
291	18.6954	19.4908	3.49519
292	16.9815	10.5788	3.43639
293	13.4661	17.5272	4.06692
294	6.76922	19.6031	3.24521
295	17.978	18.2674	3.29041
296	13.9765	14.4005	3.041
297	16.8606	14.7474	3.36412
298	15.1634	15.8332	3.31337
299	17.8747	25.6222	3.5269
300	13.0006	14.94	3.25509
301	8.58678	6.14275	3.23497
302	16.3471	17.3465	3.27807
303	15.6072	13.3024	3.2732
304	17.2535	12.0013	4.1849
305	16.6168	13.7041	3.58502
306	13.9959	16.2916	3.49583
307	18.2464	17.0638	3.96079
308	19.1176	14.5366	3.05643
309	17.9424	12.0617	3.19366
310	10.5354	21.5988	3.20841
311	15.336	11.1635	3.80134
312	15.7616	13.842	3.63041
313	19.5676	16.1065	4.68465
314	11.2946	12.7939	3.50118
315	12.7562	17.5362	3.45862
316	18.8682	14.685	3.41494
317	13.5936	15.5105	3.83497
318	16.1411	15.917	3.37592
319	15.3318	13.4737	3.37057
320	11.2384	18.0952	2.68109
321	19.0499	19.2176	3.41058
322	9.94812	15.6866	2.7466
323	14.9783	13.4881	3.4076
324	17.6472	6.83901	3.1964
325	16.1438	14.586	3.74846
326	11.4136	20.1504	3.27805
327	17.8849	11.8299	3.39798
328	16.2119	17.751	3.26213
329	8.9588	13.9809	3.82992
330	22.4561	10.4365	4.25796
331	16.7332	12.0483	2.69289
332	14.41	18.6032	3.08309
333	24.7562	16.8567	3.61102
334	17.8374	14.1464	3.87654
335	22.2754	22.5023	2.68568
336	17.7634	17.001	3.8268
337	19.8666	13.7918	3.51112
338	15.055	17.2977	3.34605
339	13.8766	9.82172	3.57019
340	17.0243	20.03	3.96655
341	11.2245	15.3037	3.74049
342	17.4026	27.1171	4.28756
343	25.3122	18.9307	4.25984
344	20.9028	9.10292	3.50674
345	7.16156	13.572	3.22214
346	18.7072	17.2497	3.85437
347	21.0914	16.947	3.62385
348	11.4748	15.7378	3.35023
349	20.1751	17.6082	3.63626
350	22.652	14.2678	3.09904
351	8.46247	16.7591	2.97929
352	13.624	13.313	2.97049
353	23.8288	21.8461	3.65322
354	15.1158	12.978	3.46263
355	20.1092	19.2444	3.59431
356	13.6573	15.0126	4.16394
357	11.9346	16.9986	3.54199
358	15.998	16.3644	3.76463
359	12.9857	15.2872	3.70888
360	12.2329	18.9977	3.66587
361	19.5776	12.1085	4.04082
362	16.0202	19.7104	4.3439
363	14.2009	16.046	3.20574
364	13.8776	12.7536	3.4089
365	18.2317	20.6309	3.43612
366	15.0658	19.2869	3.10255
367	9.99659	13.3364	3.6972
368	17.6589	12.7947	4.05459
369	15.1605	10.4712	3.1951
370	9.84739	15.2211	3.73781
371	12.5537	7.70518	4.30277
372	9.1184	21.7594	3.03521
373	14.3102	18.7313	3.99327
374	5.91605	12.2501	3.38613
375	12.7262	22.8614	3.2228
376	13.4038	13.2909	3.67979
377	10.2059	19.8172	3.45201
378	22.0171	17.8709	3.17651
379	22.1807	25.168	3.18983
380	19.8295	22.1731	3.68364
381	13.353	15.9918	3.42234
382	15.6808	16.4439	4.03842
383	14.3998	18.2818	3.98861
384	18.2795	8.80161	3.6433
385	22.416	15.4984	3.18568
386	20.8102	18.3008	4.31346
387	14.6913	18.6511	3.26859
388	8.47565	15.4743	3.75418
389	13.8107	12.4241	3.34613
390	7.0213	13.5226	3.76887
391	9.53878	13.7034	3.0919
392	13.1076	12.4004	3.26698
393	12.0126	9.46574	3.05694
394	15.8112	14.3886	3.07796
395	23.0223	14.2997	3.53585
396	12.1795	19.4316	3.20869
397	12.4264	10.2653	3.46517
398	21.2365	15.7579	3.30599
399	17.5974	16.4388	3.02351
400	20.2551	14.5005	3.3139
401	22.4918	15.8515	4.34412
402	20.165	19.5542	3.84978
403	17.2809	19.1256	3.9325
404	10.501	17.8645	2.9753
405	15.9	10.0148	3.45629
406	16.6746	11.4557	4.00775
407	15.4321	19.0537	3.23842
408	18.3271	15.8935	3.37577
409	25.7606	10.7416	3.24885
410	12.627	19.7475	4.24049
411	9.46458	10.3771	3.15783
412	17.7293	10.6089	4.01889
413	22.033	13.9309	3.38056
414	13.9447	21.1849	3.43854
415	15.8684	14.1642	3.76363
416	18.1681	15.1716	3.37645
417	9.5054	12.7472	3.46455
418	14.5338	16.2692	3.71707
419	16.0392	15.1665	3.88394
420	11.2924	18.8179	3.38331
421	10.7766	18.1383	3.15343
422	19.4113	11.8653	3.62646
423	21.863	14.2949	3.06524
424	21.0137	15.2081	2.90733
425	14.8579	17.3885	3.85818
426	11.6924	22.0772	3.88499
427	21.9323	10.7993	3.30031
428	19.3332	13.3549	3.67534
429	19.8328	12.1014	3.19956
430	15.9957	12.1625	3.74234
431	17.1079	21.3334	3.57987
432	10.1579	17.6781	3.52806
433	12.6339	5.95926	3.71657
434	8.50423	8.77568	3.40576
435	19.8227	14.0799	3.46195
436	14.0747	11.6411	3.08154
437	17.6876	17.335	3.7045
438	12.423	8.1268	4.09425
439	15.2851	16.3398	3.62682
440	13.5818	17.0155	3.66894
441	14.1497	15.9679	3.03069
442	16.836	22.0908	2.98622
443	15.9861	17.3368	3.2829
444	14.7314	22.8104	3.62533
445	15.4978	22.9478	3.28887
446	16.4453	13.2363	3.95931
447	24.3541	10.6403	3.54015
448	11.5039	18.3502	3.73383
449	16.2698	13.4387	3.08785
450	19.7622	17.6784	3.88412
451	17.722	13.5438	3.22356
452	9.23144	18.5212	3.0604
453	19.6851	19.104	3.47057
454	15.6833	16.9603	3.13103
455	7.4145	22.762	3.87953
456	17.0309	19.4687	3.78073
457	10.4888	23.2064	3.57681
458	23.2025	12.9869	3.3128
459	21.701	9.13951	3.79865
460	15.5965	21.4882	3.12233
461	17.5461	10.7613	3.7491
462	11.9336	19.4399	3.98246
463	14.9416	20.1455	3.18245
464	16.8228	11.354	3.3932
465	23.6539	13.6618	3.79057
466	24.1274	13.0805	3.28923
467	15.3289	22.6496	2.79429
468	15.1573	13.7814	3.54941
469	12.9236	10.5512	3.5272
470	9.74364	19.6504	3.07193
471	15.3186	9.84435	3.81556
472	9.97418	11.4181	3.22995
473	14.4783	24.978	3.02566
474	18.7529	13.8565	3.65275
475	11.8095	18.1448	3.31289
476	14.2321	21.3734	3.48733
477	11.8804	16.9312	3.72793
478	8.67942	17.2978	3.88237
479	11.0348	23.7247	3.9468
480	14.4591	13.5137	3.49585
481	26.0439	11.7084	3.35883
482	19.6937	12.0872	3.30743
483	22.5669	17.0462	3.14535
484	15.2134	9.13876	3.01749
485	14.0185	17.5075	3.6134
486	19.4187	18.0151	3.35487
487	10.8418	10.9818	3.72504
488	25.2821	15.834	3.34801
489	14.4164	11.7683	3.35823
490	15.1314	19.0963	3.22042
491	16.292	16.0069	3.75751
492	14.5832	13.5507	3.75666
493	13.9048	15.5025	3.88067
494	16.8345	9.57645	3.61851
495	9.00212	15.5501	3.92626
496	18.7309	17.9712	3.87665
497	11.9331	12.2534	3.37794
498	16.2193	15.4118	3.56366
499	17.6191	12.5177	3.86375
500	22.0007	17.1563	3.22332
501	12.1865	14.6551	3.92648
502	16.7444	14.3545	3.41372
503	11.8476	13.461	3.51216
504	25.4429	20.9754	3.89795
505	22.2736	22.5663	3.63335
506	9.72972	11.651	3.71589
507	20.1215	11.8089	3.8734
508	19.7328	19.3246	3.8893
509	16.2828	13.1845	2.88854
510	8.11722	13.9455	3.77453
511	19.5173	18.4906	3.76639
512	13.3215	17.0796	3.6269
513	10.0787	17.1042	3.70096
514	22.3391	20.9516	3.27357
515	20.1284	17.9964	3.36782
516	18.6999	9.49515	3.25735
517	21.0288	21.3173	3.60613
518	20.5909	22.6708	3.37218
519	16.0739	17.759	3.32121
520	21.6784	10.6375	2.90149
521	15.0188	14.3457	3.84639
522	20.3778	20.094	3.86622
523	14.254	11.479	3.5556
524	18.3148	6.11312	3.48314
525	18.3971	15.3931	3.18536
526	16.3871	11.0159	3.6193
527	15.8579	25.3376	3.17045
528	15.6199	16.4093	3.16382
529	13.4138	16.4361	3.46168
530	21.8705	11.6626	3.53192
531	15.5328	18.5549	3.67055
532	15.9745	18.9688	3.44303
533	18.4145	13.887	3.46079
534	17.711	16.9887	3.22641
535	11.9253	20.542	3.22545
536	19.739	15.9163	3.68382
537	11.5026	12.98	3.77136
538	12.2181	14.5158	3.49456
539	13.6308	16.7252	3.5345
540	10.973	18.5114	3.4489
541	15.6901	13.4428	3.45364
542	16.2691	17.2819	3.67901
543	15.4769	16.8156	4.20052
544	17.053	14.1276	2.92867
545	21.6987	9.86502	4.656
546	19.1715	13.9799	3.37078
547	17.5709	6.94781	3.39552
548	8.07552	17.9012	3.85986
549	12.8092	11.743	3.52194
550	17.0467	16.6755	3.39122
551	12.2522	13.5436	3.45737
552	18.6533	18.3226	3.15641
553	17.0975	16.2925	3.72489
554	20.626	19.8713	3.20907
555	20.0273	17.4046	3.39179
556	22.4045	19.3555	3.57235
557	14.5523	11.8724	3.74695
558	17.989	16.3023	3.29969
559	16.1135	18.248	3.74876
560	22.2051	13.5984	3.13257
561	18.6064	14.3673	2.4578
562	11.7036	8.34612	3.79667
563	20.2931	23.3369	4.03538
564	15.8868	12.1314	3.72116
565	10.5629	21.444	3.37715
566	12.4976	13.2155	3.65334
567	12.0492	22.676	3.94139
568	17.5316	14.8564	3.80997
569	16.1271	16.5218	3.44765
570	14.9314	12.5864	4.16103
571	15.8701	8.75385	3.0431
572	20.1597	20.4758	3.10974
573	14.2683	11.1095	3.22555
574	11.6395	13.6149	3.4177
575	20.5929	15.2961	3.9867
576	12.2985	14.68	3.43331
577	14.5243	13.1447	4.27515
578	12.0994	10.555	3.05231
579	11.498	11.8084	3.82637
580	22.4997	15.1106	2.92503
581	21.8019	20.1512	3.31318
582	10.5365	14.8969	3.70155
583	17.7225	17.1901	3.38102
584	15.2723	13.3109	3.49197
585	15.9949	14.6958	3.50766
586	15.3941	14.7516	3.55238
587	15.2288	10.9409	3.08733
588	21.6471	11.4421	3.50575
589	13.7945	12.1437	3.20182
590	18.3053	11.2662	3.39088
591	15.8682	8.7981	3.89955
592	10.939	12.7029	4.30442
593	14.8591	7.65526	3.2427
594	21.487	14.1406	2.76502
595	16.2119	19.2527	4.36178
596	16.8019	9.04747	3.84201
597	20.1735	16.3482	3.70517
598	12.284	13.7926	3.50565
599	18.0838	12.3891	3.4561
600	16.189	9.44177	2.67182
601	13.5373	22.7486	3.35624
602	18.2325	12.3913	3.2721
603	19.1643	16.1865	3.5439
604	21.4502	16.4927	3.19166
605	16.2663	16.3018	3.16231
606	20.3062	16.1112	3.84011
607	16.2125	23.2515	3.25391
608	19.215	18.4132	3.23988
609	17.7898	10.0076	3.35226
610	18.181	19.5019	3.44645
611	12.5089	24.1303	3.70434
612	18.0232	11.2434	3.24049
613	20.9214	11.3963	3.57384
614	17.5043	12.93	3.56437
615	20.2606	21.0805	3.55239
616	19.4266	14.3876	3.81784
617	13.423	17.3342	3.06245
618	20.6558	17.4299	3.9902
619	11.9088	17.5478	3.79713
620	11.0514	9.00258	3.51893
621	17.2461	21.07	3.34973
622	12.2743	16.3382	3.39704
623	20.2007	26.3928	3.45392
624	22.9027	19.6814	3.25856
625	13.3084	9.32461	2.95533
626	18.4559	15.6781	3.69283
627	13.6246	14.3661	3.94398
628	15.825	16.5681	3.82
629	19.6347	16.9027	3.6787
630	10.4624	15.9289	3.92947
631	18.7844	18.2385	3.4998
632	17.4499	21.2306	3.32506
633	18.2993	13.857	4.05161
634	18.0422	15.7788	3.46777
635	10.2222	9.89999	3.81071
636	10.0518	11.7434	3.00868
637	24.6413	13.5038	3.19892
638	29.5345	18.5597	3.84502
639	17.7587	12.2726	3.69417
640	13.8151	16.8104	3.5468
641	15.1915	16.0665	4.00127
642	17.2002	17.5331	3.77283
643	15.4624	19.2996	2.89861
644	20.2629	18.7054	3.4201
645	17.6115	10.2028	3.07074
646	20.3475	24.3957	3.42095
647	16.3174	12.0742	3.49945
648	10.7156	12.759	3.93054
649	17.7539	16.2397	3.33647
650	21.319	13.0867	3.72631
651	18.4885	14.4958	2.77912
652	21.5606	12.7494	3.64865
653	18.9886	18.0049	3.26984
654	18.4557	18.2915	3.58979
655	15.0149	13.1264	3.35702
656	19.028	9.53999	3.85071
657	6.99415	12.576	3.2487
658	17.0571	14.3185	3.47377
659	20.6798	13.0806	3.861
660	17.6045	12.0212	4.02118
661	10.2088	19.3796	3.21909
662	17.2806	12.2157	4.29899
663	22.1172	23.7077	4.17348
664	16.4798	14.1777	3.65771
665	22.5857	18.0698	3.74519
666	9.87514	15.9375	3.73024
667	16.6879	13.915	3.81339
668	18.9983	13.3917	3.77111
669	17.7111	13.6826	3.42973
670	8.95799	13.047	3.06607
671	10.3448	13.2209	2.727
672	17.5646	18.7084	4.36341
673	9.82013	14.9302	3.70549
674	11.9714	19.9146	3.65229
675	19.7711	23.1218	3.38995
676	15.2171	17.1569	3.46564
677	10.7074	20.0598	3.85615
678	17.5585	17.3313	3.24936
679	17.2713	16.4808	3.22368
680	15.4704	16.8511	3.10871
681	22.4744	13.5149	2.9039
682	17.1608	16.0652	4.20719
683	23.3229	17.0475	3.43399
684	16.9026	18.8621	3.74393
685	19.0305	20.8892	3.16248
686	17.5678	23.0004	4.08592
687	13.2332	14.7371	3.92576
688	17.4263	17.1823	3.4995
689	9.12664	12.2227	3.56767
690	17.0116	15.4818	3.00176
691	17.7343	17.4913	3.5304
692	14.2094	12.9891	2.86748
693	17.644	15.4134	3.53873
694	13.08	16.8601	3.27458
695	13.514	10.1779	4.30364
696	12.3778	17.8908	3.56586
697	17.4838	17.7262	3.24682
698	22.9687	16.7077	3.55201
699	15.6705	12.0843	3.43174
700	15.1129	12.4048	2.96233
701	14.4654	15.7278	3.55282
702	15.0632	26.5859	4.40675
703	22.8058	22.4574	3.38827
704	27.2009	18.527	3.37626
705	21.1514	14.0086	3.23172
706	14.7714	18.6687	3.45155
707	12.8063	10.1522	3.70485
708	11.8035	17.9982	2.91503
709	19.8757	13.1216	2.92646
710	19.1142	17.3821	3.21653
711	12.0351	10.734	3.72529
712	16.6692	21.6509	2.4388
713	7.40621	12.7273	2.99304
714	17.5352	26.2019	3.11567
715	13.8975	18.7344	3.65182
716	13.035	11.7702	3.91967
717	23.3708	17.1473	3.15634
718	16.5828	15.3693	3.78067
719	21.8683	11.1122	3.28592
720	16.4176	15.942	4.30583
721	8.22852	20.9218	3.85267
722	12.639	14.8754	3.84468
723	19.1142	14.7617	3.94188
724	13.9248	12.4229	3.50864
725	13.6199	16.6703	3.1761
726	14.1654	11.7001	4.24197
727	18.463	7.89272	3.39956
728	15.3766	17.2847	3.69985
729	13.3423	18.1757	3.41697
730	18.1675	19.2487	3.89871
731	21.1838	19.882	3.85475
732	16.5705	19.1007	3.61655
733	13.7619	9.90739	3.57006
734	20.6298	11.7689	4.13182
735	25.5141	23.6036	4.38146
736	16.1902	21.8655	3.8368
737	19.7841	12.5265	3.32571
738	20.0456	14.7943	3.64756
739	16.5748	12.5401	3.10595
740	18.5826	26.4477	3.07569
741	24.0704	10.6865	3.17187
742	14.3542	13.3991	3.56462
743	20.123	27.7145	3.78231
744	6.12777	13.4274	3.22612
745	12.4539	18.5204	3.49764
746	21.0951	27.3893	3.21707
747	16.2643	18.8688	3.88898
748	15.1585	8.69844	2.81648
749	14.6647	11.7894	4.05723
750	19.8705	11.7985	3.37455
751	16.5661	8.64027	3.53283
752	14.6596	23.8243	3.82567
753	15.3059	17.8758	3.22246
754	15.2302	18.7049	3.49397
755	17.306	12.8927	3.38039
756	11.753	14.5026	3.80792
757	13.6915	14.4942	4.13357
758	14.612	12.7452	3.65351
759	18.6617	19.6847	3.8457
760	14.7411	19.5631	3.16231
761	9.73346	21.1175	3.68476
762	15.1582	11.2599	3.53201
763	10.2649	16.1316	4.12308
764	18.5745	12.0714	3.263
765	17.5532	16.3545	3.31573
766	14.0084	22.1075	3.68078
767	11.9731	15.3032	3.46591
768	10.5095	11.5769	3.86098
769	13.1342	16.2557	3.66922
770	22.8657	15.5159	3.07921
771	10.1567	17.3639	3.91109
772	20.1215	20.5779	3.95926
773	17.0069	18.0843	3.43036
774	20.4136	9.86865	3.10383
775	13.1468	13.8414	2.75077
776	13.9651	13.7852	3.55114
777	5.89229	21.1662	3.07222
778	18.7237	12.0495	3.28973
779	11.3284	15.557	3.92811
780	17.8631	13.4814	3.19426
781	8.85123	16.1923	3.62511
782	16.3663	18.8664	3.7004
783	16.0811	13.5487	3.38215
784	22.3123	21.4635	4.15955
785	8.44473	15.8057	3.64054
786	15.9387	16.9824	3.68091
787	17.7065	13.4669	3.78873
788	14.1949	18.4306	3.31781
789	13.0639	6.84883	3.63887
790	17.7441	13.9484	3.45996
791	10.8042	14.0375	3.0323
792	18.0504	14.0533	2.76867
793	22.3519	7.45745	4.07576
794	16.2995	12.1792	3.21155
795	15.5925	11.53	3.94513
796	14.9797	20.6648	3.39391
797	10.057	18.9172	2.9464
798	21.6576	14.1401	3.47015
799	15.1043	9.84681	3.37606
800	17.9555	15.8679	3.90297
801	16.2203	14.2362	3.22472
802	14.6496	15.4808	3.21594
803	16.1771	15.6963	3.39749
804	17.7639	11.4492	3.83232
805	17.351	21.9065	3.83244
806	19.8832	12.3644	3.33318
807	21.0606	6.13059	3.59309
808	16.8948	16.3739	4.23034
809	21.1261	15.4723	3.62025
810	16.6908	13.3011	2.98391
811	15.7051	15.6545	3.32457
812	17.3537	16.2027	3.43617
813	9.99331	8.96329	3.16135
814	18.0446	12.6449	4.41665
815	12.1381	18.7717	3.06012
816	13.644	9.5919	4.21694
817	17.8566	14.4471	3.74183
818	11.7291	11.2799	2.58491
819	17.357	18.2807	3.01757
820	15.7647	21.5947	3.15265
821	21.6401	19.7737	3.67758
822	16.0137	14.8573	3.1182
823	11.7246	26.2157	3.43136
824	20.5163	14.1108	3.55182
825	12.8152	14.5153	3.20259
826	18.9358	19.3299	3.38601
827	14.5564	15.9216	3.07402
828	16.4947	18.4518	2.95395
829	16.8462	13.525	3.29111
830	19.4651	17.2566	3.67348
831	18.0051	17.5081	3.15275
832	19.4752	15.5543	4.01113
833	15.2337	14.8557	3.76436
834	18.5399	16.5201	3.44994
835	14.7868	13.3552	3.74617
836	13.9578	9.98324	3.4178
837	18.0525	10.9127	3.84168
838	17.7405	11.7908	2.97454
839	18.0253	15.3493	3.76981
840	15.4395	21.1803	3.30787
841	9.43604	16.2628	3.66202
842	18.102	10.8303	3.91571
843	12.724	24.5041	3.73784
844	20.9346	11.4739	3.22306
845	17.1855	18.7567	3.42546
846	11.4428	14.4119	2.83495
847	17.9005	14.5743	3.77089
848	16.449	19.4844	3.46
849	15.4347	15.4104	3.3062
850	7.63853	19.7325	3.17907
851	18.5831	14.826	3.89561
852	16.5299	17.7761	3.88689
853	20.9098	24.5656	2.88216
854	20.1501	23.529	3.89953
855	13.0021	11.7329	3.47205
856	18.5654	19.7117	3.08151
857	18.6912	8.63882	3.61084
858	15.4504	9.88653	3.37418
859	17.2398	10.2411	3.30877
860	11.9084	14.6068	3.36131
861	19.3204	16.1374	2.73023
862	14.6696	16.4121	4.19116
863	16.4789	20.2334	3.37009
864	8.34166	13.677	3.61541
865	17.574	19.303	3.62464
866	14.0283	12.3607	3.19109
867	20.6576	15.4453	3.22681
868	19.4579	18.8487	2.981
869	18.9963	16.6965	3.46527
870	19.9868	14.1014	3.4778
871	19.8546	10.157	3.63853
872	15.2286	9.7961	3.18315
873	19.0724	13.1558	4.08894
874	14.4736	17.2999	4.04673
875	14.6563	15.5394	3.2487
876	10.8667	11.532	3.12971
877	23.2994	10.5348	3.82944
878	14.7828	15.062	3.58374
879	21.5403	8.12881	3.70063
880	11.5956	17.6763	3.68306
881	12.4345	20.4156	3.2487
882	25.6784	15.0571	3.65079
883	13.3738	10.3439	4.0116
884	22.1672	18.4237	4.13633
885	19.3568	16.4122	3.368
886	17.6975	13.9566	3.14996
887	18.4193	14.9938	3.63894
888	15.4972	23.0225	3.97524
889	22.5131	20.8902	3.81527
890	26.001	27.8847	3.92294
891	16.7006	20.8326	3.24251
892	18.6639	15.7576	3.61975
893	13.5512	11.7571	3.71995
894	14.1712	16.6248	3.25089
895	18.2039	14.097	3.77092
896	21.0561	17.2433	3.16041
897	16.321	14.6556	4.04658
898	20.1649	13.3634	4.20838
899	17.0246	12.5341	3.18669
900	10.4005	12.2266	3.55956
901	18.2335	18.142	3.33573
902	16.8964	9.48888	3.46739
903	15.2272	17.4188	2.94626
904	23.8636	19.4701	3.95381
905	14.3213	17.6674	3.56018
906	13.3963	17.2471	3.75067
907	16.2052	13.0016	3.19216
908	13.5133	17.441	4.09383
909	7.68945	17.7314	4.11308
910	17.2413	18.9766	3.59244
911	26.3229	14.3755	3.78953
912	17.0729	13.2935	3.95345
913	13.7064	15.3733	3.67934
914	19.2762	22.1472	3.89594
915	19.6283	17.0271	3.62053
916	11.912	12.0536	3.46432
917	10.3176	11.4576	3.06043
918	25.0865	8.87356	3.67844
919	15.8273	19.2123	3.47293
920	14.8466	8.53654	3.18122
921	19.9819	20.5106	3.15533
922	14.23	13.9255	3.79533
923	5.8561	13.1016	3.19082
924	11.564	16.7059	3.9097
925	19.1702	23.2942	3.92485
926	9.02933	15.3208	3.23465
927	23.6102	12.0785	3.80531
928	29.8481	19.8358	3.40097
929	13.9645	18.7721	2.74088
930	17.8256	12.0475	3.02477
931	20.1882	25.7846	3.13409
932	17.4792	16.0806	3.33263
933	24.099	9.34119	3.71067
934	6.98962	16.0003	3.83858
935	21.5435	16.6517	3.58538
936	17.1866	9.70501	3.66454
937	17.3053	10.2837	4.275
938	19.4605	12.0969	3.5702
939	22.6981	13.2314	3.6913
940	14.0834	17.0234	3.9147
941	15.6238	7.38376	3.69722
942	8.61513	7.03587	3.13685
943	20.3231	13.4216	3.30443
944	13.8525	7.01616	3.3466
945	18.2614	8.52368	2.96724
946	13.6835	22.9944	3.34216
947	14.4942	16.4626	2.70585
948	14.8312	18.8118	4.14768
949	11.6559	15.5361	3.15448
950	16.5792	12.4192	4.08357
951	19.1802	13.071	3.65744
952	20.6328	20.0388	3.88213
953	21.598	17.7699	3.95962
954	14.1934	21.4566	3.74661
955	19.8528	16.303	3.36117
956	5.85592	14.6839	3.6836
957	14.5655	12.5538	3.27716
958	17.6508	12.8845	3.34679
959	17.2558	12.2031	2.61074
960	19.3903	16.9627	3.37855
961	12.9717	16.7564	2.96604
962	15.4308	7.30093	3.44025
963	23.017	25.8093	4.52417
964	19.3182	15.6442	3.88325
965	11.3602	16.9869	3.56114
966	11.1597	13.34	3.31411
967	23.9845	18.569	2.81088
968	16.4797	14.9027	3.22269
969	12.1325	17.8878	3.51451
970	16.3353	10.5487	3.55697
971	19.8941	12.0658	3.38402
972	22.7848	16.8484	3.11134
973	20.8173	21.95	3.56762
974	21.2122	9.87749	2.94549
975	18.7518	19.9421	3.22429
976	10.5517	19.6855	3.3919
977	14.7866	16.7781	3.75899
978	14.8266	13.337	3.28505
979	15.024	18.9247	3.45279
980	10.9083	15.9898	3.68804
981	19.6811	25.7937	3.27991
982	16.3387	15.5799	3.62034
983	15.1397	14.1991	3.42813
984	16.115	11.8738	4.0576
985	6.00958	12.3664	3.57613
986	12.4629	15.6088	3.29444
987	11.3141	19.0501	3.27508
988	16.9883	19.2637	3.45346
989	15.8521	17.7765	3.61998
990	18.0971	21.5823	3.1983
991	18.5929	17.68	3.26926
992	13.3659	16.0512	3.62253
993	15.0555	12.9515	3.46189
994	8.49334	24.4112	3.28449
995	15.4499	15.983	3.49224
996	22.8688	9.15819	3.81373
997	13.2557	14.1498	4.3345
998	18.5864	19.7524	3.89356
999	11.5245	21.1422	3.76231
1000	21.5915	17.761	3.34387
1001	14.5284	17.5743	2.92943
1002	15.1205	19.8254	3.47416
1003	11.937	24.3156	3.82374
1004	17.2922	19.765	2.27527
1005	20.1198	15.0408	3.7321
1006	11.0833	13.3377	3.87078
1007	13.9114	16.4905	3.70087
1008	16.4927	23.6368	3.58922
1009	19.7379	9.82964	3.80704
1010	17.4475	15.2767	2.97561
1011	11.1904	11.039	3.518
1012	11.9188	17.0087	3.73334
1013	19.2179	19.6494	3.62565
1014	24.1232	15.9634	3.20604
1015	16.6184	11.7176	3.24271
1016	12.3526	17.4197	2.87752
1017	13.8384	16.3258	3.20452
1018	15.7017	11.2945	3.92337
1019	17.0324	19.5627	4.27609
1020	26.1941	19.5146	3.51821
1021	21.7337	14.1438	3.44144
1022	16.9812	11.908	3.30593
1023	15.4788	16.6742	3.36531
1024	15.7419	15.5529	2.73703
1025	14.8408	19.183	3.61748
1026	16.607	15.6702	3.59192
1027	19.0259	18.9094	3.13441
1028	19.691	21.1805	3.30346
1029	23.0586	16.4498	3.3583
1030	19.5742	10.877	3.14709
1031	12.9636	15.5502	3.34337
1032	23.0869	11.2245	4.12637
1033	13.0899	18.9452	3.50158
1034	21.6086	20.9315	3.52767
1035	14.1525	15.9032	2.95607
1036	24.324	9.72649	3.98715
1037	21.7818	20.4706	3.52998
1038	18.1203	18.5326	3.16134
1039	14.7813	7.05898	3.31358
1040	19.8083	19.6706	4.04199
1041	10.774	13.007	2.83181
1042	16.0498	6.64422	4.14308
1043	20.8995	18.2994	3.3316
1044	13.1746	20.613	3.55662
1045	17.6265	11.5505	3.57558
1046	21.5521	14.8794	3.44859
1047	7.87881	11.9715	3.72843
1048	11.7632	15.8166	3.14027
1049	19.8036	14.0933	3.64587
1050	17.0216	15.7265	3.70787
1051	16.4286	17.0744	3.58703
1052	14.2633	13.875	3.28672
1053	16.8105	7.96172	3.30059
1054	13.9616	13.4752	3.57532
1055	15.7887	20.7535	3.61412
1056	20.2806	16.0227	3.25193
1057	20.1826	14.5442	3.39644
1058	13.2163	16.5582	3.27763
1059	17.9297	10.2671	2.81866
1060	19.4514	19.5916	3.91807
1061	15.6013	24.1083	3.31736
1062	15.2901	24.8817	2.95184
1063	8.84339	13.9808	3.9622
1064	13.4603	8.22967	4.00357
1065	18.6362	17.2312	3.51664
1066	21.5398	22.6801	3.62117
1067	20.6637	12.8776	3.82365
1068	14.0576	13.2837	3.71965
1069	14.7313	13.1893	3.55161
1070	16.1622	19.7453	3.81191
1071	18.0073	17.1615	3.12109
1072	18.68	13.9629	3.35231
1073	20.9049	13.6964	3.44399
1074	16.9786	10.3334	4.43006
1075	15.5201	23.5555	2.91129
1076	11.1134	17.0798	4.31503
1077	14.5268	15.1219	3.25862
1078	14.2429	18.0931	3.98186
1079	15.8197	16.7521	3.11175
1080	13.45	17.6534	3.39757
1081	18.6691	6.61481	3.04572
1082	6.70404	13.0021	3.19715
1083	12.2669	13.4814	3.12634
1084	15.7015	11.1268	3.43463
1085	20.0938	19.5728	3.22822
1086	28.3781	18.2068	3.42949
1087	23.1036	21.1459	3.10188
1088	11.5759	10.3168	3.68588
1089	9.71427	18.4352	3.49313
1090	14.5317	11.0821	3.47751
1091	15.0694	16.5619	3.84318
1092	16.9969	11.2333	3.20339
1093	13.3196	17.5859	2.44079
1094	16.7589	24.7241	3.45626
1095	22.4062	12.5977	3.6134
1096	16.1929	12.0667	3.36486
1097	18.2471	15.2578	4.09895
1098	15.628	22.0238	3.51982
1099	19.6295	12.4405	3.69907
1100	20.2907	10.9747	3.41536
1101	18.4771	17.2844	3.48635
1102	15.5285	22.3281	3.30085
1103	19.5811	20.6875	3.63166
1104	16.977	16.0559	4.09994
1105	18.2768	19.568	3.87431
1106	13.3015	15.9201	3.36994
1107	12.6675	14.7373	3.4447
1108	15.9765	17.1393	2.4633
1109	13.3898	17.5043	3.44533
1110	18.6422	7.06684	3.79621
1111	21.0656	12.7197	4.37017
1112	14.3169	12.8312	3.29196
1113	16.9095	12.2758	3.51242
1114	20.1725	17.5224	3.15846
1115	13.4258	11.1054	3.2088
1116	10.6422	9.48393	3.07847
1117	10.036	16.1919	3.91254
1118	17.1302	17.7877	2.63356
1119	19.6944	9.72219	3.41521
1120	13.7893	6.40871	3.61758
1121	16.3359	13.0223	3.27274
1122	13.9283	16.2989	3.13086
1123	19.4099	17.4087	2.55431
1124	15.2725	16.1579	2.85178
1125	23.3678	15.348	3.80895
1126	12.2881	13.1561	3.54957
1127	17.189	8.52877	2.62068
1128	15.9447	21.1073	3.18603
1129	19.0513	9.73381	3.70248
1130	20.9329	17.4958	3.82143
1131	16.5921	20.5017	3.49839
1132	12.3325	9.80524	3.32051
1133	20.9207	9.92044	3.32571
1134	20.7693	22.1436	2.88084
1135	15.378	8.30114	3.02507
1136	16.125	15.3685	4.23592
1137	13.1098	18.4532	3.07009
1138	11.3823	20.1737	4.17366
1139	15.4001	16.2739	3.83853
1140	15.6132	10.2125	3.34088
1141	10.9736	7.4847	3.09422
1142	9.39513	21.1874	2.90226
1143	12.6367	20.1731	3.96946
1144	12.1349	19.5156	3.46625
1145	22.2085	18.0134	3.50688
1146	17.934	18.6357	3.21803
1147	13.2058	20.6678	3.10228
1148	12.6985	9.90037	2.97186
1149	13.0912	8.94431	3.3627
1150	23.2953	7.12316	3.54908
1151	15.9844	12.6091	3.38751
1152	8.27711	18.6633	3.47557
1153	20.8498	15.2401	4.05273
1154	18.1148	13.0164	3.35262
1155	12.1163	18.2597	3.13338
1156	21.5318	11.933	3.61643
1157	16.9103	18.2243	4.08026
1158	11.537	11.8677	3.46158
1159	23.0584	18.2197	3.82301
1160	20.2657	16.6876	3.66556
1161	17.0316	23.3827	3.12185
1162	15.6869	10.5587	3.81695
1163	13.8606	14.2758	3.57204
1164	23.0747	18.3063	3.57475
1165	18.6302	17.725	3.2848
1166	22.6914	19.2199	3.14031
1167	23.6447	18.1985	3.17668
1168	6.64889	15.736	2.81399
1169	17.1787	7.28441	2.89922
1170	20.1353	12.2924	3.27301
1171	9.84768	23.6563	3.5829
1172	12.9174	16.4117	3.66314
1173	9.27929	14.0858	3.63158
1174	10.9221	10.9258	2.76338
1175	25.3101	13.5074	3.85845
1176	13.0073	8.64436	3.40522
1177	23.7131	7.07325	3.12635
1178	19.0233	13.0882	3.08478
1179	20.8227	20.6951	3.43593
1180	16.1124	19.8488	3.1553
1181	12.5964	14.5109	3.6552
1182	11.7368	11.9483	3.86261
1183	11.7384	17.8983	3.7725
1184	19.6307	18.0448	3.94629
1185	19.5478	12.1334	3.0661
1186	18.6641	12.8975	4.2215
1187	15.6056	13.9224	3.89105
1188	8.74775	11.631	3.48934
1189	16.5904	9.83005	3.97237
1190	21.957	20.9716	3.33393
1191	18.1341	16.165	3.32006
1192	13.9843	12.8409	3.47713
1193	17.6983	13.7853	3.25852
1194	14.4051	22.356	2.97904
1195	15.3973	16.8636	2.98988
1196	16.6136	15.8644	3.73901
1197	25.2383	13.0109	3.06928
1198	17.2461	18.0322	3.49734
1199	18.4891	16.1723	4.1976
1200	16.3832	15.0309	3.05737
1201	10.5006	28.1199	3.74443
1202	13.5561	22.7131	3.87287
1203	13.2666	26.1407	3.30901
1204	14.4203	13.6139	3.21763
1205	13.7941	17.508	3.79026
1206	19.6432	10.4464	3.62839
1207	16.6209	20.0706	3.29568
1208	16.6183	23.6288	3.36658
1209	17.015	14.9177	3.18249
1210	7.43585	18.6694	3.61993
1211	19.2477	12.9263	3.30962
1212	12.9763	15.6927	3.68893
1213	15.1995	12.3343	3.72445
1214	15.7229	11.8855	3.77625
1215	16.3144	12.8954	3.41574
1216	14.7783	15.0183	3.49054
1217	21.5603	19.5937	3.52542
1218	13.5518	21.4876	2.95843
1219	12.1745	13.0284	3.13726
1220	15.9092	18.4345	3.58816
1221	16.1188	10.2765	3.07761
1222	16.6564	15.5762	3.72647
1223	17.9367	12.5464	3.68771
1224	15.1732	11.7536	3.12179
1225	17.514	24.0483	3.61422
1226	19.3013	15.5475	3.41709
1227	14.3783	20.0702	4.02573
1228	16.2047	12.7127	3.64193
1229	20.9271	19.7018	4.62248
1230	16.8651	23.3664	3.03915
1231	21.7481	11.6854	4.07513
1232	20.1662	7.09532	3.21552
1233	22.2779	23.0555	3.62078
1234	20.3429	11.7998	4.18749
1235	13.7072	7.82494	3.36566
1236	15.688	13.6639	3.59281
1237	18.5622	17.5872	2.69438
1238	18.6838	8.97127	3.56063
1239	17.855	11.9626	3.67407
1240	19.2229	13.2802	3.65835
1241	14.4628	9.45431	3.64415
1242	22.2368	23.46	3.10357
1243	22.4451	25.2387	3.24172
1244	12.4685	14.8114	3.95511
1245	17.113	13.0792	4.10915
1246	8.55995	13.396	3.79274
1247	17.8875	18.1032	3.15926
1248	19.4083	11.2824	3.86917
1249	23.8956	11.1804	4.0701
1250	24.1636	16.0484	3.72985
1251	18.5057	16.965	4.33821
1252	15.9791	14.9454	3.70118
1253	10.935	13.869	3.40142
1254	14.4628	8.54687	3.06989
1255	14.7625	20.4868	3.43372
1256	15.8927	13.7829	3.03872
1257	13.745	14.3598	3.37241
1258	21.3619	18.1828	4.02453
1259	15.9493	19.2958	3.57986
1260	21.2902	10.9633	3.15362
1261	14.4967	11.1873	3.98283
1262	15.6163	13.6675	2.75445
1263	24.1976	16.081	3.27081
1264	19.0418	16.2321	3.80514
1265	19.8637	16.2743	2.8603
1266	19.6647	17.2071	3.76698
1267	17.6149	19.3898	3.62097
1268	10.4046	10.1934	3.13657
1269	13.2398	14.1692	2.89101
1270	11.5609	13.2396	3.49958
1271	24.1382	20.2438	4.13227
1272	15.0246	7.9098	3.63838
1273	19.573	15.9673	3.95184
1274	16.2636	13.9101	3.60238
1275	17.2888	21.0311	3.93438
1276	13.8111	10.8346	3.72111
1277	11.766	15.0529	4.07684
1278	17.7744	18.9115	3.61331
1279	17.2496	16.214	3.63307
1280	15.6861	9.20281	3.38504
1281	16.9313	18.8323	2.82409
1282	8.11928	13.2866	3.64001
1283	14.2279	18.6788	3.74679
1284	19.5089	19.9161	3.59257
1285	13.9668	11.6054	3.66174
1286	12.0736	17.5976	2.87945
1287	14.5105	17.4459	3.85894
1288	20.4053	14.859	3.13766
1289	11.4723	18.9472	3.44004
1290	11.0077	19.7316	3.40074
1291	18.6829	8.14019	3.76287
1292	16.1	18.5393	3.31592
1293	13.108	20.0988	3.32589
1294	17.3452	16.1284	3.47952
1295	20.5745	23.5481	3.83628
1296	21.6979	10.4311	3.60846
1297	18.0019	12.4936	3.65674
1298	17.4164	11.6166	3.29429
1299	21.5127	9.51767	3.35186
1300	13.9426	20.0148	3.70729
1301	16.246	10.0285	3.7103
1302	13.897	14.7847	3.53842
1303	8.02625	20.2511	3.42797
1304	19.6687	20.3731	3.79644
1305	17.4954	15.1147	3.32316
1306	13.8945	18.3817	3.49761
1307	14.6022	9.2185	3.97098
1308	16.8698	18.4158	3.40186
1309	19.7281	17.1382	3.38859
1310	10.52	9.63411	3.85375
1311	19.528	11.5197	2.88157
1312	15.5057	20.4704	3.56408
1313	15.1473	12.8782	4.00153
1314	20.4674	15.5605	3.33947
1315	21.6433	17.7321	3.77506
1316	15.8303	10.987	3.23817
1317	16.9905	13.4395	3.51832
1318	16.564	21.5662	4.0476
1319	10.3193	22.2983	3.64367
1320	11.5514	15.5679	3.86399
1321	18.3764	24.6797	3.16645
1322	14.4356	19.5691	2.86268
1323	25.5229	10.7066	3.97983
1324	15.4426	11.7142	3.76392
1325	17.308	26.2193	3.71809
1326	19.3823	10.0526	4.15771
1327	16.2485	16.8361	3.30692
1328	17.3015	13.0948	3.3565
1329	23.3758	12.7015	3.581
1330	21.0596	15.158	3.68999
1331	19.0467	13.3572	3.55863
1332	15.7936	16.6141	3.61642
1333	15.4732	19.3123	4.2455
1334	15.9818	7.76727	3.59609
1335	20.1031	15.1118	3.77273
1336	17.9165	12.8934	3.43863
1337	10.7403	11.8796	3.19308
1338	11.5658	19.9621	3.70647
1339	20.386	10.2713	3.38064
1340	19.5022	19.3639	4.01772
1341	13.5721	16.5251	3.23505
1342	14.4946	8.45748	3.23827
1343	14.3252	11.5167	3.43233
1344	17.7513	22.2978	3.1203
1345	15.0173	15.106	3.61829
1346	21.577	24.2361	3.42874
1347	19.587	15.642	2.86133
1348	19.5635	11.372	2.97123
1349	14.4711	11.1604	3.55737
1350	17.8891	19.2626	3.51314
1351	17.7934	13.521	3.1597
1352	14.6471	13.9973	3.67034
1353	20.9798	13.9516	3.28193
1354	14.4827	23.4563	3.0427
1355	13.5522	23.9607	3.56098
1356	9.36291	15.4393	3.36855
1357	15.1302	19.6462	3.64558
1358	19.6437	17.0573	3.72374
1359	14.555	18.4656	4.1168
1360	16.5569	20.1107	3.70778
1361	21.2246	15.2221	2.70585
1362	15.1815	14.1904	3.51767
1363	16.7826	9.66129	3.64398
1364	20.7288	13.9592	3.33937
1365	12.723	18.4635	3.37104
1366	18.4902	12.2013	3.40747
1367	14.6317	9.85023	3.14811
1368	14.9845	12.5342	2.93343
1369	16.2632	7.35765	3.58659
1370	15.0977	20.1703	3.31839
1371	11.1402	8.5546	3.31521
1372	18.5049	19.9664	3.41278
1373	7.99202	16.7931	3.17373
1374	15.3314	6.62289	3.77164
1375	16.1805	15.0405	3.29597
1376	9.52748	17.2593	3.09273
1377	9.78358	15.8735	3.00905
1378	15.6107	15.1897	3.63855
1379	7.94454	9.83778	3.32364
1380	19.4459	19.7533	3.32233
1381	12.3011	7.59247	3.77708
1382	16.43	18.0549	3.24277
1383	25.7104	17.0047	3.27107
1384	12.1796	17.8427	3.39144
1385	18.2724	9.5494	3.56735
1386	26.2005	14.2566	3.5932
1387	16.4958	7.85721	3.70437
1388	16.0294	17.1878	3.62502
1389	15.6342	10.2562	3.37472
1390	18.435	18.3145	4.18857
1391	23.2992	19.2191	2.98565
1392	13.6516	11.9188	3.87033
1393	19.0538	9.93575	3.4117
1394	14.6299	12.5682	3.71764
1395	15.9032	19.2216	3.27659
1396	21.5036	15.4372	3.2281
1397	17.9219	20.8773	3.40567
1398	13.085	19.53	3.28148
1399	21.2721	23.0248	3.24115
1400	14.906	17.6028	3.62339
1401	15.1902	17.1937	3.97947
1402	10.9451	18.534	3.50873
1403	20.7661	19.5063	2.98903
1404	14.6211	23.6866	3.89146
1405	12.0767	19.2108	4.01249
1406	15.4457	14.8636	3.18576
1407	12.3319	14.8702	3.24551
1408	15.7476	17.5563	3.44777
1409	8.80184	23.0941	3.75362
1410	18.4405	6.60917	3.99943
1411	14.8063	17.418	4.25195
1412	20.1186	16.1361	3.53535
1413	14.1148	12.995	3.05466
1414	12.9359	14.0874	4.2267
1415	17.2445	14.5585	3.06691
1416	22.0303	14.922	2.90186
1417	20.536	6.31531	3.52531
1418	21.7295	13.3092	3.86813
1419	19.1035	15.2917	2.87447
1420	16.7156	10.1301	3.11642
1421	23.3654	12.6874	3.87263
1422	17.1901	10.3848	3.55635
1423	20.0466	13.8814	4.02293
1424	12.0031	14.1798	3.86317
1425	13.7182	6.92982	3.17477
1426	14.3389	13.2601	3.63842
1427	15.9015	15.2761	3.12479
1428	15.3503	14.8425	4.01308
1429	6.82957	16.2823	2.88823
1430	11.3689	15.4934	2.95975
1431	21.9205	16.54	3.17424
1432	24.3037	15.595	3.17871
1433	16.3409	20.4034	3.61388
1434	20.7767	18.5899	3.62995
1435	9.92832	14.9206	3.43982
1436	16.7713	17.4555	3.8973
1437	20.9349	15.2607	3.3908
1438	15.8597	14.2866	3.86631
1439	18.9242	15.6616	3.1441
1440	24.0594	10.7936	2.79561
1441	17.1185	7.37747	3.29228
1442	20.9938	16.3814	3.77946
1443	13.502	18.8298	3.77957
1444	20.3046	13.5229	4.09867
1445	13.4201	16.4124	3.8703
1446	16.368	16.1632	4.01476
1447	13.9698	23.822	4.15194
1448	17.2631	19.2683	2.98357
1449	25.6445	16.8393	3.66669
1450	23.0211	11.3674	4.02963
1451	14.6396	13.3885	3.00361
1452	15.2052	15.9011	3.14805
1453	17.1264	7.13949	3.55494
1454	16.8765	13.3646	3.40652
1455	8.62816	17.5594	3.54184
1456	14.2479	19.1357	3.13982
1457	10.3211	20.3785	4.01378
1458	19.1093	17.0398	3.52281
1459	13.4958	12.4	3.67903
1460	24.1383	15.5145	3.08559
1461	14.1209	15.4754	2.54086
1462	17.7538	21.3292	3.60415
1463	13.2682	15.9978	3.71856
1464	20.8851	16.0851	3.53854
1465	12.7111	12.6857	2.96145
1466	8.43661	17.8128	2.95077
1467	9.51054	10.8986	3.40233
1468	15.065	16.1741	3.62297
1469	15.999	11.4343	4.08252
1470	22.8372	13.1754	3.55744
1471	16.5271	14.0135	3.77028
1472	13.5274	14.9297	3.80039
1473	13.1114	24.144	3.20286
1474	25.0201	14.2031	3.46155
1475	11.886	13.1471	3.33023
1476	13.6346	9.86804	3.48742
1477	20.2446	19.6618	3.43652
1478	20.5021	17.0609	3.04207
1479	18.2348	9.83982	3.87742
1480	14.1464	20.5092	3.52857
1481	24.3076	26.0962	3.76358
1482	13.1685	23.9088	4.09951
1483	14.7339	13.0609	3.4272
1484	22.2758	17.7468	3.73295
1485	10.957	10.8288	3.42945
1486	16.8765	18.7877	4.23772
1487	19.5945	10.8875	3.00257
1488	20.8713	18.2064	3.83794
1489	7.99246	16.6193	3.20855
1490	17.0629	12.3536	3.67871
1491	14.2991	22.2883	3.05003
1492	15.5673	8.71681	3.83864
1493	14.1568	16.6951	3.60009
1494	15.2199	12.8275	3.75319
1495	13.2461	15.7311	3.05957
1496	21.6402	22.8442	2.90277
1497	18.4665	19.1038	3.681
1498	6.49489	16.9815	3.9889
1499	22.0447	18.3431	3.41749
1500	27.3339	15.9501	3.43429
1501	23.597	17.3602	3.87833
1502	23.0202	13.0648	3.16804
1503	22.6715	19.7035	3.44167
1504	19.6503	13.1128	3.4645
1505	17.9662	22.9736	3.56189
1506	18.7105	23.0656	2.82432
1507	17.7906	17.7091	3.69044
1508	13.3093	8.40496	3.61184
1509	17.2783	17.6858	3.50516
1510	13.716	23.3787	3.84728
1511	17.7506	14.5697	2.9505
1512	10.6784	12.4429	3.56747
1513	22.5763	19.25	3.50466
1514	7.12233	12.154	3.21808
1515	16.7343	9.98568	3.49083
1516	10.3782	13.8959	3.76415
1517	16.8967	9.63097	3.82357
1518	12.2373	13.7069	4.08323
1519	23.2942	21.826	3.69705
1520	14.4465	18.0039	3.15905
1521	17.9451	15.039	3.55143
1522	13.4167	21.5155	3.59971
1523	18.4184	13.2142	3.46344
1524	8.51804	14.3621	3.44913
1525	17.3814	11.0822	3.50386
1526	21.6748	10.8996	4.01901
1527	13.9592	17.2424	3.88861
1528	14.9145	16.488	2.85609
1529	10.1422	17.5545	2.73931
1530	23.5298	19.8099	3.09306
1531	18.361	25.3011	3.99474
1532	18.292	21.7731	4.11657
1533	14.9253	15.0542	3.35642
1534	18.4685	12.4326	3.69605
1535	14.0211	10.0566	3.47492
1536	21.6584	13.3035	3.37494
1537	10.4406	12.3168	2.50589
1538	15.4444	18.2292	3.09147
1539	11.6571	20.169	3.28971
1540	12.8453	21.8027	3.79398
1541	21.386	14.1579	3.62271
1542	13.1378	9.93962	3.30688
1543	15.1981	16.232	3.39139
1544	22.853	13.7336	3.29672
1545	18.7517	16.1571	3.88676
1546	10.3757	18.1912	3.72665
1547	11.8257	17.5569	3.86632
1548	12.2754	10.0797	2.99147
1549	18.1214	16.9627	3.02059
1550	14.9906	13.5561	3.29994
1551	15.1949	19.4721	3.35271
1552	17.8285	14.7204	3.68273
1553	9.99228	17.3505	3.02425
1554	20.2374	13.7874	3.90217
1555	17.265	13.0621	3.40191
1556	18.5475	13.9312	3.27261
1557	21.4882	10.7837	3.41017
1558	14.3604	15.2741	3.44109
1559	19.2478	20.3036	3.2679
1560	12.6862	13.6681	3.78129
1561	20.1632	19.4789	3.89204
1562	15.9315	13.1739	4.03597
1563	11.4044	19.0485	3.34677
1564	17.4294	17.1415	4.10566
1565	8.44171	10.8291	3.36901
1566	25.3909	15.9994	4.35305
1567	7.36788	18.1243	3.49374
1568	8.83339	14.9766	4.11105
1569	15.7342	14.3101	4.03141
1570	12.5896	9.56895	3.90644
1571	16.0078	10.0167	3.14033
1572	19.5487	16.0463	3.6098
1573	20.4045	15.9684	3.20379
1574	10.9571	10.0468	3.70015
1575	7.57934	6.88099	3.49907
1576	14.3694	10.3828	4.35351
1577	28.2265	20.9162	3.45926
1578	14.2029	15.2195	3.46427
1579	8.62164	20.8592	2.80674
1580	12.7974	18.3638	3.23168
1581	21.6054	8.076	2.89819
1582	21.02	14.1323	3.66871
1583	14.6165	20.438	3.05695
1584	17.6839	10.7159	3.61074
1585	17.8749	22.0339	3.89637
1586	5.97653	10.7001	3.60057
1587	17.2737	18.2693	3.43388
1588	19.1771	14.2661	3.78924
1589	13.0974	18.5787	3.52149
1590	14.9721	18.2111	3.60206
1591	12.3016	12.985	3.77143
1592	14.6651	18.5449	3.52238
1593	7.2418	25.832	3.86173
1594	16.0609	18.2094	3.3785
1595	16.4138	12.3894	3.21673
1596	18.7014	10.214	3.64505
1597	17.2107	11.0772	3.40385
1598	13.9381	16.2328	3.83647
1599	8.88362	19.871	3.7345
1600	12.3095	16.7247	3.48837
1601	7.69341	19.2236	3.50458
1602	19.5015	14.233	3.09775
1603	14.9598	16.8828	3.75147
1604	19.2063	17.6627	3.46954
1605	12.7687	17.3465	3.47898
1606	22.338	15.494	4.00495
1607	16.5581	15.7773	3.70422
1608	17.544	17.3488	3.62647
1609	12.5621	27.5939	3.26538
1610	20.0178	19.5472	3.79848
1611	12.8432	13.7723	3.38639
1612	20.8865	20.3958	4.02755
1613	14.5113	11.7882	3.439
1614	18.4532	18.6481	4.07171
1615	16.8901	16.6133	3.48994
1616	19.5348	10.5193	3.74505
1617	17.8808	17.9483	3.3912
1618	14.107	13.6779	3.75088
1619	12.1407	15.2004	3.5534
1620	13.2356	16.629	3.72731
1621	15.1586	10.411	3.88875
1622	14.7152	16.2781	3.6911
1623	13.3389	12.1675	2.67415
1624	14.4461	16.2185	3.83202
1625	22.8479	19.3719	3.63134
1626	15.2501	24.0635	3.54987
1627	12.2688	17.9455	3.59871
1628	14.9093	19.988	3.52767
1629	21.8845	13.3443	3.57681
1630	20.5199	16.1721	3.81314
1631	12.6472	8.85308	3.9619
1632	27.4033	11.4019	3.53374
1633	16.2003	15.9286	3.8298
1634	13.3934	19.9718	3.30264
1635	15.4224	23.8452	3.23466
1636	17.6384	7.80203	3.43708
1637	10.2042	18.1666	3.21862
1638	20.4734	12.2967	3.19825
1639	9.3579	18.1282	3.85865
1640	11.2624	16.1132	3.8151
1641	11.0055	23.6264	3.21087
1642	15.2488	17.9689	3.14356
1643	20.8838	21.4753	2.95279
1644	18.2023	18.0956	3.50181
1645	12.6843	20.8387	3.6706
1646	12.921	15.8365	3.71222
1647	23.7518	11.585	3.18507
1648	10.2962	23.1251	3.20019
1649	16.0859	15.3992	3.16507
1650	15.2801	15.4099	4.04698
1651	18.9247	13.6909	3.03946
1652	7.79167	19.7285	3.24164
1653	13.2777	14.6009	3.56314
1654	16.3881	11.796	3.42289
1655	11.1295	15.6956	3.51126
1656	20.7825	23.6821	3.57076
1657	18.6838	13.4	3.54899
1658	13.2681	18.5658	3.42136
1659	7.38372	19.6815	3.23282
1660	16.1844	14.2417	3.08169
1661	14.0821	15.9229	3.82556
1662	16.4604	15.2395	3.25812
1663	12.1374	10.1199	3.98294
1664	16.5743	21.7395	3.39291
1665	19.7747	10.9606	3.85826
1666	12.3048	6.83991	4.15976
1667	10.1037	18.3313	3.74795
1668	22.5603	9.15676	3.07395
1669	16.2337	8.91479	3.70882
1670	15.2119	15.6051	3.84815
1671	15.42	17.5716	3.71298
1672	15.1919	13.8634	3.02569
1673	22.5649	14.3326	3.57163
1674	10.8874	12.9483	3.58836
1675	16.7429	18.843	3.76707
1676	6.85355	24.0692	3.60027
1677	12.1855	13.3725	3.75991
1678	15.8122	12.5441	3.31065
1679	13.6947	18.5678	3.05633
1680	19.4425	21.4598	3.95433
1681	19.8219	17.1733	3.82357
1682	13.3559	11.2975	3.95505
1683	21.63	13.8499	3.67854
1684	11.39	12.3194	3.47398
1685	13.2455	7.07004	4.55247
1686	22.403	19.9752	3.48465
1687	12.6849	7.48021	3.68722
1688	17.7503	19.531	3.10687
1689	19.631	13.4292	2.56565
1690	9.45832	19.1428	3.45236
1691	17.3086	17.6337	4.45208
1692	19.924	18.1379	4.0053
1693	19.7306	10.586	3.79987
1694	19.5534	11.0769	3.31826
1695	18.7962	20.3156	3.51808
1696	21.1313	14.6021	3.8457
1697	19.3662	20.7513	3.37731
1698	15.7078	18.2729	3.77913
1699	18.3579	17.8145	3.56888
1700	19.382	13.474	2.98929
1701	19.0548	13.8404	3.45457
1702	15.1829	8.11827	4.24594
1703	12.752	15.5126	4.02471
1704	11.9324	17.301	3.52003
1705	6.78072	17.443	4.20686
1706	13.1511	8.99703	3.05305
1707	22.0364	17.8912	4.31004
1708	18.3678	15.7489	3.12861
1709	10.6345	11.0903	2.65236
1710	12.3059	19.074	3.12808
1711	10.8326	27.0289	3.34131
1712	18.0796	13.5465	3.25268
1713	23.6557	19.9811	3.92293
1714	19.4662	11.5772	4.09745
1715	15.2658	19.7168	3.39361
1716	18.5461	14.1043	3.38219
1717	17.1887	18.9026	3.42579
1718	20.465	17.1145	3.47646
1719	9.53182	23.3995	3.44728
1720	20.8424	17.7012	3.92673
1721	17.2122	18.3942	3.57088
1722	12.4911	14.6153	3.13361
1723	16.4449	21.0282	4.00527
1724	11.5083	16.0642	3.28567
1725	16.8803	23.2805	4.27944
1726	15.467	25.1149	3.35724
1727	9.85806	17.9084	3.93007
1728	19.8746	16.122	3.92199
1729	18.7825	14.2344	3.63212
1730	15.476	21.3692	3.59843
1731	10.0431	10.8213	3.88226
1732	17.7432	16.4751	4.16233
1733	17.6929	20.1597	3.48574
1734	24.0742	18.454	3.39447
1735	16.9923	19.9134	2.71318
1736	12.9575	12.9849	3.30381
1737	7.46671	12.9993	2.9947
1738	9.8049	15.0735	2.49515
1739	10.6004	20.2	2.36669
1740	21.9656	23.1674	3.70915
1741	14.0704	17.5601	2.87327
1742	17.5615	11.8091	3.21638
1743	19.9407	13.5063	3.35898
1744	13.9097	14.5744	3.39426
1745	20.4909	7.42709	3.63683
1746	16.3391	13.9491	2.97111
1747	6.44418	10.8494	3.3575
1748	17.4357	12.0981	3.35146
1749	16.859	21.8228	3.75114
1750	18.7542	19.8934	2.89366
1751	18.5725	22.5496	3.00436
1752	19.822	9.34666	3.12718
1753	17.6164	20.9932	2.87681
1754	22.3904	16.5844	3.40203
1755	17.4199	12.7561	3.78253
1756	16.3493	15.8638	4.15783
1757	17.4986	15.1059	3.44967
1758	12.019	15.4766	3.72235
1759	13.5496	11.458	3.18798
1760	15.6874	19.3372	3.66291
1761	18.8571	11.7294	3.68276
1762	19.4686	13.3299	4.00304
1763	15.9957	21.7254	3.63508
1764	8.70121	8.73075	3.44414
1765	15.1145	8.58191	3.3532
1766	19.6608	7.28035	3.17477
1767	7.63851	20.3192	3.83783
1768	13.6495	20.2839	3.46358
1769	25.8343	23.5581	3.26149
1770	15.401	15.4997	3.53369
1771	19.917	12.445	3.78152
1772	17.8328	21.0119	4.37064
1773	21.2992	15.349	2.86638
1774	19.1899	9.19441	3.65768
1775	16.154	19.1187	3.21409
1776	21.3998	9.86135	3.16505
1777	16.1946	21.4524	3.87066
1778	24.7614	14.3565	3.53164
1779	12.9087	14.1192	4.01413
1780	11.4638	11.8487	3.2428
1781	24.2452	12.0295	3.34124
1782	21.6725	10.9897	3.4008
1783	21.7923	11.0128	3.65097
1784	15.1717	18.1283	3.53946
1785	15.5677	16.6013	3.7617
1786	19.7141	18.6943	3.55039
1787	14.8977	18.4119	3.85287
1788	23.0649	16.3277	3.12839
1789	19.2358	18.6142	3.57928
1790	12.3873	19.6453	3.53011
1791	18.4352	18.0085	3.81119
1792	12.0316	14.0909	3.23496
1793	19.4962	17.8109	3.51779
1794	20.5671	9.61659	3.50297
1795	10.0666	15.4552	3.49555
1796	17.8903	20.937	3.47456
1797	17.101	16.4984	3.74275
1798	13.1224	16.5748	4.11016
1799	18.4747	14.0347	3.27702
1800	19.7218	18.1066	4.03195
1801	11.503	22.7158	3.39442
1802	20.3133	20.3109	3.61256
1803	10.9191	18.916	2.84282
1804	14.425	13.7444	3.00506
1805	11.7946	8.53189	3.27863
1806	12.1074	17.409	3.62399
1807	16.6173	19.7096	3.6012
1808	13.8438	13.9407	3.16922
1809	12.6534	17.6377	3.98143
1810	17.8573	19.8205	4.1364
1811	19.337	10.6905	3.25897
1812	12.1642	21.791	3.66977
1813	9.73652	20.7132	3.66606
1814	8.81778	13.7103	2.99411
1815	10.0455	21.8435	3.68688
1816	15.0314	15.2926	2.94876
1817	14.6286	12.9506	3.37422
1818	21.2874	18.2436	4.03451
1819	15.2632	10.73	2.85443
1820	21.8688	19.6037	2.76533
1821	14.4847	15.6064	4.00459
1822	14.9779	16.7914	4.16213
1823	23.188	12.2053	3.33424
1824	13.0185	12.0701	3.57813
1825	10.7799	18.6231	3.34902
1826	14.7468	17.1305	3.73685
1827	20.3733	18.7361	4.15639
1828	15.4179	6.38786	3.70814
1829	20.5884	19.253	2.69605
1830	17.7722	16.1042	3.45319
1831	10.9019	15.9652	3.70422
1832	18.7248	12.9647	3.1164
1833	17.1803	10.2626	3.12588
1834	16.8937	16.1039	4.05235
1835	22.4201	21.6422	3.70519
1836	10.74	19.5077	3.45174
1837	21.4763	14.2932	3.52313
1838	19.0538	21.5898	3.82799
1839	12.4448	13.1557	3.97674
1840	12.2433	13.9397	3.18852
1841	11.1394	7.76122	3.42732
1842	12.8392	19.9882	3.97232
1843	9.52055	26.4827	3.60379
1844	15.5574	11.2899	3.68232
1845	17.748	13.012	4.11211
1846	17.0502	16.3825	3.98627
1847	11.6532	11.7563	3.39029
1848	17.8057	17.5195	3.58102
1849	17.2604	12.1155	3.4878
1850	18.5039	18.8096	3.34263
1851	17.2183	13.8198	3.09461
1852	16.3256	14.6184	2.93855
1853	17.7648	13.1532	3.38423
1854	15.6676	8.33487	3.66418
1855	18.113	17.0411	3.5108
1856	17.0897	14.7379	3.0194
1857	11.1169	23.1918	4.22768
1858	18.1433	25.1281	3.78481
1859	15.6678	19.0228	3.43533
1860	15.8937	16.5226	4.1179
1861	14.7177	16.3066	3.9088
1862	17.6618	7.18716	3.60085
1863	19.2326	10.8584	2.74823
1864	13.0545	14.343	2.73738
1865	14.8372	16.7268	3.30701
1866	15.5455	7.89915	2.96611
1867	16.5604	18.2299	2.81386
1868	25.1699	20.9854	3.62405
1869	9.52895	28.6487	3.93294
1870	19.8418	13.1214	3.1094
1871	10.0536	16.4729	3.11473
1872	14.4074	16.3403	3.20688
1873	11.1565	9.78962	3.50176
1874	21.3957	22.4387	3.28737
1875	13.7185	22.0492	2.75911
1876	18.5778	10.183	3.16325
1877	9.9901	14.4235	3.90093
1878	19.9535	22.0182	3.85537
1879	20.8134	11.6738	3.78813
1880	16.2773	14.4252	3.10731
1881	16.3725	19.8032	3.00192
1882	14.599	13.9915	3.11183
1883	18.3632	8.84377	3.84912
1884	10.971	10.2008	3.12031
1885	18.805	11.3928	3.71661
1886	11.8366	18.2217	3.57109
1887	18.8348	19.4731	3.86342
1888	12.8884	10.7666	3.81194
1889	15.225	10.6996	3.64809
1890	17.5252	11.8895	3.01138
1891	21.3812	20.2201	3.94597
1892	13.7784	7.81863	3.55713
1893	16.2318	15.3136	3.54285
1894	7.80939	15.6775	3.42185
1895	10.0004	18.0783	3.94759
1896	13.5804	20.9733	3.44098
1897	15.9028	15.8482	3.30179
1898	20.1726	17.2897	3.02791
1899	15.5231	8.58235	3.2504
1900	17.3767	12.6502	3.80627
1901	17.8601	22.6722	3.93784
1902	14.3214	11.5791	3.11953
1903	23.9519	10.0325	3.84902
1904	16.0201	17.135	3.47899
1905	23.4539	17.7656	3.37396
1906	15.9568	17.6183	3.66694
1907	14.2498	11.5225	2.83718
1908	13.3074	19.9985	3.12375
1909	19.7494	12.3422	3.22188
1910	8.77838	12.4208	3.90849
1911	18.9775	16.8994	3.37873
1912	12.7364	21.011	4.18488
1913	13.1578	10.0159	3.96463
1914	22.483	16.9656	3.30444
1915	16.4182	19.7247	4.12793
1916	17.1515	7.17192	3.35098
1917	15.0831	16.24	3.53813
1918	20.1858	12.136	3.37565
1919	15.1223	17.8702	3.57149
1920	19.4815	8.69603	3.05556
1921	12.4391	16.3143	3.0616
1922	17.8248	14.9799	3.18691
1923	19.2548	19.6784	3.87676
1924	22.0224	11.322	3.00765
1925	18.5235	15.309	3.27642
1926	19.2167	10.1884	3.22207
1927	14.1266	9.5205	2.96086
1928	19.0925	19.5522	3.56098
1929	25.5516	13.7917	3.23487
1930	21.0638	15.4781	3.70963
1931	20.1336	14.1515	3.43332
1932	20.7835	18.9009	3.56296
1933	10.9369	14.5993	3.58831
1934	21.9548	20.2326	4.21712
1935	19.384	6.52285	3.75216
1936	20.5747	17.8394	3.93556
1937	17.8719	6.92653	3.70524
1938	15.5485	15.2094	3.37985
1939	16.9692	15.2892	3.66685
1940	8.25113	9.07894	3.68907
1941	8.08567	11.9267	4.18007
1942	23.274	17.7433	3.01413
1943	6.85432	24.5334	3.38331
1944	8.32172	15.2565	2.94364
1945	22.9045	17.8151	3.25501
1946	12.0913	13.7456	4.47324
1947	17.1206	17.3483	3.66979
1948	20.8474	18.2367	3.25045
1949	10.4147	12.8834	3.79062
1950	15.7245	17.1882	3.39798
1951	14.8489	11.7503	2.86862
1952	15.054	23.1723	4.06671
1953	17.4485	17.5297	3.44051
1954	19.6199	14.9311	3.20019
1955	22.3457	11.1598	4.02781
1956	12.8482	22.0398	3.48747
1957	14.8756	24.1512	3.53952
1958	12.1171	7.34969	2.96539
1959	11.4352	22.6418	3.30829
1960	18.8154	9.99425	3.37921
1961	10.5259	14.789	2.94781
1962	16.8242	16.8414	3.91011
1963	8.19606	11.7956	3.325
1964	10.126	21.1625	2.93889
1965	17.0083	10.9404	3.54883
1966	17.5796	16.7629	3.1895
1967	13.327	13.4719	3.40726
1968	15.1493	11.7483	2.88255
1969	17.4793	19.2901	2.97916
1970	15.5074	17.9525	3.10669
1971	15.8152	12.7976	3.50944
1972	23.2735	16.7939	3.32117
1973	12.3835	20.0028	3.53479
1974	11.1683	13.3218	2.91282
1975	12.8292	13.194	3.35399
1976	15.2904	9.77647	2.73642
1977	12.2159	12.2554	4.19535
1978	17.5453	7.82698	3.83801
1979	19.9712	16.8273	3.77161
1980	21.2748	11.6933	3.92883
1981	23.8872	15.8505	3.75345
1982	11.1541	20.8198	3.16367
1983	21.4497	16.1844	3.04489
1984	8.3724	22.461	4.00084
1985	20.8946	16.1214	3.26523
1986	16.8813	13.218	3.34477
1987	21.14	6.2775	3.14937
1988	12.5821	11.7092	3.66417
1989	18.5843	14.9726	2.7501
1990	17.5536	19.3451	3.56533
1991	20.1661	7.34374	3.33138
1992	21.8412	12.6989	3.50905
1993	20.3034	21.3789	4.12086
1994	19.0291	14.961	3.27886
1995	15.8362	16.8567	4.13433
1996	18.4098	16.6149	3.2404
1997	13.3216	16.6496	3.99351
1998	16.6226	21.4641	3.20659
1999	15.906	20.4313	3.1431
[truncated: 8,001 more rows]

## Sheet: Simulation Output Values 1
Sim #	ADD	ADDc	CR	HQ
1	2.65676e-05	1.28045e-06	8.53635e-07	0.0885586
2	6.80243e-05	3.2785e-06	2.18567e-06	0.226748
3	8.3323e-05	4.01584e-06	2.67723e-06	0.277743
4	3.51083e-05	1.69208e-06	1.12806e-06	0.117028
5	5.1119e-05	2.46373e-06	1.64249e-06	0.170397
6	6.42602e-05	3.09709e-06	2.06473e-06	0.214201
7	4.89003e-05	2.3568e-06	1.5712e-06	0.163001
8	4.49085e-05	2.16442e-06	1.44294e-06	0.149695
9	3.42513e-05	1.65078e-06	1.10052e-06	0.114171
10	6.28472e-05	3.02899e-06	2.01933e-06	0.209491
11	9.51132e-05	4.58408e-06	3.05606e-06	0.317044
12	4.7116e-05	2.27081e-06	1.51387e-06	0.157053
13	6.3157e-05	3.04392e-06	2.02928e-06	0.210523
14	0.000105328	5.07642e-06	3.38428e-06	0.351095
15	5.04618e-05	2.43206e-06	1.62137e-06	0.168206
16	5.63428e-05	2.7155e-06	1.81033e-06	0.187809
17	0.000103225	4.97504e-06	3.31669e-06	0.344083
18	6.66116e-05	3.21042e-06	2.14028e-06	0.222039
19	8.48101e-05	4.08751e-06	2.72501e-06	0.2827
20	4.40911e-05	2.12502e-06	1.41668e-06	0.14697
21	5.90978e-05	2.84828e-06	1.89885e-06	0.196993
22	3.21301e-05	1.54854e-06	1.03236e-06	0.1071
23	5.35723e-05	2.58197e-06	1.72132e-06	0.178574
24	7.62939e-05	3.67707e-06	2.45138e-06	0.254313
25	6.61488e-05	3.18811e-06	2.12541e-06	0.220496
26	7.73859e-05	3.72969e-06	2.48646e-06	0.257953
27	4.12931e-05	1.99017e-06	1.32678e-06	0.137644
28	6.10949e-05	2.94454e-06	1.96302e-06	0.20365
29	5.74879e-05	2.77069e-06	1.84713e-06	0.191626
30	5.40321e-05	2.60414e-06	1.73609e-06	0.180107
31	5.75189e-05	2.77219e-06	1.84812e-06	0.19173
32	9.17484e-05	4.42191e-06	2.94794e-06	0.305828
33	5.03731e-05	2.42778e-06	1.61852e-06	0.16791
34	2.31449e-05	1.1155e-06	7.43663e-07	0.0771498
35	6.84263e-05	3.29788e-06	2.19859e-06	0.228088
36	8.46585e-05	4.08021e-06	2.72014e-06	0.282195
37	0.000118396	5.70623e-06	3.80415e-06	0.394654
38	3.85656e-05	1.85871e-06	1.23914e-06	0.128552
39	3.44149e-05	1.65867e-06	1.10578e-06	0.114716
40	8.23812e-05	3.97045e-06	2.64697e-06	0.274604
41	3.50181e-05	1.68774e-06	1.12516e-06	0.116727
42	2.58811e-05	1.24737e-06	8.31578e-07	0.0862703
43	5.22546e-05	2.51847e-06	1.67898e-06	0.174182
44	6.4272e-05	3.09766e-06	2.06511e-06	0.21424
45	5.16194e-05	2.48785e-06	1.65857e-06	0.172065
46	2.78071e-05	1.34019e-06	8.93462e-07	0.0926904
47	4.23184e-05	2.03958e-06	1.35972e-06	0.141061
48	7.54493e-05	3.63636e-06	2.42424e-06	0.251498
49	6.80104e-05	3.27784e-06	2.18522e-06	0.226701
50	5.72366e-05	2.75858e-06	1.83905e-06	0.190789
51	7.37638e-05	3.55513e-06	2.37008e-06	0.245879
52	0.000103044	4.96632e-06	3.31088e-06	0.34348
53	5.28508e-05	2.5472e-06	1.69813e-06	0.176169
54	8.25886e-05	3.98045e-06	2.65363e-06	0.275295
55	0.000105813	5.09975e-06	3.39984e-06	0.352709
56	5.19138e-05	2.50204e-06	1.66803e-06	0.173046
57	5.70975e-05	2.75187e-06	1.83458e-06	0.190325
58	5.60107e-05	2.69949e-06	1.79966e-06	0.186702
59	4.32045e-05	2.08229e-06	1.38819e-06	0.144015
60	0.000112782	5.43563e-06	3.62375e-06	0.375938
61	9.1516e-05	4.41071e-06	2.94047e-06	0.305053
62	0.000103238	4.97567e-06	3.31711e-06	0.344127
63	4.17718e-05	2.01324e-06	1.34216e-06	0.139239
64	7.79859e-05	3.75861e-06	2.50574e-06	0.259953
65	5.95232e-05	2.86879e-06	1.91252e-06	0.198411
66	2.99375e-05	1.44287e-06	9.61913e-07	0.0997916
67	8.47561e-05	4.08491e-06	2.72327e-06	0.28252
68	5.36445e-05	2.58545e-06	1.72363e-06	0.178815
69	6.21842e-05	2.99704e-06	1.99802e-06	0.207281
70	5.90439e-05	2.84568e-06	1.89712e-06	0.196813
71	3.60019e-05	1.73515e-06	1.15677e-06	0.120006
72	3.0051e-05	1.44834e-06	9.65559e-07	0.10017
73	0.000156286	7.53235e-06	5.02157e-06	0.520952
74	5.38552e-05	2.59561e-06	1.73041e-06	0.179517
75	9.73998e-05	4.69429e-06	3.12953e-06	0.324666
76	2.10791e-05	1.01593e-06	6.77288e-07	0.0702638
77	9.21895e-05	4.44317e-06	2.96211e-06	0.307298
78	3.0214e-05	1.4562e-06	9.70797e-07	0.100713
79	6.37906e-05	3.07446e-06	2.04964e-06	0.212635
80	5.80062e-05	2.79567e-06	1.86378e-06	0.193354
81	8.27968e-05	3.99048e-06	2.66032e-06	0.275989
82	5.67205e-05	2.7337e-06	1.82247e-06	0.189068
83	5.41041e-05	2.60761e-06	1.7384e-06	0.180347
84	5.88719e-05	2.8374e-06	1.8916e-06	0.19624
85	2.4073e-05	1.16022e-06	7.73483e-07	0.0802433
86	4.39338e-05	2.11744e-06	1.41163e-06	0.146446
87	7.5391e-05	3.63355e-06	2.42237e-06	0.251303
88	3.09809e-05	1.49316e-06	9.95439e-07	0.10327
89	8.33425e-05	4.01678e-06	2.67785e-06	0.277808
90	5.54559e-05	2.67276e-06	1.78184e-06	0.184853
91	8.35119e-05	4.02495e-06	2.6833e-06	0.278373
92	3.74244e-05	1.80371e-06	1.20247e-06	0.124748
93	6.71169e-05	3.23477e-06	2.15651e-06	0.223723
94	5.16766e-05	2.49061e-06	1.66041e-06	0.172255
95	5.83312e-05	2.81134e-06	1.87422e-06	0.194437
96	0.000121776	5.86914e-06	3.91276e-06	0.405921
97	7.59271e-05	3.65939e-06	2.43959e-06	0.25309
98	3.57559e-05	1.72329e-06	1.14886e-06	0.119186
99	0.000111153	5.35714e-06	3.57143e-06	0.37051
100	6.8391e-05	3.29618e-06	2.19745e-06	0.22797
101	0.000161269	7.77255e-06	5.1817e-06	0.537564
102	4.94897e-05	2.38521e-06	1.59014e-06	0.164966
103	4.06916e-05	1.96118e-06	1.30745e-06	0.135639
104	9.70736e-05	4.67857e-06	3.11905e-06	0.323579
105	8.72853e-05	4.20681e-06	2.80454e-06	0.290951
106	4.31833e-05	2.08126e-06	1.38751e-06	0.143944
107	5.31719e-05	2.56268e-06	1.70845e-06	0.17724
108	5.75795e-05	2.77511e-06	1.85007e-06	0.191932
109	6.59883e-05	3.18037e-06	2.12025e-06	0.219961
110	5.07364e-05	2.44529e-06	1.6302e-06	0.169121
111	5.74542e-05	2.76907e-06	1.84604e-06	0.191514
112	9.61931e-05	4.63613e-06	3.09075e-06	0.320644
113	9.1854e-05	4.427e-06	2.95134e-06	0.30618
114	3.22658e-05	1.55508e-06	1.03672e-06	0.107553
115	5.49275e-05	2.64729e-06	1.76486e-06	0.183092
116	3.81507e-05	1.83871e-06	1.22581e-06	0.127169
117	6.36354e-05	3.06698e-06	2.04465e-06	0.212118
118	7.83858e-05	3.77789e-06	2.51859e-06	0.261286
119	0.000157818	7.60622e-06	5.07081e-06	0.526061
120	7.42281e-05	3.5775e-06	2.385e-06	0.247427
121	6.15661e-05	2.96724e-06	1.97816e-06	0.20522
122	3.70475e-05	1.78555e-06	1.19036e-06	0.123492
123	8.09993e-05	3.90385e-06	2.60257e-06	0.269998
124	3.48742e-05	1.6808e-06	1.12053e-06	0.116247
125	9.4738e-05	4.566e-06	3.044e-06	0.315793
126	7.47115e-05	3.6008e-06	2.40053e-06	0.249038
127	9.44913e-05	4.55411e-06	3.03607e-06	0.314971
128	4.09156e-05	1.97197e-06	1.31465e-06	0.136385
129	7.14812e-05	3.44511e-06	2.29674e-06	0.238271
130	4.74137e-05	2.28516e-06	1.52344e-06	0.158046
131	3.95001e-05	1.90375e-06	1.26917e-06	0.131667
132	4.52325e-05	2.18003e-06	1.45335e-06	0.150775
133	8.54772e-05	4.11966e-06	2.74644e-06	0.284924
134	4.28851e-05	2.06689e-06	1.37793e-06	0.14295
135	4.1317e-05	1.99132e-06	1.32755e-06	0.137723
136	8.66967e-05	4.17844e-06	2.78563e-06	0.288989
137	5.43737e-05	2.6206e-06	1.74706e-06	0.181246
138	5.74104e-05	2.76696e-06	1.84464e-06	0.191368
139	5.68725e-05	2.74103e-06	1.82735e-06	0.189575
140	6.3242e-05	3.04802e-06	2.03201e-06	0.210807
141	3.7532e-05	1.8089e-06	1.20593e-06	0.125107
142	0.000140743	6.78328e-06	4.52219e-06	0.469145
143	9.72164e-05	4.68545e-06	3.12363e-06	0.324055
144	0.000106219	5.11935e-06	3.4129e-06	0.354064
145	6.26684e-05	3.02037e-06	2.01358e-06	0.208895
146	7.2424e-05	3.49055e-06	2.32704e-06	0.241413
147	4.74847e-05	2.28858e-06	1.52572e-06	0.158282
148	4.94591e-05	2.38373e-06	1.58915e-06	0.164864
149	6.17054e-05	2.97396e-06	1.98264e-06	0.205685
150	6.17107e-05	2.97421e-06	1.98281e-06	0.205702
151	6.25649e-05	3.01538e-06	2.01026e-06	0.20855
152	5.40524e-05	2.60511e-06	1.73674e-06	0.180175
153	0.0001018	4.90636e-06	3.2709e-06	0.339333
154	6.04222e-05	2.91211e-06	1.94141e-06	0.201407
155	5.56053e-05	2.67996e-06	1.78664e-06	0.185351
156	6.72761e-05	3.24244e-06	2.16163e-06	0.224254
157	9.54036e-05	4.59808e-06	3.06539e-06	0.318012
158	5.15671e-05	2.48533e-06	1.65689e-06	0.17189
159	9.3771e-05	4.5194e-06	3.01293e-06	0.31257
160	7.38561e-05	3.55958e-06	2.37305e-06	0.246187
161	6.45739e-05	3.11221e-06	2.07481e-06	0.215246
162	7.80339e-05	3.76093e-06	2.50728e-06	0.260113
163	4.4823e-05	2.16029e-06	1.4402e-06	0.14941
164	2.45376e-05	1.18262e-06	7.8841e-07	0.0817919
165	5.19974e-05	2.50607e-06	1.67072e-06	0.173325
166	7.14529e-05	3.44375e-06	2.29583e-06	0.238176
167	4.49277e-05	2.16534e-06	1.44356e-06	0.149759
168	6.21669e-05	2.9962e-06	1.99747e-06	0.207223
169	3.64325e-05	1.7559e-06	1.1706e-06	0.121442
170	6.77207e-05	3.26387e-06	2.17592e-06	0.225736
171	6.01313e-05	2.89809e-06	1.93206e-06	0.200438
172	3.13842e-05	1.5126e-06	1.0084e-06	0.104614
173	9.55602e-05	4.60563e-06	3.07042e-06	0.318534
174	6.51793e-05	3.14139e-06	2.09426e-06	0.217264
175	0.000153139	7.38072e-06	4.92048e-06	0.510465
176	5.85677e-05	2.82273e-06	1.88182e-06	0.195226
177	7.83103e-05	3.77425e-06	2.51617e-06	0.261034
178	0.000118355	5.70423e-06	3.80282e-06	0.394515
179	4.79667e-05	2.31181e-06	1.5412e-06	0.159889
180	6.83057e-05	3.29207e-06	2.19471e-06	0.227686
181	3.15773e-05	1.5219e-06	1.0146e-06	0.105258
182	5.72302e-05	2.75827e-06	1.83885e-06	0.190767
183	9.30744e-05	4.48582e-06	2.99055e-06	0.310248
184	8.62256e-05	4.15573e-06	2.77049e-06	0.287419
185	6.57707e-05	3.16989e-06	2.11326e-06	0.219236
186	5.85437e-05	2.82157e-06	1.88105e-06	0.195146
187	8.23935e-05	3.97104e-06	2.64736e-06	0.274645
188	1.88519e-05	9.0859e-07	6.05726e-07	0.0628398
189	4.41307e-05	2.12693e-06	1.41795e-06	0.147102
190	3.40837e-05	1.6427e-06	1.09514e-06	0.113612
191	4.54819e-05	2.19205e-06	1.46137e-06	0.151606
192	4.6481e-05	2.2402e-06	1.49347e-06	0.154937
193	7.27113e-05	3.5044e-06	2.33627e-06	0.242371
194	7.01344e-05	3.3802e-06	2.25347e-06	0.233781
195	7.58648e-05	3.65638e-06	2.43759e-06	0.252883
196	2.24024e-05	1.07971e-06	7.19806e-07	0.0746748
197	3.72577e-05	1.79567e-06	1.19712e-06	0.124192
198	8.54288e-05	4.11734e-06	2.74489e-06	0.284763
199	5.72293e-05	2.75823e-06	1.83882e-06	0.190764
200	8.94806e-05	4.31262e-06	2.87508e-06	0.298269
201	3.72321e-05	1.79444e-06	1.19629e-06	0.124107
202	5.63926e-05	2.7179e-06	1.81193e-06	0.187975
203	6.02235e-05	2.90254e-06	1.93503e-06	0.200745
204	4.06322e-05	1.95831e-06	1.30554e-06	0.135441
205	3.71003e-05	1.78809e-06	1.19206e-06	0.123668
206	0.000107769	5.19404e-06	3.46269e-06	0.35923
207	5.85255e-05	2.8207e-06	1.88047e-06	0.195085
208	7.61446e-05	3.66987e-06	2.44658e-06	0.253815
209	4.95658e-05	2.38888e-06	1.59259e-06	0.165219
210	5.87045e-05	2.82933e-06	1.88622e-06	0.195682
211	3.9798e-05	1.91811e-06	1.27874e-06	0.13266
212	4.46036e-05	2.14972e-06	1.43314e-06	0.148679
213	8.75424e-05	4.2192e-06	2.8128e-06	0.291808
214	3.28271e-05	1.58214e-06	1.05476e-06	0.109424
215	6.77548e-05	3.26551e-06	2.17701e-06	0.225849
216	7.79328e-05	3.75606e-06	2.50404e-06	0.259776
217	0.000110219	5.31213e-06	3.54142e-06	0.367397
218	3.50805e-05	1.69074e-06	1.12716e-06	0.116935
219	5.78925e-05	2.79019e-06	1.86013e-06	0.192975
220	4.79844e-05	2.31266e-06	1.54177e-06	0.159948
221	5.62014e-05	2.70869e-06	1.80579e-06	0.187338
222	7.88534e-05	3.80042e-06	2.53361e-06	0.262845
223	0.000103371	4.98205e-06	3.32137e-06	0.344568
224	7.4212e-05	3.57673e-06	2.38449e-06	0.247373
225	0.000119168	5.74344e-06	3.82896e-06	0.397227
226	6.63684e-05	3.1987e-06	2.13246e-06	0.221228
227	0.000126592	6.10121e-06	4.06748e-06	0.421972
228	5.79623e-05	2.79355e-06	1.86237e-06	0.193208
229	8.51069e-05	4.10182e-06	2.73455e-06	0.28369
230	6.48218e-05	3.12416e-06	2.08277e-06	0.216073
231	7.55195e-05	3.63974e-06	2.4265e-06	0.251732
232	4.47964e-05	2.15901e-06	1.43934e-06	0.149321
233	7.27815e-05	3.50778e-06	2.33852e-06	0.242605
234	2.97204e-05	1.43241e-06	9.54937e-07	0.0990679
235	2.99286e-05	1.44244e-06	9.61626e-07	0.0997619
236	6.71802e-05	3.23782e-06	2.15855e-06	0.223934
237	4.81447e-05	2.32039e-06	1.54692e-06	0.160482
238	4.34869e-05	2.0959e-06	1.39726e-06	0.144956
239	6.11977e-05	2.94949e-06	1.96633e-06	0.203992
240	0.000101011	4.86833e-06	3.24556e-06	0.336703
241	5.83019e-05	2.80992e-06	1.87328e-06	0.19434
242	2.54103e-05	1.22468e-06	8.1645e-07	0.0847009
243	3.30886e-05	1.59474e-06	1.06316e-06	0.110295
244	8.81768e-05	4.24978e-06	2.83318e-06	0.293923
245	3.35547e-05	1.61721e-06	1.07814e-06	0.111849
246	6.46516e-05	3.11596e-06	2.0773e-06	0.215505
247	6.40951e-05	3.08913e-06	2.05942e-06	0.21365
248	7.83885e-05	3.77802e-06	2.51868e-06	0.261295
249	4.68206e-05	2.25657e-06	1.50438e-06	0.156069
250	7.02364e-05	3.38512e-06	2.25675e-06	0.234121
251	6.08331e-05	2.93191e-06	1.95461e-06	0.202777
252	4.65284e-05	2.24249e-06	1.49499e-06	0.155095
253	5.98165e-05	2.88292e-06	1.92195e-06	0.199388
254	0.000131133	6.32009e-06	4.21339e-06	0.43711
255	4.42399e-05	2.13219e-06	1.42146e-06	0.147466
256	6.54783e-05	3.1558e-06	2.10387e-06	0.218261
257	3.9635e-05	1.91025e-06	1.2735e-06	0.132117
258	0.000146288	7.0505e-06	4.70033e-06	0.487626
259	4.37523e-05	2.10869e-06	1.40579e-06	0.145841
260	5.98131e-05	2.88275e-06	1.92184e-06	0.199377
261	9.05256e-05	4.36298e-06	2.90865e-06	0.301752
262	3.10628e-05	1.4971e-06	9.9807e-07	0.103543
263	3.41605e-05	1.6464e-06	1.0976e-06	0.113868
264	4.46345e-05	2.15121e-06	1.43414e-06	0.148782
265	9.85619e-05	4.7503e-06	3.16686e-06	0.32854
266	5.14612e-05	2.48023e-06	1.65349e-06	0.171537
267	0.000106559	5.13571e-06	3.4238e-06	0.355195
268	7.06856e-05	3.40677e-06	2.27118e-06	0.235619
269	8.75981e-05	4.22188e-06	2.81459e-06	0.291994
270	8.14886e-05	3.92743e-06	2.61829e-06	0.271629
271	8.3488e-05	4.02379e-06	2.68253e-06	0.278293
272	5.50514e-05	2.65326e-06	1.76884e-06	0.183505
273	6.31863e-05	3.04533e-06	2.03022e-06	0.210621
274	0.000100086	4.82374e-06	3.21583e-06	0.333619
275	5.96369e-05	2.87427e-06	1.91618e-06	0.19879
276	0.000128104	6.1741e-06	4.11607e-06	0.427012
277	9.43581e-05	4.54769e-06	3.03179e-06	0.314527
278	8.14817e-05	3.9271e-06	2.61806e-06	0.271606
279	4.41063e-05	2.12575e-06	1.41717e-06	0.147021
280	5.31884e-05	2.56347e-06	1.70898e-06	0.177295
281	6.90348e-05	3.3272e-06	2.21814e-06	0.230116
282	5.8726e-05	2.83036e-06	1.88691e-06	0.195753
283	3.47236e-05	1.67354e-06	1.11569e-06	0.115745
284	5.36712e-05	2.58674e-06	1.72449e-06	0.178904
285	0.000137428	6.62351e-06	4.41567e-06	0.458095
286	7.53183e-05	3.63005e-06	2.42003e-06	0.251061
287	0.000140636	6.77809e-06	4.51873e-06	0.468786
288	5.97848e-05	2.88139e-06	1.92093e-06	0.199283
289	5.60268e-05	2.70027e-06	1.80018e-06	0.186756
290	5.19048e-05	2.50161e-06	1.66774e-06	0.173016
291	6.59991e-05	3.1809e-06	2.1206e-06	0.219997
292	3.87735e-05	1.86873e-06	1.24582e-06	0.129245
293	9.58761e-05	4.62085e-06	3.08057e-06	0.319587
294	0.000170217	8.20378e-06	5.46919e-06	0.567389
295	6.0556e-05	2.91856e-06	1.94571e-06	0.201853
296	5.67505e-05	2.73515e-06	1.82344e-06	0.189168
297	5.32949e-05	2.56861e-06	1.7124e-06	0.17765
298	6.26633e-05	3.02012e-06	2.01342e-06	0.208878
299	9.15682e-05	4.41323e-06	2.94215e-06	0.305227
300	6.77519e-05	3.26537e-06	2.17692e-06	0.22584
301	4.19157e-05	2.02017e-06	1.34678e-06	0.139719
302	6.30034e-05	3.03652e-06	2.02434e-06	0.210011
303	5.05299e-05	2.43534e-06	1.62356e-06	0.168433
304	5.27241e-05	2.54109e-06	1.69406e-06	0.175747
305	5.3551e-05	2.58095e-06	1.72063e-06	0.178503
306	7.37028e-05	3.55219e-06	2.36813e-06	0.245676
307	6.70896e-05	3.23346e-06	2.15564e-06	0.223632
308	4.20936e-05	2.02874e-06	1.3525e-06	0.140312
309	3.88858e-05	1.87414e-06	1.24943e-06	0.129619
310	0.000119136	5.74188e-06	3.82792e-06	0.39712
311	5.01185e-05	2.41551e-06	1.61034e-06	0.167062
312	5.77465e-05	2.78315e-06	1.85544e-06	0.192488
313	6.98416e-05	3.36609e-06	2.24406e-06	0.232805
314	7.18322e-05	3.46203e-06	2.30802e-06	0.239441
315	8.6117e-05	4.1505e-06	2.767e-06	0.287057
316	4.81392e-05	2.32012e-06	1.54675e-06	0.160464
317	7.92546e-05	3.81976e-06	2.54651e-06	0.264182
318	6.02967e-05	2.90606e-06	1.93738e-06	0.200989
319	5.36503e-05	2.58573e-06	1.72382e-06	0.178834
320	7.81886e-05	3.76838e-06	2.51226e-06	0.260629
321	6.23173e-05	3.00345e-06	2.0023e-06	0.207724
322	7.84438e-05	3.78068e-06	2.52046e-06	0.261479
323	5.55792e-05	2.6787e-06	1.7858e-06	0.185264
324	2.24364e-05	1.08134e-06	7.20896e-07	0.0747878
325	6.13419e-05	2.95644e-06	1.97096e-06	0.204473
326	0.000104822	5.052e-06	3.368e-06	0.349406
327	4.07087e-05	1.962e-06	1.308e-06	0.135696
328	6.46942e-05	3.11801e-06	2.07867e-06	0.215647
329	0.000108255	5.21749e-06	3.47832e-06	0.360851
330	3.58422e-05	1.72745e-06	1.15164e-06	0.119474
331	3.51188e-05	1.69259e-06	1.12839e-06	0.117063
332	7.20916e-05	3.47453e-06	2.31635e-06	0.240305
333	4.45341e-05	2.14637e-06	1.43091e-06	0.148447
334	5.56842e-05	2.68376e-06	1.78917e-06	0.185614
335	4.91392e-05	2.36832e-06	1.57888e-06	0.163797
336	6.63375e-05	3.19721e-06	2.13147e-06	0.221125
337	4.41486e-05	2.12779e-06	1.41853e-06	0.147162
338	6.9633e-05	3.35604e-06	2.23736e-06	0.23211
339	4.57688e-05	2.20588e-06	1.47059e-06	0.152563
340	8.45271e-05	4.07387e-06	2.71592e-06	0.281757
341	9.23703e-05	4.45188e-06	2.96792e-06	0.307901
342	0.000121008	5.83211e-06	3.88807e-06	0.40336
343	5.77035e-05	2.78108e-06	1.85406e-06	0.192345
344	2.76601e-05	1.33311e-06	8.88738e-07	0.0922002
345	0.000110599	5.33046e-06	3.55364e-06	0.368665
346	6.43721e-05	3.10248e-06	2.06832e-06	0.214574
347	5.27386e-05	2.5418e-06	1.69453e-06	0.175795
348	8.32236e-05	4.01105e-06	2.67403e-06	0.277412
349	5.74813e-05	2.77037e-06	1.84692e-06	0.191604
350	3.53551e-05	1.70398e-06	1.13598e-06	0.11785
351	0.000106866	5.15051e-06	3.43368e-06	0.356219
352	5.25744e-05	2.53388e-06	1.68925e-06	0.175248
353	6.06627e-05	2.9237e-06	1.94913e-06	0.202209
354	5.38461e-05	2.59517e-06	1.73012e-06	0.179487
355	6.23017e-05	3.0027e-06	2.0018e-06	0.207672
356	8.29028e-05	3.99559e-06	2.66373e-06	0.276343
357	9.13745e-05	4.40389e-06	2.93593e-06	0.304582
358	6.97478e-05	3.36157e-06	2.24105e-06	0.232493
359	7.90823e-05	3.81146e-06	2.54097e-06	0.263608
360	0.000103115	4.96975e-06	3.31316e-06	0.343717
361	4.52661e-05	2.18165e-06	1.45443e-06	0.150887
362	9.6801e-05	4.66543e-06	3.11029e-06	0.32267
363	6.56077e-05	3.16203e-06	2.10802e-06	0.218692
364	5.67421e-05	2.73475e-06	1.82316e-06	0.18914
365	7.04258e-05	3.39425e-06	2.26283e-06	0.234753
366	7.19388e-05	3.46717e-06	2.31145e-06	0.239796
367	8.93373e-05	4.30571e-06	2.87047e-06	0.297791
368	5.32092e-05	2.56448e-06	1.70965e-06	0.177364
369	3.99705e-05	1.92642e-06	1.28428e-06	0.133235
370	0.000104644	5.04343e-06	3.36229e-06	0.348813
371	4.78335e-05	2.30539e-06	1.53693e-06	0.159445
372	0.000131187	6.32268e-06	4.21512e-06	0.437289
373	9.46723e-05	4.56284e-06	3.04189e-06	0.315574
374	0.000126994	6.12063e-06	4.08042e-06	0.423315
375	0.00010486	5.05386e-06	3.36924e-06	0.349535
376	6.60881e-05	3.18519e-06	2.12346e-06	0.220294
377	0.000121405	5.85125e-06	3.90083e-06	0.404684
378	4.66992e-05	2.25072e-06	1.50048e-06	0.155664
379	6.55563e-05	3.15956e-06	2.10637e-06	0.218521
380	7.46047e-05	3.59565e-06	2.3971e-06	0.248682
381	7.42363e-05	3.5779e-06	2.38527e-06	0.247454
382	7.67045e-05	3.69685e-06	2.46457e-06	0.255682
383	9.17187e-05	4.42048e-06	2.94699e-06	0.305729
384	3.17737e-05	1.53137e-06	1.02091e-06	0.105912
385	3.98936e-05	1.92271e-06	1.28181e-06	0.132979
386	6.8706e-05	3.31136e-06	2.20757e-06	0.22902
387	7.51582e-05	3.62233e-06	2.41489e-06	0.250527
388	0.000124144	5.98326e-06	3.98884e-06	0.413814
389	5.45213e-05	2.62771e-06	1.75181e-06	0.181738
390	0.00013147	6.33635e-06	4.22423e-06	0.438234
391	8.04513e-05	3.87744e-06	2.58496e-06	0.268171
392	5.59801e-05	2.69802e-06	1.79868e-06	0.1866
393	4.36293e-05	2.10276e-06	1.40184e-06	0.145431
394	5.0733e-05	2.44513e-06	1.63009e-06	0.16911
395	3.97782e-05	1.91715e-06	1.2781e-06	0.132594
396	9.27215e-05	4.46881e-06	2.97921e-06	0.309072
397	5.18467e-05	2.49881e-06	1.66587e-06	0.172822
398	4.44313e-05	2.14142e-06	1.42761e-06	0.148104
399	5.11573e-05	2.46558e-06	1.64372e-06	0.170524
400	4.29696e-05	2.07097e-06	1.38065e-06	0.143232
401	5.54526e-05	2.6726e-06	1.78173e-06	0.184842
402	6.76161e-05	3.25883e-06	2.17255e-06	0.225387
403	7.88299e-05	3.79929e-06	2.53286e-06	0.262766
404	9.1678e-05	4.41852e-06	2.94568e-06	0.305593
405	3.94302e-05	1.90038e-06	1.26692e-06	0.131434
406	4.987e-05	2.40354e-06	1.60236e-06	0.166233
407	7.24202e-05	3.49037e-06	2.32691e-06	0.241401
408	5.30238e-05	2.55554e-06	1.70369e-06	0.176746
409	2.45366e-05	1.18257e-06	7.88379e-07	0.0817888
410	0.000120116	5.78913e-06	3.85942e-06	0.400387
411	6.271e-05	3.02237e-06	2.01492e-06	0.209033
412	4.35571e-05	2.09928e-06	1.39952e-06	0.14519
413	3.87139e-05	1.86586e-06	1.24391e-06	0.129046
414	9.46158e-05	4.56011e-06	3.04007e-06	0.315386
415	6.0847e-05	2.93259e-06	1.95506e-06	0.202823
416	5.10688e-05	2.46132e-06	1.64088e-06	0.170229
417	8.41516e-05	4.05578e-06	2.70385e-06	0.280505
418	7.53634e-05	3.63222e-06	2.42148e-06	0.251211
419	6.65196e-05	3.20598e-06	2.13732e-06	0.221732
420	0.000102118	4.92168e-06	3.28112e-06	0.340393
421	9.61326e-05	4.63321e-06	3.08881e-06	0.320442
422	4.01495e-05	1.93505e-06	1.29003e-06	0.133832
423	3.63001e-05	1.74952e-06	1.16635e-06	0.121
424	3.81099e-05	1.83675e-06	1.2245e-06	0.127033
425	8.17824e-05	3.94159e-06	2.62773e-06	0.272608
426	0.000132862	6.40343e-06	4.26895e-06	0.442873
427	2.94334e-05	1.41858e-06	9.45717e-07	0.0981114
428	4.59839e-05	2.21625e-06	1.4775e-06	0.15328
429	3.53602e-05	1.70422e-06	1.13615e-06	0.117867
430	5.15388e-05	2.48397e-06	1.65598e-06	0.171796
431	8.08544e-05	3.89687e-06	2.59791e-06	0.269515
432	0.000111209	5.35985e-06	3.57324e-06	0.370698
433	3.1752e-05	1.53032e-06	1.02022e-06	0.10584
434	6.3655e-05	3.06792e-06	2.04528e-06	0.212183
435	4.4538e-05	2.14656e-06	1.43104e-06	0.14846
436	4.61632e-05	2.22489e-06	1.48326e-06	0.153877
437	6.57593e-05	3.16934e-06	2.11289e-06	0.219198
438	4.8511e-05	2.33804e-06	1.55869e-06	0.161703
439	7.02229e-05	3.38447e-06	2.25631e-06	0.234076
440	8.32531e-05	4.01247e-06	2.67498e-06	0.27751
441	6.19461e-05	2.98556e-06	1.99037e-06	0.206487
442	7.09689e-05	3.42042e-06	2.28028e-06	0.236563
443	6.44847e-05	3.10791e-06	2.07194e-06	0.214949
444	0.000101674	4.90028e-06	3.26685e-06	0.338913
445	8.82044e-05	4.2511e-06	2.83407e-06	0.294015
446	5.7719e-05	2.78183e-06	1.85455e-06	0.192397
447	2.80139e-05	1.35016e-06	9.00107e-07	0.0933797
448	0.000107875	5.19917e-06	3.46611e-06	0.359584
449	4.61958e-05	2.22646e-06	1.48431e-06	0.153986
450	6.29326e-05	3.0331e-06	2.02207e-06	0.209775
451	4.46206e-05	2.15054e-06	1.43369e-06	0.148735
452	0.000111212	5.35997e-06	3.57331e-06	0.370706
453	6.10043e-05	2.94017e-06	1.96011e-06	0.203348
454	6.13277e-05	2.95575e-06	1.9705e-06	0.204426
455	0.000215715	1.03966e-05	6.93107e-06	0.71905
456	7.82795e-05	3.77277e-06	2.51518e-06	0.260932
457	0.000143334	6.90814e-06	4.60543e-06	0.47778
458	3.35846e-05	1.61865e-06	1.0791e-06	0.111949
459	2.89765e-05	1.39655e-06	9.31035e-07	0.0965883
460	7.79155e-05	3.75522e-06	2.50348e-06	0.259718
461	4.16468e-05	2.00721e-06	1.33814e-06	0.138823
462	0.000117503	5.6632e-06	3.77547e-06	0.391678
463	7.77167e-05	3.74564e-06	2.49709e-06	0.259056
464	4.14795e-05	1.99915e-06	1.33277e-06	0.138265
465	3.96537e-05	1.91115e-06	1.2741e-06	0.132179
466	3.22984e-05	1.55665e-06	1.03777e-06	0.107661
467	7.47816e-05	3.60418e-06	2.40279e-06	0.249272
468	5.84524e-05	2.81718e-06	1.87812e-06	0.194841
469	5.21582e-05	2.51382e-06	1.67588e-06	0.173861
470	0.000112211	5.40813e-06	3.60542e-06	0.374036
471	4.44119e-05	2.14048e-06	1.42699e-06	0.14804
472	6.69709e-05	3.22774e-06	2.15182e-06	0.223236
473	9.45439e-05	4.55664e-06	3.03776e-06	0.315146
474	4.88854e-05	2.35609e-06	1.57072e-06	0.162951
475	9.21934e-05	4.44336e-06	2.96224e-06	0.307311
476	9.48573e-05	4.57175e-06	3.04783e-06	0.316191
477	9.62273e-05	4.63778e-06	3.09185e-06	0.320758
478	0.000140143	6.75432e-06	4.50288e-06	0.467142
479	0.000153694	7.40746e-06	4.9383e-06	0.512314
480	5.91779e-05	2.85214e-06	1.90143e-06	0.19726
481	2.73497e-05	1.31815e-06	8.78767e-07	0.0911658
482	3.67674e-05	1.77204e-06	1.18136e-06	0.122558
483	4.30326e-05	2.074e-06	1.38267e-06	0.143442
484	3.28307e-05	1.58231e-06	1.05487e-06	0.109436
485	8.17356e-05	3.93933e-06	2.62622e-06	0.272452
486	5.63723e-05	2.71692e-06	1.81128e-06	0.187908
487	6.83399e-05	3.29372e-06	2.19581e-06	0.2278
488	3.79785e-05	1.83041e-06	1.22028e-06	0.126595
489	4.96524e-05	2.39305e-06	1.59537e-06	0.165508
490	7.36135e-05	3.54788e-06	2.36525e-06	0.245378
491	6.68663e-05	3.2227e-06	2.14846e-06	0.222888
492	6.32241e-05	3.04716e-06	2.03144e-06	0.210747
493	7.8364e-05	3.77684e-06	2.51789e-06	0.261213
494	3.72826e-05	1.79687e-06	1.19792e-06	0.124275
495	0.00012284	5.9204e-06	3.94693e-06	0.409466
496	6.73672e-05	3.24683e-06	2.16456e-06	0.224557
497	6.28242e-05	3.02788e-06	2.01859e-06	0.209414
498	6.13327e-05	2.95599e-06	1.97066e-06	0.204442
499	4.9719e-05	2.39626e-06	1.59751e-06	0.16573
500	4.55264e-05	2.1942e-06	1.4628e-06	0.151755
501	8.55239e-05	4.12192e-06	2.74794e-06	0.28508
502	5.30054e-05	2.55465e-06	1.7031e-06	0.176685
503	7.22757e-05	3.4834e-06	2.32227e-06	0.240919
504	5.82041e-05	2.80521e-06	1.87014e-06	0.194014
505	6.66731e-05	3.21338e-06	2.14225e-06	0.222244
506	8.05934e-05	3.88429e-06	2.58952e-06	0.268645
507	4.11732e-05	1.98439e-06	1.32292e-06	0.137244
508	6.89869e-05	3.3249e-06	2.2166e-06	0.229956
509	4.2363e-05	2.04173e-06	1.36115e-06	0.14121
510	0.000117453	5.66075e-06	3.77383e-06	0.391508
511	6.46293e-05	3.11488e-06	2.07658e-06	0.215431
512	8.42235e-05	4.05924e-06	2.70616e-06	0.280745
513	0.000113759	5.48273e-06	3.65515e-06	0.379196
514	5.56092e-05	2.68014e-06	1.78676e-06	0.185364
515	5.45381e-05	2.62852e-06	1.75235e-06	0.181794
516	2.99571e-05	1.44382e-06	9.62544e-07	0.099857
517	6.62113e-05	3.19112e-06	2.12742e-06	0.220704
518	6.72474e-05	3.24106e-06	2.16071e-06	0.224158
519	6.64607e-05	3.20314e-06	2.13543e-06	0.221536
520	2.57874e-05	1.24285e-06	8.28569e-07	0.0859581
521	6.65449e-05	3.2072e-06	2.13814e-06	0.221816
522	6.90509e-05	3.32798e-06	2.21866e-06	0.23017
523	5.18628e-05	2.49958e-06	1.66639e-06	0.172876
524	2.10574e-05	1.01489e-06	6.7659e-07	0.0701914
525	4.82734e-05	2.32659e-06	1.55106e-06	0.160911
526	4.40671e-05	2.12386e-06	1.41591e-06	0.14689
527	9.17518e-05	4.42208e-06	2.94805e-06	0.305839
528	6.02004e-05	2.90143e-06	1.93428e-06	0.200668
529	7.68258e-05	3.7027e-06	2.46847e-06	0.256086
530	3.41131e-05	1.64412e-06	1.09608e-06	0.11371
531	7.94166e-05	3.82757e-06	2.55171e-06	0.264722
532	7.40504e-05	3.56894e-06	2.37929e-06	0.246835
533	4.7271e-05	2.27828e-06	1.51885e-06	0.15757
534	5.60542e-05	2.70159e-06	1.80106e-06	0.186847
535	0.000100632	4.85007e-06	3.23338e-06	0.33544
536	5.38008e-05	2.59299e-06	1.72866e-06	0.179336
537	7.70814e-05	3.71502e-06	2.47668e-06	0.256938
538	7.51975e-05	3.62422e-06	2.41615e-06	0.250658
539	7.85512e-05	3.78586e-06	2.52391e-06	0.261837
540	0.000105383	5.07903e-06	3.38602e-06	0.351275
541	5.35938e-05	2.58301e-06	1.72201e-06	0.178646
542	7.07835e-05	3.41148e-06	2.27432e-06	0.235945
543	8.26618e-05	3.98397e-06	2.65598e-06	0.275539
544	4.39451e-05	2.11798e-06	1.41199e-06	0.146484
545	3.83398e-05	1.84783e-06	1.23189e-06	0.127799
546	4.45196e-05	2.14567e-06	1.43045e-06	0.148399
547	2.43184e-05	1.17205e-06	7.81367e-07	0.0810613
548	0.000154973	7.46909e-06	4.97939e-06	0.516576
549	5.84811e-05	2.81856e-06	1.87904e-06	0.194937
550	6.00854e-05	2.89588e-06	1.93059e-06	0.200285
551	6.92214e-05	3.3362e-06	2.22413e-06	0.230738
552	5.61565e-05	2.70652e-06	1.80435e-06	0.187188
553	6.42895e-05	3.0985e-06	2.06567e-06	0.214298
554	5.59971e-05	2.69884e-06	1.79923e-06	0.186657
555	5.33879e-05	2.57309e-06	1.71539e-06	0.17796
556	5.58981e-05	2.69407e-06	1.79604e-06	0.186327
557	5.5368e-05	2.66852e-06	1.77901e-06	0.18456
558	5.41611e-05	2.61035e-06	1.74024e-06	0.180537
559	7.68929e-05	3.70594e-06	2.47063e-06	0.25631
560	3.47464e-05	1.67464e-06	1.11643e-06	0.115821
561	3.43744e-05	1.65671e-06	1.10447e-06	0.114581
562	4.90389e-05	2.36348e-06	1.57565e-06	0.163463
563	8.40527e-05	4.05101e-06	2.70067e-06	0.280176
564	5.14668e-05	2.4805e-06	1.65366e-06	0.171556
565	0.000124179	5.98492e-06	3.98995e-06	0.413928
566	6.99712e-05	3.37234e-06	2.24822e-06	0.233237
567	0.000134348	6.47506e-06	4.31671e-06	0.447828
568	5.84775e-05	2.81838e-06	1.87892e-06	0.194925
569	6.39731e-05	3.08325e-06	2.0555e-06	0.213244
570	6.35293e-05	3.06187e-06	2.04124e-06	0.211764
571	3.04025e-05	1.46528e-06	9.76853e-07	0.101342
572	5.72079e-05	2.75719e-06	1.83813e-06	0.190693
573	4.5488e-05	2.19234e-06	1.46156e-06	0.151627
574	7.24082e-05	3.48979e-06	2.32653e-06	0.241361
575	5.36351e-05	2.585e-06	1.72333e-06	0.178784
576	7.42269e-05	3.57745e-06	2.38496e-06	0.247423
577	7.00778e-05	3.37748e-06	2.25165e-06	0.233593
578	4.82278e-05	2.32439e-06	1.54959e-06	0.160759
579	7.11756e-05	3.43039e-06	2.28692e-06	0.237252
580	3.55801e-05	1.71482e-06	1.14322e-06	0.1186
581	5.5466e-05	2.67324e-06	1.78216e-06	0.184887
582	9.47889e-05	4.56845e-06	3.04563e-06	0.315963
583	5.93985e-05	2.86277e-06	1.90852e-06	0.197995
584	5.51248e-05	2.6568e-06	1.7712e-06	0.183749
585	5.83717e-05	2.81329e-06	1.87552e-06	0.194572
586	6.16565e-05	2.9716e-06	1.98107e-06	0.205522
587	4.01737e-05	1.93622e-06	1.29081e-06	0.133912
588	3.35631e-05	1.61761e-06	1.07841e-06	0.111877
589	5.10524e-05	2.46052e-06	1.64035e-06	0.170175
590	3.77996e-05	1.82179e-06	1.21453e-06	0.125999
591	3.91605e-05	1.88738e-06	1.25825e-06	0.130535
592	9.05342e-05	4.36339e-06	2.90893e-06	0.301781
593	3.02583e-05	1.45833e-06	9.72222e-07	0.100861
594	3.29583e-05	1.58846e-06	1.05898e-06	0.109861
595	9.38198e-05	4.52175e-06	3.0145e-06	0.312733
596	3.74714e-05	1.80598e-06	1.20398e-06	0.124905
597	5.43839e-05	2.62109e-06	1.7474e-06	0.18128
598	7.12936e-05	3.43607e-06	2.29071e-06	0.237645
599	4.28856e-05	2.06692e-06	1.37794e-06	0.142952
600	2.82237e-05	1.36027e-06	9.06848e-07	0.094079
601	0.000102152	4.92333e-06	3.28222e-06	0.340507
602	4.0278e-05	1.94124e-06	1.29416e-06	0.13426
603	5.42143e-05	2.61292e-06	1.74195e-06	0.180714
604	4.4448e-05	2.14222e-06	1.42815e-06	0.14816
605	5.74016e-05	2.76653e-06	1.84435e-06	0.191339
606	5.51845e-05	2.65967e-06	1.77312e-06	0.183948
607	8.45236e-05	4.07371e-06	2.7158e-06	0.281745
608	5.62327e-05	2.7102e-06	1.8068e-06	0.187442
609	3.41564e-05	1.64621e-06	1.09747e-06	0.113855
610	6.69585e-05	3.22713e-06	2.15142e-06	0.223195
611	0.000129428	6.23792e-06	4.15862e-06	0.431427
612	3.66143e-05	1.76466e-06	1.17644e-06	0.122048
613	3.52599e-05	1.69939e-06	1.13293e-06	0.117533
614	4.76881e-05	2.29838e-06	1.53225e-06	0.15896
615	6.69457e-05	3.22652e-06	2.15101e-06	0.223152
616	5.12134e-05	2.46828e-06	1.64552e-06	0.170711
617	7.16304e-05	3.4523e-06	2.30154e-06	0.238768
618	6.09848e-05	2.93923e-06	1.95949e-06	0.203283
619	0.00010134	4.88421e-06	3.25614e-06	0.337801
620	5.192e-05	2.50234e-06	1.66823e-06	0.173067
621	7.41237e-05	3.57247e-06	2.38165e-06	0.247079
622	8.18996e-05	3.94724e-06	2.63149e-06	0.272999
623	8.17342e-05	3.93927e-06	2.62618e-06	0.272447
624	5.0719e-05	2.44446e-06	1.62964e-06	0.169063
625	3.75045e-05	1.80757e-06	1.20505e-06	0.125015
626	5.68187e-05	2.73844e-06	1.82562e-06	0.189396
627	7.53223e-05	3.63024e-06	2.42016e-06	0.251074
628	7.24377e-05	3.49121e-06	2.32748e-06	0.241459
629	5.73589e-05	2.76447e-06	1.84298e-06	0.191196
630	0.000108358	5.22243e-06	3.48162e-06	0.361194
631	6.15471e-05	2.96633e-06	1.97755e-06	0.205157
632	7.32729e-05	3.53146e-06	2.35431e-06	0.244243
633	5.55696e-05	2.67824e-06	1.78549e-06	0.185232
634	5.49296e-05	2.64739e-06	1.76493e-06	0.183099
635	6.68451e-05	3.22167e-06	2.14778e-06	0.222817
636	6.36648e-05	3.06839e-06	2.0456e-06	0.212216
637	3.1752e-05	1.53032e-06	1.02022e-06	0.10584
638	4.37636e-05	2.10923e-06	1.40616e-06	0.145879
639	4.62398e-05	2.22858e-06	1.48572e-06	0.154133
640	7.81686e-05	3.76742e-06	2.51161e-06	0.260562
641	7.66468e-05	3.69407e-06	2.46272e-06	0.255489
642	6.96573e-05	3.35721e-06	2.23814e-06	0.232191
643	6.5529e-05	3.15824e-06	2.10549e-06	0.21843
644	5.71845e-05	2.75607e-06	1.83738e-06	0.190615
645	3.2221e-05	1.55293e-06	1.03529e-06	0.107403
646	7.42887e-05	3.58042e-06	2.38695e-06	0.247629
647	4.69008e-05	2.26044e-06	1.50696e-06	0.156336
648	8.47671e-05	4.08544e-06	2.72363e-06	0.282557
649	5.5277e-05	2.66414e-06	1.77609e-06	0.184257
650	4.143e-05	1.99677e-06	1.33118e-06	0.1381
651	3.94657e-05	1.90209e-06	1.26806e-06	0.131552
652	3.90781e-05	1.88341e-06	1.25561e-06	0.13026
653	5.61561e-05	2.70651e-06	1.80434e-06	0.187187
654	6.44409e-05	3.1058e-06	2.07053e-06	0.214803
655	5.31555e-05	2.56189e-06	1.70792e-06	0.177185
656	3.49678e-05	1.68531e-06	1.12354e-06	0.116559
657	0.000105801	5.09919e-06	3.39946e-06	0.35267
658	5.28162e-05	2.54553e-06	1.69702e-06	0.176054
659	4.42338e-05	2.13189e-06	1.42126e-06	0.147446
660	4.97337e-05	2.39697e-06	1.59798e-06	0.165779
661	0.000110682	5.33445e-06	3.5563e-06	0.368941
662	5.50423e-05	2.65282e-06	1.76855e-06	0.183474
663	8.10274e-05	3.9052e-06	2.60347e-06	0.270091
664	5.69951e-05	2.74694e-06	1.83129e-06	0.189984
665	5.42709e-05	2.61565e-06	1.74376e-06	0.180903
666	0.00010904	5.25531e-06	3.50354e-06	0.363468
667	5.75922e-05	2.77572e-06	1.85048e-06	0.191974
668	4.81466e-05	2.32048e-06	1.54699e-06	0.160489
669	4.79906e-05	2.31296e-06	1.54197e-06	0.159969
670	8.08826e-05	3.89823e-06	2.59882e-06	0.269609
671	6.31246e-05	3.04236e-06	2.02824e-06	0.210415
672	8.41778e-05	4.05704e-06	2.70469e-06	0.280593
673	0.000102039	4.91788e-06	3.27859e-06	0.34013
674	0.000110043	5.30366e-06	3.53577e-06	0.366811
675	7.18055e-05	3.46074e-06	2.30716e-06	0.239352
676	7.07724e-05	3.41095e-06	2.27397e-06	0.235908
677	0.000130849	6.30643e-06	4.20428e-06	0.436165
678	5.80917e-05	2.79979e-06	1.86653e-06	0.193639
679	5.57159e-05	2.68529e-06	1.79019e-06	0.18572
680	6.13308e-05	2.9559e-06	1.9706e-06	0.204436
681	3.16287e-05	1.52438e-06	1.01625e-06	0.105429
682	7.13366e-05	3.43815e-06	2.2921e-06	0.237789
683	4.54621e-05	2.1911e-06	1.46073e-06	0.15154
684	7.56723e-05	3.64711e-06	2.4314e-06	0.252241
685	6.28739e-05	3.03028e-06	2.02018e-06	0.20958
686	9.68907e-05	4.66975e-06	3.11317e-06	0.322969
687	7.91856e-05	3.81644e-06	2.54429e-06	0.263952
688	6.24962e-05	3.01207e-06	2.00805e-06	0.208321
689	8.65393e-05	4.17086e-06	2.78057e-06	0.288464
690	4.94796e-05	2.38472e-06	1.58981e-06	0.164932
691	6.30676e-05	3.03961e-06	2.02641e-06	0.210225
692	4.74764e-05	2.28818e-06	1.52545e-06	0.158255
693	5.59917e-05	2.69858e-06	1.79905e-06	0.186639
694	7.64509e-05	3.68463e-06	2.45642e-06	0.254836
695	5.87065e-05	2.82942e-06	1.88628e-06	0.195688
696	9.3352e-05	4.4992e-06	2.99947e-06	0.311173
697	5.96227e-05	2.87358e-06	1.91572e-06	0.198742
698	4.6798e-05	2.25548e-06	1.50365e-06	0.155993
699	4.79324e-05	2.31015e-06	1.5401e-06	0.159775
700	4.40403e-05	2.12257e-06	1.41505e-06	0.146801
701	6.99655e-05	3.37206e-06	2.24804e-06	0.233218
702	0.000140872	6.7895e-06	4.52633e-06	0.469575
703	6.04316e-05	2.91257e-06	1.94171e-06	0.201439
704	4.16515e-05	2.00744e-06	1.33829e-06	0.138838
705	3.8767e-05	1.86842e-06	1.24561e-06	0.129223
706	7.90095e-05	3.80795e-06	2.53863e-06	0.263365
707	5.31963e-05	2.56385e-06	1.70923e-06	0.177321
708	8.05073e-05	3.88014e-06	2.58676e-06	0.268358
709	3.4993e-05	1.68652e-06	1.12435e-06	0.116643
710	5.29796e-05	2.55341e-06	1.70227e-06	0.176599
711	6.01792e-05	2.9004e-06	1.9336e-06	0.200597
712	5.73733e-05	2.76517e-06	1.84345e-06	0.191244
713	9.31597e-05	4.48993e-06	2.99329e-06	0.310532
714	8.43228e-05	4.06403e-06	2.70935e-06	0.281076
715	8.91636e-05	4.29734e-06	2.86489e-06	0.297212
716	6.41057e-05	3.08964e-06	2.05976e-06	0.213686
717	4.1945e-05	2.02158e-06	1.34772e-06	0.139817
718	6.34655e-05	3.05879e-06	2.03919e-06	0.211552
719	3.02425e-05	1.45757e-06	9.71713e-07	0.100808
720	7.5729e-05	3.64984e-06	2.43323e-06	0.25243
721	0.000177424	8.55115e-06	5.70076e-06	0.591414
722	8.19575e-05	3.95003e-06	2.63335e-06	0.273192
723	5.5139e-05	2.65748e-06	1.77166e-06	0.183797
724	5.66951e-05	2.73248e-06	1.82165e-06	0.188984
725	7.04103e-05	3.3935e-06	2.26233e-06	0.234701
726	6.34601e-05	3.05853e-06	2.03902e-06	0.211534
727	2.63222e-05	1.26862e-06	8.4575e-07	0.0877405
728	7.53285e-05	3.63054e-06	2.42036e-06	0.251095
729	8.4309e-05	4.06336e-06	2.70891e-06	0.28103
730	7.48169e-05	3.60588e-06	2.40392e-06	0.24939
731	6.55276e-05	3.15817e-06	2.10545e-06	0.218425
732	7.55057e-05	3.63908e-06	2.42605e-06	0.251686
733	4.6551e-05	2.24358e-06	1.49572e-06	0.15517
734	4.26931e-05	2.05764e-06	1.37176e-06	0.14231
735	7.3416e-05	3.53836e-06	2.35891e-06	0.24472
736	9.38531e-05	4.52335e-06	3.01557e-06	0.312844
737	3.81392e-05	1.83816e-06	1.22544e-06	0.127131
738	4.87586e-05	2.34997e-06	1.56665e-06	0.162529
739	4.25617e-05	2.05131e-06	1.36754e-06	0.141872
740	7.92863e-05	3.82129e-06	2.54753e-06	0.264288
741	2.55058e-05	1.22928e-06	8.19519e-07	0.0850192
742	6.02676e-05	2.90466e-06	1.93644e-06	0.200892
743	9.43504e-05	4.54732e-06	3.03155e-06	0.314501
744	0.000128039	6.17098e-06	4.11399e-06	0.426797
745	9.42088e-05	4.5405e-06	3.027e-06	0.314029
746	7.56541e-05	3.64623e-06	2.43082e-06	0.25218
747	8.17178e-05	3.93848e-06	2.62565e-06	0.272393
748	2.92729e-05	1.41084e-06	9.4056e-07	0.0975764
749	5.90772e-05	2.84729e-06	1.89819e-06	0.196924
750	3.62919e-05	1.74913e-06	1.16609e-06	0.120973
751	3.33736e-05	1.60848e-06	1.07232e-06	0.111245
752	0.00011261	5.42736e-06	3.61824e-06	0.375367
753	6.81657e-05	3.28532e-06	2.19021e-06	0.227219
754	7.77215e-05	3.74587e-06	2.49725e-06	0.259072
755	4.56129e-05	2.19836e-06	1.46557e-06	0.152043
756	8.51057e-05	4.10176e-06	2.73451e-06	0.283686
757	7.92577e-05	3.81991e-06	2.54661e-06	0.264192
758	5.77191e-05	2.78183e-06	1.85456e-06	0.192397
759	7.3473e-05	3.54111e-06	2.36074e-06	0.24491
760	7.60125e-05	3.66351e-06	2.44234e-06	0.253375
761	0.000144796	6.97862e-06	4.65241e-06	0.482655
762	4.75208e-05	2.29031e-06	1.52688e-06	0.158403
763	0.000117359	5.65626e-06	3.77084e-06	0.391198
764	3.8409e-05	1.85116e-06	1.23411e-06	0.12803
765	5.59545e-05	2.69679e-06	1.79786e-06	0.186515
766	0.000105211	5.07078e-06	3.38052e-06	0.350705
767	8.02356e-05	3.86704e-06	2.57803e-06	0.267452
768	7.70337e-05	3.71272e-06	2.47515e-06	0.256779
769	8.22525e-05	3.96425e-06	2.64283e-06	0.274175
770	3.78447e-05	1.82397e-06	1.21598e-06	0.126149
771	0.000121106	5.83685e-06	3.89123e-06	0.403688
772	7.33376e-05	3.53459e-06	2.35639e-06	0.244459
773	6.60676e-05	3.1842e-06	2.1228e-06	0.220225
774	2.71775e-05	1.30985e-06	8.73233e-07	0.0905917
775	5.24549e-05	2.52812e-06	1.68542e-06	0.17485
776	6.34909e-05	3.06001e-06	2.04001e-06	0.211636
777	0.000199887	9.63379e-06	6.42252e-06	0.666291
778	3.83454e-05	1.8481e-06	1.23206e-06	0.127818
779	9.77043e-05	4.70896e-06	3.13931e-06	0.325681
780	4.36638e-05	2.10442e-06	1.40295e-06	0.145546
781	0.000120116	5.78911e-06	3.85941e-06	0.400386
782	7.72611e-05	3.72368e-06	2.48245e-06	0.257537
783	5.16118e-05	2.48749e-06	1.65833e-06	0.172039
784	7.2473e-05	3.49291e-06	2.32861e-06	0.241577
785	0.000123415	5.9481e-06	3.9654e-06	0.411382
786	7.10355e-05	3.42363e-06	2.28242e-06	0.236785
787	5.21919e-05	2.51544e-06	1.67696e-06	0.173973
788	7.80247e-05	3.76049e-06	2.50699e-06	0.260082
789	3.45529e-05	1.66531e-06	1.11021e-06	0.115176
790	4.92625e-05	2.37426e-06	1.58284e-06	0.164208
791	7.13576e-05	3.43916e-06	2.29277e-06	0.237859
792	3.90422e-05	1.88168e-06	1.25445e-06	0.130141
793	2.46296e-05	1.18705e-06	7.91366e-07	0.0820986
794	4.34643e-05	2.09481e-06	1.39654e-06	0.144881
795	5.28382e-05	2.5466e-06	1.69773e-06	0.176127
796	8.48012e-05	4.08709e-06	2.72472e-06	0.282671
797	0.000100382	4.838e-06	3.22534e-06	0.334606
798	4.10361e-05	1.97778e-06	1.31852e-06	0.136787
799	3.98639e-05	1.92128e-06	1.28086e-06	0.13288
800	6.24724e-05	3.01092e-06	2.00728e-06	0.208241
801	5.12625e-05	2.47065e-06	1.6471e-06	0.170875
802	6.15529e-05	2.96661e-06	1.97774e-06	0.205176
803	5.97073e-05	2.87766e-06	1.91844e-06	0.199024
804	4.47378e-05	2.15619e-06	1.43746e-06	0.149126
805	8.76389e-05	4.22385e-06	2.8159e-06	0.29213
806	3.7542e-05	1.80938e-06	1.20625e-06	0.12514
807	1.8944e-05	9.13028e-07	6.08685e-07	0.0631468
808	7.42588e-05	3.57899e-06	2.38599e-06	0.247529
809	4.80226e-05	2.3145e-06	1.543e-06	0.160075
810	4.30694e-05	2.07578e-06	1.38385e-06	0.143565
811	6.00217e-05	2.89281e-06	1.92854e-06	0.200072
812	5.81089e-05	2.80062e-06	1.86708e-06	0.193696
813	5.13575e-05	2.47523e-06	1.65015e-06	0.171192
814	5.60575e-05	2.70175e-06	1.80117e-06	0.186858
815	8.57167e-05	4.13121e-06	2.75414e-06	0.285722
816	5.36948e-05	2.58788e-06	1.72525e-06	0.178983
817	5.48328e-05	2.64272e-06	1.76182e-06	0.182776
818	4.50255e-05	2.17005e-06	1.4467e-06	0.150085
819	5.75635e-05	2.77433e-06	1.84956e-06	0.191878
820	7.82185e-05	3.76982e-06	2.51322e-06	0.260728
821	6.08646e-05	2.93343e-06	1.95562e-06	0.202882
822	5.23993e-05	2.52544e-06	1.68363e-06	0.174664
823	0.000138964	6.69751e-06	4.46501e-06	0.463213
824	4.42462e-05	2.13249e-06	1.42166e-06	0.147487
825	6.57014e-05	3.16655e-06	2.11103e-06	0.219005
826	6.26046e-05	3.01729e-06	2.01153e-06	0.208682
827	6.08994e-05	2.93511e-06	1.95674e-06	0.202998
828	5.98505e-05	2.88456e-06	1.92304e-06	0.199502
829	4.78577e-05	2.30655e-06	1.5377e-06	0.159526
830	5.89862e-05	2.8429e-06	1.89527e-06	0.196621
831	5.55273e-05	2.6762e-06	1.78413e-06	0.185091
832	5.8024e-05	2.79653e-06	1.86435e-06	0.193413
833	6.64894e-05	3.20453e-06	2.13635e-06	0.221631
834	5.56786e-05	2.68349e-06	1.78899e-06	0.185595
835	6.12826e-05	2.95358e-06	1.96905e-06	0.204275
836	4.42767e-05	2.13397e-06	1.42264e-06	0.147589
837	4.20618e-05	2.02721e-06	1.35148e-06	0.140206
838	3.58073e-05	1.72577e-06	1.15051e-06	0.119358
839	5.81433e-05	2.80228e-06	1.86819e-06	0.193811
840	8.21904e-05	3.96125e-06	2.64084e-06	0.273968
841	0.000114314	5.5095e-06	3.673e-06	0.381047
842	4.24325e-05	2.04508e-06	1.36339e-06	0.141442
843	0.000130379	6.28377e-06	4.18918e-06	0.434597
844	3.19953e-05	1.54205e-06	1.02803e-06	0.106651
845	6.77152e-05	3.26361e-06	2.17574e-06	0.225717
846	6.46708e-05	3.11688e-06	2.07792e-06	0.215569
847	5.5608e-05	2.68009e-06	1.78673e-06	0.18536
848	7.42331e-05	3.57774e-06	2.38516e-06	0.247444
849	5.97889e-05	2.88159e-06	1.92106e-06	0.199296
850	0.000148746	7.16898e-06	4.77932e-06	0.49582
851	5.62932e-05	2.71311e-06	1.80874e-06	0.187644
852	7.57083e-05	3.64884e-06	2.43256e-06	0.252361
853	6.13295e-05	2.95584e-06	1.97056e-06	0.204432
854	8.24731e-05	3.97488e-06	2.64992e-06	0.27491
855	5.6748e-05	2.73503e-06	1.82335e-06	0.18916
856	5.9259e-05	2.85605e-06	1.90404e-06	0.19753
857	3.02273e-05	1.45684e-06	9.71225e-07	0.100758
858	3.91063e-05	1.88477e-06	1.25651e-06	0.130354
859	3.56003e-05	1.71579e-06	1.14386e-06	0.118668
860	7.46763e-05	3.5991e-06	2.3994e-06	0.248921
861	4.13038e-05	1.99068e-06	1.32712e-06	0.137679
862	8.49286e-05	4.09322e-06	2.72882e-06	0.283095
863	7.49474e-05	3.61217e-06	2.40811e-06	0.249825
864	0.000107367	5.17466e-06	3.44977e-06	0.357889
865	7.21094e-05	3.47539e-06	2.31693e-06	0.240365
866	5.09275e-05	2.45451e-06	1.63634e-06	0.169758
867	4.36983e-05	2.10608e-06	1.40406e-06	0.145661
868	5.23026e-05	2.52078e-06	1.68052e-06	0.174342
869	5.51655e-05	2.65876e-06	1.77251e-06	0.183885
870	4.44422e-05	2.14194e-06	1.42796e-06	0.148141
871	3.37136e-05	1.62486e-06	1.08324e-06	0.112379
872	3.7087e-05	1.78745e-06	1.19163e-06	0.123623
873	5.10854e-05	2.46212e-06	1.64141e-06	0.170285
874	8.76083e-05	4.22238e-06	2.81492e-06	0.292028
875	6.23864e-05	3.00678e-06	2.00452e-06	0.207955
876	6.01563e-05	2.8993e-06	1.93287e-06	0.200521
877	3.1361e-05	1.51148e-06	1.00765e-06	0.104537
878	6.61353e-05	3.18746e-06	2.12497e-06	0.220451
879	2.52944e-05	1.21909e-06	8.12726e-07	0.0843146
880	0.00010169	4.90107e-06	3.26738e-06	0.338968
881	9.66083e-05	4.65614e-06	3.10409e-06	0.322028
882	3.87736e-05	1.86873e-06	1.24582e-06	0.129245
883	5.61978e-05	2.70851e-06	1.80568e-06	0.187326
884	6.22665e-05	3.001e-06	2.00067e-06	0.207555
885	5.17224e-05	2.49282e-06	1.66188e-06	0.172408
886	4.49931e-05	2.16849e-06	1.44566e-06	0.149977
887	5.36522e-05	2.58583e-06	1.72388e-06	0.178841
888	0.000106964	5.15524e-06	3.43683e-06	0.356546
889	6.41218e-05	3.09042e-06	2.06028e-06	0.213739
890	7.6201e-05	3.67259e-06	2.44839e-06	0.254003
891	7.32599e-05	3.53084e-06	2.35389e-06	0.2442
892	5.5353e-05	2.6678e-06	1.77853e-06	0.18451
893	5.84561e-05	2.81736e-06	1.87824e-06	0.194854
894	6.90754e-05	3.32916e-06	2.21944e-06	0.230251
895	5.28914e-05	2.54916e-06	1.69944e-06	0.176305
896	4.68769e-05	2.25928e-06	1.50619e-06	0.156256
897	6.58141e-05	3.17198e-06	2.11465e-06	0.21938
898	5.05139e-05	2.43457e-06	1.62305e-06	0.16838
899	4.24943e-05	2.04806e-06	1.36537e-06	0.141648
900	7.57915e-05	3.65285e-06	2.43524e-06	0.252638
901	6.01145e-05	2.89728e-06	1.93152e-06	0.200382
902	3.52692e-05	1.69984e-06	1.13323e-06	0.117564
903	6.10441e-05	2.94209e-06	1.96139e-06	0.20348
904	5.84283e-05	2.81602e-06	1.87734e-06	0.194761
905	7.95493e-05	3.83396e-06	2.55598e-06	0.265164
906	8.74609e-05	4.21527e-06	2.81018e-06	0.291536
907	4.63874e-05	2.23569e-06	1.49046e-06	0.154625
908	9.57001e-05	4.61237e-06	3.07491e-06	0.319
909	0.000171786	8.27943e-06	5.51962e-06	0.572622
910	7.1616e-05	3.45161e-06	2.30107e-06	0.23872
911	3.74842e-05	1.80659e-06	1.2044e-06	0.124947
912	5.57549e-05	2.68717e-06	1.79145e-06	0.18585
913	7.47456e-05	3.60244e-06	2.40163e-06	0.249152
914	8.10739e-05	3.90744e-06	2.60496e-06	0.270246
915	5.68859e-05	2.74168e-06	1.82778e-06	0.18962
916	6.34924e-05	3.06009e-06	2.04006e-06	0.211641
917	6.1556e-05	2.96676e-06	1.97784e-06	0.205187
918	2.35664e-05	1.13581e-06	7.57207e-07	0.0785548
919	7.63555e-05	3.68004e-06	2.45336e-06	0.254518
920	3.313e-05	1.59673e-06	1.06449e-06	0.110433
921	5.86625e-05	2.8273e-06	1.88487e-06	0.195542
922	6.72714e-05	3.24222e-06	2.16148e-06	0.224238
923	0.000129298	6.23165e-06	4.15444e-06	0.430993
924	0.0001023	4.93048e-06	3.28699e-06	0.341002
925	8.63807e-05	4.16321e-06	2.77547e-06	0.287936
926	9.94088e-05	4.79112e-06	3.19408e-06	0.331363
927	3.52597e-05	1.69938e-06	1.13292e-06	0.117532
928	4.09364e-05	1.97298e-06	1.31532e-06	0.136455
929	6.67349e-05	3.21636e-06	2.14424e-06	0.22245
930	3.70269e-05	1.78455e-06	1.1897e-06	0.123423
931	7.25015e-05	3.49429e-06	2.32953e-06	0.241672
932	5.55319e-05	2.67642e-06	1.78428e-06	0.185106
933	2.60513e-05	1.25557e-06	8.37048e-07	0.0868378
934	0.000159155	7.67064e-06	5.11376e-06	0.530516
935	5.01941e-05	2.41916e-06	1.61277e-06	0.167314
936	3.748e-05	1.80639e-06	1.20426e-06	0.124933
937	4.60131e-05	2.21765e-06	1.47843e-06	0.153377
938	4.01962e-05	1.9373e-06	1.29153e-06	0.133987
939	3.89736e-05	1.87837e-06	1.25225e-06	0.129912
940	8.57063e-05	4.13071e-06	2.7538e-06	0.285688
941	3.16475e-05	1.52529e-06	1.01686e-06	0.105492
942	4.64006e-05	2.23633e-06	1.49088e-06	0.154669
943	3.95262e-05	1.90501e-06	1.27e-06	0.131754
944	3.07007e-05	1.47965e-06	9.86437e-07	0.102336
945	2.50852e-05	1.20901e-06	8.06006e-07	0.0836174
946	0.000101725	4.90274e-06	3.26849e-06	0.339083
947	5.56653e-05	2.68285e-06	1.78856e-06	0.185551
948	9.52868e-05	4.59245e-06	3.06163e-06	0.317623
949	7.61548e-05	3.67037e-06	2.44691e-06	0.253849
950	5.54043e-05	2.67027e-06	1.78018e-06	0.184681
951	4.51446e-05	2.17579e-06	1.45053e-06	0.150482
952	6.82896e-05	3.29129e-06	2.19419e-06	0.227632
953	5.9006e-05	2.84386e-06	1.89591e-06	0.196687
954	0.000102586	4.94423e-06	3.29615e-06	0.341952
955	4.9993e-05	2.40947e-06	1.60631e-06	0.166643
956	0.000167298	8.06312e-06	5.37542e-06	0.557661
957	5.11591e-05	2.46567e-06	1.64378e-06	0.17053
958	4.42489e-05	2.13262e-06	1.42175e-06	0.147496
959	3.34405e-05	1.6117e-06	1.07447e-06	0.111468
960	5.35319e-05	2.58003e-06	1.72002e-06	0.17844
961	6.93954e-05	3.34459e-06	2.22973e-06	0.231318
962	2.94818e-05	1.42091e-06	9.4727e-07	0.0982725
963	9.18839e-05	4.42845e-06	2.9523e-06	0.30628
964	5.69581e-05	2.74516e-06	1.8301e-06	0.18986
965	9.64474e-05	4.64838e-06	3.09892e-06	0.321491
966	7.17537e-05	3.45825e-06	2.3055e-06	0.239179
967	3.94161e-05	1.8997e-06	1.26647e-06	0.131387
968	5.27846e-05	2.54401e-06	1.69601e-06	0.175949
969	9.3852e-05	4.5233e-06	3.01553e-06	0.31284
970	4.16031e-05	2.00511e-06	1.33674e-06	0.138677
971	3.7174e-05	1.79164e-06	1.19443e-06	0.123913
972	4.1671e-05	2.00838e-06	1.33892e-06	0.138903
973	6.81339e-05	3.28379e-06	2.18919e-06	0.227113
974	2.48423e-05	1.1973e-06	7.98199e-07	0.0828075
975	6.21061e-05	2.99327e-06	1.99551e-06	0.20702
976	0.000114615	5.524e-06	3.68267e-06	0.38205
977	7.72536e-05	3.72332e-06	2.48221e-06	0.257512
978	5.35217e-05	2.57954e-06	1.71969e-06	0.178406
979	7.87744e-05	3.79662e-06	2.53108e-06	0.262581
980	9.79166e-05	4.71919e-06	3.14613e-06	0.326389
981	7.78573e-05	3.75242e-06	2.50161e-06	0.259524
982	6.25275e-05	3.01358e-06	2.00905e-06	0.208425
983	5.82334e-05	2.80662e-06	1.87108e-06	0.194111
984	5.41504e-05	2.60984e-06	1.73989e-06	0.180501
985	0.000133286	6.42388e-06	4.28259e-06	0.444288
986	7.47317e-05	3.60177e-06	2.40118e-06	0.249106
987	9.98781e-05	4.81373e-06	3.20916e-06	0.332927
988	7.09278e-05	3.41844e-06	2.27896e-06	0.236426
989	7.35259e-05	3.54366e-06	2.36244e-06	0.245086
990	6.90846e-05	3.3296e-06	2.21974e-06	0.230282
991	5.63066e-05	2.71376e-06	1.80917e-06	0.187689
992	7.87943e-05	3.79758e-06	2.53172e-06	0.262648
993	5.394e-05	2.5997e-06	1.73313e-06	0.1798
994	0.000170982	8.24068e-06	5.49379e-06	0.569942
995	6.5435e-05	3.15371e-06	2.10247e-06	0.218117
996	2.76624e-05	1.33322e-06	8.88813e-07	0.0922081
997	8.3803e-05	4.03898e-06	2.69265e-06	0.279343
998	7.49452e-05	3.61207e-06	2.40804e-06	0.249817
999	0.000125013	6.02515e-06	4.01676e-06	0.416711
1000	4.98205e-05	2.40115e-06	1.60077e-06	0.166068
1001	6.41826e-05	3.09335e-06	2.06223e-06	0.213942
1002	8.25048e-05	3.97641e-06	2.65094e-06	0.275016
1003	0.000141076	6.79929e-06	4.53286e-06	0.470252
1004	4.71035e-05	2.2702e-06	1.51347e-06	0.157012
1005	5.05327e-05	2.43548e-06	1.62365e-06	0.168442
1006	8.4369e-05	4.06626e-06	2.71084e-06	0.28123
1007	7.9459e-05	3.82961e-06	2.55307e-06	0.264863
1008	9.31686e-05	4.49036e-06	2.99357e-06	0.310562
1009	3.43398e-05	1.65504e-06	1.10336e-06	0.114466
1010	4.71893e-05	2.27434e-06	1.51623e-06	0.157298
1011	6.28568e-05	3.02945e-06	2.01963e-06	0.209523
1012	9.64962e-05	4.65074e-06	3.10049e-06	0.321654
1013	6.71435e-05	3.23605e-06	2.15737e-06	0.223812
1014	3.84267e-05	1.85202e-06	1.23468e-06	0.128089
1015	4.14125e-05	1.99592e-06	1.33061e-06	0.138042
1016	7.34976e-05	3.5423e-06	2.36153e-06	0.244992
1017	6.84738e-05	3.30017e-06	2.20011e-06	0.228246
1018	5.11155e-05	2.46357e-06	1.64238e-06	0.170385
1019	8.89558e-05	4.28732e-06	2.85821e-06	0.296519
1020	4.74734e-05	2.28803e-06	1.52535e-06	0.158245
1021	4.05647e-05	1.95506e-06	1.30337e-06	0.135216
1022	4.1989e-05	2.02371e-06	1.34914e-06	0.139963
1023	6.5661e-05	3.1646e-06	2.10973e-06	0.21887
1024	4.89786e-05	2.36057e-06	1.57372e-06	0.163262
1025	8.46914e-05	4.08179e-06	2.7212e-06	0.282305
1026	6.13879e-05	2.95866e-06	1.97244e-06	0.204626
1027	5.64236e-05	2.7194e-06	1.81293e-06	0.188079
1028	6.43592e-05	3.10186e-06	2.06791e-06	0.214531
1029	4.33931e-05	2.09138e-06	1.39425e-06	0.144644
1030	3.16742e-05	1.52657e-06	1.01772e-06	0.105581
1031	7.26382e-05	3.50087e-06	2.33392e-06	0.242127
1032	3.63364e-05	1.75127e-06	1.16752e-06	0.121121
1033	9.17909e-05	4.42396e-06	2.94931e-06	0.30597
1034	6.18922e-05	2.98296e-06	1.98864e-06	0.206307
1035	6.01645e-05	2.89969e-06	1.93313e-06	0.200548
1036	2.88774e-05	1.39178e-06	9.2785e-07	0.0962579
1037	6.0087e-05	2.89596e-06	1.93064e-06	0.20029
1038	5.8562e-05	2.82246e-06	1.88164e-06	0.195207
1039	2.86616e-05	1.38137e-06	9.20916e-07	0.0955385
1040	7.27008e-05	3.50389e-06	2.33593e-06	0.242336
1041	6.19207e-05	2.98434e-06	1.98956e-06	0.206402
1042	3.1065e-05	1.49721e-06	9.98139e-07	0.10355
1043	5.28356e-05	2.54647e-06	1.69765e-06	0.176119
1044	0.000100789	4.85765e-06	3.23844e-06	0.335965
1045	4.24379e-05	2.04534e-06	1.36356e-06	0.14146
1046	4.31231e-05	2.07837e-06	1.38558e-06	0.143744
1047	0.000102609	4.94536e-06	3.29691e-06	0.342031
1048	7.64765e-05	3.68587e-06	2.45724e-06	0.254922
1049	4.69939e-05	2.26492e-06	1.50995e-06	0.156646
1050	6.20484e-05	2.99049e-06	1.99366e-06	0.206828
1051	6.75231e-05	3.25435e-06	2.16957e-06	0.225077
1052	5.79093e-05	2.791e-06	1.86067e-06	0.193031
1053	2.83133e-05	1.36459e-06	9.09727e-07	0.0943778
1054	6.25015e-05	3.01233e-06	2.00822e-06	0.208338
1055	8.60438e-05	4.14697e-06	2.76465e-06	0.286813
1056	4.6534e-05	2.24275e-06	1.49517e-06	0.155113
1057	4.43311e-05	2.13658e-06	1.42439e-06	0.14777
1058	7.43764e-05	3.58465e-06	2.38977e-06	0.247921
1059	2.92341e-05	1.40897e-06	9.39314e-07	0.0974471
1060	7.14766e-05	3.44489e-06	2.29659e-06	0.238255
1061	9.28479e-05	4.4749e-06	2.98327e-06	0.309493
1062	8.70028e-05	4.19319e-06	2.79546e-06	0.290009
1063	0.000113455	5.46807e-06	3.64538e-06	0.378182
1064	4.43352e-05	2.13678e-06	1.42452e-06	0.147784
1065	5.88924e-05	2.83838e-06	1.89225e-06	0.196308
1066	6.90599e-05	3.32842e-06	2.21894e-06	0.2302
1067	4.31598e-05	2.08013e-06	1.38675e-06	0.143866
1068	6.36626e-05	3.06829e-06	2.04552e-06	0.212209
1069	5.75942e-05	2.77581e-06	1.85054e-06	0.191981
1070	8.43489e-05	4.06529e-06	2.71019e-06	0.281163
1071	5.38747e-05	2.59655e-06	1.73103e-06	0.179582
1072	4.53854e-05	2.1874e-06	1.45827e-06	0.151285
1073	4.08689e-05	1.96972e-06	1.31315e-06	0.13623
1074	4.88344e-05	2.35362e-06	1.56908e-06	0.162781
1075	8.00307e-05	3.85717e-06	2.57144e-06	0.266769
1076	0.000120114	5.78901e-06	3.85934e-06	0.400379
1077	6.14389e-05	2.96112e-06	1.97408e-06	0.204796
1078	9.16166e-05	4.41556e-06	2.94371e-06	0.305389
1079	5.96828e-05	2.87648e-06	1.91765e-06	0.198943
1080	8.07698e-05	3.89279e-06	2.59519e-06	0.269233
1081	1.9546e-05	9.4204e-07	6.28027e-07	0.0651533
1082	0.000112308	5.41282e-06	3.60855e-06	0.374361
1083	6.22317e-05	2.99933e-06	1.99955e-06	0.207439
1084	4.40842e-05	2.12468e-06	1.41646e-06	0.146947
1085	5.69542e-05	2.74497e-06	1.82998e-06	0.189847
1086	3.98523e-05	1.92072e-06	1.28048e-06	0.132841
1087	5.14216e-05	2.47832e-06	1.65221e-06	0.171405
1088	5.94982e-05	2.86758e-06	1.91172e-06	0.198327
1089	0.000120068	5.78679e-06	3.85786e-06	0.400225
1090	4.80339e-05	2.31505e-06	1.54336e-06	0.160113
1091	7.65033e-05	3.68716e-06	2.45811e-06	0.255011
1092	3.8346e-05	1.84813e-06	1.23208e-06	0.12782
1093	5.83685e-05	2.81313e-06	1.87542e-06	0.194562
1094	9.23537e-05	4.45109e-06	2.96739e-06	0.307846
1095	3.67971e-05	1.77348e-06	1.18232e-06	0.122657
1096	4.54155e-05	2.18885e-06	1.45923e-06	0.151385
1097	6.20788e-05	2.99196e-06	1.99464e-06	0.206929
1098	8.98427e-05	4.33007e-06	2.88671e-06	0.299476
1099	4.24613e-05	2.04647e-06	1.36431e-06	0.141538
1100	3.34584e-05	1.61256e-06	1.07504e-06	0.111528
1101	5.90697e-05	2.84693e-06	1.89795e-06	0.196899
1102	8.59647e-05	4.14316e-06	2.76211e-06	0.286549
1103	6.94941e-05	3.34934e-06	2.2329e-06	0.231647
1104	7.02302e-05	3.38482e-06	2.25655e-06	0.234101
1105	7.51301e-05	3.62098e-06	2.41399e-06	0.250434
1106	7.30536e-05	3.5209e-06	2.34726e-06	0.243512
1107	7.25859e-05	3.49835e-06	2.33224e-06	0.241953
1108	4.78632e-05	2.30682e-06	1.53788e-06	0.159544
1109	8.15782e-05	3.93175e-06	2.62117e-06	0.271927
1110	2.60646e-05	1.25621e-06	8.37475e-07	0.0868821
1111	4.77941e-05	2.30349e-06	1.53566e-06	0.159314
1112	5.34375e-05	2.57548e-06	1.71699e-06	0.178125
1113	4.61847e-05	2.22592e-06	1.48395e-06	0.153949
1114	4.96917e-05	2.39495e-06	1.59663e-06	0.165639
1115	4.8074e-05	2.31698e-06	1.54465e-06	0.160247
1116	4.96894e-05	2.39483e-06	1.59656e-06	0.165631
1117	0.000114333	5.5104e-06	3.6736e-06	0.38111
1118	4.95305e-05	2.38718e-06	1.59145e-06	0.165102
1119	3.05359e-05	1.47171e-06	9.81142e-07	0.101786
1120	3.04522e-05	1.46768e-06	9.78451e-07	0.101507
1121	4.72531e-05	2.27742e-06	1.51828e-06	0.15751
1122	6.63588e-05	3.19823e-06	2.13216e-06	0.221196
1123	4.14946e-05	1.99988e-06	1.33325e-06	0.138315
1124	5.46465e-05	2.63375e-06	1.75583e-06	0.182155
1125	4.53118e-05	2.18385e-06	1.4559e-06	0.151039
1126	6.88321e-05	3.31744e-06	2.21163e-06	0.22944
1127	2.35517e-05	1.1351e-06	7.56734e-07	0.0785058
1128	7.63907e-05	3.68173e-06	2.45449e-06	0.254636
1129	3.4263e-05	1.65134e-06	1.10089e-06	0.11421
1130	5.78499e-05	2.78814e-06	1.85876e-06	0.192833
1131	7.82942e-05	3.77347e-06	2.51565e-06	0.260981
1132	4.78171e-05	2.3046e-06	1.5364e-06	0.15939
1133	2.85636e-05	1.37665e-06	9.17767e-07	0.0952118
1134	5.56312e-05	2.68121e-06	1.78747e-06	0.185437
1135	2.95764e-05	1.42547e-06	9.50311e-07	0.098588
1136	7.31226e-05	3.52422e-06	2.34948e-06	0.243742
1137	7.8271e-05	3.77236e-06	2.5149e-06	0.260903
1138	0.000133981	6.45737e-06	4.30491e-06	0.446604
1139	7.34691e-05	3.54092e-06	2.36062e-06	0.244897
1140	3.95798e-05	1.90759e-06	1.27173e-06	0.131933
1141	3.82251e-05	1.8423e-06	1.2282e-06	0.127417
1142	0.000118545	5.71341e-06	3.80894e-06	0.395151
1143	0.000114774	5.53164e-06	3.68776e-06	0.382579
1144	0.000100967	4.8662e-06	3.24413e-06	0.336556
1145	5.15193e-05	2.48303e-06	1.65535e-06	0.171731
1146	6.05664e-05	2.91906e-06	1.94604e-06	0.201888
1147	8.79389e-05	4.23831e-06	2.82554e-06	0.29313
1148	4.19664e-05	2.02262e-06	1.34841e-06	0.139888
1149	4.16129e-05	2.00558e-06	1.33705e-06	0.13871
1150	1.96559e-05	9.47338e-07	6.31559e-07	0.0655197
1151	4.83996e-05	2.33267e-06	1.55511e-06	0.161332
1152	0.000141941	6.84102e-06	4.56068e-06	0.473138
1153	5.36546e-05	2.58594e-06	1.72396e-06	0.178849
1154	4.36329e-05	2.10293e-06	1.40196e-06	0.145443
1155	8.55284e-05	4.12213e-06	2.74809e-06	0.285095
1156	3.63013e-05	1.74958e-06	1.16639e-06	0.121004
1157	7.96456e-05	3.8386e-06	2.55907e-06	0.265485
1158	6.44944e-05	3.10837e-06	2.07225e-06	0.214981
1159	5.47132e-05	2.63696e-06	1.75797e-06	0.182377
1160	5.46694e-05	2.63485e-06	1.75657e-06	0.182231
1161	7.7629e-05	3.74142e-06	2.49428e-06	0.258763
1162	4.65332e-05	2.24272e-06	1.49514e-06	0.155111
1163	6.66358e-05	3.21158e-06	2.14106e-06	0.222119
1164	5.13668e-05	2.47568e-06	1.65045e-06	0.171223
1165	5.66048e-05	2.72813e-06	1.81875e-06	0.188683
1166	4.81766e-05	2.32192e-06	1.54795e-06	0.160589
1167	4.42844e-05	2.13433e-06	1.42289e-06	0.147615
1168	0.000120626	5.8137e-06	3.8758e-06	0.402087
1169	2.22668e-05	1.07317e-06	7.15448e-07	0.0742226
1170	3.61908e-05	1.74425e-06	1.16284e-06	0.120636
1171	0.000155891	7.51334e-06	5.00889e-06	0.519637
1172	8.42958e-05	4.06273e-06	2.70848e-06	0.280986
1173	9.98475e-05	4.81226e-06	3.20817e-06	0.332825
1174	5.0068e-05	2.41308e-06	1.60872e-06	0.166893
1175	3.72961e-05	1.79752e-06	1.19835e-06	0.12432
1176	4.09888e-05	1.9755e-06	1.317e-06	0.136629
1177	1.68905e-05	8.14055e-07	5.42704e-07	0.0563016
1178	3.84405e-05	1.85268e-06	1.23512e-06	0.128135
1179	6.18512e-05	2.98099e-06	1.98732e-06	0.206171
1180	7.04025e-05	3.39313e-06	2.26208e-06	0.234675
1181	7.62666e-05	3.67575e-06	2.4505e-06	0.254222
1182	7.12215e-05	3.4326e-06	2.2884e-06	0.237405
1183	0.000104185	5.0213e-06	3.34753e-06	0.347283
1184	6.57017e-05	3.16657e-06	2.11104e-06	0.219006
1185	3.44702e-05	1.66133e-06	1.10755e-06	0.114901
1186	5.28371e-05	2.54654e-06	1.69769e-06	0.176124
1187	6.28744e-05	3.0303e-06	2.0202e-06	0.209581
1188	8.40309e-05	4.04996e-06	2.69997e-06	0.280103
1189	4.26306e-05	2.05463e-06	1.36975e-06	0.142102
1190	5.76753e-05	2.77972e-06	1.85315e-06	0.192251
1191	5.36041e-05	2.58351e-06	1.72234e-06	0.17868
1192	5.78294e-05	2.78715e-06	1.8581e-06	0.192765
1193	4.59705e-05	2.2156e-06	1.47706e-06	0.153235
1194	8.37389e-05	4.03589e-06	2.69059e-06	0.27913
1195	5.93109e-05	2.85855e-06	1.9057e-06	0.197703
1196	6.46681e-05	3.11675e-06	2.07783e-06	0.21556
1197	2.86589e-05	1.38125e-06	9.20831e-07	0.0955296
1198	6.62323e-05	3.19214e-06	2.12809e-06	0.220774
1199	6.65014e-05	3.20511e-06	2.13674e-06	0.221671
1200	5.08053e-05	2.44862e-06	1.63241e-06	0.169351
1201	0.000181618	8.75328e-06	5.83552e-06	0.605393
1202	0.00011753	5.66447e-06	3.77632e-06	0.391766
1203	0.000118094	5.69166e-06	3.79444e-06	0.393646
1204	5.50197e-05	2.65173e-06	1.76782e-06	0.183399
1205	8.71334e-05	4.19949e-06	2.79966e-06	0.290445
1206	3.49498e-05	1.68444e-06	1.12296e-06	0.116499
1207	7.20817e-05	3.47405e-06	2.31604e-06	0.240272
1208	8.66996e-05	4.17858e-06	2.78572e-06	0.288999
1209	5.0537e-05	2.43569e-06	1.62379e-06	0.168457
1210	0.000164616	7.93384e-06	5.28923e-06	0.54872
1211	4.02575e-05	1.94025e-06	1.2935e-06	0.134192
1212	8.08015e-05	3.89431e-06	2.59621e-06	0.269338
1213	5.47419e-05	2.63835e-06	1.7589e-06	0.182473
1214	5.17033e-05	2.4919e-06	1.66127e-06	0.172344
1215	4.89015e-05	2.35686e-06	1.57124e-06	0.163005
1216	6.42482e-05	3.09651e-06	2.06434e-06	0.214161
1217	5.8029e-05	2.79677e-06	1.86451e-06	0.19343
1218	8.49621e-05	4.09484e-06	2.72989e-06	0.283207
1219	6.08084e-05	2.93073e-06	1.95382e-06	0.202695
1220	7.53059e-05	3.62945e-06	2.41963e-06	0.25102
1221	3.55385e-05	1.71282e-06	1.14188e-06	0.118462
1222	6.3118e-05	3.04204e-06	2.02803e-06	0.210393
1223	4.67204e-05	2.25174e-06	1.50116e-06	0.155735
1224	4.37999e-05	2.11099e-06	1.40732e-06	0.146
1225	8.98851e-05	4.33211e-06	2.88807e-06	0.299617
1226	4.98543e-05	2.40278e-06	1.60185e-06	0.166181
1227	0.00010178	4.90539e-06	3.27026e-06	0.339267
1228	5.1749e-05	2.4941e-06	1.66273e-06	0.172497
1229	7.88216e-05	3.79889e-06	2.5326e-06	0.262739
1230	7.62655e-05	3.6757e-06	2.45047e-06	0.254218
1231	3.96588e-05	1.9114e-06	1.27427e-06	0.132196
1232	2.04915e-05	9.87608e-07	6.58406e-07	0.0683049
1233	6.78698e-05	3.27106e-06	2.18071e-06	0.226233
1234	4.39934e-05	2.12031e-06	1.41354e-06	0.146645
1235	3.47998e-05	1.67721e-06	1.11814e-06	0.115999
1236	5.66781e-05	2.73166e-06	1.82111e-06	0.188927
1237	4.6238e-05	2.22849e-06	1.48566e-06	0.154127
1238	3.09663e-05	1.49245e-06	9.9497e-07	0.103221
1239	4.45848e-05	2.14881e-06	1.43254e-06	0.148616
1240	4.57767e-05	2.20626e-06	1.47084e-06	0.152589
1241	4.31466e-05	2.0795e-06	1.38633e-06	0.143822
1242	5.93046e-05	2.85825e-06	1.9055e-06	0.197682
1243	6.6023e-05	3.18205e-06	2.12137e-06	0.220077
1244	8.50972e-05	4.10135e-06	2.73423e-06	0.283657
1245	5.68824e-05	2.74151e-06	1.82767e-06	0.189608
1246	0.000107505	5.18134e-06	3.45422e-06	0.358351
1247	5.79115e-05	2.79111e-06	1.86074e-06	0.193038
1248	4.07386e-05	1.96344e-06	1.30896e-06	0.135795
1249	3.4492e-05	1.66238e-06	1.10825e-06	0.114973
1250	4.48679e-05	2.16245e-06	1.44164e-06	0.14956
1251	7.20331e-05	3.47171e-06	2.31448e-06	0.24011
1252	6.27005e-05	3.02192e-06	2.01461e-06	0.209002
1253	7.81375e-05	3.76592e-06	2.51061e-06	0.260458
1254	3.28588e-05	1.58367e-06	1.05578e-06	0.109529
1255	8.63086e-05	4.15973e-06	2.77316e-06	0.287695
1256	4.77316e-05	2.30047e-06	1.53365e-06	0.159105
1257	6.3814e-05	3.07559e-06	2.05039e-06	0.212713
1258	6.20452e-05	2.99034e-06	1.99356e-06	0.206817
1259	7.84442e-05	3.78071e-06	2.52047e-06	0.261481
1260	2.94133e-05	1.4176e-06	9.45069e-07	0.0980442
1261	5.56698e-05	2.68306e-06	1.78871e-06	0.185566
1262	4.36635e-05	2.10441e-06	1.40294e-06	0.145545
1263	3.93705e-05	1.8975e-06	1.265e-06	0.131235
1264	5.87506e-05	2.83155e-06	1.8877e-06	0.195835
1265	4.24449e-05	2.04568e-06	1.36379e-06	0.141483
1266	5.97017e-05	2.87739e-06	1.91826e-06	0.199006
1267	7.21923e-05	3.47938e-06	2.31959e-06	0.240641
1268	5.56575e-05	2.68247e-06	1.78831e-06	0.185525
1269	5.60384e-05	2.70083e-06	1.80055e-06	0.186795
1270	7.25891e-05	3.49851e-06	2.33234e-06	0.241964
1271	6.27696e-05	3.02525e-06	2.01683e-06	0.209232
1272	3.46931e-05	1.67207e-06	1.11471e-06	0.115644
1273	5.83912e-05	2.81422e-06	1.87615e-06	0.194637
1274	5.58055e-05	2.68961e-06	1.79307e-06	0.186018
1275	8.66855e-05	4.1779e-06	2.78527e-06	0.288952
1276	5.2873e-05	2.54827e-06	1.69885e-06	0.176243
1277	9.44682e-05	4.553e-06	3.03533e-06	0.314894
1278	6.96322e-05	3.356e-06	2.23733e-06	0.232107
1279	6.18527e-05	2.98106e-06	1.98737e-06	0.206176
1280	3.59701e-05	1.73362e-06	1.15574e-06	0.1199
1281	5.68937e-05	2.74205e-06	1.82803e-06	0.189646
1282	0.000107888	5.19979e-06	3.46652e-06	0.359627
1283	8.90925e-05	4.29391e-06	2.8626e-06	0.296975
1284	6.64278e-05	3.20156e-06	2.13437e-06	0.221426
1285	5.51092e-05	2.65605e-06	1.7707e-06	0.183697
1286	7.60149e-05	3.66362e-06	2.44241e-06	0.253383
1287	8.40332e-05	4.05007e-06	2.70005e-06	0.280111
1288	4.13834e-05	1.99452e-06	1.32968e-06	0.137945
1289	0.000102904	4.95955e-06	3.30636e-06	0.343012
1290	0.000110411	5.32137e-06	3.54758e-06	0.368036
1291	2.9695e-05	1.43118e-06	9.5412e-07	0.0989832
1292	6.91584e-05	3.33316e-06	2.22211e-06	0.230528
1293	9.23667e-05	4.45171e-06	2.96781e-06	0.307889
1294	5.86008e-05	2.82433e-06	1.88289e-06	0.195336
1295	7.95259e-05	3.83284e-06	2.55522e-06	0.265086
1296	3.14201e-05	1.51432e-06	1.00955e-06	0.104734
1297	4.5966e-05	2.21538e-06	1.47692e-06	0.15322
1298	3.97974e-05	1.91808e-06	1.27872e-06	0.132658
1299	2.68594e-05	1.29452e-06	8.63011e-07	0.0895312
1300	9.63908e-05	4.64566e-06	3.09711e-06	0.321303
1301	4.14832e-05	1.99933e-06	1.33288e-06	0.138277
1302	6.81824e-05	3.28612e-06	2.19075e-06	0.227275
1303	0.000156656	7.55019e-06	5.03346e-06	0.522185
1304	7.12248e-05	3.43276e-06	2.28851e-06	0.237416
1305	5.19997e-05	2.50618e-06	1.67079e-06	0.173332
1306	8.38086e-05	4.03924e-06	2.69283e-06	0.279362
1307	4.54059e-05	2.18838e-06	1.45892e-06	0.151353
1308	6.72619e-05	3.24176e-06	2.16117e-06	0.224206
1309	5.33179e-05	2.56971e-06	1.71314e-06	0.177726
1310	6.39223e-05	3.08081e-06	2.05387e-06	0.213074
1311	3.07883e-05	1.48388e-06	9.89251e-07	0.102628
1312	8.52231e-05	4.10742e-06	2.73828e-06	0.284077
1313	6.16196e-05	2.96982e-06	1.97988e-06	0.205399
1314	4.59844e-05	2.21627e-06	1.47751e-06	0.153281
1315	5.60187e-05	2.69988e-06	1.79992e-06	0.186729
1316	4.07062e-05	1.96188e-06	1.30792e-06	0.135687
1317	5.04064e-05	2.42939e-06	1.61959e-06	0.168021
1318	9.54507e-05	4.60035e-06	3.0669e-06	0.318169
1319	0.000142604	6.87298e-06	4.58198e-06	0.475348
1320	9.43201e-05	4.54586e-06	3.03057e-06	0.3144
1321	7.70241e-05	3.71226e-06	2.47484e-06	0.256747
1322	7.02882e-05	3.38762e-06	2.25841e-06	0.234294
1323	3.02385e-05	1.45738e-06	9.71585e-07	0.100795
1324	5.17134e-05	2.49238e-06	1.66159e-06	0.172378
1325	0.000102016	4.91676e-06	3.27784e-06	0.340052
1326	3.90569e-05	1.88239e-06	1.25493e-06	0.13019
1327	6.2062e-05	2.99114e-06	1.9941e-06	0.206873
1328	4.60125e-05	2.21762e-06	1.47842e-06	0.153375
1329	3.52426e-05	1.69855e-06	1.13237e-06	0.117475
1330	4.81049e-05	2.31847e-06	1.54565e-06	0.16035
1331	4.52014e-05	2.17853e-06	1.45235e-06	0.150671
1332	6.89046e-05	3.32093e-06	2.21396e-06	0.229682
1333	9.59745e-05	4.6256e-06	3.08373e-06	0.319915
1334	3.16555e-05	1.52567e-06	1.01711e-06	0.105518
1335	5.13667e-05	2.47567e-06	1.65045e-06	0.171222
1336	4.48201e-05	2.16015e-06	1.4401e-06	0.1494
1337	6.39685e-05	3.08303e-06	2.05535e-06	0.213228
1338	0.000115868	5.58439e-06	3.72292e-06	0.386227
1339	3.08508e-05	1.48689e-06	9.91259e-07	0.102836
1340	7.22543e-05	3.48238e-06	2.32158e-06	0.240848
1341	7.13429e-05	3.43845e-06	2.2923e-06	0.23781
1342	3.42233e-05	1.64943e-06	1.09962e-06	0.114078
1343	4.99793e-05	2.40881e-06	1.60587e-06	0.166598
1344	7.09908e-05	3.42148e-06	2.28099e-06	0.236636
1345	6.59225e-05	3.1772e-06	2.11814e-06	0.219742
1346	6.97556e-05	3.36195e-06	2.2413e-06	0.232519
1347	4.13874e-05	1.99471e-06	1.32981e-06	0.137958
1348	3.12825e-05	1.50769e-06	1.00513e-06	0.104275
1349	4.96915e-05	2.39493e-06	1.59662e-06	0.165638
1350	6.85164e-05	3.30222e-06	2.20148e-06	0.228388
1351	4.34881e-05	2.09596e-06	1.3973e-06	0.14496
1352	6.35289e-05	3.06185e-06	2.04123e-06	0.211763
1353	3.95298e-05	1.90518e-06	1.27012e-06	0.131766
1354	8.92573e-05	4.30185e-06	2.8679e-06	0.297524
1355	0.000114034	5.49598e-06	3.66398e-06	0.380112
1356	0.000100608	4.8489e-06	3.2326e-06	0.335359
1357	8.5738e-05	4.13223e-06	2.75482e-06	0.285793
1358	5.8565e-05	2.8226e-06	1.88173e-06	0.195217
1359	9.45985e-05	4.55928e-06	3.03952e-06	0.315328
1360	8.15708e-05	3.93139e-06	2.62093e-06	0.271903
1361	3.51489e-05	1.69404e-06	1.12936e-06	0.117163
1362	5.95538e-05	2.87026e-06	1.91351e-06	0.198513
1363	3.79949e-05	1.8312e-06	1.2208e-06	0.12665
1364	4.07307e-05	1.96306e-06	1.30871e-06	0.135769
1365	8.86054e-05	4.27043e-06	2.84696e-06	0.295351
1366	4.07259e-05	1.96283e-06	1.30855e-06	0.135753
1367	3.83862e-05	1.85006e-06	1.23338e-06	0.127954
1368	4.4443e-05	2.14198e-06	1.42799e-06	0.148143
1369	2.93893e-05	1.41645e-06	9.44299e-07	0.0979643
1370	8.02975e-05	3.87003e-06	2.58002e-06	0.267658
1371	4.61095e-05	2.2223e-06	1.48153e-06	0.153698
1372	6.66954e-05	3.21446e-06	2.14297e-06	0.222318
1373	0.000120786	5.82142e-06	3.88095e-06	0.402621
1374	2.95099e-05	1.42226e-06	9.48174e-07	0.0983663
1375	5.54915e-05	2.67447e-06	1.78298e-06	0.184972
1376	0.000101476	4.89073e-06	3.26048e-06	0.338252
1377	8.84259e-05	4.26178e-06	2.84119e-06	0.294753
1378	6.41251e-05	3.09058e-06	2.06039e-06	0.21375
1379	7.45445e-05	3.59275e-06	2.39517e-06	0.248482
1380	6.1126e-05	2.94603e-06	1.96402e-06	0.203753
1381	4.2225e-05	2.03508e-06	1.35672e-06	0.14075
1382	6.45428e-05	3.11071e-06	2.07381e-06	0.215143
1383	3.91852e-05	1.88857e-06	1.25905e-06	0.130617
1384	8.99879e-05	4.33707e-06	2.89138e-06	0.29996
1385	3.37676e-05	1.62747e-06	1.08498e-06	0.112559
1386	3.54129e-05	1.70676e-06	1.13784e-06	0.118043
1387	3.19583e-05	1.54026e-06	1.02684e-06	0.106528
1388	7.04019e-05	3.3931e-06	2.26207e-06	0.234673
1389	4.00977e-05	1.93255e-06	1.28837e-06	0.133659
1390	7.53687e-05	3.63248e-06	2.42165e-06	0.251229
1391	4.46072e-05	2.14989e-06	1.43326e-06	0.148691
1392	6.12029e-05	2.94974e-06	1.96649e-06	0.20401
1393	3.22228e-05	1.55301e-06	1.03534e-06	0.107409
1394	5.78461e-05	2.78795e-06	1.85864e-06	0.19282
1395	7.173e-05	3.4571e-06	2.30474e-06	0.2391
1396	4.19737e-05	2.02297e-06	1.34865e-06	0.139912
1397	7.18564e-05	3.4632e-06	2.3088e-06	0.239521
1398	8.87095e-05	4.27545e-06	2.8503e-06	0.295698
1399	6.35416e-05	3.06246e-06	2.04164e-06	0.211805
1400	7.75017e-05	3.73528e-06	2.49018e-06	0.258339
1401	8.1584e-05	3.93203e-06	2.62135e-06	0.271947
1402	0.000107615	5.1866e-06	3.45773e-06	0.358715
1403	5.08538e-05	2.45096e-06	1.63397e-06	0.169513
1404	0.000114185	5.50326e-06	3.66884e-06	0.380616
1405	0.000115607	5.57182e-06	3.71455e-06	0.385358
1406	5.55268e-05	2.67617e-06	1.78411e-06	0.185089
1407	7.0883e-05	3.41628e-06	2.27752e-06	0.236277
1408	6.96194e-05	3.35538e-06	2.23692e-06	0.232065
1409	0.000178382	8.59733e-06	5.73155e-06	0.594608
1410	2.59624e-05	1.25128e-06	8.3419e-07	0.0865412
1411	9.0597e-05	4.36642e-06	2.91095e-06	0.30199
1412	5.13577e-05	2.47524e-06	1.65016e-06	0.171192
1413	5.09377e-05	2.455e-06	1.63666e-06	0.169792
1414	8.33694e-05	4.01808e-06	2.67872e-06	0.277898
1415	4.68966e-05	2.26023e-06	1.50682e-06	0.156322
1416	3.56004e-05	1.7158e-06	1.14387e-06	0.118668
1417	1.96358e-05	9.46367e-07	6.30911e-07	0.0654526
1418	4.29119e-05	2.06819e-06	1.37879e-06	0.14304
1419	4.16749e-05	2.00857e-06	1.33904e-06	0.138916
1420	3.42075e-05	1.64867e-06	1.09911e-06	0.114025
1421	3.80872e-05	1.83565e-06	1.22377e-06	0.126957
1422	3.89133e-05	1.87547e-06	1.25031e-06	0.129711
1423	5.04553e-05	2.43175e-06	1.62116e-06	0.168184
1424	8.26593e-05	3.98386e-06	2.6559e-06	0.275531
1425	2.90475e-05	1.39998e-06	9.33317e-07	0.096825
1426	6.09421e-05	2.93717e-06	1.95811e-06	0.20314
1427	5.43712e-05	2.62048e-06	1.74699e-06	0.181237
1428	7.02817e-05	3.3873e-06	2.2582e-06	0.234272
1429	0.000124718	6.0109e-06	4.00727e-06	0.415726
1430	7.30558e-05	3.521e-06	2.34734e-06	0.243519
1431	4.33809e-05	2.09079e-06	1.39386e-06	0.144603
1432	3.69433e-05	1.78052e-06	1.18702e-06	0.123144
1433	8.17285e-05	3.93899e-06	2.62599e-06	0.272428
1434	5.88267e-05	2.83522e-06	1.89015e-06	0.196089
1435	9.36308e-05	4.51264e-06	3.00843e-06	0.312103
1436	7.34691e-05	3.54092e-06	2.36061e-06	0.244897
1437	4.47693e-05	2.15771e-06	1.43847e-06	0.149231
1438	6.3082e-05	3.0403e-06	2.02687e-06	0.210273
1439	4.71288e-05	2.27143e-06	1.51428e-06	0.157096
1440	2.27159e-05	1.09482e-06	7.2988e-07	0.0757198
1441	2.56987e-05	1.23858e-06	8.25719e-07	0.0856624
1442	5.34149e-05	2.57439e-06	1.71626e-06	0.17805
1443	9.54691e-05	4.60123e-06	3.06749e-06	0.31823
1444	4.94414e-05	2.38288e-06	1.58859e-06	0.164805
1445	8.57302e-05	4.13186e-06	2.75457e-06	0.285767
1446	7.18065e-05	3.46079e-06	2.30719e-06	0.239355
1447	0.000128237	6.18052e-06	4.12035e-06	0.427457
1448	6.03164e-05	2.90701e-06	1.93801e-06	0.201055
1449	4.36093e-05	2.1018e-06	1.4012e-06	0.145364
1450	3.6039e-05	1.73694e-06	1.15796e-06	0.12013
1451	4.97532e-05	2.39791e-06	1.59861e-06	0.165844
1452	5.9628e-05	2.87383e-06	1.91589e-06	0.19876
1453	2.68415e-05	1.29366e-06	8.62438e-07	0.0894718
1454	4.88606e-05	2.35489e-06	1.56993e-06	0.162869
1455	0.000130555	6.29224e-06	4.19483e-06	0.435183
1456	7.63788e-05	3.68116e-06	2.4541e-06	0.254596
1457	0.000143539	6.91803e-06	4.61202e-06	0.478464
1458	5.68962e-05	2.74218e-06	1.82812e-06	0.189654
1459	6.12247e-05	2.95079e-06	1.96719e-06	0.204082
1460	3.59204e-05	1.73122e-06	1.15415e-06	0.119735
1461	5.04351e-05	2.43078e-06	1.62052e-06	0.168117
1462	7.8426e-05	3.77983e-06	2.51988e-06	0.26142
1463	8.12079e-05	3.9139e-06	2.60927e-06	0.270693
1464	4.9361e-05	2.379e-06	1.586e-06	0.164537
1465	5.35315e-05	2.58001e-06	1.72001e-06	0.178438
1466	0.000112843	5.43858e-06	3.62572e-06	0.376142
1467	7.0618e-05	3.40351e-06	2.26901e-06	0.235393
1468	7.04516e-05	3.39549e-06	2.26366e-06	0.234839
1469	5.2847e-05	2.54702e-06	1.69801e-06	0.176157
1470	3.71733e-05	1.79161e-06	1.19441e-06	0.123911
1471	5.79026e-05	2.79068e-06	1.86045e-06	0.193009
1472	7.59697e-05	3.66144e-06	2.44096e-06	0.253232
1473	0.000106824	5.14852e-06	3.43234e-06	0.356081
1474	3.55907e-05	1.71533e-06	1.14355e-06	0.118636
1475	6.67178e-05	3.21554e-06	2.14369e-06	0.222393
1476	4.57158e-05	2.20332e-06	1.46888e-06	0.152386
1477	6.04514e-05	2.91352e-06	1.94235e-06	0.201505
1478	4.58506e-05	2.20982e-06	1.47321e-06	0.152835
1479	3.78969e-05	1.82648e-06	1.21766e-06	0.126323
1480	9.2656e-05	4.46566e-06	2.9771e-06	0.308853
1481	7.31829e-05	3.52713e-06	2.35142e-06	0.243943
1482	0.000134811	6.49735e-06	4.33157e-06	0.44937
1483	5.50257e-05	2.65202e-06	1.76802e-06	0.183419
1484	5.38659e-05	2.59612e-06	1.73075e-06	0.179553
1485	6.13888e-05	2.9587e-06	1.97247e-06	0.204629
1486	8.54467e-05	4.1182e-06	2.74546e-06	0.284822
1487	3.02175e-05	1.45637e-06	9.70911e-07	0.100725
1488	6.06382e-05	2.92252e-06	1.94835e-06	0.202127
1489	0.000120841	5.82405e-06	3.8827e-06	0.402803
1490	4.82402e-05	2.32499e-06	1.54999e-06	0.160801
1491	8.61086e-05	4.1501e-06	2.76673e-06	0.287029
1492	3.89309e-05	1.87631e-06	1.25088e-06	0.12977
1493	7.68973e-05	3.70615e-06	2.47076e-06	0.256324
1494	5.72933e-05	2.76131e-06	1.84088e-06	0.190978
1495	6.58119e-05	3.17188e-06	2.11458e-06	0.219373
1496	5.55009e-05	2.67493e-06	1.78328e-06	0.185003
1497	6.89724e-05	3.3242e-06	2.21613e-06	0.229908
1498	0.000188899	9.10421e-06	6.06947e-06	0.629664
1499	5.15051e-05	2.48234e-06	1.6549e-06	0.171684
1500	3.62971e-05	1.74938e-06	1.16625e-06	0.12099
1501	5.16792e-05	2.49074e-06	1.66049e-06	0.172264
1502	3.25654e-05	1.56952e-06	1.04635e-06	0.108551
1503	5.41756e-05	2.61105e-06	1.7407e-06	0.180585
1504	4.18736e-05	2.01814e-06	1.34543e-06	0.139579
1505	8.24949e-05	3.97593e-06	2.65062e-06	0.274983
1506	6.30618e-05	3.03933e-06	2.02622e-06	0.210206
1507	6.65364e-05	3.20679e-06	2.13786e-06	0.221788
1508	4.13125e-05	1.9911e-06	1.3274e-06	0.137708
1509	6.4984e-05	3.13197e-06	2.08798e-06	0.216613
1510	0.000118774	5.72442e-06	3.81628e-06	0.395912
1511	4.38638e-05	2.11406e-06	1.40938e-06	0.146213
1512	7.52918e-05	3.62877e-06	2.41918e-06	0.250973
1513	5.41249e-05	2.60861e-06	1.73907e-06	0.180416
1514	9.94643e-05	4.79379e-06	3.19586e-06	0.331548
1515	3.77287e-05	1.81837e-06	1.21225e-06	0.125762
1516	9.12864e-05	4.39965e-06	2.9331e-06	0.304288
1517	3.9474e-05	1.90249e-06	1.26833e-06	0.13158
1518	8.28386e-05	3.99249e-06	2.66166e-06	0.276129
1519	6.27417e-05	3.0239e-06	2.01594e-06	0.209139
1520	7.13076e-05	3.43674e-06	2.29116e-06	0.237692
1521	5.39078e-05	2.59815e-06	1.7321e-06	0.179693
1522	0.000104555	5.03915e-06	3.35943e-06	0.348517
1523	4.50062e-05	2.16912e-06	1.44608e-06	0.150021
1524	0.000105332	5.07661e-06	3.38441e-06	0.351108
1525	4.04635e-05	1.95018e-06	1.30012e-06	0.134878
1526	3.66058e-05	1.76425e-06	1.17617e-06	0.122019
1527	8.69973e-05	4.19293e-06	2.79528e-06	0.289991
1528	5.7188e-05	2.75624e-06	1.83749e-06	0.190627
1529	8.5876e-05	4.13889e-06	2.75926e-06	0.286253
1530	4.71654e-05	2.27319e-06	1.51546e-06	0.157218
1531	9.97023e-05	4.80526e-06	3.20351e-06	0.332341
1532	8.87501e-05	4.27741e-06	2.8516e-06	0.295834
1533	6.13174e-05	2.95526e-06	1.97017e-06	0.204391
1534	4.50652e-05	2.17197e-06	1.44798e-06	0.150217
1535	4.51426e-05	2.1757e-06	1.45047e-06	0.150475
1536	3.75474e-05	1.80964e-06	1.20642e-06	0.125158
1537	5.35436e-05	2.58059e-06	1.72039e-06	0.178479
1538	6.60899e-05	3.18528e-06	2.12352e-06	0.2203
1539	0.000103092	4.96862e-06	3.31241e-06	0.343639
1540	0.000116636	5.6214e-06	3.7476e-06	0.388787
1541	4.34386e-05	2.09357e-06	1.39571e-06	0.144795
1542	4.53149e-05	2.184e-06	1.456e-06	0.15105
1543	6.56048e-05	3.16189e-06	2.10793e-06	0.218683
1544	3.58838e-05	1.72946e-06	1.15297e-06	0.119613
1545	6.06575e-05	2.92345e-06	1.94897e-06	0.202192
1546	0.000118341	5.70357e-06	3.80238e-06	0.39447
1547	0.000103966	5.01076e-06	3.34051e-06	0.346554
1548	4.44907e-05	2.14428e-06	1.42952e-06	0.148302
1549	5.12117e-05	2.4682e-06	1.64547e-06	0.170706
1550	5.40498e-05	2.60499e-06	1.73666e-06	0.180166
1551	7.7819e-05	3.75057e-06	2.50038e-06	0.259397
1552	5.50743e-05	2.65436e-06	1.76958e-06	0.183581
1553	9.51128e-05	4.58406e-06	3.05604e-06	0.317043
1554	4.81512e-05	2.3207e-06	1.54713e-06	0.160504
1555	4.6617e-05	2.24676e-06	1.49784e-06	0.15539
1556	4.45214e-05	2.14576e-06	1.4305e-06	0.148405
1557	3.0997e-05	1.49393e-06	9.95956e-07	0.103323
1558	6.62917e-05	3.195e-06	2.13e-06	0.220972
1559	6.2436e-05	3.00917e-06	2.00611e-06	0.20812
1560	7.37883e-05	3.55631e-06	2.37087e-06	0.245961
1561	6.81014e-05	3.28222e-06	2.18815e-06	0.227005
1562	6.04477e-05	2.91334e-06	1.94223e-06	0.201492
1563	0.000101248	4.87974e-06	3.25316e-06	0.337492
1564	7.31345e-05	3.5248e-06	2.34986e-06	0.243782
1565	7.82773e-05	3.77266e-06	2.51511e-06	0.260924
1566	4.96812e-05	2.39444e-06	1.59629e-06	0.165604
1567	0.000155662	7.50229e-06	5.00153e-06	0.518873
1568	0.000126244	6.08447e-06	4.05631e-06	0.420813
1569	6.64095e-05	3.20068e-06	2.13378e-06	0.221365
1570	5.37783e-05	2.5919e-06	1.72794e-06	0.179261
1571	3.55911e-05	1.71535e-06	1.14357e-06	0.118637
1572	5.36678e-05	2.58658e-06	1.72438e-06	0.178893
1573	4.54121e-05	2.18869e-06	1.45912e-06	0.151374
1574	6.14505e-05	2.96168e-06	1.97445e-06	0.204835
1575	5.75367e-05	2.77304e-06	1.8487e-06	0.191789
1576	5.69757e-05	2.74601e-06	1.83067e-06	0.189919
1577	4.64283e-05	2.23766e-06	1.49177e-06	0.154761
1578	6.72371e-05	3.24056e-06	2.16038e-06	0.224124
1579	0.000122994	5.92781e-06	3.95187e-06	0.409978
1580	8.39929e-05	4.04813e-06	2.69875e-06	0.279976
1581	1.96216e-05	9.45683e-07	6.30455e-07	0.0654052
1582	4.4675e-05	2.15316e-06	1.43544e-06	0.148917
1583	7.74209e-05	3.73139e-06	2.48759e-06	0.25807
1584	3.96297e-05	1.91e-06	1.27333e-06	0.132099
1585	8.69925e-05	4.1927e-06	2.79513e-06	0.289975
1586	0.000116757	5.62721e-06	3.75147e-06	0.389189
1587	6.57804e-05	3.17036e-06	2.11357e-06	0.219268
1588	5.10562e-05	2.46071e-06	1.64047e-06	0.170187
1589	9.04751e-05	4.36055e-06	2.90703e-06	0.301584
1590	7.93556e-05	3.82463e-06	2.54975e-06	0.264519
1591	7.21035e-05	3.47511e-06	2.31674e-06	0.240345
1592	8.06769e-05	3.88831e-06	2.59221e-06	0.268923
1593	0.000249497	1.20248e-05	8.01653e-06	0.831658
1594	6.93782e-05	3.34376e-06	2.22917e-06	0.231261
1595	4.39773e-05	2.11953e-06	1.41302e-06	0.146591
1596	3.60577e-05	1.73784e-06	1.15856e-06	0.120192
1597	3.96803e-05	1.91243e-06	1.27496e-06	0.132268
1598	8.0927e-05	3.90036e-06	2.60024e-06	0.269757
1599	0.000151298	7.29199e-06	4.86133e-06	0.504328
1600	8.58442e-05	4.13735e-06	2.75823e-06	0.286147
1601	0.000158608	7.64426e-06	5.09617e-06	0.528692
1602	4.09496e-05	1.97361e-06	1.31574e-06	0.136499
1603	7.66819e-05	3.69577e-06	2.46385e-06	0.255606
1604	5.77908e-05	2.78529e-06	1.85686e-06	0.192636
1605	8.56035e-05	4.12575e-06	2.7505e-06	0.285345
1606	5.03142e-05	2.42495e-06	1.61663e-06	0.167714
1607	6.39282e-05	3.08109e-06	2.05406e-06	0.213094
1608	6.49527e-05	3.13046e-06	2.08698e-06	0.216509
1609	0.000129915	6.26139e-06	4.17426e-06	0.43305
1610	6.71816e-05	3.23789e-06	2.15859e-06	0.223939
1611	6.57721e-05	3.16996e-06	2.11331e-06	0.21924
1612	7.12345e-05	3.43322e-06	2.28882e-06	0.237448
1613	5.05995e-05	2.4387e-06	1.6258e-06	0.168665
1614	7.4527e-05	3.59191e-06	2.39461e-06	0.248423
1615	6.21749e-05	2.99658e-06	1.99772e-06	0.20725
1616	3.65265e-05	1.76043e-06	1.17362e-06	0.121755
1617	6.16541e-05	2.97149e-06	1.98099e-06	0.205514
1618	6.58706e-05	3.1747e-06	2.11647e-06	0.219569
1619	8.05802e-05	3.88365e-06	2.5891e-06	0.268601
1620	8.48188e-05	4.08794e-06	2.72529e-06	0.282729
1621	4.83744e-05	2.33146e-06	1.55431e-06	0.161248
1622	7.39547e-05	3.56433e-06	2.37622e-06	0.246516
1623	4.41816e-05	2.12938e-06	1.41959e-06	0.147272
1624	7.79221e-05	3.75554e-06	2.50369e-06	0.25974
1625	5.57658e-05	2.68769e-06	1.79179e-06	0.185886
1626	0.000101454	4.88971e-06	3.2598e-06	0.338182
1627	9.53396e-05	4.595e-06	3.06333e-06	0.317799
1628	8.56586e-05	4.12841e-06	2.75227e-06	0.285529
1629	3.95027e-05	1.90388e-06	1.26925e-06	0.131676
1630	5.44308e-05	2.62335e-06	1.7489e-06	0.181436
1631	5.02314e-05	2.42095e-06	1.61397e-06	0.167438
1632	2.66307e-05	1.2835e-06	8.55664e-07	0.0887691
1633	6.82031e-05	3.28712e-06	2.19142e-06	0.227344
1634	8.91992e-05	4.29905e-06	2.86604e-06	0.297331
1635	9.05836e-05	4.36578e-06	2.91052e-06	0.301945
1636	2.75367e-05	1.32716e-06	8.84773e-07	0.0917889
1637	0.000103786	5.00208e-06	3.33472e-06	0.345954
1638	3.47924e-05	1.67686e-06	1.1179e-06	0.115975
1639	0.000135389	6.52524e-06	4.35016e-06	0.451298
1640	9.88624e-05	4.76478e-06	3.17652e-06	0.329541
1641	0.000124849	6.01724e-06	4.01149e-06	0.416164
1642	6.70938e-05	3.23366e-06	2.15577e-06	0.223646
1643	5.49967e-05	2.65063e-06	1.76708e-06	0.183322
1644	6.30543e-05	3.03897e-06	2.02598e-06	0.210181
1645	0.000109223	5.26413e-06	3.50942e-06	0.364077
1646	8.24085e-05	3.97177e-06	2.64785e-06	0.274695
1647	2.81379e-05	1.35614e-06	9.0409e-07	0.0937929
1648	0.000130183	6.27433e-06	4.18289e-06	0.433945
1649	5.48798e-05	2.64499e-06	1.76333e-06	0.182933
1650	7.39225e-05	3.56278e-06	2.37518e-06	0.246408
1651	3.98266e-05	1.91949e-06	1.27966e-06	0.132755
1652	0.000148663	7.16498e-06	4.77665e-06	0.495544
1653	7.09683e-05	3.4204e-06	2.28026e-06	0.236561
1654	4.46243e-05	2.15072e-06	1.43381e-06	0.148748
1655	8.96885e-05	4.32263e-06	2.88176e-06	0.298962
1656	7.36979e-05	3.55195e-06	2.36797e-06	0.24566
1657	4.61016e-05	2.22191e-06	1.48128e-06	0.153672
1658	8.67115e-05	4.17915e-06	2.7861e-06	0.289038
1659	0.000156076	7.52226e-06	5.01484e-06	0.520254
1660	4.91163e-05	2.36721e-06	1.57814e-06	0.163721
1661	7.8347e-05	3.77602e-06	2.51734e-06	0.261157
1662	5.46351e-05	2.6332e-06	1.75546e-06	0.182117
1663	6.01491e-05	2.89895e-06	1.93263e-06	0.200497
1664	8.06045e-05	3.88482e-06	2.58988e-06	0.268682
1665	3.87339e-05	1.86682e-06	1.24455e-06	0.129113
1666	4.18811e-05	2.0185e-06	1.34567e-06	0.139604
1667	0.000123163	5.93596e-06	3.95731e-06	0.410543
1668	2.25978e-05	1.08913e-06	7.26085e-07	0.0753262
1669	3.68895e-05	1.77793e-06	1.18529e-06	0.122965
1670	7.15002e-05	3.44603e-06	2.29735e-06	0.238334
1671	7.66341e-05	3.69346e-06	2.46231e-06	0.255447
1672	5.00098e-05	2.41027e-06	1.60685e-06	0.166699
1673	4.10897e-05	1.98036e-06	1.32024e-06	0.136966
1674	7.72966e-05	3.72539e-06	2.4836e-06	0.257655
1675	7.67885e-05	3.7009e-06	2.46727e-06	0.255962
1676	0.000229009	1.10374e-05	7.35824e-06	0.763365
1677	7.47347e-05	3.60192e-06	2.40128e-06	0.249116
1678	4.75701e-05	2.29269e-06	1.52846e-06	0.158567
1679	7.50549e-05	3.61735e-06	2.41157e-06	0.250183
1680	7.90529e-05	3.81004e-06	2.54003e-06	0.26351
1681	6.00001e-05	2.89177e-06	1.92785e-06	0.2
1682	6.05943e-05	2.92041e-06	1.94694e-06	0.201981
1683	4.26618e-05	2.05613e-06	1.37075e-06	0.142206
1684	6.80558e-05	3.28002e-06	2.18668e-06	0.226853
1685	4.40122e-05	2.12121e-06	1.41414e-06	0.146707
1686	5.62752e-05	2.71224e-06	1.80816e-06	0.187584
1687	3.93821e-05	1.89806e-06	1.26538e-06	0.131274
1688	6.1918e-05	2.9842e-06	1.98947e-06	0.206393
1689	3.17891e-05	1.53211e-06	1.02141e-06	0.105964
1690	0.000126555	6.09947e-06	4.06631e-06	0.421851
1691	8.21517e-05	3.95939e-06	2.63959e-06	0.273839
1692	6.60418e-05	3.18295e-06	2.12197e-06	0.220139
1693	3.6926e-05	1.77969e-06	1.18646e-06	0.123087
1694	3.40471e-05	1.64094e-06	1.09396e-06	0.11349
1695	6.88711e-05	3.31932e-06	2.21288e-06	0.22957
1696	4.81324e-05	2.31979e-06	1.54653e-06	0.160441
1697	6.55459e-05	3.15906e-06	2.10604e-06	0.218486
1698	7.96262e-05	3.83767e-06	2.55845e-06	0.265421
1699	6.2727e-05	3.0232e-06	2.01547e-06	0.20909
1700	3.76391e-05	1.81406e-06	1.20937e-06	0.125464
1701	4.54478e-05	2.1904e-06	1.46027e-06	0.151493
1702	4.11204e-05	1.98184e-06	1.32123e-06	0.137068
1703	8.86775e-05	4.27391e-06	2.84927e-06	0.295592
1704	9.24409e-05	4.45529e-06	2.97019e-06	0.308136
1705	0.00019601	9.44689e-06	6.29793e-06	0.653365
1706	3.78306e-05	1.82329e-06	1.21553e-06	0.126102
1707	6.33801e-05	3.05467e-06	2.03645e-06	0.211267
1708	4.85868e-05	2.34169e-06	1.56113e-06	0.161956
1709	5.00991e-05	2.41458e-06	1.60972e-06	0.166997
1710	8.78171e-05	4.23244e-06	2.82163e-06	0.292724
1711	0.000151003	7.27778e-06	4.85185e-06	0.503345
1712	4.41423e-05	2.12749e-06	1.41833e-06	0.147141
1713	6.00161e-05	2.89254e-06	1.92836e-06	0.200054
1714	4.41377e-05	2.12726e-06	1.41818e-06	0.147126
1715	7.93872e-05	3.82615e-06	2.55077e-06	0.264624
1716	4.65877e-05	2.24534e-06	1.4969e-06	0.155292
1717	6.8236e-05	3.28871e-06	2.19247e-06	0.227453
1718	5.26579e-05	2.5379e-06	1.69194e-06	0.175526
1719	0.000153278	7.38742e-06	4.92495e-06	0.510928
1720	6.04033e-05	2.9112e-06	1.9408e-06	0.201344
1721	6.91184e-05	3.33123e-06	2.22082e-06	0.230395
1722	6.64088e-05	3.20064e-06	2.13376e-06	0.221363
1723	9.27633e-05	4.47083e-06	2.98055e-06	0.309211
1724	8.30703e-05	4.00366e-06	2.66911e-06	0.276901
1725	0.000106898	5.15208e-06	3.43472e-06	0.356328
1726	9.87375e-05	4.75876e-06	3.17251e-06	0.329125
1727	0.000129312	6.23234e-06	4.1549e-06	0.431041
1728	5.76237e-05	2.77724e-06	1.85149e-06	0.192079
1729	4.98563e-05	2.40288e-06	1.60192e-06	0.166188
1730	8.99945e-05	4.33738e-06	2.89159e-06	0.299982
1731	7.57649e-05	3.65157e-06	2.43438e-06	0.25255
1732	7.00011e-05	3.37378e-06	2.24919e-06	0.233337
1733	7.19373e-05	3.46709e-06	2.3114e-06	0.239791
1734	4.71285e-05	2.27141e-06	1.51427e-06	0.157095
1735	5.75899e-05	2.77561e-06	1.8504e-06	0.191966
1736	5.99662e-05	2.89014e-06	1.92676e-06	0.199887
1737	9.44317e-05	4.55124e-06	3.03416e-06	0.314772
1738	6.94772e-05	3.34853e-06	2.23235e-06	0.231591
1739	8.16855e-05	3.93692e-06	2.62461e-06	0.272285
1740	7.08566e-05	3.41501e-06	2.27667e-06	0.236189
1741	6.49489e-05	3.13028e-06	2.08685e-06	0.216496
1742	3.91739e-05	1.88803e-06	1.25869e-06	0.13058
1743	4.12075e-05	1.98604e-06	1.32403e-06	0.137358
1744	6.44157e-05	3.10459e-06	2.06972e-06	0.214719
1745	2.38757e-05	1.15071e-06	7.67142e-07	0.0795855
1746	4.59421e-05	2.21423e-06	1.47615e-06	0.15314
1747	0.000102383	4.93446e-06	3.28964e-06	0.341277
1748	4.21197e-05	2.03e-06	1.35334e-06	0.140399
1749	8.79459e-05	4.23865e-06	2.82577e-06	0.293153
1750	5.55943e-05	2.67943e-06	1.78629e-06	0.185314
1751	6.60683e-05	3.18423e-06	2.12282e-06	0.220228
1752	2.67076e-05	1.2872e-06	8.58135e-07	0.0890254
1753	6.20935e-05	2.99266e-06	1.99511e-06	0.206978
1754	4.56402e-05	2.19968e-06	1.46645e-06	0.152134
1755	5.01679e-05	2.4179e-06	1.61193e-06	0.167226
1756	7.30713e-05	3.52175e-06	2.34783e-06	0.243571
1757	5.39378e-05	2.59959e-06	1.73306e-06	0.179793
1758	8.68156e-05	4.18417e-06	2.78945e-06	0.289385
1759	4.8828e-05	2.35332e-06	1.56888e-06	0.16276
1760	8.17789e-05	3.94142e-06	2.62761e-06	0.272596
1761	4.14905e-05	1.99968e-06	1.33312e-06	0.138302
1762	4.96426e-05	2.39258e-06	1.59505e-06	0.165475
1763	8.94237e-05	4.30987e-06	2.87325e-06	0.298079
1764	6.25931e-05	3.01674e-06	2.01116e-06	0.208644
1765	3.44845e-05	1.66202e-06	1.10801e-06	0.114948
1766	2.1293e-05	1.02624e-06	6.8416e-07	0.0709768
1767	0.000184909	8.91187e-06	5.94125e-06	0.616362
1768	9.32248e-05	4.49307e-06	2.99538e-06	0.310749
1769	5.38682e-05	2.59624e-06	1.73083e-06	0.179561
1770	6.44135e-05	3.10448e-06	2.06965e-06	0.214712
1771	4.27968e-05	2.06264e-06	1.37509e-06	0.142656
1772	9.32751e-05	4.4955e-06	2.997e-06	0.310917
1773	3.7413e-05	1.80316e-06	1.20211e-06	0.12471
1774	3.17418e-05	1.52983e-06	1.01989e-06	0.105806
1775	6.88983e-05	3.32063e-06	2.21375e-06	0.229661
1776	2.64168e-05	1.27318e-06	8.48789e-07	0.0880558
1777	9.28675e-05	4.47585e-06	2.9839e-06	0.309558
1778	3.70871e-05	1.78745e-06	1.19164e-06	0.123624
1779	7.95229e-05	3.83269e-06	2.55513e-06	0.265076
1780	6.07067e-05	2.92583e-06	1.95055e-06	0.202356
1781	3.00264e-05	1.44715e-06	9.6477e-07	0.100088
1782	3.12342e-05	1.50536e-06	1.00358e-06	0.104114
1783	3.34176e-05	1.6106e-06	1.07373e-06	0.111392
1784	7.66004e-05	3.69184e-06	2.46123e-06	0.255335
1785	7.26568e-05	3.50177e-06	2.33452e-06	0.242189
1786	6.09794e-05	2.93897e-06	1.95931e-06	0.203265
1787	8.62457e-05	4.15671e-06	2.77114e-06	0.287486
1788	4.01112e-05	1.9332e-06	1.2888e-06	0.133704
1789	6.27339e-05	3.02353e-06	2.01569e-06	0.209113
1790	0.000101401	4.88712e-06	3.25808e-06	0.338003
1791	6.74315e-05	3.24993e-06	2.16662e-06	0.224772
1792	6.8621e-05	3.30726e-06	2.20484e-06	0.228737
1793	5.82072e-05	2.80536e-06	1.87024e-06	0.194024
1794	2.9666e-05	1.42978e-06	9.5319e-07	0.0988867
1795	9.72038e-05	4.68484e-06	3.12323e-06	0.324013
1796	7.36492e-05	3.5496e-06	2.3664e-06	0.245497
1797	6.54008e-05	3.15206e-06	2.10138e-06	0.218003
1798	9.40301e-05	4.53188e-06	3.02126e-06	0.313434
1799	4.50897e-05	2.17314e-06	1.44876e-06	0.150299
1800	6.70469e-05	3.2314e-06	2.15427e-06	0.22349
1801	0.00012141	5.8515e-06	3.901e-06	0.404701
1802	6.54239e-05	3.15318e-06	2.10212e-06	0.21808
1803	8.92005e-05	4.29912e-06	2.86608e-06	0.297335
1804	5.18601e-05	2.49946e-06	1.6663e-06	0.172867
1805	4.29562e-05	2.07032e-06	1.38021e-06	0.143187
1806	9.43808e-05	4.54879e-06	3.03252e-06	0.314603
1807	7.73636e-05	3.72862e-06	2.48575e-06	0.257879
1808	5.78036e-05	2.78591e-06	1.85727e-06	0.192679
1809	0.000100518	4.84458e-06	3.22972e-06	0.335061
1810	8.31559e-05	4.00779e-06	2.67186e-06	0.277186
1811	3.26335e-05	1.57281e-06	1.04854e-06	0.108778
1812	0.00011907	5.73873e-06	3.82582e-06	0.396901
1813	0.000141259	6.80815e-06	4.53876e-06	0.470864
1814	8.43194e-05	4.06387e-06	2.70924e-06	0.281065
1815	0.000145205	6.99832e-06	4.66555e-06	0.484017
1816	5.43369e-05	2.61883e-06	1.74588e-06	0.181123
1817	5.41043e-05	2.60762e-06	1.73841e-06	0.180348
1818	6.26257e-05	3.01831e-06	2.01221e-06	0.208752
1819	3.63452e-05	1.7517e-06	1.1678e-06	0.121151
1820	4.48987e-05	2.16394e-06	1.44263e-06	0.149662
1821	7.8149e-05	3.76647e-06	2.51098e-06	0.260497
1822	8.45135e-05	4.07322e-06	2.71548e-06	0.281712
1823	3.17873e-05	1.53202e-06	1.02135e-06	0.105958
1824	6.0087e-05	2.89596e-06	1.93064e-06	0.20029
1825	0.000104792	5.05057e-06	3.36705e-06	0.349307
1826	7.86235e-05	3.78934e-06	2.52623e-06	0.262078
1827	6.92322e-05	3.33672e-06	2.22448e-06	0.230774
1828	2.78265e-05	1.34113e-06	8.94085e-07	0.0927549
1829	4.56645e-05	2.20085e-06	1.46723e-06	0.152215
1830	5.66749e-05	2.73151e-06	1.821e-06	0.188916
1831	9.82519e-05	4.73536e-06	3.1569e-06	0.327506
1832	3.90817e-05	1.88358e-06	1.25572e-06	0.130272
1833	3.382e-05	1.62999e-06	1.08666e-06	0.112733
1834	6.99658e-05	3.37208e-06	2.24805e-06	0.233219
1835	6.47811e-05	3.12219e-06	2.08146e-06	0.215937
1836	0.000113557	5.473e-06	3.64867e-06	0.378523
1837	4.24691e-05	2.04685e-06	1.36456e-06	0.141564
1838	7.85616e-05	3.78636e-06	2.52424e-06	0.261872
1839	7.61422e-05	3.66976e-06	2.4465e-06	0.253807
1840	6.57535e-05	3.16906e-06	2.11271e-06	0.219178
1841	4.32509e-05	2.08452e-06	1.38968e-06	0.14417
1842	0.000112009	5.39841e-06	3.59894e-06	0.373364
1843	0.000181565	8.75074e-06	5.83382e-06	0.605218
1844	4.84004e-05	2.33271e-06	1.55514e-06	0.161335
1845	5.46052e-05	2.63176e-06	1.7545e-06	0.182017
1846	6.93731e-05	3.34351e-06	2.22901e-06	0.231244
1847	6.19491e-05	2.9857e-06	1.99047e-06	0.206497
1848	6.38182e-05	3.07579e-06	2.05052e-06	0.212727
1849	4.43417e-05	2.1371e-06	1.42473e-06	0.147806
1850	6.1543e-05	2.96613e-06	1.97742e-06	0.205143
1851	4.49873e-05	2.16821e-06	1.44548e-06	0.149958
1852	4.76583e-05	2.29694e-06	1.53129e-06	0.158861
1853	4.53842e-05	2.18734e-06	1.45823e-06	0.151281
1854	3.53059e-05	1.70161e-06	1.1344e-06	0.117686
1855	5.98255e-05	2.88335e-06	1.92224e-06	0.199418
1856	4.71625e-05	2.27305e-06	1.51536e-06	0.157208
1857	0.000159744	7.69903e-06	5.13269e-06	0.53248
1858	9.49426e-05	4.57586e-06	3.05057e-06	0.316475
1859	7.55454e-05	3.64099e-06	2.42733e-06	0.251818
1860	7.75362e-05	3.73694e-06	2.49129e-06	0.258454
1861	7.84407e-05	3.78053e-06	2.52036e-06	0.261469
1862	2.65399e-05	1.27912e-06	8.52748e-07	0.0884665
1863	2.81032e-05	1.35446e-06	9.02974e-07	0.0936772
1864	5.44742e-05	2.62544e-06	1.7503e-06	0.181581
1865	6.75255e-05	3.25446e-06	2.16964e-06	0.225085
1866	2.72983e-05	1.31567e-06	8.77114e-07	0.0909943
1867	5.61033e-05	2.70396e-06	1.80264e-06	0.187011
1868	5.47273e-05	2.63764e-06	1.75843e-06	0.182424
1869	0.000214166	1.0322e-05	6.88132e-06	0.713888
1870	3.72434e-05	1.79498e-06	1.19666e-06	0.124145
1871	9.24366e-05	4.45508e-06	2.97005e-06	0.308122
1872	6.58765e-05	3.17499e-06	2.11666e-06	0.219588
1873	5.56539e-05	2.6823e-06	1.7882e-06	0.185513
1874	6.24445e-05	3.00958e-06	2.00639e-06	0.208148
1875	8.03211e-05	3.87116e-06	2.58077e-06	0.267737
1876	3.1404e-05	1.51355e-06	1.00903e-06	0.10468
1877	0.00010201	4.91649e-06	3.27766e-06	0.340034
1878	7.70554e-05	3.71377e-06	2.47585e-06	0.256851
1879	3.8483e-05	1.85473e-06	1.23649e-06	0.128277
1880	4.98768e-05	2.40387e-06	1.60258e-06	0.166256
1881	6.57649e-05	3.16961e-06	2.11307e-06	0.219216
1882	5.40171e-05	2.60341e-06	1.73561e-06	0.180057
1883	3.35756e-05	1.61821e-06	1.07881e-06	0.111919
1884	5.25488e-05	2.53265e-06	1.68843e-06	0.175163
1885	4.07829e-05	1.96557e-06	1.31038e-06	0.135943
1886	9.95716e-05	4.79896e-06	3.19931e-06	0.331905
1887	7.23469e-05	3.48684e-06	2.32456e-06	0.241156
1888	5.76766e-05	2.77979e-06	1.85319e-06	0.192255
1889	4.64352e-05	2.238e-06	1.492e-06	0.154784
1890	3.7003e-05	1.7834e-06	1.18893e-06	0.123343
1891	6.75893e-05	3.25754e-06	2.17169e-06	0.225298
1892	3.65598e-05	1.76204e-06	1.17469e-06	0.121866
1893	6.05389e-05	2.91774e-06	1.94516e-06	0.201796
1894	0.000124421	5.9966e-06	3.99773e-06	0.414736
1895	0.000129255	6.22957e-06	4.15305e-06	0.430849
1896	9.62515e-05	4.63894e-06	3.09263e-06	0.320838
1897	5.95976e-05	2.87237e-06	1.91492e-06	0.198659
1898	4.70048e-05	2.26545e-06	1.5103e-06	0.156683
1899	3.25489e-05	1.56873e-06	1.04582e-06	0.108496
1900	5.01883e-05	2.41888e-06	1.61259e-06	0.167294
1901	9.05402e-05	4.36368e-06	2.90912e-06	0.301801
1902	4.56828e-05	2.20173e-06	1.46782e-06	0.152276
1903	2.92006e-05	1.40736e-06	9.38238e-07	0.0973355
1904	6.73977e-05	3.24831e-06	2.16554e-06	0.224659
1905	4.62891e-05	2.23095e-06	1.4873e-06	0.154297
1906	7.33319e-05	3.53431e-06	2.35621e-06	0.24444
1907	4.15526e-05	2.00267e-06	1.33512e-06	0.138509
1908	8.50268e-05	4.09796e-06	2.73197e-06	0.283423
1909	3.64688e-05	1.75765e-06	1.17177e-06	0.121563
1910	0.000100166	4.8276e-06	3.2184e-06	0.333886
1911	5.44953e-05	2.62646e-06	1.75097e-06	0.181651
1912	0.000125042	6.02655e-06	4.0177e-06	0.416808
1913	5.4662e-05	2.63449e-06	1.75633e-06	0.182207
1914	4.51635e-05	2.17671e-06	1.45114e-06	0.150545
1915	8.98234e-05	4.32913e-06	2.88609e-06	0.299411
1916	2.53792e-05	1.22318e-06	8.15451e-07	0.0845973
1917	6.8999e-05	3.32548e-06	2.21699e-06	0.229997
1918	3.67586e-05	1.77162e-06	1.18108e-06	0.122529
1919	7.64425e-05	3.68423e-06	2.45615e-06	0.254808
1920	2.47037e-05	1.19062e-06	7.93749e-07	0.0823458
1921	7.27275e-05	3.50518e-06	2.33679e-06	0.242425
1922	4.85096e-05	2.33797e-06	1.55865e-06	0.161699
1923	7.17619e-05	3.45864e-06	2.30576e-06	0.239206
1924	2.80065e-05	1.3498e-06	8.99868e-07	0.0933549
1925	4.90454e-05	2.3638e-06	1.57586e-06	0.163485
1926	3.09409e-05	1.49123e-06	9.94154e-07	0.103136
1927	3.61421e-05	1.74191e-06	1.16127e-06	0.120474
1928	6.60501e-05	3.18336e-06	2.12224e-06	0.220167
1929	3.16249e-05	1.5242e-06	1.01613e-06	0.105416
1930	4.93726e-05	2.37957e-06	1.58638e-06	0.164575
1931	4.37086e-05	2.10658e-06	1.40439e-06	0.145695
1932	5.86879e-05	2.82853e-06	1.88568e-06	0.195626
1933	8.67563e-05	4.18131e-06	2.78754e-06	0.289188
1934	7.03902e-05	3.39253e-06	2.26169e-06	0.234634
1935	2.28691e-05	1.1022e-06	7.348e-07	0.0762302
1936	6.18054e-05	2.97878e-06	1.98585e-06	0.206018
1937	2.60097e-05	1.25357e-06	8.35712e-07	0.0866991
1938	5.98816e-05	2.88606e-06	1.92404e-06	0.199605
1939	5.98398e-05	2.88404e-06	1.9227e-06	0.199466
1940	7.3521e-05	3.54343e-06	2.36228e-06	0.24507
1941	0.000111676	5.38235e-06	3.58823e-06	0.372254
1942	4.16198e-05	2.00591e-06	1.33728e-06	0.138733
1943	0.000219335	1.05711e-05	7.04739e-06	0.731117
1944	9.77463e-05	4.71099e-06	3.14066e-06	0.325821
1945	4.58558e-05	2.21007e-06	1.47338e-06	0.152853
1946	9.21059e-05	4.43914e-06	2.95943e-06	0.30702
1947	6.73521e-05	3.24611e-06	2.16407e-06	0.224507
1948	5.15003e-05	2.48211e-06	1.65474e-06	0.171668
1949	8.49304e-05	4.09331e-06	2.72888e-06	0.283101
1950	6.72738e-05	3.24233e-06	2.16156e-06	0.224246
1951	4.1115e-05	1.98158e-06	1.32106e-06	0.13705
1952	0.000113379	5.46443e-06	3.64295e-06	0.37793
1953	6.26054e-05	3.01734e-06	2.01156e-06	0.208685
1954	4.41108e-05	2.12597e-06	1.41731e-06	0.147036
1955	3.64337e-05	1.75596e-06	1.17064e-06	0.121446
1956	0.000108355	5.22228e-06	3.48152e-06	0.361183
1957	0.000104084	5.01643e-06	3.34429e-06	0.346946
1958	3.25781e-05	1.57014e-06	1.04676e-06	0.108594
1959	0.000118643	5.71813e-06	3.81209e-06	0.395477
1960	3.25106e-05	1.56688e-06	1.04459e-06	0.108369
1961	7.50156e-05	3.61546e-06	2.41031e-06	0.250052
1962	7.08936e-05	3.41679e-06	2.27786e-06	0.236312
1963	8.66719e-05	4.17724e-06	2.78483e-06	0.288906
1964	0.000111247	5.36165e-06	3.57443e-06	0.370822
1965	4.13457e-05	1.9927e-06	1.32847e-06	0.137819
1966	5.50853e-05	2.6549e-06	1.76993e-06	0.183618
1967	6.23843e-05	3.00668e-06	2.00445e-06	0.207948
1968	4.04885e-05	1.95139e-06	1.30092e-06	0.134962
1969	5.95494e-05	2.87005e-06	1.91337e-06	0.198498
1970	6.51415e-05	3.13956e-06	2.09304e-06	0.217138
1971	5.14356e-05	2.47899e-06	1.65266e-06	0.171452
1972	4.34065e-05	2.09202e-06	1.39468e-06	0.144688
1973	0.000103415	4.98419e-06	3.32279e-06	0.344716
1974	6.29308e-05	3.03302e-06	2.02201e-06	0.209769
1975	6.2476e-05	3.0111e-06	2.0074e-06	0.208253
1976	3.16898e-05	1.52733e-06	1.01822e-06	0.105633
1977	7.62332e-05	3.67414e-06	2.44943e-06	0.254111
1978	3.10108e-05	1.4946e-06	9.964e-07	0.103369
1979	5.75585e-05	2.7741e-06	1.8494e-06	0.191862
1980	3.91117e-05	1.88503e-06	1.25669e-06	0.130372
1981	4.5111e-05	2.17417e-06	1.44945e-06	0.15037
1982	0.000106957	5.15491e-06	3.43661e-06	0.356523
1983	4.16122e-05	2.00554e-06	1.33703e-06	0.138707
1984	0.000194403	9.36948e-06	6.24632e-06	0.648011
1985	4.56305e-05	2.19921e-06	1.46614e-06	0.152102
1986	4.74349e-05	2.28618e-06	1.52412e-06	0.158116
1987	1.69387e-05	8.16377e-07	5.44251e-07	0.0564622
1988	6.17625e-05	2.97671e-06	1.98447e-06	0.205875
1989	4.01305e-05	1.93413e-06	1.28942e-06	0.133768
1990	7.11668e-05	3.42996e-06	2.28664e-06	0.237223
1991	2.19732e-05	1.05902e-06	7.06016e-07	0.0732441
1992	3.69532e-05	1.781e-06	1.18733e-06	0.123177
1993	7.85915e-05	3.7878e-06	2.5252e-06	0.261972
1994	4.66915e-05	2.25035e-06	1.50023e-06	0.155638
1995	7.97075e-05	3.84159e-06	2.56106e-06	0.265692
1996	5.29687e-05	2.55288e-06	1.70192e-06	0.176562
1997	9.04015e-05	4.357e-06	2.90466e-06	0.301338
1998	7.49948e-05	3.61445e-06	2.40964e-06	0.249983
1999	7.31252e-05	3.52435e-06	2.34957e-06	0.243751
[truncated: 8,001 more rows]
